# Supplementary material for: Consensus architecture of promoters and transcription units in Escherichia coli : design principles for synthetic biology
Source: Royal Society of Chemistry journal article supplement (doi:10.1039/c6mb00789a), 2017-02-17
Supplement: c6mb00789a1.pdf [file c6mb00789a1.pdf]

### Electronic Supplementary Information Table Captions

**Table S1.** Genetic elements in the natural TUs of *Escherichia coli* K-12 MG1655.

**Table S2.** Genetic elements in strain K-12 W3110 and BL21 (DE3) of *E. coli*, *Salmonella typhimurium* SL1344, *Pseudomonas aeruginosa* PA14 and PAO1 strains.

**Table S3.** Gene Sequences K-12 W3110 and BL21 (DE3) of *E. coli*, *Salmonella typhimurium* SL1344, *Pseudomonas aeruginosa* PA14 and PAO1 strains considered in this study.
