# Supplementary material for: Consensus architecture of promoters and transcription units in Escherichia coli : design principles for synthetic biology
Source: Royal Society of Chemistry journal article supplement (doi:10.1039/c6mb00789a), 2017-02-17
Supplement: c6mb00789a3.xlsx [file c6mb00789a3.xlsx]

## Sheet: SL1344
Salmonella enterica enterica serovar Typhimurium str. SL1344 Genes codons
Data source: bacteria ensembl.org
Description of columns:
1.-Gene name
2.- Gene sequence
3.- Start codon for translation
4.-Stop codon of translation
Gene name	Sequence gene	Start codon	Stop codon
SL1344_3225	GTGGCAAAACCATCTACCAGCCTGTTGAAAAGGCGTCTGGACATTGCCGAAATCGTCCGTAAAAACGGCGAAATAAAAGTAGACGATTTGGCTGAAATGTTATCGGTTTCAGGGGTAACGATCCGTAATGATCTCAATTACCTGGAGCAGCAAGGCTATCTGAAACGCTCCTTTGGCGGAGCGATTTACACGGCCCAACCCGTCAGAGCAGCGGTAAGCCATGAAGTGGTGCAGTCGCAGGCGTTAGAGCATAGCGTAGAGCTTGAACTGGCTAAGCAAGTTGCCCGTCTGGTCTGCGACGACGATACCGTGTTTCTGGGGGCCGGAGAGGTGTTGCGTAAAGCGCTTCCTTTCCTGGGCGATTATCGGGATCTGTGCCTTATCATCAACGATCTTAGC…	GTG	TGA
sthA	ATGTTTAATAAGAAAATAATCATCCTGGCAATGTTAACTGCCGTAGCATCCACACCGGTATTTGCCCAGAACACGATTACGTTCAATGGCAAAATTTACGATCAGGCGTGTACGGTTCAGGTGAATGGCTCCACGGATACCACCATTGATTTGGGTAATTACAGCAAAGAACGCATCGCGGAAAAAGGCGCCACAACCGATTACGTGCCGTTTACCGTAAGCCTGGTTAGCTGCCCGGAAGCAGGGACTGGCGTACCAACCCAAGCCATGTTCCGCTTCCACGGCGCAACAGATGATTCTAACCCAACGTACTTCAAAAACGCGGACGAAGGATCGGAAACGGGCGCCGCGGGTGTCGGTATTTCTATTCAGAACGCTTCACATAGCGATGTGACAGAT…	ATG	TAA
SL1344_1049	ATGGAATGGAAGGTCGTTGATACAGTTATAAGTCCCTCTACCGGAGTGTCGTTCTCATGCATACATAGCCTAAAAAATCTTAGATTGACCTTATGGTATCAGGCAGATGTTTACATGCCTCCAGGTAGCATTATCATCCCCTTTAATAAGGGGGTCTTAATAAACGATAAACTTTATCCCGTTACTGTTTACAACGTTACCAGGTTTAATCCTGTTCTATGGAAATCGCTTAAAGAAAATAGCCATTGTCCTGGTAACTGCAATCCTAAACCAGAAGCCTGCAGTTATCCTTTCGAGTGTCTGGTATCCGTTTGTCCATTTGGTTTAACCAGAAATATTCAAATAGATAATAAGAAAGTTTAG	ATG	TAG
yheA	ATGTACGTTTGTTTGTGTAATGGTATAAGCGATAAAAAAATCCGCCAGGCTGTACGACAATTTCATCCACAGTCATTTCAACAGTTGCGTAAATTTATTCCTGTGGGAAATCAATGTGGTAAGTGTATTCGCGCCGCGCGAGAAGTGATGCAGGATGAGTTAACGCAAATGCCGGAATTTAAAGAGATCGCCTGA	ATG	TGA
SL1344_2244	ATGAAAAATAGATTAAAGCGTGACTTTAGTCACATATCAATTGAAATACCCAAATCCATCACCCAGGTGATTAAAGAGAAAATAAGGGAGATGATTATCCATGGCGATTTCGATCTTGGGCAAGCGATCAGTGAAAATGAACTATCAAATATTCTGATGGTAAGTAAAACACCAATTCGTGAAGCTTTTATTTGGCTGAGCTATAATGAAAACTTAGTCAACATCATTCCCCGCAGTGGGACATTTGTTTTTTCTGTCACCGACGAGGATATCAATGATCTCATCAAAATGAGGGTTATCCTTGAACAGGGCGCAATTCGTGAAGCGATGGAGAAAAATGCTAACAATGTCATAGTCGAATTAAGCAATATTTTATCGAAGTCAGCAAAAATTAATGCA…	ATG	TAA
yihW	ATGAGTCTTACCGAACTGACCGGTAATCCGCGACACGATCGGCTGTTAATGCTAATTGATGAGCGCGGCTATATGAATATCGATGAGTTAGCCAGTTTGTTGGAGGTCTCTACCCAGACGGTTCGCCGCGATATTCGTAAATTAAGCGAGCAGGGGCTGATTACGCGTCATCACGGCGGCGCTGGCAGAGCGTCCAGTGTGGTCAATACCGCCTTTGAGCAGCGAGAGGTCTCCTGGACGCAAGAGAAAAAAGCCATTGCGGAAGCCGTGGCTGACTATATTCCGGATGGCTCCACGATATTTATCACGATTGGAACGACGGTTGAGCAGGTGGCGCGCGCGCTGCTCAACCATAATCATCTGCGCATTATCACCAATAGCCTGCGCGTCGCGCACATT…	ATG	TGA
SL1344_2986	ATGCACTATCACCGTATACCCCACAGCTCGCTCGAAGTAAGTACGCTAGGGCTGGGCACAATGACATTTGGTGAACAAAACAGCGAAGCCGACGCTCACGCACAGCTCGACTATGCCATCGCAAATGGCATTAACCTTATCGACGCCGCCGAGATGTATCCGGTACCGCCGCGCCCGGAAACACAAGGGCTGACGGAGTCCTATATCGGTAACTGGCTCGCCAAACGCGGCAACCGTGAAAAACTGATCATCGCCAGCAAAGTTAGCGGACCGGCACGTAATAATGATCAAGGCATCCGGCCTCATCAGGCGCTGGATCGTAAAAATATTCGCGAAGCGCTACACGACAGTTTGACCCGATTGCAGACCGACTATCTGGATTTGTATCAGGTGCACTGG…	ATG	TGA
msrA	ATGAGTTTATTTGATAAAAAACATCTGGTTACTCAAGCAGATGCGTTACCAGGACGCAACACCCCGATGCCGATCGCCACTCTGCATGCGGTAAATGAACACTCTATGACCAATGTCCCTGCCGGGATGGAGATCGCCTACTTCGCTATGGGCTGTTTCTGGGGCGTAGAACGTTTATTCTGGCAATTGCCCGGCGTATATAGCACCGCGGCAGGGTATGCAGGCGGTTACACGCCTAATCCAACCTACCGGGAAGTCTGCTCCGGGCAGACCGGTCATGCCGAAGCGGTACGGATAGTGTACGATCCTGCCGTTATCAGTTATGAGCAGCTTTTACAGACCTTCTGGGAAAATCACGATCCGACGCAGGGGATGCAACAAGGTAACGATCACGGTACG…	ATG	TGA
djlA	ATGCAGTACTGGGGAAAGATAATTGGCGTCGCCGTAGCCCTGATGATGGGCGGCGGCTTTTGGGGCGTGGTCCTGGGTCTGCTGGTGGGCCATATGTTCGACAAAGCCCGCAGCCGAAAAATGGCGTGGTTTGCCAACCAGCGGGAACGGCAGGCGCTGTTTTTTGCCACCACCTTTGAGGTGATGGGCCACTTAACCAAATCAAAAGGACGGGTGACGGAAGCGGATATTCATATCGCCAGTCAGTTGATGGATCGTATGAATTTACACGGCGATTCACGTACTGCCGCGCAGAACGCCTTTCGGGTCGGAAAAGCGGATAATTACCCATTACGTGAAAAGATGCGGCAGTTTCGTAGCGTCTGCTTCGGGCGTTTTGATCTGATCCGGATGTTTCTG…	ATG	TGA
SL1344_0704	ATGAATGATTTGAAAGAAGCTCTGGCCAGGCACCAACTTTGGATTTCGCTAGGTTGGAATGATGTCCTGGGACGATACCGGCGATCGGTGTTAGGGCCTTTTTGGATAACGATTTCGATGGGGGTCACCATATCAGCGATGGGACCTCTTTACGGTTCGCTGTTCAGTTCTGGTTCCGAAAATTTTATCATGCATCTTACTTTAGGTATGATCTTTTGGGCCTTTCTATCAGCAACTATTAATGAGTCATGCGGAATATTTAATGAGTCCGCATCAATTATTAAACAATCTGACCTTCCGCTATATTTATATATATTACGTGTTTTCTATCGGCAGTTTATGATTATGTTGCATAATTTTATCATTATACCTTTCGTGATTTTTTTTACCAATACATCG…	ATG	TAA
oppD	ATGAGCTTATCAGAAACCGCAACTCAGGCGCCGCAACCGGCGAATGTACTGCTGGAGGTAAACGATCTTCGTGTTACGTTCGCTACGCCTGATGGCGATGTGACGGCGGTCAACGATCTGAACTTTACGCTTCGCGCTGGAGAAACGTTAGGTATTGTTGGCGAGTCTGGATCGGGGAAATCGCAAACGGCGTTCGCATTAATGGGACTGCTGGCGACGAATGGTCGAATCGGCGGTTCCGCGACCTTCAACGGACGTGAAATTCTTAATCTACCTGAGCGCGAACTGAATACGCTGCGCGCAGAACAGATTTCGATGATTTTTCAGGACCCGATGACCTCGCTAAATCCTTATATGCGCGTTGGGGAGCAGTTAATGGAAGTCCTGATGCTGCATAAA…	ATG	TGA
SL1344_P2_0020	ATGGCTGATGCGTCAAAACTTAGAACTAAAAGAACCCGTAGTGGGTTGGGGGTACCCCCGGGCCCCGACGAAGTGGCTACCAGCTTGAATGCGCCTGAGATAGCTCCGGCTGTCGCTGCCACTGATGTTCAGAGACAACAGGCAGACTCATCGCCAGTGCACCATGAGCCTGTGGTTACGCAAACAGTGACCGAGGTATATACCCGCCGCGATGGCCGTTCTGCCAGAAAAACAAACAGGACGCTGGCATTTGCAACACGTGTCACACCTGCTTTCGACCAAGAGATCCGGGATATCGCAGAGCGTGAGGGGTTGAAACTGGTGGAAGTTCTGGAAAAAGCAGTTGAGGCATATAAGGAAAAACAGGGCTATTAA	ATG	TAA
pocR	ATGCGGCAGCATCCCCAGCATAGTACACGTTGTCGTATGAGCGATCGCTGCGGGGGACTGGAGGCATCGAAGTCCGATCAACCCTGTATTTATCGTTGTCATGCCGGTCTAACGGATTTTTCTATTCCGCTGGTAATCGCAGGGCATTTAGTTGGCTTTGTTTTATGCGGGCAGGTTCGTTTAAGTAATGACGTGGAGCTGGTAAACATTCTTAATGTTGACGATCGCTGGCAGGCTGACCCTGAGCTCTTGAATGAATTTCGGAATGTGCCAGAGATGGACTATTCACGCGTTATCGCTTCCGCCGATCTTCTTAAACTGATTGTTGAGAATTGCCTGAAAAAACAGCTCAATTTCGTGGTTATCAAAGACAATCCGCAGCAATCGGAGGCAAATAAA…	ATG	TGA
ylaB	GTGACAACACGACATCTGGTCAGCCTGGTAACGGGAGTGCTTATCCTGTCTGTCCTTTTCCCGATAGGATTGAGTCTGTGGCTGGCGCACCGTCAAGTTGAAAAGAGGTTTAATGAAGAGCTGGATATCTTCTCGTCCCGGGTGGCGCTACGTACAGAAAGGGTCAGTGACCAGGCAAAAGCCGCGTTAACGCATATTGCCTCCTTTAAAGGCGAGCCCTGCAGCAGTGCCCATTTACTCGCCATGCGCCGCGTGTCTTATAGCTTTCGGTATGTCCAGGAAGTTCTGTATCTTAAAAATTCGATTCCCGTTTGCTCCTCACTTGAAAAAGAGAGCCATATTCCCGCGTTCCCTCCGCCCATGAAAATCACTCGCGACGGTTATCGCGCCTGGTTTACG…	GTG	TAA
SL1344_2746	ATGTTAATAATCATTGCTCTGCTTTGGTGTAAAAAGGATATTAGAGATTCTTTTTATCAACTTATCAAAACATTTTTCCATAAACAAATTTTGACAGTATTAGGATTTGCGGTTGTTTGGACGTCTATTTGTATTGTGCTTTTTTATGAAATTGGTGTTTGGAGTACAGATAATCTTAAGACCACTTTGGTATGGGTAATTACATATGCTTTCGTAACAATCTTTGAAACACATAAAATAAAGAGCAGTAAGTATTATTTTAAATCACAAATCAAAGAAACGATTGGATTAAGTGCTCTACTTACATTTATTCTTGAACTACAAAGTTTTTCCTTTGCTATAGAGTTTATAATATACCCTATTATGCTTTTTTTAGGGTTGCTGGCTGTCGTAGCTAAT…	ATG	TAA
SL1344_1434	ATGCTAAAGACGACTCTGCTTTTCTTTGTCACCGCCCTCTGTGAAATCATTGGATGTTTTCTTCCCTGGCTATGGCTTAAGCGCGGCGCCAGCGTGTGGTGGCTTCTGCCCGCCGCTGCGTCACTTGCGTTATTCGTCTGGCTTTTGACCTTGCATCCGGCGGCGAGTGGGCGGGTTTATGCGGCTTACGGTGGGGTATATGTCTGTACTGCGCTCCTGTGGTTACGTGTTGTCGATGGCGTCCGGCTCACGGTTTATGACTGGTGCGGCGCGCTGATCGCGCTGTGTGGAATGCTGATTATCGTCGTCGGATGGGGACGTACGTAA	ATG	TAA
SL1344_2597A	ATGGAAAACACAAATATTGTTACCACTGAGCAGCAGGCACCAAACACCATTTCTGCCAGTAACGCAATTTTTAACGTTCAGGCACTGGGTCAGTTAACAGCTTTCGCTAACCTGATGGCAGACTCACAGGTGACGGTACCGGCACACCTTGCAGGGAAACCAGCCGACTGTATGGCTATCGTCATGCAGGCTATGCAATGGGGCATGAACCCTTACGCTGTGGCTCAGAAAACACACCTGGTTAACGGTGTTCTTGGTTACGAGGCACAACTGGTCAACGCAGTAATCGCAAGCTCCAGTGCCATTCATGGCCGTTTTCATTACCGCTATGGGGGTGACTGGGAGCGCTGCACCAGGACACAGGAAATCACACGCGATAAAAACGGTAAAAATGGGAAG…	ATG	TAA
fliS	ATGTACACCGCGAGCGGTATCAAAGCTTATGCGCAAGTCAGCGTGGAAAGCGCCGTGATGAGCGCCAGCCCGCATCAGTTGATTGAAATGTTGTTTGATGGCGCGAATAGCGCTCTGGTGCGCGCTCGCCTGTTTTTAGAACAAGGCGATGTTGTCGCGAAAGGTGAAGCGTTAAGCAAAGCCATCAATATTATCGATAACGGGCTGAAAGCCGGCCTCGATCAGGAAAAAGGCGGTGAGATTGCGACGAATCTTTCCGAGCTATACGACTATATGATTCGCCGTTTACTGCAGGCTAATTTGCGTAACGACGCTCAGGCCATCGAAGAAGTGGAAGGGTTACTCAGCAATATTGCAGAAGCCTGGAAGCAGATTTCACCGAAAGCATCTTTCCAGGAG…	ATG	TAA
secB	ATGTCAGAACAAAATAACACTGAAATGGCTTTCCAGATCCAACGTATCTATACCAAGGATGTTTCTTTCGAAGCGCCAAACGCACCGCATGTTTTCCAGAAAGATTGGCAGCCAGAGGTTAAACTGGATCTTGATACGGCATCTTCCCAACTGGCGGATGACGTTTATGAAGTTGTGCTGCGTGTTACCGTAACGGCTTCCCTGGGGGAAGAAACCGCGTTCCTGTGCGAAGTTCAGCAGGCCGGTATTTTCTCCATCAGCGGTATTGAAGGTACTCAGATGGCGCATTGCCTGGGCGCATACTGCCCGAACATTCTGTTCCCGTATGCTCGCGAGTGCATCACCAGCCTGGTTTCACGCGGTACGTTCCCGCAACTGAACCTTGCGCCGGTCAACTTT…	ATG	TGA
tsf	ATGGCTGAAATAACCGCATCCCTGGTAAAAGAGCTGCGTGAGCGTACCGGCGCAGGCATGATGGATTGCAAAAAAGCGCTGACTGAAGCGAATGGCGACATTGAGCTGGCAATCGAAAACATGCGTAAGTCCGGCGCTATCAAAGCGGCGAAAAAAGCAGGCAACGTGGCTGCTGACGGCGTAATCAAAACCAAAATCGACGGCAACGTCGCTTTCATTCTGGAAGTTAACTGCCAGACTGACTTCGTGGCTAAAGATGCTGGCTTCCAGGCATTTGCTGACAAAGTGCTGGACGCCGCTGTTGCTGGCAAAATCACTGACGTAGAAGTTCTGAAAGCACAGTTCGAAGAAGAGCGCGTTGCTCTGGTAGCGAAAATTGGCGAGAACATCAACATTCGT…	ATG	TGA
SL1344_2480	ATGGAAATAACCTGCCCCGTTTGCCATCACGCGCTGGAGCGCAATGGCGATACAGCGCATTGCGAGACATGCGCTAAAGATTTCTCGTTACAGGCACTTTGTCCTGACTGCCGCCAGCCGTTACAGGTTTTGAAAGCCTGCGGCGCAGTGGACTATTTTTGCCAGAACGGTCATGGTTTAATTTCAAAAAAACGGGTTAATTTCGTCATTTCCGATCAATAA	ATG	TAA
SL1344_1196	ATGGAGTATTTAGCACGACTAAATATCGTTGCGATGCTGATGTCAACGACGTTCTGGATCAATCTGGCGGTCGTTTTTTTCGTCACCCTCATTACTTACTGGCTCATCAACTGGCTACTTAATGTGGTCTATAAAGCGCTACAACGCCCGGATAAAAAGGATGATGCTCATGGGCGGCTGCGTCCTATTGTTTTCGAGATGCTGAAAAAGACCAGTAAGATGCTAATCTTTTTTGCCGCATTTCTCTTTAGCCTGCGCTTTGTCGCCCTGCCTGACCGGTTATTCTCTACCCTCTCTCACGCCTGGTTTTTAGTGGTTGCGATTCAAATGGCGATTTGGCTTGATCAGGGCGTACAGTCATGGATGCGTCATTTACTGTATGCCCCAGGCTCCAATAAA…	ATG	TAA
SL1344_3224	ATGAACATAACAATCGCAACATTGGGTGAATTGCTCGTCGAGTTTCTGGCAAAAAAAGAGAACCAGGGATTTTCCTCACCGGGGGAATTTTGGGGGCCGTATCCCAGTGGGGCGCCTGCCATATTTGCCGATCAGGTTGCTAAACTTGGTTTTCGTTCATTGTTGTTTAGCTGTGTTGGCAACGATGCCTTTGGCGTTATGAATATTACCCGATTGTCGCGCGATGGCGTAAATGTACAGGGAATTTCCGTACTGCCGAACGCCACAACAGGTAGTGCTTTTGTCAGCTACCGAAGCCAGGCCCAGCGAGATTTTATTTTCAACATGCCGGACAGTGCGTGCGGTTTGCTGAGTGCCGACCACCTTGATGAAACATTACTCAGGCAATATCGCCACTTT…	ATG	TAA
SL1344_1048	ATGCTGGCGGTGTGTATGCTGGCGCAAAGCCACCTTGCCATTGCTGCCGGTACTCCTGCGCCTCAAGAGATCAACATTGTTTTACTGGGCACCAAAGGCGGGCCTTCTTTGCTCAATACAGCCAGACTACCGCAAGCGACGGCGCTTACTATCGGCGATAAAATATGGCTGATAGATGCCGGCTACGGCGCCAGTCTGCAACTGGTGAAAAATGGCATTCCACTGCGCAACATCAATACTATTTTGCTCACCCATCTGCACAGCGACCACATACTGGATTATCCTTCCTTGCTGATGAATGCCTGGGCGAGTGGTCTGAAAGACCATACCATACAGGTTTATGGCCCGCCGGGAACCCAGGCGATGACGAAGGCTAGCTGGAAGGTCTTTGACAGGGAT…	ATG	TAG
SL1344_2243	ATGAGTAGTCCACAAGAAAATTTATACGATGCAATTCGTATTGTAAAAAGGAAAATCATTCCTTTGGCCTTTATTCTTTACTTTTTTAACTATATGGATCGTGTCAATATTGGGTTTGCTGCATTACGCATGAATGAATCTCTCGGTATTACGCCTGAGGATTTCGCTAATATTTCTTCTATATTCTTCATATCATATTTAATCTTTCAAATTCCGAGTAGCATTGGCTTGCAAAAGCTTGGCGCAAGAAAATGGATTAGTTCCATTATTATCGGCTGGGGAGCGGTAACTGGGCTGATTTTTTTTGCTAAAGATACTCAACATATTTTGCTGGCTCGCATTTTTTTGGGGGTATTTGAAGCTGGCTTTTTCCCGGGCATGGTTTATTATCTTGCATGC…	ATG	TGA
yihV	ATGACCATGGTTCGTATTGCTTGTGTAGGTATTACCGTGATGGATCGCATCTATTACGTGGAAGGATTACCGACAGAAGGGGGTAAATATGTGGCGAAGCGCTATACGGAAGTGGGCGGCGGGCCTGCGGCGACCGCTGCCGTGGCTGCGGCGAAATTGGGCGCACAGGTGGACTTTATTGGCCGTGTGGGCGATGACGACACCGGAAACAGCCTGCTGGCGGAACTGGAATCCCTGGGGGTAAATACCCGCTATACCCGCCGCTACACGCAGGCCATGTCGTCGCAGTCAGCGATTATGGTGGATGCCAAAGGAGAGCGGATTATCGTTAATTATCCCAGCCCGGATTTATTACCTGACGCCGACTGGCTTAACGACATCGATTTTTCGCAGTGGGAT…	ATG	TAA
SL1344_2985	ATGAAAAAGTGGGCAGTTGTAATTTCCGCAGTAGGGTTGGCTTTTGCGGTATCCGGATGCAGCAGCGATTATGTAATGGCGACGAAAGATGGTCGTATGATCCTGACCGATGGAAAACCACAAGTTGACGATGATACCGGTCTGGTCAGCTATACCGATGCACAGGGAAACGAGATGCAAATCAACCGTGACGAAGTATCCCAAATCATCGAACGTTAA	ATG	TAA
ytfL	ATGTTAAACAGTATATTCATTATATTCTGCCTGATCGCTGTAAGTGCGTTCTTCTCCATCTCCGAGATCTCGCTTGCCGCATCACGTAAGATTAAACTTAAGTTATTAGCTGATGAAGGCAGTATCAACGCACAACGCGTATTGAAAATGCAGGAAAATCCCGGCATGTTTTTCACCGTTGTGCAAATTGGCCTGAACGCCGTCGCTATTCTTGGCGGTATCGTCGGCGATGCGGCATTTTCGCCCGCCTTTTCCGCCCTCTTCTCGCACTATATGTCGCCAGAACTCTCCGAGCAGCTGAGCTTTATTCTCTCTTTCTCGCTGGTGACGGGGCTGTTTATCCTGTTCGCGGATTTAACCCCGAAACGCATCGGTATGATTGCGCCAGAAGCTGTGGCT…	ATG	TGA
imp	ATGAAAAAACGTATTCCCACTCTTCTGGCCACCATGATCGCCAGCGCCCTTTATAGTCATCAGGGGCTGGCAGCCGATCTCGCCTCACAGTGTATGTTGGGCGTGCCGAGCTACGATCGTCCTCTGGTAAAAGGCGATACCAACGATCTGCCGGTTACTATCAATGCCGATAACGCTAAAGGTAACTACCCGGACGATGCCGTTTTTACCGGCAACGTGGACATTATGCAGGGGAATAGCCGCCTGCAAGCGGATGAAGTGCAGCTTCATCAGAAGCAGGCGGAAGGTCAGCCGGAACCTGTACGCACCGTCGATGCGCTGGGTAATGTGCATTATGATGACAATCAGGTCATCCTTAAAGGGCCGAAGGGCTGGGCGAACCTGAACACCAAAGACACG…	ATG	TAA
SL1344_0703	ATGAAAAGGTTATGTTATTTTGTAAATTCAGACTGGTACTTTGATTTACATTGGACAGAACGTGCGATAGCGGCAAGGGATGCGGGTTATGAAATTCATATCATAAGTCATTTTATTGGTGAAGAGATTATAAAAAAATTCAAAACGCTTGGTTTTATTTGTCACAATGTGTCTCTTGTTGCTCAGTCATTTAATATGTTTGTTTTTTTTAGAGCATTCCTTAACGCTCGGAAAATTATTAAAGAGATTAATCCTGACTTATTGCATTGTATTACGCTCAAACCTTGCCTGATTGGTGGGGTTAGCGCCAGGAGAAGTAATAGTCCAGTTGTTATCAGCTTTGTCGGACTTGGTCGAATCTTTTTATATAATACCGTGCCAATGAGAATATTGCGTGCG…	ATG	TAA
SL1344_4160	ATGATGAAAAGGACGATAAGCGCGCTGGCGCTGGCCTTTGTCGCGTCATCCGCCTTTGCCAGCGGCACTGTTACCGTTTTTACCCAGGGTAATAGCGAGCCTAAAACGCTGACAGACGCTGAGCGTCTGCTCGATTTAGTCGGACAGCCGCGCCTGGCAACGAGCTGGTGGCCTGCGGCGGTGATAGGCGAAGAACAGGCGACCGTGACGGCGCGTCAGCAGCAACAGGAACTTCTCGGGCGGCTGGCGGTGCTCAGCGCTGAGGAAGACGGCGATGCTGCGGCGGCGATAAACACACTGCGCCGACAGATTCAGGCGGTGAAGGTGACGGGCAGACAATTCGTGAATCTTGATCCTGACGTGGTTCGGGTGAGCGAACGAGGTAACCCGCCGCTGCAA…	ATG	TAA
oppF	ATGAATGCTGTGATTGAACAACGTAAAGTTCTCCTCGAAATCGCCGATCTGAAAGTACATTTTGATATCAAAGAAGGGAAGCAGTGGTTCTGGCAACCGCCGAAAACCCTGAAAGCGGTGGACGGCGTTACGCTACGCCTGTATGAAGGCGAAACGCTGGGCGTGGTGGGCGAATCCGGCTGCGGCAAGTCGACGTTTGCGCGCGCGATTATTGGTCTGGTGAAGGCGACAGATGGTAAAGTCGCCTGGCTGGGAAAAGATCTGCTGGGCATGAAAGCGGATGAGTGGCGCGAGGTGCGCAGCGATATCCAGATGATTTTCCAGGACCCGCTGGCGTCACTCAACCCGCGAATGACGATTGGCGAAATTATCGCTGAACCGCTGCGCACTTATCATCCT…	ATG	TAA
parA	ATGGCCTGGATAGTTGGTTTTATTTCTCAGAAAGGTGGTGTGGGCAAAAGCACTAAAGCGAGAGCGTTAGCGCGTGAAGCATCCGCCTGTGGTATCAAAACAAAATTAGCTGATCTCGACTTGGAACAGGCAACGAGTGCTGAGTGGCATCGTAGACGTCTGTCAGCTGGTTTGTCACCGGTTGCTTCCGTTGAAGTGTTTTCAACAGCAAAGCAGGCGATAGAATCTGCCGGCGATTTTGACCTTCTGATTCTTGATGGCCCTGCTCGTGCAAGTAAAGGTACTTCAGAAATTGCTAAGGTCGCCGACCTTATCGTCCAGCCAACGGGAGCCTCCCTTGACGATCTTGTCCCGGCAATTAAAGTTTTCAACGCGTTGGTAAAAGAAGGTATACCACGT…	ATG	TAA
yhdA	ATGCGATTAACGACGAAATTCTCAGCTTTTATCACGCTGCTCACGGGGTTAACGATCTTCGTGACTCTGATAGGTTGCTCGCTAAGCTTTTATAACGCCGTACAGTATAAGTATGTCAGCCGTGTGCAGGCGACGGCGACAGCCATTGATACGCACCTGGTGACCCATGATATTGTCTCGCTGACGCCGCAAATCGACGAACTCATGATCGCTTCCGATATTGTGCGTGTCGATCTGTTGCAGGGGGAGCGCAGCGTCTACAGCCATTCTCGTGCCAGAGGTTATCGGCCAGCCGGCACCAGCGACATGTATCGCGAGCTGGTCGTACCGCTGATAAAACATCCAGGAATGTCGCTACGTCTGGCTTATCAGGACCCGATGGGTAACTATTTTCACTCA…	ATG	TAA
SL1344_2745	ATGAAAATTTCATATTTAAAATCATCTCCGTCAATGATTGAAGTTTTAAAAAATAACTATGAAGCATTTATAATTCAAAACTATAAATTCAATCACTTAGGTTTATTTCATGACGAAGACAGTATTTATGCTGTAATACAGAATTACAAAGAATCTAATACTACGTTAGATGAAATACAAGAACTTTACAACTACAGATTTAAAACCGCAGGTGTTCCGGGACCAACGTTTACAGAAGAAGTAAAAGACAACTATATAAAAATAGATCTTAGAAATACATATGAAAAAGTAAGTTTATTTGGCCAACCATTTAACGCATTCGAATTTAATAATAACATACGCATAGCCATACCATCTAAATTTCATCCTTTTCATGTTGACATGAAGTGGTCCGACAAC…	ATG	TAG
cbiA	ATGGCGGCAAGGCATCACGCATTTATTCTTGCAGGCACAGGAAGCGGTTGCGGCAAAACCACGGTGACGCTTGGTTTGTTGAGGCTGCTGCAAAAACGCGCGCTGCGCGTACAGCCGTTTAAAGTTGGGCCAGATTACCTTGATACCGGCTGGCATACCGCTATCTGTGGCGTGGCGTCCCGTAATCTTGACAGTTTCATGCTTCCTCCTCCTGTTCTCAACGCCTTATTTTGCGAACAAATGCGGCAGGCGGATATCGCTGTCATTGAAGGGGTCATGGGGTTGTATGACGGCTATGGCGTCGACCCCAATTACTGCAGCACAGCCGCGATGGCCAAACAGCTTGGTTGCCCGGTCATCCTACTGGTGGACGGCAAGGCTGTTTCAACGTCGCTTGCG…	ATG	TGA
ybaZ	ATGCTGGTTTCTTGCGCATCCGGGCTTTCCTCCCCCCTTATTCCAGATTATCCTGAAGCATTAACGCAGGATTCTATTATGGATATTCAGGACACATTTCCTCAACGCGTCTGGCAAATCGTCGCCTCGATCCCGGAAGGGTTTGTCACGACCTACGGCGATGTCGCCCGGCTTGCCGGTTCGCCTCGGGCGGCGCGTCAGGTCGGCGGAGTTTTAAAACGTCTGCCGGAAGGCAGCACTTTACCATGGCATCGGGTGGTGAACCGCCACGGCGCAATATCACTTACCGGGCCGGATCTACAGCGGCAACGTCAGGCATTACTGGCGGAAGGCGTGGTGGTGTCGGGAAGCGGACAAATCGATTTACAATGCTATCGCTGGGTGTATTAA	ATG	TAA
uspA	ATGGCTTATAAACACATTCTTATCGCAGTTGATCTCTCCCCGGAAAGTAAAGTTCTGGTTGAAAAAGCGGTCTCTATGGCGCGCCCCTACAACGCGAAAATCTCCCTCATCCACGTTGATGTGAACTATTCTGACCTGTACACCGGTCTGATTGACGTCAATCTGGGCGATATGCAGAAACGTATCTCCGAAGAAACCCACCACGCGCTGACCGAGCTGTCTACCAACGCTGGCTACCCTATCACTGAAACCCTGAGCGGTAGCGGCGATTTGGGCCAGGTGCTGGTTGATGCCATCAAGAAATACGATATGGATCTGGTCGTTTGCGGTCATCACCAGGACTTCTGGAGCAAACTGATGTCTTCTGCGCGCCAGCTGATCAACACCGTTCACGTTGAC…	ATG	TAA
SL1344_1433	ATGAACAATACGCTGAGCAAACGCCTGTGCCTGACGGCAATGCTTACGTTGGCGGCCGTTGTATATACTACTTCCGCATTCGCTGAAACCAGTAAACTGGTGATTGAATCGGGAGATAGCGCACAAAGTCGTCAGGAAGCGGCGATGGAAAAGGAACAATGGAACGACACTCGCAGTCTGCGTCAGAAAGTGAATACCCGCGCAGAAAAAGAGTGGGACAAAGCCGATGCCGCCTTTGATAACCGCGATAAATGCGAGCAAAGCGCCAACATCAACGCCTATTGGGAGCCCAATACGCTGCGGTGTCTGGATCGTCGTACAGGTCGCGTTATTACGCCCTGA	ATG	TGA
yihU	ATGGCAGTTATAGCATTTATCGGGTTGGGACAGATGGGCTCCCCTATGGCGAGCAATCTGCTAAAGCAGGGCCATCAACTCAGCGTCTTCGATGTTAATCCCGACGCCGTACAGCGTCTGGTAGACAAAGGCGCGCAACCTGCAAGCAGCCCGGCTCAGGCAACCATCGGCGCTGAATTTGTTATCACCATGCTCCCGAACGGCGATCTGGTTCGTTCCGTTTTGTTTGGCGAGCAAGGCGTTTGTGAAACTCTTTCCCGTGAAGCGCTGGTCATTGATATGTCCACTATTCATCCGTTGCAAACCGATAATCTGATTGCCGACATGCAGAGCAAAGGGTTCAGCATGATGGATGTGCCGGTAGGCCGGACATCCGACAACGCGATTACCGGCACATTG…	ATG	TAA
recE	ATGGAATTTTTCTATGTAGTAAAAGCTACGCAGAAATCCGGAAAGCAAGATGCGACGGTCTGGTTCACTGCAAAATCAGAAGCGCGCGCCAACCTTATGCTGGATGTCGTTCTGGAAGATGCTGAAATTGAAACCGGCCGCGGTAAGGATTATGCAAGGCCGATCCGCACCAATTTTCCGGTAGTCAACGAGCTGCCGCCGGAAGGTGAAATAAGTTTTACCTTCACTAATTATTATCGCCTCGGTGAAGATGGCATGACTTGGGAACAAATCCCCGGCGTCACCCTGCCATCATCTGAAGCCGCCGCCGCGGCGCGCCAGCATATCGTCGATGGTGTTGATACCGAAACAGGCGAAGTGCTGGAAGACCACACCGAAAATTTTGGTAACGAAAGCAAC…	ATG	TAA
glpD	ATGGAAACCAAAGATCTGATCGTGATAGGCGGGGGCATTAACGGTGCAGGCATCGCGGCTGATGCCGCCGGGCGCGGTTTGTCCGTACTCATGCTGGAAGCGCAGGATTTGGCCTGCGCAACCTCTTCCGCCAGTTCGAAACTTATCCACGGCGGCTTACGCTACCTTGAGCACTACGAGTTCCGTCTGGTCAGCGAAGCGCTGGCAGAACGTGAAGTGCTGTTGAAAATGGCGCCGCACATCGCCTTCCCGATGCGTTTTCGTCTGCCGCACCGCCCGCATTTACGTCCGGCCTGGATGATCCGTATCGGTCTGTTTATGTACGATCACCTCGGCAAACGTACCAGTTTACCCGGTTCCACCGGTGTGCGGTTTGGCGCAGATTCGGTGCTCAAACCG…	ATG	TAA
fliD	ATGGCTTCAATTTCATCATTAGGTGTGGGATCAAACTTACCGTTAGACCAGTTGTTGACAGACCTGACAAAGAACGAAAAAGGACGCTTAACGCCAATTACCAAACAGCAGAGCGCGAATTCGGCAAAGCTAACCGCCTATGGCACATTGAAAAGCGCATTAGAAAAATTCCAGACGGCAAATACCGCGTTAAATAAAGCGGATTTATTTAAGTCTACCGTGGCGTCCAGCACCACTGAAGATCTCAAAGTCAGTACTACCGCTGGCGCTGCCGCAGGGACTTATAAGATTAACGTAACCCAGCTTGCCGCCGCACAGTCGCTGGCGACAAAAACCACCTTCGCGACCACCAAAGAGCAGTTGGGCGATACGTCGGTCACGTCCCGGACAATTAAAATT…	ATG	TGA
gpsA	ATGAACCAAAGTAATGCGTCAATGACAGTCATCGGTGCCGGCTCGTACGGCACCGCTCTTGCCATCACTCTGGCGAGAAACGGCCACCAGGTTGTCCTGTGGGGCCACGACCCAAAACATATCGCGACCCTGGAGCACGATCGCTGCAACGTCGCGTTCCTTCCCGATGTGCCTTTTCCCGATACGTTACACCTGGAAAGCGACTTAGCAACCGCGCTGGCGGCCAGTCGTAACATTCTGGTGGTGGTGCCAAGCCATGTTTTCAGCGACGTGCTGCGGCAGATTAAACCGCTGATGCGTCCGGATGCGCGTCTGGTATGGGCGACCAAAGGCCTGGAAGCGGAAACGGGGCGCCTGTTGCAGGATGTCGCTCGCGAGGCGTTAGGCGATCAAATCCCG…	ATG	TAG
rpsB	ATGGCAACTGTTTCCATGCGCGACATGCTCAAGGCTGGTGTTCACTTTGGTCACCAGACCCGTTACTGGAACCCGAAAATGAAGCCTTTCATCTTCGGCGCGCGTAACAAAGTTCACATCATCAACCTTGAGAAAACTGTACCGATGTTCAACGAAGCTCTGGCTGAACTGAACAAGATCTCTGCTCGTAAAGGTAAAATCCTTTTCGTTGGTACTAAACGCGCTGCAAGCGAAGCGGTGAAAGAAGCTGCTAACAGCTGCGACCAGTTCTTCGTGAACCATCGCTGGCTGGGCGGTATGCTGACTAACTGGAAAACAGTTCGTCAGTCCATCAAACGTCTGAAAGACCTGGAAACTCAGTCTCAGGACGGTACTTTCGAAAAGCTGACCAAGAAAGAA…	ATG	TAA
SL1344_1195	ATGCTGAGCTGCCGCGACCTCGTTATTCGTCAGGGCGGGAAAGTCTTATGGCAGAACCTGACGTTTACGATTTCTGCCGGTGAACGGGTAGGAATTCATGCGCCAAGCGGAACGGGGAAAACAACGTTGGGGCGCGTCCTGGCCGGATGGCAAAAGCCGACGGCGGGCGACGTTCTGCTGGACGGCAGCCCGTTACCCCTGCATCAGTATTGTCCGGTACAGCTTGTCCCCCAGCATCCTGAACTGACGTTTAATCCCTGGCGAAGCGCCGGAGACGCTGTACGTGATGCCTGGCAGCCTGACCCGGAAACGATGAGGCGTTTGCATGTGCAGCCCGAGTGGCTGACGCGTCGGCCAATGCAGCTCTCAGGCGGGGAGTTGGCGCGTATTGCGATACTG…	ATG	TAG
sinH	ATGGTGCGAAGGATTCGCATTCTGGTTTTGCTATTAGTGTCTGGAGTCTCAGTTGCGGCTTCTGGCGCAGATAACTCTGCATCTGCAAATGATGAAAGCCACTCCTCCCTGCCTGATTTAGCCAGCGAATCCGCGAAAAAAGAAGAACAGGAAAATAAAGGAAAGTCCTTTAAAGAACAGGGCGCTGACTACTTTATTAATTCCGCCACCCAGGGCTTTGATAATCTCACCCCGGAAGCGCTGGAATCCCAGGCGCGTAGCTATTTGCAAAACCAAATCACTTCCTCAGCACAGTCATATCTTGAAGGTGTAATGTCACCTTATGGCAAGATCCGTACCAGCCTGTCCGTGGGCGAAGGCGGCGATCTGGACGGCAGTTCGCTGGATTATTTTATTCCC…	ATG	TAG
garD	ATGGCCAATATCGAAATTCGCCAGGAATCGCCATCGGCGTTTTATATAAAAGTACATGAAACCGATAATGTCGCAATTATTGTTAATGACCACGGTCTTAAAGCCGGAACACGTTTTCCGGATGGCCTGGAACTGACTGAACATATTCCGCAAGGCCATAAAGTTGCTCTGACGGATATCCCCGCTCACGGCGAAATCATCCGTTATGGCGAAGTCATCGGTTATGCGGTACGCGACATCCCGCGCGGAAGCTGGATCGACGAGTCGCTGGTTGAACTGCCAAAAGCGCCGCCGCTGAATACGCTACCGCTGGCGACCAAAGTACCGGAACCGCTGCCGCCGCTGGAAGGCTATACGTTTGAGGGCTATCGTAACGCCGATGGCAGCGTCGGCACCAAA…	ATG	TGA
sthB	ATGAAACACATAAAGAAATCCGTGTTGGCCGTATTACTGACAAGCCATGTTGCCCATGCCAGCATTGTTGTTGGCGGAACCCGACTGGTTTTCGACGGCAATAATGATGAGTCGTCAATCAATGTAGAGAATAAAGACAGCAAAGCGAATCTTGTTCAGTCATGGTTATCGGTTGCCGATCCCCAGGTCACAAATAAGCAGGCGTTTATTATCACCCCGCCTCTTTTTCGCCTTGATGCCGGGCAAAAGAACAGTATTCGGGTTATTCGCTCTGGCGCCCCCCTACCTGCAGATCGGGAGTCTATGTACTGGCTCAATATTAAGGGTATTCCTTCTATTGATGATAATGCCTCCGCGAACCGCGTGGAAATCTCCATTAATACCCAAATAAAGCTTATA…	ATG	TAG
hpaA	ATGTGCCAACGTGCGATCGCCAATATTGATATCAGCAAAGAGTATGACGAAAGCATGGGCAGTAACGATGTGCATTATCAGTCGTTTGCTCGTATGGCGGATTTCTTTGGTCGTGATATGCAGGCGCATCGCCACGACCAGTTTTTTCAAATGCACTTTCTTGATACCGGGCAGATTGAGCTACAGCTCGACGATCATCGCTATTCGGTGCAGGCGCCGCTATTTGTGCTTACGCCGCCCTCGGTGCCGCATGCTTTTATTACCGAATCGGATAGCGATGGCCATGTTCTGACGGTACGCGAAGAGCTGGTTTGGCCGCTGCTGGAAGTGCTTTATCCCGGCACCAGAGAGGCCTTTGGCCTGCCGGGAATCTGCCTGTCGCTGGCGGATAAACCCAAC…	ATG	TAA
bfr	ATGAAAGGTGATGTTAAAATCATAAATTATCTCAATAAACTATTGGGAAATGAGCTTGTCGCAATTAATCAGTATTTTCTTCATGCCCGTATGTTCAAAAACTGGGGGCTGACCCGGCTTAATGATGTTGAGTACCATGAATCCATTGATGAGATGAAACACGCTGATAAGTATATTGAGCGTATTTTATTTCTGGAAGGCATACCGAACCTACAGGATCTGGGCAAGCTGGGCATCGGTGAAGATGTCGAAGAGATGCTACGATCGGATCTCCGGCTCGAACTGGAAGGCGCAAAAGATCTACGTGAGGCAATAGCCTATGCCGATAGCGTTCATGATTATGTCAGCCGGGATATGATGATTGAAATTCTTGCCGACGAGGAAGGCCACATCGACTGG…	ATG	TAA
SL1344_2242	ATGAAAATTACGTCTATTGAAGTTTTTGACTGTGAATTAAAAAAAAGAGATCAAACGATGTCCTCCTATAATCCAGTACTTATCCGGGTGAATACCGACTCAGGATTAAGTGGTATTGGCGAAGTAGGACTGGCCTATGGCGCAGGCGCTAAAGCTGGCGTAGGGATCATCAGAGATCTGGCGCCATTGATTGTGGGTGAAGATCCACTAAATATCGAAAAAATTTGGGAGTTCTTTTTCAGAAAGACTTTTTGGGGGATGGGGGGCGGGAACGTTTTTTATGCCGGAATGAGCGCTATTGATATTGCTCTTTGGGATATCAAAGGTAAATATTTAGGTGTACCTGTTTATCAGCTCCTTGGCGGGAAAACTAATGAAAAATTAAGAACCTATGCTAGT…	ATG	TAG
SL1344_2984	ATGTTATTTGCATGGATAACCGATCCTAATGCCTGGCTGGCGCTCGGTACGCTGACGCTGCTGGAGATTGTACTTGGGATCGACAACATTATTTTTCTTTCTCTGGTGGTAGCAAAACTTCCCACGGCGCAACGAAACCACGCACGGCGGCTTGGGTTGGCGGCGGCGATGGTTATGCGCCTGGCGCTGCTGGCGTCAATCGCCTGGGTCACTCGGCTGACTAATCCGCTGTTTGAGCTTTTCGGCGAAGCGATTTCCGCCCGTGATCTCATTCTGTTACTGGGCGGGTTATTTTTAATCTGGAAAGCCAGCAAGGAGATCCATGAGTCCATCGAAGGCGAAGAAGAAGGGTTAAAAACCCGGGTTTCTTCTTTCCTGGGCGCAATAGTGCAGATTATG…	ATG	TAA
SL1344_4339	ATGAAAATTTTCCAACGCTACAACCCGCTACAGGTGGCGAAGTACGTGAAGATCCTGTTCCGTGGACGGTTATATATCAAGGATGTTGGCGCTTTTGAGTTCGATAAGGGTAAGATTCTTATCCCAAAAGTGAGAGACAAGCAGCACTTGTCTGTGATGTCTGAAGTTAACCGTCAGGTTATGCGTCTGCAAACTGAGATGGCGTAA	ATG	TAA
surA	ATGAAGAACTGGAAAACGCTGCTTCTCGGTATCGCCATGATCGCGAATACCAGTTTCGCTGCCCCCCAGGTAGTCGATAAAGTCGCAGCCGTCGTCAATAATGGCGTCGTGCTGGAAAGCGACGTTGATGGCTTAATGCAATCAGTCAAACTCAACGCGGGTCAGGCAGGTCAGCAGCTTCCGGACGACGCCACGCTGCGTCACCAGATCCTGGAACGTTTGATTATGGATCAAATTATCCTGCAGATGGGTCAGAAGATGGGGGTGAAGATCACGGATGAGCAGTTGGATCAGGCCATCGCCAACATCGCCAAACAAAACAATATGACGATGGATCAGATGCGCAGCCGTCTGGCTTACGATGGGCTGAACTATTCAACCTACCGTAACCAGATTCGT…	ATG	TAA
SL1344_0702	TTGATGAAGTGTACAGCGCTAATCGTAACTTTTAACCGTCTTGAAAAATTAAAAAAAAGTGTGCGAGAGACTGTTAAGGCGGGTTTTTCCTCTATTGTTATCGTTAATAATGGCTCAAGCGACGGTACCAGGGAATGGCTTTCTTCATTAAGTGAACCTGGCATCACGATACTTAATCTTAAAGATAATCTTGGTGGTGCTGGCGGATTTAAAGTAGGTAGTCAATATATATGCTCATATAGTAATGCCGATTGGGTATTTTTCTATGATGATGATGCTTACCCGGAAATTAATATTTTAAAGCATTTCTCGTTATTAGATACCTCAAGATACCGTATATTTGCGTCGCGAGTTCAGGACACCTATGGGCGGTCTTGTCGGATGAATTTGCCTTTCATT…	TTG	TAG
SL1344_1672	TTGACTACGCGCTCAGGTCGCCGTTTTGAAGGGTTATGCGCGCTGTTTGCGCTGCTTAGCGTACTGGTCATTTTTGTTGAATCAGGCGTAGGAACGGAATATCACCTGACATTTGATGAATGGCATATTTTTGTCTGGCTGGAGCTCTGCGTTACCCTGATATTTACCGGTGAATACTTGCTCAGACTGTTTAGCTGGCCCGAACCGGCAAAATACGTTTTTAGTTTCTGGGGATTTATTGATCTGGTGACGATTTTGCCGCTGTACGTCATGTGGCTGTGGCCGGAAATTAGCCTGAACTATATGTTTGCCTGGCGCGCTATGCGAGCGATTCGCGTGCTGCGTATTCTTAAACTGCTACGCTTTATGCCATCGCTGCGGGTATTCTGGAGCGCCATT…	TTG	TAA
SL1344_P2_0018	ATGATATTTCAGCATGATAGCAGCAATAAAATAGATTGCAGCTATCATGCTGTACACATACGGCCTAGCGCTCTGTTTATGTTATGCTATCTGCAATCTTGCGGCAATCTTGCTTCATCTGTCGATGCGATTCTGAATGAGGTTTCTTTTATTGTTAACGTGACACAAGTATTCGGCTGTCAATTCCAGCACTCTGCTAAGTAG	ATG	TAG
cbiB	ATGACGATTCTTGCCTGGTGTATCGCCTGGGTGCTGGATTTTATCATCGGCGACCCTCAACACTGGCCCCATCCGGTACGCTGGATAGGTCGTTTAATCACGTTTGTGCAGCGTATTGTGCGTCGCTATTGTCCCGGCGATAAAGCGCTGCGGATTGGCGGCGGCGTAATGTGGGTTGTGGTTGTCGGGGCGACCTGGGGCGTGGCATGGGGCGTACTGGCGCTGGCGCAGCGGATTCACCCCTGGTTTGGCTGGAGCGTCGAAGTCTGGATGATCTTTACCACGCTGGCCGGACGCTCTCTGGCCCACGCCGCGCAGGAGGTTGAACGACCGTTACGGAAGAACGACCTTGCGGAAAGCCGAATAAAACTCTCCTGGATCGTCGGGCGCGATACGTCG…	ATG	TGA
SL1344_0459	ATGAAACTCGTGCACATCGTAAGTGGTTTAGCGGTTGCGATATCTCTGGCGGCCTGCGCTGATAAAAGCGCTGATATCCAGACGCCTGCGCCAAACCCTAACATGTCGATTACAGCTAACCAGTCTACTATTCAGCAACCCAATGTTTCCGGTACCGTCTGGATCCGCCAGAAGGTCGCTCTGCCGCCAGATGCGGTGCTGACCGTGACGCTTTCAGATGCTTCGCTGGCTGATGCGCCGTCTAAGGTGCTGTCGCAAAAAGCGGTACGTACCGAAGGTAAACAGGCGCCTTTCAGTTTTGTGTTGCCGTTTAACCCATCAGATATTCAACCTAACGCGCGCATCCTCCTGAGCGCGGCCATCACCGTTGATAATAAGCTGGTATTTATTACCGATAGC…	ATG	TAA
SL1344_2744	ATGTCGCGACTGGCGCAGGATATGAAAAAACTGGCGCACCGCGCAGGTGGCAGCCACAAAACCGTCCACGACCGCGAACAGATGGCGCAGCGTTTTGCCCGTCATTTGCTGGCGCAGAATATTCAGGTCACCAGCACCTGCCAGCTCAAAGCCAGACACATCGCGGGATATATTCATGAATGGCTGGCGCAGGGTATTTCTCTGCGAACGCTACAGAATGAGATGGCAATGGTGCGCTCTATTCTGGCTGAAGCCGGACGCACACAACTCAGCCAGTCAGAATTAATCAGCAACCAGTCGCTCGGTATCAGTGGTGCCAGCTGTGACGGGACGCACCGGGCCATTCCGGATGCACTTTACCATCAGGTACTGGACCGGGTTCATCATATCGACGCAGGC…	ATG	TGA
speG	ATGACAAGTGACTACAAGGTCAGACTGCGCCCGCTTGAGCGTGAAGATTTACGATTTGTCCACCAGCTTGATAATAATGCCAGCGTTATGCGTTACTGGTTTGAAGAGCCGTATGAGGCTTTTGTCGAACTGTCGGATCTCTACGACAAACACATCCACGACCAAAGCGAACGGCGCTTTGTCGTCGAATGCGACGGTGAAAACGCCGGGCTGGTAGAACTGGTGGAAATTAACCATGTGCATCGGCGGGCGGAATTTCAGATTATTATCTCGCCGGAGTACCAGGGAAAAGGCCTGGCGTCACGCGCGGCCAAACTGGCGATGGATTACGGATTTACCGTACTCAATCTCTATAAATTGTATTTGATCGTCGATAAAGAGAATGAAAAAGCGATTCAC…	ATG	TAA
yihT	ATGAACAACTACACCATCAAAGACATTACGCGAGCGTCCGGCGGGTTTGCCATGCTGGCTGTCGATCAGCGCGAGGCGATGCGTTTAATGTTTGCTGCTGCTGGTGCGAAAACACCCGTTGCCGATAGCGTGCTGACGGATTTCAAAGTGAATGCGGCGAAAATTCTTTCCCCGTATGCCTCTGCCGTTCTGCTGGATCAGCAGTTCTGTTATCGCCAGGCCGTAGAACAAAACGCGGTCGCTAAAAGCTGCGCCATGATCGTCGCGGCGGATGATTTCATCCCGGGCAACGGTATTCCCGTTGATAACGTGGTCCTTGATAAAAAAATTAATGCGCAGGCGGTAAAACGGGACGGCGCGAAAGCCTTAAAACTGTTGGTGCTGTGGCGCAGCGACGAA…	ATG	TAA
SL1344_2595	ATGGATCGTGACGAGCTGGAAGAAGACCGTGCAGCATTCATTGCGGGTGAGATTGGCGGCGCAGTGGTCGAATTGATAATCGACGGCGTAGTGATCAGCCGCGATGCGATTGTAGATAGTCTGGAGGCTAAGCGCAGAGCAGTGGGAAACGTCATTCACAAGGGTGTATTGCGGGATGCGGCCGCTATGGTAAGAAAAGGGCAATAA	ATG	TAA
fliC	ATGGCACAAGTCATTAATACAAACAGCCTGTCGCTGTTGACCCAGAATAACCTGAACAAATCCCAGTCCGCTCTGGGCACCGCTATCGAGCGTCTGTCTTCCGGTCTGCGTATCAACAGCGCGAAAGACGATGCGGCAGGTCAGGCGATTGCTAACCGTTTTACCGCGAACATCAAAGGTCTGACTCAGGCTTCCCGTAACGCTAACGACGGTATCTCCATTGCGCAGACCACTGAAGGCGCGCTGAACGAAATCAACAACAACCTGCAGCGTGTGCGTGAACTGGCGGTTCAGTCTGCTAACAGCACCAACTCCCAGTCTGACCTCGACTCCATCCAGGCTGAAATCACCCAGCGCCTGAACGAAATCGACCGTGTATCCGGCCAGACTCAGTTCAAC…	ATG	TAA
cysE	ATGCCGTGTGAAGAACTGGAAATCGTCTGGAAGAATATTAAAGCTGAAGCCCGCGCTTTAGCTGACTGTGAGCCTATGTTGGCCAGTTTTTATCACGCCACGCTACTCAAGCATGAAAATCTGGGCAGTGCGCTGAGCTATATGCTGGCAAATAAACTGGCTTCGCCCATCATGCCCGCTATCGCTATCCGTGAAGTAGTTGAAGAAGCCTATGCCGCCGACCCGGAAATGATCGCGTCGGCAGCCTGCGATATTCAGGCCGTGCGCACTCGCGATCCGGCGGTGGATAAATACTCCACGCCGCTGTTATATCTGAAAGGCTTTCATGCGCTACAGGCCTACCGCATTGGTCACTGGTTGTGGAATAAAGGTCGCCGCGCGCTGGCTATCTTCCTGCAA…	ATG	TGA
map	ATGGCTATCTCTATCAAGACATCTGAAGACATCGAAAAAATGCGCGTCGCGGGCCGTCTGGCAGCCGAAGTGCTGGAAATGATCGAACCGTATATCAAACCGGGCGTCACCACCGGCGAACTGGACCGTATCTGTAACGATTACATCGTTAACGAACAACACGCGATCTCCGCCTGCCTCGGCTATCACGGTTATCCGAAATCCGTCTGTATCTCTATTAATGAAGTGGTGTGCCACGGCATTCCGGATGACGCTAAACATCTGAAAGATGGTGATATCGTCAACATCGACGTGACCGTGATTAAAGATGAATTCCACGGCGATACCTCGAAGATGTTTATCGTCGGCAAACCGACCATTCTCGGCGAGCGTCTGTGCCGCGTCACGCAAGAGAGCCTG…	ATG	TAA
SL1344_1194	ATGCTGAGTTTACAACAGGTTACGCTGGAAAGCGCGCGTTATCGCTGGTATGGCGCGAGACGCTGGTCGCCGTTATTACAGAATGTCTCTTTTGATATCGCGCCCGGCGAAATGGTGGCATTGGTTGGCGGCAGCGGGGAGGGCAAAAGTCTGCTGCTGCAATGCCTGCTCGATCTGCTGCCGGAAAATTTACGCTTTCGGGGGGAGATTACGCTTGATGGCAACCGGCTGGACAGACATACCATCAGGCAGCTTAGGGGCAATACGTTTAGCTACGTGCCGCAGGGGGTACAGGCGCTTAATCCCATGCTGAATATCAGAAAACATTTGAACAGAGCATGTCATCTGACCGGACGCGCCTGGGATGAGACGCAAATGGTACAGCTATTACAGCAAAGC…	ATG	TGA
sinI	ATGCAAGCAACAGTAAAACGGCGGCTGACGAAGGTCGCTTTAGCATTAGTAGTTGCCGGGTATTGCGCCGCGCCAGCGGTGGCGGCAAACGGTAATCTGAAATCGGGGCAGTGGCAGATTGTCTCTGAACAGACGGGCACCATTCAGGGTACGGTGCCGTGGATTACCCGTGCGGCGGATAAAACTGCGGATACCGACAAAGATCACGTAACGGTAACTATCGATCGCGGCGATCGTAAAATTGTGACCGAAGGCGATAAGCAGTTCCACGTTGGCGATAAGGTCACGGTGAACTGGGCGATTGGCGATACGGAAGGCGACCTGGACACCGACAACACGGCAACTAAAGCCACCGTGAAATGGGTGAGCTTTAGCGATCAGAATGGCAGCGACCCCAAA…	ATG	TAA
garL	GTGCAGATTGGCTGCTGGTCTGCACTGGCAAGCCCAATCACCACCGAAGTTCTCGGTCTGGCGGGATTTGACTGGCTGGTGCTGGATGGCGAACATGCGCCGAACGATGTGACCACCTTAATTCCGCAGCTAATGGCATTGAAAGGCAGCGCCAGCGCGCCTGTGGTACGTGTGCCAACCAATGAACCGGTCATTATCAAACGGATGCTGGATATTGGGTTTTATAACTTCCTGATCCCCTTTGTTGAAACGCAAGAGGAAGCGGCTCGCGCCGTCGCCTCGACGCGTTACCCGCCGGAAGGCATTCGCGGCGTCTCCGTTTCTCACCGCGCGAATATGTTCGGTACGGTGCCTGATTACTTTGCGCAGTCGAACAAAAACATCACCATTATTGTTCAA…	GTG	TAA
hpaX	ATGAGCGACACATCATCTGCACTTCCGGAAAGCCCCGAGTCTGTCAGTTCGCACAACGCGCTCAGCACGGGTCAACAAACCGTCATAAATAAACTGTTCCGCCGACTGATCGTATTTTTATTCGTGTTGTTTATCTTCTCGTTTTTAGACCGTATCAACATCGGTTTTGCCGGGTTGACGATGGGGCAGGATCTGGGGTTAAGCGCCACCATGTTTGGTCTTGCCACGACGCTGTTTTACGCTACCTACGTCATTTTCGGCATTCCCAGCAACGTGATGTTGAGCATCGTCGGCGCCCGCCACTGGATTGCGACCATTATGGTGCTATGGGGCATTGCATCTACCGCCACGATGTTCGCGGTGGGACCGAAAAGCCTGTATGTGCTGCGAATGCTGGTG…	ATG	TGA
gyrA	ATGAGCGACCTTGCGAGAGAAATTACACCGGTCAACATTGAGGAGGAGCTGAAGAGCTCCTATCTGGATTATGCGATGTCGGTCATTGTTGGCCGTGCGCTGCCGGATGTCCGAGATGGCCTGAAGCCGGTACACCGTCGCGTACTTTACGCCATGAACGTATTGGGCAATGACTGGAACAAAGCCTATAAAAAATCTGCCCGTGTCGTTGGTGACGTAATCGGTAAATACCATCCCCACGGCGATTCCGCAGTGTATGACACCATCGTTCGTATGGCGCAGCCATTCTCGCTGCGTTACATGCTGGTGGATGGTCAGGGTAACTTCGGTTCTATTGACGGCGACTCCGCGGCGGCAATGCGTTATACGGAGATCCGTCTGGCGAAAATCGCCCACGAA…	ATG	TAA
yihS	ATGAAATGGTTTAACACGTTGAGCCACAACCGCTGGCTGGAGCAGGAAACCGACCGCATCTTTAATTTCGGTAAAAACGCCGTGGTGCCGACAGGCTTCGGCTGGCTGGGAAATAAAGGGCAAATCAAAGAAGAGATGGGCACCCATCTTTGGATCACGGCGCGTATGCTGCACGTTTATTCCGTGGCGGCGTCGATGGGCCGACCGGGCGCTTATGATCTGGTCGATCACGGCATCAAAGCCATGAACGGCGCGCTGCGCGATAAAAAATACGGCGGCTGGTATGCCTGCGTTAACGATCAGGGCGTGGTAGATGCCTCTAAACAGGGTTATCAACACTTCTTCGCCTTGCTGGGCGCGGCCAGCGCCGTCACGACCGGGCATCCTGAAGCCAGGAAA…	ATG	TAG
mutH	ATGTCCGCTCTTTGTCCGCTACTGACTCCGCCTGCTTCGGAAGCATTGCTGTTAGCCCAGGCGCGGCAGCTTTCCGGCTATACGTTAGGCGAGCTGGCGGCGATGGCCGGCATTACCACGCCTAAAGATTTGAAGCGAGACAAAGGCTGGATCGGTGTCTTGCTGGAGATCTGGCTCGGCGCCAGCGCCGGGAGCAAGCCGGAGCAGGATTTCGCCGCGTTAGGCGTAGAACTGAAAACCATCCCGGTGGATAGTCTGGGTCGTCCTCTGGAAACAACCTTTGTTTGCGTGGCGCCGTTAACCGGTAACAGCGGCGTGACCTGGGAGACAAGTCACGTACGGCATAAATTGAAGCGCGTGCTATGGGTGCCGGTCGAAGGCGATCGCAGCATACCGTTA…	ATG	TAA
ytfJ	ATGACCTTACGTAAAATTCTGGCGATGTCGTGTCTGCTACTCCCCATAATGGCTTGTGCGCATAACCTTGAAGTTAACCAACGGGTGCCGCCGGTAGGCATTGCCGACCGTGGCGAACTGACGTTGAATAAAGATGAGTTTAGTTATAAAAACTGGAATAGCGCGCAGCTGGCGGGAAAAGTGCGCGTCCTGCTGCACATTGCGGGTCGAACGTCAGCGAAGGAAAAAAACGCCACGCTGATTGAAGCGATTAAATCAGCCAAGCTCCCGCATGACAGATACCAGACGACCACAATTGTGAACACCGATGATGCGATCCCAGGCTCCGGTATGTTCGTGCGTAGCAGTATAGAAAGTAATAAAAAGCTCTACCCGTGGTCGCAATTTATTGTCGACAGC…	ATG	TAG
pdxA	ATGAGCAGTGCGCAACGCGTTGTTATCACTCCCGGCGAACCCGCCGGGATTGGCCCCGATCTTGTCGTCCAACTGGCGCAACGCGCGTGGCCGATTGAACTGGTCGTCTGTGCGGACGGCGCGCTCCTGACGGAGCGGGCCGCCATGCTCGGCCTGCCTCTCTCGCTTCTCCCTTACTCGCCTGATGTCCCCGCTGCGCCGCAGCCCGCGGGAACGCTGACCCTATTGCCGGTCTCGCTGCGCGCGCCTGCCATCTCCGGTCAGTTGACGGTAGAAAATGGCCCCTACGTGGTAGAGACGCTGGCGCGAGCGTGTGATGGCTGTCTGAACGGTGAATTTGCCGCGCTGATCACAGGCCCCGTGCACAAAGGCGTTATTAACGACGCAGGCATTTCGTTT…	ATG	TGA
SL1344_0699	ATGCAGACGTTAACCAGAGTACTGCCGCCTCTCCGGCTGATTATGTTTTGTCAGTCAGGCGAAAATCCTACGCAGTTTCCGGATACCGGCGGCCTTTGCGTGGAGGACTGCGTTCGTCTCAGGACACCAGAAGGGCTGCTGGATCGGTTGCGTCGGTGGCCCGGCGCGATGGTGATATCCGCCGGACGGCCATCAACCCAGCTTCTGCTGTGGCAACAGGTTTTTCTGCGTTATCCGCGGACAGTGGTTTTTTGCAGCAGTAACGCGTTTTTACCGGTTGACGTCAGCGTGGAAGGTTACTTCCGCCATCTGAGGCTGATTAAACGCGCCATGTCGGTAAGGGTTCTGGCCAGAATGGCTGAGCTTGCCATATGGTCATCACTACAGACATCGCCTTAC…	ATG	TGA
SL1344_4159	GTGGTTATTTTGCCCCTCTGGAGAAGCGTCGTGAAGCGACTCGCACTTATCCTGATTTGCCTGCTATTACAGGCGTGTTCGGCCACCACCAAAGGCCTGGGCGATTCACTGTGGGACAGTTTGTTCGGTACGCCAGGCGTACAGCTAACGGATGACGATATTCAAAACATGCCTTATGCCAGCCAGTACATGCAGCTTAACGGCGGTCCTCAACTGTTTATGGTGCTCGCTTTCTCGGAAAACGGGCAGCAGAAATGGGTGACGCAGGATGGCGCGACGATCGTGACGCAGCATGGCCGTCTGGTCAAAACTCTGCTCGGCGGCGACAACCTGATCGATGTGAATAATCTGGCGACCGACCCGCTGGCGAAACCAGGACAGATTATCGATGGCGCGACC…	GTG	TGA
SL1344_1671	ATGGAAATGGATCTGAACAATCGCCTGACTGAAGACGAAACGCTTGAGCAGGCTTACGATATTTTTCTTGAGCTGGCGGCGGATAATCTTGATCCGGCTGATATCATTCTGTTCAATTTGCAATTCGAGGAGCGCGGCGGCGCGGAGTTGTTTGATCCCGCTGAAGACTGGCAAGAGCACATCGATTTTGACCTGAATCCAGACTTTTTTGCCGAGGTGGTAATTGGCCTGGCGGATACCGAAGACGGCGAAATTAACGACATTTTTGCCCGCGTTCTGCTGTGCCGGGAAAAGGACCACAAGCTGTGCCATATTCTCTGGCGCGAATAA	ATG	TAA
resA	ATGCAGCACCTGCCGGCACCGATCCACCATGCCCGGGATGCTGCTCAGCTTCCTGTTGCCATCGATTATCCGGCAGCGCTGGCACTCCGCCAGATGTCGATGGTTCATGATGAACTGCCAAAATACCTGCTGGCCCCTGAAGTGAGCGCCCTGCTCCATTACGTGCCGGATCTGCGCCGCAAAATGCTGCTGGCCACACTGTGGAACACCGGTGCGCGCATTAATGAAGCACTGGCGCTGACGCGGGGGGATTTTTCGCTTGCGCCTCCGTATCCGTTTGTGCAGTTGGCCACTCTGAAGCAGCGGACCGAAAAAGCCGCCAGGACGGCAGGAAGAATGCCCGCCGGTCAGCAGACTCACCGGCTGGTTCCGCTCTCTGACGCCTGGTACGTCAGCCAG…	ATG	TAA
mreB	ATGTTGAAAAAATTTCGTGGCATGTTTTCCAATGACCTGTCCATTGACCTGGGTACCGCGAATACCCTCATTTATGTAAAAGGACAAGGCATCGTATTGAATGAGCCTTCCGTTGTGGCCATTCGTCAGGATCGTGCCGGTTCGCCGAAAAGCGTGGCTGCAGTCGGTCATGATGCGAAGCAGATGCTGGGCCGTACGCCGGGCAATATCGCTGCGATCCGTCCGATGAAAGACGGCGTTATCGCTGACTTCTTTGTGACCGAAAAAATGCTCCAGCACTTTATTAAACAAGTGCACAGCAACAGCTTTATGCGCCCAAGCCCGCGCGTACTGGTATGCGTGCCGGTCGGCGCGACGCAGGTAGAACGCCGCGCAATTCGTGAATCCGCTCAGGGCGCA…	ATG	TAG
cbiC	ATGCATTATATCCAGCAGCCCCAAACCATTGAGGCCAACAGTTTCACCATTATTAGCGACATTATTCGCGAAACGCGTCCTGATTACCGTTTCGCCAGTCCGCTCCATGAGGCCATTATCAAGCGGGTTATTCATACCACCGCCGATTTCGACTGGCTGGACATTTTGTGGTTCTCTGCCGATGCGCTGGAGCAGCTTTGTGATGCGTTACGCCATCCGTGCATTATTTATACCGATACCACGATGGCGCTGTCCGGCATTAATAAAAGATTACTGGCGACGTTTGGCGGCGAGTGTCGCTGTTATATCAGCGATCCGCGCGTGGTGCGCGCCGCACAAACGCAGGGGATTACCCGTTCAATGGCCGCCGTCGATATCGCTATCGCCGAGGAGGAGAAA…	ATG	TGA
tesB	ATGAGTCAGACACTGAATAATTTGCTGACATTATTGAATCTGGAAAAAATTGAAGAAGGACTCTTTCGGGGCCAAAGTGAAGACTTAGGGCTGCGCCAGGTATTTGGCGGTCAGGTGGTGGGCCAGGCGCTCTATGCCGCCAAAGAAACGGTGCCGGAAGCGCGACTGGTGCATTCATTCCACAGTTATTTTCTGCGGCCAGGCGACAGCCAAAAACCCATTATCTATGACGTAGAAGTGCTGCGCGATGGGAATAGCTTCAGCGCCCGCCGCGTTGCCGCTATTCAGAACGGGAAACCCATCTTTTACATGACCGCCTCATTCCAGGCGCCGGAACCGGGTTTTGAACATCAAAAAACCATGCCGACGGTAGTCGGGCCGGAAGGACTACCGTCAGAA…	ATG	TAA
SL1344_2743	ATGAGTATCTTCGAGGCGCATTTTCGCAGGCTGCACGCCCGCTACGGCGCAGGTCAGACGCACGAATTACAGATGCAGGAGATCGCCGCCATCTTCGGCTGTTCGGTGCGTAATTGTCGTATTGCGCTAAAAAAGATGCATCAGGAAAAATGGCTCGACTGGCAGCCCCAGCGCGGGCGCGGCAAGCGCTCACGGCTCCATCTGTTAACCTCGCCGGAAAAGCTGTTCAGCCAGAACGTCAATAAGCTGCTGGAGAAGCAGGATTACGGCAACGTGCTGCGGTTTATCGGCAACGACAAGTATCTGCTGGATCGCCTGAGCCTGTGGCGCTTTGGGGTACAGGATAAAAGCAGCGAAACGCGGGTACGCATCCCCTACTATCGCAATCTGGATCCGCTT…	ATG	TAA
SL1344_1431	GTGATACGTGTGAAGAAACCCCTTTTACTGACGTTATTGTGCATGATACTGGCAGGTTGTGATAACCCGAAATCCCTTGAGTCTTTTACGCCGGAAATGGCCAGTTTTTCGAACGAATTTGATTTTGATCCATTACGTGGTCCGGTAAAGGATTTCAGCCAGACATTGATGAGTGAGAATGGCGAAGTGGCGAAGCAGGTCACCGGTACGCTTTCACAGGAAGGCTGTTTTGATACGCTTGAGTTACACGATCTGGAGAATAATACGGGGCTGGCACTCGTGCTGGATGCCAATTATTACCGGGATGCTCAGACGCTGGAAAAAAAGGTGCAGTTACAGGGGAAGTGCCAGCTGGCGGCGTTGCCTTCGGCGGGCGTGACCTGGGAAACGGACGACAAC…	GTG	TAA
SL1344_2594	ATGGATAATGGACGTGTTGAAGCTACTGATAGGCCAACAGAAATGATTGCCAGCAATACAAAATACCTAGTTTGGAACAACAAAGGGGGCGTGGGAAAAACTTTCCTGACGTACAACCTTGCAGTGGAGTTCGCAATTTCCCATCCAGACCAAGATGTTGTGGTTATCGACGCTTGTCCGCAATCAAACGTTTCTGAAATTATCCTTGGAGGCAATGGTACTGGTGAAGAAAACCTAAACTACCTTCGTGATAGGAATGTGACTATAGCTGGCTATATCAAAGAACGATTCAGTAAATCTCCGTTATCTCGTTTAGGAAATGAATCCTCTTACTTCGTTCGAGCACATACTGTTAACTCGAAGATGCCTGAGAATTTATACATCCTTCCAGGTGATGTC…	ATG	TAA
fliB	ATGAAAGAAATCACCGTCACTGAACCTGCCTTTGTCACCCGCTTTTCCTGTTCTGGCTCGGCCTGTCGCGACCACTGTTGTAAGGGCTGGAAAATCACGCTGGATAAGACGACGGTTAAAAAATATCTCGCCAGTAAAGACACGACGATTCGTACCATCGCGCAAGACCATATTATCCTGCTGAAAAAGAACAACAGCCACTGGGGCGAAATTAAGCTGCCTTCGGCGCTGGGGAATTGCCCTTATCTGGATGAGGACCGTCTGTGCCGGGTACAAAAAACGTTAGGCGCAAAGGCATTAAGTCATACCTGTTCCTCTTTCCCGCGGGCGCATCATACCTATAAAAATGAGGTGCGTAACTCTCTGAGTCTTGCCTGCCCGGAGGTGACGTCCCGCATT…	ATG	TAG
SL1344_3664	GTGATTCTTGCCAATACTCAGTCGTTCGACTTTGCCATTTTATACGTTGGCTCGATGGGACTTATTGGTCTCATTTCATATCTGTTTATCGTCGGCCCGCTGGATCGCATCACGCTGACATCATCCGCAGCCTGA	GTG	TGA
glnD	ATGAATACTCTTCCTGAACAGCACGCGAATACCGCACTCCCCACCCTCCCTGACCAGCCGCAAAACCCTGGCGTCTGGCCGCGCGCTGAACTGACCGTCGCCGGTATCAAAGCCCGCATCGACATCTTTCAACACTGGCTGGGAGAGGCATTTGACAGCGGCATTTGTGCTGAACAGCTTATTGAAGCCCGAACCGAATTTATCGACCAGTTATTGCAACGCCTGTGGATTGAGGCCGGTTTCGGTCAGATTGCCGATCTGGCGCTGGTCGCTGTCGGCGGCTATGGACGCGGCGAACTGCATCCGCTTTCCGATATTGATCTGCTCATTTTAAGCCGCAAAAAGCTGCCCGATGAACAGGCGCAAAAGGTCGGCGAGCTGCTGACTTTATTATGGGAC…	ATG	TAG
SL1344_1193	ATGCTCTATAATCCTGCCCCGACGTTGTTTCGTCTGCTCCTCTCCGTTACCTGTCTGCTGTTTATTGCCGGATACGGTTATGCCACGTTGAGCCAGCCGCCAGAGGTTAATCTGCTTGCCCGGCATCTGTCGCCTGATATCCAGCACTGGTTTGGCACCGATAATCTGGGGCGTGATGTATGGCTTCGTTGCTTTCAGGGGGCCTTCACCAGTTTACAAATTGGCGTTGGCGCCGCGCTGTGCAGCGGCGTTATCGCGTTAGTGATGGCGGCAGTGGCGCGCATTCATCCCCGGCTGGACCTCCTGGTGCGGCTGATAACCGATGCTATGCTCGCCATGCCGCATTTACTTTTGCTGATCCTTATCTGTTTTACGCTCGGCGGCGGTAAAAGCGGCGTC…	ATG	TGA
ratA	ATGGACAGGAATCGGCAAGTGAATAAAGTTGTACATTTCTTACTGACATTACTGATCATGTTTGCAGTGTCGATCGCACCTGCGCAGGCGCTATTGAAGGGCGGAACCTGGCAAGAGCTGAACTCAGTCACCGGTGCGGTTAACGGCACCGCGCCGCTGGCCGACGGCGCTATTATCCCCCTTTACCAGGGAAGTACGCTGCTTGACCCGAGCAAAACCCACGATATTGAATTCAGCGCCATGCCGCGCGATTTTAGCGCGGATGCTACCTCAACCTCGATGCGGGCGGTCAATTCCACCGATACCGAAGGCGATCTCTTTAGCGATCCGCCCACCATCGCCTGGGAAAACCGCCAGCCGCCCGCCATGGGCCTGGTATGGGCCGATGCCGCCACGCCC…	ATG	TAG
garR	ATGACGATGAAAGTTGGCTTTATTGGCTTAGGCATCATGGGTAAGCCCATGAGCAAAAACTTACTAAAAGCAGGGTATTCGCTGGTGGTGTCCGATCGTAATCCTGAAGCGATTGCTGACGTCATTGCCGCAGGCGCGGAAACGGCCTCTACGGCGAAGGCGATCGCTGAACAGTGTGACGTCATCATCACGATGCTGCCTAACTCTCCGCATGTGAAAGAGGTTGCGCTGGGCGAGAACGGTATCATCGAAGGCGCGAAGCCAGGAACCGTATTGATTGATATGAGTTCTATCGCGCCGCTGGCAAGCCGTGAAATCAGCGATGCGCTGAAGGCGAAGGGCGTTGAGATGTTGGATGCGCCGGTCAGCGGCGGCGAGCCGAAGGCGATTGATGGCACG…	ATG	TAA
SL1344_4520	GTGCAATTCTCCAGAGTAGAGCCCCGTTCTCAATTAGCGTTATCGTTTCTCTTTATATGCTGTTCCATAAAACCAGCGTTAGCGCATGATCATTTTAATCCATTATCGTTGGAAAATGATGAACCGGGCGTGGAGAATGTCGATCTATCGGTTTTCGAAAAGGGGGGGCAGGCAGAAGGCACCTATAATGTTGATATTTATATTAATAACACCAGTGTTGAAACAAAAAATATTGCCTTTAAAAATAAAAAATCAGCAGATAATAAGCTCTCCCTACAGCCGTGTCTTAGCGTTGAACAACTCAAGCAGTGGGGCGTAAAAACAGAAAACTTCCCCGAGCTTAAAAATGACCCAAACGGGTGTACCGATCTTAGTCTGCTGGCTGGCGCTGTAGCAAAG…	GTG	TGA
hpaI	ATGAAAAATGCTTTCAAAGACGCGTTAAAAGCGGGGCGTCCGCAAATCGGTTTGTGGCTGGGGCTTGCCAACAGTTACAGCGCTGAACTGTTAGCGGGCGCCGGCTTCGACTGGCTACTGATCGACGGTGAACACGCGCCAAACAACGTGCAGACGGTGTTGACCCAGTTGCAGGCGATTGCGCCTTATCCCAGCCAGCCGGTGGTGCGTCCGTCATGGAACGATCCGGTACAGATTAAGCAACTGCTCGACGTCGGCGCGCAAACGCTGCTGATACCGATGGTGCAGAATGCCGATGAAGCGCGAAACGCCGTGGCGGCTACGCGTTATCCGCCTGCCGGTATTCGCGGCGTGGGCAGCGCGCTGGCGCGGGCATCGCGCTGGAACCGCATTCCGGAG…	ATG	TAA
hopD	ATGTTTGTTGCCCTCCCCTTTCTCATTTTTTATGCGTCGTTCTCTTTATTACTTGGCATATACGACGCGCGTACCGGTCTGCTGCCTGACCGGTTTACTTGTCCATTGCTGTGGGGTGGTCTGCTTTATCACCAGATTTGCCTGCCGGAGCGTTTACCGGATGCGCTTTGGGGCGCTATCGCCGGCTATGGCGGATTCGCGTTAATTTACTGGGGCTATCGCCTGCGTTATCAGAAAGAGGGGCTTGGATATGGCGACGTCAAGTACCTCGCTGCCTTAGGGGCGTGGCATTGTTGGGAAACACTGCCGTTACTGGTTTTCCTTGCCGCTATGTTGGCCTGTGGCGGGTTTGGCGTCGCGCTACTGGTGAGAGGTAAATCGGCATTAATAAACCCGCTA…	ATG	TAA
rcsC	TTGAAATACCTTGCTTCCTTTCGAACTACGCTGAAAGTCTCGCGCTACTTATTCAGAGCGTTAGCGTTACTCATTTGGCTCTTAATCGCCTTTGTTTCGGTGTTTTACATCGTCAATGCCCTGCACCAGCGGGAGTCTGAAATTCGTCAGGAGTTCAACCTTAGCTCCGATCAGGCGCAGCGTTTTATCCAGCGCACGTCGGATGTGATGAAAGAGCTCAAATATATCGCCGAGAACCGTTTAACGGCGGAAAACGGCGTCATGTCGTCGCGTGCGCGTGATGACAAAATGGTGGTGCCGGACTTTGAACCGCTATTTGCCGACTCAGACTGTGCGGCGATGGGCTCCGCCTGGCGCGGATCGCTGGAGTCGCTGGCCTGGTTTATGCGTTACTGGCGC…	TTG	TAA
SL1344_3966	ATGGCAGCCATGCACAGCGGTGGAAAAACTATTCAGCTTAATGCGGGCCATTACCAGGCGAAAATCGTCACGGTTGGCGCAGGTCTGGCGGAACTGACCCATCATGGACGCCATGTGGTCATCCCGCATAAACCGGAAGAAATACCCATGGCGCATCTGGGGAAAGTATTGATTCCCTGGCCAAATCGCGTGACAAATGGCTGCTACTCCTATAACGGCAAGGTTTTCCAGCTTGCCGTTAACGACCCGGTTTCGCAGACCGCCATTCACGGTCTGTTAGCCTGGCGAGACTGGCAGATTAATTATCAGTCGGCGACGGAAGCGTCGCTAACGATTTTTCTGCCGCCCTCTTACGGCTATCCCTTTGCGTTGATATCGGAAGTGATTTATCGGTTAGAT…	ATG	TAG
rppH	GTGATTGATGACGATGGCTACCGCCCAAATGTAGGTATCGTAATTTGTAATCGTCAGGGGCAGGTGATGTGGGCCCGGCGATTTGGTCAGCACTCCTGGCAGTTCCCGCAGGGCGGGATAAATCCAGGGGAGTCGGCAGAACAGGCGATGTACCGGGAACTGTTTGAAGAAGTTGGGTTAAGCCGTAAAGATGTGCGGATCCTTGCTTCTACTCGCAACTGGTTGCGTTACAAGTTACCAAAACGTTTGGTGCGTTGGGACACAAAGCCGGTATGTATCGGCCAGAAACAAAAGTGGTTTCTTTTGCAGTTAATGAGCGCCGACGCCGAAATCAATATGCAAACCAGCAGTACGCCGGAGTTTGACGGCTGGCGCTGGGTAAGTTACTGGTATCCGGTT…	GTG	TAA
cysQ	ATGTTAGAACAAGTATGCCAGCTTGCACGGAACGCGGGCGATGCCATTATGCAGGTTTATGATGGAGCCAAACCGATGGAGTACGCCCGCAAGCAGGACGATTCTCCAGTCACTGCGGCGGATATCGCCGCACATACCGTGATTCTCGAAGGGTTACGCACGCTCACGCCGGATATTCCGGTGCTTTCAGAAGAGGATCCGCCCGCCTGGGAAGTGCGCCAGCACTGGCAGCGTTACTGGCTGGTCGATCCGCTCGACGGCACCAAGGAGTTCATCAAGCGCAATGGCGAATTCACGGTCAATATCGCGCTGATTGAGCAGGGCAAGCCGGTGTTGGGCGTGGTCTATGCGCCGGTGCTGAAAGTGATGTACTACGCGGCGGAAGGTAAGGCCTGGAAA…	ATG	TGA
ksgA	ATGAATAATCGAGTCCATCAGGGCCATTTAGCCCGTAAACGCTTCGGGCAAAACTTTCTCAACGATCGGTTTGTGATCGACAGTATTGTTTCTGCTATTAATCCGCAAAAAGGCCAGGCGATGGTTGAAATCGGCCCCGGTCTGGCGGCGCTGACGGAGCCGGTCGGCGAACGACTGGATAAGCTCACGGTCATTGAACTTGACCGCGATCTGGCGGCGCGTTTGCAAACCCATCCGTTTTTAGGGCCGAAGCTGACTATTTATCAGCAGGACGCCATGACCATGAACTTTGGCGAACTGTCTGCGCAGTTGGGCCAACCGCTGCGTGTGTTCGGCAATCTGCCCTATAATATCTCCACCCCGCTGATGTTCCATCTCTTTAGCTATACTGATGCCATT…	ATG	TAA
SL1344_0698	GTGCAGCCGAAAAGCAGAACCGGACAGGGTGTCAGAGAGCAGTGTTTAGATAGGGCCAGACGTCATTTTTCATACAGACATGGAATGGCTCCCGGTCCACGAAAGGGTGCGGACATGTTGTTTCCACAACACGAAGCTGCCGTTGCTGGCGCAGTGCCGGGTCGGCAATGGCCAGAGGAGAACAATCTGATGACGCAAGAATATGCGGAAATGTCCACCGGAAGGGGGGGGACCAGTAAGTGCCGGTACAGTATGGGGGCGAAAATATTTTTGCTCCTGCTGGCGGTCTCCACCGTCGCAGCGTTGTTCAGCCTGTACCAGGTTCTGACGTACTGA	GTG	TGA
cls	ATGACAACCTTCTACACCGTGGTGAGTTGGCTGGTCATTTTGGGATACTGGGTTCTCATTGCCGGCGTCACATTACGTATTCTAATGAAACGGCGCGCAGTTCCCTCCGCAATGGCCTGGTTGTTAATCATCTATATCCTTCCGCTGGTCGGGATCATCGCCTATTTGTCCGTGGGCGAATTGCATTTAGGCAAACGTCGCGCCGAGCGTGCCCGCGCCATGTGGCCGTCTACCGCCAAATGGTTGAATGACCTCAAAGCCTGCAAACACATTTTCGCGCAAGAAAACAGTAGCGTCGCATCGTCCTTGTTTAAGCTGTGCGAACGACGTCAGGGGATTGCGGGCGTCAAAGGCAACCAGTTGCAATTGCTTACCGACTCCGATGATGTCATGCAGGCG…	ATG	TAA
ybfA	ATGACCGTCCCTGCCCGGAAAAGAAAAAAGGAGTCACCCATGTTTTTTATTGAGAATGAAGGTCAGGCTGTCGCCGGAACGGATTACTGGCAGTCTGTACAGGCGCAGGCCGGATATGTCTACCTCAGCTGGAATGCCGGCGCAGCCAGGCTGCTTGTCCCGGATGCGGCAAAACATTTACTCAGGGAGATGCGGGGGGCTGAGTACGTCATCATCAGTAAGGGAGCACTGCATGGCCGCGATGCGCTGGAACTGGTATTTGAAGACGGCAGCGATGCGCCGTTTGTGATCCACATGCTGAGTGAGCAGTGCGATCGCCTGCTCCCCGAAAACAACCAGGGAGGGGGTTTTGTTGTCACCGTCTGGACGCGTGGAGGTAACCAGCTCCGTTATCCGGGA…	ATG	TGA
cbiD	ATGAGCGAGCTTTCTTTTGACGCGCCGGTCTGGCACCACGGTAAAGCGTTACGTAAAGGATATACCACCGGTTCCTGCGCGACGGCGGCGGCAAAAGTCGCCGCGCTGATGGTATTACGTCAACATCTGATTCATCAGGTCTCCATCGTCACGCCGTCGGGCGTCACGCTATGCCTGAACGTGGAGTCGCCGCACATTGAAGGCCAGCAGGCGATAGCCGCAATTCGTAAAGATGGCGGCGATGACGTGGATGCCACGCACGGAATGCTGATTTTTGCCCGCGTTACGCTCAACGACAGCGGTGAGATTACGCTCACTGGCGGCGAAGGTATTGGTACGGTAACGCGTAAAGGGATTGGACTGCCGCTCGGGAGCGCCGCCATCAATCGTACGCCGCGC…	ATG	TAA
amtB	ATGAAGATAGCGATGATAAAAACCACACTGGCTTCACTGGCGCTGCTGCCTGGGCTAACGATAGCCGCGCCGGCGGTTGCCGATAAAGCGGATAGTGCTTTTATGATGATTTGCACCGCGCTGGTGCTGTTCATGACGATACCGGGTATCGCGCTGTTTTACGGCGGATTAATTCGCGCCAAGAACGTGCTGTCAATGTTAACGCAAGTGACCGTCACCTTTGCGCTGGTCTGTATTTTATGGGTGGTGTACGGCTATTCGCTGGCTTTTGGCGAAGGGAATCATTTTTTCGGTAATGCCGATGGGGCGATGTTGAAGAATATCGCGTTGACGGCGGTAACGGGTACGATTTATCAGTATATTCATGTCGCGTTTCAGGGATCTTTCGCCTGTATTACC…	ATG	TGA
ptsG	ATGAAAAGATTCAACCTTCTGCAAATGTTACAAAGCATCGGGCGATCGTTAATGATCCCCATTGCCATGCTGCCTGCCGCCGGTATTTTGCTGGCTTTTGGTGTTAGCTTTCAGGATCCCAATATTGTCGCCAGCCTGCCGTTTCTCGGCACTGACGGGCTGGTTCACGTGCTGAAGCTGATGGCGGAAGCGGGCAGTGCGATTTTCGCCAACCTGCCGCTGCTGTTTGCGGTCGGCGTGGCGGTGGGACTTAGTGACGATCAGGGCATTGCCGGGCTGTCGGCGATCGCCGGGTTTTTGATTATGAACGTCACCATCGGCCAGTTTCTGGGGATCACGCCCGAATCGGTGGCGCAGGTGCGTGACTACACGATGGTGCTGGGCATCCCTTCGCTGCAG…	ATG	TAA
SL1344_1430	ATGATGAAAATCGCAACTGCAATAGCCGCTCTGGCGTTAGTTAGCGCCCCCTCGCTGGTGATGGCGGCACCGGGATCGTGCGAGAGAGTAAAAAGCGATATTGAACAACGTATCATCAATAACGGCGTGCCGGCGGATAATTTTACGCTCACTATCGTTCCTAACGACCAGGCCGATCAGCCGGACTCACAGGTGGTGGGCCATTGCGCGAACGACACGCATAAAATTCTTTATACCCGCACCAGCAGCGGCAATGCGCCAGCCAATACCTCTCCCGCTCAGGACGGTTCATCCGCCGAACCGCAATAA	ATG	TAA
SL1344_2593	ATGACAAAAGTAAAGCATCATTTTACCAACAAGTCAAACAACACATGCCTACCTACAAGTAAAGCAATCATTTACAATGAGGTGATGAGCGATAACACACTGACGAATGGCCTGATCTCCAGGCTGGCAGAGTTAAATAAGAAGGGTTTCTCTAAAACAGAGATGGCCAGGGTAGCTGGTGTCAGCAAGCAAGCAGTTTCCAGTTGGTTCAAAACAGGAAGAATTAGTAAAAGCTCCGCATTAGCTATCGCTGATGCTGCTGGCGTATCAGTTCCGTGGCTGCTTGGTGAGGATGTCGGAGAGAAAGACGGACTTAAACCTGACGAACAGCGCCTGCTTGAGCTCTATCGCCAGTTGCCCGAGGAAGAGCAGCAGAACATGATGAGAGTTTTCTCTCTG…	ATG	TAA
ratB	GTGAAATCGAAAAAGTGTGTCGGTTTTTTACCCTGGCTGCTGCTATGCGCCCTCAGTTTAACGCCTTTCTTCGCGCAGGCCGTGCGAAGCAGCGGCGCATGGCAGGAACTCACTGAGCAAACTGCGGCTATTAATGGCACTCCGCCTCAGGCCGATAGTGTAACGATCCCGGTATATCAGGGCAGCGTGCAGTTGCGCTCTGATGCGGCGAATCCTGTTGACTACTCCGCGAAGCCCAGCCAGTTCAGCACCAGTGATGTCGGCAGCGCGCTGACCTTAACCAATCCGCACGACACCGAAGGCGATATCTTCGCCGTGCCGCCGCTGGCCTGGCAGGCTGAACGCGCGCCCGCCGTTACGCTGGTGTGGGCCGACGCCGCCACGCCGGACACGCCGCTT…	GTG	TAA
SL1344_3663	ATGAACACAATAATAAAGCGCACAAAAGTGCGTCATACCATTCTTATATTTTTATTTCTTGCTACCGTATTTAATTATGCGGATCGCGCAACTCTATCCGTAGTTGCCCCAATAATGAGTAAAGAATTAGGTTTTGATCCGGAAGCGATGGGCCTGGCCTTCTCCTCATTTGGTATTGCCTATGTCATTATGCAACTACCCGGCGGTTGGCTATTAGACCGCTACGGTTCACGACTGGTTTACGGTTGCGCATTGATTGGCTGGTCGTTAGTAACCATGTTTCAGGGAACGATCTATCTGTATGGCAGCCCATTAATTGTACTGGTTATTCTACGTCTGCTGATGGGCGCGATTGAAGCGCCTGCCTTTCCGGCGAACAGTCGTTTAAGCGTACAATGG…	ATG	TGA
dapD	ATGCAGCAGTTACAGAACGTTATTGAGACCGCTTTTGAGCGCCGCGCCGATATTACGCCGGCTAATGTAGATACCGTGACCCGAGAGGCAGTAAACCAGGTCATTTCTCTACTTGATTCCGGCGCGCTGCGTGTCGCAGAAAAAATCGACGGTCAGTGGGTCACTCACCAGTGGTTGAAGAAAGCGGTTCTGCTCTCTTTCCGTATTAACGATAACCAGGTTATCGACGGTGCGGAAAGCCGCTACTTCGATAAAGTCCCGATGAAATTCGCTGATTACGACGAAGCGCGTTTTCAGAAAGAAGGCTTCCGCGTCGTTCCGCCTGCGGCCGTTCGTCAGGGCGCATTTATCGCCCGCAACACCGTGCTGATGCCGTCTTACGTTAACATCGGCGCCTAC…	ATG	TAA
SL1344_1886	TTGCGGTCTGGCAACTGCAAAAGTTCAACAAGAAATCAAAAGGGGGTCCCAATGGGGGACGAAAAGAGCTTAGCGCACACCCGATGGAACTGTAAATATCACATAGTTTTCGCGCCCAAATACCGAAGACAAGCGTTCTATGGAGAGAAGCGTAGGGCAGTAGGCAGCATATTAAGAAAATTGTGTGAATGGAAAAACGTACGAATTCTGGAAGCAGAATGTTGTGCAGATCATATTCACATGCTTCTGGAGATCCCGCCGAAGATGAGTGTGTCGAGTTTCATGGGATATCTGAAGGGTAAAAGTAGTCTGATGCTTTACGAGCAGTTTGGGGATCTAAAATTCAAATACAGGAACAGGGAGTTCTGGTGCAGAGGGTACTATGTCGATACGGTGGGT…	TTG	TAA
SL1344_1192	ATGAAATTGTTCTTCAGTCATTTTTTGCGGCTGATTATTCTGTTGGTGCTGGTGGCTGCCGGCACCTTCATTTTGCTTAGCTTTTCGCCCGTTGATCCTATCCGTGCTTATATTGGCAACGATCTGCTCCATGTTCCGCCAGAACAATATGCGCGGATTGCGGCGCGCTGGGGGCTTGACCAGCCGCTGTGGGAGCGTTTCGGTCACTGGTTTTGGCGTCTGCTCCAGGGCGACATGGGGTATTCCATGCTGTTCAACATGCCTGTCGCCAGTGTGATCCGGGAACGTTTTGCGACGTCATTCGCGCTGCTGGCAGGCGCCTGGCTATTGTCTGGTGTGCTGGGCGTGACATTGGGTTTTCTGGCCGGACGTTTTCTCCACCGTTGGCCGGATAAGATG…	ATG	TAA
SL1344_3220	ATGAAAATCGTAATTGCCCCCGACTCCTATAAAGAAAGCCTTTCTGCCGCCGAGGTAGCGCAGGCGATAGAAAAAGGATTTCGGGAAATTTTCCCCGATGCGCAATATGTCTCTGTTCCGGTTGCCGATGGCGGCGAAGGAACGGTCGAAGCCATGATTGCCGCGACGCAGGGCGTTGAACGCGCCGCATGGGTGACCGGGCCGTTGGGTGAAAAAGTGAAAGCCTGCTGGGGAATGTCCGGGGATGGTAAAACCGCGTTTATTGAAATGGCGGCGGCCAGCGGACTGGCGCTGGTTCCGCCAGAAAAACGCAACCCTTTGATTACAACCTCGCGGGGAACGGGGGAGCTGATATTGCAGGCGCTGGAAAGCGGCGCAAGCAATATCATTATCGGCATT…	ATG	TGA
hpcG	ATGCTCGATAAACAGACCCATACCCTGATCGCCCAGCGACTTAATCAGGCTGAAAAACAGCGCGAACAGATTCGCGCAGTGTCGCTGGATTATCCCAACATCACTATTGAAGATGCCTATGCCGTACAGCGTGAATGGGTCAATATCAAGATTGCCGAAGGGCGCACGCTCAAAGGCCACAAAATCGGCCTGACCTCAAAAGCGATGCAGGCCAGCTCGCAAATCAGCGAACCGGATTACGGCGCGCTGCTTGACGATATGTTCTTCCATGACGGCGGCGATATCCCCACCGACCGTTTTATCGTCCCGCGTATTGAAGTGGAGCTGGCGTTCGTGCTGGCGAAACCGCTGCGCGGCCCTCACTGCACGCTGTTCGACGTCTACAACGCCACGGATTAT…	ATG	TAA
rcsB	ATGAACAATATGAACGTAATTATTGCCGATGACCACCCGATTGTACTGTTCGGTATTCGCAAATCACTTGAACAAATCGAGTGGGTGAATGTTGTCGGCGAATTTGAAGATTCCACAGCATTGATCAACAACCTGCCGAAATTAGATGCGCATGTGTTGATCACTGACCTCTCCATGCCGGGAGATAAATACGGCGATGGGATCACCTTGATCAAGTACATCAAGCGTCATTTTCCGAGCCTGTCTATTATCGTTCTGACCATGAACAACAACCCGGCGATCCTGAGCGCCGTGTTGGATCTTGATATTGAAGGGATCGTACTCAAACAGGGTGCGCCAACCGATCTGCCTAAGGCGCTGGCCGCGCTGCAAAAAGGCAAAAAATTCACCCCAGAAAGC…	ATG	TAA
yihQ	ATGAATTCTCTACCACAACGGTCAACCGATTTTGAACTGACAACATCACAGGATGGTTTTGCGCTTAGCTGGCAACAGCGCCTGATTTTACGCCACAGCACCGAAAATCCCTGTCTGTGGATTGGCGCGGGCGTTGCCGACATTGACATGTTTCGCGGCAACTTTAGCATCAAAGACAAACTTAACGAAAAGATTGCATTAACGGAGGCCACCGTCAGCGAGCTACCTGACGGCTGGCTGGTACAATTCAGCCGTGGCGCAACAATTAGCGCCACCCTTCGCATCTCCGCCGATGAAGCGGGACGCCTGCAGCTGGATCTGCAAAACGACGACCTGCACCATAACCGTATCTGGTTACGTCTCGCAGCTAATCCAGACGACCATATCTACGGCTGCGGC…	ATG	TAA
ptsP	ATGCTCACTCGCCTGCGCGAAATAGTCGAAAAAGTGGCCAGTGCGCCGCGTCTGAACGAGGCGCTGAATATTCTGGTCACGGATATCTGTCTTGCGATGGATACAGAGGTTTGCTCGGTTTACCTGGCCGATCATGACCGACGCTGTTATTACCTGATGGCGACGCGGGGGTTGAAAAAACCGCGTGGTCGAACCGTTGCGCTTGCGTTTGATGAGGGGATCGTCGGTCTGGTGGGCAGACTGGCGGAACCCATTAACCTTGCCGATGCGCAAAAACATCCCAGCTTTAAATACATTCCTTCGGTAAAAGAGGAGCGTTTTCGCGCGTTTCTCGGCGTGCCGATCATTCAGCGTCGCCAACTTCTCGGCGTGCTGGTCGTACAGCAGCGCGAATTGCGC…	ATG	TAA
cpdB	ATGATTAAGTTTAGTGCAACGCTTCTGGCTACGCTGATCGCCGCCAGCGTGAATGCGGCCACCGTCGATCTCCGTATCATGGAAACTACTGATTTACATAGCAACATGATGGATTTCGATTATTACAAGGATACCGCAACCGAAAAATTCGGATTGGTACGTACCGCAAGTTTGATTCATGCCGCCCGAAATGAAGTCAAAAACAGCGTGCTGGTGGATAACGGCGACCTGATTCAGGGGAGCCCTCTGGGCGATTATATGGCGGCAAAAGGGCTCAAAGACGGTGACGTTCACCCGGTCTATAAAGCGCTCAACACTCTGGATTACGCGGTTGGAAACCTCGGCAACCATGAGTTTAATTATGGTCTGGACTATCTGCATAACGCGCTGGCTGGCGCG…	ATG	TAA
apaG	ATGATCAATTCGCCCAGAGTGTGTATTCAGGTGCAAAGCGTCTACATTGAGGCGCAATCCTCACCTGACGATGAACGTTACGTTTTTGCCTATACCGTAACCATCCGCAATCTGGGCCGGGCGCCAGTGCAGCTATTGGGCCGCTACTGGCTGATTACCAATGGTCATGGCCGTGAAACCGAAGTCCAGGGCGAAGGTGTGGTTGGCGTCCAGCCGCGCATTGCGCCTGGCGAAGAGTACCAGTACACCAGCGGCGCGGTAATTGAAACGCCGCTGGGCACCATGCAGGGTCATTACGAAATGATCGATGAAAATGGCGACGCCTTTACCATCGACATCCCCGTGTTTCGACTCGCCGTCCCTACACTCATTCACTAA	ATG	TAA
fimB	GTGAAAAGAAAATATCTTACGCAAGAAGAGATTGAAAAACTGCTGTCAGCGACCGACAGAATGCCCTTCCCGGAAAGAAACCGCTGCTTAATCCTGATGGCGTTTATTCACGGCTTCCGGGCCAGTGAGCTGCTGGGGCTGCGCTTGTCGGATATTGATCTTGCAGGAAGACAGCTTTATATCCGGCGCCTCAAAAATGGCTTTTCAACGTGTCACCCCCTCCTTCCCGATGAGTATAACGTACTGAAAAGCTGGCTCAGGGCCAGGAAGTATCTTGAGAAAGGGGCTGACGGAGACTGGCTGTTCCTGTCGCTACGACGGCATCCGCTCAGCAGGCAACAATTTTTTTACATACTTCGTGAGGCAGGGCGGTTGGCCGAATTAACGATAGCGCCACAT…	GTG	TAA
SL1344_4158	ATGAAAAAAGTACTGTATGGCATTTTTGCCATAACCGCGCTTGCGGCGACATCTGTCTCGGCAGCCCCCGTTCAGGTGGGTGAAGCGGCAGGGTCGGCAGCGACGTCGGTATCGGCGGGAAGCTCCTCCGCTACCAGCGTTAGCACCGTAAGTTCGGCGGTGGGCGTCGCGTTAGCGGCAACCGGCGGCGGCGATGGTTCCAATACCGGAACCACGACCACCACGACCACCAGTACCCAGTAG	ATG	TAG
SL1344_1669	GTGCTGTATGTTATTTACGCTCAGGACAATGCCAACTCGCTTGAAAAACGCCTCTCGGTACGGCCCGCGCATCTGGCGCGCCTGCAACTTCTGCATGATGAAGGGCGATTATTAACTGCCGGGCCGATGCCCGCAGTGGACAGTAACGATCCTGGGGTAGCCGGATTTACCGGGTCAACGGTGATTGCTGAATTTGAATCTTTAGAAGCAGCGCAATCCTGGGCTGATGCGGACCCCTACGTCGCCGCGGGCGTCTATGCGCAGGTTTCGGTCAAACCGTATAAGAAGATCTTTTGA	GTG	TGA
ybbA	GACAGGCCTGCAGCCACTGCGCCACTTCCAGCGGATCGCCCTCCCGGCGTACCACTCTGCCTTCTTTATTCCATAACTGCAGACAGGTGCTGCCGTCGAGACGCACCACAAAATCCCCACGGCAGGCCTGATACGTTATGCCGTTCAGCTCCACCTCCAGATCAGTGGCAGAAGTGCCATCTGCGGGCAGACCTGCTGCCGGGACCAGCGGCAGTACGACGACTTCTGCCGCACGCTGTTCTGCCCGGAGGCGGTCTTGTTCTGCCAGCAGCAGAGGCTGTGCCACAGCCCGGCCGGCCTCCGTCAGCTCTACTGCCAGCTGCAGGTTCGGAGCGCGCAGGGTACGCAGCCAGCCGGCATCCTCCAGACGACGGCAGGAGGCGCGCAGGTTTGGCCCGT…	GAC	TGA
mreC	ATGAAGCCAATTTTTAGCCGTGGCCCGTCGCTACAGATTCGCCTTATTCTGGCGGTGCTGGTGGCGCTCGGCGTTATCATTGCCGACAGCCGCCTGGGGACGTTCAGTCAAATCCGAACGTACATGGACACTGCCGTCAGTCCTTTCTATTTTATTTCAAACGGCCCTCGTGAACTGCTCGACAGCGTGTCGCAAACGCTGGCTTCTCGCGACCAGCTTGAGCTGGAAAATCGGGCGCTGCGCCAGGAATTACTGCTAAAAAACAGCGACCTGCTGATGCTGGGGCAGTACAAACAGGAGAACGCGCGGTTGCGCGAGCTGCTGGGGTCGCCGCTGCGTCAGGACGAGCAGAAAATGGTGACTCAGGTTATTTCAACGGTTAACGATCCTTACAGCGAT…	ATG	TAA
SL1344_2741	ATGAAACAGCTACACCACAGCGGCCTGCCGCTGTATCTCGATGATGATGGCGTAATGGCGCTGAAACCGCCGCTAAACTATCTCGGCTTTGGCCGCAAAAGCGCCGGGCAGATGGCGGTGGTTTTACCGGAGTTCACCGAAGGGCTGCGTAATGAACCGGCTTACGATGTTTATCGCGGTCTCAGCTTTGCGGAGGATCAGGAACGGCTTGCTGCTGACCAGTATCAGTACGACATCACCATCATCATGCCGGGGACGATTGGCAAGGAGCGTAAGAAAACCAGTGGCCATTATCACGGCTATAACGACACGCGGCGCAACACCCATCCGGAGGTGTATGAAGTAATTAAGGGTACGGCGGCGTATATCCTGCAAAAGTCGCCGGATTTTGCCGCCGCG…	ATG	TGA
cbiE	ATGCTAACGGTCGTGGGAATGGGGCCCGCTGGACGGCATTTGATGACGCCTGCGGCGCTGGAAGCGATAGACCACGCCGATGCGCTGGCAGGCGGTAAACGGCATTTGGCGCAGTTTCCGGCGTTTGGCGGCGAACGATTTACGCTGGGCGCGGATATTGGCGCGTTGTTGTCATGGATTGCCGCCCGTCGGGATAAAGGGATCGTGGTGCTGGCCTCCGGCGATCCGCTGTTTTATGGCATCGGTACACGCCTGGTGGCGCATTTTGGTATCGAACAGGTTCGCATTATCCCTGGCATCAGCGCCGTACAGTATCTGTGCGCACAGGCTGGAATTGATATGAATGACATGTGGTTGACCAGTAGCCACGGTCGTTGCGTCAGCTTCGAGCAGTTAGCG…	ATG	TGA
glnK	ATGAAGCTGGTTACCGTGATTATCAAACCGTTCAAGCTGGAGGACGTGCGGGAGGCGCTTTCTTCCATTGGCATTCAGGGACTGACCGTCACCGAAGTGAAAGGGTTTGGCCGTCAGAAAGGACACGCCGAACTGTATCGCGGCGCGGAGTACAGCGTGAATTTCCTGCCGAAGGTCAAAATTGATGTGGCTATCGCCGACGACCAACTGGAAGAGGTGATCGATATCATCAGTAAAGCGGCTTACACCGGAAAAATTGGCGACGGCAAAATTTTCGTCGCGGAGCTCATGCGCGTTATTCGGATTCGTACCGGCGAAGCTGACGAAGCAGCGCTGTAA	ATG	TAA
uspB	ATGATAAGCACCGTCTCACTATTCTGGGCTTTATGTGTCGTTTGCATTGTTAATATGGCGCGCTATTTCTCATCGCTACGCGCACTGTTAGTGGTACTTCGTGGTTGCGATCCTTTGCTCTATCAATATGTCGATGGCGGCGGCTTCTTTACCACGCATGGTCAGCCCAACAAACAGGTGCGCCTGGTATGGTATATCTACGCTCAGCGCTATCGCGATCATCATGATGAAGAATTTATTCGCCGTTGTGAACGCGTGCGCCGCCAGTTTCTGCTGACCAGCGCGTTATGCGGTTTGGTGGTGGTGAGCTTGATTGCGCTCATGATTTGGCACTGA	ATG	TGA
dmsA1	GTGATGCCCGGAGAAAAGCAACAAACAGGCGTTAGCCGCAGGACGTTAGTGAAATCAGCGGCGCTTGGCTCACTGGCGCTGGCTGCCGGAGGCGTATCTTTACCGTTTGGGATGCGTACCGCGGCCGCGGCGGTGCAGCAGGCTATGCGCAACGAAGAAGATAAAATCGTCTGGGGCGCCTGTTCGGTCAACTGCGGCAGTCGCTGCGCCCTGCGTCTGCATGTAAAAGATAATGAAGTCTGGTGGGTTGAAACTGATAACACTGGCGACGATGTCTACGGCAATCATCAGGTTCGCGCCTGCCTGCGGGGCCGTTCAATCCGTCGGCGTATTAACCATCCGGATCGCCTTAACTATCCCATGAAACGCGTTGGCCGCCGCGGCGAAGGCAAATTTGAA…	GTG	TAA
cII	GTGTTACGCCACATGAGTTACGGCCTGACTTGTATCCAAATCCAACAGATGCATTACCAAGCCAAGAGGCGTCAGCCAAATAACCATAGAGGATATTTACCCATGGAGAACGCAATTGCACGAAAGTTAGACCCACCAGAAATCAACCCGATTGAGATAGAGAGTGTCCTGCTCAACCGGCTTGCATCGGTAGGTCAGAAATCATACGCCGAGCATATGGGCATCAGCGAGTCGACAGTCAGCAGGCGTAAAGCTGAGGGGTATTTCTGCAACATGGCGAAAGAGCTGGCTTTTCTTGGGATTCAGGCCGCGCCACCGGAAGCGGTACTGGTATCCAGAAACTATCTCACAGCTGTAGAGATTCTCGCTGATGCCGGGCTAAAGGCTGAACGAGCCAGG…	GTG	TGA
glpE	ATGGAACAATTTGAATGTATCACTGTAGAAGAGGCGTATCAGAAACTGCACCAGGGCGCGGCGGTGCTGGTCGATATTCGCGATCCGCAAAGTTATGCCATGGGTCATGCGCCGCAGGCGTTTCACTTGACTAACGATACGCTGGGCGCGTTTATGCGTGAGCATGGTTTCGATACCGCCGTGATGGTAATGTGCTATCACGGCAACAGTAGTAAAGGCGCCGCGCAGTATCTGCTCCAGCAAGGCTATGATGCGGTTTACAGCATTGACGGCGGGTTTGAGGCCTGGCATCGCCGTTTCCCTGCCGATGTCGCGAATGGCGCGTAA	ATG	TAA
fliA	GTGAATTCACTGTATACCGCTGAAGGTGTAATGGATAAACACTCGCTGTGGCAGCGTTATGTACCGCTGGTGCGTCACGAAGCATTGCGCCTGCAGGTGCGATTGCCGGCGAGCGTGGAACTGGACGATCTGCTACAAGCGGGCGGCATCGGGTTATTAAATGCGGTCGACCGATATGACGCTTTGCAAGGAACGGCATTTACCACTTACGCAGTGCAGCGTATTCGTGGGGCGATGCTGGATGAATTACGCAGCCGCGATTGGGTGCCGCGTAGCGTCCGGCGTAATGCCCGCGAAGTGGCGCAGGCGATGGGACAACTGGAGCAGGAACTGGGGCGTAATGCGACGGAAACCGAAGTGGCGGAACGTCTTGGCATCCCTGTTGCGGAGTATCGTCAG…	GTG	TAG
SL1344_3662	ATGGCTTTAAGCGCGAATTCCGACGCCGTAACGTATGCAAAAGCGGCGAATACCAGAACCGCGGCAGAAACCGGCGATCGTATCGAATGGGTGAAGCTATCACTGGCTTTTCTACCGCTGGCGACGCCAGTGAGTGACGCGAAGGTACTGACCGGGCGCCAGAAACCTTTGACCGAAGTGGCAATCATCATTGCCGAAATCCGCAGTCGCGACGGCTTTGAGGGCGTTGGTTTTAGCTACTCCAAACGTGCTGGCGGCCAGGGTATTTATGCTCACGCCAAAGAGATAGCCGATAATCTACTGGGCGAAGATCCCAATGATATCGACAAAATATACACCAAGCTGCTGTGGGCCGGAGCCTCGGTGGGGCGTAGCGGGATGGCGGTACAGGCTATCTCC…	ATG	TAA
SL1344_0213	ATGTCCGGAACGTATAATGCTACTATTCTCCGGGTGGTGGTTTCCGCCTGGATAGGAAACTCCATTGAATATTATGATTTTCTATTATACGGCCTGGCAAGCGCGCTGGTATTTGGCCCGCTTTTTTTTCCTGGCGCCAGCCCATTGACTGCAACGTTATCTTCTTTTGCCAGTTTCGGCGTGGGATTTATCTCCCGACCGCTGGGCGCGCTATTTTTTGGCAACAGGGGAGATACGCTTGGGCGTAAAAACACGTTATTAATTACGTTAGGGGGGATGGGCGCGGTCACGTTTCTCATCGGTTGCCTGCCTTCTTACGCCAGTATTGGCGCGCTGGCGCCTGCTTTACTGGTTATTCTGCGTTTTCTACAGGGATTTATGGTTGGAGGCGAATGGGGA…	ATG	TAA
SL1344_1191	ATGCTGCGCCGGGAGAAACAAAAACAACGCATAATCTGGGACAAATTGATGATTAAAGGCAAACTGGCGCTCGTGACGTGCGCGCTGACTCTGGTATTCACTTCGTCGCTTTTCGCCGCGTCGGACACGGCAGACGGTCGTACCCTGAAGCTGGCCATTGGCCCTGAGCCAACGGAAGGCTTTGATCCTATGCTGGGCTGGAGCCACGGCAGCTACTTATTGCTTCATGCGCCGTTGCTTAAGCAAAACGCCGACATGAGTTGGGGTAATTTACTGACGGAAAAAGTGGATACCAGCCCCGACGGTAAAATCTGGACGCTAACCTTAAAGCCCGGGCTGAAATTCTCCGATGGCTCGCCATTAACTGCCGAAGATGTCGTTTTTACATACAATAAAGCG…	ATG	TGA
shdA	GTGCGAAATATGTATGTCGTGGCTTCAGAACTGGCGCGAGGCCACAGCAAAGTTAAAGCGCAAGTATGCGCGAGTGAAACCCATTCTCCAAACCAAAAGTCCGAATATGGACAAATAATAAAAGCAACGCGCGCGGCGCTGGCTTGCGCCGTGGCTGCGGCGCTCGGATTTTTCAGCCCGCTGGCTATGGCCGATAATCAGGTATCATATGCTGATGCGCAGCCCCACGTTCTGGATGCGTCAACGCCGCCGATAAGCTATTCGGGCACCGATGAAGGCGCGGCGCTATATGTCTCGGGTGTCGCCACCGTCGGCTGGCAGCCCACCACGGTCACAGGGACGGGGCTCGTCATTGAAACAAGCGGAGGCGGGGCTGATGATCCGGATGGCGGTAAGTAT…	GTG	TAA
tdcA	ATGAATACTCTTGTTCTCCCTAAAACACAGCATTTGGTGGTCTTTCAGGAAGTCATTAGAAGTGGTTCTATCGGTTCTGCCGCAAAATCGTTAGGGTTAACCCAACCCGCCGTCAGTAAAATCATTAGCGATGTTGAGGCCTATTTTGGCGTTGAGCTAATTGTACGTAAAAATACCGGCGTTACGTTGACCGAAGCGGGACAGGTACTGCTTTCCTGGTCTGAATCTATCACCCGCGAAATGAAAAACATGATCAACGAGATGAACAGTATGACGTGCAATACCGTTGTCGACGTCTCGTTTGGCTTTCCTTCGCTGATTGGCTTTACCTTCATGTCCGATATGATTCATAAGTTCAAAGAGGTCTTTCCAAAAGCGCAGGTATCCATGTACGAAGCC…	ATG	TGA
sthD	ATGAATATGAACAGATTTGCTGCATTAGCCGCCCTGTTAACGTTCACGGGTCTGGCATTATGGTCGCCCTCGATCAGCGCGGCATACAATACCGCAGATGCCGTAGGCATTAACGTTACGGGATTAATTTATGCCGATCCGTGTACCGTGACGGTCCCCGACACGCTCTCTCTTGGACAATATGCCCGGGCGGATATCGCCGTGGCCGGTGGCAATACCGCCACCATTCCTTTCACCATAAAAATGACGAATTGCCCGGCAACGACCACAAAAGCCGCGATTTCATTTAACGGCGTACCTTATCCCGATCCAAATTATGCTTCTGCGATTTATGCAAACAGCGCGGCCAATCCGGCGCAGGATTTAGGATTACAGCTTTTTAACCTGGACGGTAAAAGT…	ATG	TAA
hpcD	ATGCCGCACTTTATTGCTGAATGTACTGAAAATATTCGCGAGCAGGCTGATTTACCCGGCCTGTTCAGCAAGGTAAACGAGGCGCTGGCCGCCAGCGGGATTTTCCCCATCGGCGGTATCCGCAGTCGCGCCCACTGGCTGGATACCTGGCAGATGGCTGACGGTAAGCATGATTACGCGTTTGTGCATATGACGCTGAAAATCGGCGCCGGGCGCAGCCTGGAGAGCCGTCAGGAAGTTGGCGAAATGCTGTTTGGGCTGATTAAAGCCCACTTCGCCGACCTGATGGAGAACCGCTATCTGGCGCTGTCGTTTGAGATTGCCGAGCTACATCCGACGCTCAATTACAAACAAAACAACGTACACGCGTTATTTAAATAG	ATG	TAG
rpsJ	ATGCAGAACCAAAGAATCCGTATCCGCCTGAAAGCGTTTGATCATCGTCTGATCGATCAATCAACCGCGGAAATCGTCGAGACTGCCAAGCGCACTGGTGCGCAGGTTCGCGGTCCGATCCCGCTGCCGACCCGCAAAGAGCGCTTTACCGTTCTGATCTCTCCGCACGTTAACAAAGATGCGCGCGATCAGTACGAAATTCGCACTCACAAGCGTCTGGTTGACATCGTTGAGCCAACCGAGAAAACCGTTGATGCTCTGATGCGTCTGGACCTGGCTGCCGGTGTAGACGTGCAGATCAGCCTGGGTTAA	ATG	TAA
yojN	ATGAGTCAGTCTGACACAACGGTCTCTACCCGATTCTCCCTTCTACCGGGAAGCATTACCCGTTTCTTCTTATTGCTGATCATTGTGCTGCTGGTAACGATGGGCGTTATGGTACAGAGCGCCGTCAACGCCTGGTTGAAAGACAAAAGCTATCAAATTGTCGATATCACCCACGCTATTCATAAACGCGTGGATACCTGGCGGTATGTTACCTGGCAAATTTATGACAACATCGCCGCGACCACTACGCCATCGACAGGTGAAGGACTTCAGGAAACGCGTCTGAAGCAGGATGTGTATTATCTTGAAAAGCCGCGACGTAAAACTGAAGCGCTGATTTTCGGTTCCCATGACAGCGCCACGCTGGAAATGACGCAGCGTATGTCAACTTATCTGGAT…	ATG	TAG
yihP	ATGAGTCAAACATCATCGAATCCGGCAACCCTACGCTTGCCGTTTAAAGAAAAACTTGCCTATGGACTGGGGGATTTAGGTTCTAATATCCTGTTAGATATCGGAACCCTCTATTTACTCAAATTTTATACCGATGTGCTGGGTTTACCAGGGACTTACGGCGGGATCATTTTCCTGATCGCCAAATTTTTTACCGCATTTACCGATATGGGTACCGGCATTATGCTCGACTCGCGGCGTAAAATTGGTCCGAAGGGCAAATTCCGCCCGTTCGTGCTTTACGCGGCATTTCCGGTAACGCTACTGGCGATTGCTAACTTTGTCGGCACACCGTTTGAGGTGACGGGAAAAACCGTCGTCGCAACGATGCTGTTTATGCTGTACGGGCTGGTTTTCAGC…	ATG	TAA
lgt	ATGACCAGTAGCTATCTGCATTTTCCGGACTTTGATCCGGTCATTTTCTCAATTGGGCCCGTCGCGCTTCACTGGTATGGCTTGATGTATCTGGTGGGGTTCGTTTTCGCGATGTGGTTGGCGGTGCGTCGCGCTAACCGTCCGGGAAGCGGTTGGACCAAAAACGAAGTTGAAAATTTACTCTATGCAGGTTTCCTGGGGGTCTTCCTGGGGGGACGTATTGGCTATGTCCTGTTTTATAACTTCCCTCTGTTTCTGGATAACCCGCTCTATTTATTCCGCGTCTGGGACGGCGGCATGTCCTTCCACGGCGGGCTTATCGGCGTGATACTGGTGATGATTATCTTCGCCAGGCGCACGAAGCGCTCGTTCTTTCAGGTGTCTGATTTTATTGCGCCG…	ATG	TGA
SL1344_4335	ATGCGCGCTCATACTCTTTCCCGGCAGTTGCGTGAAGGCAATCTCTTTGCTGAACAGTGCCCGTCCCGTGAGGTGTTAAAACATGTCACCAGTCGCTGGGGCGTACTGATTCTGGTGGCGTTACGCGACGGTACACACCGTTTTAGCGACCTGCGCCGCAAGATGGGAGGCGTGAGTGAAAAGATGCTGGCGCAGTCGTTACAGGCGCTTGAACAGGACGGATTTCTTAACCGGGTGTCATATCCAGTTGTTCCGCCGCATGTGGAGTACAGCCTGACGCCGCTTGGCGAGCAGGTGAGTGATAAAGTCGCCGCGCTGGCGGACTGGATAGAACTGAATTTGCCGCAGGTATTGGCGCAGCGGGAACGTTTATCAGATGGCGGCTAG	ATG	TAG
apaH	ATGGCAACTTATCTCATCGGCGACGTTCACGGTTGCTACGACGAACTGATCGCCTTATTACAGCAAGTGGAATTTACGCCAGACACAGACACTCTGTGGCTGACTGGCGATTTGGTCGCCCGCGGTCCCGGTTCGCTGGACGTGTTACGCTACGTCAAATCGCTTGGCAATAGCGTGCGTTTGGTGCTGGGGAATCACGATTTACACCTGTTGGCCGTATTCGCCGGGATTAGCCGCAACAAACCTAAAGACCGGCTGACCCCGCTTCTTGAAGCGCCGGACGCCGATGAGCTGTTGAATTGGTTACGCCGTCAGCCGCTGTTGCAGGTAGATGAAGAGAAAAAGCTGGTCATGGCGCATGCGGGTATTACCCCGCAGTGGGATTTGCAGACGGCAAAA…	ATG	TGA
SL1344_0696	ATGACGACTTATCAGGAGATTGAAGCCAGATTGATTCGCTGTTTCACTATCACGTCATGGATAGCGTGCCAGATTGCCAGCTATATGGATTTTAAGCTGTTTACGCATAGCAACTTTTTTAGCGAAAATTAA	ATG	TAA
tonB	ATGACCCTTGATTTACCTCGTCGCTTTCCCTGGCCGACACTCCTTTCCGTAGGCATTCATGGTGCTGTAGTGGCAGGTTTGCTCTATACCTCGGTACATCAGGTTATTGAATTGCCTGCGCCAGCGCAGCCTATCACGGTGACAATGGTTTCACCCGCTGACCTGGAGCCGCCCCAGGCGGTTCAGCCGCCGCCGGAGCCGGTGGTTGAACCCGAACCCGAACCGGAGCCAGAGCCGATCCCTGAACCGCCTAAAGAAGCGCCCGTGGTGATTGAGAAACCCAAACCTAAGCCAAAACCCAAGCCAAAACCGAAACCGGTGAAAAAGGTTGAAGAGCAGCCGAAGCGCGAAGTCAAACCAGCCGCGCCGCGTCCTGCCTCACCGTTTGAAAATAGCGCC…	ATG	TAA
ybaA	GTGACCTTTGAGCAGAAAAAAGCCCGGGCCATTGCCCTGATGGACAGCAAAAAGATGTGGCGGAGCAATTATGCCCCTCCTCTTCTGTGTATTCTCTGGCGGCTGGGTATCCGGCTTCCGCCATTACCCTTTATGCCGTTCTGGCAGGTCACGCTGTTGATGGGGAGCTTATGGGGCATTTCCTGGGGATGTGCAATGTGGTTTATCTACCGGGGGCCGTCAGGAATGGTGGCAGGTGAGGCCATAATTATAAGTATCACGGGTGGTTTTTGGTTCGGACTGCTCACGGCCTCTTTCCACTGGTGGCGCAGGAAAGTTAA	GTG	TAA
mdlB	ATGCGTAGTTTTGGACAGCTATGGCCGACGCTGAAACGGTTGCTGGCGTATGGCTCGCCATGGCGAAAACCGCTCTCTGTCGCGGTGATGATGCTGTGGATTGCGGCGGCGGCGGAGGTTAGCGGTCCGCTGCTGATCAGCTATTTCATTGATAACATGGTGGCCCGCCACCATTTACCGTTGGGCAAGGTCGCGGGGCTGGCGGCCGCCTATGTGGGGCTACAATTTCTGGCGGCGGGGCTGCATTACGCCCAGTCTTTATTATTTAACCGGGCGGCCGTTGGCGTGGTTCAGTCCTTGCGCACGGACGTCATGGATGCCGCCTTGCGCCAGCCGCTAAGCGCCTTCGACACGCAGCCTGTCGGACAATTAATTTCACGCGTGACCAACGATACGGAA…	ATG	TAA
dmsA2	ATGAAAATCACCAACCCTGAGGCATTAATGGCGGCCAGTCTCAGCCGACGAAGCCTGGTGAAAACCTCCGCTATCGGTAGCCTTGCGCTTGCCAGTAGCGCTTTCACCCTTCCGTTCTCCCGCATCGCACACGCCGCAGCAGACCTCGCATCCGGCAATGTGGCAGAAAAAGCGGTCTGGAGTTCATGTACCGTTAACTGCGGCAGCCGCTGCCTGCTGCGCCTGCACGTAAAAGATGACACCGTATATTGGGTTGAATCAGATACCACGGGCAACGATGAATATGGCAACCATCAGGTACGCGCCTGCCTGCGCGGCCGTTCTATTCGTCGCCGGATGAATCATCCCGATCGCCTGAAATATCCGATGAAACGCGTTGGTAAACGAGGAGAAGGCAAA…	ATG	TAA
gpO	ATGGCAAACACTGCCAAAGTAATCAATTTTCCTGTGCCTGACGTGGCACCTAAGGAGCCGCGCGTGGCAGATCTCGATGATGGCTATACGCGCCTGGCAAATGAACTTCTGGATGCCGTGATGTGTTCTGGTTTGCCGGAGACTGAGCTGTGCATCCTGATGGCCGTATGGCGCAAAACGTATGGATACAACAAGAAAATGGACTGGATCAGCAACGAGCAGCTAGAGGAGATGATTCAGAAGCATCATACCCATTGCTCGACAGCAAAAAACAGTCTGATCAGGAAGAAGGTACTGATTCAGGAAGGCCGCAGGGTTGGTATGAATATCCATATTTCCGAGTGGCAAACTAAAAATAACGGATTCTGCAAAACATTAGCTAAACCTGCTAAGAAAACC…	ATG	TGA
fliZ	ATGACGGTGCAGCAACCTAAAAGGCGGCCTTTGAGCCGCTATCTTAAAGACTTTAAACACAGCCAGACGCATTGCGCGCATTGTCACAAACTGCTCGACCGCATTACGCTGGTTCGCCGTGGCAAGATCGTTAATAAAATCGCTATTTCACAGCTGGATATGCTACTTGACGACGCTGCCTGGCAGCGGGAGCAGAAGGAGTGGGTGGCGCTGTGTCGCTTTTGCGGCGATTTGCACTGCAAAAAGCAGAGTGATTTTTTCGATATTATCGGTTTCAAGCAGTATTTGTTTGAACAAACCGAGATGAGCCATGGCACGGTGCGGGAATATGTCGTGCGTTTACGACGCCTTGGCAATTACCTCAGCGAGCAAAACATTTCCCACGATCTGCTGCAGGAC…	ATG	TAA
SL1344_3661	GTGAAGAGAACCAAATCACCTCGTGCGCCGACGCTGGAAGATGTAGCACGTAGCGCCGGGCTGTCTCCGATGACAGTCAGCCGGGCATTGAATTCGCCACAACTGGTTCGCCCCAAAACGGTTGAGAAAGTCATGCAGGCGGTTCGCGTCACAGGCTACATACCCAACGCGTTAGCCGGTGGTCTGGCGTCGCGACGGAGTAAATTAATCGCTGTCGTCGTGCCGCAAATTAACAACAACATGTTTGTCGATACCATCCAGTCGCTGAGCGATGAACTGGCCCGACGCGGATATCACATATTGCTGTGCGTGGCGGGATATACCGAACAAACGGAAGCGGAGTTGGTGGCGACACTGCTTTCCCGCCGCCCCGATGGCGTGGTGCTTACCGGGATCCAT…	GTG	TAA
cbiT	ATGAAAGATGAGCTTTTTCTGCGCGGCGAGAACGTGCCAATGACCAAAGAGGCGGTACGGGCGCTGGCACTGTCGAAACTTGAGCTCCACCGCGCCAGTCACCTGATTGACGTCGGGGCGGGAACGGGAAGCGTCTCAATTGAAGCGGCGCTGCAATTTCCTTCGTTGCAGGTGACGGCTATCGAGCGTAATCCTGCCGCACTACGGCTGCTTGATGAGAATCGTCAGCGCTTTGCCTGCGGCAATATCGATATTCTCCCCGGCGAAGCGCCAATGACCATAACCGGGAAAGCCGATGCGGTGTTTATGGGCGGCAGCGGCGGACATCTGACGGCGCTGATTGACTGGGCGATGGGCCATCTGCATCCCGGTGGCCGTCTGGTGATGACCTTTATCTTG…	ATG	TGA
xseA	ATGTTATCCTCTCAAACTTCCTCAATTTTTACCGTAAGCCGCCTTAACCAGACGGTTCGTCTGCTGTTAGAACAGGAGATGGGACAGGTATGGATCAGCGGCGAGATTTCTAATTTCACGCAGCCTGCGTCGGGCCACTGGTACTTTACGCTCAAAGACGATACCGCTCAGGTGCGCTGTGCGATGTTCCGTAACAGCAATCGCCGGGTGACGTTCCGCCCGCAGCACGGGCAGCAGGTGCTGGTACGCGCCAACATTACGCTGTACGAGCCGCGCGGCGATTATCAAATCATCGCCGAAAGTATGCAGCCCGCGGGCGAAGGCTTGTTGCAGCAGAAATATGAGCAGCTAAAAGCCAAACTGCAGGCCGAAGGCTTGTTCGATCAGCAGCATAAACAG…	ATG	TAA
yjjA	ATGAATACAGCGAAACATGTTCTGTGCTGCGCGGCGATCGCCAGCGTACTGATTTCCACCAGCGGTATTGCCGCCAGTCAGTTAAGCGCTCAGGGCGCGAACGCACAGCAGGGCGGGATGTCGCTTTCTGCGCTAACCGGTCTGCTCAGCAGAGGTGCCCAGTCGCTCAGCGCCGATAATATGAATAATGCCGCCGGTATTTTGCAGTACTGCGCCAAACAGAAACTGGCGTCCGCTACCAACGTGGAAAACGTTAAAAATCAGATTCTGAACAAGTTGGGGTTGGATACCACACAGCAGGAGCAGGACACTAACTACCTGAACGGCCTGCAAGGGTTGCTCAAGACGAAGGACGGCCAGCAGTTGAACCTCAATAATATCGGCAGTACGCCGCTGGCG…	ATG	TGA
hxlB	ATGGAAACGCAATCTGTTGCAGGCGTTGCCTGTAGCGACCTGAATCAGGCGATGTCGCGGATTGATGGCGCTGCGCTGGCGCGTCTGGAGCAGGCCATTGCTGACGCGAAAGCGGTATTTGTTTTTGGCGCAGGGCGTTCGCTGTTGATGCTGAAAGCTTTTGCGATGCGCCTGATGCATATCGGCCTGAAGGTGCATGTTGTCGGCGATGTGGTCACGCCTGCGCTGCAAAAAGGCGACCTGCTGTTACTGGCGAGTGCATCGGGTGAAACGGCTTCGCTGGTGAATGTGGCAACGAAAGCGAAGCAACTGGGTGGCACTGTGGCCTTGCTGACCATTTTCCCCGAGTCCACGCTGGGGAAACTGGCGGGGGTGGCGGTCAGGATCCCGGCTTATTCC…	ATG	TAG
tdcB	ATGCACATTACATACGATCTCCCGGTTGCAATTGAAGATATCCTCGAAGCGAAAAAAAGACTGGCGGGGAAGATATATAAAACGGGAATGCCTCGCTCTAACTATTTTAGTGAACGTTGCAAAGGCGAAATATTTCTCAAGTTTGAAAATATGCAGCGTACGGGTTCATTTAAAATTCGTGGCGCTTTTAACAAACTTAGCTCGTTAACGGAGGCGGAAAAACGTAAAGGCGTCGTGGCCTGTTCCGCAGGTAATCATGCACAGGGCGTTTCTCTTTCTTGCGCAATGCTGGGTATTGACGGCAAAGTCGTGATGCCGAAGGGCGCGCCAAAGTCAAAAGTGGCGGCCACCTGTGATTATTCGGCGGAAGTGGTGCTCCACGGTGACAACTTCAATGAC…	ATG	TAA
hpcB	ATGGGCAAGTTAGCGTTAGCAGCAAAAATTACCCACGTGCCGTCGATGTATCTTTCTGAACTGCCGGGAAAAAATCACGGTTGTCGTCAGGCAGCCATTGATGGGCATATTGAAATTGGCAAGCGTTGCCGCGAAATGGGCGTTGACACCATTATCGTATTCGACACCCACTGGCTGGTGAATAGCGCTTACCACATTAATTGTGCCGACCATTTCCAGGGCGTCTATACCAGCAACGAATTGCCACACTTTATTCGCGACATGACCTATGACTATGACGGCAATCCGGAGCTCGGCCACCTGATTGCCGACGAGGCAGTCAAACTGGGCGTGCGCGCTAAAGCGCATAACATCCCGAGCCTGAAGCTGGAGTATGGCACGCTGGTACCGATGCGCTAC…	ATG	TAA
ompC	ATGCGTATCGGCTTCAAAGGCGAAACGCAGGTTAACGATCAGCTGACCGGTTATGGCCAGTGGGAATATCAGATTCAGGGCAACCAGACTGAAGGCAGCAACGACTCCTGGACGCGTGTGGCGTTTGCGGGTCTGAAATTCGCTGATGCAGGTTCCTTCGATTATGGTCGTAACTACGGCGTAACCTATGACGTGACCTCCTGGACCGACGTTCTGCCGGAGTTCGGCGGCGACACCTACGGCGCTGACAACTTTATGCAGCAGCGTGGTAACGGCTATGCTACCTACCGTAACACCGACTTCTTCGGCCTGGTGGATGGTCTGGACTTCGCGTTACAGTATCAGGGCAAAAACGGCAGCGTGAGCGGTGAAAACACCAACGGTCGCAGCCTGCTGAAC…	ATG	TAA
SL1344_3963	ATGTCTAATCATGATCCGCTAACGCTAAAGTTGAGCCTGCGGGAAAAATGCGCCTATGGCGTGGGCGATTTCGGCTCAAATCTGATGCTGTGTATCGGTACGCTGTATCTACTGAAGTTTTATACCGATGAACTCGGGATGCCTGCATATTACGGTGGAATTATCTTTCTGGTGGCGAAATTCTTCACCGCTTTTACCGATATGCTCACCGGCGTATTGCTGGACTCACGCCGTAATATTGGCGCAAAAGGAAAGTTTCGGCCTTTTATTCTGTATGCGTCATTTCCAGTCGCTCTGGTTGCTACTGCGCAATTCTTTGCCACTCACTTTACTTTACCCGTTAAAACAGCCTTCGCGACGGTGCTGTTTATGTTGTTCGGTCTGTTCTACAGCCTGATG…	ATG	TAA
thyA	ATGAAACAGTATTTAGAACTGATGCAAAAAGTGCTGGATGAAGGCACACAGAAAAACGACCGTACCGGCACCGGCACGCTTTCCATTTTTGGCCATCAGATGCGTTTTAACCTGCAGGAAGGCTTTCCTCTGGTGACGACGAAACGCTGCCATTTACGTTCAATTATTCACGAACTGCTATGGTTTTTGCAGGGCGATACCAACATCGCTTACCTGCACGAAAATAATGTCACCATCTGGGACGAATGGGCCGATGAGAACGGCGATTTAGGCCCGGTTTATGGTAAGCAGTGGCGTGCATGGCCAACACCGGATGGCCGCCATATCGATCAGATCGCCACGGTCTTAAGCCAGCTTAAAAACGACCCGGACTCTCGTCGTATTATCGTTTCTGCGTGG…	ATG	TAA
SL1344_4334	ATGATTGCTATCACTGGCGCAACGGGCCAACTGGGCCAACACGTTATTGAAAACCTGCTAAAAACGACGCCCGCCAGCCACCTCGTCGCGATCGTCCGTAACCCGAAAAAAGCCGCCCCGCTCAGTCAGCGCGGGATTGCCGTTCGCCAGGCGGATTACGCTAACGAAGCCGCGCTGACCACCGCCTTACAGGGCGTTGATAAACTGCTGCTTATATCATCCAGCGAAGTGGGACAACGCACCGCGCAGCACCGCAACGTTATTCAGGCCGCCATTGCCGCGAAGGTGAAATTCATCGCCTATACCAGCCTGCTACATGCGGATAAATCGCCGCTGGCGCTCGCCGATGAACATATTGAAACGGAAAAGATGCTGGCTGAGTCAGGTATTCCTCACACG…	ATG	TAA
folA	ATGATCAGTCTGATTGCGGCGTTAGCGGTGGATCGCGTCATCGGTATGGAAAACGCCATGCCGTGGAACCTGCCTGCCGATCTCGCCTGGTTTAAACGTAACACGTTAAATAAACCTGTCGTCATGGGACGTCACACCTGGGAGTCCATCGGACGCCCCTTACCGGGACGTAAAAATATTGTTATCAGCAGCCAGCCAGGCACCGACGATCGCGTGCAGTGGGTGAAGTCTGTCGATGAGGCGATTGCCGCTTGCGGCGATGTGCCGGAAATTATGGTCATTGGCGGCGGGCGCGTGTACGAGCAGTTCCTGCCAAAGGCGCAGAAGCTTTATCTGACGCATATTGATGCGGAAGTCGAAGGCGATACCCATTTTCCGGATTATGAACCGGATGACTGG…	ATG	TAA
SL1344_0695	ATGAACATTGATTTAAATGCGGATTTGGGCGAAGGTTGCGCCAGCGACAGCGAATTATTAACGCTGGTCTCCTCCGCCAATATCGCCTGTGGTTTTCACGCCGGTGATGCGCAAACCATGCTGACCTGCGTGCGCGAGGCGCTGAAAAACGGCGTGGCGATCGGCGCGCATCCCAGCTTTCCGGATCGGGATAATTTTGGGCGGACGGCGATGGTTTTGCCGCCGGAAACGGTATACGCCCAGACGCTGTACCAAATCGGCGCGCTGGGGGCGATTGTCCAGGCGCAAGGCGGCGTGATGCGCCATGTCAAACCGCACGGTATGCTCTATAACCAGGCGGCGAAAGATCCTCATCTGGCACAGGCGATTGCGAAAGCGGTACACGACTATGATCCGTCA…	ATG	TGA
pgi	ATGAAAAACATCAATCCAACGCAGACTTCTGCCTGGCAGGCGCTCCAGAAACACTACGATGAAATGAAAGACGTTACGATCGCTGAGCTTTTCGCGAACGATAGCGACCGTTTCGCTAAATTTTCCGCGACGTTTGACGATCTGATGCTGGTGGATTTCTCCAAAAACCGCATCACCGAAGAGACGCTGGCAAAATTACAGGATCTGGCGAAAGAGACCGATCTGGCCGGCGCGATTAAATCCATGTTCTCCGGCGAGAAGATCAACCGCACCGAAGACCGCGCCGTGCTGCACGTGGCGCTGCGTAACCGTAGCAATACGCCGATCATTGTGGACGGCAAAGATGTGATGCCGGAAGTGAACGCCGTACTTGAGAAGATGAAAACTTTCTCGCAAGCG…	ATG	TGA
yciA	ATGACAACAATGGATAATACTCCTCAGGGCGAGCTGGTTTTACGTACATTGGCCATGCCTGCCGATACCAATGCGAACGGCGATATTTTTGGCGGCTGGCTGATGTCGCAAATGGATATTGGCGGCGCGATACTGGCCAAAGAGATCGCGCACGGTCGGGTTGTAACCGTACGCGTGGAAGGAATGACATTTCTGCGCCCCGTCGCGGTTGGCGATGTCGTATGCTGCTACGCGCGCTGCGTTAAACGCGGTACGACGTCTATTAGCATAAATATTGAAGTCTGGGTGAAAAAAGTCGCGTCAGAACCGATTGGGCAGCGCTACAAGGCCACCGAGGCGCTGTTTATTTATGTTGCCGTCGATCCGGACGGTAAACCTCGCCCGCTCCCGGTTCAGGGT…	ATG	TAA
imm	ATGAAACTGGATATATCTGTAAAGTATTTACTGAAGAGCCTGATACCAAGCCTCATTATTCTTACAGTTTTTTATCTGGGATGGAAAGATAGCCAGGAAAATGCAAGAATGTTTTATGCGTTCATCGGATGCATTATCAGTGCCATTACTTTTCCTTTTTCAATGAGGATAATACAGAAAATGGTAATAAGGTTTACAGGGAAAGAATTCTGGCAAAAAGACTTCTTTACAAATCCAGTTGGCGGAAGCTTAACTGCAATATTTGAATTATTCTGTTTCGTTATATCAGTTCCTGTGGTTGCCATTTACTTAATTTTTATATTCTGCAAAGCCCTTTCAGGAAAATGA	ATG	TGA
mreD	ATGGTGGCGAGCTATCGTAGCCAGGGGCGCTGGGTTATCTGGCTCTCGTTTCTTATTGCGCTGTTGCTGCAAATCATGCCCTGGCCGGACGACATCATTGTTTTCCGGCCAAACTGGGTTTTGCTCATCTTACTGTACTGGATTCTGGCCCTGCCGCACCGCGTAAATGTGGGGACGGGATTTGTGATGGGTGCCATACTTGATCTCATCAGCGGTTCCACACTTGGCGTGCGCGCTCTGTCGATGAGTATTGTCGCCTATCTGGTCGCTCTGAAATTCCAGCTCTTCCGTAACCTGGCGCTCTGGCAGCAGGCGCTGGTGGTAATGTTGCTTTCACTGGCCGTGGACATTATTGTTTTCTGGGCCGAGTTTTTAGTGATCAACGTCTCTTTCAGACCG…	ATG	TAA
mdlA	GTGCGATTATTTGCTCAATTAAGCTGGTACTTTCGCCGGGAATGGCGTCGCTATCTTGGCGCAGTGGCCCTGCTTATGCTTATTGCGATGCTACAGCTAATCCCGCCCAAAGTGGTGGGGATTGTCGTGGATGGCGTAACCGCACAGCAGTTTACTCCAGGCCGAATAGCGATGTGGATTGGCACCATTGCCCTGATCGCCGTAGTGGTCTATTTGTTGCGCTATGTCTGGCGCGTGCTGCTATTTGGCGCCTCTTATCAATTAGCCGTTGAACTGCGTGAAGATTATTATCGCCAGTTGAGTCGTCAGCATCCTGAATTTTATCAGCGCCATCGGACGGGCGATCTTATCGCGCGTGCGACGAATGATGTGGATCGCGTCGTATTTGCAGCGGGCGAG…	GTG	TAG
SL1344_1427	ATGACAACCCAGTATGGATTTTTTATTGATTCCAGTCGTTGCACCGGTTGCAAAACCTGCGAACTGGCCTGCAAGGACTACAAAGATCTCACTCCCGACGTCAGCTTCCGCCGCATTTATGAGTATGCGGGCGGTGACTGGCAGGAAGATAACGGCGTCTGGCACCAGAACGTCTTTGCCTATTATCTCTCCATTTCATGCAACCACTGCGAAGACCCGGCCTGTACCAAAGTCTGCCCGAGCGGCGCGATGCACAAGCGCGATGACGGTTTTGTGGTGGTGAACGAAGAGGTCTGTATCGGCTGCCGCTACTGCCACATGGCCTGCCCGTACGGCGCGCCGCAGTACAACGCGGCCAAAGGTCATATGACCAAGTGCGACGGCTGTTATGACCGTGTC…	ATG	TAA
SL1344_0212	ATGTATGACAATCTAAAAAGTCTGGGCATTACCAATCCTGAGGAAATCGATCGTTACAGCCTGCGGCAAGAAGCCAATAACGATATCCTGAAAATCTATTTTCAAAAGGATAGAGGTGAATTCTTTGCTAAAAGCGTGAAGTTTAAGTATCCACGCCAGCGTAAAACGGTGGTGGCCGATGGCATCGGTCAGGGTTATAAAGAGGTACAGGAGATTAGCCCTAACCTACGCTATGTGATTGACGAGCTGGACCAAATCTGCCAGCGCGACCGCTCAGAACTCGATCTCAAACGTAAGATCCTCGACGACTTGCGCCACCTGGAAAGCGTCGTCGCGAATAAGATCAGTGAAATCGAAGCCGATCTGGACAAGCTTACCCGTAAGTAA	ATG	TAA
gpP	ATGAAAAACATTGCTGCGCAGATGGTTAATTTTGACCGTGAGCAGATGCGCCGTATTGCCAACAACATGCCGGAACAGCATGACGATAAACCGCAAGTTGAGCAGGTTGCTAAGGTCATCAACAACGTGTTCAGTCAGCTTATGGCCGCGTTCCCTGCTACCACGGCTAATCGCAGCCAGGCCGAGATGAACGAAATCCGGCGCCAGTGGGTTCTGGCTTTCCGTGAGAATGGCATTACCACCATGGAACAAGTAGCTGCCGGAATGCGTGTCGCCCGCCGTCAGGAACGTCCGTTTCTGCCATCGCCGGGACAGTTTGTAGCGTGGTGCCGTGAGGGGAGTGGAGCGCTCGGGGTCAGTGTTGACGACATCATGGGCGAATACTGGCGTTGGCGGAAG…	ATG	TAA
SL1344_1190	ATGACAAATAAAAAACACATTTTTTCAATTATCTTTATTGGTTCTCTTTTAACGGGGTGTGCTACAGGACCATCACCGACAGGGATTGGCTTATATACGGATGTTAAAGGGCCAATTACTGCCACGAGTCTCCCGGCAACCAAAACCGGTAAAGCGTGTGCGCAAACGGTATTGGGTATTGTAAATACCGGCGACGCATCTATTGATTCAGCGAAAAAAGCGGGCGATATTTCTTTAGTGTCGAGTGTTGATTATGAAACTACAGGCTCATATCCGTTTTATGGTAAAACCTGTGTTGTCGTAAGAGGACAATAA	ATG	TAA
yibK	ATGCTTAACATCGTACTCTTCGAACCAGAAATCCCGCCGAATACCGGCAACATCATTCGTCTTTGCGCCAATACCGGCTTTCGTCTGCACATCATCGAACCGATGGGGTTTACCTGGGATGATAAGCGCTTACGCCGCGCAGGGCTGGACTATCACGAATTCGCCGCGGTTCAGCGCCATCACGATTATGCCGCCTTTGTCGCCGCCGAAAATCCGCAGCGCCTGTTTGCGTTGACGACAAAGGGCACGCCCGCCCATAGCGCCGTAAGCTATCAGGATGGCGATTATTTGATGTTTGGCCCGGAAACGCGCGGCCTGCCCGCCAGCATTCTCGATGCGTTGCCTAAAGAGCAGAAGATTCGCATTCCGATGATGCCGGATAGCCGTAGCATGAACCTG…	ATG	TAA
fliY	ATGAAATTAGCACTGCTGGGACGTCAGGCACTGATGGGAGTAATGGCTGTAGCGCTGGTGGCGGGAATGAGCGCGAAGAGCTTTGCCGATGAGGGTTTGCTGAACAAAGTTAAAGAACGCGGCACGCTGCTGGTAGGGCTGGAAGGTACCTATCCGCCGTTTAGCTTTCAGGGCGAAGACGGCAAATTAACCGGTTTTGAAGTCGATTTCGCCGAGGCGTTGGCAAAACATCTGGGCGTTAAAGCGTCGTTGAAGCCGACCAAATGGGACGGAATGCTGGCGTCGCTGGACGCTAAACGTATTGATGTGGTGATAAACCAGGTCACGATTTCAGACGTCCGCAAGAAAAAATATGATTTCTCTACGCCTTATACTGTCTCCGGCATTCAGGCGCTGGTG…	ATG	TAA
guaB	ATGCTACGTATCGCTAAAGAAGCCCTGACGTTTGACGACGTCCTCCTTGTTCCCGCTCACTCCACCGTTTTGCCGAATACTGCCGATCTCAGCACGCAGTTGACGAAAACTATTCGTCTGAATATTCCTATGCTTTCTGCGGCGATGGACACCGTGACGGAAGCGCGCCTGGCAATTGCCCTGGCCCAGGAAGGCGGCATTGGTTTTATCCACAAAAACATGTCCATTGAGCGCCAGGCGGAAGAAGTTCGCCGCGTGAAGAAACACGAGTCCGGCGTAGTGACCGACCCGCAGACCGTCCTGCCAACCACCACGTTGCATGAAGTGAAAGCCCTGACCGAGCGTAACGGTTTTGCGGGCTATCCGGTGGTGACTGAAGATAACGAGCTGGTGGGTATC…	ATG	TGA
tdcC	ATGAGTACTACTGATAGCATTGTATCCAGCCAGGCAAAACAGTCGTCATGGCGTAAATCGGACACGACGTGGACGCTGGGTTTATTTGGTACCGCCATCGGCGCCGGGGTGCTGTTTTTCCCTATCCGCGCCGGGTTTGGCGGGCTTATCCCCATTCTTCTGATGCTGGTTTTAGCTTACCCCATTGCGTTCTATTGTCACCGGGCGCTGGCGCGTCTGTGTTTATCCGGATCTAATCCGTCCGGCAATATTACGGAAACGGTCGAAGAGCACTTTGGTAAAACGGGCGGGGTAGTTATCACGTTCCTTTACTTCTTTGCGATTTGTCCGCTGCTGTGGATTTATGGCGTCACCATTACTAACACGTTCATGACGTTTTGGGAAAACCAGCTGCAGATG…	ATG	TAA
SL1344_4518	ATGAGAAGGTTATATCTGGCGCTTATTCTGCTGTTCGCGTATTCCGGTCATAGTTACGCCTCCTGTAAACGTTCCGGTAATGAAGGCGCGATCACTATCACCCCGCCGTCGCAGCTTGTGGTGGATAGCCACGCCTATACCGCAGGCGAGGTGTTGTGGCAATCGGGCTGGGTTTCCACCTCCGAAGTCACAATGGATGGCTGTAGTCGCGATTATAAGGTCGGTTTTTTATATGAACCCGGTAGCGCGCAGTCAAATACATCAGCGACAATCAATGCGAATGACGGGAACAACACGCCGGTATTTAGCACCGGGATTTCCGGCGTGGGCGTTGCGATTAAAACCCAAACGAATGCTGGCCCTTACGATAATGTCATGCCAATCGATAATACCTACCAT…	ATG	TAA
hpcC	ATGAAGAAAATAAATCATTGGATTAACGGCAAAAATGTTGCAGGTAACGACTACTTCCAGACCACTAACCCGGCGACCGGTGACGTGCTGGCGGAAGTGGCCTCCGGCGGTGAAGCAGAGGTGAACCAAGCTGTCGCGGCGGCAAAAGAGGCGTTCCCGAAATGGGCCAACCTGCCGATGAAAGAGCGCGCGCGCCTGATGCGCCGCCTTGGCGACCTGATTGACCAGCATGTGCCGGAAATCGCGGCGATGGAAACCGCCGACACCGGCCTGCCTATTCACCAGACTAAAAACGTGCTGATCCCGCGCGCCTCGCATAACTTCGAATTCTTCGCCGAAGTGTGCCAGCAGATGAACGGCAAGACCTATCCTGTTGACGATAAAATGCTCAATTATACG…	ATG	TGA
apbE	ATGAAAATGACTTTTTGCCGGGCCGTGTGTCTGGCGGCGGCTTTTCTACTTATGGGCTGCGATGAGGCTCCCGAAACGACAACAGCGTCACCTGCCGCTCAGGTGCTGGAAGGTAAAACGATGGGGACTCTCTGGCGGGTGAGCGTGGTTGGTATCGATGCGAAACGCGCCGCAGAGTTACAGACTAAAATCCAGACTCAGCTTGATGCTGATGATTGGTTGCTTTCTACCTATAAAAATGACTCCGCGTTGATGCGTTTTAACCATTCACGCAGTCTTGCGCCCTGGCCGGTCAGCGAAGCCATGGCGGATATCGTGACCTCGGCGCTGCGTATTGGCGCGAAGACGGATGGCGCGATGGATATCACCGTGGGCCCGCTGGTCAATCTGTGGGGGTTT…	ATG	TAA
SL1344_3962	ATGAAATCTCTGAATACTCTAGTGATATTAACTTCAGTAATATCCACCTCTGTTTTTGCTGGCGCTTATGTAGAAAACCGTGAGGCCTATAACCTGGCGTCTGACCAAATGGAGTTTATGCTGCGCGTCGGCTATAACTCCGATATGGGGGCCGGAATTATGTTGACCAATACCTATACGCTACAGCGTGATGATGAATTAAAGCACGGTTATAATGAGATTGAGGGCTGGTATCCATTATTTAAACCTACAGATAAATTAACCATCCAGCCTGGGGGGTTAATAAACGACAAAAGCATTGGTTCCGGCGGCGCCGTCTATCTGGATGTTAACTATAAATTTACCCCGTGGTTTAATCTTACGGTACGTAACCGATATAATCACAATAATTATAGTTCA…	ATG	TGA
ppdA	ATGAAAAAACAACAGGGCTATACGCTCATTGAAACGGTGGTCGCGATGTCGCTCATTATCATTCTCAGCGCCACAGGACTTTATGGCTGGCAACGCTGGCAGCAGCAACAGCGCCTGTGGCAAACCGCATGTCAGGTGCGGGATTACCTGCTGCAACTTCGTGGGGACGCTCACTGGCATAACCGCGATCACATTCTTCGCGTGGTCAGCGAAGGCGGTTCATGGTGCTTTGTCAGCTCTGTTGCTACGCAAACATCGTGTACGCCATCTTCCCCCTTTGTGTTTACGCCCGACTGGCGTGATGTCGTCCTTGCCGATATCACGCCGTCGTTAGCCTTCTTTGGCTTGCGCAATACGGCATGGGCAGGGCACATCGTACTGAAAAACGCTGCCGGAGAG…	ATG	TAA
ytfF	ATGATTAGCGGCGTGCTATACGCCCTGCTGGCAGGGCTAATGTGGGGATTGATTTTCGTCGGCCCGTTAATCGTGCCGGATTACCCGGCCCTCTTACAGTCAATGGGACGCTATCTGGCGCTGGGGCTGATTGCCCTGCCGATTGCCTGGTTAGGCCGCACGCGGTTACGCCAGTTAACGCGCAAAGACTGGTCCACCGCCCTGTCGCTGACCCTGATGGGCAATGTAATCTATTACGCCTGCCTCGCCAGCGCCATTCAGCGAACCGGCGCGCCGGTGTCGACGATGATCATCGGGACATTGCCGGTCGTCATTCCGCTTTTCGCTAACGTTCTCTATAGCCAACGAGACGGCAGATTATCCTGGCGGCGTTTAGCGCCCGCGCTGGCGCTTATCGGT…	ATG	TAA
kefC	ATGGATAGCCATACTCTACTGCAGGCGCTGATCTATCTTGGTTCGGCGGCGTTGATTGTGCCGATTGCGGTACGTTTGGGCTTAGGATCGGTGCTGGGGTATCTGATTGCGGGTTGCATTATCGGTCCCTGGGGGCTACGGCTGGTGACGGACGCCGAATCTATTCTGCATTTTGCGGAAATCGGCGTCGTGCTGATGTTGTTTGTTATTGGACTTGAGCTGGACCCGCAACGGTTATGGAAGCTGCGCGCCTCGGTATTTGGCGGCGGCGCGTTACAGATGGGGGTCTGCGGCGGACTGATTGGTCTGTTCTGTATGTTTCTTGGCCTGCGTTGGCAGGTGGCGGAACTGATTGGCATGACGCTGGCGCTTTCGTCCACGGCTATCGCCATGCAGGCA…	ATG	TAA
SL1344_0694	ATGCTGAATATTATTCGCGCGGGGATTTATACCTCCGTGCAGGATAGCGGGCGTCACGGCTTTCGTCAGTCGGGGCTGAGTCACTGCGGTGCGCTGGATAAACCCGCCTTTCAGACCGCTAATCTCCTGGTCGGGAACGATGCGAATGCCCCGGCGCTGGAAATCACTCTCGGTCAACTGGTTGTCGAATTTGAAAATGAGACCTGGTTCGCTCTTACCGGCGCAGGCTGCGAGGCGCAGTTGGATGATCAACCGGTCTGGACCGGCTGGCGATTGCCGGTAAAAGCGGGTCAGCGTCTTACGCTGCATCGTCCGCTTCACGGGATGCGTAGCTATCTGGCGGTGGCGGGCGGTATTGCTGTGCCGGAGGTGATGGGATCGTATAGTACCGATCTGAAG…	ATG	TGA
ispZ	ATGAAGCAGTTTCTGGATTTTTTACCGCTGGTTGTCTTTTTTGCGTTTTATAAACTTTATGACATCTATGCGGCGACCTCCGCACTGATTGTCGCGACGGCAATCGTGCTGATTTATAGCTGGGTGCGCTATCGGAAAATAGAGAAGATGGCGCTGATTACCTTTGTTCTGGTTGCCGTCTTCGGCGGTCTGACGCTCTTCTTCCATAACGATGAATTTATTAAATGGAAGGTGACGGTTATTTATGCGCTGTTCGCCGGCGCGCTGTTAATAAGCCAGTGGGTGATGAAAAAACCGTTAATTCAACGTATGTTAGGTAAAGAACTGGCGTTGCCGCAGCAGGTCTGGTCAAAGCTGAACCTGGCGTGGGCGCTGTTTTTTATTGCGTGCGGTCTGGCT…	ATG	TAA
cib	ATGTCTGACCCTGTACGTATTACAAATCCCGGTGCAGAATCGCTGGGGTATGATTCAGATGGCCATGAAATTATGGCCGTTGATATTTATGTAAACCCTCCACGTGTCGATGTTTTTCATGGTACCCCGCCTGCATGGAGTTCCTTCGGGAACAAAACCATCTGGGGCGGAAACGAGTGGGTCGATGATTCCCCAACCCGAAGTGATATCGAAAAAAGGGACAAGGAAATCACAGCGTACAAAAACACGCTCAGCGTGCAGCAGAAAGAGAATGAGAATAAGCGTACTGAAGCCGGAAAACGCCTTTCTGCGGCAATTGCTGCAAGGGAAAAAGATGAAAACACACTGAAAACACTCCGTGCCGGAAACGCAGATGTCGCTGATATTACACGACAGGAG…	ATG	TGA
ybaO	ATGTTAGATAAAATTGACCGTAAGCTGCTTTGCTTATTGCAGCAGGATTGTACCCTCTCTTTGCAGGCGCTGGCGGATGCCGTTAATCTGACGACAACGCCTTGCTGGAAGCGGCTTAAACGCCTGGAAGATGACGGTATCCTGCTTGGCAGGGTCGCGCTGCTGGACCCGGAAAAACTGGGGCTGGGATTAACCGCTTTCGTGTTGATAAAAACGCAGCACCACAGCAGTGAATGGTACTGTCGGTTCGTGACCGTCGTCTCTGAGATGCCGGAAGTGCTTGGCTTCTGGCGGATGGCGGGGGAATACGACTATCTGATGCGAGTTCAGGTGGCCGACATGAAGCGGTATGACGACTTCTATAAACGTCTGGTCAATAGCGTCCCAGGACTGTCAGGC…	ATG	TAA
dmsC	ATGGGAAGTGGATGGCATGAATGGCCGTTGATGATCTTCACGGTCTTTGGTCAGTGCGTGGTCGGCGCGTTAATCGTTAGCGGACTGGGCTGGCTGACGGCAAAAGACGATACCATCGCCCGTCAGCGCATCGTGCGCAGCATGTTTTTTCTGTGGCTGGTGATGGGACTGGGATTCCTCGCGTCGATTATGCATCTCGGCTCGCCGATGCGCGCGTTTAACTCGCTTAACCGCGTAGGCGCTTCCGCACTGAGTAATGAAATCGCCGCAGGATCGGTGTTCTTTGCCGTAGGCGGCATCTGGTGGCTGGTGGCGGTACTCGGTAAAATGCCCCCGGCGCTGGGTAAAGTGTGGCTGCTGGTCAGTATGGCGCTCGGCGTTGCATTCATCTGGGCAATG…	ATG	TAA
SL1344_2589	ATGAGCAACATCGACAAACAGGCGCTGCGTGAAGCGGCTGTAGCAATAGAGACAGTAGCAACGCCGCAGAAATTGCTTGCGTTTCGTGTGAAGGTTACACCGCAGGTTGTGCTGGCGCTGCTGGATGAGAATCTTCAGCTCCAACGGGAAAAAGACGCAATAGAGGCCGTGGCACTTGCGCTGCGTGATGATATGCGACAGGCGCGGGAGCAACTGGAAGCTGCAGAGAAGCGTATTGCTGAACAGCGTGAGTATTACGAGGGCGTTATTGCTGATGGGAGTAAGCGCATAGCAGAACTCGAACGCAGCGAGACTCAGCTTATCAGCGAACGCGATGACGCGGAATCCGCCCTGAACGATGCCTACAAAGCCGTTATGGGCCAGGCACCAGAATGGAGC…	ATG	TGA
dcyD	ATGCCACTACATCACTTAACGCGCTTCCCTCGCCTGGAGTTTATCGGCGCGCCGACCCCGCTCGAATACCTGCCGCGATTGTCTGATTATCTTGGCCGTGAGATTTACATTAAGCGCGATGACGTTACGCCCATTGCAATGGGCGGCAATAAACTGCGCAAGCTGGAGTTTTTGGTGGCCGACGCGCTGCGAGAAGGGGCGGATACGCTGATAACCGCAGGGGCGATTCAGTCGAACCATGTCCGTCAGACGGCGGCAGTCGCGGCCAAATTGGGACTGCATTGCGTCGCCTTGCTGGAAAATCCAATCGGTACCACCGCGGAAAATTACCTGACGAATGGTAATCGCCTGTTACTGGATTTATTTAATACGCAAATTGAGATGTGCGATGCGCTAACC…	ATG	TAA
lctD	ATGATTATTTCAGCAGCCAGCGATTATCGCGCCGCAGCTCAGCGCACGTTGCCTCCTTTCCTCTTCCACTACATCGACGGCGGCGCGTATGCGGAATATACCCTGCGCCGAAATGTGGAAGACCTGTCGCAAGTCGCTCTGCGCCAGCGCGTGCTGAAAAATATGTCCGATTTAAGCCTGGAAACGACCCTGTTTAACGAAACGTTGTCGATGCCGGTGGCATTAGCGCCGGTAGGCCTGTGCGGCATGTACGCCCGTCGCGGCGAAGTACAGGCCGCCGCCGCCGCAGACGCAAAGGGCATTCCGTTCACCCTTTCCACCGTCTCCGTCTGTCCGATTGAAGAAGTTGCACCAACCATTAAGCGCCCGATGTGGTTCCAGCTTTATGTACTGCGTGAC…	ATG	TGA
cbiF	ATGTCAGAGACATTTGATCCACGCTGTGTATGGTTCGTCGGCGCCGGGCCGGGCGATCGCGAGCTGATCACGCTTAAAGGCTACCGCCTGCTGCAACAGGCGCAGGTAGTTATCTATGCCGGTTCGCTGATCAATACCGAACTGCTGGATTACTGCCCCGCGCAGGCAGAACGCTACGACAGCGCCGAACTGCATCTTGAGCAGATTATCGAGCTGATGGCGGCGGGCGTGAAGGCGGGAAAAACGGTGGTGCGTTTGCAAACGGGCGATGTCTCGCTGTACGGCTCCGTACGTGAGCAAGGCGAGGAGTTAACTCGCCGTGGTATCGACTGGCAGGTAGTGCCTGGCGTCAGCGCGTTTCTCGGCGCTGCGGCGGAGCTGGGTGTGGAATATACCGTA…	ATG	TAA
guaA	ATGACGGAAAACATTCATAAGCATCGCATCCTCATTCTGGACTTCGGTTCTCAGTACACTCAACTGGTTGCGCGCCGCGTGCGTGAGCTGGGTGTTTACTGTGAACTGTGGGCGTGGGATGTGACAGAAGCACAAATTCGTGACTTCAACCCAAGCGGCATTATTCTTTCCGGCGGCCCGGAAAGCACCACCGAAGAAAACAGCCCGCGCGCGCCGCAGTATGTCTTTGAAGCAGGCGTGCCGGTATTTGGCGTTTGCTATGGTATGCAGACCATGGCGATGCAGCTTGGCGGTCATGTAGAAGGTTCTAATGAGCGTGAATTTGGTTATGCGCAGGTCGAAGTGTTGACCGACAGCGCGCTGGTTCGCGGTATTGAAGATTCCCTGACCGCAGACGGC…	ATG	TAA
hxlA	ATGAAATTACAGCTTGCCCTGGACGAGTTAACCCTGCCTGAAGCGATGGTATTTATGGATAAGGTGGTTGATGACGTTGATATTATTGAAGTGGGAACACCCTTTCTTATTCGGGAAGGCGTGAACGCGATTAAAGCCATTAAAGAAAAATACCCGCATAAGGAAGTACTGGCGGATGCGAAAATTATGGATGGCGGCCATTTTGAATCGCAGCTGCTTTTCGACGCCGGGGCAGACTATGTCACGGTGTTAGGTGTGACCGACGTGCTGACGATCCAGTCGTGCATCCGCGCGGCAAAAGAGGCCGGAAAGCAGGTGGTGGTGGATATGATCTGCGTCGACGATCTCCCCGCACGAGTCCGCCTGCTGGAGGAGGCGGGGGCAGATATGCTGGCGGTA…	ATG	TGA
tdcD	ATGAATGAATTTCCGGTCGTTCTGGTCATTAATTGCGGATCATCTTCTATCAAATTCTCTGTACTGGATGTCGCTACCTGTGATGTTTTAATGGCGGGAATAGCAGATGGAATGAATACTGAAAACGCCTTTTTATCTATTAATGGCGATAAGCCGATAAACCTCGCACACTCTAATTATGAGGACGCGTTAAAAGCCATTGCCTTTGAGCTGGAAAAACGTGATTTAACGGATAGCGTGGCATTAATTGGTCACCGTATCGCGCACGGTGGAGAGTTATTTACGCAGTCCGTCATTATTACCGATGAGATTATCGATAATATTCGTCGGGTATCGCCTTTAGCGCCGCTGCATAATTACGCTAATTTAAGCGGCATTGACGCGGCGCGGCATCTTTTC…	ATG	TAA
hpaG	ATGAAGGGTACTGTTTTCGCCGTTGCGTTAAACCATCGCAGCCAGCTTGATGCCTGGCGAGAGGCTTTCTCTCAGCCTCCCTATAATGCGCCGCCTAAAACCGCAGTGTGGTTCATCAAGCCGCGTAATACGGTGATTCGTCACGGCGAACCCATTCCTTATCCGCAGGGAGAAAAGGTACTGAGCGGCGCGACAGTGGCGCTCATTGTGGGGAAAACCGCCAGCCGGATACGCCCTGAAGCGGCGGCGGACTATATCGCCGGGTATGCGCTGGCTAACGAGGTCAGCCTGCCGGAAGAGAGCTTTTATCGCCCGGCGATTAAAGCGAAATGTCGCGATGGCTTTTGCCCGCTGGGTGAAATGGCGCCGCTGAGTGATGTGGATAACCTCACCATTATC…	ATG	TGA
ada	ATGATGAAAAAAGCGTTACTTATCGATGATGAATGCTGGCTGCGGGTGCAGGCGCGCGATGCCAGCGCGGATGGGCGTTTCGTTTTTGCGGTGCGAACCACCGGCGTTTTTTGCCGTCCTTCTTGTCGCTCGAAGCGGGCGTTACGTAAAAATGTTCGCTTTTTTGCCAACGCGCAGCAGGCGCTGGACGCCGGTTTTCGCCCCTGCAAGCGCTGTCAGCCGGATAATGCGCGCGCGCAGCAACGGCGGTTGGATAAGATTGCCTGCGCCTGCCGTTTGCTTGAGCAGGAGACGCCGGTAACGCTGGCGTTTCTGGCGCAGGCGGTGGCGATGAGCCCGTTTCATCTGCACCGTCTGTTTAAAGCGAGCACCGGAATGACGCCGAAAGGGTGGCAGCAG…	ATG	TAG
SL1344_3961	ATGAATAAGCGATTTAATATTGATTGGGACAATGAATTAACCCAGGAACAGCTCATTAATTTGATTTTAACCGATGAAGATCTGCCAAAGCTTCGCTCACTGACCATTGGTAACTGGGGTGATTGTTGGGAAGACGAAACCTGCCAGCCTATTATTGATATGATTGTGGAGAACGCCTCCCGCTTTACTCACCTGGAATCACTGTTTATCGGTGATATGGAGAGCGAAGACTGCGAGATCTCCTGGATTAAACAAGGTGACTATTCCAGGCTCTATGCGGCGTTACCCAATCTGAAAGAACTGATTATTAAAGGCGCGTCGGATCTGCGACTGGGCGCTATACATCATGAGAAACTGGAGCACCTGGAAATCATTTCCGGCGGCATCCCTTCTAACGTA…	ATG	TGA
ppdB	GTGTCAATAACCACGCGGGGGTTCTCGCTACTGGAGGTTGTGCTGGCGATGGCGATCGGTTCCATTTTACTGCTTGGGTCCGCACGATTTTTACCGGCGCTACAACGCGAGATCTGGCACAACACGCGACAGTTATCGCTGGAAGATGAAATCTGGCAGCGAACCTATACCGTAGCGAAGCATCTTCAACGTGCGGGTTACTGTCATGGCCACTGCATTGGCGAAGGGTTACATCTTGCCGAACAGGGGCAATGCGTCATCGTTCAGTGGGACGGGAATAATAACGGGGTCTGGGATACCATACCGGCGAAAGAGGCCGACCAGACCGGGTTCCGTATGAAGGATAACGTTCTGGAGACATTACGCGGAGCAACATCTTGCCAGGGTAAGGGATGGGAA…	GTG	TGA
SL1344_4332	ATGGCTTATCGCGATCAACCTTTAGGCGAACTGGCGCTCTCTATTCCCCGCGCATCGGCGCTGTTTCGCCAGTACGATATGGATTACTGCTGCGGCGGAAAACAGACGCTGGCGCGCGCCGCCGCGCGTCACGACGTCGATATTGACATCATAGAAGCGCAACTGGCGCAGTTGGCTGAACAGCCCATCGAAAAAGACTGGCGCGCCGTTCCGCTGGCGGACATTATTGACCATATCGTTGTTCGCTATCATGACCGACATCGCGAACAACTGCCGGAGCTTATTCTGCAGGCAACCAAAGTGGAACGCGTCCACGCGGATAAGCCAAACGTCCCACGCGGCCTGACAAAATATCTCACCGCGCTGCATGAAGAGCTTTCCAGCCATATGATGAAAGAA…	ATG	TAA
yabF	ATGATCCTCATTATTTATGCGCATCCGTATCCGCATCATTCTCATGCGAATAAGCGGATGCTTGAACAGGCAGGGACGCTGGAAAACGTCGAAATACGTTCGCTTTATCACCTCTATCCCGATTTCAATATTGACGTTGCCGCCGAGCAGGAGGCGCTGTCGCGCGCGAGTCTTATCGTCTGGCAGCATCCGATGCAGTGGTACAGCGTCCCTCCTTTACTCAAATTATGGATGGATAAAGTCCTCACCCACGGCTGGGCTTACGGTCATGGCGGTACGGCATTGCATGGTAAACATCTGCTGTGGGCGGTAACGACCGGCGGTGGTGAAAACCACTTTGCTATCGGCTCCCATCCCGGATTTGACGTCCTTTCTCAGCCGCTACAGGCGACGGCGCTC…	ATG	TAG
SL1344_0693	GTGCAGCGAGCGCGTTGTTATCTGTTAGGCGAAACGGCGGTCGTCCTGGAACTTGAACCGCCGATTACGCTGGCGAGCCAGAAACGCATCTGGCGTCTGACGCAGCGTCTGGTCGATATGCCGAACGTGGTGGAAGCCATTCCCGGGATGAACAATATCACCGTGATCTTGCGGGAACCGCAAACCCTGGCGCTGGATGCGATTGAGCGTCTGCAGCGCTGGTGGGAAGAGAGCGAGGCGCTGGAACCGGACTCGCGTTCGGTTGAGATCCCGGTGATCTATGGCGGCGCAGGCGGGCCGGATCTGGCGGCGGTGGCACGGCACAGCGGTTTGAGTGAAAAGCAGGTCGTGGAGCTACATGCCTCCGTTGAGTATGTCGTCTGGTTTTTAGGCTTTCAG…	GTG	TGA
lysC	ATGACAGAGATCGTTGTTTCCAAATTTGGCGGTACCAGCGTCGCTGATTTTGACGCCATGAACCGTAGCGCGGATATCGTACTTTCCGACACCAATGTTCGTTTAGTCGTGCTTTCCGCGTCTGCCGGCATCACTAACCTGCTGGTGGCGCTGGCCGAAGGGATGGAGCCCGGCGAACGTTTCGCTACGCTCGACGCCATCCGTAAAATCCAGTTCGATATCCTTGATCGTCTGCGTCATCCGAATGTCATTCGCGAAGAGATTGAACGCCTGCTGGAAAACATCACTATTCTGGCGGAGGCGGCATCGCTGGCGACATCGGCAGCCCTGACCGATGAACTGGTCAGCCACGGCGAGCTGATGTCTACCCTGCTATTTGTTGAGATCCTGCGTGAACGC…	ATG	TAA
yciC	ATGTCTATCACGGCGAAGTCCGTTTACCGTGACGCCGGAAATTTTTTCCGAAATCAATTTATTACTATCTTGCTGGTTTCGTTGCTGTGCGCATTTATCACGGTGGTCTTAGGTCATGCCTTTTCACCCAGCGATGCGCAAATCGCGCAACTCAGTGAAGGAGAACATCTGGCAGGCAGCGCTGGCCTGTTTGAGCTGGTACAAAATATGACGCCGGAGCAGCAACAGATCCTGTTGCGCGCCTCTGCCGCCTCGACGTTTTCCGGGCTTATCGGCAACGCTATTCTGGCCGGCGGTATCATCCTGATGATTCAGTTAGTTTCAGCGGGACATCGGGTTAGCGCGCTGCGCGCTATCGGCGCCAGCGCCCCTGCATTGCCTAAACTGTTTATTCTTATT…	ATG	TAA
yagA	ATGCCAATGATACTTGTAAAGAAGAATCCCCGGGGCAAAGTGATTCGGGAGCTTAGCAGTGAGGAAGAGACTGCAGTAAAGACGGTCTGTGGACTGAAAAAGCCAGCAACCATGGCACTACATAACCTGGCCAATGATATTCTCCGGGAAATGCGTGAGTATGATGCATGGTTACAGTGTGACTGTATTCCGGGAGATTCGCCGGCCATGAATTTTGCTGCTCTTAAAAACAATACGGGTACTCTTTATCTGTCCAGTTTTAATCATGAGCATGCACCTGAATGCCCCATGTATCGTCAGTTATCCGGAAATGAAGAGGAAACATCTTCCGGAGCAAGCCGGCATCCCGTTAGCACCCGTATAAATTACAGAAACTTTTTACCACCTGATGACAGTAAT…	ATG	TGA
SL1344_0452	ATGATGAGTAGCAATTGGGTTAAAAATGCCATTAATGAAATTAACGCTGACCACCAGCGCTCGGCGGATACGCATCTTATTCGTTTGCCCCTGTCGGCATTTCCAGGTATCCAGCTTTACCTGAAAGACGAAAGCACGCATCCCACCGGTAGCCTCAAGCATCGTCTGGCGCGCTCGCTGTTCCTTTATGGGTTGTGCAATGGCTGGATTAAAGAAGGCACTCCGATTATTGAAGCGTCATCAGGCTCAACGGCGATTTCCGAAGCCTGGTTCGCGCGTTTACTGGGACTGCCGTTCATCGCCGTCATGCCCGCCTGTACCGCAAAACGTAAAATCGAACAGATTCAATTTTACGGCGGCCACTGTCATTTTGTGGAGAGCGCCTGCGAAATTTATGCC…	ATG	TAG
SL1344_3343	ATGACAACTCTGTATCTTGCTTCCGGTTCCCCGCGTCGCCAGGAATTATTGACTCAACTTGGATTTTCATTCGAGCAGGTCGTGCCTGGTATTGAAGAGCAACGGCGTGCTCAGGAAAGCGCGCAGCAGTATGTTGTTCGGCTGGCGCGCGAAAAGGCGCAGGCTGGCGTGGCGCTGGTTCCCCGTGATCTGCCGGTGTTGGGCGCGGATACGATAGTCGTGTTAAACGGCGAGGTGCTGGAAAAGCCGCGCGACGCCGCTCATGCCGCAGAAATGCTGCGTTTGCTTTCCGGAAATACGCATCAGGTGATGACTGCTGTTGCGCTTGCGGACTCGCAGCAGACGCTGGATTGTCTGGTGGTAACGGAGGTGACTTTCCGCACGCTTTCTGCGCAGGAT…	ATG	TGA
pitA	GTGATTTACACCCGTGCGATGCGTTCGCAGCTGGCGGTTGTCATGGCGGCGGTGTTTAACTTTTTTGGCGTTTTGCTGGGGGGTCTCAGCGTGGCGTATGCCATTGTGCATATGCTACCGACGGATCTCCTGCTCAACATGGGTTCCGCGCACGGCCTCGCTATGGTCTTTTCCATGTTGCTGGCGGCGATTATCTGGAACCTCGGTACCTGGTATTTCGGGTTGCCGGCGTCCAGTTCCCACACGCTGATTGGCGCCATTATCGGCATCGGTTTAACCAATGCGATGATGACCGGCACGTCAGTGGTGGATGCGCTTAACATCCCGAAAGTTATCAATATTTTCGGTTCACTCATTATCTCCCCTATTGTCGGTCTGGTATTCGCCGGCGGTCTGATT…	GTG	TAA
SL1344_1425	ATGACCACTTTTTTACAACGTGATGATTTTGCAGTAACGGCGCGTGTTCTTGGCGCGTTGTTTTATTATTCGCCGGAAAGCCACGAAACCGCTCCTCTGGTCCAGGCGCTATTAAACGACGACTGGCAGGCGCAGTGGCCGCTTGATGCCGAGGCGCTTGCGCCTGTGGCGGCTATGTTTAAGACCCACAGCGAAGAGTCGTTGCCACAGGCCTGGCAGCGTCTGTTTATCGGCCCTTACGCTCTGCCGTCTCCGCCGTGGGGTTCCGTCTGGCTGGATCGTGAGAGCGTATTATTTGGCGATTCTACATTGGCGCTACGTCAGTGGATGCGCGAAAACGGAATTCAGTTTGAAATGCAGCAAAACGAGCCAGAAGATCATTTTGGGTCGCTGTTGCTA…	ATG	TAA
SL1344_0211	ATGGCTGGCTGGCATCTTGATACCAAAATGGCGCAGGATATCGTGGCGCGCACTATGCGCATCATCGATACCAATATCAACGTAATGGATGCCCGCGGGCGCATTATCGGCAGCGGCGATCGGGAACGTATTGGTGAATTGCACGAAGGCGCGCTGTTAGTGCTGTCGCAGGGCCGGGTTGTGGATATCGACGACGCCGTGGCGCGACACCTGCACGGGGTGCGTCAGGGGATTAATCTTCCCTTACGTCTTGAGGGCGAAATTGTCGGCGTGATCGGCCTCACCGGCGAACCAGAGCACCTGCGTAAATATGGCGAACTGGTGTGTATGACTGCCGAAATGATGCTGGAGCAGTCGCGGTTAATGCACCTTTTGGCGCAGGATAGCCGTTTGCGCGAA…	ATG	TAA
SL1344_2588	ATGGCAGAAACCATTTTAGACGTGTGCTGCGGCTCTCGCATGTTCTGGTTCAACAAACAGGATTCCCGCGCCGTGTTCGCCGATATCCGCGCCGAAGAACACACATTGTGCGACGGTCGCCGTCTGGTTATCAGTCCTGACCTCATTGCTGATTTTCGCGCGCTACCGTTTGCTGATTCGTCGTTTCCGGTTGTGGTGTTTGACCCGCCGCATCTGGAACGTGTCGGACAAACTGCCTGGATGGGTAAAAAATACGGGCGATTGAACAAAAAAACATGGCGTTCTGACCTGCGAGCCGGGTTCAAAGAGGCGTTCCGTGTATTGCGGCCACACGGTGTACTCATTTTCAAATGGAACGAAACGCAGATTCCGGTTAGCCAAATTCTGGCGCTGACGGAC…	ATG	TAA
SL1344_1189	ATGGCACATTTCTCAAGACTGCAAATAACGCTTCACTGGTTAACACTGCTCCTGACAGGCATCGCATATGCTGCTATTGAGTTACGGGGGTGGGCGCCAAAAGGCTCCAGCGTTTACCTGTTTATGAAAGACACGCACTATGATATGGGCGTTCTGGTCTGGGCGCTGATGTTTTTACGGTTATATCTTAAACACAAATACCCGGATCCGGTCATTACGCCTCCCCCTCCTCACTGGCAGCACGTAGCCGCTAAATTAATGCATATCGCGCTTTATCTCACTTTTCTCGCCTTACCGCTGCTGGGCGTCGCGATGATGGCGTCAGGCGGGAAAAGCTGGAGCTTTTTTGGTTTTACTGTACCGGTATTTTTGACGCCAGATAGCACCCTAAAATCGGAT…	ATG	TGA
glpG	ATGTTGATGATTACTTCCTTTGCGAATCCTCGCGTGGCGCAGGCATTTGTTGATTACATGGCCACCCAGGGCGTCATTCTTACTATTCAGCAACATAATCAAAGCGATATCTGGTTGGCAGATGAATCGCAGGCCGAACGTGTGCGGGGCGAGCTGGCGCGGTTTATAGAAAATCCCGGCGATCCGCGTTATCTGGCGGCTAGCTGGCAGTCCGGGCAGACTAACAGCGGGCTACGCTATCGCCGTTTTCCCTTTCTCGCCACGCTGCGTGAACGAGCCGGCCCTGTTACCTGGATCGTGATGCTCGCCTGCGTGCTGGTCTATATCGCGATGAGTCTCATCGGCGATCAGACGGTGATGGTGTGGCTGGCGTGGCCGTTCGATCCGGTTTTAAAATTT…	ATG	TGA
lctR	GTGATTGTGATGCCAAAACGCCTGTCAGACGAGATTGCCTCTCGCGTGCGGGCGCTGATTGAAGAACAAAACCTGGAAGCGGGCATGAAATTGCCCGCCGAGCGCCAGTTGGCTCTACAGCTTGGCGTATCACGCAACTCTTTACGCGAAGCGCTGGCGAAGCTGGTCAGTGAAGGCGTGCTGGTGAGTCGTCGCGGCGGCGGGACATTTGTCCGCTGGCAGCACGAAACCTGGTCTGAACAGAATATCGTGCAACCGCTGAAAATGCTGATGGCGAACGATCCGGACTACAGTTTCGACATTCTGGAAGCCCGCCACGCCATTGAAGCCAGTACGGCCTGGCACGCCGCCATGCGTGCCACCGCTGCCGACAAAGAGAAAATCAGACTCTGCTTTGAT…	GTG	TGA
yecS	ATGCAAGAAAGTATCCAACTGGTTATTGAATCGCTGCCGTATTTGCTTAAAGGCGCCGTCTTTACCCTGCAACTGAGTATTGGCGGTATGTTTTTTGGTCTGCTGCTGGGATTTGTGCTGGCGCTGATGCGGATGTCTCCGCTATGGCCGGTTCGCTGGCTGGCGCGCTTTTATATCTCGATTTTTCGCGGTACGCCGCTTATCGCCCAGTTATTTATGATCTATTACGGCCTGCCGCAATTTGGTATTGAGCTGGACCCTATCCCGGCGGCGATGATTGGTTTATCGCTCAATACCGCGGCTTACACGTCCGAGACGCTGCGCGCGGCGATCTCGGCTATCGACAAGGGACAATGGGAAGCGGCGGCGAGCATTGGCATGACGCCGTGGCAAACGCTA…	ATG	TGA
SL1344_2470	TTGTATCTTGCCGTGGTCGTTGATTTGTTCTCGTGCAAAGTTATCGGTTGGTCAATGCAACCACGAATGACAAAAGATATTGTTCTGAATGCGCTTCTGATGGCCGTGTGGCGACGTCATCCCCAAAAACAGGTGCTGGTTCAGTCTGATCAGGGTAGTCAGTACACCCGCTATGAATGGCTGAAATTGCACGGACTGGAGGGCAGTATGAGCCGTTGTGGCAACTGTCATGACAATGCGGTTGCAGAAAGCTTTTTCCAGCTACTGAAGCGTGAACGGATAAAGAAAAAGATCTACCAACGACTCAGAAGTGTCCAGGTTATCCGTGGCGATTCAGCCCAAATAAGGGGTATTTAA	TTG	TAA
tdcE	ATGAAGGTAAATATCGATACCAGCGATATGCTGTATGCCGAAGCATGGCGTGATTTTAAAGGTACGGACTGGAAAGAAGAAATTAATGTCCGTGATTTTATTCAGCATAACTATACGCCCTATGAGGGGGATGAATCTTTTCTCGCCGACGCGACGCCAGCGACCACGGCGCTGTGGGAAAAGGTGATGGCGGGAATACGTATCGAGAACGCGACCCATGCGCCGGTGGATTTCGATACCAACATCGCGACGACGATTACCGCGCACGATGCGGGGTATATTGAAAAAGAGCTGGAAAAAATCGTCGGTTTACAAACGGATAAGCCGCTTAAACGCGCTTTGCATCCGTTTGGCGGCGTTAACATGATCAAAAGTTCATTCCACGCTTATGGCCGCGAA…	ATG	TAA
creD	ATGTTGAAATCCCCCCTGTTGTGGAAAATGATTACGTTAGGCGGCGCCATGATCCTGCTGTTAATTCCCCTGATGATGGTACGGCACACCATCGTGGAGCGTGCTGATTATCGAAGCCATGTAGAAGCCGCTATTCGTCAGAGTACCAGCGGCCCACAAAAGGTTGTCGGCCCGCTGGTGGCGATTCCGGTGACAGAGCTCTATACCGTGCTGGAAGAGGAGAAAGAGGTCCAGTATAAGCGCAGCTATCTCTATTTTTGGCTGCCGGAGTCGCTATTGGTTGAAGGCAATCAAAACGTTGAAGCGCGAAAAATAGGTATTTATCAGGGGCAGGTGTGGCATACCGATATGGCGATAAAGGCGGAGTTTGATGTGGCCCGTCTGCATGAGCTGAACAGA…	ATG	TAA
hpaR	ATGCATGATTCATTAACCATCGCATTGCTTCAGGCGCGCGAAGCGGCAATGACCTATTTCCGCCCCATCGTTAAAAGCCACAATCTGACCGACCAGCAATGGCGCATTGTGCGAATCCTGGCCGATAGCCCCTCTATGGATTTTCACGAGCTGGCCTTTCGTACCTGCATTTTGCGTCCAAGTCTGACCGGAATATTGACGCGCATGGAGCGAGACGGACTGGTGTTGCGACTCAAGCCGGTTAACGATCAGCGTAAGTTATATGTCATGTTGACGGAGCAGGGACAAACGTTGTACGCCCGTGCCCGAAGCCAGGTAGAAGAGGCTTATCGAAAAATTGAGGCCGATTTCACGCCCGAAAAAACACAGCAATTGATGCTGCTGCTGGACGATCTTATT…	ATG	TAG
rplC	ATGATTGGTTTAGTCGGTAAAAAAGTGGGTATGACCCGCATCTTCACTGAAGATGGCGTCTCTATCCCAGTAACCGTAATCGAAGTTGAAGCAAACCGTGTTACTCAGGTTAAAGACCTGGCTAACGATGGCTACCGCGCTGTTCAGGTTACTACGGGTGCTAAAAAAGCTAACCGTGTCACCAAGCCGGAAGCGGGTCACTTTGCTAAAGCTGGCGTAGAAGCTGGCCGTGGTCTGTGGGAATTCCGTCTGGCTGAAGGCGAAGAATACACCGTAGGTCAGAGCATCAGCGTTGAACTGTTTGCTGACGTTAAAAAAGTTGACGTAACCGGTACCTCTAAAGGTAAAGGTTTCGCTGGTACCGTTAAGCGCTGGAACTTCCGTACCCAGGACGCTACT…	ATG	TAA
alkB	ATGCTGGATCTATTTGCTGATGAAGCGCCCTGGCAAGAGCCCCTGGCGCCTGGCGCGGTGGTGTTGCGCCGCTTTGCGTTTCGCGCGGCGCAGTCGCTATTAGACGATATCGGGTTTGTCGCCAGTCAGTCTCCGTTTCGTCAGATGGTGACGCCGGGCGGCTACACCATGTCGGTGGCGATGACCAACTGCGGCGCGTTAGGGTGGACTACCGATCGTCACGGTTATTGTTATGCCGTGCGCGATCCGTTGACTGATAAACCCTGGCCTGCGCTGCCGTTATCGTTTGCCAGCGTATGTCGTCAGGCGGCAATCGCGGCAGGGTATGCGAGCTTCCAACCGGACGCCTGCCTGATCAATCGCTACGCGCCCGGCGCAAAACTGTCGCTGCATCAGGAT…	ATG	TAA
SL1344_3960	ATGTGCACATTCCCCTACTCAACGATAAAGGGATTTATTGTGATTACGCTCATTGGCCCCCATCAGAGCAAGCGCACGCATTATTTTATGCAGGCTGCCGCCGTACTTGGGGAACCCGTCACGGCGCTGACTCATCCGCAAGCGCTGGACGCTTCGCTGACCTCTGGCATCGTTAAAATCGACCCGCCAGTACACAGTGAAACAGACATCCGCAAAATAAACGCGATCGGTCTGGACTATATCCATTTTTTGCAGAACATGGCGGCGCGTCCTGGCGTCACCTGGCTTAACCATCCGGCGGGCCTCATTCACCTGTTGGATAAAAAACGCTGCAAGCGGCGCTTACTGGAACACGGCATCCCCACGCCGCCGTTGGTAGCGGAAGACGTAAAAAGTTTT…	ATG	TAA
SL1344_2976	GTGAATCGGGAACGTGGCGCTTCTTCGCTAATACTGGCGCTTTTAATACTGATTCTGGGCAGTCTGCTACTGCAAGGCGTAAATCAGCAGCAGGCCAGCTATGCCGCCCGCGTGACGACGCAGAGCCTGGCGATACAACGCCAGGCGCTTGTGCAGTCGGCGCTGGAATGGGGACGGGGGCAGCTATGGTCAGGCGTAACCGAAATGGAATGTCGGCGCTATTCCTCTTCAGGAGCGAGAGTCTGTTTGCGGAGATTATCGGGGGATGAGGTGGTGATGGCGGCGCAAGATGACGGCATGACGTTATGGCGTTTGGGCAACGTCATTCAGGGAAGCATTGTCTTTTCTCCCCACGGCTGGAGCGATTTTTGTCCGTTAAAAGAGGTGGCGTTATGTCGC…	GTG	TGA
cycA	ATGGTAGATCAGGTAAAAGTCGCAGCCGACGAACAGGCTCCGGCTGAACAGTCGCTACGGCGCAATCTTACAAACCGTCATATACAGCTTATCGCTATTGGCGGCGCTATTGGTACCGGTCTGTTTATGGGATCGGGTAAAACGATCAGTCTCGCCGGACCGTCGATCATTTTTGTGTATATGATCATCGGTTTTATGCTTTTTTTCGTGATGCGCGCCATGGGGGAATTGCTGCTCTCGAATCTGGAATATAAATCGTTTAGCGATTTTGCTTCCGACCTGCTTGGCCCCTGGGCGGGATATTTCACCGGCTGGACGTACTGGTTTTGCTGGGTAGTGACCGGTATGGCTGACGTGGTGGCGATTACCGCCTACGCGCAGTTCTGGTTTCCCGGCCTT…	ATG	TAA
SL1344_0084	ATGAGTAATAAAAAAAATCTGTCCGCAGAAGAGACGGATCTTACGCGTAGGAAACTGTTAACCAGTGCCGGTATTCTTGCCGCAGGCGGTATGTTATCCGGCGCGGTAAAGGCTGATGAAAAATGCGCCGTCAAGGCGAAACCGGCGTGGGATAAACCGTTTACTGGCGAAATCCCGGAAAAATTGCCAGAAGGATATAATATTCTGTTAGTCGTGACCGACCAGGAGCGTTTTTTTCCTACGTTTCCTTTCCCGGTACCCGGCAGAGAGCGGCTCATGAAAACGGGGGTGACATTCTGTAATCATCAGAATACCAGTAATGTCTGTACGCCTTCCCGCTCCGTATTGTATACCGGCTTACATATGCCCCAGACAAAGATGTTTGATAATTTGGGATTA…	ATG	TAA
SL1344_0692	ATGAAAAACACCGAGCTGGAACAACTGATTAACGACAAGCTGAACAGTGCGGCAATAAGCGATTATGCGCCGAATGGTTTACAGGTCGAAGGAAAAGAGACGGTACAGAAAATCGTTACCGGCGTGACCGCAAGTCAGGCGCTGCTCGATGAGGCGGTGCGTTTGCAGGCCGATGCGGTCATTGTTCATCATGGTTACTTCTGGAAAGGCGAGTCTCCGGTTATTCGCGGCATGAAACGCCGTCGCTTAAAAACGTTACTGGCAAATGATATTAACCTTTACGGTTGGCATCTGCCGCTGGATGCGCACCCTGAGCTGGGCAACAATGCGCAGTTGGCGGCGCTATTGGGCATTACCGTGAAAGGAGAAATTGAGCCGCTGGTGCCGTGGGGAGAGCTC…	ATG	TAA
SL1344_1664	ATGAGCGTTCTTAACCCATGCATGACATGCGGTGCCTGTTGTGCCTATTTTCGTGTCTCCTTTTATTGGGCTGAAGGCGACGATGCCAGCGGACGCGTTCCGGCGTCATTAACCGAGCCTGTTACCCCTTTTTTACGTTGTATGGCCGGTACCAACCAAAAACAGCCGCACTGTAAAGCGCTAATTGGCACGCCGGGTGAAAACGTCAGTTGCGCTATTTATGAAAACCGCCCTTCAACCTGTCGCGAATTTTCGATATCGGGCGAAGGAGGCGAAGTGAATGAGGCGTGTAATCGCGCCCGCGCGCGATACGGATTACCGCCGCTTTACAAAGATATGCTTTTCCATACAACTGCTGATGCTGCCACTGTAGAGTTATCCAGGGTACAATTGCCCGCA…	ATG	TAA
yafB	ATGGGAAAAAATCAGGAAGAAAGGAAAACTCCCGTCATTGTGGTGAAAAAACGTCGTACTTTTTCGCTACCGTCCTTATCCGAAAAAACAGATATTATCGCACCTGTATTTACTGAACAGACGGCAGAATCAGCCCCCGCCGGAATAAATTCATCTGCCGTCGAAACACATATCCCCGAAGCGCCAGCCAGGAAGAAGAAAAAGAAAAGACACCGTTTTCCACGTCCCTCCCACTGGACCCGTGAGTATACTCACGAGTGCGTGGAAAAAATAAAGGCCCTGTTTCCTCATCTTCGTGCTGAAGGTGGTGGATTTATTCCCCTGAAAATTGGCATAAACAATGATATTTCGGCATTTCTGGCAGAACACCCGGAGACAGAACTGACCATGGACGAATGG…	ATG	TAA
SL1344_0451	ATGGCCCGTCTGGCAGCATTTGATATGGATGGCACGTTATTAATGCCCGATCACCATTTGGGTAGAGAAACGATCGCCACGCTGGCGCGTCTGCGCGAACGCGATATCACCCTGACATTCGCTACGGGTCGTCATGTGCTGGAAATGCGGCATATTCTGGGGACGCTTTCACTGGATGCTTATCTTATTACCGGTAACGGGACGCGAATTCACTCGCTGGAAGGCGACGTGCTGCATCGTCAGGATCTCGATCCTCAGGTTGCCGATACGGTGATGCACCATGCCTGGGATACCCGAGCCAGTATGCATGTGTTTAATGACAACGGCTGGTTTACAGGCCAGGAGATCCCCGCGCTACTCCAGGCGCACGTCTACAGCGGCTTTCGTTATCAGGTTATC…	ATG	TGA
SL1344_1424	ATGCACACCCTCACCCTAAAACGTGTACTTGGGTTCACTATCGTCATTTTGCTGTTACTGGCGCTGTTTATCTGGGGAATCGGTCTGGAGACGCTGAAAGCGCGTCAGGTCGATCTGCTGTATCTCGGACAACGGCATTTGATGCTGGTCTTTACGTCCATGTTTTTTGCTTTACTGGTCGGTATCCCGAGCGGGATTTTACTCAGCCGACCTGCGGCAAAAGGATTTGCTGAATATGTCATGCAAATCTTTAATGTTGGTAATACCTTGCCGCCGCTGGCCGTTCTGGCCTTAGCGATGGTGATTATCGGGATCGGCGATACGCCCGCCATTGTCGCGCTATTTCTGGCCTCCCTTCTGCCTATCGTCCGCAATACCTATGCGGGCCTCTGTTCCGTT…	ATG	TGA
SL1344_2587	ATGACCACTATTACCAAAGAATGGCTACAGCAAACCATCGCTGAATTTGAAAACACTCGCGACGATATTCCGTTTGGCCTCGACGATGACGACGCCAAAATTCTTATTGTGCTGAAGCGTGCGCTTGCATCGCTGGAACGCGAACGTATTCGCCGCGAGCACGCCGAGTGGTCAGATAAGACGTTCGGCGATGTCGGTCCAGTAGGACCACTGAAGCACCTCTCGAAAGAAGCATTAGAGGCCGCTGCCGACCCATCCGATCCGCTTGAATGGGCTGATATGCAGTTTTTATTGTGGGATGCTCAAAGGCGTATGGGTATTTCTGACGAATTCATTACCAGGGCGATGATAGAAAAGCTGGAGATAAATAAGTCTCGCCAGTGGCCTGAGCCGAAAGAC…	ATG	TAA
SL1344_1880	ATGAGTGCGATCGAAGTTACCAACCTGGTCAAAAAATTTCATGGTCAAACGGTGCTGCACGGTATTGACCTTGAGGTGAAGCCCGGAGAAGTCGTCGCCATTATCGGCCCGAGCGGCTCAGGGAAGACAACGTTATTACGCTGTATTAACCTGCTGGAACAACCGGAAGCGGGCACCATTAAAGTGGGCGATATTATCATCGATACCGCCCGCCCATTCAGCCAGCAAAAAGGGTTGATTCGCCAGCTACGCCAGCATGTCGGCTTTGTCTTTCAGAGTTTTAACCTGTTCCCGCATCGTACCGTGCTGGAAAATATCATTGAAGGTCCGGTGATTGTAAAGGGAGAGCCGAAAGCCGAGGCGACGGCGCTGGCGCGGGAACTGTTAGCCAAAGTCGGG…	ATG	TAA
lctP	ATGAACCTCTGGCAACAAAACTATGACCCGGCGGGTAATATCTGGCTTTCCAGCCTGATCGCATCGCTCCCAATCCTGTTCTTCTTTTTCGCCCTGATTAAACTCAAGCTGAAAGGCTATGTTGCCGCTTCGTGGACGGTGGTTATCGCGCTCGCCGTCGCGCTGCTGTTCTATAAAATGCCGGTCGATCACGCGCTGGCATCGGTCGTGTATGGCTTCTTCTACGGGCTATGGCCGATAGCCTGGATAATCATCGCCGCGGTCTTTGTCTATAAAATTTCGGTCAAGACCGGGCAGTTTGACATTATTCGCTCGTCAATTCTGTCGATTACCCCCGACCAGCGTCTGCAAATGCTGATTGTCGGCTTCTGCTTCGGCGCGTTCCTTGAAGGCGCGGCA…	ATG	TGA
cbiG	ATGAATACCGTAAAGCCTGAATCCATTGCGTTGTTTTGCCTGACGCCCGGCGGCGTGGCGCTGGCAAAGAGACTCGCCGCGATGCTGCCGTTAACCTGCTTTACCAGTGAAAAACTGCGGGAAGAGGGATTTATTCCCTTCGATGGCGGATTCGCTAATACCGCCCGGCAGGCTTTTACCACTTATACCGCGCTTATTTTTATCGGCGCGACCGGCATTGCCGTTCGTGTCCTGGCGCCGTTAGTGAACGACAAGTTCAGCGATCCGGCGGTGGTCGTCATTGATGAACGAGGTCAGCATGTCATTAGCCTGCTTTCCGGTCATGCGGGCGGGGCCAATGCCTTGACGCGCTACCTGGCAGGAATGTTAGGCGCCGATCCGGTGATTACCACGGCAACG…	ATG	TGA
SL1344_4471	ATGTTGGGTTTTAATCAGGACGAGTACCTGACGAGTGCTCGTGAGATCATCGCTGCGCGCCAGAAGGCAGAACAGGTTGCTGACGAGATTTATCAGGCCGGGTTCAGTTCTTTATTTTTCGCCTCTGTTGGCGGTTCACTGGCGCCAATGATGGCAATTAATGAATTTGCCAAAGAATTAACAACGTTGCCGGTTTATGTTGAGCAGGCGGCAGAATTAATTCATAAAGGAAATAAGCGGCTGAATAAAGACTCTGTGGTTATTACGCTGTCTAAATCCGGCGATACCAAAGAATCGGTGGCGATCGCCGAGTGGTGTAAAGCGCAGGGAATACGCGTAGTCGCTATTACCAAAAATGCGGACTCTCCGCTGGCGCAGGCGGCGACATGGCATATTCCG…	ATG	TAA
SL1344_2469	GTGGACGTACTTCTAATGAGAGATATTGAGAAAGAAATTATCGATTTTATCGATCAGGAATATAACACTAAAAAGTACTTTCTCTGTGGGCCAAAGCGAATCATCACGCTTGATACCAGTATTAGGGATGATCTTAAACTCGTTTTTGAAGATAGTGAAGAACTTCTACAAAAGTACTTCAAGCGTTGGAATGTAGATTCAGAAGGATTTGACATACTCAACTATCTGAATCCAGAGTACTTTGGAAGTAAAGAGCCTGATCCGCGTAAGCCACTAACGGTTGGTATGCTCGTTGAAAGTGCTAAAGCTGGGCGTTGGTTATATAGTTGA	GTG	TGA
SL1344_2738	ATGCTGGAGTTTCATAATGTCCCTTTAAAAACCATTTTAAGAAGAGCTATTATGTCCCTCCCTACAAATTTTAATGATATTCTTCGTTTTTTTGAAAAAGATTACGATACAGCCAAAGAAGATAATGCTTTAAGTGCACGCGGCCAATTTCTGCAACTTTACCCCCTTAATCACCTAAAAAAAATGACGCTTGATGACTATGTCATCGGCAAAGGTACAGCTTCATTTTGTGCTTGTGTTGAAGTAAAAACCAGAACATGGGCAAATATGCAAGGTGCGACGGCGCTCAAATTTGGTATTTATTATGGAAAATCAAAATCAGATCCAACCGTCCGCTATCGTTTTACTCAGAAATTTGGCGATGATGATAGTACTAATAAAGAAGTTTTCGCTAATGTT…	ATG	TAA
tdcG	ATGATTAGCGCATTTGATATTTTTAAGATTGGCATTGGACCTTCAAGCTCCCATACCGTAGGGCCAATGAATGCAGGAAAATGTTTTATCGATCGGCTGATCGACAGCGGCGACCTGCCGCGAACGACGCGCATCACGGTTGATCTTTACGGATCGCTATCGCTGACGGGCAAAGGCCACGCGACCGATACCGCCGTCATTATGGGCCTGGCGGGCAATACGCCGCAGGATGTCAATATTGATAGCATTCCGGCGTTTATCCAGGAGGTTGCCCGCAGCAGCCGTTTATCGGTGGCGGGTGGCGCGCATGTGGTGGATTTTCCCGTCGCCGACAGTATTTTCTTTCACGCTGAAACCCTGGCGCGCCATGAAAACGGTATGCGTATTACCGCCTGGAAC…	ATG	TAG
hpaB	ATGAAACCTGAAGATTTTCGTACTGATAACAAGCGTCCGTTAACGGGCGAAGAGTATTTAAAAAGCCTGCAGGACGGGCGGGAAATTTATATTTACGGCGAACGCGTTAAAGATGTTACGACACATCCGGCATTCCGCAATGCCGCAGCCTCTGTCGCACAACTGTATGACGCATTACATAAACCGTCGATGCAAGATACCCTATGCTGGAATACCGATACCGGCAGCGGCGGTTATACGCATAAATTTTTCCGCGTGGCGAAAAGCGCAGACGATCTGCGCCAACAGCGTGATGCTATCGCCGAGTGGTCACGCCTGAGTTACGGCTGGATGGGACGCACACCGGATTACAAAGCCGCCTTTGGCTGCGCTCTGGGCGCTAACCCAGCCTTCTACGGC…	ATG	TAA
yojI	ATGGAACTTCTTATTCTTGTCTGGCGGCAGTACCGCTGGCCATTTATTAGCGTGATGGCGCTGAGCCTCGCCAGCGCGGCGCTGGGGATTGGCCTGATCGCGTTTATCAATCAGCGCCTGATTGAAACGGTGGACACCACCGTCATGGTGCTGCCGGAATTTCTCGGTCTGCTCCTGTTACTAATGGTCGTCACATTAGGTTCCCAACTGGCGCTCACCACTCTGGGACACCATTTCGTTTACCGCCTGCGCAGCGAATTTATCAAGCGCATTCTGGATACGCACGTTGAACGCATTGAGCAACTGGGCAGCGCCTCTTTACTGGCCGGTCTGACCAGCGATATTCGCAATATTACTATCGCCTTTGTGCGTCTGCCTGAGCTGGTGCAGGGCATTATC…	ATG	TAA
SL1344_3959	ATGGATGAAGTCCCCGTCTCGCTGCACGCGTCGATTGACACAGGCGATGGCGAATTCGATATGAATGCGCTAATTAGTAATAACGCTCATATTCTTTTTATTGTGCTGGACTCGTTACGCTACGACATTGCGCTTCAGGAACAAACCGCCGGAAATACGCCCAACCTTAATCATTATGGACAATGGACGAAATGCGAAGCGGCCGGTAATTTTACCTGGCCTTCGCATCACGCCATGTTTTCAGGTTTTATGCCAAAACCTATTGATGATACCGTTAATCAGACCATGCTGTTTTTCCCAAAAGATATCGGACTTGGTCGTAAAGGCCCGAAAAATGCATTTGCCTTTGATGACGCAACATGGATAAAAAGTCTGGAAAATAAAGGCTACCAGACCATC…	ATG	TAA
ppdC	ATGTCGCATCCCCTGAATTTACAACGCGGGTTTAGCCTCCCGGAAGTTTTAGTGGCGATGGTTCTAATGGTAATGATCGTCACCGCGCTGTCAGGCTATCAGCGGGTATTAATGCACAGTTTTGCATTACGACACCAGTATCTCCAGATCTGGCGGCAGGCGTGGCAGCAAACGGCGCTGTATCCATTTTCGCCTGCTGACGACTGGAAGGCCAACCGGATGCAGACAACGCAATCGGGATGTGTCAGCATCAGCGTCACGATGGTTTCACCCTCTGGCAGGCAGGGGCAGATGACGCGCTTGCATTGTCCAAATCGTTAA	ATG	TAA
fklB	ATGCTGCCCGCTACTTTTTTGATATCCGATGAAGGAAAAATAATGGCCACCCCGACTTTTGACACTATTGAAGCGCAAGCGAGCTACGGCATTGGTTTGCAGGTAGGGCAGCAGCTCAGCGAATCCGGTCTTGAAGGGCTGTTGCCTGAAGCGCTGGTTGCAGGCATTGCTGATGCGCTGGAAGGTAAACACCCGGCGGTTCCTGTTGATGTGGTGCATCGTGCGCTGCGTGAAATTCATGAGCGTGCGGACGCGGTGCGTCGTGAGCGTTTCAAAGCGATGGCGGCCGAAGGCGTGAAATACCTGGAAGAAAACCGCGAAAAAGACGGTGTGAACAGTACTGAGTCTGGTTTACAGTTCCGCGTTCTGACGCAGGGCGAAGGCGCGATTCCGGCGCGT…	ATG	TAA
SL1344_0083	ATGAAAAAACGCATTATTGCCGCCGCATTACTGGCAACGGTTGCTTCATTCAGCACACTTGCGGCAGAGCAGGTCTCTAAACAAGAAATCAGCCACTTCAAACTGGTTAAGGTCGGCACCATAAATGTGTCCCAGAGTGGCGGACAGATTTCCTCACCCTCTGATCTACGCGAAAAACTGTCAGAATTAGCCGATGCGAAAGGCGGAAAATATTACCATATTATCGCTGCACGTGAGCATGGTCCGAATTTTGAAGCCGTTGCCGAAGTTTATAACGATGCGACGAAATAA	ATG	TAA
SL1344_0691	ATGAATAAACAAGCATCTCAACCCCGCGCTATTTACTACGTTGTCGCCCTGCAAATTTGGGAGTACTTCAGCTTTTATGGTATGCGCGCCCTACTGATTCTTTATCTCACCAATCAGCTAAAATACGACGATAACCACGCCTATGAGTTATTCAGCGCTTATTGTTCGCTGGTCTACGTAACGCCGATTCTTGGCGGCTATCTGGCGGATAAGGTGCTTGGCAACCGAATGGCAGTCATGCTGGGCGCATTTTTAATGGCTATAGGTCATTTAGTGCTGGGCGCCAGTGAGATCGCGCCGACATTCCTTTATCTGTCGCTGGCGATCATTGTCTGCGGCTACGGCCTGTTTAAATCGAATATTAGCTGCCTGCTGGGCGAACTGTACCAGCCGGAAGAT…	ATG	TGA
SL1344_4155	ATGATTCAGAAATCAAAAGAAATGGTTCGGCTTCCGGAGATTATTAACGATCTGGCGTTTCATGCGTCGCAGGTGCTTATTGAAAGCATGAATATTGATAGCGCGTCAGCCGAAAATGCCGGTCAGGCAATTGCTGACAGAATGATGCGCAACTGGGGCGGGCAAAGCATTTATTTTCCCAAAGGTATCTCTGGTCGGGCTTCGGAACGGGATTATCAGATTTACAGCGAGTGCGATGGGCGTAATTATGCGGAGCTGGCCAAAAAGTACAATTTGACACTGCAGTGGATCTATAAAATCGTTAAGCGGGTCCACACGGAAAAACAGCACCAGCGGCGTATGCTGTAA	ATG	TAA
SL1344_1663	ATGAAAAAATTTACAGTGGCGGCACTGGCGTTAACAACTCTTCTCTCAGGCAGCGCGTTCGCGCACGAAGCCGGAGAATTCTTTATGCGTGCAGGTCCGGCAACCGTCAGACCTACAGAAGGGGCGGGTGGTACGCTGGGGCATTTAAACGGGTTTGATGTGAGTAATAACACGCAACTCGGCCTGACATTCACTTACATGGCGACGGACAATATCGGGGTTGAATTGCTGGCGGCTACGCCGTTCCGCCATAAGGTGGGTACGGGCGCGACGGGCGATATCGCCACGGTCCACCTGTTACCGCCAACGTTAATGGCGCAGTGGTACTTCGGCGATTCCAGCAGCAAAGTGCGTCCTTATGTCGGCGTGGGGGTGAACTACACCACCTTCTTCGATAAC…	ATG	TAA
yafA	ATGTGTGATTCAGAAGCGGAGAAGATTTTATTCATCCTGAATAAACATGAACGGGCATACAGACGCCTGATCCCCGTATATATTTTTTTAGCTATAGTATTATGGATTTTACCTATTCTCCTGATTGTATACCTGTATTTCTGTATAGTTGACAATGAGTTTCTCAGAATCGGTTTCTGTATTGCATGGACAGCATACTACTTTCTTTCGCTTTTCAAGTATTTTGTAAAATACTTCTTTCCTCTCGATCGTGAAGATTTGCTTAAACTGATGGAGCTCGCCAAAGATTCTCCTGATGCGAAACAGGAGCTTCTTGAGCGTCTTTTGTCCGGAAAAAGAATGACCGGGCGGGATGAAATGGATATCAAGCGCATTCTAAAAACAAAGGAAGCACTTGAT…	ATG	TGA
rnG	ATGACGGCTGAATTGTTGGTAAACGTAACGCCATCGGAAACGCGCGTGGCGTACATTGATGGCGGTATTCTTCAGGAAATCCATATTGAGCGCGAAGCGCGACGCGGAATCGTAGGCAATATCTACAAAGGTCGTGTAAGTCGTGTACTTCCAGGTATGCAGGCGGCTTTTGTAGATATTGGGCTGGATAAAGCCGCATTTCTTCACGCTTCCGACATTATGCCGCATACCGAATGCGTGGCGGGCGACGAGCAAAAACAGTTTACCGTGCGCGATATCTCCGAACTGGTGCGTCAGGGACAGGATCTGATGGTGCAGGTAGTGAAAGATCCGCTCGGCACGAAAGGCGCGCGTTTGACCACGGACATCACGTTGCCCTCCCGTTACCTTGTTTTTATG…	ATG	TAA
ybaE	ATGAGGCTACTGAATCGGCTTAATCAATATCAACGCCTCTGGCAGCCTTCCGCCGGGGAAACGCAACATGTCACCGTTAGCGAACTGGCCGAACGCTGTTTTTGTAGCGAGCGCCATCTGCGAACGCTGCTGCGTCAGGCCCAGCAGGCAGGTTGGCTAAGATGGGAGGCGCAGTCCGGGCGCGGGAAACGTGGACGGCTCCAGTTTCTGGTCACGCCGGAATCGCTCCGCACCGCCATGATGGAACAGGCGCTGGAAAAAGGGCAGCAGCTCAACGTACTGGAACTGGCGCAGCTGGCGCCGGGCGAGTTACGGGCGATGCTCCAGCCTTTTATGGGCGGCCAATGGCAAAACGATACGCCGACATTGCGTATTCCCTACTATCGTCCGCTTGATCCG…	ATG	TGA
SL1344_1423	ATGAGATTCAAAAAACACCTGTTGGGATGGCTTGCCGCAACGCTGTTGTTCAGTAGCCAGACGCAGGCCGCGCCGCTGGTTCTCGCCACCAAAAGCTTTACCGAACAGCATATTCTTTCCGCTATGACCGTTCAGTATTTGCAGAAGAAAGGCTTTCAGGTTCAGCCGCAAACCAATATCGCCGCGGTGATTTCACGTAATGCGATGGTGAATAAACAAATTGATATTACCTGGGAATACACCGGTACATCGCTGATTATTTTCAACCGTATCGATAAGCGCATGAGTCCACAGGAAACCTACGACACGGTAAAACGCCTGGATGCGAAGCTGGGCCTGGTATGGCTCAAACCGGCTGACATGAACAATACTTACGCGTTCGCGATGCAGCGCAAACGC…	ATG	TAA
htrA	ATGAAAAAAACCACATTAGCAATGAGTGCACTGGCTCTGAGTTTAGGTTTGGCATTGTCGCCTCTGTCTGCCACGGCGGCTGAAACGTCCTCTTCAGCAATGACTGCCCAGCAGATGCCAAGCCTGGCACCGATGCTCGAAAAAGTGATGCCATCGGTGGTCAGTATTAATGTTGAAGGTAGCACCACGGTGAATACGCCGCGTATGCCGCGTAATTTCCAGCAGTTCTTTGGCGATGACTCCCCGTTCTGCCAGGACGGTTCTCCGTTCCAGAATTCTCCGTTCTGCCAGGGCGGCGGTAACGGCGGCAACGGCGGTCAACAACAGAAATTCATGGCGCTGGGCTCCGGCGTAATTATTGACGCCGCGAAGGGCTACGTCGTCACCAACAACCACGTG…	ATG	TAA
SL1344_2586	GTGGCTAACCTGCAACTTGCCGTCAAAGGTGAATACTTCGATGCCATGATTCGCGGAGAGAAAACGGAAGAGTATCGCCTGTGTAATGACTACTGGAATAAGCGAATTATGTTCAGGGAGTATGACCGCCTGATTATCACAAAGGGATATCCGAAGCGCGACGATTCCAGCCGTAGAATTGACGTCCCGTATGGTGGCTATGAAGTGAAAACAATAACGCATCCGCACTTTGGTGATGAACCGGTAAAGGTGTACGCGATAAAGGTGAATATCAATTGCTAA	GTG	TAA
SL1344_1188	ATGAAATTAGCGCTCGTCAATCGGCAGGTCATTTTACCGGAAAGCGGAACCGAGTCCTTCCAGTGCCATGCCTCTACGCTTGTTCGCTTACCGTGCGGTACGCTCGTGGCCGCATGGTTCGCGGGGTTGCGCGAAGGAAGCGAAGATACAGCCATCTGGCTATCTCGCTATGAACATAATATCTGGACAACACCGCAGCGAGTGGCGGCACGCGAGGGGGAAGCGCACTGGAATCCGGTGTTATTTTACCCGTCGGATAAATTGTGGTTATTTTATAAAGTAGGCAGCGACGTACACGTGTGGAAAACCTGGTTTATCACCTCCAGCGATCGAGGATTTACCTGGAGTACGCCAGCTCCGTTGGTTAACGATGATATTTTGCCGCGCGGTCCCGTAAAA…	ATG	TAA
SL1344_3656	ATGAATAGAATATTTAAAGTCCTCTGGAATGCCGCTACGGGAACATTTGTTGTCACCAGCGAAACCGCAAAAAGCCGCGGCAAAAAAAACGGCCGCAGAAAGCTGGCAGTTTCCGCACTCATCGGTCTTAGCAGCATTATGGTTTCTGCGGATGCACTGGCCAACGCAGGAAACGATACAGGCGACGGCGTTACTCCAACGGGTACCCAGACTGGAGGAAAAGGGTGGATTGCAATTGGTACCGATGCCACAGCCAATACTTACACCAACGTTGATGGCGCAAGCGCCGCAATGGGTTATAAAGCCTCCGCGATGGGGAAATGGAGTACCGCCATTGGTTCCTACAGCCAGTCCACCGGCGACTCTTCGTTAGCGCTTGGCGTAAAATCGGTTTCAGCC…	ATG	TAA
sdiA	ATGCAGGAAAATGATTTCTTCACCTGGCGACGCGCAATGTTGTTACGCTTTCAGGAGATGGCGGCAGCAGAGGATGTTTATACTGAATTGCAATATCAGACACAGCGGCTGGAATTTGATTATTATGCCCTGTGTGTTCGTCATCCCGTCCCCTTTACCCGGCCTAAAATATCGCTTCGTACCACTTATCCTCCGGCGTGGGTAACGCATTACCAGTCCGAAAACTATTTCGCGATCGATCCGGTATTAAAGCCGGAAAATTTCAGGCAGGGTCATTTACATTGGGATGACGTGCTATTTCATGAAGCGAAGGCGATGTGGGATGCCGCCCAGCGTTTCGGATTACGCAGAGGCGTAACCCAGTGTGTGATGTTGCCGAACCGGGCGCTGGGCTTTTTA…	ATG	TGA
SL1344_2468	GTGAGTCAGGCCAACAGTATGCGAAAACGACATCGATTTAACACTCGCATGACCCGTATCGTACTGCTTATCAGTTTTCTCTTCTTCTTTGGACGTTTCGTCTACTCTTCTATCGGCGCCTGGCAGCACCATCAGGATAAAAAAGAAGCGCAACAGTCATCGCTTTCTGTCACCACGCCGGGACAACGTTAA	GTG	TAA
SL1344_3211	ATGGAATCGGCAAGTAATACCAGCGTAATCCTCGACGCATCAGCCCCGGCGCGTCGGGCAGGGATGACTGAAAGCGAATGGCGTGAAGCCATCAAATTTGATAGTACCGACACCGGTTGGGTCATTATGAGTATCGGGATGGCGATTGGCGCAGGGATCGTTTTTCTTCCTGTCCAGGTTGGCCTGATGGGACTTTGGGTCTTTTTACTCTCTTCTATTATTGGCTATCCGGCCATGTACCTGTTCCAGCGGCTGTTTATTAATACGCTGGCGGAATCCCCGGAATGTAAAGACTACCCCAGCGTGATCAGCGGCTATCTGGGCAAAAACTGGGGTATTTTATTAGGCGCGCTGTACTTTGTGATGCTCGTCATCTGGATGTTCGTCTATTCTACGGCG…	ATG	TGA
creC	TTGGCGAAGGCATTCGCCCAACTGCAACATCGCCCGTTTCGCGCCAATATCAGCGGGATCGTCAAAGTGCGCAATGAATACCATGTCTACATGACGGATGCGCAGGGGAAGGTGTTGTTTGATTCGGAAAACAAAGCGGTGGGGCAGGATTATTCTCGCTGGAATGACGTCTGGCTTACGCTGCGCGGACAGTATGGCGCCCGCAGCACGGCAAAAGATGCTGCCGATCCCAATAGCACCGTGATGTACGTAGCCGCGCCGATAATCAGCGATGGACGGATTATCGGCGTCCTGACTGTCGGCAAACCGAATGCGGCAATGGCGCCGGTGATTAAGCGCAGCGAACGGCGCATTCTGTGGGCCAGCGCCGTTTTACTGGGAATTGCGCTGGCGATTGGC…	TTG	TAA
hpaC	ATGCAAGTAGATGAACAACGTCTGCGTTTTCGCGATGCGATGGCAAGTCTGGCGGCAGCGGTCAACATCGTAACCACGGCGGGTCACGCCGGACGCTGCGGTATCACCGCAACAGCGGTCTGTTCCGTCACCGATACGCCGCCCTCCGTAATGGTATGTATTAATGCCAATAGCGCCATGAACCCCGTTTTTCAGGGTAACGGCAGGCTGTGCATTAATGTACTTAACCATGAGCAGGAGCTGATGGCGCGCCACTTTGCCGGTATGACGGGGATGGCGATGGAAGAGCGTTTTCACCAGCCATGTTGGCAAAACGGGCCGCTGGGCCAGCCGGTACTTAACGGCGCGCTGGCCGGTCTTGAAGGCGAGATCAGCGAGGTACAAACCATTGGCACGCAT…	ATG	TAA
eco	ATGAAGATGTTTGTCCCTGCCGTCGTCTTCGCCGCCCTCGCCAGCGCCTCTGCCTGGGCTAACAATGGCGATACCGCCCAGCCGCTGGAAAAAATCGCCCCCTATCCGCAGGCGGAAAAAGGAATGAAGCGGCAAGTGATAACCCTTACCCCTCAGCAGGATGAATCTACCCTCAAAGTGGAACTGTTGATTGGCCAAACGCTGAATGTGGATTGTAACCAGCATCGCCTCGGCGGCACGCTGGAAACAAAAACGCTGGAAGGCTGGGGCTATGACTATTATGTCTTTGATAACGTCACCTCTCCGGTATCAACCATGATGGCCTGCCCTGAAGGTAAGAAAGAGCAAAAATTCGTCACCGCCTGGCTGGGTGAAGACGGGATGCTGCGCTACAACAGC…	ATG	TGA
SL1344_3958	ATGAATAACAATGATATTTATCGTCAGTATATGTACAGTTATCCGCATAAGACGGCTTATCGGGAGCTGGAGAACGTCAGCTTTAGCGAAGTAAAACCGCGCATTTACGAGCACGACACACATCTGTATGTTCATATGCCCTTTTGTCAAAGTCGCTGCGGGTTCTGTAATTTATTTACCTGCACTGGCGCAGATAATACGTTCATTGATAGCTATATCGACGCGATTATTACCCAGGGCCGACAAATGGCGCTGGCGCCCGCCCACTGGGCAAGCTTTACCGTAGGCGGCGGCACACCTCTGCTATTAAATATTGCGCAATTAGAGAAGTTATTTTTTTCCGTCTTTGATGTGCTCAATGTTGACTGGAATATTTATAAAACGATTGAAACTTCCCCT…	ATG	TGA
recC	ATGTTAAGGGTCTACCACTCCAATCGTCTGGATGTGCTGGAAGCGTTGATGGAGTTCATCGTCGAACGCGAGCGGCTGGATGATCCCTTTGAACCAGAAATGATTCTGGTACAAAGCACGGGTATGGCGCAGTGGCTGCAGATGACCCTTTCACAAAAGTTTGGTATTGCGGCGAATATCGCTTTTCCGTTACCGGCGAGTTTTATCTGGGAGATGTTTGTCCGCGTGTTGCCGGATATTCCCAAAGAAAGCGCTTTCAGCAAACAAAGCATGAGCTGGAAACTGATGACCTTGCTGCCGCAGTTGCTGGATAAGGATGAGTTTGTACTGCTGCGCCATTATCTGACCGACGACACCGATAAACGCAAACTCTTTCAGCTTTCCGCGCGCGCCGCCGAC…	ATG	TGA
SL1344_4329	ATGCCCGGGCGCTTTGAATTAAAACCAACCCTGGCGAAAATCTGGCACGCGCCGGATAATTTTCGCATCATGGAACCGCTGCCGCCTATGCATCGTCGTGGCATTATCATTGCCGCTATCGTGCTGGTGATCGGTTTCCTGCTGCCCGCCAGCGAGACCAGCGACTCACCTGTCGTCACGCGGGAAGCGCAATTGGATCTGCAATCGCAATCACAGCCGCCGACGGAGGCCCAGCTTCAGGCGCAGCTGGTCGCGCCGCAAAACGATCCGGATCAGGTGGCGCCCGTTGCGCCGGAACCTATCCAGGAAGGCCAGCCGGAAGAACAAAACCAGCCGCAGACGCAGCCTTTCCAGCAGGATAGCGGCATCGGTCAACAGTGGCGCTCGTACCGGGTAGAG…	ATG	TAA
SL1344_0082	ATGAAACCAATACCTTTTTATTTGCTCGCGCTATTTTCTGCCGCCTCCGGGGCTACGGAGATAAACGTCTGCAAAGACCTGATCGGAACATGGAAAACCACGGCAGATAACCCGCCTTATACCATGACAATATCGCCGCCAGTAGAAAGCTGCGGGGAAAAATGTGTGAAACTGAACGTGCAGTATGAACTTGACGTGACTCACCGCAACGCGCTTTATTGCCATGAAGGACAAGAGGGGGTAAAAGGGCAGGGACCCATGGTGATAGCATTTGAAGGGGCGTATGGTGGACACGCTATTGGAACCTATAACCGACAGCTGCAATTACTTTGGGCTGGCGTAATATCGAAAAATAAAAAGGGGAAATGGATAACGAAAATGGAAAATTACTGGTTCAGG…	ATG	TAA
phrB	ATGCCCACCCATTTAGTCTGGTTCAGGCGCGATCTGCGTTTACAGGATAACCTTGCGCTGGCCGCCGCCTGCCGCGATGCATCCGCGCGGGTGCTGGCGCTTTATATTTCCACCCCCGCGCAGTGGCAGGCCCATGATATGGCGCCGCGGCAGGCGGCATTCATCAGCGCGCAGCTCAATGCGCTACAGACGGCCCTTGCAGAGAAAGGCATTCCGTTGCTGTTTCATGAAGTGGCGGATTTTAACGCCAGTATTGAAACGGTCAAAAACGTTTGCCGACAGCATGACGTCAGCCATCTGTTTTATAACTATCAGTATGAGTTTAACGAGCGTCAGCGTGATGCGGCGGTGGAAAAAACGCTGCCCTCTGTCATCTGCGAAGGCTTTGACGATAGCGTG…	ATG	TGA
SL1344_1662	ATGTTTCGACACGTAAAACAACTTCAATATACTGTGCGAGTGAGCGAACCTAATCCTGGATTAGCGAACCTGCTGCTGGAACAGTTTGGCGGCCCGCAGGGCGAACTGGCGGCCGCCTGCCGCTACTTCACGCAAGGTTTAAGCGATGATGATGCCGGTCGTAGAGAAATGTTAATGGACATCGCCACCGAGGAGCTGAGTCATCTGGAAATTATCGGCTCACTGGTAGGAATGCTTAATAAAGGCGCTAAAGGCGAGCTGGCGGAAGGTACCGAAAACGAAGCGGAACTTTATCGCTCGCTGACGCAGAATGGTAATGATAGCCATATCACCTCTCTGCTGTATGGCGGCGGCCCGGCGTTGACAAACTCCGGCGGCGTACCGTGGACCGCGGCTTAT…	ATG	TGA
SL1344_0449	ATGAAACGCGCCGTTGTTGTATTTAGTGGAGGTCAGGACTCCACCACTTGTCTGGCGCAAGCGCGGCATCAGTATGATGAAGTGCATTGTGTCACGTTTGATTATGGTCAGCGCCACCGCGCAGAGATTGATGTCGCGCGGGCGCTGGCGTTAAAACTTGGCGCACGCGCGCATAAAGTGCTGGATGTCACTTTGCTGAACGAACTGGCGGTCAGCAGCCTGACGCGGGATAGCATTCCGGTGCCGGACTATGAACCGAACGCTGACGGTATCCCCAATACTTTCGTACCGGGACGCAATATTCTCTTTCTGACGCTGGCGGCGATTTACGCTTATCAGGTTAAAGCCGAAGCGGTGATCACTGGCGTTTGCGAGACCGATTTTTCCGGCTATCCAGAC…	ATG	TGA
SL1344_1422	ATGGATACGATACATTATATGCTGGATAACGCAGGCTATCTCGCCAGCCTTACCTTTCAGCATCTCTGGCTGGTCGCGCTGGCCGTCGGTCTGGCGATTATCATCGGCGTACCGTTAGGCGTTTTGATTGTACGCCACAAATGGCTGGCAACGCCGGTATTGGGCGCCGCCACGCTACTTCTTACCATTCCGTCTATCGCGCTGTTTGGATTAATGATCCCGCTCTTTTCGCTGATCGGACATGGTATTGGCGTTCTGCCCGCCGTGACGGCCGTTTTTCTCTACTCTTTACTGCCGATTGTCCGTAATACCCATACTGCGCTTGATAGTTTGCCGCCCGGTCTGCGTGAAGCGGGACGCGGCATCGGTATGACTTTCTGGCAACGGCTGCGCTGGGTC…	ATG	TAA
SL1344_2585	TTGAAAATGTTCATGCAAATAGACAGACGCATAGATGTTAATGGTAATTCATACTTAGTTAGATGCGAAGAGAGGCCTAACGGTGAGTGGCGTGTATATGATATTGACCGTAAGGTCAATATCAGCACCATGAACAAAGACACTGCCTTTGATGAATGGAAAGCTGAAGCTAAAAAACAACATAATTCGTAG	TTG	TAG
cbiH	ATGTTGAGCGTAATTGGTATTGGCCCCGGTTCGCAGGCAATGATGACGATGGAGGCGATTGAGGCGCTTCAGGCGGCGGAAATCGTCGTCGGTTATAAAACCTACACCCACCTGGTGAAAGCCTTTACCGGCGATAAGCAGGTGATCAAAACCGGGATGTGCAGAGAGATTGAACGCTGCCAGGCGGCGATTGAGCTGGCGCAGGCCGGGCATAACGTGGCGCTGATTAGCAGCGGCGACGCCGGTATTTACGGCATGGCGGGACTGGTGCTGGAGCTGGTGAGCAAGCAGAAGCTGGATGTAGAGGTTCGCCTTATTCCGGGGATGACCGCCAGTATCGCAGCCGCCTCGCTGCTGGGTGCGCCGCTGATGCACGACTTCTGTCATATCAGCCTCAGC…	ATG	TGA
SL1344_4470	ATGTCACCAACCATGCTGACCTATATTAACGAAGAGTCTGACGTCCTGGCGAATATTATTCGCCGCCATCGCCAGTCTCTGGAAGAAGTATCGCGGTTCGCCAGCCAAAAAACGTTACGACGAATCCTGATATTAGCCACCGGATCGTCATTGAATGCCGCCTTTTGCGCCCGTTATTTCTTTGAGCGCTGCGGTATCTCTATCGATATTAAAGAGCCGTACACCTTTAGCCAGTATGAGAATAGCGATCCGCAAGCCGATATGGTTATTGCTATTTCCCAGAGCGGGAAAAGCGCTTCTACCCTGGAGGCGATGCGTAAAGTTCAGGCGCAGGGACGTCCGGTATTCGCTCTGACCGCCGATCCGCAAAGCCCTCTTGGCAAGGCCAGTGATTATCCA…	ATG	TGA
SL1344_2467	TTGCGCTTCTTTTTTATCCTGATGGTGCTGCCAGGCGCCGATAGAAGAGTAGACGAAACGTCCAAAGAAGAAGAGAAAACTGATAAGCAGTACGATACGGGTCATGCGAGTGTTAAATCGATGTCGTTTTCGCATACTGTTGGCCTGACTCACAAAGGGTTCCTTAACGTTGGCCCAGCGATATGGGCGGGATCAGGCTGGGTTCTTCAAGGGTATTATCAAGGCGAAGAACGTAACAAGCCTGCGTTCACTCTACATTAA	TTG	TAA
SL1344_2737	ATGAACAAAATCAGAGCCGCCGTGGTGGGTGCAGGTATCTACGGCAAACACCATATGAACGCGTACCGCCATAACCCGGACACCGTGCTGGTTGCCATCTGCGACACCGATACAGAACGTTGTGACGACCTTGCCATGGCGTACGGGATCCAGGGCTACACACGACTGGATCGGTTACTACAGCAGGAGGCTATTGATATCGTCTCGGTGGCGACACCGGATCCGTACCATACCGAATCCATCCTCACCGCCCTGCGCCACGGTCAGCATGTACTGGCGGAAAAACCGCTCGCCACCTCAGTACGCGAGTGTGAGCTTATCGTGGAGATGGCGCAGCAGCGGGACCTGCTGGTCGGCGTCGATTTCCACAAACGCTGGGACCCGGCAGTAATGCGCATT…	ATG	TAA
SL1344_3210	ATGTTTGAATCTAAAATAAATCCATTGTGGCAAAGTTTTATTCTGGCCGTACAGGAAGAAGTAAAACCGGCGCTGGGGTGTACTGAGCCAATTTCACTGGCGCTGGCGGCAGCGGCGGCGGCGGCTGAACTTAACGGCACAGTTGAACGCATTGACGCGTGGGTTTCGCCCAATCTGATGAAAAATGGTATGGGCGTTACCGTTCCAGGAACGGGAATGGTAGGGCTACCGATCGCCGCGGCGTTGGGCGCGTTGGGCGGTGATGCGAAAGCCGGGTTGGAGGTGTTAAAAGACGCTTCCGCTAAAGCCGTTGCCGATGCAAAAGCGATGCTGGCCGCTGGACATGTCGCGGTGATGTTGCAGGAGCCATGTAACGATATTCTGTTTTCACGGGCGAAA…	ATG	TAA
SL1344_1036	ATGAAACGATATATACTGGCTACCGTGATAGCATCTCTTGTTGCAGCCCCGGCAATGGCGCTGGCCGCTGGCAACAATATTCTCAGCGTACATATTCTCGATCAGCAAACAGGTAAACCGGCGCCCGGCGTGGAGGTGGTACTGGAGCAGAAAAAGGATAACGGATGGACGCAATTAAACACCGGGCATACCGACCAGGATGGACGTATTAAAGCACTGTGGCCCGAAAAAGCTGCCGCGCCGGGGGATTATCGCGTTATTTTTAAAACCGGCCAGTATTTTGAAAGTAAAAAACTGGATACGTTTTTCCCGGAGATTCCCGTCGAGTTTCATATCAGCAAAACGAATGAACACTATCATGTGCCGCTGTTATTAAGTCAGTATGGTTATTCAACCTAT…	ATG	TAA
napF	ATGGTTGATTTATCCCGTCGAAGCATGTTGACCGGCAGTTGGCGCAACGCCAGCAATGGGATTCTTCCGCCGTGGGCCAGAGAAACGACCTATTTTCTCGCACATTGTCTGCGTTGCGACGCCTGCATCCAGGCGTGTGAGGCCGACATCCTGCAGCGAGGGGCGGGGGGATATCCGAGCGTAGATTTCAAACGGGGCGAGTGCAGCTTTTGTTATGCCTGTGCGCAGGCCTGTACCGAATCGCTTTTTCTTCCGCGCCACACCAGGGCCTGGGATCTGGTTTTTACGCTCACGGAAAACTGCCTCGCCAGGCAATCGGTTGAATGCCATCGTTGCCAGGACAGTTGTGAACCTATGGCCATTACCTTTCGTCCCACGTTATCCGGTATTTACCAGCCG…	ATG	TAA
SL1344_3957	ATGAGCGCCCCCGCCCTGCGCGATATTCACACGCTGTTTTATCGCGGCTATCTTAAATCGTGTAATTATCATTGCGGCTATTGCCCGTTCCATAAACACGCCCGTAACGATAAAAAACGCGACGAAGCCGCGCTATGGCGCATGGTTGACCATTTGCCTCTTTTAGGTACGCCGTTGAATGTGATGATTACGCCTTATGGCGAGGCGCTACGCTTGCGTTATTACATGGCGGCGCTGGCAGAAATTAGCCGCTATCCTCATGTTCAGGCGGTCGGCATACAAACTAACGCCTCTTTTTCGTTAATGTCATTGCTGGAATCATTTCGTGCTGGCGGCGGAGATATCTCAAAGCTTCGGTTATGGTGTTCTTTTCATCCCTCACAAATTACCGCTGAGCGC…	ATG	TAA
ptr	ATGCCCCGCAGCACCTGGTTCAAAGCGTTATTGTTATTGGTCGCCCTCTGGGGGCCTGCAGTTCAGGCGGATATCGGTTGGCAACCGCTGCAAGAAACTATCCGTAAAAGCGATAAAGATACCCGGCAGTATCAGGCGATACGTCTTGATAATGACATGGTGGTGTTGCTCGTATCCGATCCGCAGGCTGTAAAGTCGCTTTCAGCGTTAGTGGTGCCCGTTGGATCGCTTGAAGATCCTGAGGCTCATCAGGGGCTTGCTCATTATCTTGAGCATATGTGCCTGATGGGGTCAAAAAAATATCCGCAGGCGGATAGCCTTGCCGAATACCTTAAAAGACATGGCGGTAGCCACAACGCCAGCACCGCGCCTTATCGAACAGCCTTCTACCTGGAGGTT…	ATG	TGA
SL1344_4328	ATGGATACCCAACGCCAGGCCTCCCCGTTTGCCCGCAAAAACGTCGTTTATGTGTGTGCCGCATTTTGTTGCTTGCTATGGGGCAGCGCTTATCCAGCCATCAAAAGCGGTTATGACCTCTTTCAGATAGCCACCGATGATATCCCTTCTAAAATTGTTTTTGCTGGTTATCGTTTTTTGTTTGCGGGTGGGTTGCTACTACTGTTCGCGCTGCTTCAGCGTAAACCGATTGGTCGGTTTCGTCCGCGCCAGTTTGCTCAGTTGACGTTACTGGGGCTGACTCAGACGTCGCTGCAATATCTCTTTTTCTATATCGGCCTTGCGTTCACCTCCGGCGTGAAAGGCTCAATCATGAACGCGACAGGCACATTCTTCAGCGTATTGCTGGCGCACTTTATT…	ATG	TAA
ybfA	ATGGAACACTATAAAGACTATCCAGCGCATGTCATTTTTGTCCGTCGTGCTTTCGCGGTGATCGCAGGCGTGCTGGCGCTGCCGGTGATGCTCTTCTGGAAAGACCGCGCGCGTTTTTATAGTTATCTGCACCGTGTCTGGTCGAAAACCAGTGATAAACCGGTATGGATGGCGCAGGCTGAAAAAGCCACCTGCGACTTTTATTAA	ATG	TAA
SL1344_4154	ATGCGAAAAATTATTGTTCCCCGACTTTCCGGCTGGCTGGTTGCCTCTGTCGTACTGTTTGCGCTTATCGGCTGGACATCATCAGCGCAAATTCCGGTCGTCATCTATAAACTCAGCCTGGTTTCGTTATCAGCGGTGCTGGGTTACTGGCTCGACCGTAGTCTTTTCCCCTGGGCACGTCCCGACTCCTTTTGCCCCTGGGAAGAATCGCTGTGCTGCGCCGCGGCGATGATTCGTCGCGCGATCATCGTTGCGGCAATTTGCCTTGCCGTCGCGCTGGGGCTGTAA	ATG	TAA
SL1344_1661	ATGAATTATACTGAACATTATCATGACTGGCTTCGTGACGCCCATGCCATGGAAAAACAGGCAGAATCGATGCTTGAATCTATGGCCAGCCGTATTGAAAATTATCCTGATATAAAAGCCAGAATTGAACAACATATTAGTGAAACCAAACATCAAATTACCATGCTCGAAGAAGTGTTGGACCGTAATGGCATTTCCCGTTCGGTGTTGAAAGACTCCATGAGTAAAATGGCAGCAATGGGGCAATCTATCGGTGGCATGTTCCCTTCCGATGAAATTGTCAAAGGTTCAATTAGCGGTTATGTTTTCGAGCAGTTCGAAATTGCTTGTTATACCTCCCTGCTGGCGGCGGCAAAAAAAGCTGGCGACACTGCCTCAATTCCGACGATTGAAGCCATT…	ATG	TAA
SL1344_0448	ATGCAAACACAAATCAAAGTTCGTGGATATCATCTTGATGTTTATCAACATGTTAATAATGCCCGCTATCTGGAGTTTCTGGAAGAAGCCCGTTGGGATGGTCTGGAAAACAGCGACAGCTTTCAGTGGATGACGGCCCGCAATATTGCCTTTGTGGTGGTAAACATCAATATAAATTACCGTCGCCCGGCGGTATTGAGCGATCTATTGACCGTGACCAGCCAGGTACAACAGCTTAACGGTAAAAGCGGCGTATTAAGCCAGACGATTACGCTGGAGCCAGAAGGGCAGGTGGTGGCCGATGCGCTCATCACGTTTGTTTGTATTGATTTAAAAACGCAAAAAGCGCTGCCGCTGGAAGGCGAATTGCGTGAAAAGCTGGAACAGATGGTGCAATAA	ATG	TAA
SL1344_3553	GTGGAAAGGTTTGATGCCGTTATTATAGGCGCTGGCGCAGCGGGCATGTTTTGCGCCGCGCAGGCAGGACAGGCGGGTAGCCGCGTGCTGCTCATCGATAATGGCAAGAAGCCAGGACGTAAAATCCTCATGTCCGGCGGTGGGCGCTGCAACTTTACTAATCTTTATGTTGAGCCTGCTGCGTATTTGAGCCAGAACCCCCATTTTTGTAAATCAGCGTTAGCCCGCTATACCCAGTGGGATTTTATCGATCTGGTCGACAGGTATGGGATAGCCTGGCATGAGAAAACGCTGGGACAGCTTTTTTGCGATGATTCCGCCCAACGCATTGTCGATATGCTGGTTGCCGAGTGCGACAAAGGCGGCGTAACGATGCGCCTGCGTAGCGAGGTATTGAGC…	GTG	TAA
SL1344_1421	ATGATAAAACTGGAAAATCTCACCAAACAATTTGTACAGAAAAAGGGTCAGCCGCTAAAAGCCGTCGACAACGTCAACCTGAACGTGCCGGAAGGCGAAATGTGCGTCTTACTCGGTCCCTCCGGCTGCGGCAAAACCACCACGTTAAAGATGATCAACCGGCTGATCGCGCCCAGCAGCGGTAATATTCTTATCAACGGCGAGAATACCAACGATATGGATGCGGTAACGCTACGCCGCAATATTGGGTATGTTATCCAACAAATCGGCCTGTTTCCTAATATGACGATTGAAGAAAATATTACCGTTGTGCCGCGCATGTTGGGTTGGGACAAAGCACGCTGCAAGCAACGCGCCGAAGAGTTGATGGACATGGTGGCGCTGGATGCCAGAAAATTT…	ATG	TAA
dgt	ATGGCATCGATCGATTTCCGAAATAAAATTAACTGGCATCGTCGTTATCGTTCACCGCAGGGTGTAAAGACGGAGCATGAGATCCTGCGGATTTTTGAAAGCGATCGCGGGCGGATTATCAACTCTCCGGCTATACGCCGTTTGCAGCAAAAAACGCAGGTTTTCCCGCTGGAGCGCAATGCCGCGGTGCGTACTCGCCTGACGCATTCGATGGAGGTGCAGCAGGTAGGGCGTTATATCGCGAAAGAGATTTTAAGCCGTCTGAAAGAGCAAGACCGACTGGAGGAGTACGGCCTGGACGCGCTGACCGGTCCCTTTGAAAGTATTGTGGAAATGGCCTGCCTGATGCACGACATCGGTAATCCGCCGTTCGGTCATTTTGGCGAGGCGGCGATCAAT…	ATG	TAA
SL1344_2584	ATGAGAATTGAACTTGTTATCAGCCGGACAAAACAGCTTCCGGAAGGTGCCGTTCCTGCACTTGAAAAAGAATTAATTACCCGTCTCCAGAATCAGTATGAAAACTGCAACTTAACCATCCGTCGAGGCAGTCAGGATGGTCTGAGTATCGTCGGTGCTGCTGATGGCGATAAAAAACGTATACAGAGCATTCTGCAGGAAACGTGGGAAAGCGCTGACGACTGGTTTTATTAA	ATG	TAA
SL1344_1187	ATGGCACTCAGAACCTTGTCAGCACTTCCCGTGTTTGCTGATTCTCTTTTCTCTGACCGTTTCAACCGTATTGATAGACTTTTCAGTCAATTAACAGGAGATACGCCAGTCGCTGCGACGCCAGCTTACGATCTGCAAAAGCGCGATGCGAATAACTATCTGCTTACCGTGAGCGTTCCTGGCTGGAAAGAGGAAGAGCTTGAAATTGAAACGGTTGGCGGCAACCTGAATATTACGGGTAAACACACTGAAGAGACGGTAGAGGATCAGACGCACTGGATTTATCGTGGTATTCGTAAGGCGGATTTCCAGTTGAGTTTTTCTTTGCCTGAACATGCTAAGGTGAATAATGCGAAACTGGAACAGGGCCTCTTGTTGGTCGAGATTTACCAGGAGATC…	ATG	TAA
rtcR	ATGCGAAAAACGGTGGCCTTTGGTTTTGTCGGTACGGTACTCGACTATGCAGGACGCGGCAGTCAACGTTGGGAAAAATGGCGCCCTACTTTGTGTCTGTGCCAGCAGGAGACGCTGGTCGTTCACCGCCTGGAACTGCTGTACGATGCCCGCTCTCGCTCGCTGTTTGAAGGATTAAAGAAGGATATCGCCAGCGTCTCGCCGGAAACGGAAGTCGTCGGCGTAGAAATCGCGATCCGCAACCCGTGGGACTTCGAAGAGGTTTACGCCTGCCTGCACGATTTCGCCCGCAGCCATACCTTTCATCCCGAAGATGAAGACTATCTGATTCACATCACCACCGGCACCCACGTCGCGCAGATCTGCTGGTTCCTGCTGGCGGAGGCGCGCTATCTTCCG…	ATG	TAA
SL1344_2466	ATGAAACTAAATAAAACTTATATAAATATCAGAGATAAATGGTGGGGACTACCGCTCATTCTCCCTTCGATTTTACTGCCTGTTTTAAGTAGCGCAAATACTTATGCGCTTACCAGCACTGGAAATGTGGTTCTTTTTTACCTGCCGTTAGCTTTTATGCTTAGCCTGATGCTCTTTTTCGGCTGGGCAGCACTGCCGGGCATTGTGCTTGCTATCTTCTGGCGCAGATACCCGCAGACAGGGCTGTATGAAACCCTTTCCGTGACGATGCACTTTATCATTACTATCGTGCTAAGCTGGGGCGGCTATCGTGTCTTTTCCCCCCGGCGAAACAATGTTTCCCACGGCGACGCCCACCTGCTGTTTCAACGAATATTCTGGCAGGTATTTTGTTCAGCA…	ATG	TAA
SL1344_3209	GTGGTAAAACCTGCCGTACAGGAGGCGATGAGCGCCGCTGTGCCGCTGGGCTATGAAGAGATGCTAACCGAACTGGAAGCCATCGTGGCGGACGCCGAAGCCCGGCTGGCAGAAGAAGAGGCCGCAGCCTGA	GTG	TGA
creB	ATGCAGCAACCGCAGGTCTGGTTAGTCGAGGATGAACAGGGAATCGCCGATACGCTCATCTACACCCTGCAACTGGAAGGGTTTACCGTTGAGCTATTCGCTCGCGGGCTGCCCGCGCTGGAAAAAGCGCGTCAGCAACGGCCGGATGCGGTGATTCTCGATGTGGGACTACCGGATATCAGCGGCTTTGAGCTGTGTCGGCAGTTGCTGGAACGCCATCCTGCGCTGCCGATTCTTTTCCTGACTGCCCGTAGCGATGAAGTGGATCGATTGCTTGGTCTGGAGATTGGCGCAGATGATTATGTCGCCAAGCCGTTCTCGCCGCGCGAAGTGAGCGCCCGCGTGCGCACGCTGCTGCGCCGGGTGAAAAAGTTTGCTGCGCCGTCGCCGGTGGTGCGT…	ATG	TGA
copR	ATGACAATTATGTCATCTTGTTGGAGATTTACGGATTCGCTAACAAGCCTATGGCATACTGCGTTGATGAAGATTTTATTGATTGAAGATAACCAGAAAACCATTGAGTGGGTACGTCAGGGACTCACGGAAGCAGGCTATGTGGTTGATTATGCCTGTGATGGACGAGACGGATTACACCTGGCCCTTCAGGAACATTATTCATTGATTATTCTTGATATTATGCTGCCGGGGCTTGATGGATGGCAGGTTTTACGCGCGTTACGCACTGCGCATCAGTCCCCTGTTATTTGCCTGACGGCGCGCGACTCGGTTGAGGATCGCGTCAAAGGTCTTGAGGCGGGCGCTAATGATTACCTTGTTAAGCCTTTTTCCTTCGCCGAACTGCTGGCCCGGGTG…	ATG	TAA
rplD	ATGGAATTAGTATTGAAAGACGCGCAGAGCGCGCTGACTGTTTCCGAAACTACCTTCGGTCGTGATTTCAACGAAGCGCTGGTTCACCAGGTTGTTGTTGCTTATGCAGCTGGTGCTCGTCAGGGTACTCGTGCTCAGAAGACTCGTGCTGAAGTAACTGGTTCCGGTAAAAAACCGTGGCGCCAGAAAGGCACTGGCCGTGCGCGTTCAGGTTCTATCAAGAGCCCGATCTGGCGTTCCGGTGGCGTGACCTTCGCTGCTCGTCCGCAGGACCACAGTCAAAAAGTTAACAAGAAGATGTACCGCGGCGCGCTGAAAAGCATCCTGTCCGAACTGGTACGTCAGGATCGTCTGATCGTTGTCGAGAAGTTTTCTGTAGAAGCGCCGAAAACTAAGCTG…	ATG	TGA
yojF	ATGCGCACTAACTGGCAGGTCTGTAGCCTGGTCGTGCAGGCCAAAAGTCAGAACATCGCCGCCATTGGCACACAGTTGAACACGTTGCCGGGTTGCGAAGTCGCGTTAAGCGATGTTGAAAGCGGGCAACTGATCGTGGTGGCGGAAGCAGATCAGAGTGAAACGCTGATGCAAACAATTGAGTCAGTACGCAATGTCGAGGGCGTACTGGCGGTGTCGCTGGTTTATCACCAGCAGGATGAGCAAGGTGAGGAAACACCATGA	ATG	TGA
SL1344_3956	ATGCGATATCGTTTAATCGCTTTTGATCTTGATGGAACGCTGCTAAACCGTAATAAACAAATTCTGCCAGAGTCGCTAACCGCCATCCGTCAGATGCAGGACATGGGCTGCCGAATAATGCTTGTCACCGGCCGCTCTCATCGTGAAGCCTATGCGTATTATCAAACGCTGGCGCTCACCGAACCGATGATCTGTTGTAACGGAAGCTATATTTATCAACCGGCTCAACAGCAGATCCTTCACCCGCTGCCGCTGACGCACTTACAAACGGAAAAAATACTGGCGCGGGTATATCCGCTTAAACCGACAATTCGTGCTGATGATAAAATAATCTTTCAGGCTGATGAGCTAAGCAGTAGGGAGAATATCTGGCAAATCAGCATCGTTCATCGGCACATA…	ATG	TAA
recB	ATGAATGATGTCGCCGAGACTCTTGATCCTCTGCGCTTGCCCCTGACAGGCGAGCGTTTGATTGAAGCATCAGCGGGCACAGGCAAAACGTTTACTATCGCGGCGCTGTATCTGCGGCTACTGCTCGGTTTAGGCGGCAGCGCCGCATTTCCCCGTCCGTTGACCGTTGAAGAACTGCTGGTGGTAACCTTTACGGAGGCCGCCACTGAAGAGCTGCGTGGGCGAATCCGCAGTAATATCCATGAGTTGCGCATCGCCTGTCTGCGGGAAAGCACGGATAATCCGCTTTATGCCCGCTTGCTGGAAGAAATTAGCGACAAAAAGCAGGCCGCGCAGTGGTTATTACTGGCGGAACGACAAATGGACGAGGCCGCGGTCTTTACCATCCACGGTTTTTGC…	ATG	TGA
rplI	ATGCAAGTTATTCTGCTTGATAAAGTAGCAAACCTGGGTAGCCTGGGTGATCAGGTTAACGTTAAAGCGGGCTATGCTCGTAACTTCCTGGTACCAAAGGGTAAAGCTGTTCCGGCTACCAAGAAAAACGTTGAATACTTCGAAGCACGTCGCGCTGAACTGGAAGCTAAACTGGCTGACGTTCTGGCTGCTGCAAATGCACGCGCAGAGAAAATCAACGCCCTGGAAACCGTTACTATCGCGTCTAAAGCAGGCGACGAAGGTAAACTGTTCGGTTCCATCGGTACTCGCGACATCGCTGACGCTGTGACTGCGGCTGGCGTTGACGTGGCTAAGAGCGAAGTTCGTCTGCCGAACGGCGTTCTGCGTACCACTGGCGAACACGAAGTGAACTTCCAG…	ATG	TAA
kdpA	ATGGCCGCGCAAGGATTTTTACTGATCGCCAGTTTTTTACTGATTTTATTGGTACTGGCGAAACCATTGGGTTCGGGCCTGGCAAGGCTCATCGCCGCCGTTCCGTTGCCGGGCGTGGCTGGCATTGAGCGTATCCTCTGGCGGACTCTTGGCATTACCGACCACGAAATGAACTGGCGTCAGTATTTACTGGCGCTACTGACGCTCAATCTGCTGGGACTGGGCATCCTGTTTTGCCTGTTGTTCTGGCAGGAGTGGCTGCCCTTAAATCCGCAGCGGCTACCGGGGCTGTCCGGGGATCTGGCGCTGAATACCGCCGTCAGCTTTGTCACCAATACCAACTGGCAAGCCTACAGCGGCGAAAGCACGCTGAGCTACTTTAGCCAGATGGCCGGGCTG…	ATG	TGA
SL1344_1660	ATGAATATCAAAACCGTTGAAGACCTTTTTATCCATCTACTTTCAGATACCTATAGTGCAGAAAAACAATTAACCAAGGCTCTTCCTAAACTTGCCAGAGCCACGTCCAATGAAAAATTAAGCCAGGCCTTTCAATCTCATCTTGAAGAAACCCAGGGTCAGATTGAACGTATTGATCAGATCGTCGAATCTGAATCTGGCATTAAACTGAAAAGAATGAAATGCGTCGCTATGGAAGGGCTGATTGAAGAAGCCAATGAAGTCATCGAAAGTACGGAGAAAAACGAAGTACGCGATGCAGCGCTTATCGCCGCGGCGCAAAAAGTCGAGCATTACGAAATCGCCAGCTACGGCACGCTAGCCACCCTGGCCGAGCAGCTCGGCTATAGCAAAGCATTA…	ATG	TAA
ybaV	ATGAAACACGGAATTAAAGCACTGCTTATTACGCTTTCTTTAACCTGCGCGGGCATGGCCCATAGCGCGCTGGCGGCGACGCCTGTCGCAAAAAATGCAGCGGTGGAAACAAAAGCGGATACGCCTTCTTCATCCTCCGCCAAAGCGGCATTACCTGCTAAAGCCAGCGATGATGAAGGTACCAGGGTGAGCATTAATACCGCGTCTGCGGAGGATCTGGCGCGGGTGATGAACGGCGTTGGGCTGAAAAAAGCGCAGGCTATTGTGAGCTATCGGGAGGAGTATGGTCCTTTTAAAACGGTGGATGATTTAAAGCAGGTGCCGGGAATGGGAAGCGCGCTGGTGGAGCGTAATCTGGCAGTTTTAACATTGTAA	ATG	TAA
clcB	ATGCATCGTTTACACGCTTACCCGGATCTGCGCGCGATGTTTCGTCGCCTGCTGATCGCTACGCTCATCGGTATTCTCGCGGCGCTGGCTGTCGCCGCCTTCCGTCATGCGATGCAATTGCTGGAGTGGATTTTCCTGAGTAATGACACCGGCAGTCTGGTGAATGCGGCTGAGGGGCTTTCGCCCTGGCGACGGCTGATTACGCCGGCGCTTGGCGGCCTGGCCGCTGGTCTGTTGCTGTGGGGGTGGCAAAAAATGAACCAACAGCGCCCCCATGCGCCCACTGACTATATGGAAGCATTGCAAACCGACGGGCAATTTGACGTTGGCGCCAGTCTGGTGAAATCGCTGGCCTCGCTGCTGGTCGTGGTCAGCGGCAGCGCAATTGGTCGCGAAGGC…	ATG	TGA
SL1344_2583	TTGAGTAATTCAGCTTTGCAAAAATCAGAAGATAGCTGGTATGACATTGTAAGAAGATCTGATGGCTGCGTAGTGTTTAGCTTTCCATCATCAGGCAGGCATCTTATCTATCGTGTAAATGGCATGGTATCTATGCGTCCTTTGCTGGATGATGAAGAAGTTTTTACTCCCAACGGTTTTATGCATTTTATTCGCCGTCTCGGCTACCGGGTAACACCACCTTCTGATAATATGAAATCAACGGCCTGA	TTG	TGA
cbiJ	GTGAATGAGGGGGATGTGCTGGTGGTGGGCGGCACCAGCGATGCGCGCGCGTTATGCCGACAACTGGATGCGGCGAACGTCGCGTACACCTTATCCGTGGCGACGCCAGCCGGAAAAGCGCTGGCGGGCGACATTAAAGGGCAGGTGCGCTGTGGTCGTCTGGAGTACGGGCAGATGGTCGCCTGGCTAAAAGAAAACCGTACTCGCTGGGTAATAGATGCATCGCATCCTTATGCAGAAATGGTCAGCCATAACCTCCTTCGCGCCTGTGAAACGGCAGGCGTGTTGTTAAGTCGTTATCAGCGTCCGGAGCAGCTTAGCAATCTGACGCATCCGCTTCTCTATACGGCGCGCAGTATTGCCGATGCCTGCGAGATAGCGAGGCGTTTTGGTCCGCGC…	GTG	TAA
SL1344_4469	ATGATTTCTGATAAAGACCGCCAGCAGGCGGAAACCACTGGTCTGGTCACCGCGCGTGATTTACGCCGCGTCTTCTGGCGGTCATTCCAGATGGAGTTTTCCTGGAACTATGAACGACAAATGAACCTGGCGTTCGTCTATACGCTCATTCCGGTATTAAAGAAACTGTATAGCCGAAAAGAAGATCTTGCCGAAGCGCTAAAACGCCATCTGGCTTTCTTTAATACCACGCCGCACATTGTGACGTTGATCCTCGGTATTACCGTGGCGATGGAGGAGAAAAATAGCCAGCAGAAAGAGATGGACGCCAGTTCTATCGATAACGTCAAAGCGTCGTTAATGGGGCCGCTGGCGGGTATTGGCGACTCTTTTTTCTGGGGAACATTGCGTCTTATCGCC…	ATG	TAA
ppx	ATGCCAATTTACGATAAATCCCCTCGTCCGCAGGAGTTCGCTGCGGTCGATCTCGGCTCAAACAGCTTTCATATGGTCATTGCCCGCGTGGTTGACGGCGCAATGCAGATTATCGGGCGCTTAAAACAGCGCGTCCATCTGGCGGACGGGCTGGGCGCAGATAACAAACTCAGCGAAGAAGCCATGGAACGGGGGCTTAGCTGTCTGTCGCTGTTTGCTGAACGCTTACAAGGTTTCTCCCCTTCCAGCGTCTGTATCGTAGGCACCCATACGTTACGTCAGGCGCAAAATGCCGCTGATTTTCTCAAACGCGCGGAAAAGGTTATTCCCTACCCGATAGAGATTATTTCCGGTAACGAAGAAGCGCGCCTGATTTTTATGGGCGTAGAACATACGCAG…	ATG	TAA
SL1344_2736	ATGAACACGGTACTTATTCCTCCCGGTCCCGGCGGCTACGGTAAAGGGCTTTGGCTGCCCGTTGCCAGCGGCAAAAAGGTGCTGTCACTGACCGGGCGCGAGATTCATCCGGTGGCGATAGAAATCGGTGCGCTCACTGAATCGGAAGTGGTGAACGGCTTCTCCGATATCCCGCCTGATAACGACATCCTGTGCGTGGTGATTAACTGCGCCGGGTCCCTGCGCTGCGGCCTGTATCCGCAGAAGGGCATCCCGACCATCAATGTGCTGCCCACCTGGCGCGCGGGGCCGCTGGCGCAGTTTATTAGCGAGGATAACTACGTCTCCGGCGTGACGATAGAGCAACTGGTTCTGGTGGATACGGCCGAAGCGCCGGACGGTGAACCGGAGCCAGTGTCT…	ATG	TGA
SL1344_3208	ATGATTACGACCCGAACCGCCAAACAATGTGGACAGGCAGACTACGGATGGCTACAGGCCCGCTATACCTTCTCCTTTGGACACTATTTCGACCCTACACTGCTAGGCTACGCGTCGTTGCGCGTACTGAACCAGGAAGTGCTGGCGCCGGGCGCCTCTTTTCAGCCTCGAACTTACCCAAAGGTGGATATTTTAAACCTGATTCTGGACGGCGAAGCGGAATACCGCGACAGCGACGGCAACCATGTACAGGCTAAAGCGGGCGAAGCGTTACTGCTCGCCGCGCAGCCGGGCATTAGCTACAGCGAACATAATATCAGCAAAGTTAAGCCGTTAACCCGAATGCAACTGTGGCTTGACGCCTGTCCTGAACGGGAAAACACGCTGGTACAAAAAATC…	ATG	TAG
copS	ATGGTTAAGTTATCAATGACGCTGCGCCTGACAATTTCTTTTATCGCCATCCTTATCCTCGCCTGTACCGGCATTAGCTGGACGCTCTATAACGCGCTGAGCAAAGAATTAACGTATCGGGATGATATGACGCTAATAAATCGGGCGGCGCAAATGCAGCAACTGTTACTGGATGGCGCCAGGCCGGAAAATCTGCCGCTCTATTTCAATCGGATGGTGGATACGAAGCAGGACATCTTATTGATCCATTCAGCAACAGGCCACAATGTTGCGATTAATCATAGCGGCATCCCCGACCAACGCTTTAACGAGATTCCGCTGACTAAAAACATCACCCGCGAAACCTTATTTCGCCAGGCGGTACAAGGCACGGAACTGACCGCGGTACGCGTAAGCGCC…	ATG	TAA
napA	ATGAAACTCAGTCGTCGTAGCTTTATGAAAGCTAACGCCGTTGCGGCCGCTGCGGCGGCTGCCGGTCTGAGCGTGCCGGGCGTCGCCCGCGCCGTTGTCGGGCAGCAGGAAGCCATCAAATGGGATAAAGCGCCGTGCCGTTTTTGCGGAACGGGTTGCGGTGTGTTGGTGGGAACGCAGCAGGGCCGTGTGGTCGCCTGCCAGGGCGACCCCGACGCGCCGGTCAACCGTGGTCTGAACTGCATTAAAGGCTACTTCCTGCCCAAAATCATGTACGGTAAAGATCGTCTGACGCAGCCGATGCTGCGCATGAAAGACGGCAGCTATCACAAAGACGGCGAGTTTACGCCGGTGAGCTGGGAACAGGCCTTCGATGTGATGGAAGAGAAGTTTAAAACC…	ATG	TAA
typA	GTGATCGAAAATTTGCGTAACATCGCCATCATCGCGCACGTTGACCATGGTAAAACTACCCTGGTTGATAAGCTGCTCCAGCAATCCGGTACGTTCGACGCGCGTGCCGAAACTCAAGAGCGAGTGATGGACTCCAACGATTTGGAGAAAGAGCGTGGTATTACTATCCTCGCTAAAAACACCGCTATTAAATGGAATGATTACCGTATCAACATCGTTGATACTCCCGGGCACGCTGACTTCGGTGGTGAAGTAGAGCGCGTCATGTCCATGGTTGACTCTGTGCTGCTGGTGGTTGACGCATTTGACGGCCCGATGCCGCAAACGCGCTTCGTGACCAAAAAAGCCTTTGCTCATGGCCTGAAACCCATTGTGGTTATCAACAAAGTTGACCGTCCT…	GTG	TAA
recD	ATGACAATCCAGGAGCGGTTGCTGGAGGCCGTTGAACAAAAACTCTTACGGCCCATTGATGCCCAGTTTGCTTTAACCGTCGCCGGTAACGACGATCCCGCCGTGACGCTGGCGGCAGCGCTGCTTAGTCATGACGCAGGTGAAGGTCACGTGTGTCTGCCGTTGTCGCGTTTAACGTTAACGGAGGAGGCGCATCCCTTACTGGTCGCCTGTATAAGCGAAACGGCTACGCCAATCGACTGGAAAAAGCGGTTACTGGCGTCTGCGGCGGTTAGCTGCGGCGATAGCCCCGCGCCGTTAATTCTGTGCGGCGAGCGTCTCTACCTGAATCGCATGTGGTGCAACGAACGTACGGTTGCGCGCTTTTTTAACGAGGTTAACCAGGCCATCGCCGTAGAT…	ATG	TAA
rpsR	ATGGCACGTTATTTCCGTCGTCGCAAGTTCTGCCGTTTCACCGCGGAAGGCGTTCAAGAGATCGACTATAAAGATATCGCTACGCTGAAAAACTACATCACCGAAAGCGGTAAGATTGTCCCAAGCCGTATCACCGGTACCCGTGCAAAATACCAGCGTCAGCTGGCTCGCGCTATCAAACGCGCTCGCTACCTGTCTCTGCTGCCGTACACTGATCGCCATCAGTAA	ATG	TAA
kdpB	ATGAGTCGCAAGCAACTGGCGCTGTTTGAACCTGTTTTACTCGTACAGGCGCTAACGGATGCCGTAAAAAAATTAAGCCCACGCGCCCAGTGGCGTAACCCGGTGATGTTTGTGGTCTGGGCCGGCAGCGTGCTAACCACTCTGTTAACGCTCGCTATGGTAACAGGACAAATAGCGGGAAGCGCCTTGTTTACAGGGATTATCAGCCTGTGGTTATGGTTCACCGTACTGTTCGCCAATTTTGCCGAAGCGCTGGCGGAAGGCCGCAGCAAAGCCCAGGCAAACAGTCTGAAAGGGGTGAAAAAGACCGCGTTCGCTCGCCGCCTGCGCGCCCCTCGCCATGATGCGCAGGCCGATAACGTGCCCGCCGCTGAACTGCGGAAAGGCGACATTGTCCTG…	ATG	TGA
SL1344_4153	ATGCGTTATCAATACGTATGCCTGGTCTGCGCTATGACTTTCTTGTCTGCCGACGCTGCCGAACCGCCGCGCGCTTCCCTGCAATGGCGCAACGAAGTGATTCGTACCGCGCGCGAAATCTGGGGGCTTAACGCCCCCGTTGCTGATTTTGCCGGGCAACTACATCAGGAATCCGGCTGGGCGCCTGACGCGCTTTCTCCGGCTGGCGCGCAGGGTATGGCGCAATTTATGCCTGCGACGGCAAAATGGGTGAGCCAGTTGTACCCGGAACTCCACGAAAACAAGCCGTTTAATCCCGCCTGGGCGATACGCGCGCTGGTACAGTATGACCGCCAGTTGTGGAAAAGCGTGTTAGCAAAAAATAGCTGCCAGCGAATGGCTTTCACTCTGAGCGCCTAT…	ATG	TAA
SL1344_1659	ATGGCCGAACATCGTGGTGGTTCAGGAAATTTCGCCGAGAATCGTGAAAAAGCATCTGAAGCGGGCCGCAAAGGCGGTCAGCATAGCGGCGGGAATTTCAAAAACGATCCGCAACGAGCTTCTGAAGCCGGTAAAAAAGGTGGTCAGAATAGTCACGGCGGACGTAAATCCGATAATTCCTGA	ATG	TGA
ppiD	ATGATGGACAGCTTACGCACGGCTGCAAACAGTCTCGTGCTCAAGATTATTTTCGTTATCATTATCGTGTCGTTCATTTTGACCGGCGTTAGTGGTTACCTGATTGGCGGAAGCAATAACTACGCCGCAAAAGTGAATGGCCAGGAAATCAGCCGGGCACAGTTTGAGAATGCGTTTAACAACGAACGTAACCGTATGCAGCAGCAGTTGGGCGACAGGTATTCTGAACTGGCGGCCAACGAAGGTTATATGAAAAGCCTGCGCCAGCAGGTGCTGAATCGTCTGATAGATGAAGCGCTGTTGGATCAATATTCCCGCGAACTGAAACTGGGCATCAGCGATGAGCAGGTAAAGCAGGCGATTTTCGCCACTCCCGCTTTTCAGGTGGACGGTAAGTTT…	ATG	TAA
bioD	ATGCTGAAGCGTTTCTTTATTACAGGTACAGACACTTCTGTTGGGAAGACGGTGGTTTCCCGCGCATTACTACAAGCGTTAGCGTCGAGTGGTAAGAGCGTTGCAGGGTATAAACCTGTCGCTAAAGGGAGCAAAGAGACTGCAGAAGGGATGCGCAACAAAGATGCGCTGGTATTGCAAAGCGTCTCTTCGCTGGAGTTGCCGTATGAGGCGATTAATCCGATCGCGTTAAGCGAAGAAGAAAGCAGCGTCGCGCATAGCTGTCCTATAAATTACACCTTGCTGTCCAACGGTCTGGCGAGCCTGAGCGATAAAGTGGACCACGTGGTTGTGGAGGGTACTGGCGGCTGGCGTAGTTTGATGAATGATTTACGTCCATTGTCTGAATGGGTGGTACAG…	ATG	TAA
mtn	ATGAAAATCGGCATCATTGGCGCAATGGAAGAAGAAGTTACGCTGCTGCGTGACAAAATTGACAACCGTCAGACGATTACGCTGGGCGGCTGCGAAATTTACACTGGCCAGTTGAACGGCACCGAAGTGGCGTTGCTGAAATCCGGTATCGGTAAAGTCGCGGCGGCGCTGGGCGCAACGTTGCTTCTGGAGCACTGCAAGCCGGACGTGATCATCAATACCGGTTCCGCAGGCGGTCTGGCGTCCACGCTGAAGGTCGGCGATATCGTCGTCTCTGACGAAGCGCGTTACCACGACGCTGATGTGACCGCTTTCGGCTATGAATACGGGCAATTACCGGGCTGTCCGGCCGGATTTAAGGCCGATGACAAACTGATCGCCGCCGCGGAATCCTGCATC…	ATG	TAA
SL1344_2582	ATGGCGCACGAATTACAACTCATCAAGCAGTCATCTGGAATTCTGATCCCCGCAACGCCGGAGACCAGTGATATTCTGCAATCAAAAATCAAACTCGGCGCCGTGCTGGTGGCTGAGTTCCGTCAGGTGAGGAATCCTGCATTCCATCGCCGCTTTTTTGCGTTGCTTAATCTTGGGTTTGAATACTGGGAACCCACCGGCGGCGCCATTTCTGCCAATGAGCGCAAACTGGTAAACGGTTATGCAAAGTTTCTCGCTGCATATGGCGGGAATGAAAGCGCATTACTGGATGCGGCTGAACAGTATCTGGAACAGATTGCAAACCGCCGGGTAACAAACGGAATTAGCCTCTGTAAATCTTTCGATGCATACCGCGCATGGGTGACGGTTGAGGCTGGT…	ATG	TGA
SL1344_1186	TTGTTCCTGGTGGTCTTACCGCCAGTTGCTGAAAAAGACAACGATAATGTAACTGTTGCAGAGACTGACGAATACGACGACCGTGAATTTTATTTTTGGCGACCATATTTCCTCCCAAAAGGCCGCCCGAAGGCGGCGCTGGGTTTGATAATGGAGAAGGGCGTTGGTCACTGCCATAACCAACCTGTATACATTAATGCAATTGATAATCATTATCAATTTGGCTGGTGGAGAAAAATTGTAAAGATGAAGGGACAGCGGAAATGGCAATGA	TTG	TGA
ppk	ATGGGTCAGGAAAAGCTATATATCGAGAAAGAACTGAGCTGGTTAGCATTTAACGAACGCGTGTTACAGGAAGCAGCGGATAAATCCAACCCGTTGATTGAGCGGATGCGGTTCCTGGGAATCTATTCTAATAACCTCGACGAGTTCTACAAAGTGCGTTTCGCTGAACTGAAACGACGTATTATTATCAGCGAAGAACAGGGTTCAAATTCTCATTCACGCCATTTGTTAGGCAAAATTCAGTCCCGCGTGTTGAAAGCAGACCAGGAGTTCGACGGCCTGTACAACGAATTACTGCTGGAAATGGCGCGTAATCAAATCTTTCTGATCAACGAGCGTCAGCTCTCGGTGAACCAACAAAGCTGGTTGCGCCACTATTTTAAGCACTATTTGCGCCAG…	ATG	TAA
SL1344_3207	ATGGCTAAAGAGAGAGCGCTGACGCTTGAAGCATTGCGTGTGATGGACGCCATTGACCGCCGGGGCAGTTTTGCCGCAGCGGCTGATGAGTTGGGGCGTGTGCCCTCCGCGCTGAGTTACACCATGCAGAAGCTGGAAGAAGAGTTGGACGTTGTACTGTTCGATCGCTCCGGCCATCGTACAAAATTCACCAACGTCGGACGTATGCTGCTGGAACGCGGGCGGGTATTGCTGGAAGCGGCAGACAAGTTAACGACGGATGCTGAAGCGTTGGCCCGCGGTTGGGAAACGCATCTGACGCTAGTCACTGAAGCTCTGGTACCGACGCCTGCTTTTTTTCCACTGATCGACCGGCTGGCCGCTAAAGCCAATACGCAGCTTTCATTGATTACCGAAGTA…	ATG	TAA
pipD	ATGAAAAAGTATCTTGCATTCGCCGTTACGCTGCTGGGTATGGGTAAAGTCATCGCCTGTACTACCCTTTTGGTAGGCAATCAGGCTTCGGCTGACGGCTCCTTCATTATCGCGCGCAACGAAGATGGCTCGGCAAATAACGCCAAGCATAAGGTTATTCATCCCATCGCGTTTCATCAACAAGGCGAGTATAAAGCACATCGGAACAATTTTAGCTGGCCGCTTCCGGAGACAGCGATGCGCTATACGGCGATTCATGACTTTGATACTAACGATAACGCCATGGGTGAAGCCGGTTTCAATTCGGCGGGCGTCGGAATGAGCGCAACGGAAACCATTTATAACGGCAGAGCGGCGCTGGCTGCCGATCCTTACGTGACAAAAACGGGAATCACGGAA…	ATG	TAA
PK-repZ	AGGAAAACCCCCACTATCTTTCTTACGAACTTGGCGGAACGACGAAAGATAGTGGGGGCCTCACAGAATACGGGTAAAGTATAATGAAACCGTACCAGAGATTCAACCCTGTGCAGTGTATAAATACACGGCACAATCGCTCCGCCA	AGG	CCA
napG	ATGTCCCGTACAGCGAAACCCCAAAATGGCCGCCGCCGCTTCCTGCGTGATGTTGTGCGCACTGCGGGCGGGCTGGCGGCGGTTGGCGTGGCGCTGGGCTTGCAACAGCAAACCGCGCGCGCATCGGGCGTGCGGCTGCGTCCGCCTGGCGCGCTGAATGAAAATGTCTTCGCCAGCGCCTGTGTGCGCTGCGGGCAGTGCGTTCAGGCGTGTCCATACGACACGCTAAAACTGGCGACGCTGGCCTCCGGGCTATCGGCAGGCACGCCCTATTTCGTCGCTCGCGACATCCCCTGCGAAATGTGTGAAGACATTCCGTGCGCCAAAGTCTGCCCCAGCGGGGCGCTGAATAAAGATATCGCCTCCATTGATGACTCGCGCATGGGGCTGGCGGTGCTG…	ATG	TAA
glnA	ATGTCCGCTGAACACGTTTTGACGATGCTGAACGAGCACGAAGTGAAGTTTGTCGATCTGCGCTTCACCGATACCAAAGGCAAAGAACAGCACGTCACGATTCCTGCTCATCAGGTAAATGCCGAATTCTTTGAAGAAGGCAAAATGTTTGACGGCTCCTCTATCGGCGGCTGGAAAGGCATTAACGAATCCGACATGGTGCTGATGCCCGATGCGTCCACTGCGGTTATCGACCCGTTCTTCGCGGACTCCACCCTGATTATCCGTTGTGACATCCTGGAGCCTGGCACTCTGCAAGGTTATGACCGTGACCCACGTTCCATCGCAAAACGTGCGGAAGACTACCTGCGCGCGACCGGTATCGCCGATACCGTCCTGTTTGGGCCGGAACCTGAATTC…	ATG	TAA
argA	ATGATAAAGGAACGTAAAACCGAACTGGTAGAAGGGTTTCGCCATTCAGTTCCCTATATCAACACCCATCGCGGAAAAACCTTTGTCATTATGCTCGGCGGCGAAGCCATTGAGCATGACAATTTTTCCAGCATCGTTAGCGATATCGGGCTACTGCATAGCCTCGGTATTCGCCTTGTCGTGGTGTATGGCGCGCGACCGCAAATCGACGCCAATCTGGCCGCGCATCATCATGAACCGATTTACCACAAAAACACGCGGGTGACGGACGCCAAAGCACTGGAGCTGGTGAAACAGGCCGCCGGTTTACTCCAGCTTGATATTACCGCCCGTCTGTCGATGAGTCTGAACAATACGCCGTTGCAGGGCGCGCACATTAATGTCGTCAGTGGCAATTTC…	ATG	TAA
priB	ATGACCAACCGTCTGGCGTTGTCCGGCACCGTGTGCAGGGCCCCCCTTCGAAAGGTCAGTCCATCAGGAATTCCGCATTGCCAGTTCGTGCTTGAGCATCGTTCTGTGCAAGAGGAAGCCGGCTTTCACCGGCAGGCGTGGTGCCAAATGCCCGTTATTGTTAGCGGACACGAAAACCAGGCCATTACTCACAGTATAACGGTCGGCAGCCGCATAACCGTTCAGGGGTTTATTTCTTGCCACAAGGCAAAGAACGGTCTGAGCAAAATGGTTCTGCATGCCGAGCAGATTGAATTGATAGATTCTGGAGACTAG	ATG	TAG
creA	ATGAAATACAAGAGCTTAGTACTTTTCTCAATTTTGTTGCTGCTGGGGCAGAGCGCCCGCGCGGAACAAATTGGTTCAGTCGATACGGTATTTAAAATGTTCGGTCCTGACCATAAAATCGTGGTGGAAGCTTTTGACGATCCTGATGTCAAAAACGTGACGTGCTATGTTAGCCGGGCGAAAACGGGCGGCATAAAAGGCGGATTGGGGCTGGCGGAAGATACGTCTGACGCCGCTATCTCTTGCCAGCAGGTCGGGCCTATTGAACTGAGCGACAAAATTAAGAACGGCAAGGCGCAGGGAGAGGTGGTGTTCAAAAAACGCACCTCATTGATATTTAAGTCATTGCAGGTCGTGCGTTTCTATGATGAGAAACGCAACACGCTGGCGTATCTGGCC…	ATG	TAA
kdpC	ATGATCGGTTTACGTCCTGCTTTTTCGACAATGTTATTTCTGCTGTTATTGACTGGCGGCGTGTATCCGCTTCTGACCACGGCGCTGGGGCAGTGGTGGTTTCCCTGGCAGGCTAATGGCTCGCTGATTCATAAAGACAATGTGATACGCGGCTCAGCGCTTATCGGACAATCGTTTACCGCCGCGGGCTATTTTCATGGCCGGCCCTCCGCCACCGCCGATACGCCTTATAATCCACTGGCGTCGGGCGGAAGCAACCTGGCCGCCAGCAATCCCGAACTGGATGCGCAAATACAGGCCCGCGTCGCCGCGCTACGCGCCGCTAACCCCCAGGCGAGTTCCGCGGTTCCGGTTGAGCTGGCGACGGCCTCGGCAAGCGGGCTGGATAATAATCTGACG…	ATG	TGA
trpA	ATGGAACGCTACGAAAATTTATTTGCCCAACTCAACGATCGCCGGGAAGGCGCTTTTGTCCCCTTCGTGACCCTGGGCGACCCTGGCATTGAACAGTCACTGAAAATTATTGACACACTGATTGACGCTGGCGCCGACGCTCTGGAACTGGGGGTTCCCTTCTCCGATCCGCTGGCCGATGGCCCTACCATCCAGAATGCGAACTTACGCGCCTTCGCCGCTGGCGTCACGCCGGCTCAGTGTTTTGAAATGCTGGCGCTGATTCGTGAAAAACACCCGACCATTCCGATTGGCCTGCTAATGTACGCGAATCTGGTGTTCAATAACGGCATAGATGCGTTCTATGCCCGTTGTGAACAGGTTGGCGTAGATTCCGTGCTGGTCGCAGATGTCCCGGTT…	ATG	TAA
hupB	GTGAATAAATCTCAACTGATCGAAAAAATTGCTGCAGGGGCTGATATCTCTAAGGCTGCGGCTGGACGTGCGTTAGATGCGATTATTGCTTCTGTTACCGAATCTCTGAAAGAAGGGGATGACGTTGCACTGGTAGGCTTTGGTACTTTTGCTGTTAAAGAGCGTGCTGCCCGTACTGGTCGCAACCCGCAAACAGGTAAAGAGATCACCATCGCCGCTGCCAAAGTGCCGAGTTTCCGTGCAGGTAAAGCGCTGAAAGACGCGGTAAACTAA	GTG	TAA
SL1344_1418	GTGGTTGCTGATAGTCAGCCTGGGCATATCGATCAAATTAAGCAGACCAATGCTGGCGCAGTGTATCGCCTGATTGATCAGCTCGGACCGGTATCGCGAATTGACCTGTCTCGTCTGGCGCAGTTGGCGCCTGCCAGTATTACGAAAATTGTTCGCGAAATGCTGGAAGCGCATTTGGTTCAGGAACTTGAAATTAAAGAGGCGGGCAGTCGTGGACGTCCCGCCGTCGGGCTGATGGTGGAAACGGAAGCCTGGCACTATTTATCTATTCGTATTAGCCGTGGCGAAATTTTCCTTGCACTGCGCGATCTTAGCAGCAAACTGGTGGTAGAAGAGTGTCTGCCGCTGCCGTTAACCGAAGCCACGCCGTTGCTTGAGCGAATTATTACGCACGTTGAT…	GTG	TAA
SL1344_2581	ATGGCTAAATTACCGCGCCGTAAGTGCGCAAACAAAGAATGCCGCCAGTGGTTTCACCCGATACGCGAGGGGCAGATCGTTTGCTCGTACCAGTGTGCCAGCGCCGTCGGCAAAGAACAAACCAGAAAAGCTCGCGAAGCCGCGCAACGTAAGGCGCAATCCCTTCAGCGCGCCGCTGAGAAAAAAGAACGCGCCGCCTGGCGCCAGCGGAAAGCCGCGGTTAAGCCGCTGAAACACTGGATTGACTTGACGCAGCGCGCCGTAAATGACATTTGCCGCGAAACCGAACTGGCAGAAGGACTCGGTTGCATCTCCTGTGGAACGAAGACGGCATTCGCATGGCATGCAGGCCATTACAGGAGTACGGCCGCCGCCGGGCATCTGCGCTTCACTCGCTTC…	ATG	TGA
cbiK	ATGAAAAAAGCGCTTCTGGTGGTCAGTTTTGGCACCAGCTATCACGACACCTGTGAAAAAAACATTGTGGCGTGCGAACGTGATCTGGCGGCGTCCTGTCCCGATCGCGACCTGTTTCGCGCCTTCACTTCCGGAATGATCATTCGCAAGCTTCGCCAGCGTGACGGTATCGACATCGATACGCCATTACAGGCTTTGCAAAAGCTTGCCGCACAGGGATATCAGGACGTGGCGATTCAGTCGTTGCACATTATTAACGGCGACGAATATGAAAAAATTGTCCGTGAAGTACAACTCTTGCGTCCGTTATTCACTCGCCTGACGCTGGGCGTGCCGCTGTTGAGCAGCCATAACGATTATGTGCAGCTAATGCAGGCGTTGCGACAACAGATGCCATCG…	ATG	TGA
SL1344_4468	ATGGTAGAGGCGCTTTTACTTGGACTGGTGGCGTTTATCGCCCAGTCTGAATATGCATTAGGGACGTCGCTGATTTCCAGACCTATCGTGACCGGACTTTTAACCGGACTGGTGCTGGGCGACATGGAAACCGGAATTGTGATGGGCGCGACGCTGGAGTTGGCGTTTATCGGTTCCTTTTCGGTGGGCGCGTCGCTGCCCCCGGATGTGGTCACTGGCGGTATTTTAGGTGTGGCCTTTGCGATTAATTCCGGCGCTGGGGCGGAAACCGCGCTGTTATTAGGTTTGCCTATCGCGACACTGGCGTTAATTGTGAAAAATATCTATAACGGAATGTTTATTCCGTTGCTCTGTCATAAAGCCGATGCTTACGCTGAGGTGGGGGATACCCGGGGCATT…	ATG	TGA
purN	ATGAATATTGTGGTGCTGATTTCCGGCAATGGAAGCAATTTACAGGCGATTATCGATGCCTGCGAAGCGAAGAAAATTAAAGGCACCCTCAGGGCAGTATTCAGCAATAAGGCCGACGCGTTCGGCCTTGAACGCGCCAGAGAAGCCGGTATTCCGGCGCAAGCGCTGACTGCCGATCGGTTTGACAGCCGCGACGCCTTCGATCGCGAGCTGATTCGCAAGATAGACGCGTATGCGCCCGATGTGGTCGTGCTGGCCGGTTTTATGCGTATTCTGAGTCCGATGTTTGTCGCGCATTACTACGGGCGTCTGCTGAACATTCACCCTTCCCTGCTACCAAAATATCCGGGGTTGCATACCCATCGCCAGGCGCTGGAAAACGGCGATGAGGAGCACGGT…	ATG	TAA
SL1344_2735	ATGATGATTTACTGCGCACGTATTACTGCCATCGGGCTGTTTGTCGCCGACGGCCTCACCGACAAGATGCTCATCACCTTCGACAGCAACGGGCCGAAGGACTGTCTCGATTACTCGCTGTCGCTGGAGCCGTCGTTCCGGGAAGAGAGCCTGATGATACTCCCCGGCGACCGCCTGCTGCTGGCAGGGCATGATTATCTGGTGACTGCCGTCGGCAAGGGGGTACAGCAGGCGCTGTTTGAACTCGGTCATCTGACGCTGGTGTTTGACGGTGACCTGAAGCCCTGCCACACCGGGGCGATTCATCTCTCCGGCCCGGTGCCGAAACTCCATGACCTGCACGGCAATCTGGTGATTGAGGAGGGACGGCCATGA	ATG	TGA
SL1344_3206	ATGGATTGGTATTTAAAGGTTTTAAAAAATTATCTGGGATTTGGCGGCCGCGCGCGACGCAAAGAGTACTGGATGTTTATTCTGGTCAATATCATCTTTACCTTTGTGTTGGGCCTGCTGGACGCCATGCTTGGCTGGCAACGCGCCGGGGGTGAAGGCGTTCTGACCACCATTTACGGCGTTCTGATCTTTTTACCGTGGTGGGCCGTGCAGTTCCGTCGTCTGCATGACACTGACCGCTCCGCATGGTGGCTACTGTTGCTACTTATCCCCATTATCGGCTGGCTTATCATCATCGCGTTCAACTGCCAGAATGGTACGCCGGGCGACAACCGCTTCGGCCCCGATCCGAAACGTTTTTCCTGA	ATG	TGA
SL1344_1032	ATGACACTCCAGGCAAATATCAGCAGAGAGACAAAAGCGGCAAAAACCCAGGAGGTATATAAGCACGTTGTTCTTTTCAAAATGGCCGCCCCCTCTTACATAAGACGATAA	ATG	TAA
napH	ATGGCAAATCGTAAACGCGACGCCGGGCGAGAAGCGCGGGCGAAAAAAGGCTGGTGGCGTAGCCACCGTTGGCTGGTGTTACGCCGTATCAGCCAGTTTATGGTGCTGGGGATGTTTCTCAGCGGCCCGTGGCTGGGCTTTTGGGTTTTGCATGGCAACTACAGCAGTAGTTTGCTGTTCGATACCCTCCCGTTGACCGATCCGCTGATTACCCTGGAAAGTCTCGCCAGTGGACATCTTCCCGCTACCGTGGCGCTGACGGGAGCAGTGATTATCGCTGTGCTGTATGCGCTGGCGGGAAAGCGATTATTTTGCAGTTGGGTTTGCCCGCTAAACCCCGTTACCGATTTGGCTAACTGGATGCGCAGGAAATTTGACCTGAACCAGTCTGCGACGATT…	ATG	TAA
glnL	ATGGCAAGCGGCATACAGCCCGATGCTGGGCAGATCCTCAATTCGTTAATCAACAGCGTGCTGGTGGTCGACGACGCGCTGGCAATCCATTACGCCAATCCTGCCGCGCAGCAGTTGCTCGCGCAAAGCTCACGCAAACTGTTCGGGACGCCGTTACCTGAACTGTTGAGCTATTTTTCGTTAAACATTGACCTGATGCGCGAAAGTTTAGCGGCAGGGCAAGGCTTTACCGATAACGAAGTGACGCTGGTGATTGATAGTCGCTCGCATATTCTCTCTTTGACCGCCCAACGTCTGCCCGACGATTTTATACTGCTCGAAATGGCGCCGATGGATAACCAGCGTCGTCTGAGTCAGGAGCAGTTGCAGCACGCGCAGCAAATCGCCGCCCGCGATCTG…	ATG	TAG
SL1344_2969	ATGTCGGGAGCCAATTCAGCAATCAGCCGTCGCCGTTTACTACAAGGCGCGGGCGCCATGTGGCTATTAAGCGTGAGCCAGGTCGGGCTGGCTGCCGTAAGCCAGGTCGTTGCGGTGCGTATCTGGCCTGCGTCCAGCTATACCCGCGTCACGGTAGAGTCGAATCGTCTGCTGAAATATAAACAATTTGCCTTAAGTAACCCGGACCGCGTGGTAGTAGATATTGAGGATGTGAATCTGAACTCGGTGCTTAAAGGCATTGGCGCGCAGATTCGCAGCGACGATCCGTATATCAAATCCGCAAGGGTAGGGCAGTTTGATCCTAAGACTGTGCGTATGGTCTTTGAGCTAAAACAAAACGTGAAGCCGCAGCTATTTGCGCTGGCGCCTGTGGCAGGC…	ATG	TAA
rpsF	ATGCGTCATTACGAAATCGTTTTTATGGTCCATCCTGACCAGAGCGAACAGGTTCCGGGTATGATCGAGCGTTACTCTGCCGCCATCACTGGCGCAGAAGGCAAGATCCACCGTCTGGAAGACTGGGGCCGCCGTCAGCTGGCTTACCCGATCAACAAACTGCACAAAGCGCACTACGTTCTGATGAACGTTGAAGCGCCGCAGGAAGTGATCGATGAGCTGGAAACTACCTTCCGCTTCAACGATGCCGTTATCCGCAGCATGGTTATGCGTACTAAGCACGCTGTTACCGAAGCTTCTCCGATGGTTAAAGCGAAAGACGAGCGCCGTGAGCGTCGCGATGATTTCGCTAACGAAACCGCAGATGATGCTGAAGCTGGGGATTCTGAAGAGTAA	ATG	TAA
kdpD	ATGAACGACGAACCCTTGCGTCCTGATCCGGATCGCTTGTTGGAACAAACGCCCCCGCCCCACCGGGGGAAGTTGAAAATTTTCTTCGGCGCCTGCGCAGGTGTCGGAAAAACCTGGGCGATGCTGGCGCAAGCGCAGCGGCTGCGAGCGCAGGGGCTGGATGTGGTGATCGGCGTGGTAGAGACGCATGGCCGTAAAGAGACCGCCGCACTACTTGACGGGCTGACCATTCTGCCGCCAAAACGTCACTCGCACCGGGGGCGGCAAATCCGCGAATTTGACCTGGATGCCGCCCTCGCCCGGCGTCCGGCGCTGATTTTAATGGATGAGCTGGCGCACAGTAACGCGCCTGGCTCACGCCATCCTAAGCGCTGGCAGGATATTGAAGAGCTGCTGGAA…	ATG	TGA
SL1344_4152	ATGAAACTCAGTATCGATTTTTGGGAAGTCATCTCCCTCTTACTTTCGTTTGTTGGATTAATGTTTGCTGCCGGTAAATTGCTGCTGGCGCAAATTGAAAAACGGCTGAATGAACGTTTTGAAGCACTGGAAGCTGCCCGGCGCGAATCAGAAGCGGGCTGGTCCAGGCTGGAGAGAGAATTTCTGGAATTTCGCGCCGATTTACCGCTGCATTATGTCCGCCGCGAGGATTATCTTCGCGGCCAGGCCGTTCTGGAAGCAAAACTGGATGCGCTATATAGCAAAATAGAACTGATTCAACGAGGTAACCATTAA	ATG	TAA
trpB	ATGACAACACTTCTCAACCCCTACTTTGGTGAATTCGGCGGCATGTATGTGCCGCAGATCCTGATGCCTGCGCTGAACCAGCTTGAAGAGGCCTTCGTCAGCGCGCAAAAAGATCCTGAATTTCAGGCGCAATTCGCCGATCTGCTAAAAAACTACGCGGGACGCCCCACCGCGCTGACGAAATGCCAGAACATTACCGCCGGTACGCGTACCACGTTGTATTTAAAGCGCGAAGATTTACTGCACGGCGGCGCGCACAAAACCAATCAGGTACTGGGTCAGGCGCTGCTGGCCAAACGGATGGGTAAAAGCGAGATTATCGCTGAAACCGGCGCCGGTCAGCACGGCGTCGCCTCTGCGCTCGCCAGCGCCCTGCTGGGTCTGAAATGCCGTATCTAT…	ATG	TGA
lon	ATGAATCCTGAGCGTTCTGAACGCATTGAAATCCCCGTATTGCCCTTGCGCGATGTGGTGGTTTATCCGCACATGGTCATACCCTTATTTGTAGGGCGGGAAAAATCTATCCGTTGTCTGGAAGCGGCTATGGACCATGATAAAAAAATCATGCTGGTCGCCCAGAAGGAAGCATCGACGGATGAGCCGGGTGTAAACGATCTTTTCACCGTCGGGACCGTGGCCTCTATTTTGCAGATGCTGAAACTGCCTGACGGCACCGTAAAAGTGCTGGTCGAGGGGTTACAGCGCGCGCGTATTTCCGCGCTGTCTGACAACGGCGAACATTTCTCCGCGAAGGCGGAGTACCTTGATTCGCCAGCCATTGATGAGCGTGAACAAGAAGTGCTGGTGCGTACC…	ATG	TAG
SL1344_3552	ATGGACAAAATGAAGCGTCATCTGGTGTGGTGGGGAGCGGGGATTCTTGTGGCGGTGGCCGCGATAGCCTGGTGGATGCTGCGCCCTGCGGGAATACCGGAGGGGTTTGCCGCCAGCAACGGCAGAATTGAAGCCACCGAAGTGGATATTGCCACTAAGATTGCCGGGCGTATTGATACCATCCTCGTTTCGGAAGGGCAGTTCGTTCGTCAGGGCGAGGTGCTGGCGAAAATGGATACCCGCGTGCTGCAGGAGCAGCGGCTGGAGGCGATTGCGCAGATTAAAGAGGCCGAAAGCGCGGTTGCCGCCGCCCGTGCCTTGCTGGAGCAACGCCAGAGTGAAATGCGCGCCGCGCAGTCGGTCGTCAAACAGCGGGAAGCTGAGCTGGACTCCGTCTCT…	ATG	TGA
SL1344_1417	ATGAATATCGAATTACGTCATTTACGTTACTTTGTGGCGGTAGCAGAAGAGCTGCATTTTGGTCGCGCCGCCGCGCGCCTCAATATCTCGCAGCCGCCGCTGAGTCAGCAGATACAAATTCTGGAGCAGCAGGTCGGCGCGCGATTACTGGCGCGGACCAACCGCAGCGTAGCGTTAACCGCCGCCGGGCGACAGTTTCTGGTGGATAGCCGACACATCCTGAGTCTGGTAAACGACGCCGCCGCTCGCGCCGAGCGGTTGCATCAGGGCGAAGCGGGTGAAATCCGTATTGGCTTTACGTCTTCAGCGCCTTTTATTCGGGCGGTATCGCATACCTTTTCGCTGTTCCGCCAGTCCTATCCGGGAGTGCATATGCAAACGCGTGAAATGAATACGCGT…	ATG	TAA
btuF	ATGGCTAAGCAAATGTTCAGGGCGCTGGTCGCCCTGCTGCTTACGCTCCCGGTGTGGCTTTACGCTGCGCCGCGCGTCATTACCCTCTCTCCCGCCAATACGGAGCTCGCTTTTGCCGCCGGGATTACGCCCGTTGGCGTCAGCAGCTATTCCGACTACCCGCCCGAAGCGCAAAAAATAGAACAAGTCTCTACCTGGCAGGGAATGAATCTGGAACGCATTGTGGCGCTGAAGCCGGATCTGGTCGTCGCCTGGCGCGGCGGTAATGCGGAACGCCAGGTAAACCAACTGACGTCATTAGGTATTAAGGTCATGTGGGTGGACGCGGTAACCATCGAACAGATCGCCGACACGCTCCGTCAACTGGCCGCCTGGAGCCCGCAGCCGGAAAAGGCTCAG…	ATG	TAG
SL1344_2580	ATGAAACCAGAACTGATCGAGATACTCCGCATGCGCTGGCAGCGCCTCCGCATATACCGCCGTCCGGGGTCGGTGTTGGTTGACTACCGCATCCTGCGCAATTTTGTTCGTATTTATCAGTTCACAGGATTTACTCAATGA	ATG	TGA
SL1344_1185	ATGATGAAACGTAAATTGATCCCATTTACCCTCTTTCTCGCTGCGCTTAGCGCCAGTACCACCTCTATAGCAGCTTCGCAGGAGATTTCTAAATCTATATACACCTGTAATGATAACCAGGTTATGGAGGTGATTTACGTCAACACCGAGGCTGGAAACGCCTATGCGATTATCAGTCAGGTAAACGAGATGATCCCGATGCGGTTAATGAAAATGGCCTCCGGAGCAAATTACGAAGCCATAGACAAAAATTATACTTATAAACTTTATACCAAAGGCAAAACGGCTGAACTGGTGGAAGGTGATGATAAACCTGTTCTCAGTAACTGTTCCTTAGCTAACTAA	ATG	TAA
SL1344_3487	ATGGCTAATCCACTTTTGTTCCGTTCGCTGTTAAGGGACGCGCCGCTGGCCAACGCCAGCAATCAGCAAGGCGCAGCGGCCTTTGCCTTCACCCCGCGCCATAAACTGGCGCAAATGGTGATGACCGGCTGCATGAACGAGACTTTTTATGCCAGCGGCCAGGCGCAGCTAAATGATGTTCTGGCGACGGCGAAAGATCTCGACGATCTGTTTTTAGCGCAACTGGCGATTTATGGCCGCGAACGCGGGATGATGAAGGATATGCCCGCGCTGTTGACCGCCATTCTGGCGGCGCGTGGTTCGGCGCTGCTGCCGGTAGTATTTACGCGGGTGATCAACAATGGCCGGATGCTGCGTAACTTTGTGCAAATGTTGCGCAGCGGCGTGACCGGGCGGCGC…	ATG	TAA
purM	GTGGGGAACCAGGCAGTGACCGATAAGACCTCTCTTAGCTATAAAGATGCCGGCGTCGATATTGATGCGGGTAACGCTCTGGTTGATCGAATCAAAGGCGTAGTGAAGAAAACTCGCCGCCCGGAGGTTATGGGCGGTCTGGGCGGTTTCGGTGCGCTGTGCGCGTTGCCGCAAAAATATCGTGAACCGGTACTGGTTTCCGGCACTGACGGCGTAGGTACCAAACTTCGCCTGGCGATGGACTTAAAGCGTCACGACGCTATCGGTATTGATCTGGTGGCAATGTGCGTAAACGATCTGGTCGTTCAGGGCGCGGAACCGCTGTTTTTCCTCGATTACTATGCCACGGGTAAACTGGATGTCGATACCGCCGCCAGCGTGATCAACGGTATTGCCGAA…	GTG	TAA
SL1344_3205	ATGGGACAACTGATCGATGGCGTCTGGCACGATACCTGGTATGACACCAAATCTTCCGGGGGGAAATTTCAGCGTTCAGCGTCGGCTTTCCGCAACTGGCTTACCGCTGACGGCGCGCCCGGACCTTCCGGCGAAGGCGGATTCGCCGCAGAAAAAGATCGTTACCATCTGTACGTTTCCCTTGCCTGCCCCTGGGCGCATCGCACGCTCATTTTCCGTAAACTGAAAGGTCTGGAGCCGTTTATTCCGGTTTCCGTCGTGAATCCATTGATGCTGGAAAACGGCTGGACGTTTGATGATACTTTTCCGGCGGCCACCGGCGATACCCTCTATCAGCATGAATTTCTCTACCAGTTGTATCTGCACGCCGATCCACACTACAGCGGCCGCGTCACCGTA…	ATG	TAA
SL1344_1031	ATGCCAGCAAAGCCCCGGACAAGTAAGACCGTGACGAAGAATATTCGTTTTTCCTATTCCATGCTTGAACAGATAGAATTCGCGTTGAAATCTGAAAAGACGCGGAATTTTTCAGCATGGGTAAAAGAGGCCTGTCGGGAAAAGTTATGTAACACGGGACATAAGCTGTAG	ATG	TAG
rplW	ATGATTCGTGAAGAACGTCTGCTGAAGGTGCTGCGCGCACCGCACGTTTCTGAAAAAGCGTCTACTGCGATGGAAAAAACCAACACCATCGTTCTCAAAGTTGCTAAAGACGCGACCAAAGCAGAAATCAAAGCTGCTGTGCAGAAACTGTTTGAAGTCGAAGTCGAAGTCGTTAACACCCTGGTCGTTAAAGGGAAAGTTAAACGTCACGGACAGCGTATCGGTCGTCGTAGCGACTGGAAAAAAGCTTACGTCACCCTGAAAGAAGGCCAGAATCTGGACTTCGTCGGCGGCGCTGAGTAA	ATG	TAA
napB	ATGAAAAGCCATGACCTGATGAAAGCGCTGTGTCAATGGATGGCCACGCTTGCCCTGGTGGTAAGTGGTGCGGTTTGGGCGGCAAACGGAGTGGATCTGAGCCAGTCGCCGGAAGTATCCGGGACGCAGGAAGGGGCGATTCGTATGCCGAAAGAGCAGGAACGTATGCCGCTAAATTACGTCAACCAGCCGCCGATGATCCCGCACAGCGTCGAGGGCTACCAGGTGACGACCAATACCAACCGCTGTCTGCAATGCCACGGCGTGGAAAGTTATCGTACGACGGGCGCGCCGCGTATCAGTCCGACGCACTTTATGGACAGCGACGGTAAAGTGTCGGGCAACGTCGCGCCGCGTCGTTATTTCTGCCTGCAGTGCCACGTACCGCAGTCTGATACC…	ATG	TAA
glnG	ATGCAACGAGGAATAGTCTGGGTCGTCGATGATGATAGTTCCATCCGTTGGGTGCTTGAGCGTGCTCTCGCCGGGGCAGGGTTGACCTGTACCACCTTTGAGAATGGTAATGAAGTACTGGCTGCGCTGGCCAGTAAAACGCCGGACGTCTTGCTGTCGGATATCCGAATGCCGGGAATGGACGGGCTGGCGCTATTAAAGCAGATTAAACAGCGTCACCCGATGCTTCCGGTCATCATTATGACCGCGCATTCCGATTTAGATGCCGCCGTGAGCGCCTATCAGCAGGGGGCGTTTGATTATCTGCCTAAACCGTTTGATATTGATGAAGCCGTCGCTCTGGTCGAGCGCGCGATTAGCCACTATCAGGAGCAGCAACAGCCGCGTAATATCGAGGTT…	ATG	TAA
mltA	ATGAAAGGACGTTGGGCAAAATATGTGGCGACAGGCGTAATGCTGGCAATGCTGGCTGCCTGTTCATCAAAACCGACCGATCGCGGTCAGCAATATAAGGACGGGAAATTTACCCAGCCCTTCTCCCTGGTAAACCAGCCGGACGCAGTGGGCGCGCCGATTAATGCTGGAGACTTTGCCGAGCAGGTCAACCAGATCCGTTCCGCGTCGCCGCGTTTATACACCAATCAAAGCAACGTCTATAACGCTGTCCAGAACTGGTTACGTTCCGGAGGCGATACGCGCACTATGCGTCAGTTTGGTATCGATGCCTGGCAGATGGAAGGCACCGACAACTACGGTAACGTCCAGTTCACGGGCTACTATACGCCCGTCGTTCAGGCTCGCCATACGCGCCAG…	ATG	TGA
SL1344_4323	GTGTGGCAAAAAAGTGCGCTGACCACAGTGTCAATTTCTCTGCCGCAACAGGCCGTTTATAGTGGCATGCGATATGAAGTTAATATCTCAGCAGCAAAATGTGACGGGACAGGCGTTACGTTCGGCACGATAAATAATTGTACAATCACCTTGAGTTTGCCCGCAGGCGCCAGTATTATAACGCGTCATTTTTCAGCCGACCTTTAA	GTG	TAA
rob	ATGGATCAGGCTGGCATAATTCGCGACCTGTTAATCTGGCTGGAAGGTCATCTGGATCAGCCGCTGTCACTTGACAATGTGGCGGCAAAAGCAGGCTATTCCAAGTGGCACCTGCAGAGAATGTTTAAGGACGTGACGGGCCACGCCATTGGCGCTTACATCCGCGCCCGTCGTTTATCGAAATCAGCAGTGGCGCTGCGTTTGACCGCGCGTCCAATTCTGGATATTGCTCTTCAGTACCGCTTCGATTCTCAGCAAACCTTTACGCGCGCCTTTAAGAAACAGTTTTCCCAGACGCCAGCGCTGTATCGCCGCTCCTCGGAATGGAGCGCCTTTGGCATTCGCCCGCCATTACGGCTGGGCGAGTTTACCGTGCCGGAACATCAGTTCGTTACGCTG…	ATG	TAA
kdpE	GTGACAAACGTTCTGATTGTTGAAGATGAACAGGCCATCCGCCGCTTTCTGCGCGCCGCGCTGGAAGGCGACGGCCTGCGCGTGTATGAAGCTGAAACATTACAACGTGGTTTACTGGAAGCCGCCACGCGAAAGCCCGATCTGATTATTCTCGATCTCGGCCTGCCGGACGGCGACGGAATCGATTTTATTCGCGACCTGCGTCAATGGAGCGCAATACCGGTGATTGTCCTTTCCGCCCGCAGCGAAGAAAGCGATAAGATTGCCGCGCTTGACGCCGGAGCTGATGATTACCTGAGCAAGCCATTCGGCATTGGCGAGCTGCAGGCGCGTTTGCGTGTCGCGCTGCGACGGCACGCCGCCAGCCCTTGCGCCGATCCGATCGTCCGCTTTTCCGGC…	GTG	TGA
trpC	ATGCAAACCGTTTTAGCGAAAATCGTCGCAGACAAGGCGATTTGGGTAGAAGCCCGCAAACAGCAACAGCCGCTGGCCAGTTTTCAAAATGAGATCCAGCCAAGTACACGCCATTTTTATGATGCGCTCCAGGGCGCGCGTACCGCCTTTATTCTGGAGTGTAAGAAAGCATCGCCATCAAAAGGCGTGATTCGCGACGATTTCGATCCGGCGCGTATTGCCAGTATTTATCAACATTACGCCTCGGCGATCTCGGTGCTCACCGACGAAAAATATTTTCAGGGGAGCTTCGATTTTCTGCCGGTCGTTAGCCAAAGCGCGCCGCAGCCGATTCTGTGTAAGGATTTTATTATCGATCCCTATCAGATCTACCTTGCCCGTTACTATCAGGCCGATGCC…	ATG	TAA
clpX	ATGACAGATAAACGCAAAGATGGCTCGGGCAAATTGTTGTACTGCTCTTTTTGCGGCAAAAGCCAGCATGAAGTGCGCAAGCTGATTGCCGGTCCATCCGTGTATATCTGCGACGAATGCGTCGATTTATGTAACGACATTATTCGCGAAGAAATTAAAGAAGTTGCTCCGCACCGTGAACGTAGTGCGCTGCCGACGCCGCATGAAATTCGTACCCACCTGGACGATTACGTTATCGGCCAGGAGCAGGCGAAAAAAGTGCTGGCGGTGGCGGTCTATAACCACTACAAGCGTCTGCGTAACGGCGATACCAGCAATGGCGTCGAGTTAGGTAAAAGCAACATTCTGCTGATTGGACCGACCGGTTCCGGTAAAACGCTGCTGGCGGAAACGCTGGCG…	ATG	TAA
SL1344_1416	GTGAGTCGTACAACTATTCTCGATGACGCCACGGCGAGCGATATCGATGAACAACGCCATTCTCAGCCGGTTCAATTTATTAAACGCGGTACAGCGCCTTTCATGCGCGTCACGCTGGCCCTTTTTTCCGCGGGCCTGGCGACTTTTGCGCTCCTTTATTGCGTTCAGCCTATACTACCGGTACTTTCCCAGGAGTTTGGCGTCTCCCCCGCCAGCAGCAGCGTTTCACTTTCTATTTCTACCGCCATGCTGGCTATCGGCTTACTTTTTACCGGCCCGCTTTCTGATGCGATAGGCCGTAAACCGGTGATGGTCACCGCCTTGTTATTAGCCTCCTGCTGCACATTGTTATCAACCATGATGACCAGCTGGCATGGTATTCTGATTATGCGCGCGCTG…	GTG	TGA
SL1344_2579	ATGAACACTCAATACCTCCAGTATGTACGTGAGCAGCTAATGGTAGCGACAGCCGATTTAAGCGGGGAGACTAAAGGGCAGCTTTTGGCCTGGCTGGAGAACGCGCAATTCGACACGAAAAACTATCCCCGAAAAAAACAGCGTATCTGGGACGAGGAAACAGAAAGCTGGATAACGTTAAATAACCCGCCAATCCCCGGCAAGCAGTCGCTGGCGAAAGGAAGCGCTATCCCGCTGGTGAAGCCTGTGGAATATTCCACTGCCTCATGGCGCCGGGCGGTTCTTTCACTCGATGAACACTACAAGGCGTGGTTGTTGTGGAATTACAGTGAGAATACCTGCTGGGAACACCAGGTCGAAATAACACAGTGGGGCTGGAGTGCGTTTGCGGCGCAACTC…	ATG	TGA
cbiL	ATGAACGGTAAATTATACGCATTAAGTACCGGGCCAGGCGCGCCCGACCTGATAACCGTCCGCGCAGCGCGGATTCTTGGCTCGCTGGACATTCTGTATGCGCCCGCCGGTCGTAAGGGGGGCGATAGTCTGGCGCTGTCGATTGTGCGCGACTATCTCGGCGAGCAGACGGAAGTACGTTGTTGCCATTTCCCTATGAGCGCTGACGGCGCCGAGAAAGAAGCGGTCTGGAACGAGGTTGCCGCCGCGCTTACCGCAGAGGTGGAAGCGGGTAAACAGGTCGGTTTTATTACCCTGGGCGATGCGATGCTATTCAGTACCTGGATTTTTTTACTCCAGCGAATCGGCTGCCCGGAGTGGCTGGAGATTGTCCCCGGCGTCACGTCCTTCGCCGCGATA…	ATG	TGA
SL1344_4467	ATGATTGTTTTTTTACGGGTGGATCATCGTTTATTACATGGACAGGTCGCCTTTTCCTGGACGCAGTACGTTGGCGCAGACTGTATTTTAATTGCCAACGACAGCGTACCTAATGATGACCTGCGTAAAACCACCATTAAGATGGCGAAGCCGCCCGCGGTGAAGCTGGTTATTAAAAATATTGCCGATTCAATTGAAGCGATAAAAAGCGGCGTTACCGATAAATATAAACTTTTTATTGTTGTTGAATCCGTGGCGGATGCGTACCGGCTGGCGCGCGAATTACCCGACATTAAAAGTATTAATTTAGGCGGCACGAAGGTACGTGAAGGGAGCCAGAATATTGCTAAAGCCATCAATCTGTTAGCGGATGAAATGACTCAACTTCGGGAGCTGGCG…	ATG	TGA
upp	ATGAAGATCGTGGAAGTCAAACACCCACTCGTCAAACACAAGCTGGGTCTGATGCGTGAAAACGACATTAGCACTAAACGCTTTCGTGAACTCGCCTCAGAAGTAGGCAGCCTGCTGACGTATGAAGCGACAGCCGACCTGGAAACGGAAAAAGTCACCATCGAAGGCTGGAATGGCCCGGTGGAAATCGACCAGATCAAAGGTAAAAAAATTACCGTTGTGCCGATTCTGCGCGCGGGTCTGGGTATGATGGAAGGCGTTCTGGAAAATGTACCGAGCGCGCGTATCAGCGTAGTCGGGATGTACCGTAACGAAGAGACGCTTGAGCCAGTACCTTATTTCCAGAAACTGGTATCGAACATTGATGAGCGCATGGCGCTGATCGTCGACCCGATGCTG…	ATG	TAA
SL1344_2734	ATGTTTCTGGTCTCCCTGGCTGAAGGCTTTATCCACCTGTTCCAGGCCGCAGGCAAAATCTTTCTCGACATGATGACCGGGCTTATCCCGATGCTCATCTGCCTGCTGCTGGCCATCAATTTCCTGATGAAGCTGGTCGGTACCGTCAGAATGGAGAAGGTCGCTGCCCTGCTCGGCCGCTCGCGCATTCTCACCTACGGCGTGTTGCCGGTGCTCGGCTGGTTCTTTATGAGCAGCCCCGGCGCGCTGACGCTCGGTAAGCTCTTACCTGAGAAGAGTAAACCCGGCTATGAAGATGCGCTCGGCACCACCGCCCATCCCCTCACCAGCCTGTTTCCCCACGTAGTGCCATCAGAGCTGTTTGTCTGGCTCGGCGTGGCTGCGGGGGTTAAGGCACTC…	ATG	TGA
SL1344_3204	ATGATTCTCTCCAGCGATAACAATGATGCGCCAAACCGCGTCATTGCTCATGAAAATAGCAGCAGCCGCCGAATCGGCCCCCTGGAGAATAAAATGAAAAAATTAGAAGATGTTGGTGTACTGATAGCGCGTATTTTAATGCCAGTTCTGTTTATTACCGCAGGATGGGGAAAAATTAGCGGCTATGCGGGCACACAGCAGTATATGGAAGCGATGGGCGTACCAGGATTCCTGCTGCCGCTCACCATACTGCTTGAGTTCGGCGGCGGTCTGGCGATTCTGCTGGGGTTCCTCACCCGCACCACTGCGCTTTTCACCGCTGGTTTTACGTTGCTGACGGCATTGATCTTCCATAGCAATTTTGCAGAAGGTGTAAACTCGCTGATGTTTATGAAAAAC…	ATG	TAA
sigD	ATGCAAATACAGAGCTTCTATCACTCAGCTTCACTAAAAACCCAGGAGGCTTTTAAAAGCCTACAAAAAACCTTATACAACGGAATGCAGATTCTCTCAGGCCAGGGCAAAGCGCCGGCTAAAGCGCCCGACGCTCGCCCGGAAATTATTGTCCTGCGAGAACCCGGCGCGACATGGGGGAATTATCTACAGCATCAGAAGGCGTCTAACCACTCGCTGCATAACCTCTATAACTTACAGCGCGATCTTCTTACCGTCGCGGCAACCGTTCTGGGTAAACAAGACCCGGTTCTAACGTCAATGGCAAACCAAATGGAGTTAGCCAAAGTTAAAGCGGACCGGCCAGCAACAAAACAAGAAGAAGCCGCGGCAAAAGCATTGAAGAAAAATCTTATCGAA…	ATG	TGA
napC	ATGGAAAATTCTAACCGTAAACCCGGCTGGATAAAGCGCGTCTGGCGATGGTGGCGCAGCCCCAGCCGCCTGGCGTTGGGGACGCTGCTGTTAATCGGTTTTATCGGCGGCATCATCTTCTGGGGCGGCTTCAATACCGGAATGGAAAAGGCTAACACCGAAGAGTTTTGTATTAGCTGCCATGAAATGCGCAACACGGTGTATGAGGAGTATATGGAAACCGTCCACTACAACAACCGTAGCGGCGTTCGTGCCACCTGTCCTGACTGCCATGTGCCGCATGAGTGGGGGCCGAAGATGATCCGTAAGATCAAAGCCAGTAAAGAGCTGTATGCGAAGGTATTTGGGCTGATAGATACACCGCAGAAATTTGAAGCTCATCGCCTGACAATGGCACAA…	ATG	TGA
hemN	ATGTCTGAACAGCAAATAGACTGGGATCTGGCCCTGATCCAGAAATATAACTATTCCGGGCCACGATATACCTCGTACCCAACCGCGCTGGAGTTTTCTGAAGACTTCGAGGACGCCGCATTCTTGCAGGCTGTGGCGCGTTATCCTGAACGTCCGCTCTCGCTGTATGTGCATATCCCGTTTTGTCACAAGTTGTGTTATTTCTGCGGCTGCAACAAGATTGTCACCCGCCAACAGCATAAAGCTGACCAGTATCTTGACGCGCTTGAGCAGGAAATTCGTCATCGCGCGCCGCTGTTTGCAGACCGTCATGTCAGCCAGCTTCACTGGGGCGGCGGTACGCCTACTTACCTGAATAAAGCGCAAATCAGCCGCTTAATGACGCTGTTGCGTGAAAAT…	ATG	TAG
SL1344_2967	ATGTCAGTGGTGATAAGTGATGCCTGGCGCCAACGCTTTGGCGGCACCGCGCGTCTGTACGGTGAAAAAGCGCTGCAGCGGTTTGCTGAGGCGCATATCTGCGTCGTAGGAATCGGCGGGGTGGGATCATGGGCGGCAGAGGCGCTGGCGCGTACGGGCATCGGCGCGATTACGCTGATTGATATGGACGATGTCTGCGTGACCAATACGAACCGTCAGATCCATGCGTTGCGTGATAACGTCGGGTTGGCGAAAGCGGAAGTGATGGCCGAACGGATTCGGCAAATTAACCCGGAGTGCCGGGTAACGGTTATCGATGATTTCATCACGCCGGATAATGTGGCGGGTTATATGAACGCGGGTTTTACCTATGTCATTGACGCTATTGACAGCGTTCGT…	ATG	TAA
SL1344_4322	ATGCGAGCCCGGATAATGTTATTTCTGGCTGCGCTTTTGCCTGGCATAACGGCAACGGCAGCCGTCGAGTTAAATAATCATCAGGCCAGAAATATGGATGATGTGCGCAGCTTAGGCGTAATCTACATCAACCATAACTTCGCCACGGAAAGTGAAGCCAATCTGGCGCTGAATGAAGAGGCCGACGTGCGAAACGCAATGTATTATCACGTCATACTTATCCGGGAACCGGGTAGCAACGGCAATATACACGCCAGCGCGAATATTTATCGCTAG	ATG	TAG
speF	ATGTCAGAATTAAAAATTGCCGTTAGCCGTCATTGCCCGGATTGTTTTTCTACACACCGTAATATTGTAAATGTTGATGAGAGTCGTTTCATCGACGTGGCTGCCATCGTGTTATCCATTGACGACATTGAACACGGAAAACTCGATGAAATCGACGCAACGGGTTACGGTATTCCCGTGTTTGTCGCGACACATGACGAAGGGCGCGTACCGCCTGAGTATTTGCCGCGTATCTCTGGTGTATTCGAATATAATGAATCCCGTACTGCCTTCTATGGTCGCCAGTTGGAAACCGCAGCAAGCCACTACGAAACGCAGTTACGTCCGCCGTTTTTCCGCGCGCTGGTGGATTATGTCAACCAGGGCAACAGCGCATTTGACTGCCCGGGGCATCAGGGC…	ATG	TGA
SL1344_4151	ATGGAAACATTATCTGTTATACATACCGTGGCGAATAGACTACGTGAATTAAACCCTGATATGGATATACATATTTCATCAACCGATGCGAAAGTATATATCCCAACAGGACAGCAGGTAACGGTATTAATTCACTACTGCGGTTCGGTTTTTGCCGAACCAGAAAATACGGATGCCACGGTACAAAAACAACTAATCCGGATTTCCGCCACCGTTATTGTTCCGCAAATAAGTGACGCGATAAACGCGCTGGATCGTCTACGTCGCTCGTTGGGGGGCATTGAACTTCCCGACTGTGATCGTCCGCTCTGGCTGGAAAGCGAAAAATATATCGGCGACGCCGCAAACTTCTGCCGTTACGCCCTGGATATGACCGCCAGCACCCTGTTTATCGCGGAA…	ATG	TGA
trpD	ATGGCTGATATTCTGCTGCTCGATAACATCGACTCGTTTACCTGGAACCTGGCAGATCAGCTACGGACCAACGGTCATAACGTGGTGATTTACCGTAACCATATTCCGGCGCAGACGCTTATCGATCGCCTGGCGACAATGAAAAATCCGGTGCTAATGCTCTCCCCCGGTCCGGGCGTTCCCAGCGAGGCAGGCTGTATGCCGGAGCTGCTGACCCGACTACGCGGCAAGTTACCGATCATCGGCATTTGTCTGGGGCATCAGGCGATTGTCGAAGCTTACGGCGGTTATGTCGGTCAGGCGGGAGAAATCCTGCATGGCAAAGCCTCCAGCATTGAGCATGACGGTCAGGCGATGTTCGCCGGGCTGGCGAATCCGCTACCGGTCGCGCGTTATCAT…	ATG	TAA
clpP	ATGTCATACAGCGGAGAACGAGATAATTTGGCCCCTCATATGGCGCTGGTGCCGATGGTCATTGAACAGACCTCACGCGGTGAGCGCTCTTTTGATATCTATTCTCGTCTACTTAAGGAACGCGTCATATTTCTGACCGGCCAGGTCGAAGACCATATGGCTAACCTGATCGTGGCGCAGATGCTGTTCCTGGAAGCGGAAAACCCGGAAAAAGATATCTATCTGTACATTAATTCTCCTGGCGGCGTAATTACTGCGGGGATGTCCATCTATGACACCATGCAGTTTATTAAGCCAGACGTCAGCACCATTTGTATGGGACAGGCGGCCTCTATGGGGGCGTTTCTGCTGACTGCCGGGGCGAAAGGCAAACGTTTCTGCTTGCCGAACTCTCGCGTC…	ATG	TGA
asr	GTGGGGTTGAATGAAAACCAAATCGAGGGTATCAAAATGAAAAAAGTATTAGCTCTGGTTGTTGCCGCTGCAATGGGTCTCTCTTCCGCAGCATTCGCGGCTGAGACTGCAACGCCTGCGAAAACCGCAGCGCCTGCCAAAACAACCCAGACCACCCAGCACCACAAAAAACAGCATAAGAAAACCGTTGAGCAAAAAGCGCAGGCGGCTAAAAAGCACCAGAAAAAAGGTGGTAAAGCGCCAGCCAAAACCACGTCAAAACCAACTACTCAACCGGCTGCGTAA	GTG	TAA
yadS	ATGCTCGTCTATTGGCTGGATATTGTAGGCACGGCTGTATTTGCTATCTCTGGCGTGTTGCTGGCCGGGAAATTACGTATGGACCCGTTCGGCGTCCTGGTGCTCGGCGTCGTTACTGCCGTCGGCGGCGGGACAATCCGCGATATGGCGCTGGATAACGGCCCGGTATTCTGGGTTAAAGATCCTACCGACCTGGTCGTCGCCATGGTCACCAGTATGCTGACCATCCTACTGGTTCGCCAGCCAAGACGTCTACCGAAATGGATGTTGCCGGTACTGGATGCGGTCGGGCTGGCGGTGTTTGTCGGCATTGGGGTGAATAAAGCCTTCCTCGCTGAAACGGGGCCATTAGTGGCTGTCTGTATGGGCGTGATTACCGGCGTCGGCGGCGGGATTATT…	ATG	TGA
SL1344_2578	ATGACCACTCAAATCTCTGTCGAAACTCTTTCCCCGATTACCCATAACCAAATTCCCGTTATTACTACCGAACTTTTGGCGCACTTATACGGCACAAAAATCAAAAACATTTCTGATAACTTTCTGAACAACACCACGCGATTCGTTGTAGGAAAGCATTTTTTTAAAATTGAAAAAAACGAATTACGCGAGTTCAAGAACAGACCCGAAACAATCGGGTTAGTTGGTAAAAATGCCCGTTCCCTAATCCTCTGGACAGAACGCGGCGCTGCCCGCCACGCCAAGATGCTCGAAACAGATCAGGCTTGGGAGGTGTTCGAAAAACTGGAGGATTGCTATTTCAGTCAGACACTACCATCGCCAACACGCCAGGTTCAGCCTGCCGTCGACATGCTTAAC…	ATG	TGA
pagC	GTGGGGTATGCACAAAGTAAAGTTCAGGATTTCAAAAATATCCGAGGGGTAAATGTGAAATACCGTTATGAGGATGACTCTCCGGTAAGTTTTATTTCCTCGCTAAGTTACTTATATGGAGACAGACAGGCTTCCGGGTCTGTTGAGCCTGAAGGTATTCATTACCATGACAAGTTTGAGGTGAAGTACGGTTCTTTAATGGTTGGGCCAGCCTATCGATTGTCTGACAATTTTTCGTTATACGCGCTGGCGGGTGTCGGCACGGTAAAGGCGACATTTAAAGAACATTCCACTCAGGATGGCGATTCTTTTTCTAACAAAATTTCCTCAAGGAAAACGGGATTTGCCTGGGGCGCGGGTGTACAGATGAATCCGCTGGAGAATATCGTCGTCGATGTT…	GTG	TGA
SL1344_3203	GTGAGCAGCAAAGGCGAACGCGAAAAACGTAAAGCGCTGCTTCTCAGTCAGATCCAGCAGCAACGGCTGGATCTGTCCGCCAGCCGTCGCGACTGGCTGGAGACCACCGGCGCGTACGATCGCGGCTGGAATACGGTGTTAAGCCTGCGCTCCTGGGCGCTGGTCGGTAGCAGCGTAATGGCCATCTGGACCATCCGTCATCCTAATATGTTGGTACGCTGGGCGAAACGCGGCCTGGGTATCTGGAGCGCCTGGCGCCTGGTAAAAACTACCCTCCGTCAACAACAGCTCCGCGGTTAA	GTG	TAA
pipC	ATGGAAAGTCTATTAAATCGTTTATATGACGCGTTAGGCCTGGATGCGCCAGAAGATGAGCCACTGCTTATCATTGATGATGGGATACAGGTTTATTTTAATGAATCCGATCATACACTGGAAATGTGCTGTCCCTTTATGCCATTGCCTGACGACATCCTGACTTTGCAGCATTTTTTACGTCTGAACTACACCAGCGCCGTCACTATCGGCGCTGACGCAGACAATACTGCTTTAGTGGCGCTTTATCGCTTGCCGCAAACCAGTACCGAAGAAGAGGCGCTCACTGGTTTTGAATTATTCATTTCAAACGTGAAGCAATTGAAAGAGCATTATGCATAA	ATG	TAA
ccmA2	ATGCTTGAAGCCAGAGATCTGTACTGCGAGCGGGACGAGAGGACGCTGTTTCGCGGGCTGTCGTTCACCGTGGAGGCCGGGGAGTGGGTGCAGGTCACCGGCGGCAACGGCGCCGGAAAAACCACCCTGCTGCGCCTGCTGACCGGGCTGGCGCGCCCGGACGGCGGGGAGGTGTACTGGCAGGGCGAACCCCTGCGCCGCGTGCGCGACAGCTTCCATCGCAGTCTGCTGTGGATAGGGCACCAGCCGGGGATCAAAACCCGCCTGACGGCGCGGGAGAACCTGCACTTCTTCCACCCCGGCGACGGCGCGCGTCTCCCGGAGGCGCTGGCGCAGGCCGGGCTGGCGGGATTTGAGGACGTGCCGGTCGCTCAGCTCTCGGCCGGGCAGCAGCGCCGG…	ATG	TGA
SL1344_3950	ATGAAAAAACCAACCTCTGCACCGCGCAGTAAAGCCTTTGGCAAACAGCGTCGTAAAACGCGTGAAGAGTTAAACCAGGAGGCGCGCGACCGTAAACGCCTGAAAAAACATCGCGGTCATGCGCCGGGAAGTCGCGCGGCGGGCGGCAATTCCGCTTCGGGCGGCGGCAATCAGAATCAACAAAAAGATCCACGTATTGGCAGTAAAACACCTGTTCCATTGGGCGTGACTGAAAAAGTGACCCAACAGCATAAACCGAAAAGTGAGAAACCTATGCTTTCACCGCAGGCGGAGTTGGATTTACTGGAAACGGATGAGCGCCTGGATGCGCTGTTAGAACGTCTGGAAGCGGGCGAAACCCTGAGTGCGGAAGATCAAGCCTGGGTAGATGCCAAACTG…	ATG	TAA
SL1344_2966	GTGGAAAAATATCTGCGTAGCGGTACCATGTTTGTGGTACTGGCATTTATATTATGGGGGTTAACACCTTTATATTATCAATATTTATCAGGGGGGAATCTCGCACAAATATTGATATACCGGGTGTTCTGGTCAATTCCATTATTACTGGCAGTAAGATTGTTATTTCGGCAGCGAACGCGATTTCATGATGCCTGGAAAGATAAAAAATCTTTTTTCTTCTGCATGATCGCCGGACTTTTGATGATTGTCTCATGGTCATCTTTTATTTATGCGCTAACCCATCATCTGGTGCTTGATGCCAGCCTCGGCTATTTTATCAACCCGCTATTTGTTATTGCGCTGGGATGCATTTTTCTTAAAGAAAAACTGTCGTTGTTTCAGGCCATCGCCGTTTTT…	GTG	TAA
sgaE	ATGCAAAAGCTCAAGCAGCAGGTATTTGACGCTAACATGGATTTGCCCCGTTATGGGCTGGTGACCTTTACCTGGGGCAACGTCAGCGCTATCGATCGCGAACGCGGGCTGGTGGTGATTAAGCCAAGCGGTGTCGCCTATGAAACCATGAAGGTAGATGACATGGTGGTGGTGGATATGGATGGCAAAGTGGTGGAGGGACGTTATCGTCCTTCTTCCGATACCGCTACCCATCTGGCGCTGTATCAACGCTATCCGTCGCTTGGCGGCGTCGTTCATACCCACTCCACCCACGCCACGGCATGGGCGCAGGCGGGGATGGCTATTCCAGCGCTCGGCACCACGCACGCGGACTATTTCTTTGGCGATATTCCTTGTACCAGAGCGTTAAGCGAAGAA…	ATG	TGA
gpmB	ATGTTACAGGTATACCTTGTTCGCCACGGTGAAACGCAGTGGAACGCCGAGCGACGTATTCAGGGCCAATCGGACAGTCCCCTGACAGCAAAAGGCGAGCAGCAGGCCATGCAGGTAGGAGAACGCGCCCGTAGCCTCGGCATCACCCATATCATCAGCAGCGATTTAGGCCGCACAAAACGCACGGCGGAGATTATCGCCCAGGCGTGCGGGTGTGATATCACCTTTGACTCCCGCCTGCGCGAGCTGGATATGGGCGTGCTGGAAAAGCGCCAGATCGATTCGCTGACGGAAGAAGAAGAGGGCTGGCGTCGTCAGCTGGTCAACGGCACGCAGGATGGCCGCATTCCCGGCGGGGAATCGATGCAGGAGTTGAGCGATCGCGTTCATGCCGCGCTG…	ATG	TAA
potE	ATGAGTAAACCTAAATCCAATAAAATGGGTGTCGTGCAGCTCACAATTCTGACTATGGTCAACATGATGGGCTCCGGGATCATCATGCTACCGACCAAACTGTCTGAAGTCGGCACGATATCCATTATCTCCTGGCTGGTCACCGCCGTCGGCTCGATGGCACTGGCCTGGGCGTTTGCGAAATGCGGTATGTTTAGCCGTAAATCCGGCGGCATGGGCGGTTACGCCGAATATGCCTTCGGTAAATCCGGCAACTTTATGGCGAACTATACCTACGGCGTCTCGCTGCTGATCGCCAACGTGGCTATCGCCATCTCCGCTGTCGGCTATGGTACCGAACTGTTCGGCGCCGCGCTGACGCCGCTCCAGATCGGTCTGGCGACTATCGCCGTATTGTGG…	ATG	TGA
trpE	ATGCAAACACCAAAACCCACGCTCGAACTGTTGACCTGCGATGCCGCCTATCGGGAAAACCCAACGGCGCTTTTTCACCAGGTCTGCGGCGATCGCCCGGCAACGCTGCTGCTGGAATCCGCGGATATCGACAGTAAAGATGATTTAAAAAGCCTGCTGCTGGTAGATAGCGCGCTGCGCATTACCGCTTTAGGTGACACTGTCACCATTCAGGCGTTATCTGATAATGGCGCCTCGTTATTGCCGCTACTGGATACCGCCCTGCCCGCTGGCGTGGAGAACGATGTCCTGCCTGCCGGTCGCGTTCTACGCTTCCCGCCCGTCAGCCCATTATTAGATGAAGACGCCCGTTTATGCTCTCTGTCGGTATTTGATGCGTTCCGTCTGTTACAGGGAGTG…	ATG	TGA
tig	ATGCAAGTTTCAGTTGAAACCACTCAGGGCCTTGGCCGCCGTGTAACGATTACAATCGCTGCTGACAGCATCGAGACCGCTGTAAAAAGCGAGCTGGTCAACGTAGCGAAAAAAGTACGTATTGACGGCTTCCGTAAAGGCAAAGTACCGATGAATATCGTCGCTCAGCGTTATGGCGCTTCTGTTCGCCAGGACGTGCTGGGCGATCTGATGAGCCGCAACTTCGTTGACGCGATCATCAAAGAAAAAATTAACCCGGCAGGCGCGCCGAACTATGTTCCGGGCGAATACAAAGTGGGTGAAGACTTCACTTACTCCGTCGAGTTTGAAGTCTATCCGGAAGTTGAGCTGACCGGCCTCGAGTCCATCGAAGTTGAAAAGCCGGTTGTTGAAGTCACC…	ATG	TAA
SL1344_1414	ATGCATAAAACCATTGCTGTATTACTGGGCATAGTGTGTTTTTTACCGGTTATGGCGAAAGCCGGGGGGGCTGAAACAGACGCCACGGATGCCAGCGACGTTAAAACGCTTTTTTTTAACCATGATGATCGGGTGCCCGTCGCCGATCCTACCCAATCGCCGTGGGATGCCATCGGGCAACTAGAGACCGCCAGCGGTAATTTGTGTACGGCAACGCTTATCTCCCCGCATATCGCCCTGACAGCAGGTCACTGCCTGCTAACGCCACCGAAAGGAAAACCAGACAAGGCGGTTGCGCTGCGTTTTGTGGCGCGAAAAGGAGTATGGCGCTATGAAATCCACGGCATTGAAGGCCGCGTTGAACCGTCGCTGGGCCGACGCCTGAAAGCGGATGGCGAT…	ATG	TAA
SL1344_2577	ATGCCAGCAGGAATTAAACCAATATTTATCAATAATATGATGTCAATATATGGATTATCCCATCCTCATGACAGCAAGGTATTTCCAGACCTTCCAGAACACCAAGATAATCCTTCGCAATTACGCCTCCAACATGATGGTCTTGCTACCGATGATAAAGCCAGGCTGGAACCAATGTGTCTTGCTGAATACCTTATCTCTGGACCAGGAGGAATGGACCCTGATATCGAAATTGATGATGATACCTATGATGAATGCCGTGAGGTACTATCACGCATACTTGAAGATGCATACACTCAAAGCGGGACATTCCGCAGACTGATGAATTATGCCTACGACCAGGAATTGCATGATGTAGAACAACGCTGGTTGCTGGGAGCCGGAGAAAACTTTGGTACT…	ATG	TGA
cbiM	ATGAAACTTGAACAGCAGCTTCGACAGTTGTCTTTCAGTGGACTGGCTGCAGCGCTATTGCTGATGGTTGTCCCGCAACAGGCGTTTGCGATGCATATCATGGAGGGCTTTTTACCGCCAGTGTGGGCGCTGGCCTGGTGGCTACTGTTTTTACCCTGCTTGTGGTATGGACTGGTGCGCTTACGGCGTATTGTGCAGGAGGATAATCATCAGAAGGTACTGCTGGCGCTGTGCGGCGCGTTTATTTTTGTCCTGTCCGCGCTCAAAATTCCGTCGGTAACGGGGAGTTGTTCACATCCGACCGGCGTTGGTCTGGCGGTTATCTTGTTCGGGCCCGGGGTGGTGGCGATTCTCGGCGCGGTTGTGCTGTTGTTTCAGGCGCTATTGCTGGCGCACGGT…	ATG	TAA
SL1344_4466	ATGAAGAGACATTATATTTTCGCCAGCCACGGCACGCTGGCCAGCGGAGTTTTAAACTCCGTGGAGCTGATTTTAGGCAAACGGTCAAATGTCTGGACGCTGTGCGCTTACGTTGAAGAGAGCGTGGATTTAAGCCAGCAGGTAGATACGCTAATTGCCCGGATCCCGCCGGAAGATGAAATTATTGCGCTGACCGATATTTTTGCCGGCAGCGTGAATAACGAATTTGTCCGTTATTTATCACGGGAAAATTTTCATCTGCTGGCAGGGATTAACCTGCCGCTGGTTATCGATCTCTTTATGTCGGAAAACGATGGCAATACCACGCATACCATAATGACGGCGTTAGCGGATTCAAAAGAAAATATTCAGTACTGCAATCAAACTATCACCAGCGCC…	ATG	TAA
SL1344_2459	ATGTCATCCTGGGTTGAGGTATCTCTGAACACACCGGCACAGCTCTCTTTGCCACTTTATCTTCCTGACGACGAAACTTTCGCAAGTTTCTGGCCGGGGGATAACGCCTCTCTACTGGCCGCGTTACAAAACGTGTTGCGCCAGGAACATAGTGGATATATCTACCTTTGGGCGCGTGAAGGCGCGGGCCGCAGCCATTTACTGCACGCCGCCTGTGCTGAACTGTCGCAGCGTGGAGATGCGGTAGGCTACGTCCCGCTCGATAAACGTACCTGGTTCGTGCCGGAAGTGCTCGACGGTATGGAACACCTCTCGCTGGTGTGTATTGATAACATTGAGTGTGTCGCTGGCGATGAACTGTGGGAGATGGCGATCTTTGATCTCTATAACCGCATTCTG…	ATG	TAA
SL1344_2733	ATGAAAAAGTCAACAACCAAAGACTGGCACCCCGCCGACATCGTTGCCGCCTTACACAAGCGCGGTACCAGTCTGGCGAAGCTGTCGCGGGAAGCGGGACTGGCCTCGTCAACATTGTCGAATACCCTGACGCGCCCGTGGCCGAAAGGCGAGTGGCTGATTGCCATCGCGCTCGACATGCATCCATCAGAAATCTGGCCCGGCCGTTACCTCAATTCCAGTAACAAACGTGAACCCCGAAAACCGCTTCACCCGATGACAACAACCGACAACTCCGGGACATAA	ATG	TAA
SL1344_3202	ATGGCGGACTCTCGACAGGCACAAGGACCAGGCAAAAGCGTACTGGGTATCGGGCAGCGGATTGTCACCATTATCGTTGAGATGGTGGAAACCCGGCTGCGACTGGCGGTAGTAGAACTGGAAGAAGAGAAAGCGAACCTCTTTCAGCTTTTGCTGATGGTAGGTCTTACCATGCTCTTCGCGGCGTTTGGCTTAATGAGCCTGATGGTTCTGGTCATCTGGGCTATCGATCCTCAGTACCGTTTGAACGCGATGATCGCTACCACAGTTGTGCTGTTAGTGCTTGCGCTAATCGGCGGCATCTGGACTTTGCGCAAAGCGCGTCAGTCCACGCTATTGCGCCATACGCGGCACGAACTGGCTAACGATCGGCAAATTCTGGAGGACGATCAGTCGTGA	ATG	TGA
SL1344_1028	TTGCTATTGACTTCCTTCATTTCCAGCATAGCTTACGCTTCATCATCATTGAATAAACAATTAAGTTTGTTGAGCGAAAATTTACTTAAAGAAAAAATAATAAGCACCAATATTTTTTGCAGTATTTCAACTTATACCAGAATAAATGCGCGTAGATGGCGTAAAAACCTGATGAGCAGGAATACTTACACACTAAAAATGCTCCCGCAAACAGAGCAAAATGAGAGAGATGAACGTTTGCCCCTTACATTTCCACCAAAGATTCTGGTCTTGTCTCTTGTAAAGGGCATACGTATCGCGTTTTATCTCATTAAGAAAGTATGTTGA	TTG	TGA
ccmB2	ATGTGGCGTGTCTTCTGTCTCGAACTGCGCGTGGCGTTCCGCCACGGCGCGGACATCGCCGGCCCGCTGTGGTTCTTCCTGATGGTCATCACCCTGTTTCCGTTAAGCGTCGGGCCGCAGCCGCAGCTGCTGGCGCGTATCGCGCCGGGCATCATCCAGGTGGCGGCGCTGCTGGCCTCGCTGCTGGCGCTGGAGCGGCTGTTTCGCGACGACCTGCAGGACGGCAGCCTGGAGCAGCTGATGCTGCTGCCGGTGCCGCTGCCGGCGGTGGTGCTGGCGAAGGTGCTGGCCCACTGGGCGGTGACCGGCCTGCCGCTGATTATGCTCTCCCCGCTGGTGGCGCTGCTGCTGGGGATGGACGTGTACGGCTGGAAAATCATGGCGCTGACGCTGCTGCTC…	ATG	TAG
SL1344_3948	GTGATGAGTGCGCCTGATATTCGCCATTTACCTTCCGATTGCGGAATTGAAGTGGCTTTTGCTGGCCGTTCCAATGCAGGCAAATCCAGCGCCCTGAACACGTTGACCAACCAAAAAAGCCTGGCGCGCACCTCTAAAACGCCGGGCCGTACCCAATTGATTAACCTGTTTGAAGTCGTAGATGGCAAACGGTTGGTCGACCTGCCGGGCTATGGCTACGCGGAAGTCCCGGAAGAGATGAAACGCAAGTGGCAACGCGCGCTGGGGGAATATCTGGAGAAACGTCAAAGCCTACAGGGCTTAGTCGTTTTAATGGATATCCGCCATCCGTTGAAAGACCTCGACCAACAGATGATCCAGTGGGCTGTAGAGAGCAATATCCAGGTTCTGGTTCTGCTG…	GTG	TAA
SL1344_2965	ATGACAAACCCTCTTTATACCGGACACCCGTTCGGCACAACGGTAACGGAAGAGACGTTACGCGCTATCTTTCTCCCGCTGACCCAGTGGGAGGATAAATATCGTCAGTTGATTCTGTTAGGAAAACAGCTCCCCGCTCTGCCGGATGAATGCAAAGCGCAGGCGAAAGAGATAGCCGGCTGCGAGAACCGCGTCTGGCTGGGCTTTACCCGATCAGATAACGGAACGATGCACTTTTTCGGCGACAGTGAGGGGCGGATTGTCCGCGGCCTGCTGGCGGTATTGCTCACCGCGGTGGAAGGAAAAAACGCCGCCGAGTTGCAGGCTCGTTCACCGCTGGCGCTGTTTGATGAGCTGGGTTTACGCGCCCAGCTTAGCGCCTCACGTAGTCAGGGGCTG…	ATG	TGA
sgaU	ATGCTGTCGAAACAAATTCCGCTCGGCATCTATGAAAAAGCGCTCCCTGCCGGGGAGTGCTGGCTGGAGCGCCTGCGGCTGGCGAAAACGCTGGGTTTTGACTTCGTTGAAATGTCGGTGGACGAGACCGACGCCCGACTGGCGCGGCTCGACTGGAGTCGCGAGCAGCGCCTGGCGCTGGTGAGCGCGGTTGCTGAAACCGGCGTGCGTGTGCCGTCCATGTGTCTGAGCGCGCATCGTCGTTTTCCGCTCGGTAGCGAAGATGACGCGATACGGGCGCAGGGGCTGGAGATTATGCGTAAAGCGATTCAGTTTGCGCAGGACGTCGGGATTCGCGTCATTCAACTGGCGGGGTACGACGTTTACTATCAGCAGGCCAACGACGAAACGCGTTGCCGC…	ATG	TAA
SL1344_0681	ATGAGTAATCCAGAGCGGGAAGTCACTGATATAGCAGAAATACTGGCTATTCTCAGTAAACACGAAGTGTGTCGGATAGGGTTTAACGACAATCTCTGCCCGTATGTTGTCCCCGTAAATTTTGGCTACGAGTATCAGAACGGACGCTGGATATTTTATTTTCACGGCGCACGCACCGGGAAAAAGATGCGTCTGTTACGTAAGAACCCGGCAGTATGCATTGAAATGGACGGCGACCATGCATTACTACGTGCCGATGACCCCTGTGATTATAGCTACGCCTACACCAGCGTTTTCGCCACCGGACTGGCATCGATATTGCAAACGCGCGAGGAGATGCGCTACGGCCTGGACGTCATTATGCGTCAGACCGATCCGGGAAAAACCTTCAGTTATCGG…	ATG	TAA
SL1344_4150	ATGAAATATATCTACAGTGGCCCGGCAAGCGGCGTCACGCTCGCCGACGGTCAGGAAGTCTTACTGTGGCCCAATAGCGAAATCTCGCTGCCGGAAGATAACGAGTGGGTAATCACCATGATTGCCCGCCGTCACCTGGTGCCAGTGGTTACGCAAGAAGTAGAAACTAATGAAGAGGAAATTGTCCATGGCAGCTAA	ATG	TAA
trpH	ATGGGAGCCGCCTTGAGCGACACGAATTACGCAGTGATTTACGATCTGCACAGTCATACCACGGCGTCCGATGGACTGTTGACGCCAGAAACATTAGTACACCGTGCGGTAGAGATGCGAGTCGGCACGCTGGCGATTACCGATCATGACACCACAGCCGCGATTCCTGCGGCAAGAGAAGAAATTTCACGTTCCGGACTGGCCCTGAATCTTATTCCCGGCGTGGAGATTTCAACGGTCTGGGAGAATCATGAGATTCACATTGTGGGTCTGAATATTGATATTGCGCATCCGGCAATGCGCGATTTTCTGGCGCAGCAGACAGAGCGGCGTCAGGCACGCGGTCGGCTCATTGCGGAGCGTCTGGAAAAAGCCCATATTCCCGGCGCGTGGGAAGGG…	ATG	TGA
bolA	ATGATGATACGTGAGCAAATAGAAGAAAAATTAAGGACAGCGTTCGACCCCGTGTTTCTCGAAGTTGTGGATGAAAGCTATCGTCACAATGTTCCAGCAGGATCGGAAAGCCATTTTAAGGTCGTGCTGGTGAGCGATCGCTTTACAGGCGAACGTTTTCTTAATCGTCATCGGATGATTTACGGTACGTTAACGGCGGAACTTTCCACAACCGTACATGCGCTGGCACTGCATACTTATACCCTCAAAGAGTGGGAAGGATTGCAGGATACTATCTTCGCGTCGCCTCCTTGTCGCGGCGCGGGAAGCATCGCGTAG	ATG	TAG
SL1344_3551	ATGACGTCGCTGACGCTGGTGCCTGTTCCTCCCGTGGCGCAGCTTGAGGGGGTGAGCCAGCATTACGGAAAAACGGTCGCGCTGAACAATATCACGCTGGACATTCCCGCCCGTAGTATGGTCGGGCTGATTGGTCCGGACGGGGTGGGTAAGTCGAGCCTGCTGTCGCTGATTTCTGGCGCGCGGGTGATTGAGCAAGGGAACGTTATCGTCCTGGGCGGCGATATGCGCGATGCGAAACATCGCCGCGACGTCTGTCCGCGCATCGCCTGGATGCCGCAGGGGCTGGGGAAAAACCTTTATCACACGTTATCGGTTTATGAGAACGTCGATTTTTTCGCTCGTCTCTTTGGTCATGACAAAGCTGAACGCGAAGCGCGTATTACCGAGCTGCTGAAC…	ATG	TAA
SL1344_1413	GTGCAACAATTTGAATGGATACACGGCGCCTGGCTTGGGCTGGCAATAATGCTGGAAATCGCGGCTAACGTTCTGTTGAAATTTTCGGACGGCTTTCGCCGTAAATGCTATGGCATCTTATCGCTTGCCGCTGTTCTGGCCGCCTTCAGCGCGCTTTCCCAGGCGGTAAAAGGGATAGACCTGTCGGTGGCGTATGCGCTATGGGGCGGTTTTGGTATTGCCGCTACGCTGGCGGCGGGCTGGGTGCTCTTCGGCCAGCGCTTAAATCCCAAAGGCTGGGTTGGCGTGATATTGCTGCTCGCCGGAATGGTCATGATCAAATTTGCCTGA	GTG	TGA
SL1344_0205	ATGAGTGATGACGTAGCGCTGCCGCTGCAGTTTACCGACGCAGCAGCGAATAAAGTAAAAAGTCTTATCGCTGACGAAGATAACCCGAATCTGAAACTGCGCGTGTATATCACCGGCGGTGGTTGCAGCGGCTTCCAGTATGGTTTTACCTTTGACGATCAGGTGAACGAAGGGGATATGACCATCGAAAAACAGGGCGTTGGCCTGGTGGTTGACCCGATGAGTTTGCAGTATCTGGTGGGTGGTTCGGTAGATTATACCGAAGGTCTGGAAGGTTCCCGCTTCATTGTAACCAACCCGAATGCGAAAAGTACCTGCGGGTGTGGCTCTTCCTTCAGCATTTGA	ATG	TGA
SL1344_2576	ATGATGAGAATCAGTGAAAAAGGCATTACCCTAATCAAAGAGTTTGAAGGTTGTAGCCTGAAAGCTTATCCGGACCCGGGAACGGGGGGAGATCCCTGGACGATTGGTTATGGCTGGACCCACTCTGTTGACGGTAAGCCAGTTAAGCCCGGAATGATGATTGACGAGGCTACTGCCGAGCGCTTGCTTAAAACTGGTTTAGTCGGTTATGAAAATGATGTGTCCAGACTGGTTAAGGTCAAGTTGACGCAAGGCCAGTTTGATGCGCTGGTGTCGTTCGCGTACAACCTCGGCGCCCGGACATTATCCACATCAACTCTGCTGCGGAAGCTAAACGCTGGTGATTACGCTGGCGCCGCTGATGAGTTCCTGCGCTGGAATAAGGCTGGTGGCAAGGTA…	ATG	TGA
pagD	ATGAAACATCATGCTTTTATGCTTTGGTCATTACTTATTTTTTCATTCCATGTTTTGGCCAGTTCAGGCCATTGTTCTGGTTTACAACAGGCATCATGGGATATTTTTATCTACGATTTTGGTAGTAAAACCCCGCAACCACCTACAAATACTGATAAAAAGCAAGCCAGGCAGATTAGTTCACCGTCCTGCCCGACGACAAAACCCATGATGTCCGCACCAGTCAATGACGCCAGGAAAGGGAATACTTTCTCCAGAACATAA	ATG	TAA
rtcB	ATGATGAATTACGAATTAATGACCACCCAGAACGCACCGGTAAAAATGTGGACCAAAGGCGTACCGGTAGAAGACGATGCCCGTCAGCAGCTGATCAATACGGCGAAAATGCCGTTTATTTTCAAACATATTGCCGTTATGCCGGATGTGCATTTGGGGAAAGGATCGACCATCGGTAGCGTGATCCCGACGAAAGGGGCGATTATTCCGGCGGCGGTGGGCGTGGATATCGGTTGTGGAATGAACGCGCTGCGTACCAGCTTAACGGCGGCCGATCTGCCGGAAAATCTGGCGGATCTGCGTAGCGCCATAGAGGCCGCTGTGCCTCACGGGCGTACCACCGGACGCGGGCATCGCGATGTGGGCGCATGGGGAAACCCGCCCGCCAACGTTAATGAA…	ATG	TAG
SL1344_2458	ATGACCGACACGATTAAAATCTACCATAACCCGCGCTGCTCGAAGAGCCGCGACACGCTGAACCTGCTGAAATCTAACGGCGTGGAACCGGAAGTGGTGCTTTATCTGGATACGCCCGCCGATGCCGCCACCGTGCGGGAACTGCTGCGTATGTTGGGCATGTCCAGCGCGCGCGAACTGATGCGCCAGAAAGAAGATCTCTATAAAACGCTTCACCTGGCGGATAGTGAGCTGAGTGAAGAGGCGTTAATCCAGGCGCTGGTTGAACACCCTAAACTGATGGAGCGCCCCATTGTGGTGGCAAATGGTCAGGCGCGCATTGGCCGACCGCCTGAGCAGGTGCTGGACATCCTCGGTTAA	ATG	TAA
SL1344_3201	ATGAAATACCGCATCGCTTTGGCTATCACGCTTTTTACACTTAGCGCCGGTAGCTACGCTAATTCGCTTTGTCAGGAAAAAGAGCAGGATATACAAAAGGAAATTAGCTACGCTGAAAAGCACAACAATCAGCGCCGTATTGAGGGTCTGAACAAGGCGCTCAGCGAAGTACGCGCCAATTGTACTGACAGCAAGCTGCGCGCCGAGCATCAGAAAAAGATCGCTGAGCAAAAAGAAGAGGTAGCCGAACGCCAACGTGATTTAGCCGAGGCAAAAGCAAAAGGCGATGCGGATAAAATAGACAAACGTGAACGTAAGCTGGCCGAGGCTCAGGATGAGCTAAAAAAACTTGAGGCCAGAGACTACTAA	ATG	TAA
pipB	ATGCCAATAACTAACGCGTCCCCAGAAAATATATTAAGATATTTGCATGCGGCCGGTACCGGTACGAAAGAAGCAATGAAAAGTGCAACTTCACCACGCGGTATACTGGAATGGTTTGTCAATTTTTTTACCTGTGGTGGAGTAAGAAGAAGCAATGAAAGATGGTTTCGGGAGGTAATTGGAAAACTGACCACATCATTATTATATGTAAATAAAAATGCTTTCTTCGATGGTAATAAAATATTTCTGGAGGATGTCAACGGGTGTACTATATGTCTGTCATGTGGAGCAGCATCCGAAAATACGGATCCCATGGTCATTATTGAAGTGAACAAAAATGGAAAAACTGTAACGGATAAAGTTGATAGTGAGAGATTTTGGAATGTATGTCGAATGTTA…	ATG	TAG
rplB	ATGGCAGTTGTTAAATGTAAACCGACATCTCCGGGTCGTCGCCACGTCGTTAAAGTGGTCAACCCAGAGCTGCACAAGGGCAAACCTTTTGCTCCGCTGGTTGAAAAAAACAGCAAATCCGGTGGTCGTAACAACAATGGCCGTATCACCACTCGTCATATCGGTGGTGGTCACAAACAGGCTTATCGTATTGTTGACTTCAAACGCAACAAAGACGGTATCCCGGCAGTTGTTGAACGTCTTGAGTACGATCCGAACCGTTCCGCGAACATCGCGCTGGTTCTGTACAAAGACGGCGAACGCCGTTACATCCTGGCCCCGAAAGGCCTGAAAGCTGGCGACCAGATTCAGTCTGGCGTTGATGCTGCAATCAAAGCAGGCAACACCCTGCCGATGCGC…	ATG	TAA
ccmC2	GTGACGACTATGTGGAAAACCCTTCATCAGCTGGCGGCGCCGCCCCGGCTGTATCAGATTTGCGGCAGGCTCGTGCCGTGGCTGGCGGCGGCCGGCATCATTGTGCTGGCCACGGGCTGGGTCCGGGGCTTTGGTTTCGCCCCGGCGGACTACCAGCAGGGGGAGGGCTACCGCATTATGTACCTGCATGTCCCGGCGGCCATCTGGTCGATGGGTATCTATGCGGCGATGGCGGTGGCGGCGTTCACCGGGCTGGTCTGGCAGATGAAAATGGCCAGCCTTGCCGTCGCGGCGATGGCGCCGGTGGGGGCGGTGTACACCTTCATCGCGCTGGTCACCGGCGCGGCGTGGGGCAAACCGATGTGGGGCACCTGGTGGGTGTGGGACGCGCGCCTGACC…	GTG	TGA
polA	ATGGTTCAGATCCCAGAAAACCCACTTATTCTCGTAGATGGCTCATCCTATCTCTATCGCGCCTATCATGCGTTTCCGCCGTTAACCAACAGCGCGGGAGAACCTACGGGCGCAATGTATGGTGTCCTCAACATGTTGCGCAGCCTGATCATGCAGTATCAGCCGACGCATGCTGCGGTGGTGTTTGACGCCAAAGGAAAAACCTTCCGTGATGAGCTCTTTGAACACTACAAATCGCATCGTCCTCCAATGCCGGATGATCTTCGTGCGCAAATAGAGCCGTTACATGCCATGGTTAAAGCCATGGGGTTACCTCTGCTGGCGGTCTCTGGCGTAGAAGCGGATGACGTTATCGGTACACTGGCGCGAGAAGCGGAGAAGGTGGGGCGTCCGGTATTA…	ATG	TAA
SL1344_2964	ATGAACGCTTTTAATCCCACGCAGTTTCGCGCGCAGTTTCCCGCGCTAGCCGATGCGGGTGTTTATCTCGATAGCGCCGCCACGGCATTAAAGCCACAGGCAGTCATTGACGCCACGCACCAGTTTTATTGTTTGAGCGCCGGTAACGTTCATCGTAGCCAGTTTGCGCAGGCGCAGCGCCTGACGGCGCAATATGAAGCGGCCAGAGCAAAAGCAGCGCGGCTGTTAAACGCGCCCGATGAAAAAAGTATCGTCTGGACACGCGGCACCACCGAAGCGATCAACATGGTGGCGCAGTGTTACGCCCGTCCTCGTCTGCGCCCCGGCGATGAAATTATCGTTAGCGTCGCCGAGCATCACGCCAACCTTGTGCCCTGGCTGATGGTGGCGCAACAAACC…	ATG	TAA
sgaH	ATGTCATTACCAATGTTGCAGGTCGCGCTGGACAACCAGACTATGGATAGCGCCTATGAAACCACTCGCCTGATTGCCGAAGAAGTCGACATTATCGAAGTGGGCACCATTCTGTGCGTGGGCGAAGGCGTGCGTGCGGTTCGCGACCTGAAAGCGCTTTACCCGCACAAAATCGTGCTGGCGGACGCCAAAATTGCCGATGCCGGTAAAATCCTCTCCCGTATGTGTTTCGAAGCCAACGCGGACTGGGTGACCGTGATTTGCTGTGCGGATATCAACACCGCAAAAGGCGCGCTGGATGTGGCGAAAGAGTTCAACGGCGACGTGCAGATCGAACTGACCGGTTACTGGACCTGGGAACAGGCGCAGCAGTGGCGTGATGCGGGTATTCAGCAAGTG…	ATG	TAA
SL1344_4511	ATGCACCAGGTTATCTCTGCGACCACCAATCCTGCCAAAATTCAGGCAATTCTACAGGCATTTGAAGAGATTTTCGGCGAAGGATCGTGCCATATTACGCCCGTCGCCGTCGAGAGCGGCGTACCGGAGCAGCCCTTCGGAAGCGAGGAAACGCGTGCTGGCGCACGAAATCGCGTGGATAATGCGCGACGCCTGCATCCACAAGCTGATTTCTGGGTAGCCATTGAAGCCGGAATTGACGATGACGCCACCTTCAGTTGGGTGGTGATTGATAACGGCGTTCAGCGCGGTGAAGCGCGATCGGCCACGCTACCGCTGCCCGCCGTCATTCTCGACAGAGTCCGCCAGGGAGAAGCGCTTGGCCCGGTAATGTCGCAGTACACAGGTATTGATGAGATT…	ATG	TAA
pgm	ATGGCAATCCACAACCGCGCAGGACAACCCGCGCAACAGAGTGATTTGATTAACGTCGCCCAACTGACGGCGCAGTATTATGTACTGAAACCGGAGGCAGGGAATGCAGAACATGCCGTGAAATTTGGCACTTCCGGCCATCGCGGCAGCGCAGGTCGTCACAGTTTCAACGAACCGCATATTCTGGCGATCGCCCAGGCGATTGCTGAAGAGCGGGCGAAAAATGGCATTACCGGCCCCTGCTATGTGGGGAAAGACACCCATGCGCTCTCGGAACCGGCCTTCATTTCCGTGCTGGAAGTGCTGGCGGCAAACGGCGTAGACGTTATCGTGCAGGAAAATAATGGCTTTACGCCAACGCCTGCCGTGTCAAATGCTATCCTGGTCCATAACAAAAAA…	ATG	TGA
SL1344_1652	ATGAGCCAGTTTTTTTATATCCATCCGGATAACCCACAGCAACGGCTGATTAATCAGGCCGTCGACATTGTGCGTAAAGGCGGTGTTATTGTTTATCCAACCGATTCCGGCTATGCCCTTGGTTGTAAAATTGAAGACAAAGGCGCAATGGAGCGCATTTGCCGCATCCGTCATCTGCCGGACGGCCACAACTTCACGCTGATGTGCCGCGATTTGTCCGAGTTGTCGACCTACTCCTACGTCGACAACGTGGCATTTCGTCTGATGAAAAACAATACGCCGGGTAATTACACCTTTATCCTGAAGGGGACAAAAGAGGTGCCGCGCCGTCTGTTGCAGGAAAAGCGTAAAACTATCGGCCTGCGCGTACCGTCAAACCCGATTGCGTTGGCGTTATTG…	ATG	TAA
yajG	ATGATGGCGGGAATTTTTACCTATCACGTTTTAAGCGTCATTGAGAGCCTGAATATGTTAAAAAAACTTCTCTTTCCGTTAGTCGCTCTGTTTATGCTGGCAGGATGCGCCACACCGCCGACGACCATTGACGTCGCGCCGAAGATCACCTTGCCACAGCAGGACCCGAGCCTGATGGGCGTCACCGTTAGCATTACCGGCGCGGACCAACGCCAGGATCAAGCGTTAGCGAAAGTCACGCGTAACAACCAGCTGGTAACGTTAACCGCCTCCCGCGATTTACGCTTCCTGTTACAAGAAGTCCTGGAAAAACAGATGACGGCGCGGGGCTATATGATCGGGCCTAACGGCGCGGTTAATCTGCAGATAATTGTTAACCAACTGTATGCTGATGTTTCC…	ATG	TAA
SL1344_1412	ATGTTTTACTGGATTTTATTAGCTCTGGCTATCGCGACTGAAATTACCGGCACGCTCTCAATGAAATGGGCTAGTGTGGGTAATGGCAATGCGGGTTTTATTTTAATGCTGGTGATGATCACGCTGTCATATATATTTCTTTCTTTTGCGGTAAAAAAGATTGCCCTGGGTGTAGCGTATGCCTTATGGGAAGGGATCGGCATTTTATTTATTACCATTTTTAGCGTGCTGCTATTTGATGAAGCATTATCAACCATGAAGATTGCCGGCTTGCTGACGCTGGTCGCCGGCATCGTATTGATCAAATCAGGGACGCGTAAACCCGGCAAACCGGTGAAGGAGGCGACTCGTGCAACAATTTGA	ATG	TGA
SL1344_2575	ATGATGTTCAACTGGAAAACGATGTTTGTTGGCCTGTTGCTCGTCTCGCTAATTGTTGCCGGTCGGCTGGCAAATCACTACCGCAATAACGCTATCACTTACAAGTACCAGCGTGATACTGCTACTCACAACCTGAAGCTGGCGAACGAGACAATTACCGATATGACGAAGCGCCAGCGTGACGTTGCCGCCCTCGATGCAAAATACACAAAGGAACTAGCTGATGCACAAAACAGGAATACTGATTTGCAGCGCCGCCTTGCTGCTGGTAGCCGGGTGCGTGTCGAAGGACGCTGTACAGTGCCAACCACAACCACAACCAAAACCGCCAGTACCCGCCGCGTGGGCAATGCTGCCACCGTCGAACTCTCTCCAGTTGCTGGACAAAACGTTCTCGAT…	ATG	TAA
cbiN	ATGAAAAAAACGTTGATGTTGTTAGCGATGGTGGTGGCGCTGGTGATTCTGCCGTTTTTTATTAACCATGGCGGTGAATATGGCGGTTCAGACGGCGAAGCGGAAAGCCAGATTCAGGCTATTGCGCCGCAGTATAAACCCTGGTTTCAGCCGTTATATGAACCTGCCAGCGGTGAAATTGAAAGCCTGCTGTTTACCCTTCAGGGCTCTCTTGGCGCGGCGGTGATTTTTTATATCCTGGGGTATTGCAAAGGTAAACAACGCCGTGATGACCGGGCTTGA	ATG	TGA
SL1344_4465	ATGCGCAAAGATGCCCTGCTTGCTTTCCTGATGAACCAAACGGATTTTTTTGATCCGGAAAATGTCAGTGAGGTGTTTACCGCGCGCTATCTGGCGCAGCGTTTTAATATGCAGCGCAATACCGCCAGCCATTATCTGAACCAACTGGTGGCGCAGGGCGTGCTCTGCAAAATCAATACCCGTCCCGTCTATTTCCTGCATAAGCAGGCATTTAGCCAACAGTTTTTTACCCTTTCGCGTAATGAATACGCCAGCGTCGCGGAGCTGTTAGCGCACGGGGAACAGGAGTGCGCGCCGGACGATCACTTTTCCCTGTTGATTGGCCATAACGAAAGCCTGAAGCGCCCGATTGAGCAACTGAAAACCGCGCTGTTTTATCCCGACGGCGGACTGCCGCTA…	ATG	TAA
SL1344_2457	ATGTTCAGGCAGTTGAAAAAAAACCTGGTGGCAACCCTCATTGCAGCATTGGCTCTCGGTCAGGTCGCGCCCGCATTTGCCGACCCTGCCGACACGCTGCCCGATATGGGAACCTCGGCAGGAAGCACGCTTTCTATCGGACAAGAGATGCAAATGGGCGACTTTTATGTGCGCCAGCTACGCGGCAGCGCGCCGTTAATCAACGATCCGCTGCTGGTGCAATACATTAACGCGCTGGGTATGCGTCTGGTCTCGCACGCCGACTCCGTCAAAACGCCCTTCCATTTTTTCTTGATCAATAATGACGAAATCAACGCCTTCGCGTTCTTTGGCGGCAATGTGGTGCTGCACTCGGCGCTTTTTCGCTACGCGGATAACGAAAGCCAGCTAGCTTCAGTC…	ATG	TAA
SL1344_2732	ATGCCTGAAGATGGTTGCTGCCCAGAGAGGGATAATTCCTGCATGTTCAGGTGCAGGATTGCAATCGTGATTGGTAAAAGATTAAAGATTTCAAGAGTCAGGGCTGATCTGACGCAAGCGGAACTGGGTGCACTCGCTGGGCTGGATGAAGAATCCGCAAGCGCGCGTATCAGTTCGTATGAAAAGGAAGTCCATGCACCCGATTTCAAACTCGTCTGTAAGCTGGCAGCAGCGCTTGATGTACCGGAAGCGTATTTTTATGCTGTTGACGATGAGCTTGCAGAATTGATCCTCCAGTATCACCGTTTTAAGAAAAATAACCCCGGAAGTACATTGATATTGTCTGGTAATATATGA	ATG	TGA
SL1344_3200	ATGCTTAAACCACGCATAACTGCCCGACAACTCATTTGGATCAGCGCTTTTCTACTGATGCTGACCATACTCATGATGACGTGGTCAACGCTGCGTCAGCAAGAGTCGACGCTGGCCATTCGCGCGGTTAACCAGGGCGCCAGTATGCCAGACGGCTTCTCAGTTCTGCATCATCTGGATGCGAACGGCATTCATTTTAAAAGCATTACGCCTAAAAATGACATGTTGCTCATTACCTTCGATTCCCCTGCGCAAAGCGCCGCAGCAAAAACAGTGCTTGATCAAACGTTACCACACGGTTATGTCGTCGCTCAGCAGGACGATGACAACGAAACGGTACAGTGGCTGTCCCGCTTACGGGAAAGCTCACACCGCTTTGGCTAA	ATG	TAA
pipA	ATGCTTCCGGTCACCTACAGATTAATACCTCAAAGCGGAGTATCCACATATAGATTAAATACCGCAGATACACCTGTTTTCCCCGATATTCCCGAACATGCACCAAACCCCTCACGGCTACGCCTTGCTCATGACAGCCTTGCCATAAACAGTGAATTCCGTCTGGAGCCAGAGTGTGTGGTGGAGTACCTTATCTCAGGCGCGGGTGGAATAGACCCTGATACAGAAATTGATGACGACACTTATGACGAATGCTACGATGAACTATCCTCCGTACTTCAAAATGCGTATACCCAAAGCGAAACATTCCGCAGACTGATGAATTACGCATATGAAAAAGAACTACATGATGTGGAGCAGCGCTGGCTACTGGGGGCAGGCGAAGCCTTTGAAACTACC…	ATG	TAG
ccmD2	ATGGGCGGGTACGCCTTTTTTGTCTGGCTGGCGGTGGCGATGACCGTGGCGCCGCTGGCGCTGCTGGCGCTGCACACGGTGCTGCAGCGCCGGGCCATTCTGCGCGGCGTGGCGCAGCAGCGGGCGCGCGAGGCGCGGATGCGTGCCGCACAGGCGCAACAGGAGGCCGCGTGA	ATG	TGA
yihG	ATGACGAGAATACTCGCGGCTATCACGCTCCCATTGAGTATCGTATTGACCATCCTGGTCACTATTGTTTGCTCAGTACCGATCATCATTGCCGGTATGGTAAAGCTTCTTTTGCCTGTTCCCGGTATCTGGCGCAAGGTCTCCATTTTCTGCAATTTCATGATGTATTGCTGGTGTGCTGGTCTTGCAGCGCTGTTACGCCTTAATCCGCACTTGCAATGGGATGTAGAAGGGTTAGAAGGGCTGAGCAAGAAAAATTGGTATTTACTGATTTGTAATCATCGCAGCTGGGCCGATATCGTTGTGCTTTGCGTTCTGTTCCGCAAGCATATCCCAATGAATAAGTACTTTCTTAAACAGCAATTGGCCTGGGTGCCGTTCATCGGCCTGGCGTGCTGG…	ATG	TGA
SL1344_2963	ATGAAAAAGACTGCCGCAATTATCTCTGCATGTATGCTGACTTTTGCCCTGAGCGCCTGTTCCGGTCCTAATTACGTTATGCACACCAATGATGGACGTAGCATTGTGACCGACGGTAAACCCCAGACCGATAACGATACCGGTATGATTTCGTATAAAGACGCTAATGGCAACAAACAGCAGATCAATCGTACTGACGTGAAAGAGATGGTGGCTCTGGAAAACTAA	ATG	TAA
sgaA	ATGAAATTACGTGATTCACTGGCGGAGAATAATTCTATCCGCCTGCAGGCTGAAGCGAATACCTGGCAGGAAGCCGTCAAGATCGGCGTCGATTTACTGGTGGCTGCAGACGTGGTAGAGCCGCGCTATTACCAGGCGATTCTGGATGGCGTTGAGCAGTTTGGCCCCTATTTTGTGATTGCCCCCGGCCTGGCGATGCCGCATGGCCGCCCGGAAGAAGGGGTGAAGAAAACCGGTTTTTCGCTGGTGACCCTGAAAAAGCCGCTGGAGTTCAACCACGAAGATAACGACCCGGTCGATATTCTGATCACCATGGCGGCGGTTGATGCCAACACTCACCAGGAAGTGGGCATCATGCAGATCGTCAACCTGTTTGAAGACGAAGCTAATTTTGACCGT…	ATG	TAA
seqA	ATGAAAACGATTGAAGTTGATGATGAACTCTATAGCTATATTGCCAGCCACACCAAGCATATCGGCGAGAGCGCATCCGACATTTTACGGCGTATGTTGAAGTTTTCCGCCACGACACAGCCAACGGCTTCAGCGGTGAAGGGGACGCCTGCGGCGCAACCCGTTGCCGAAGCGAAACCGGTTAACCCGGTAAAAGACAAAGTTCGCGCGATGCGTGAGCTGTTGTTGTCTGACGAATATGCCGAGCAGAAAAAAGCGGTCAACCGCTTTATGCTGATTCTGACTACACTCTATTCACTGGATCACCACGCGTTTGCGGAGGCGACGGAGTCGTTGCATGGCCGCACGCGCGTCTATTTTGCGGCGGATGAACAAACGCTGCTGAAAAATGGGAATCAA…	ATG	TAA
SL1344_4149	ATGGCAGCTAATTACCTGCACGGTGTAGAGACCATTGAGATCGAAACCGGCCCACGTCCGGTTAAGGCGGTTAAATCTGCGGTTATTGGTCTGATCGGCACCGCGCCATGCGGCCCGGTTAACCAGCCAACGCTGTGCCTTTCTGAAAGCGACGCGGCACAGTTTGGCCCAGGTCTGGCAAATTTCACCATCCCGCAGGCGCTGAAGGCGATCTACGATCACGGCGCAGGGACGGTCGTGGTGATTAACGTGCTGAATCCGGCGGTACACAAAAGTACCATTCCCAGTGAAACCGTGAAGGTTGATGACAACGGTCAGATTCAACTCAAGCACGGGGCCGTGCAAACGATGAACATTGGCCGCAGCACGAACGCCGGAAACGCTTATATCAAAGGCACC…	ATG	TAA
SL1344_1651	ATGAGCGAAAAGTTACAAAAAGTGCTGGCGCGCGCTGGCCACGGCTCTCGCCGTGAAATCGAATCCATTATTGAAGCGGGACGTGTCAGCGTTGACGGTAAAATCGCCACGCTTGGCGATCGTGTTGAAGTCACTCCCGGTTTGAAAATCCGTATCGACGGTCACCTGATTTCGGTGAAAGAGTCGGCGGAACAAATTTGCCGCGTTCTGGCCTATTACAAACCAGAAGGTGAACTGTGTACCCGCAATGACCCTGAAGGGCGGCCAACCGTTTTTGATCGCTTACCGAAACTGCGCGGCGCGCGGTGGATTGCGGTAGGACGTCTGGATGTCAACACCTGCGGGCTATTGTTGTTTACCACCGACGGTGAACTGGCGAACCGCCTGATGCATCCTAGT…	ATG	TAA
ampG	ATGTCAAGTCAATATTTACGTATTTTCCAGCAACCGCGCTCAGCCATTCTGCTGATATTGGGTTTTGCCTCCGGTCTCCCGCTGGCGCTCACCTCCGGTACGCTACAGGCGTGGATGACCGTCGAGAATATCGATCTTAAAACGATTGGCTTCTTCTCGCTGGTTGGTCAGGCCTATGTGTTTAAGTTTCTCTGGTCCCCGCTGATGGACCGCTACACGCCGCCTTTTTTAGGTCGTCGTCGCGGTTGGTTACTCGCCACCCAACTGTTGTTACTGGCGGCGATTGCGGCGATGGGCTTTCTTGAACCCGGCACGCAGCTACGCTGGATGGCGGCGCTGGCGGTGGTGATTGCTTTTTGCTCCGCCTCGCAGGATATCGTGTTCGACGCCTGGAAAACC…	ATG	TAA
SL1344_3550	ATGCGCGGATTACGTAATATTTATAACCTCGGCGTCAAAGAACTGCGCAGTCTGCTGGGCGACAAAGCGATGCTGGCGCTGATCGTCTTCGCCTTTACGATTTCGGTTTACTCCTCTGCTACCGTCCTGCCCGGTTCGTTGCATCTTGCCCCTATCGCCATCGCCGATATGGATCAGTCGCAGTTGTCGAACCGTATTGTGAATAGTTTTTACCGCCCGTGGTTTCTGCCGCCGGAGATGATTACGGCAACGGAAATGGATGCCGGACTGGATGCCGGACGCTATACCTTTGCGGTCAATATTCCGCCGAATTTCCAGCGTGATGTGCTGGCCGGACGTCAGCCTGATATTCAGGTTAACGTCGATGCGACGCGCATGAGCCAGGCGTTTACCGGCAAC…	ATG	TAA
SL1344_1411	ATGGCAAAACCGATCATCACGCTCAATGGTCTAAAAATCGTCATTATGCTGGGAATGCTGGTAGTTATTCTGAGCGGTATCCGCTTCGCCGCAGATATCATTGTTCCCTTTATTTTGGCGTTATTTATTGCAGTCGTTCTCAATCCCGTTGTGCAACGGATGACCCGATGCCGAATTCCGCGCGTTATCGCCGTATCATTGCTCATTGTGATTATTGTTATGTTAATGGTACTACTACTGGCCTATTTGGGGACATCATTAAATGAACTGGCTCGTACCCTACCGCAATATCGCTCCTCATTGGTGATACCGTTGCAACGTATTGAACCGTGGTTGCAGCGAGCTGGCATTGGCGTGTCGGTTGATGAGCTGGCGAAATATATCGATCCAAACGCCGCC…	ATG	TAA
clcA	ATGAAAACAGACACTTCCACCTTTTTAGCTCAGCAAATTGTGCGTTTACGGCGCAGAGATCAGATTCGCCGGTTAATGCAGCGGGATAAAACGCCGCTGGCCATCCTGTTCATGGCGGCCGTTGTCGGCACGCTTACCGGACTGGTTGGCGTCGCCTTTGAAAAGGCGGTTTCCTGGGTACAAAACATGCGCATTGGCGCGCTGGTTCAGGTCGCGGACCATGCGTTTTTGCTTTGGCCGCTGGCCTTTATCCTTTCGGCGTTACTGGCGATGGTCGGCTACTTTTTGGTGCGAAAATTTGCGCCGGAAGCCGGCGGCTCGGGTATCCCGGAAATTGAAGGTGCGCTGGAGGAGTTACGTCCGGTGCGCTGGTGGCGCGTGTTGCCGGTGAAGTTTATC…	ATG	TGA
SL1344_2574	ATGAAATTCAAGAGTATTGCTAAAACTGTTTTTCTTTTTGCACTGCTAACCTCAGCTGGCTTTGCAACTGGTAAAAACGTGAATGTCGAATTCGATAAAGGACAAAATAGCGCCCGCTATTCCGGCGTAATAAAGGGATACGATTACGATACATATAACTTCCAGGCCAGAAAGGGGCAGAAAGTACATGTAAGTATTTCGAATGAAGGCGCAGATACCTACCTGTTCGGGCCAGGAATTAGCGATTCCGTTGACCTGTCCAGATATTCATCTGAACTGGATGGCAATGGCCAGTACACGCTACCGGCGTCCGGAAAATACGAACTGAAAGTACTTCAGACACGTAATGAAGCTCGTAAAAACAAAGCGAAAAAATACAGCGTCAATATTCAGATAAAA…	ATG	TAA
cspH	TTGTCTCGTAAAATGACAGGAATTGTCAAAACCTTTGATTGTAAGAGCGGTAAAGGTCTCATCACCCCCTCCGATGGACGCAAAGATGTTCAGGTCCACATTTCAGCATGTCGCCAACACGAAACAGAAGCGCTTATCCCCGGTATACGCGTTGAGTTTTGTCGTATTAATGGCCTCCGCGGACCTACCGCCGCCAACGTTTATCTTTCATAA	TTG	TAA
SL1344_2456	ATGCTCGAAATGTTAATGCAATGGTATCGCCGTCGCTTCAGCGACCCGGAGGCGATTGCCTTGCTGGTCATTCTGGTGGCTGGTTTTAGCATCCTCTTTTTCTTTAGCGGCCTGTTAGCGCCGCTGCTGGTCGCTATCGTACTGGCCTACCTGCTGGAGTGGCCGACGGCGCGCCTGCAGGCGATTGGCTGTTCCCGGCGCTGGGCAGCCTCCATTGTCCTTATCCTTTTTGTCGGCATTCTGTTATTAATGGCGTTTGTGGTGATGCCGATTGCCTGGCAGCAGGGTATTTACCTGATTCGTGATATGCCCGGTATGCTGAATAAACTGTCCGATTTCGCCGCGACCTTGCCGCGACGCTATCCGGCGCTGATGGATGCGGGCATTATTGATGCGATG…	ATG	TGA
SL1344_3199	ATGGAACTACTGACTCAATTGCTGAATGCCCTGTGGGCTCAGGACTTTGAAACACTGGCCAATCCTTCCATGATTGGCATGTTATATTTTGTGTTATTTATGATTTTGTTTCTGGAAAATGGGCTGCTCCCTGCCGCCTTTTTGCCTGGCGACAGCCTGTTGATCCTGGTCGGCGTGCTGATCGCCAAAGGCGCGATGGGTTATCCACAAACCATTTTGCTGCTTACCGTCGCGGCCAGCCTGGGTTGCTGGGTCAGCTATATTCAGGGCCGCTGGCTGGGGAATACCCGCACCGTGCAAAACTGGCTCTCTCATCTCCCCGCACATTATCATCAACGCGCCCATCACCTTTTCCATAAACACGGCCTGTCGGCACTATTGATAGGCCGTTTTATCGCG…	ATG	TAA
SL1344_1025	TTGAGCCTGACGCTGGCTTTATCCGCAATTACCGCGACAGCCAGTACGGTACTGATGCTGCCCTCCCCCGGCCTGATTCTGACGCTGGTCGGTATGTATGGGCTGATGTTCCTGACCTATAAAACCGCCAATAAGCCGGTCGGTATCCTGTCTGCTTTTGCGTTTACCGGCTTCCTCGGCTATATCCTGGGCCCGATTCTTAACGCCTATCTGTCAGCAGGCATGGGCGATGTCATTGGCCTGGCGCTGGGTGGAACCGCGTTAGTATTTTTCTGCTGCTCCGCTTACGTTCTGACCACCCGTAAGGATATGTCTTTCCTGGGCGGTATGTTAATGGCCGGGATCGTCGTCGTGCTGATTGGTATGGTGGCGAATATTTTCCTGCAACTGCCTGCATTG…	TTG	TAA
ccmE2	GTGAACCTGCGACGTAAAAACCGGCTATGGGTGGTCTGCGCGGTGCTGGCGGGCCTGGGGCTGACCACCGCCCTGGTCCTGTACGCGCTGCGCGCGAATATCGACCTGTTCTATACCCCCGGCGAAATCCTCTACGGCAAGCGCGAGACGCAGCAGCTGCCGGCGGCGGGCCAGCGCCTGCGCGTCGGCGGGATGGTGATGCCCGGCAGTGTCAGGCGCGACCCGGACTCGCTGAAGGTGAACTTCAGTCTCTACGACGCCGAAGGGTCGGTGACGGTGAGCTATGAGGGGATACTGCCGGACCTGTTCCGCGAGGGGCAGGGGGTGGTGGTGCAGGGCACCCTGGAGAAGGGCAACCACGTCCTGGCGCACGAGGTGCTGGCCAAACATGACGAGAAC…	GTG	TGA
dsbA	ATGAAAAAGATTTGGCTGGCGCTGGCTGGTATGGTTTTAGCTTTTAGCGCCTCGGCAGCACAGATCAGCGACGGTAAACAGTATATCACGCTGGATAAACCGGTCGCTGGCGAACCCCAGGTACTGGAGTTTTTCTCCTTCTACTGCCCACATTGTTATCAGTTTGAAGAAGTGCTTCATGTGTCTGACAATGTGAAGAAAAAGCTGCCGGAAGGCACCAAAATGACCAAGTACCACGTTGAGTTCCTGGGGCCGTTGGGCAAGGAGCTCACCCAGGCATGGGCGGTGGCGATGGCGTTGGGTGTAGAAGATAAAGTCACGGTCCCGCTGTTTGAAGCCGTACAGAAAACCCAGACAGTACAATCTGCCGCGGATATCCGTAAAGTGTTCGTTGATGCG…	ATG	TAA
gcvA	ATGTCAAAACGATTACCTCCTTTAAATGCGTTACGCGTTTTTGATGCTGCCGCGCGTCATTTGAGCTTTACGCGAGCAGCGGAAGAACTTTTTGTGACGCAGGCCGCAGTAAGCCACCAAATTAAGTCACTTGAGGATTTTTTGGGGCTAAAACTGTTCCGCCGCCGCAATCGTTCGCTGCTGCTGACGGAAGAAGGCCAAAGCTATTTTCTCGACATTAAAGAGATATTTTCCCAGCTCACGGAAGCAACGCGTAAGCTCCAGGCGCGCAGTGCCAAAGGGGCGCTGACGGTGAGTTTACCGCCCAGTTTTGCCATCCAGTGGCTGGTGCCCAGGCTCTCCAGCTTTAACTCAGCTTATCCGGGAATTGACGTTCGGATACAAGCCGTTGACCGTCAG…	ATG	TAA
sgaB	ATGACCGTACGTATTCTGGCTGTGTGTGGCAACGGACAGGGCAGTTCCATGATCATGAAAATGAAAGTGGACCAGTTTTTAACCCAATCAAACATTGACCACACGGTAAACAGCTGCGCGGTTGGCGAGTACAAAAGCGAGTTGAGCGGCGCGGATATCATCATCGCTTCTACCCATATTGCAGGCGAAATCAGCGTGACCGGCAACAAATATGTGGTTGGCGTGCGCAACATGCTGTCGCCTGCGGATTTTGGCCCGAAACTGCTGGAAGTGATCAAAGAACATTTCCCGCAAGACGTGAAGTAA	ATG	TAA
trpR	ATGACCCAGCATTCCCCTTATTCATCGGCTATCGCCGAACAACGTAATCAGGAGTGGCTTCGTTTTGTGGAGTTACTCCGTCAGGCATATGCAGAGGATCTGCATCTGCCTTTATTACAACTGATGCTTACGCCGGACGAGCGTGAAGCGCTGGGAACGCGCGTGCGCATTATTGAGGAGTTGTTGCGTGGCGAAATGAGCCAGCGCGAGTTGAAAACCGAGCTGGGGGCGGGCATCGCCACCATCACGCGCGGGTCAAACAGCCTGAAATCCGCGCCGGTTGAACTGCGTCATTGGCTTGAGAACGTACTGCTGAAAAACGCCTGA	ATG	TGA
ybfF	ATGAAATTAAACATCCGAGCGCAATCTGCACAAAACCTGCACAATAATTCCCCCATCGTTCTCGTTCATGGCCTGTTTGGCAGCCTGGACAACCTCGGCGTACTGGCGCGCGATCTGGTGACCGATCACGACATTATTCAGGTCGATATGCGCAATCATGGTTTATCGCCGCGCGATCCGGTCATGGATTATCCGGCAATGGCCCAGGATCTTCTGGATACGCTTGACGCGCAGCAGATTGAAAAAGCGACGTTTATTGGTCATTCCATGGGTGGAAAAGCGGTAATGGCGCTGACGGCGCTGGCGCCCGATCGCATCGATCGTCTGGTCGCGATTGATATCGCCCCCGTGGATTATCACGTTCGCCGCCACGATCGCATTTTCGCGGCCATTAACGCC…	ATG	TAA
btuR	ATGAGTGATGAACGTTATCAGCAGCGCCAGCAGAAGGTAAAAGATCGGGTTGACGCCCGTGTCGCCCAGGCACAGGAAGAGCGCGGTATTATTATCGTGTTTACTGGCAATGGTAAGGGCAAAACCACGGCGGCTTTCGGAACTGCCGCCCGCGCCGTAGGACACGGTAAAAACGTAGGCGTGGTGCAATTTATTAAGGGCACCTGGCCCAACGGCGAGCGTAATCTGCTGGAACCGCATGGCGTCGAATTTCAGGTGATGGCAACGGGATTTACCTGGGAGACGCAAAATCGCGAGGCAGACACCGCAGCATGTATGGCCGTTTGGCAGCATGGGAAACGGATGCTGGCCGATCCGCTGCTTGATATGGTAGTACTGGATGAGCTGACCTATATGGTG…	ATG	TAA
cyoA	ATGAGACTCAGGAAATACAATAAAAGTTTGGGATGGTTGTCATTAATTGCAGGCACTGCATTACTCAGTGGCTGTAATTCTGCGCTGCTGGATCCCAAAGGACAGATTGGACTGGAGCAACGTTCGCTGATACTGACGGCATTTGGCCTGATGTTGATCGTCGTTATTCCCGCCATCTTGATGGCTGTTGGTTTCGCCTGGAAGTATCGTGCGAGTAATAAGGATGCGAAGTATAGCCCGAACTGGTCACACTCCAATAAAGTGGAAGCCGTGGTCTGGACGGTGCCTATCTTAATCATCATTTTCCTTGCCGTACTGACCTGGAAAACCACGCACGCGCTTGAACCAAGCAAGCCGCTGGCGCATGACGAAAAACCGATCACCATCGAAGTGGTTTCC…	ATG	TGA
pntB	ATGTCTGGAGGATTAGTTACAGCTGCATACATTGTTGCCGCGATCCTGTTTATTTTCAGTCTTGCCGGGCTTTCAAAGCATGAAACGTCCCGCCAGGGGAATAACTTCGGTATTGCCGGGATGGCGATCGCGTTGCTGGCGACCATTTTCGGGCCGGATACCGGCAACGTGGCATGGATTCTGGTCGCCATGATTATTGGCGGCGCGATTGGCATCCGCATGGCGAAAAAAGTTGAGATGACCGAGATGCCGGAGCTGGTCGCGATTCTGCACAGTTTCGTGGGCCTGGCGGCGGTACTGGTTGGCTTTAACAGCTATCTGTACCATGACGCCAGTCTGGCGCCGGTGCTGGTGAATATTCATCTGACCGAAGTCTTCCTCGGTATCTTTATTGGCGCA…	ATG	TAA
SL1344_2573	ATGAACGTGAATAAAAAAAAACTGGCTGAAATTTTTGGTTGTGACGTCAGAACTGTCACAGCCTGGCAAAGCCAGGGGCTGCCACTTGTTTCCGGAGGAGGAAAAGGTAACGAAGCAGTGTTCGACACCGCGGCAGCGATTTCATGGTACGCGGAGCGTGATGCGTCTATTGAAAATGAAAAGCTGCGTAAAGAGGTTGATGATTTACGTGCCGCTGCGGAATCAGATCTTAATCCCGGCACCATCGACTATGAGCGCTACCGCCTGACAAAAGCCCAGGCGGATGCGCAGGAACTTAAAAATGCTGAGCGCGAAGGGCTGGTTCTTGAGACCGAACTGTTCACCTACATCCTGCAACGGGTGGCTCAGGAAATAGCAGGGATACTGTCAAGGGTACCG…	ATG	TAA
cbiQ	ATGACCGGGCTTGATCGACTCAGCTATCAAAGCCGCTGGGCACACGTTGCGCCGCAGCGCAAGTTTTTGCTGTGGCTGGCGATGATGATACTGGCGTTTGTTCTGCCGCCTGTAGGGCAGGGCATTGAGCTGCTGATCATTGCCGGATTGAGCTGTTGGCTATTGCGCATATCCCTCTGGCGCTGGTGTCGATGGATGGCGATACCTTTTGGATTTTTGTTGGTCGGCGTGATAACGATTATCTTCAGCATCAGCCGCGAGCCGCAAATGCTGCTGGCTGGCATATCTGTTGGGCCGTACTGGATCGGGATTACCCGTGCGGGCGTGGTTACGGCGAATGAAACGTTCTGGCGTAGCCTGACGGCGCTGTCCGCGACGTTGTGGCTGGTGATGAACCTA…	ATG	TAA
SL1344_4464	ATGTTAAAGCGAATTAAAATTGTTACCAGCTTACTGCTGGTATTGGCGCTATTTGGCCTTTTACAACTGACATCCGGCGGGCTGTTCTTCAACTCGCTGAAGAATGACAAAGAAAACTTCACCGTATTGCAAACTATTCGTCAGCAGCAGTCTGCCCTGAATGCAACCTGGGTGGAGCTGTTGCAAACGCGTAATACCCTGAATCGCGCGGGTATCCGCTGGATGATGGACCAGAGCAATATTGGCAGCGGCGCAACTGTCGCTGAACTGATGCAGGGGGCGACCAATACGCTGAAGCTGACCGAAAAAAACTGGGAGCAGTATGAGGCGTTACCGCGCGATCCACGTCAGAGTGAAGCGGCTTTCCTTGAGATCAAACGAACCTATGATATCTACCAC…	ATG	TAA
SL1344_2455	ATGGTGAACACCCTGGACGAGGCGCTGGAAAACTGCGGCCGGCATATTTATCAGGCTACGGGACGTGAGGTGATTAACGCTCCCGGCGCGGCAGGCGGAATGGGCGCCGCGCTTTTAGGGTTGCTCAATGCTGAATTACGCGCCGGCGTAGAGATTGTCGTGGAAACGCTACAGCTTGAGCAGGCGGTTAAAGATGCCGATCTGGTGATGACCGGAGAAGGGCGTCTGGCGCGGCAAGCCTGA	ATG	TGA
SL1344_3198	ATGGCTACGCAACGAGCATCAGGGCTACTGCAGCGTTTAGCGCAAGGCAGTCTGGTTAAACAAATTTTAGTGGGTCTGGTACTGGGGATTTTACTGGCATGGATTTCTAAGCCTGCGGCAGAAGCGGTTGGCTTGCTTGGCACCCTGTTCGTCGGCGCCTTAAAAGCGGTCGCCCCCGTTCTGGTGCTGATGCTGGTAATGGCCTCGATCGCCAACCACCAGCACGGCCAAAAAACCAATATTCGCCCTATTCTCTTTCTTTACCTGCTAGGCACCTTTTCAGCCGCGCTGGCGGCCGTTGTGTTCAGCTTCGCCTTCCCTTCAACGCTGCATCTGTCCAGTAGCGCCCAGGATATCGTGCCGCCGTCCGGCATTGTAGAAGTCTTGCGCGGTCTGCTG…	ATG	TAA
SL1344_2731	ATGCTTTTGCTTTTTAGATCACCAAAATATAGCAGGAAGATTTTTTTCACTCTAGAAGGAGAAAGTGATATTAGATTTCTTAATACTCATTTTGCAGATGAGAGAATCCATTATGATTCGCCGTGTAGTGGTAAACCAGAAGTAATAAATGCTGTGCAATTATTGCGCTCTCATGGAAAACAAAACGTATATGGTTTATGCGATGCTGACTTTGATATTTTAGAAGGTAACAGCTACGAAAACATTCATTTTACGGACTGTCACGATCTCGAAATGATGTTAATAGAAGGTGGTTCATTTGACAAATTTATTTCTGAGTTCTTAAAGACAAGTATACTTAGAATACATACTCTTGAAGATATACGAAATAATCTTAAAGAATCTATAATTGACGTGACT…	ATG	TAA
SL1344_1024	ATGTTGATCTTTGAAGGTAAAGAAATCAGTACTGATAGCGAAGGCTATCTGAAAGAGACGACGCAGTGGAGTGAAGCGCTGGCAGTCGCTATCGCCGCCAATGAAGGCATTGAGCTCTCTGCGGAACACTGGGAAGTCGTGCGCTTCGTGCGCGAATTTTACCTGGAGTTTAATACCTCTCCCGCCATCCGAATGCTGGTAAAAGCGATGGCGAATAAGTTCGGCGAAGAAAAAGGCAATAGCCGCTATCTGTATCGTCTGTTCCCGAAAGGCCCGGCAAAGCAAGCGACCAAAATCGCCGGTCTGCCCAAGCCGGTAAAATGTATTTAA	ATG	TAA
ccmF2	ATGATGCCTGAATACGGCCACGCGCTGCTGTGCCTGGCGCTCGGCGTGGCGCTGCTGCTGTCCGTTTACCCGCTGTGGGGCGTGGCGCGCGGTGACGCGCGGATGATGGCGTCGGCCGGGGTGTTCGCCTGGCTGCTGTTTATCTGCGTGGCGGGCGCGTTTTTCGTGCTGGTGCACGCCTTTGTGGTTAACGACTTCACCGTGGCCTATGTCGCCGGCAACTCGAACACGCAGCTGCCGGTGTGGTACCGGGTGGCCGCCACCTGGGGGGCGCACGAGGGCTCGCTGCTGCTGTGGGTGCTGCTGATGAGCGGCTGGACCCTGGCGGTGGCGGTGTTCAGCCGGCAGGTGCCGGCGGATATCGTCGCCCGGGTGCTGGCGGTGATGGGGATGGTCTGC…	ATG	TGA
SL1344_3944	ATGAACGACAACGCTTTTACTTTCCAGACGCTACACCCGGAAACCATCATGGATGCGCTGTTTGAACAGGGGATCATGGTGGATTCCGGGCTAACTCCACTAAACAGTTATGAAAACCGCGTCTATCAGTTTCAGGATGAAGACCGTCGACGTTTTGTCGTTAAGTTTTATCGTCCTGAACGCTGGTCTGTTGATCAAATTCGGGAAGAACATCAATTCGCGCTTGAACTGGTGAAGGATGAGGTTCCGGTTGCTGCTCCGCTCGCGTTTAATGGCCAGACGCTGTTAGCGCATCAGGGCTATCATTATGCCATTTTCCCCAGCGTAGGCGGTCGTCAGTTTGAAGCAGACAATATCGATCAGATGGAGGCGGTAGGGCGTTATCTTGGCCGATTGCAT…	ATG	TAA
SL1344_2961	ATGACCAGCCGTTTTATGCTGATTGTCGCCGCTATCAGCGGTTTTATTTACGTTGCTCTGGGCGCGTTCGGGGCGCATGTTTTGAGTAAAACCCTGGGCGTGGTTGAAATGGGCTGGATTCAGACCGGCCTGCAATATCAGGCGTTCCATACGCTGGCGATCTTTGGCCTGGCGGTGGCGATGCAGCGCCGTATCAGCATCTGGTTTTACTGGAGCAGCGTTTTTCTGGCGCTGGGCACGGTGCTGTTTAGCGGCAGCCTGTACTGCCTTGCGCTTTCGCATCTGCGCCTGTGGGCGTATATCACGCCTGTCGGCGGCGTCAGTTTCCTGGTGGGCTGGGCGCTATTGCTGATTGGCGCCATTCGTATGAAACGTAAGGGCGCGAGCCATGAATAA	ATG	TAA
sgaT	ATGGAGATCCTCTACAACATCTTTACCATTTTCTTTAATCAGGTAATGACCAATGCCCCGCTATTACTGGGTATTGTGACCTGCCTGGGCTATATCCTGCTGCGCAAAAGCGTCAGTGTGATCATCAAAGGGACGATCAAAACCATCATTGGCTTCATGCTGCTACAGGCCGGGTCCGGCATTCTGACCAGCACCTTTAAACCGGTGGTGGCGAAAATGTCTGAGGTCTACGGCATCAACGGCGCGATTTCCGATACCTATGCTTCGATGATGGCAACGATCGAACGGATGGGTGATGCGTATAGTTGGGTAGGCTACGCGGTGTTGCTCGCGCTGGCGCTGAATATTTGTTACGTCTTGTTGCGACGCATTACCGGTATTCGCACCATCATGTTGACC…	ATG	TAA
SL1344_0677	ATGGCCAAAGAACAAACGGACCGTACGACATTAGATCTGTTCGCGCACGAGCGTCGCCCGGGACGACCTAAAACGAATCCGCTTTCGCGCGATGAACAGTTACGCATCAACAAGCGCAACCAGTTAAAACGCGACAAAGTTCGTGGCCTCAAGCGTGTCGAATTAAAACTCAACGCACAAGCGGTTGACGCGCTGAATGAGCTGGCCGAAGCGCGCAACATTAGCCGCAGCGAGCTCATTGAAGAAATATTAATGAAGCAGCTTATGGCGCTGCGCGGCTAG	ATG	TAG
SL1344_4148	ATGGCTGGAAAAATTCAAATTAACCGTATTACCAACGCCAATATTTATCTTGATGGTAATAATCTTTTAGGTCGCGCGAGTGAAATTAAACTGCCTGATATCAGCATGATTATGCAGGAGCATAAAGCGCTGGGGATGGTCGGTAAAATTGAACTGCCTGCCGGTTTTGACAAACTGGAAGGTGAAATTAAATGGAACTCGTTTTACCACGACGTCATGCGTAAAACGGCAAATCCGTGGCAGGCGGTGGCATTGCAGTGCCGCTCCAGCATCGATTGTTATAACTCGCAGGGTAAAGCGGATCAGTTAGCGCTGGTGACGCATATGACCGTAATGTTTAAAAAGAACCCGCTGGGAACGTTTAAACAGAATGAAAACCCGGAATTCAGCAGCGCCTTC…	ATG	TAA
SL1344_1649	ATGCATTACCAACCGAAACAAGATCTATTGCAAAACCGCATTATTCTGGTCACTGGCGCCAGCGATGGCATTGGGCGGGAAGCCGCGCTCACGTATGCGCGTTACGGCGCAACGGTGATTCTGCTGGGACGCAACGAAGAGAAACTGCGTCGGGTCGCGCAGCACATTGCTGACGAGCAACATGTTCAACCACAGTGGTTTACGCTCGATCTGCTGACCTGCACCGCTGAAGAGTGCCGGCAAGTGGCCGACCGCATCGCCGCGCACTATCCCCGCCTGGATGGCGTCCTGCACAATGCCGGGTTACTGGGGGAAATCGGCCCAATGAGCGAACAAGATCCGCAGATCTGGCAGGATGTCATGCAGGTAAACGTTAACGCCACCTTTATGCTCACCCAG…	ATG	TGA
cyoB	ATGTTCGGAAAATTATCACTGGATGCAGTACCGTTCCATGAACCTATCGTCATGGTAACGATCGCTGCAATTATCGTCGGGGGACTGGCGATACTGGCAGCGATTACTTACTTCGGTAAGTGGACCTACCTATGGAAAGAGTGGTTAACGTCGGTTGACCATAAACGCCTCGGCATCATGTATATCATCGTCGCGATTGTGATGCTGTTACGTGGTTTCGCCGATGCCATCATGATGCGTAGCCAGCAGGCGCTTGCCTCCGCAGGCGAAGCGGGTTTTCTACCGCCGCACCACTACGATCAGATCTTTACCGCTCACGGCGTAATCATGATCTTCTTCGTGGCGATGCCCTTCGTTATCGGTCTGATGAACCTGGTGGTTCCGCTGCAGATCGGCGCG…	ATG	TGA
nikR	ATGCAACGTGTCACCATCACCCTCGATGACGATTTACTGGAAACGCTGGACAGCCTGAGCCAGCGACGCGGCTATAACAATCGCTCCGAAGCGATCCGTGATATTCTGCGCGGCGCTCTGGCGCAGGAGGCCACTCAGGAACACGGCACACAGGGTTTCGCGGTACTTTCATATGTTTATGAACATGAGAAACGGGATTTAGCCAGCCGCATCGTCTCCACCCAGCATCATCATCATGATTTATCCGTCGCCACGCTGCACGTCCATATCAACCACGATGACTGTCTGGAGATCGCCGTTCTGAAGGGCGATATGGGCGACGTACAGCATTTTGCCGATGATGTTATCGCCCAGCGCGGCGTGCGCCACGGCCACTTGCAGTGTTTGCCGAAAGAAGAC…	ATG	TAA
pntA	ATGCGAATTGGCATACCAAAAGAGCGGTTACCCAATGAAACCCGTGTCGCTGCGACGCCGAAAACGGTAGAGCAGCTACTGAAGCTGGGGTTTAGCGTCGCTATCGAAAGCGGGGCGGGTCAACTGGCAAGTTTTGACGACAAAGCGTTTGCGCAGGCTGGCGCGGATATTGTAGACGGCAATGCTATCTGGCAGTCGGAAATTATTCTCAAGGTTAATGCGCCTGAAGAAGAGGAAATCGCTTTACTGAACCCCGGAACTACGCTGGTCAGTTTTATCTGGCCTGCGCAAAATCCTGGGTTAATGGAGAAACTTGCCGAACGTAAGGTTACGGTGATGGCGATGGACTCCGTGCCGCGTATTTCCCGCGCGCAGTCGCTCGACGCGTTAAGCTCAATG…	ATG	TAA
hemL	ATGAGTAAGTCTGAAAATCTCTATAGCGCGGCCCGCGAGCTGATCCCCGGCGGCGTGAACTCCCCTGTTCGCGCCTTCACTGGCGTGGGCGGCACCCCGCTGTTTATCGAAAAAGCGGACGGCGCTTATCTTTATGATGTCGATGGCAAAGCGTATATCGACTATGTCGGTTCCTGGGGACCAATGGTACTGGGGCATAACCATCCGGCTATCCGCAATGCGGTGATCGAAGCTGCGGAGCGCGGTTTAAGCTTCGGCGCGCCAACCGAAATGGAAGTGAAAATGGCGGAACTGGTCACCAACCTGGTGCCGACCATGGACATGGTGCGCATGGTGAACTCCGGCACCGAAGCGACGATGAGCGCTATTCGCCTGGCGCGTGGTTTTACTGGCCGCGAT…	ATG	TAA
SL1344_2572	ATGATTTCCGGAGAGCGCAGGGCGAATAATGCCAACAGAGCCATAACTAACGGGCTGATAGCGCTTCATATTCCCGTACCGCTTACCACCGTGCAGTGGGCTGATGAGTATTACTATCTGCCAAAAGAGTCCTCCTACACCCCCGGCAAATGGGAAACGCTGCCGTTTCAGGTAGCGATAATGAACGCGATGGGGTATGAACTGATCCGCGTTGTAAACCTCATTAAGTCTGCCCGCGTGGGCTATACCAAAATGTTGCTGGGGGTGGAAGGCTATTTCATAGAGCACAAGTCGCGCAACAGCCTGCTGTTCCAGCCGACCGACTCATCCGCTGAGGATTTTATGAAATCCCACGTGGAGCCGACTATCAGGGATGTTCCTGTATTGCTGGAGCTGGCC…	ATG	TGA
envE	ATGACTTTGCTTTCAGGAAAAACCACACTGGTTCTCTGCCTCTCCTCTATTTTATGTGGATGTACGACGAACGGCTTACCCACACCTTATAGTATTAATTTGTCGTTCCCGGTCATTACACAAAACCAGATTAATTCCGGTGGTTATTACATAAATGACGCGGAACAAATTCGGACAACTGATGGTCTGTGCCTTGATGCAGGCCCAGATCAACAGAATCGTTTGACGCTGCGGGAGTGTAAGCATGTGCAATCTCAGCTTTTCTCATTTCACCGAGACAGAATCACGCAGGGTGAGAAATGTCTGGATGCCGCAGGACAAGGTACAAAAGAAGGCACACCAATCATTCTTTATTCATGCACGGGTAATGATAACCAGCGCTGGCTCACTGATGATAAC…	ATG	TAG
rtcA	ATGGCAAGGATCATCGCGCTGGATGGCGCACAGGGAGAGGGCGGCGGGCAGATTTTGCGCTCGGCGCTGAGTTTATCAATGATAACCGGCCAGCCGTTTGAAATGAGCGGCATCCGCGCCGGGCGCGCTAAACCGGGGCTGCTACGCCAGCATTTAACGGCGGTGCGAGCGGCAACGGAAATCTGCGGCGCGCAGGTGAACGGCGACGAGCTGGGCTCGCAACAGTTGCGTTTTACGCCGGGGCCGATTCGCGGCGGCGAGTACCGTTTTGCGATTGGCAGCGCGGGCAGTTGTATGCTGGTGCTGCAAACCGTCCTGCCCGCGCTGTGGTTTGCTGACGGTTCATCCCGCGTGGAGGTTCACGGCGGGACGCATAATCAGGCCGCGCCCAGCGCTGAT…	ATG	TAA
bcp	ATGAATCCACTGAAAGCCGGTGATATCGCACCGAAATTTAGCTTGCCGGATCAAGACGGGGAACAAGTAAATTTGACCGACTTCCAGGGACAGCGCGTTCTGGTTTATTTCTACCCAAAAGCCATGACACCCGGCTGTACCGTGCAGGCCTGCGGCTTACGCGATAACATGGACGAGCTCAAAAAAGCAGGCGTGGACGTGCTGGGCATCAGCACCGATAAACCTGAAAAACTCTCCCGTTTCGCTGAAAAAGAGCTGCTGAACTTTACCCTTTTGTCCGATGAAAACCATCAGGTGTGTGAACAGTTCGGCGTCTGGGGCGAAAAGTCGTTTATGGGCAAAACGTATGACGGCATTCACCGCATCAGCTTTTTGATTGACGCTGATGGTAAGATTGAA…	ATG	TAA
SL1344_3197	ATGAATACTGTTGGTACGCCATTATTATGGGGTGGATTCGCGGTTGTTGTGGTGATAATGCTATCCATCGACCTGTTGTTGCAGGGACGCCGTGGCGCACATGCGATGTCGATGAAACAAGCGGCAGGATGGTCAATCCTGTGGGTAACGCTCTCGCTACTGTTTAACGCCGCTTTCTGGTGGTATCTGGCTGAAACGCAAGGGCGCGAAGTTGCTGACCCGCAGGCATTGGCGTTCCTTACCGGCTATCTGATTGAGAAGTCGCTGGCCGTAGATAACGTCTTTGTCTGGCTGATGCTGTTTAGCTATTTCTCCGTCCCTCCGGCTCTGCAACGCCGGGTGCTGGTGTATGGGGTTCTTGGCGCGATCGTGTTGCGTACTATCATGATTTTCGCCGGT…	ATG	TAA
SL1344_1023	ATGTCGAACGTCTGCATTATCGCCTGGGTTTATGGTCGCGTTCAGGGAGTCGGGTTTCGCTATACCACGCAGCATGAGGCGCAGCGGCTGGGGTTAACCGGCTATGCGAAGAATATGGATGACGGAAGCGTAGAAGTGGTGGCCTGTGGCGACGCGGCGCAGGTGGAAAAACTCATCAAGTGGCTGAAAGAGGGCGGGCCGCGCTCTGCTCGTGTGGACAAAATCCTCACTGAACCGCACAGCCCTCGCGAGACGTTAACAGGCTTTAGTATTCGGTATTAA	ATG	TAA
rpsS	ATGCCACGTTCTCTCAAGAAAGGTCCTTTTATTGACCTGCACTTGCTGAAGAAGGTAGAGAAAGCGGTGGAAAGCGGAGACAAGAAGCCCCTGCGCACTTGGTCCCGTCGTTCAACGATCTTTCCTAACATGATCGGTTTGACCATCGCTGTCCATAATGGTCGTCAGCACGTTCCGGTATTTGTTTCCGACGAAATGGTCGGTCACAAACTGGGTGAATTCGCACCGACTCGTACTTATCGCGGCCACGCTGCTGATAAAAAAGCGAAGAAGAAATAA	ATG	TAA
ccmG2	ATGAAACGCAACGTACTGTTATTACCGCTGCTGATTTTTCTGCTGATTGCCGCGGCGCTGCTGTGGCAGCTGGCGCGCAACGCGCAGGGGGATGACCCGACGAATCTCGAATCGGCACTGACCGGAAAGCCGGTGCCGGCGTTCCGCCTGGAATCGCTGGAGACGCCGGGTCAGTACTATCAGGCGGAGGTGCTGACGCAGGGGAAACCGGTGCTGCTTAACGTCTGGGCCACCTGGTGCCCGACCTGCCGCGCCGAGCATCAGTACCTGAACCAGCTTTCTGCGCAGGGTATCCGGGTGGTGGGGCTGAACTATAAGGACGACCGGGCGAAGGCGGTGGCCTGGTTAAAGGAACTGGGCAACCCGTATGCGCTGAGTTTATCGGACAGCGACGGGATG…	ATG	TGA
SL1344_3943	ATGAAATGTAAACGCCTGAATGAAGTCATTGAACTCCTCCAGCCAGCCTGGCAGAAAGAGCCTGATCTTAATCTGACGCAATTTTTGCAGAAACTGGCGAAAGAGTCAGGTTTTGACGGCAAACTGGAAGATTTAACTGATGATATCCTGATCTACCATCTGAAAATGCGCGATTCCGCCAAAGACGCCGCCATTCCAGGGATTCAAAAAGACTATGAAGAGGACTTTAAAACGGCGCTTTTACGCGCCCGCGGCGTTATTAAAGAGTAA	ATG	TAA
SL1344_2960	ATGAATAAAGTTGTATTGCTCTGCCGTCCGGGGTTTGAAAAAGAGTGCGCTGCAGAAATTACCGATAAAGCGGGAAAACGGGAAATATTTGGTTTTGCACGCGTAAAAGAGAACGCAGGCTATGTCATTTATGAATGCTACCAGCCGGAAGATGGCGAAAAGCTGATTTCAGAACTGCCGTTCAGTTCGCTGATTTTCGCCCGCCAGTGGTTTGTGGTGGGTGAACTGCTGCAACATTTACCGCCGGAAGACAGAATTACGCCGATTGTCGGCATGTTGCAGGGCGTAGTGGAAAAGGGCGGCGAGCTGCGAGTTGAAGTCGCCGACACCAATGAAAGTAAAGAACTGATGAAGTTCTGCCGCAAATTTACGGTGCCGCTGCGCGCGGCTTTGCGTGAT…	ATG	TAA
SL1344_4315	ATGAGTAAAGTACAAAGCATCACGCGTGAATCATGGATTCTGAGCACGTTTCCGGAGTGGGGAAGCTGGCTGAACGAAGAGATTGAACAAGAGCAGGTCGCGCCGGGTACGTTCGCTATGTGGTGGCTGGGCTGTACCGGGATCTGGCTAAAATCTGAAGGCGGCACTAACGTATGCGTCGATTTCTGGTGCGGTACCGGTAAACAGAGCCACGGTAATCCGTTGATGAAAACCGGCCACCAGATGCAGCGTATGGCTGGCGTCAAAAAATTACAGCCTAACCTGCGCACCACGCCGTTTGTTCTCGATCCTTTCGCTATCCGTCAGATTGACGCCGTCCTGGCGACCCACGACCATAACGATCACATTGACGTCAATGTCGCGGCTGCCGTAATGCAG…	ATG	TGA
slt	ATGATGCTGCATTGGATAACAATTGAGGAAGTGCTTGTGGATAGAGCCAAACCATTTGTCTGGCGTCTCGTCGCCGCCAGCGTATGCCTGCTGACCTTTTGTCACCTCGCGCGGGCCGACTCACTGGAAGAGCAGCGTAACCGCTATGCGCAGATTAAGCAGGCCTGGGACAACCGCCAGATGGATGTGGTAGAGCAGATGATGCCGGGTCTGAAAGATTATCCGCTCTACCCGTATCTGGAATACCGTAAGATCACCGACGATTTGATGAACCAACCGGCGATTGCTGTCACGCAGTTTGTGCGCGCCAATCCTACGCTTCCGCCTGCGCGTACGCTGCAATCACGCTTCGTCAATGAGCTGGCGCGTCGTGAAGACTGGCGCGGCTTGCTGGCGTTT…	ATG	TAA
fldA	ATGGCAATCACTGGCATCTTTTTCGGCAGCGACACCGGTAATACCGAAAATATCGCAAAAATGATTCAAAAACAGCTTGGTAAAGACGTTGCCGATGTGCATGACATTGCAAAAAGCAGTAAAGAAGACCTGGAAGGGTATGACATTCTGCTGCTGGGCATCCCAACCTGGTATTATGGCGAAGCGCAATGTGACTGGGATGACTTCTTCCCGACTCTCGAAGAGATTGACTTTAACGGTAAGCTGGTGGCGCTGTTTGGCTGTGGCGATCAGGAAGACTACGCGGAATACTTCTGTGATGCGCTGGGCACGATTCGCGACATTATTGAGCCGCGCGGCGCCACGATTGTGGGTCACTGGCCAACCGCAGGCTATCATTTTGAAGCCTCTAAAGGTCTG…	ATG	TAA
SL1344_1648	GTGGAATTGTTGTCTGAATATGGCTTATTTTTGGCAAAAATCGTCACCGTTGTGGTGGCCATTGCCGTCATTGTGCTGCTGATCGTGAATGCTACGCAACGCAAACGTCAGCGCGGCGAGCTGCGCGTGACCAATTTGAGTGAGCAGTATCAGGAGATGAAGGATGACCTTGCTGCGGCGTTGATGGATGGCCATCAGCAAAAACTGTGGCATAAAGCGCAGAAAAAAAAGCATAAGCAGGAGGCGAAAGCCGCCAAAGCGAAAGCGAAGCTGGGGGACATTGCGACATCGGACAAACCGCGCGTATGGGTGATAGATTTCAAAGGCAGTATGGACGCTCACGAAGTTAATGCGTTACGCGAAGAGGTCACGGCGGTGCTGGCAGTGGCGAAACCCGGC…	GTG	TAA
cyoC	ATGAGCGACTGCATTCTGTTCTCTATTCTGTTTGCTACCTATGCCGTTCTGGTGAACGGCACCGCTGGCGGCCCGACAGGTAAGGACATTTTCGAACTGCCGTTCGTTCTGGTTGAAACCTTCCTGCTGTTATTTAGCTCCATTACCTACGGCATGGCGGCGATCGCTATGCACAAGAACAACAAGAGCCAGGTTATCTCCTGGCTGGCGTTGACCTTCTTGTTCGGTGCCGGATTTATCGGGATGGAACTCTATGAATTCCATCACCTGATTGTTAACGGTATGGGCCCGGATCGCAGCGGCTTCCTGTCTGCGTTCTTCGCGCTGGTCGGCACGCACGGTCTGCACGTCACTTCCGGTTTGATCTGGATGGCGGTGCTGATGGTGCAAGTTGCCCGT…	ATG	TAA
SL1344_1408	ATGAAGCTTAAGAACACTCTCCTGGCGTCGGCTCTGCTTTCTGCGGCTGCTTTTTCTGTCCATGCAGCAACAGAACTGACGCCGGAGCAAGCGGCTGCACTAAAACCTTATGACCGCATCGTTATTACCGGTCGTTTTAATGCTATTGGCGATGCGGTCTCCGCCGTGTCCCGCCGCGCAGATAAAGAAGGCGCAGCCTCCTTCTATGTTGTCGACACCTCGGAGTTCGGCAACAGTGGTAACTGGCGTGTTGTGGCGGACGTGTATAAAGCCGACGCGCCGAAAGCCGACGCGCCCAAAAATCGTGTCATTAATGGCATCGTGGAATTACCGAAAGACCAGGCCGTACAATTAGAACCGTATGACACCGTCACCGTTCAGGGCTTCTACCGTAGCCAG…	ATG	TAA
SL1344_2571	ATGGCAACAATCACTGAGCTACAGGAAGCCCGCGTCGCGCTGCATGACCTGATGACGGGAAAACGGGTGGCGACGGTTCAGAAAGACGGGCGACGGGTTGAATTTACCGCGACATCGGTAGGGGATCTGAAAAAATATGTCGCGGAACTTGAGGCGTCACTGTGCAATGGTCGCCGCCGGGCACCTGTGGGGGTGAGACTGTGA	ATG	TGA
cbiO	ATGCTTGCCACTTCAGACCTGTGGTTTCGTTATCAGAATGAGCCGGTACTTAAAGGGTTAAATATGGATTTTTCGCTTTCGCCTGTTACCGGTTTGGTGGGCGCGAACGGCTGTGGGAAGTCTACGCTTTTTATGAACCTGAGCGGCTTGTTGCGTCCGCAAAAAGGGGCCGTGTTGTGGCAGGGAAAACCGCTGGATTACAGCAAGCGCGGACTACTGGCGCTGCGCCAGCAAGTTGCGACGGTTTTTCAGGACCCTGAACAGCAGATTTTTTATACTGATATCGATAGCGATATTGCATTTAGTTTACGTAATTTGGGGGTGCCGGAGGCGGAAATCACGCGCCGCGTCGACGAGGCGCTAACGCTGGTTGACGCCCAACATTTTCGCCATCAGCCC…	ATG	TGA
cstA	ATGGATACGAAAAAGATATTCAAGCACATACCCTGGGTGATTCTCGGAATCATCGGTGCTTTCTGCCTCTCGGTCGTTGCCCTACGTCGGGGTGAACACGTGAGCGCCCTGTGGATCGTGGTCGCTTCCGTTTCCGTCTATCTGGTGGCTTACCGCTACTACAGCCTGTACATCGCCCAGAAGGTCATGAAACTCGACCCGACGCGCGCGACGCCGGCGGTTATCAATAACGACGGCCTGAACTACGTGCCGACTAACCGCTACGTGCTGTTTGGTCACCACTTCGCCGCCATCGCTGGCGCAGGTCCGCTGGTCGGGCCGGTATTGGCCGCGCAGATGGGCTATCTGCCGGGGACACTGTGGTTACTGGCGGGCGTGGTGCTCGCGGGCGCAGTGCAG…	ATG	TAA
gcvR	TTGACACCGTCATCACAACACTATTTGGTTATCACTGCGCTGGGCGCCGACAGGCCCGGTATTGTGAATACCATTACTCGCCATGTCAGCAGTTGCGGCTGTAATATCGAAGACAGCCGACTGGCGATGCTGGGCGATGAATTCACGTTTATTATGCTGTTGTCCGGCACGTGGAACGCGATTACCTTGATTGAATCGACATTGCCGTTAAAAGGCGCGGAGCTGGATCTGCTGATTGTGATGAAACGGACGTCCGACCGCCCCCGCCCGGCAATGCCCGCGACGGTATGGGTTCAGGTTGAGGTCGCCGACTCCCCGCATTTAATTGAGCGATTCACCGCGCTGTTTAATAGTCATGAAATGAATATTGCGGAGCTGGTCTCCCGCACGCAGCCGGCT…	TTG	TAA
SL1344_2730	ATGGAACTCAGAAGAATATCTGTAAATAATTTGTTCGGAATTTTAAACTATGATATTGATTTAGGGAACTCAGAAACAATTATTATTACCGGACCAAATGGTTACGGAAAAACCATGCTTTTAAAGATAATTGACAACATTTTAAATAAAAATATAGATTTTTTCTTTGATTTGCGATTTGAAGAAATAAAATTTGAACTTGACACCATATTACTATGTATAGAGAAACAAAAAAATAAGAATGTTGCAGTTACGGTAGTCGATTATGTAAACGATAAAAAACGACAGGAAGTATTCACTCTAAATAAAAACAAAGAACTTGACGTCGATTATTTTGATGAAATATATAATAAACTATTAATCTGTGACAACATAGATTCTGATCCTATACTAAAATCT…	ATG	TGA
SL1344_3196	ATGATACGTTTCGCTGTAATTGGGACTAACTGGATCACGCGCCAGTTTGTCGACGCCGCCCATGAAACCGGCAAATTCAGGCTCGCCGCCGTTTACTCCCGTAGTCTTGAACAGGCGCAGTCTTTCGCAAATGATTATCCCGTCGAGCATCTATTTACCTCGCTGGAAGCGATGGCGCAAAGCGACGCGATTGAGGCGGTTTATATCGCCAGCCCGAATTCCCTGCATTTCTCCCAGACGCAGCGCTTTTTGCAGCATAAAAAACATGTCATGTGCGAAAAGCCGCTGGCTTCTAACCTGGCGGAGGTTGATGCCGCTATCGCCTGCGCGCGCGATAATCAGCGGGTACTGTTTGAAGCCTTTAAAACCGCCTGCCTGCCCAATTTCCTGCTGCTGCGG…	ATG	TAA
SL1344_1022	ATGCATATTCGACATCAGGATCTTACGACGGCAGAGGTGCGTTCCAGTCATCTGCACCGTTTGCATCGTGTTACGCTTTTTTCCGCCGCTATCTGCCATATTACGCAGGGCAGTAAAGTCATCATTCAGGATGATAGCCGCCTTGTCGCCGGGCCTGGCGAGTTGATTATTATCCCGGCGAACACGCCGCTGGAGATTATTAATCAGCCTGCGCAGAACGGTTTTCGCTCCGACCTGTTATTACTTTCACCGGAGATTATTGCTCGCTTTAAAACGATGTACGTTCAGGATTATCCACCGGCAAACCTGACATCGCTGTGTACCCCGATGAGCCGTAGCCTGACATTTATGTGGGAGAACGTGTTGGATGCTGTGCGCCAGGGGTTGCCCGTTGGGCTA…	ATG	TAA
SL1344_2223	ATGAGACTGTTACCGGGCATGGTGATGCTGATGCTGGTGCTGGTTATCGCCGGGTCAGCGCGGGCGACCACCGACGTGATGCCGTTTAAAGATGAAGCGCAGGAGCAGCAGTTCCGCCAGCTCACGGAGCAGCTGCGCTGCCCGAAATGCCAGAACAACAGCATTGCGGACTCGAACGCGATGATAGCCACCGACATGCGCCGCAGGGTGTATGACCTGATGCAGGAGGGGAAGAGCCGCCAGGAAATCATCGATTACATGGTGGCGCGCTACGGCAACTTTGTCACCTACGACCCGCCGCTGACCCCGCTGACGGTGCTGCTGTGGGTGCTGCCGCTGGCCACCATCGTGGCGGGCGGGTGGATAATCGTCGCCCGCACGCGCCGGCGGGTGCGTATC…	ATG	TAA
mobA	GTGAATCTGGATGAAGTAATAACCGGCGTGGTGCTGGCAGGCGGTAAAGCCAGGCGGATGGGAGGTGCGGATAAAGGTCTGCTTGAACTGGGCGGGAAACCGCTCTGGCGACACGTTGCCGACGCGCTCGCGCCACAACTTGCTACGGTCGTCATTAGTGCTAATCGCCATCTGGATATCTACCAGGCCAGCGGCCTGAAAGTCATTCCGGATTCAATTGCTGACTTTCCCGGTCCGCTGGCGGGTATGCTTTCCGTTTTTCAGCAGGTAGCAGGCGACTGGTTTCTGTTTTGTCCCTGTGACAATCCCTGTATCCCCCACAACCTGGTCGATCGTTTAGCAGCGCAGCGTCATGGTGCACCCGTGGTTTGGGTTCATGATGGAGAGCGCGATCATCCA…	GTG	TGA
fucR	ATGAAAGCGGCACGCCAACAAGCGATAGTCGATCTGCTGATCAATCATAAAAGTCTGACCACCGAAGCGCTGGCCACCCGGCTTAACGTCAGTAAAGAGACCATCCGCCGCGATCTCAGTGAACTACAGACGCAGGGAAAAGTGCTGCGTAATCACGGACGAGCTAAATATATTCATCGTGAAAATCAGGACAGCGGCGATCCATTCCATATCCGCCTGAAAAGCCATTATGCGCACAAAGCCGATATTGCCCGTGAAGCGTTAGCGTGGATAGAAGAAGGAATGACGATTGCGCTGGATGCCAGTTCAACCTGCTGGTATCTGGCCCGCCAGTTGCCGGATATTCCCATTCAGGTTTTTACCAATAGCCATCCTATCTGTCAGGAGCTGGGAAAACGC…	ATG	TAG
yjfQ	ATGACTGAAGCACAAAGACATCAAATACTGCTGGATATGCTGGCACAGTTGGGCTTTGTTACCGTCGAAAACGTGATTGAGCGTCTGGGGATCTCCCCGGCGACAGCGCGCCGCGACATCAACAAGCTCGACGAAAGCGGGAAACTTAAAAAAGTGCGCAACGGCGCAGAGGCCATTACCCAACAGCGGCCCCGCTGGACGCCGATGAATCTGCACCAGGCGCAAAACCACGATGAAAAAGTACGCATCGCGAAAGCGGCGTCGCAGCTGGTAAACCCGGGTGAAAGCGTAGTGATTAACTGCGGCTCCACCGCTTTCCTGCTGGGGCGTGAAATGTGCGGGAAGCCGGTACAGATCATTACCAACTATCTGCCGCTGGCGAATTATCTGATCGATCAA…	ATG	TAA
fur	ATGACTGACAACAATACCGCATTAAAGAAGGCTGGCCTGAAAGTAACGCTTCCTCGTTTAAAAATTCTGGAAGTTCTTCAGGAACCAGATAACCATCACGTCAGTGCGGAAGATTTATACAAACGCCTGATCGACATGGGTGAAGAAATCGGTCTGGCAACCGTATACCGTGTGCTGAACCAGTTTGACGATGCCGGTATCGTGACCCGCCATAATTTTGAAGGCGGTAAATCCGTTTTTGAACTGACGCAACAGCATCATCACGACCATCTTATCTGCCTTGATTGCGGAAAAGTGATTGAATTTAGTGATGACTCTATTGAAGCGCGCCAGCGTGAAATTGCGGCGAAACACGGTATTCGTTTAACTAATCACAGCCTCTATCTTTACGGCCACTGC…	ATG	TAA
SL1344_4147	ATGAACGAAAAATATACCCTGCAGTTCCCGTTTACCTCCGCCGCCGGGGAACGTATCGACGTTCTGCAATTACGTCGCCTGAAGGTAAAAGATATGCGCGCCGCGCGACGCGCCAGCGATAAACCGGAAGAGTGGGATGAGCCGCTGATGGCGGCTATGACCGGGCTGGTAACCGAAGATCTGGCGGAAATGGATCTGCTGGACTATCAGGCATTGCAGAAACGATTTCAGTCCATGCTTAGCATGGCTACAGAACCCACAGCAACTGTGGCAGGCAATGGCGCTGCTGGCGAGGTGGTTTCGCTTTCCGCCCAGTGA	ATG	TGA
SL1344_1647	ATGCATAAAGAGACGCAACCTATCGATCGCGAAACACTGTTGCTTGAAGCCAACAAAATTATTCGGGAACATGAAGACACGATGGCAGGTATTGTCGCCACCGGCGTAACGCAGAGAAATGGCGTGCTGGTTTTCAGCGGCGATTACTTTTTAGACGAGCAAGGGTTACCGACCCCTAAAAGCACCGCGGTGTTTAACATGTTTAAACACCTGGCGCATGTGCTGTCTGAGAAGTATCACCTGGTTGATTAA	ATG	TAA
cyoD	ATGAGTCATTCTACCGAGAGCGGCGGCGCATCCCACGGCAGCGTAAAAACGTACATGACCGGCTTTATCCTGTCGGTCATCCTGACGGTTATTCCATTCTGGATGGTGATGACCGGCGCTGCCTCTCCGGCCGTTATTCTGGGATCTATCCTGGCAATGGCAGTGGTGCAGATTTTGGTGCATCTGGTGTGTTTCCTGCACATGAACACCAAATCTGATGAAGGCTGGAACATGACGGCCTTCATCTTTACCGTGCTGATCATCGCCATCCTGGTTGTGGGCTCCATCTGGATTATGTGGAACCTCAACTACAACATGATGATGCACTAA	ATG	TAA
SL1344_1407	ATGGAAAAAAAACTGGGACTGAGCGCGCTGACCGCGCTGGTTTTAAGCTCAATGCTTGGCGCAGGTGTTTTCAGTCTGCCCCAGAATATGGCCGCCGTTGCCAGTCCGGCTGCGTTGTTAATTGGCTGGGCCATTACCGGCGTGGGGATACTCTTACTGGCATTCGCCATGTTAATCCTTACGCGCATTCGCTCCGAGCTTGACGGCGGTATCTTTACTTACGCCCGCGAAGGCTTCGGCGAACTGATTGGCTTTTGTTCTGCCTGGGGCTATTGGCTGTGCGCGGTCATCGCCAACGTATCCTATTTGGTTATCGTCTTTTCAGCGCTGAGTTTCTTTACCGATACGCCTGCCTTGCGTCTGTTTGGTGACGGTAATACCTGGCAGGCTATTGTCGGC…	ATG	TGA
SL1344_0202	ATGAAAATAATACGGACTTTATTTTTGCTGCTGATTGCCGTTTATGGCAGTTCGGTAGTGGCCAAACCCATGCTGAAAGCGACGTTTTCAAGCACCACGATGTATTATGGTATTGGCCCTAATAGCGACAAATCTATTGTGGCGGAGGTGACGATAGCGACTCCGGAGGGAGTGTACTATGGCTCCTGGAACCTTTCGGGACATCGTAAAGGAGAAACGCTAACCGCAGACTCCTGGTCTGGGCCAGAACCTGCGCCGAAGGTTGTATTGAAGGATTTTGATAACACTGTTTCGCGATCTGCGTGCAAGAATCTTCCCTCGAACTGGAGGGGGTGTGGTTCTTTTACCCTGGAGATTACGGTACAAAGCGATGATTATGGTTGCCCCTGGCTGGCGTCG…	ATG	TAG
SL1344_2570	GTGAAGCGCACCCCGGTTCTGGTGGATGTTCACGGCACGCCGCTGCGGGAAAGTCTGGGATACACCGGCGGGGGGATCGGTTTCGGCGGACAGATGGCTGACTGGATGCCCCCGGCGGAAAGCGTGGATGCCGCGCTGCTGCCTTCGTTGCGCCTCGGCAATGCGCGGGCTGATGATCTGGTCCGTAATAATGGTATTGCAGCAAATGCGGTGGCGCTGCACAAGGATCATATTGTCGGACACCTGTTTCTTATCAGCTATCGTCCAAACTGGCGCTATCTTGGTATGCGTGAGAGCGCAGCGAAGAGTTTTGTGGATGAGGTTGAAGCTGCATGGACAGAATATTGCGATGGTATTTTTGGCGAAATGGATGCCGAGGGGAAGCGTACTTTTACAGAG…	GTG	TAA
msgA	ATGTTCGTCGAACTCGTTTATGACAAGCGAAATGTTGAAGGTTTGCCAGGCGCACGCGAAATCATCCTCAATGAACTCACAAAACGCGTACATCAACTTTTTCCCGATGCGCAAGTGAAAGTTAAGCCAATGCAGGCGAACGCATTAAACAGTGACTGTACAAAAACCGAGAAAGAACGGCTGCACCGTATGCTGGAAGAGATGTTTGAAGAGGCTGATATGTGGCTGGTCGCCGAATAA	ATG	TAA
dapA	ATGTTCACGGGAAGTATTGTCGCGCTTGTTACGCCGATGGATGAGAAAGGTAACGTCAGTAGGTCTTGCCTGAAAAAACTCATTGATTATCATGTCGCCAACGGTACCTCGGCGATTGTTTCGGTTGGCACTACCGGCGAGTCTGCCACGCTAAGCCATGATGAACATGGCGATGTCGTGATGATGACGCTGGAACTGGCTGACGGACGTATTCCGGTTATCGCCGGCACGGGCGCAAACGCGACCGCGGAAGCGATTAGCCTGACGCAGCGTTTTAACGATAGCGGTATTGTAGGCTGCCTGACGGTAACGCCGTACTACAATCGCCCCACGCAGGAAGGTTTGTTCCAGCATTTCAAAGCCATCGCGGAACACACTGACTTGCCGCAAATTCTGTAT…	ATG	TAA
SL1344_3195	ATGCTCTCACAATGTGCCCGTTTTATCCGCCGCCTCTGTTTTACACGCCGGGCCTTAACAGTGGCGTGTTTTCTGCTTGTCGCAGCAGGCGTCGCGCTTTTCTATTCCAACTGGCTTATCGTCAACGCCTCACAGCATCTGACATGGAATGACATTCAGACCGTTCCCGCCCGCAACGTCGGGCTGGTGTTAGGCGCCAAACCCGGCAATCGGTATTTTACCCGGCGGATTAATACTGCCGCCGCGTTGTATCACGCCGGTAAAGTGAAGTGGCTGTTAGTCAGCGGCGATAATGGCAAAAAAGAGTACGATGAACCTTCGGCGATGCAGCAGGCGCTGATGGCGAAAGGTGTGCCGGAGGCGGCCATTTTTTGTGATTATGCCGGATTCTCCACGCTG…	ATG	TAA
SL1344_1021	ATGAAAACAGTCTTCTCTTTGACCGCAGCCGCAATGATGGCATTGAGTGGCGGCGTATCTGCCGCGTCGGCGTTTAGCCTCAGTAGCGCGGATATTCCGGCGGATTTTCGTTTAACGCAACAGCACGTCTTTAAAGGATTTGGTTGTAGCGGAGAAAATATTTCGCCGCAGCTGAGCTGGCGCAATCCGCCTGCCGGAACCAAAAGCTACGCTATTACCGTCTTCGATCCTGATGCGCCCACCGGAAGCGGCTGGTGGCACTGGACGATGGTGAATATTCCTGCGCAGATTCACGACCTGCCGACGGGGGCTGATAAAAAAACGTTACCCGCCGGAGTGGTGCAGGGACGTAATGATTTCGGTTATGCTGGCTTTGGCGGCGCCTGTCCGCCGCCGAGC…	ATG	TAA
narP	ATGCCTGAAGTAACACCTTTTCAGGTGCTTATTGTGGACGACCATCCACTTATGCGGCGAGGTATTCGTCAATTACTGGAACTGGACCCGGCTTTTCATGTCGTTGCCGAAGCGGGTGACGGGGCGAGTGCGATCGATCTGGCGAATCGCATTGAGCCCGATCTGATCCTGCTGGATCTGAATATGAAAGGTCTGAGCGGGTTAGATACCCTGAACGCGCTACGCCGGGATGGTGTGACGGCGCAAATTATTATTCTTACCGTCTCGGATTCCGCCAGCGACATCTACGCGCTGATCGACGCCGGCGCCGACGGTTATCTGCTCAAAGATAGCGATCCGGAAGTGCTGCTGGAGGCCATTCGCAAAGGCGCTAACGGCGGTAAAGTCTTTAGCGATCGG…	ATG	TAA
mobB	ATGATACCGCTACTCGCCATTGCCGCGTGGAGCGGCACGGGAAAAACAACACTGCTGAAAAAACTGATCCCAGCACTTTGTGCGCACGGTATTCGGCCAGGGCTGATTAAGCATACCCATCATGATATGGATGTTGATAAACCGGGTAAAGATAGCTACGAATTACGTAAAGCCGGGGCGGCACAGACGCTGGTTGCCAGTCAGCAGCGCTGGGCGTTAATGACTGAAACGCCGGGGCAAGAAGAGTTGGATCTGGCATGGCTGGTGAGCCGGATGGATGCATCAAAGCTAGATATGGTGCTGGTAGAAGGGTTTAAACACGAGGCAGTTGCGAAGATCTTACTTTTTCGTCAGGGATGTGGGCACAGCGAGGAAGAATTAATTCTTGATGAGCATGTT…	ATG	TAG
fucU	ATGCTAAAAACCATTTCACCGTTAATTTCCCCGACACTGCTCAAAGTGCTGGCCGAGATGGGCCACGGGGACGAAATCATTTTTTCCGACGCTCACTTTCCCGCGCATAGCCTGGGCCCGCAGGTGATTCGCGCCGATGGTCTTAGCGTCAGCGATCTACTGCGGGCAATTATTCCGCTCTTTGAGCTGGATAGCTACGCCCCGCCGCTGGTGATGATGGCCGCCGTGGAAGGCGACACGCTCGATCCCAACGTTGAAGCGCGCTATCGCGATGCCTTGTCATTAGAAGCGCCGTGCCCGGATATCGTTCGTATCGACCGCTATGCGTTTTATGAGCGGGCGCAAAAAGCGTTTGCGATCGTTATCACAGGTGAGTGCGCGAAGTACGGAAATATTCTT…	ATG	TAA
SL1344_4313	ATGATAGCGATTGAAACACGACAATTAGCCGGAGGCGTCGTACTACATGCCTTCCCGGAAGGGAAACGCGCCGTGCCGCTTCCCTGTGTGGTGTTCTATCATGGCTTCACCTCCTCCAGCCTGGTTTATAGTTATTTTGCCGTTGCCCTGGCACAGGCAGGATTCCGGGTAGTCATGCCGGATGCGCCGGAGCATGGCGCTCGCTTCGGCGGCGACTCACAGGGACGAATACACCGATTCTGGCAGATTCTGCACCAAAACATGCAGGAATTTACGACGTTACGTGCGGCGATTCAGGCGGAAAACTGGCTACTTGACGGGCGGTTGGCGGTGGGCGGCGCATCCATGGGCGGTATGACGGCGCTGGGCATTATGACGCGTCACCGAGAGGTAAAATGC…	ATG	TAA
SL1344_4508	GTGGCTCAATTCGTTTATACCATGCATCGTGTCGGCAAAGTGGTTCCGCCGAAACGTCATATTCTGAAAAACATCTCGCTGAGCTTCTTCCCTGGCGCCAAAATCGGCGTGCTGGGCCTTAACGGCGCCGGTAAGTCTACCCTGCTGCGCATCATGGCGGGGCTCGATAAAGATATCGAGGGCGAAGCGCGCCCGCAGCCCGGCATTAAGATTGGCTACCTGCCGCAGGAACCTCAGCTAAACCCGGAACACACGGTACGCGAGTCGATTGAAGAGGCCGTTTCGGAAGTGGTTAACGCCCTCAAACGTCTGGATGAAGTGTACGCGCTGTATGCCGATCCGGATGCCGACTTCGACAAGCTGGCCGCAGAGCAGGGCCGACTTGAAGAGATTATCCAG…	GTG	TAA
SL1344_0674	ATGGAGCTTCGCCAGTTACGCTATTTCGTGCGTATTATTGAAACCGGCAGTATGGGCAGCGCCGCACAGGATCTTGATATTGGCGTTTCAGCATTAAGTCAACAGATGTCCCGTCTGGAAAACGAGCTCGCCATCCGTCTGCTGCAGCGCACTTCGCGCGGCGTAACGCCAACCAACGCCGGGCTGGCCTTTTATTCACAGGCGCAACTCGCCCTGCGTCATGCCGACGACGCGATTCTCGCCGCCAGAGAAGCGCGCCTTTCCGGTCATGTGAGCGTAGGAATGGCCCCCAGTACCGCCTCCATACTGGGTATACCGTTTATCCATGCCATGCAGGAAAACTATGCCGATGTCCGACTGCATGTGGTGGAAAGCTTGTCCGGTAATCTGGAAAGAATG…	ATG	TAA
topA	ATGGGTAAAGCTCTTGTCATCGTTGAGTCCCCGGCAAAAGCCAAAACGATCAACAAGTATCTGGGTAATGACTACGTGGTGAAATCCAGCGTGGGTCATATCCGTGATTTGCCGACCAGTGGCTCAGCAGCTAAAAAGAGCGCCGACTCTACCTCCACCAAAACGGCTAAAAAGCCCAAAAAGGATGAACGTGGCGCTCTCGTCAACCGTATGGGGGTTGACCCGTGGCACAACTGGGATGCGCACTATGAAGTGCTGCCCGGTAAAGAGAAGGTCGTCTCTGAACTGAAACAGTTGGCGGAAAAAGCCGACCACATCTATCTCGCAACCGACCTTGACCGCGAAGGGGAAGCCATTGCATGGCACCTGCGGGAAGTGATCGGCGGCGATGACGCGCGC…	ATG	TAA
cyoE	ATGATGTTTAAGCAATACCTGCAAGTAACGAAACCAGGCATCATCTTTGGCAACCTGATCTCGGTGATCGGGGGATTTCTGCTGGCCTCAAAGGGCAGCATTGACTATCCCCTGTTCATTTATACGCTGGTCGGGGTGTCACTGGTTGTGGCGTCGGGTTGTGTATTTAACAACTACATCGACAGGGATATCGACAGGAAGATGGAAAGGACCAAGAATCGGGTGCTGGTCAAAGGCCTGATTTCTCCTGGCGTCTCGCTGGTATACGCCACCCTGCTGGGTATTGCTGGCTTTATGCTGTTGTGGTTTGGCGCCAATCCTCTGGCCTGCTGGCTGGGGGTAATGGGCTTCGTGGTCTACGTTGGCGTGTACAGCTTGTACATGAAGCGTCACTCCGTC…	ATG	TAA
SL1344_1406	ATGGGACTCGTGATTAAAGCTGCCCTGGGGGCGCTGGTCGTCGTATTGATTGGTCTGCTGTCAAAAACGAAAAATTATTATATCGCCGGATTAATTCCTCTGTTTCCAACGTTTGCGCTTATCGCGCACTATATCGTGGCCAGCGAGCGGGGCATCGACGCGATGCGTACCACCATCGTCTTTAGTATGTGGTCGATCATTCCTTATTTCATTTATCTTGCAACGCTATGGTATTTCAGCGGCGTGATGCGCCTGCCCGTCGCGCTTGGCGGTGCGGTGGTCTGCTGGGGGCTAAGCGCGTGGCTGCTGATTTTTTGCTGGATTAAATGGCATTAA	ATG	TAA
SL1344_2569	TTGCTGCTTGAACCCGCCTATGCGCGGGTTTTCTTTTGCGCGCTGGGCAGGGAGTCAGGCATTAACAGCCTGCACATTCCCGGTAATAACGAAAGTCTGGATCAGTCGGATATGGCACTGGTCACAGGCGATTTTATGGCGACCGGAAAGCCGCAGGCACGTTTTTATCAGGTAGTGAACGGTATTGCGGTATTACCCGTGACCGGAACACTGGTTCATAAACTCGGCGGAATGCGTCCCTTTTCAGGGATGACCGGATATGACGGTGTCACTGCCCGGCTACAACAGGCGGTTTCAGATCCGGAGGTAAAAGGCATTCTGCTGGATATTGACAGTCCCGGCGGTCAGGCTGCCGGGGCGTTTGACTGTGCTGACATGATTTACCGGATGCGCGAACAG…	TTG	TGA
cbiP	ATGACGCAGGCAGTTATGTTGCAGGGGACGGCATCCGACGTCGGCAAAAGTGTGCTGGCGGCGGGTTTATGCCGCATTTTTTATCAGGATGGTCTGCGTACCGCGCCGTTTAAATCGCAAAATATGGCGCTTAATTCTGGTATTACGCCGGATGGTAAAGAGATGGGGCGGGCGCAAATTTTTCAGGCGGAAGCCGCGGGGATCACGCCAGATGTGCGTATGAACCCGGTGCTGCTCAAACCGACCAGCGATCGCCAGGCGCAGGTCGTGCTGATGGGGAAAGTGGCGACCAATATGGATGCGGTTAGTTACCATGACTATAAACCGCGTTTGCGTGAGCAAATCCTTGCGGTCTATAACAGCCTGGCGCAGGAATATGACGTTATTGTGCTGGAAGGC…	ATG	TGA
nlpB	ATGGCTTACTCAGTACAAAAGTCGCGCCTGGCGAAGGTTGCGGGTGTTTCGCTTGTTTTGCTGCTCGCTGCCTGTAGTTCCGATTCGCGCTACAAGCGCCAGGTAAGCGGCGATGAATCCTATCTGGATGCCGCGCCGCTTGCTGAACTTCACGCCCCGGCAGGAATGATCCTGCCGATAACGACCGGCGACTACGTTATTCCGGTCACGAAGGGGAGCGGCGCGGTTGGTAAGGCGTTGGATATCCGTCCGCCGGCGCAGCCGTTAGCGTTAGTGAGCGGCGCGCGTACCCAGTTCTCTGGCGATACCGCTACGCTATTGGTGGAAAATGGCCGGAGCAGCACGCTGTGGCCGCAAGTCGTCAGCGTGATTCAGGCGAAAAATTATCCGATTGAAAAA…	ATG	TAA
SL1344_4462	ATGTTTGATACTTTAGGTCAGGCAAAAAAATATCTCGGCCAGGCGGCAAAAATGTTGATTGGTATTCCGGACTACGACAACTATGTCGAGCACATGAAAACCAACCATCCCGACAAGCCGTACATGACCTATGAAGAGTTCTTCCGCGAACGTCAGCAAGCACGTTACGGCGGCGATGGCAAAGGCGGTATGCGCTGTTGTTAA	ATG	TAA
SL1344_2729	ATGAAACGCGCGCCCTTTCTCTGTAAGCAGTCTCCGGACCGCACGCTCGAAGTGGTGATCCTTGCCGGAAGCCTGGCATGGGAAACCTCACGCGTGTGGCGAAAAGATCCCGACCGGGAAGATGATGTTCCTCCGATGGTACTCGGCCCGAATGAACTGGCCGATCTGAGCAATCTGACCATTATCAGGCCCGACACGCTCTACGTCCGGGTACTTCGCACCGGCGATATCAGTGAAGAAGATCTGCTGAAAATTGCCGTAAAACTGGCGCACGCGGGTGTGCAGATGGCCCGGCTGATGAGCCCTGACGGTGAGTTACTGGAGAACTGGACCGGGCAGCTTGAACGCCTGCGACAGGAAAGGCCTTCCGATATCCTGCCGGATCACTTCCGCCTCGAT…	ATG	TGA
SL1344_3194	GTGCGCGCCTTAATCGCCGAGCAGCGCCTGGGAGCAGTGCTGGAAAAACGTTATCCCGGCGCGCATGATTACGCCACTGACAAAGCGCTATATCACTATACTCAGGAACTGAAAAGTCAGTTTCTGCGCAATGCGCCGCCCATTAATAAAGTGATGTATGACAGCAAGATCCATGTGCTGAAAAATGCGCTGGGACTGCATACCGCTGTCTCGCGCGTTCAGGGCGGCAAGCTCAAGGCAAAGGCGGAGATCCGCGTCGCCACCGTGTTTCGTAACGCCCCGGAGCCATTCTTACGGATGATTGTGGTTCACGAGCTGGCGCACCTGAAAGAGAAAGATCATAACAAAGCGTTTTATCAGCTCTGCTGCCATATGGAGCCGCAGTACCATCAACTGGAG…	GTG	TAA
SL1344_1020	ATGACTGAATCTACATTTCCGCAATATCCCCGTTTAGTCCTCAGCAAAGGGCGAGAAAAATCTTTACTCCGCCGCCACCCATGGGTCTTTTCCGGCGCCGTATCCCGTCTGGAAGGCAAAGCCAACCTCGGTGAAACTATCGATATCGTCGACCATCAGGGAAAGTGGTTAGCACGCGGCGCCTGGTCACCAGCCTCCCAGATCCGCGCGCGCGTCTGGACATTTGATAAAGCAGAATCCATTGATATTGCGTTTTTCACCCGCCGCCTGCGCCAGGCGCAGCAGTGGCGCGACTGGCTGGCGAAAAAAGACGGCCTGGATAGCTATCGTCTGATCGCCGGTGAGTCCGATGGCCTGCCTGGCGTCACTATCGATCGTTTTGGTCATTTTTTGGTGCTG…	ATG	TAA
SL1344_2221	GTGTATATGAAGAGAATATTTATATATCTATTATTACCTTGTGCATTCGCATGTTCTGCTAATGATAATGTTTTTTTTGGCAAGGGCAACAAGCATCAGATCTCTTTTGCTGCGGGAGAAAGTATAAGAAGAGGAGGGGTTGAGCACTTATATACGGCTTTTCTGACATACAGTGAACCCAGCGATTTTTTCTTTTTACAGGCAAGAAATAATCTGGAGTTAGGAGGATTTAAGGCTAAGGGTAGCGATGATTGCAGTAAACATTCTGGCAGCGTTCCCTGTAATAAATATAACCAGGGCGTATTGGGTATCTCGAAGGATGTGGCGCTGGTTCATTTCGCTGGTATCTATACCGGTATTGGTCTGGGGGCTTATATAAAATCTAAGTCGCGAGATGAT…	GTG	TGA
hemG	GTGAAAACATTGATTCTTTTCTCTACCCGGGACGGACAAACGCGCGAAATTGCCTCTTATCTGGCTTCTGAACTCAAAGATATGGGGATCTGGGCCGATGTCGTTAATCTGCATCGCGCAGAAGAGCCTGACTGGGATAGCTATGATCGCGTAGTGATTGGCGCGTCTATTCGTTATGGTCATTACCACAGCGCCTTTCAGGAGTTTGTTAAGAAATATGCCACGCGGTTGAACGGAATGCCGAGCGCCTTTTATTCCGTTAACCTGGTGGCGCGTAAAGCTGAAAAACGGACGCCGCAGACTAACAGCTACGCGCGGAAGTTTTTAATGAGCTCTCCGTGGCGACCTGACTACTGTGCCGTCATTGCAGGCGCGCTTCGCTATCCCCGTTATCGCTGG…	GTG	TAA
fucK	ATGAAACAAGACGTTATCCTGGTTCTCGACTGCGGTGCGACAAACGTTCGGGCGATCGCCGTTGATCGCCAGGGGAAAATTGTCGCCCGCGCCTCAACCGCTAACGCCAGCGACATTGCCGCAGAAAATAGCGCCTGGCATCAGTGGTCGCTGGACGCCATCCTGCAACGTTTCGCCGATTGTTGCAGGTCACTCTCCAGCGCCCTGTCGGAGTGTGTTGTTCGCGGTATTACGGTGACTACGTTCGGCGTCGATGGCGCGCTGGTCGATGCGCAGGGCAAGCTGCTCTACCCGGTCATCAGTTGGAAATGCCCGCGAACCGCTGCCGTGATGGAAACGATTGAGCGCTTTATCTCGCCCCGGCAATTGCAGACGCTCTCCGGCGTCGGCGCGTTCAGC…	ATG	TGA
yjfO	ATGATTATCAGGAAACGAGATAGAGTTATGCGTCGGTTTGCTTCATTGATAGCAGCGCTGTTATTAAGCGCGTGTAGCGTGCTGCAGGGTACGCCGCAACCTGCGCCGCCTGTCGCCGATCACCCGCAGGAAATCCGTCGCGATCAAACGCAAGGACTACAGCGGATGGGGACCGTAAGCGCGCTGGTTCGGGGCTCCCCGGATGATGCAATAGATGAAATCAGAGCGAAAGCCGTCGCTGCGAAAGCCGATTATTACGTTATCTTAATGGTTGATGAAACGGTTGTAACCGGCCAGTGGTATTCACAAGCCATTTTGTATCGTCAATAA	ATG	TAA
SL1344_0673	ATGGTTGATGTACTGGTGATAGGCGGAGGCAATGCCGCATTATGCGCCGCCCTGACCGCACGGGAAGCGGGCGCATCGGTTCTGCTGCTGGAGGCTGCCCCGCGGGAATGGCGCGGCGGAAATTCTCAGCACACACGAAACCTGCGCTGTATGCATGATGCGCCGCAGGATGTGCTGGTAGAAAGCTATCCTGAAGAGGAATTCTGGCAGGATCTGTGGCGAGTCACCGACGGCAACACCAACGAGGCGCTGGCGCGGCTGGTCATTCGCACCTCTTCGCAATGCCGCGACTGGATGCGCAAACATGGCGTTAACTTTCAACCGCCACTATCTGGGGCGCTCCACGTTGCGCGCACCAATGCGTTTTTTATGGGCGGCGGGAAAGCGCTCGTCAATGCC…	ATG	TGA
SL1344_4146	TTGGCCAACGACATTATTACCCAGCTTCAGGCGCGTAATGAGACGTTGACGCAGGCAATAGCCCGTTACGGCTCACTCAACGCCAGCACGCTGCACACGCTCAGCTTTGAGCAAACAAAAGTCACCCGGCTTACGCAACAGCTCGCTAACTCCGCCCTTCGCCGGGAAGAGAACGATAAACAGCGCGCCGGGTTGCTGGAAAAAACACAAACGTTCGCCGGACAGCTCGGCAAGCTCCTGAACGTTGAGACTCCCGACTGGAAGCTGCCTTACGAATTTCAGGGCAACATGGTCGATATGGCGGCGAAGGGCGGCATGGATAACACCGCGCGGGACGCCCTGAGCCTGAATATCCGCGACTGGAGCCTTGATTTCAATCAAGATCAAAAAGATCTGCAA…	TTG	TAA
cysB	ATGAAATTGCAGCAGCTTCGTTACATTGTTGAAGTGGTTAATCATAACCTTAACGTCTCCTCTACCGCTGAGGGGTTGTATACTTCCCAGCCGGGGATCAGCAAGCAGGTTCGGATGCTGGAAGATGAGCTTGGCATCCAGATTTTCGCCCGCAGTGGTAAGCATCTGACTCAGGTGACGCCCGCAGGTCAGGAGATTATTCGTATTGCGCGTGAGGTGCTTTCCAAAGTCGATGCCATTAAGTCGGTCGCCGGCGAGCACACCTGGCCGGATAAAGGCTCGCTCTATATTGCCACTACCCATACTCAGGCGCGTTATGCATTGCCAGGCGTGATTAAAGGCTTCATCGAGCGTTACCCGCGCGTTTCGCTGCATATGCACCAGGGGTCGCCAACGCAG…	ATG	TAA
SL1344_0432	GTGGATATTCCGCAAGCAATAAAGTACTACGAGCAGGCTTGTGATTTGGACGGTGATTATGGTTGCTTTAATGCGGCTTATTTCTATGAATATGGCATCGGTACCCAAAAGGACATTACGCAAGCGAAAACATTAGCAAAACAGCTTAGAGAAAAAATTAATCTATCCAATATCAATCTCGATAAAAAGGTGAGTGAACGTATAATTGGGAGTGTTTATAGTAATAAACTTGAGGCATATAGAGACCTTTCATTTCGTCCTCATTTTATTCAAGGCTTAAGTTTCTATTTTTATGCCCCGCAATCAGATGAGCGAAAACTGCTGAGTCGAATAGGTTTTGACTCATCACATCTTGCGCGGATAGCGATACTCTGGGCGAGAGAGGGTGATCCTGAGGTC…	GTG	TAA
SL1344_3548	ATGTACCAGGTCGTTCTGGGAAAAGTGTCAACATTAAGCGCAGGTCAATTGCCCGACGCGTTAATCGCTCAGGCGCCGCAGGGCGTTCGCCGGGCAAGCTGGCTGGCCGGGCGCGTGCTGCTTTCCCGTGCGCTCTCGCCGCTACCGGAGATGGTGTATGGCGAACAGGGTAAACCGGCTTTTTCCGCCGGAGCGCCGCTGTGGTTTAACCTCAGTCATAGCGGCGACACTATTGCTCTGTTGCTTAGCGACGAAGGTGAAGTCGGCTGCGATATTGAAGTGATCCGCCCGCGCGATAACTGGCGTTCGCTGGCAAATGCGGTATTCAGCCTCGGCGAACATGCTGAAATGGAAGCGGAACGTCCGGAGCAACAACTGGCGGCATTCTGGCGTATCTGG…	ATG	TGA
rstA	ATGAACCGCATTGTATTTGTTGAAGACGACGCTGAAGTGGGTTCTCTCATTGCCGCTTATCTGGCGAAACATGATATTGATGTCATTGTTGAGCCGCGTGGTGACCGGGCGGAGGATCTTATCCTCACCACTCAGCCCGATCTGGTTTTACTGGATATTATGCTTCCAGGTAAAGATGGCATGACGATATGTCGCGATTTACGCCACCGCTGGCAAGGCCCGATTGTCCTGCTCACCTCGCTGGACAGTGATATGAATCATATTCTGGCGCTGGAGATGGGCGCCTGCGACTACATCCTCAAAACCACGCCTCCGGCCGTTTTGCTGGCGCGTCTGCGCTTACACCTGCGGCAAAGCGAACAAACGCAACAGGCAAAAAGTCTTCAGGAGAGCGCGCTT…	ATG	TAA
stfG	ATGGCTAAAAGACAGGCGTTATTACACGGCGCGGCCTGCATCCTCTGTGGGGCGCTGATATTGCCGGTCTCAGCGGCAGATAACCTGCATTTTTCCGGTAGCCTGGTGGCCAGTCCTTGCACGCTCACGATGCAGGGGACGGGGATTGCCGAAGTCGATTTTTCGTCGCTTGACAGTTCTGATTTCACTCCCGACGGCCAGTCTGCTCGTAAGCCTTTGGTGTTTGAACTCACGGATTGCGATTCGGCGCTGAGTAACGGGGTGCAGGTGACTTTCACTGGAACCGAAGCGACCGGAATGCGCGGTATCCTGGCCATCGATAGCTATTCAGGCGCTTCCGGGATCGGGATTGGTATTGAAACGCTATCCGGCGTTCCCGTGGGCATGAACGATAAAGAG…	ATG	TAA
SL1344_2568	ATGTCATTTACCACCACTATTGAGAAACGTGCGGATAACCGCATTTTCGCCGGTAACGATCCGGCACATACCGCAACGGGAGTCAGCGGGATAACGGCGGCCACACCGATGCTGACGCCCCTGATGCTGGATGATACCACCGGGAAACTGGTGGCCTGGGACGGGCAGAAGGCCGGAACGGCGGTCGGGGTTCTGGCCCTTGAGCTGGACGGGTCGGAAAACCTGCTGACGTACTGGAAGAGCGGCACCTTTGCCACAGAATCACTGGCATGGCCGAAGAGTGTGGATGCCATTAAGCAGGCAAATGCATTCGCCGGAAGCGCCGTCAGTCACGCCGCTTTACCGTAA	ATG	TAA
envF	ATGAATAAAATACATGTTACATATAAAAATCTCTTACTTCCGATTACCTTCATCGCGGCAACTCTAATTAGCGCCTGTGATAACGATAAAGATGCCATGGCGGAAGCTGAAAAAAATCAAGAGAAATACATGCAAAAAATCCAGCAAAAAGAGCACCAGCAATCAATGTTCTTTTACGACAAAGCCGAAATGCAAAAAGCTATTGCCAATATCAACGCAAAAGGTGGAGCCAATCTTGCGATTATTGAAGTCCGTTTCTTCAAGGGCGGGTATTCATTCATTCGACAAAGCGTTAACACCCCTGCTAAAGTAGAGGTGTTTAAATTTAACAACGGCTACTGGGGGGGACCTTCGCCTGTCAATTTAACCATCTTTGGCACTATAACAGAGGAGCAAAAA…	ATG	TAG
SL1344_3484	ATGGCTGCAAATGCGCTTGTTCGTGCCCGTATCGACGAAACGCTGAAGGACCAGGCGGCAGATGTCCTGGCTGAAATGGGGTTAACCATTTCTGATTTGATACGGATTACACTGACTAAAGTTGCGCGTGAAAAGGCATTGCCTTTTGATTTGCGCATACCCAATGAGTTAACGTCCCGAACGATAGAAAATAGCGAAGCTGGCGTTGATATTCATAAAGCCAAAGATGCTGATGATTTGTTTGACCAGTTAGGGATCTGA	ATG	TGA
purC	ATGCAAAAGCAAGCTGAGTTGTATCGTGGTAAAGCGAAAACCGTATACAGCACGGAAAACCCGGACCTGTTGGTGCTCGAATTCCGCAATGATACGTCAGCAGGGGATGGCGCGCGCATTGAACAGTTTGATCGCAAGGGCATGGTAAATAACAAATTCAACCATTTCATTATGACCAAACTGGCCGAGGCGGGCATCCCGACCCAGATGGAACGTTTGCTGTCTGATACCGAGTGTCTGGTGAAGAAGCTGGAGATGGTGCCGGTTGAATGTGTGGTGCGCAACCGTGCGGCTGGGTCGCTGGTCAAGCGTCTGGGCGTGGAAGAAGGCATGGAGCTTAACCCGCCGATATTCGATCTGTTCCTGAAAAACGACGCGCTGCACGACCCGATGGTGAAT…	ATG	TAA
SL1344_3193	ATGAGCCACGTAGACGACGGTTTCCGTTCACTGACGCTGAAACGTTTTCCGCAAACGGATGATGTTAACCCGCTTCTGGCGTGGGAGGCGGCCGATGAGTATCTGCTGCAACAGTTGGATGAGACGGAAATTCGCGGCCCGGTGCTGATCCTGAATGATACGTTTGGCGCGCTAAGCTGTGCGCTGGCGGAGCATTCGCCATACAGTATTGGCGATTCGTATTTAAGCGAACTGGGTACGCGAGAGAATTTACGCCATAACGGCATCGCGGAGTCCAGCGTAACGTTTCTCGACAGTACCGCTGACTACCCGCAGGCGCCGGGCGTGGTATTGATTAAGGTACCGAAAACGCTGGCGTTGCTGGAACAGCAGTTACGCGCTTTGCGTAAGGTCGTTACG…	ATG	TAA
SL1344_1019	ATGATAGCCAGCAAATTCGGTATCGGCCAACAGGTCCGCCATTCCCTGTTAGGTTACCTCGGAGTGGTCGTCGATATCGACCCGGAATATTCGCTTGATGAGCCGTCGCCTGATGAACTGGCGGTTAACGACGAACTTCGCGCCGCTCCGTGGTACCACGTGGTAATGGAAGATGATGATGGTCAGCCAGTGCATACTTATCTGGCCGAGGCCCAGTTGCGAAGCGAAATGCGGGACGAGCATCCAGAACAGCCATCGATGGATGAACTGGCGCGTACCATTCGCAAGCAGCTTCAGGCGCCGCGACTACGTAACTGA	ATG	TGA
rplV	ATGGAAACTATCGCTAAACATCGCCATGCTCGTTCTTCTGCTCAGAAGGTTCGCCTTGTTGCTGACCTGATTCGCGGTAAGAAAGTGTCGCAGGCTCTGGATATTCTGACCTACACCAACAAGAAAGCGGCTGTACTGGTCAAGAAAGTTCTGGAATCTGCCATTGCTAACGCTGAACACAACGATGGCGCTGACATTGACGATCTGAAAGTTACGAAAATTTTCGTAGACGAAGGCCCGAGCATGAAGCGCATTATGCCGCGTGCAAAAGGTCGTGCAGATCGCATCCTGAAGCGCACCAGCCACATCACTGTGGTTGTGTCCGATCGCTGA	ATG	TGA
SL1344_2220	ATGCCTACAATTAAAAAGTTAGCTGATGCCAGAGACGTTATTTTGCATGAACTGATTTTGCATGAACTGATTGGACATCTTTCCTGTGCAGTGGTCACAGTAAAGTCAATGCAGGCAACTAACGTAAACCATGTTTGTACTAAAACAGAAAAAGCGCATCTACACCCTATACTGGAAAAAATGTTTGCAGTGGCAGGTAAATGA	ATG	TGA
trkH	ATGCATTTTCGCGCCATTACCCGAATCGTTGGACTACTGGTTATCTTATTTTCGGGGACAATGATTCTCCCGGGACTGGTAGCGCTAATATATCGTGATGGCGCAGGAAGAGCGTTCACGCAGACCTTTTTTGTCGCGCTGGCGATCGGTTCCATACTGTGGTGGCCGAACCGTAGGGAAAAGGGCGAGCTGAAATCCCGCGAAGGATTTCTTATCGTGGTGCTGTTCTGGACCGTGCTGGGCAGCGTGGGTGCGCTGCCGTTTATTTTCTCGGAAAGCCCAAACCTCACCATTACCGATGCTTTTTTTGAATCGTTCTCCGGGTTAACCACCACGGGCGCCACTACTCTGGTGGGGCTGGATTCATTACCGCACGCCATTCTCTTTTATCGTCAGATG…	ATG	TAA
fucI	ATGAAAAAAATCAGCTTACCGAAAATCGGTATCCGCCCGGTGATTGATGGACGTCGTATGGGCGTACGCGAGTCGCTCGAAGAGCAAACCATGAACATGGCGAAAGCGACGGCGGCGCTCATCACCGAGAAAATCCGCCACGCCTGCGGGGCTCAGGTGGAGTGCGTCATTGCGGATACCTGTATTGCCGGAATGGCGGAATCCGCCGCCTGTGAAGAAAAATTCAGTAGCCAGAACGTGGGCGTGACCATTACCGTTACGCCGTGCTGGTGCTATGGCAGCGAAACCATTGATATGGACCCGATGCGTCCGAAAGCCATCTGGGGCTTTAACGGCACAGAGCGTCCTGGGGCGGTTTACCTTGCCGCGGCGCTGGCGGCGCACAGCCAGAAAGGCATT…	ATG	TAA
SL1344_4311	ATGGAGCGTCCTGTTAAATGCGGGGTATGTAATAAGGAGCTGACGATGAAACAAGAACTTGCCTTATCCTCACTGCTGCTTTCTGCCGGACTGGTGAGTACGACGGCACAGTCTGCCGAATTCGCCAGTGCTGACTGCGTAACGGGTCTGAATGAAATCGGCCTGATCTCGGTCAGTAATGTTGCAGGAAACCCACAGGATGTAGAGCGGATTATCGCCCTGAAAGCCGATGAACAGGGTGCGTCCTGGTACAGAATTATTCAAATGTATGAAGAACAACAGTCGGATAACTGGCGCGTACAGGCGATACTCTATGCCTGA	ATG	TGA
nadR	ATGCGATTTTTCCAGCAGGAGGCTCTTGTGTCATCGTTCGACTATCTCAAAACCGCGATTAAGCAGCAAGGTTGCACTCTGCAACAGGTGGCTGACGCCAGCGGTATGACCAAGGGATATCTGAGTCAGTTACTTAACGCCAAAATCAAAAGCCCCAGCGCGCAAAAACTGGAGGCGCTACACCGTTTTCTCGGGCTGGAGTTTCCCCGCCGACAGAAAAACATTGGCGTGGTGTTCGGTAAATTTTATCCATTGCATACCGGACACATCTACTTGATCCAGCGCGCCTGTAGCCAGGTGGATGAGTTGCACATCATTATGGGATATGACGATACGCGCGACCGCGGGCTGTTTGAGGATAGCGCCATGTCGCAGCAGCCCACCGTGTCGGATCGCCTG…	ATG	TAA
citB	ATGAAACAGCTTGAAAAATTAATCATTGAGGCCACCGTGCTTACCGAACCGGAAGCCGAGGTCGAACGCGTCATGCAAGTGTGTAACGCGTGTCGCTACTGCGAAGGTTTTTGCGCGGTATTTCCGGCGATGACCCAGCGGCTCGAATTCGGTAAAGCCGATATTCATTATCTGGCGAATTTATGTCATAACTGCGGCGCCTGCCTGCACGCGTGCCAGTACGCGCCGCCCCATGAATTTGCCATTAACGTGCCGAAAGCGATGGCGCAAGCCCGCCTGGAGACGTATCAACAGTATGCCCAGCCCGCCGCTTTTGGCGCGTTATACCGTCGGGCGGGGATCACCGTCGCGCTGGCGCTGATAGTCGGTCTGACGCTCTTTTTATTACTGGCGATGGCG…	ATG	TGA
acnA	ATGTCGTCAACCCTACGAGAAGCCAGTAAGGATACATTGCAGGCCAAAGATAAAACGTATCATTACTACAGTCTGCCGCTGGCTGCCAAATCCCTGGGCGATATCGCCCGTTTGCCCAAATCACTTAAAGTGTTACTGGAAAACCTGTTGCGCTGGCAGGACGGCGAATCTGTGACTGATGAAGATATTCAGGCGCTGGCCGGTTGGCTTAAAAATGCCCATGCCGATCGTGAAATTGCCTGGCGGCCCGCCCGTGTCCTGATGCAGGACTTTACCGGCGTGCCTGCCGTTGTCGACCTGGCAGCGATGCGTGAAGCCGTTAAACGCCTCGGCGGCGATACGTCGAAAGTGAACCCGTTATCGCCGGTTGATCTGGTTATTGACCACTCTGTGACGGTC…	ATG	TAA
SL1344_0431	ATGGAAATTAAATTTTTATCATTATGTATTTTAGCGGGTGTTTTATTTGTTAGCCAGGTGAATGCTTCAGCGAACAACGGTAAAGATGATGTAAAATATGCTGCGCTTACCCAGAAGGATCTTGATGCTTTGCCTGTGGAAAAAAGAGCTTCGGTTCTGGATGAACTGGGGTTTATCCATGAATACGGCCTTAGTGTACCGATGAATCGCGAACGGGCGTTGCAGTATTACAAGCAGGCCTGTGAGCTTGGCGGTAACTACGGCTGTTATAATGTGAAGTATGCTTATCAGTATGGCGACGGAGTGGCGAAAGATAGCGCTCAGGCCAATAAGTATGCTAAGAAAATGAATCTGGATAATTTATTGATTGAGCAAGAATATATTGATAAGTTTTCGCAA…	ATG	TAA
SL1344_1404	ATGAAAAGAAAAGTATTGGCACTTGTCATCCCGGCTCTGCTGGCTGCTGGCGCAGCACACGCCGCTGAAATTTATAACAAAGACGGCAACAAACTGGACCTTTACGGGAAAGTAGACGGCCTGCACTATTTCTCTGATGACTCTTCTAAAGATGGCGATCAGACCTATATGCGTGTCGGCTTTAAAGGCGAAACACAGATTAACGACCAACTGACCGGTTACGGCCAGTGGGAATATAACGTTCAGGCTAACACTACCGAAGGCGAAGGTGCTAATTCCTGGACTCGTCTGGCATTCGCCGGCCTGAAATTCGGCGACTACGGCTCATTCGACTATGGTCGTAACTACGGCGTCCTGTACGACGTAGAAGGCTGGACCGATATGCTGCCTGAGTTCGGC…	ATG	TAA
SL1344_2567	ATGGGATTGTTTACCACCCGCCAGTTGCTGGGTTATACCGAGCAGAAAGTTAAATTTAACCCACTCTTCCTGAGCCTGTTTTTTCGCCGTACTGTGACATTTCCTACCCAGGAAGTCATGCTGGACAAAATTACCGGAAAAACACCGATTGCCGCTTATGTATCTCCGGTGGTTGGAGGGAAGGTTCTGCGTAACCGCGGCGGGGAAACGCGCGTACTGCGTCCGGGGTATGTCAAACCGAAGCATGAAGTTAACTATGCGCAGGTTGTTGAGCGTCTGCCGGGTGAAGACCCGGCCAGGCTTAACGATCCGGCCTACCGTCGTCTGCGCATTCTGACCGATAACCTGAAGCAGGAAGAGAAGGCCATCGTCCAGGTGGAGGAGATGCAGGCCGTCAGT…	ATG	TAA
cobU	ATGATGATTCTGGTGACGGGCGGGGCACGTAGTGGTAAAAGCCGTCATGCTGAAGCCTTAATTGGCGATGCGCCGCAGGTACTGTATATCGCCACCTCGCAGATTCTTGATGACGAGATGGCGGCGAGAATTCAGCATCATAAAGATGGCAGGCCGGCACACTGGCGGACCGCAGAATGCTGGCGGCATCTTGATACGTTGATTACCGCGGATCTTGCCCCTGACGACGCGATTTTGCTGGAATGTATTACCACCATGGTGACGAATCTGCTGTTTGCGCTGGGAGGCGAGAACGATCCCGAACAGTGGGATTACGCGGCGATGGAGCGCGCCATTGACGATGAAATTCAGATTTTAATTGCAGCCTGCCAGCGCTGCCCGGCGAAAGTGGTACTGGTG…	ATG	TGA
SL1344_4461	ATGACCCCGATTGCAGTTACCCTACTTACCGGTTTTCTTGGTGCCGGCAAAACCACCCTACTACGCCATATCCTCAACGAACAACATGGTTTTAAAATCGCCGTTATCGAAAACGAATTTGGCGAAGTCTCCGTTGACGATCAACTGATTGGCGATCGCGCCACACAGATCAAAACCCTGACTAACGGCTGCATCTGCTGTACCCGCTCCAACGAGCTGGAAGATGCGCTATTAGACCTGCTCGACAGCCGCGACCGCGGCGATATTGCTTTCGACCGCCTGGTGATTGAATGCACCGGCATGGCTGACCCCGGCCCGATTATTCAGACCTTTTTCTCCCATGACGTATTATGCGAACGCTACCTGTTAGACGGCGTGATTGCGCTGGTCGACGCGGTG…	ATG	TAA
SL1344_2449	ATGCGCTGGCAAGGGCGTCGTGAAAGCAACAATGTAGAGGACAGACGTAATCGGCCAGGCGGCCCCTCGCTGGGTGGCCCAGGCTTTCGTCTTCCGCGCGGAAAAGGCGGCATCATTCTGTTGGTGGTGGTGTTGGTCGCAGGGTACTATGGGGTGGATTTAACCGGTCTGTTGACCGGCCAGCCGGTTTCGCAGCAGCAGTCGACGCGTTCGATAAGCCCCAATGATGATGAAGCGGCAAAATTTACCTCGGTGATTCTGGCGACGACCGAAGATACCTGGGGTCAACTCTTTCAAAAAATGGGGCGCGGCTATCAGCAGCCAAAACTGGTGATGTACCGTGGTATGACGCGCACCGGCTGTGGTGCGGGTCAGTCCGTGATGGGGCCGTTTTACTGC…	ATG	TGA
SL1344_2728	ATGAAAATCCGTGCTGACAGTAACGATGCTTTTCCCGAAAGCGGCAACGTGCGTATGCGGCAGGTGGTCCAGTTTCTGGCGATGAGTGAATCATCGGTTTACCGCCTGATTAAAGACACCGACTTTCCCCGCCCCGTCCACCTCTCTTCCCGACTGGTGGTCTTCGATGCTGCGGAAATCCGTCAGTGGCAACAGCGCCGCACCGTCATCCGTTAA	ATG	TAA
fadH	ATGAGCTACCCGTCGCTGTTCGCCCCGCTCGATCTGGGCTTTACTACTCTCAGAAACCGTGTGCTGATGGGATCGATGCACACGGGTCTGGAGGAACATCCTGATGGCGCTGAGCGCCTGGCGGCATTTTATGCCGAGCGCGCGCGACACGGCGTAGCGTTAATCGTCACCGGCGGTATTGCGCCCGTTCCCTCCGGGGTCGTGATGACCGGCGGCGCGATGCTGAACGATGCCAGCCAGTTAACGCCTCACCGCGTGGTGACCGATGCCGTACATGCGCAAGGCGGTAAAATCGCGCTGCAAATTCTGCACACCGGGCGTTACAGCTATCAGCCGCACCTGGTCGCGCCGTCGGCAATTCAGGCGCCAATCAACCGCTTTATGCCGCATGAACTGACG…	ATG	TAA
SL1344_1018	ATGATGAAAGAGACCGATATTGCTGATGTTTTGACGTCCACTCGCACTATCGCGCTGGTAGGTGCGAGCGATAAACCCGATCGTCCAAGTTATCGGGTAATGAAATACCTGCTTGAACAGGGCTACCATGTGATTCCGGTTGCGCCAAAAGTCGCGGGTAAGACATTGCTGGGGCAACAGGGGTATGCCACGCTGGCGGACATTCCCGAAAAAGTCGATATGGTGGATGTTTTTCGCAACTCTGAAGCTGCATGGGGCGTCGCGCAGGAAGCTATCGCCATCGGCGCAAAAACGCTATGGCTACAGCTTGGCGTGATCAACGAACAGGCGGCGGTGCTGGCGCGGGATGCAGGCATGACCGTGGTGATGGATCGCTGCCCGGCGATTGAGATCCCTCGC…	ATG	TAA
SL1344_2218	TTGCCTGATACGGATGAAAACCGTCGCGCTGATATTCATGCTGCTGGCAGTTTAAAGACGGTAAAGTCGTTCAAAGGGTTTATTCGCCGGAAGAGCTGCGCAGGCAGGCAGAATCGAAAATTGAACGCCCGGGCGTTGATACCGGATGATCTGGTCATCGTGGAAAGCGACCCTGAAAAAATCGACACTTTAGCTGTAAAATGA	TTG	TGA
SL1344_3938	ATGGACAGTTGGTTAATCCCTGCAGCGCCGGTCACCGTTGTTGAAGAGATCAAAAAAAGCCGCTTTATTACGCTATTGGCGCATACCGATGGCGTAGACGCGGCGAAAGCGTTTGTTGAGTCAGTCAGAGCTGAGCATCCTGATGCGCGCCACCATTGTGTGGCGTGGGTGGCGGGTGCGCCGGACGACTCACAGCAACTGGGCTTTTCAGACGACGGCGAACCGGCGGGAACGGCAGGCAAGCCGATGCTTGCGCAATTGATGGGCAGCGGCGTCGGAGAAATTACTGCCGTCGTCGTGCGCTACTATAGTGGTATTCTGCTGGGTACGGGCGGGCTGGTAAAAGCCTATGGCGGCGGTGTGAATCAGGCATTACGTCAGCTTGCCACACAACGCAAG…	ATG	TAA
fucP	ATGGGAAACACAACAATACAAACACAGAGTTTTCGTGCTGTGGATGCAGAGCAAAGCAAAAGCAAGCGCTACATTATTCCATTCGCCTTACTTTGCTCGCTATTTTTTCTGTGGGCCGTCGCCAATAATCTGAATGACATTTTATTACCGCAGTTTCAACAAGCTTTTACGCTAACTAACTTTCAGGCCGGGCTTATTCAGTCAGCCTTTTATTTCGGTTATTTCGTCATTCCAATTCCCGCTGGGATTTTGATGAAAAAACTCAGTTATAAAGCAGGGATTATCACCGGACTTTTTTTGTATGCTGTTGGCGCCGCATTATTCTGGCCTGCCTCCGAGATAATGAATTACACATTGTTTTTAATTGGCCTGTTTATCATCGCCGCCGGTTTAGGCTGC…	ATG	TGA
aidB	ATGTCCTGGCAAACACATACCGTCTTTAATCAACCTGCTCCGCTCAATAACAGTAACTTATTCCTGTCTGATGGCGCGCTGTGTGAAGCGGTTTCCCGGGAAGGCGCGGGATGGGATAGCGATCTTCTCGCCAGCATTGGCCAACAACTGGGAACGGCAGAATCACTGGAACTGGGGCGTCTGGCGAACGCGCATCCTCCTGAGTTGCTGCGTTACGATCCCCAGGGACAGCGTTTGGATGACGTTCGCTTTCATCCCGCCTGGCACCTGTTGATGCAGGGGCTTTGCGCTAATCGGGTACATAACCTGGCCTGGGAGGAGGAGGCAAGGGCGGGAAGTTTTGTCGCCCGGGCGGCGCGTTTTGTATTACATGCTCAGGTAGAAGCGGGAACACTCTGT…	ATG	TAA
citA	ATGGCACAACACACACCTGCAACATCGCGCGCCGGCACGTTCGGCGCAATACTGCGCGTGACAAGCGGCAATTTCCTTGAACAGTTTGATTTTTTCTTGTTCGGATTTTACGCCACCTATATCGCCAGAACGTTTTTTCCGGCGGAAAGCGAATTTGCCTCATTAATGTTGACCTTTGCCGTCTTTGGCTCCGGTTTTTTAATGCGCCCCGTCGGCGCGATTGTGCTTGGCGCCTATATTGACAGAATCGGACGCCGTAAAGGGCTGATGGTGACACTGGCGATTATGGGCTGCGGTACGTTGCTCATCGCCCTCGTCCCCGGCTACCAAACGATCGGCCTGGCAGCGCCTGCGTTGGTGCTGTTGGGCCGGTTATTACAAGGATTTTCTGCGGGCGTT…	ATG	TGA
SL1344_4145	ATGTATGCCGTATTAGGCGAAATAGAATTTGACGTCGTCGCTTACTGGGACGAATTTGAAAGTACGATGGGCGTGGATTACACCAGCCATGCCCGTATTGAAGGGAAACCGGGCGTGCAATTTATCGGCGATAAGCTGGACAAAATCACCCTGAAATTCAACTTTCATAGTCAGTATTGCCAGCCGACCACCGAGCTGAACCGTCTGCGGGAAGCGATGACCGCGCACCAGGCGATGGCGCTGGTGTTCGGCAACGGCGATTATCGCGGCTGGTTCGTGATTACCGATCTGACCGCTACCCACCAACACACCGATCCTTACGGTAACGTCATTGCCCAGGGCGGCAGTTTGTCGCTACAGGAGTACACCGGCGATCCGAAGAGCCCGCTGCTGCCTCCG…	ATG	TAA
ribA	ATGCAGCTTAAACGTGTGGCAGAAGCCAAACTGCCAACCCCATTGGGTGACTTTCTGATGGTGGGATTTGAAGAACTGGCAACCGGACACGACCATGCCGCGCTGGTTTTTGGCGATATTTCAGGTAAAACGCCGGTACTGGCTCGCGTTCATTCCGAATGTCTTACCGGGGACGCGCTTTTTAGTCTGCGCTGTGATTGTGGTTTTCAACTGGAAGCCGCGCTGACGCATATTGCGGAAGAAGGACGCGGTATTCTGATTTACCACCGTCAGGAAGGCCGCAATATCGGCCTGCTTAATAAAATTCGCGCTTATGCGTTACAGGATCAAGGCTATGACACGGTGGAGGCCAATCATCAGCTCGGCTTTGCCGCCGATGAGCGTGATTTCACCCTTTGC…	ATG	TAA
SL1344_0430	ATGAACGATTATAAAATGACGCCAGGGGAGCTGCGCGCCACATGGGGTTTAGGGACCGTCTTTTCGTTGCGTATGCTGGGCATGTTTATGGTTCTACCAGTACTGACCACATACGGTATGGCGCTACAGGGCGCCAGCGAAGCATTAATCGGCATTGCGATCGGCATTTACGGGCTGGCGCAGGCTATCTTTCAAATTCCCTTTGGGCTGCTGTCCGACCGCATTGGCCGCAAACCGCTGATTGTCGGCGGACTGGCGGTATTTGTCGCGGGCAGCGTCATTGCCGCGCTCTCCCACTCAATCTGGGGCATTATTCTGGGGCGAGCGCTACAGGGGTCCGGCGCTATTGCCGCCGCCGTCATGGCGCTCCTGTCTGACCTCACCCGCGAGCAAAACCGT…	ATG	TGA
SL1344_1403	ATGCTAATGATCAGTCTCGTCCCGTCTCTGCTTTCCAGAACCGCGCTTCTCTTTCTGCTCACGGCCACAGGCGCAGCCACCGCCGCCCGCCCGGCAGCGGATATTATTTTGCATAACGGTAATATCATCACTCTGAATGATGCCCAGCCGCAGGCCAGCGCGCTGGCGATTTCCGGCTCGCGGATTGTGGCGATTGGCGATGATACGGCGACAAATGAATGGCGCGGCGACCATACCCGTACCATCGATTTACAGGGTAAAACCGTGATACCCGGCCTGACCGATACTCACATCCACGCCATTCGCGGCGGACAAACCTGGACATTCGAAACCTACTGGTACGACAGCCCTTCGCTTAAAGACGCGCTGGATAAATTACGCGCCGACGCTAACCGTCGT…	ATG	TGA
stfF	ATGAAAAAAATAGTTTTGACGATGTTAATGGGGGGCAGCCTTGCCGCACAGGCAGCCGATAATCTTAAGTTTCACGGCACATTAATTTCACCGCCGAATTGTACGATTAACAATGATCAGACGATCGACGTTAAGTTCGGTAACCTGCTGATTAATAAAATAGATGGTACGCGTTATGCGCAGAATGTTCCGTATGAGATCACCTGTGATTCAACGGTGCGCGATGAGACGATGGCGATGACCCTGACGCTAAGCGGTTCCGTGAGTGATTTTAATCCGGCGGCGGTAAACACCAGCGTGGCGGGGCTGGGGATTGAACTCAGGCAGAACGACCAACCCTTTACGTTGGGGTCCACCATTACGGTGAATGAACAATCGATACCTGTTCTGAAAGCCATA…	ATG	TAA
SL1344_2566	ATGGCAACAAAAGAAGAGAATATACAGCGTCTGCGGGAGCTTGCGACGCGGCTTGGTCGTGATCCGGATGTGTCCGGGAGCGCCGCTGAACTCAGCCAGCGTGTCATGGAATGGGAAGAGGAAGCGGAGGCGGAGCATTTGCCTGCTGTGGAAAATGACAGTGATGAATCCATAGTGCCGCCCGGGATCGGGCAAAGATCCGAACGGGTACTTATCAGGGCGCTTCGTACACTACACATCTGCGCCATCGATCCGGACAGTAACCGGGAACTGGATATGGTTATGGCGGGAAACCCGGCGCGTATTTCGCAACACGATGTGGACGAGCTGATTGCTGCAGGACTTATTATTGAACTGTAA	ATG	TAA
SL1344_1177	ATGCTCAAACCTATCTGCCATAGTGGAAGTATAAAGGTTCCGGAATATCTGGAAACAGATAAGGAAAAAAATGCCGGACGTACTCCACTGTCTTCAGACATTCAGCAAGTTAGAAATGTTGTTGAAGATGTTCCGCTATTTCCAGAAAGCAGAACGGCGAGAGGTTCTGTAAGCGCAGCGTACAGGCTTTCTTTTGACGAAGTGTTTTGCGGTCTCAGCAATGAAGAGCGTAAAAAGGTGTATGGTCGCCTTTTTGGAAAACAAGTACTTGCGCATATTCATTCCAGGTGTCAGCGCGACGCTGACATAATAAGAGAAAAAGCGCTCAGGCGGATAAGCCGTGAGTGTGGTGCCGAAATAGATTGCGCTCTCTTACTAAATAAGATGGTGGATATTTTA…	ATG	TGA
SL1344_2448	ATGTCTGATATCGATGCGCTACAGGCGTTAACGTCGCAAATGACACAGGAAGGCATTCGCCGTTTACTGGTCATCAGCGGCGATGCGGCGTGGTGCCGGAAGCGGGCCGAGGCGATACGCGCTGCATTGCCCGGTGACTGGCTGTGGGTCGCGCCTGACGCGCCCGCCCAGCCGTGCTGTACGCCACAGGCGTTACAAACGCTGCTGGGCCGTGAATTCCGTCATGCGATATTTGATGCCTGGCAGGGCTTTGACGCCGCAGCGTTTGCCGCCCTGAGCGGGACCTTGCAGGCCGGAAGCTGGCTGCTTCTGCTGATGCCGCCGTACGAGACGTGGGAAAGCAGGCCTGATACCGATTCACTGCGCTGGAGCGACTGCGCGCAGCCTATCCCCACACCG…	ATG	TAG
SL1344_3191	ATGAAAGCACTAAACCGAGAGGTCATTGACTACTTTAAAGAGCATGTAAATCCAGGATTTCTGGAATACCGGAAATCTGTTACCGCCGGCGGGGATTACGGAGCCGTAGAGTGGCAAGCGGGCAGTTTGAATACGCTTGTCGACACCCAGGGGCAGGAGTTTATCGACTGTCTTGGGGGGTTTGGCATCTTTAACGTGGGGCACCGTAATCCTGTTGTGGTATCCGCCGTCCAGAATCAACTCACAAAACAACCTCTCCACAGCCAGGAGTTACTTGATCCCTTGCGGGCGATGCTGGCAAAAACGCTGGCGGCGCTGACACCGGGGAAACTCAAGTACAGCTTTTTCTGTAACAGCGGCACCGAATCCGTCGAAGCGGCGCTAAAACTGGCAAAAGCG…	ATG	TAA
SL1344_1017	ATGAAAACCGGCGCGCTAGCCACCTTCCTTGCTCTCTGTTTGCCGGTGACTGTTTTTGCCACAACGCTCCGTTTGTCTAATGAGGTTGATCTGCTGGTGCTGGACGGCAAAAAGGTGTCCAGCTCTTTATTACGCGGCGCAGAGAGCATTGAACTGGAAAACGGGCCGCATCAACTCGTTTTCCGGGTGGAAAAAACCATCCGCCTGCCCGGTAATGAAGAGCGGCTTTATATTTCTCCGCCGCTGGTGATAAGTTTCGATACCCAACTGATAAGTCAGGTCAATTTCCAGCTCCCGCGGCTGGAAAACGAGCGCGAAGCCTCGCATTTTAACGCGGCGCCGCGTCTGGCGCTTTTGGACGGCGACGCCATGCCCATTCCGGTAAAACTCGATATTCTG…	ATG	TGA
sspH2	ATGCCCTTTCATATTGGAAGCGGATGTCTTCCCGCCACCATCAGTAATCGCCGCATTTATCGTATTGCCTGGTCTGATACCCCCCCTGAAATGAGTTCCTGGGAAAAAATGAAGGAATTTTTTTGCTCAACGCACCAGACTGAAGCGCTGGAGTGCATCTGGACGATTTGTCACCCGCCGGCCGGAACGACGCGGGAGGATGTGATCAACAGATTTGAACTGCTCAGGACGCTCGCGTATGCCGGATGGGAGGAAAGCATTCATTCCGGCCAGCACGGGGAAAATTACTTCTGTATTCTGGATGAAGACAGTCAGGAGATATTGTCAGTCACCCTTGATGATGCCGGGAACTATACCGTAAATTGCCAGGGGTACAGTGAAACACATCGCCTCACCCTG…	ATG	TGA
pepQ	ATGGAATCACTGGCCGCGCTCTATAAAAATCATATTGTTACCTTACAAGAACGGACGCGCGATGTTCTGGCGCGCTTTAAGCTGGATGCGTTACTTATTCATTCTGGCGAGCTTTTCAACGTCTTTCTCGACGATCACCCTTATCCGTTTAAGGTCAATCCACAGTTTAAAGCGTGGGTGCCGGTAACTCAGGTTCCAAATTGCTGGCTGTTGGTCGATGGCGTCAACAAACCCAAATTGTGGTTTTATCTGCCGGTCGATTACTGGCATAACGTTGAACCGCTGCCAACGTCCTTCTGGACAGAAGAAGTCGAGGTCGTCGCCTTACCGAAAGCGGATGGCATCGGCAGCCAACTGCCTGCCGCGCGTGGCAATATCGGCTATATCGGCCCGGTTCCT…	ATG	TAA
fucA	ATGGAACGAAATAGACTGGCGCGGCAGATTATTGATACCTGTCTGGAAATGACGCGGTTAGGGTTAAATCAGGGGACGGCAGGTAACGTGAGCGTACGTTATCAGGGCGGATTGCTGATTACGCCGACGGGGATCCCCTACGAGAAGCTGACAGAGTCGCACATTGTCTTTATTGATGCTGACGGTCAGCATGAGCAGGGCAAGCTGCCTTCCAGCGAGTGGCGTTTTCATATGGCGGCATACCAGACGCGCCCTGACGCCAATGCCGTGGTACATAACCACGCTGTCCATTGTACGGCAGTCTCGATCCTGAATCGCCCGATTCCGGCGATTCACTACATGATTGCCGCCGCAGGAGGAAACTCTATTCCCTGCGCGCCCTACGCCACTTTTGGCACC…	ATG	TGA
SL1344_4309	ATGCTACGACACAACGTACCGATACGTCGGGATCTGGATAAGATCGCCTGCGATCACGGTTTTGACTTTCATGTTATCGATAACGAAATTTACTGGGATGAAAGCCGGGCCTACCGTTTTACATTACGGCAAATTGAAGAACAGATCGAAAAACCGACCGCAGAGCTTCATCAGATGTGTCTGGAGATTGTCGAGCGGGCCGTCCGGGATGAGCAGAGCATGCAGCAGCTGGCGATCCCGCCATTGTACTGGGATGTCATCGCCGAAAGTTGGCGCAGCCGCGATCCTTCGCTTTACGGGCGGATGGATTTCGTCTGGTGCGGCAAAGATCCGGTTAAATTGCTGGAATACAATGCGGATACGCCGACGTCGCTCTATGAGTCCTCCTACTTTCAATGG…	ATG	TAA
radA	GTGGCAAAAGCTCCCAAACGCGCCTTTGTTTGTAATGAATGTGGTGCCGATTACCCACGCTGGCAGGGGCAATGCAGCGCCTGCCATGCCTGGAACACCATTACCGAGGTGCGCCTTGCCGCGTCGCCGACGGTGGCGCGTAACGAACGTCTGAGCGGATACGCCGGCAGTGCGGGCGTATCAAAAGTGCAGAAACTGTCTGACATCAGTCTTGAGGAACTGCCGCGCTTTTCTACCGGTTTTAAAGAGTTTGACCGCGTGCTGGGCGGCGGGGTGGTACCCGGCAGCGCCATTTTGATTGGCGGTAACCCCGGCGCGGGCAAATCAACGTTGCTGCTGCAAACGCTGTGCAAGCTCGCCGAGCAGATGAAAACGCTGTACGTCACCGGCGAAGAGTCG…	GTG	TAA
SL1344_0670	ATGAAAAAAATTTTACTCATCGCCAGCATGACCGCCGGTTTGACGGCCTGCGCGTCATCACCCGCGCCGGAAGAAGATAGCCGGCTGAAAGAGGCGTACAGCGCCTGTATCAATACCGCACAGGGCTCGCCTGAGAAGATAGAGGCCTGCCAAAGCGTGCTGAATGTCCTTAAAAAAGAGCGCAGACATCAGCAATTTGCTAACGAAGAAAGCGTGCGGGTACTGGACTATCAGCAGTGCATTCAGGCGACGCGCACGGGTAACGATCAGGCGGTCAAGGCTGACTGCGATAAGGTCTGGCAGGAAATTCGCAGTCATAATAACGTGCAATAA	ATG	TAA
pgpB	ATGCTTTCAATTGCGAGGCGCACCGCGGCAGGCGCCGCCCTGTTGCTTATCATGCCGCTTGCCGTATGGGTATCAGGCTGGCAGTGGCAGCCAGGACATCAGGTCTGGTGGCTAAAAACGCTATTCTGGATAACGGAAACCGTGACCAAACCCTGGGGCGTTATCACGCATGTGATTCTTTGTGGATGGTTCTTATGGTGCCTGCGATTTCGCCTGCGCGCCGCCATTATGCTGTTTGCGATTCTCGGTGGGGCGATTATCGTCGGGCAGGGCGTGAAGTCATGGGTAAAGGAGCGCGTACAGGAGCCGCGGCCATTTGTGGTCTGGCTTGAAAAAACGCACCATATTCCCGTCGATGAGTTCTACACTTTAAAGCGTACAGAACGCGGACATTTAGTG…	ATG	TGA
SL1344_0429	ATGAAGGGAGAAGAAAAGATGCCATCTTTCGATATTGTTTCTGAAGTTGATCTGCAGGAAGCGCGTAACGGTGTGGATAACGCGGTTCGCGAGGTTGAGTCTCGTTTTGACTTCCGTGGCGTAGAGGCGACTATTGAACTGAACGATGCCAATAAAACCATCAAGGTGCTGAGCGAGTCCGATTTCCAGGTCAATCAGTTGCTCGATATTCTGCGCGCCAAGCTGCTTAAACGCGGTATTGAAGGCGCTTCGCTGGATGTACCGGACGAGTTCGTGCATAGCGGTAAAACCTGGTATGTGGAAGCGAAGCTGAAGCAGGGCATTGAAAGCGCCGTGCAGAAGAAAATCGTCAAGCTGATTAAAGACAGCAAACTGAAGGTGCAGGCGCAAATTCAGGGG…	ATG	TAA
rstB	ATGAAAAAGCTGTTTGTGCAGTTTTACCTTTTGCTGTTCGTCTGTTTTCTGGTCATGACCTTATTGGTCGGACTGGTGTACAAATTCACCGCCGAACGCGCGGGCAGGCAATCGCTCGACGATCTGATGAAAAGTTCGCTCTATCTGATGCGCAGCGAACTGCGGGAAATTCCGCCGCGTGAATGGGGGAAAACGTTAAAAGAGATGGACCTGAACCTCTCTTTCGATTTACGCGTTGAACCGTTAAATCACTATAAGCTTGATGCCGCCACCACGCAGCGACTGCGTGAAGGCGATATTGTCGCGCTTGACGATCAATACACCTTTATTCAGCGTATCCCGCGCAGCCATTACGTCCTGGCGGTTGGCCCGGTTCCCTATCTCTATTTCCTGCATCAA…	ATG	TGA
SL1344_2565	ATGTCGCAGTCCGAAAACCTGTTTGATACCGCGATTTCTCAGGCTGATGATGCCATCCTCCGGGTGATGGGAACGGTAGCAACAATAACCTCCGGCGTTCTGGCAGGGGCCACGCTTACGGGCGTATTTGACGATCCTGAAAGTGTGTCGTATGCCGCCGGAGGTGTCCGGATTGAGGGAGACAAGCCTACATTTTTTGTCAAAACATCCCTGACAGTCCATCTGAAGCGCCCGGACACACTAACCATTCTCGGTGACACCTTCTGGGTGGATCGCATCACTCCGGCTGGTGGAGACAGCAGTATTATTCTGCTGGGCAGGGGGACGCCGCCGACGGATAACCGGCGCAGGACGGGAGGAATGTTTGACTGCTCCCCGGCCTAA	ATG	TAA
SL1344_4460	ATGAGCATGGTTAAACATAAACGCGGCAACGCATCCGCGCTGAGTGCTCAGCATGAGGCTGAACTGAAGGCGCTGGCGAAAAAATCAGATGATGAGATTGATTACAGCGACATTCCCGCTTCGGAGGATGGGCAGTGGTCTGAAGCAGTGCGTGGTAAGTTTTTTCGCCCGTTAAAAACTCAGGCCTCGGTGCGTATTGACGCCGATGTGATGGAGTGGCTGAAACGGCCAGGAAAAGGCTACCAGACGCGGCTCAATGCCATTCTGCGCGAGGCGATGCTGCGCGAGCAAAATAAGAAATAG	ATG	TAG
cobS	ATGAGTAAGCTGTTTTGGGCCATGCTCGCTTTTATTAGCCGCTTGCCCGTGCCGTCACGCTGGTCGCAGGGACTGGATTTCGAGCAGTATTCGCGTGGGATCGTGATGTTTCCCTTTATCGGGTTGATTCTGGGGGGCGTAAGCGGCCTGATTTTCATCCTCCTGCAACCCTGGTGTGGTATTCCGCTAGCGGCGTTGTTCTGTATTCTGGCGCTGGCGCTGCTGACCGGTGGTTTTCACCTGGATGGGCTGGCCGATACCTGCGATGGCATTTTTTCCGCGCGCCGCCGTGAGCGAATGCTGGAGATTATGCGTGATAGTCGTCTGGGAACCCATGGCGGGCTGGCGCTTATTTTTGTGCTACTGGCAAAAATTCTGGTGGTCAGCGAACTGGCGTTA…	ATG	TGA
SL1344_2447	ATGGACTGGCTGGCAAAATATTGGTGGATTCTGGTATTGGTGTTTCTGGTAGGCGTACTGCTGAATGTGATCAAAGATCTCAAACGCATCGACCATAAGAAATTCCTTGCCAATAAACCTGAGCTGCCCCCGCATCGCGATTTTAACGATAAGTGGGACGATGAAGACGACTGGCCGAAGAAAGATCAGCCGAAAAAGTAA	ATG	TAA
aer	ATGTCTTCTCATCCCTACGTCAGCCAGCTAAATACCCCGCTGGATGATGATACCACTCTGATGTCTACGACCGACCTGGAAAGCTATATCACTCACGCCAATGACACTTTTGTCCAAGTGAGCGGCTATCAGTTAAACGAGTTACTGGCGCAGCCACATAATCTGGTGCGTCATCCGGATATGCCGAAAGCTGCCTTCGCAGATATGTGGTACACCCTAAAACAGGGCGAACCGTGGAGCGGCATTGTGAAAAACCGGCGTAAAAACGGCGACCATTATTGGGTGCGGGCCAACGCGGTACCGATGATACGTGAAGGGCGTGTGACTGGATATATGTCGATCCGTACCCGCGCCACGGATGATGAGGTTGCCGCCGTCGAGCCTTTATATCAGGCGCTA…	ATG	TAA
SL1344_2727	ATGCAAGGTTTGACTATGGATGATATCTCATTATCTATTGCTAGAAACATGTTTCATCTCCAAGTCTATGAGTCTGACGGAGTTCGCTTTGAGGACTTGTTTTCAAAAATAATGTACTATAAGTCGCCAGATTTTCAGCAGGTGAAGCCTTATGGAAATATTGGAGACAGAAAGAATGATGGTTTTATTAAGGGGCAGGGGGTATATTATCAGGTGTATGCACCAGAAGATGCATCTAATAATGTACTAGCTGCTGTTAATAAAATAAAAGATGATTTTGAAGGGTTAAGGGATTACTGGCATGATATATGTCCTATTAAAAAATATTACTTTGTCTTAAATGATAAATATAAGGGTTCCTTACCGCAGTTGCACAAGGAATTAATTGTTTTGCAAAGT…	ATG	TAA
mgsA	ATGGAACTGACGACTCGCACCTTGCCGACGCGCAAACATATCGCGTTGGTTGCTCACGACCACTGCAAACAGATGTTAATGAACTGGGTGGAACGCCATCAGCCGTTGCTGGAAAAACACGTTCTTTATGCAACCGGCACCACGGGGAATCTGATCCAGCGCGCAACCGGTATGGACGTTAATGCGATGCTGAGCGGCCCGATGGGCGGCGACCAGCAGGTTGGCGCACTCATTTCAGAAGGGAAAATCGACGTGTTGATTTTCTTCTGGGACCCGCTTAACGCGGTACCGCACGACCCCGATGTCAAAGCGCTACTGCGTCTGGCCACCGTATGGAATATCCCTGTCGCCACTAACGTCTCAACGGCGGACTTTATCATCCAGTCCCCGCATTTTAAT…	ATG	TAA
SL1344_2216	GTGAGAGCGTTACTGACCCCTGAAATTGCTCCTCGTATGGGCGTTGTATTGTTCAGGCCGGGATCGGAACTGATGCCCCTGTTTATGCAGGGGCGTGTTCTGCTTGAACCAGAGCCGGAGCAATTTTCATCTTTCGCCAGCGGCGCGGTCCCGGCGGTATCACAGCCGCTGGCGGATGATCCTGCTGTTCGTGATGTGTTCTGTAATGAGTCGGTTATCTATCGTGCTGGTGGTCTGGATAGTCTGGAAAGCTGGCTACTCCGGGGGAATGGCTGTCAGTGGCCGCATTCAGACTGGCACAGCGAACAGATGACAACCATGCGCCACGCTCCGGGGGCAATCCGACTGTGCTGGCACTGCGATAACCTGCTGCGCGAACAGTTTACGGAACGGCTGAAA…	GTG	TGA
fadB	ATGCTTTATAAAGGCGACACCCTGTACCTCGACTGGCTGGAAGATGGCATCGCCGAACTGGTGTTCGATGCTCCAGGCTCGGTCAATAAACTCGACACCGCAACCGTCGCCAGCCTCGGCCAGGCGCTTGAGGTGCTGGAAAAGCAACACGATTTAAAAGGGCTGCTGCTGCGCTCTAATAAAGCGGCCTTTATTGTCGGCGCGGACATCACCGAATTTCTTTCACTGTTCCTCGTCCCCGAAGAGCAGTTAAGCCAATGGCTGCATTTCGCTAATAGCGTCTTTAACCGTCTGGAAGATTTACCCGTACCGACCCTTGCCGCCGTAAACGGCTATGCGCTGGGCGGCGGGTGCGAATGCGTGCTGGCCACCGATTACCGTCTGGCGACGCCAGACCTC…	ATG	TAA
fucO	ATGGCGAACAGAATGATTCTGAATGAAACGGCATGGTTTGGCCGGGGAGCGGTGGACGCATTAACCGATGAGGTGACGCGCCGCGGTTATCATAAAGCGCTGATTGTTACCGATAAAACGCTGGTGCAATGCGGTGTGGTCGATAAAGTGACAAGCAGAATGGATGCCGCAGGGCTGGCGTGGGAGATCTATGCGGGCGTGATCCCTAATCCTACGATTTCCGTTGTCCAGGAAGGGCTTAAGGTCTTTACCCAAAGCGGCGCGGACTATCTCATCGCCATTGGCGGCGGTTCTCCGCAGGATACCTGCAAAGCGATCGGTATTATCAGTAACAATCCGGAATTTGCCGATGTGCGCAGTCTGGAAGGGCTATCGCCGACCCGTAAACCCAGCGTGCCG…	ATG	TAA
SL1344_4308	ATGGCAAAAAAACGAAAATCCAGAAGCACATCCGGCGTAGGCCATTCGGCAATAAGACGAATAGCCGAACCGGTCAATCCCTTTGAGCGGCAACGAAATCGCTACACGCCAAAATGCCTGACGCTGGCGATTATGGGTGGAGCGGCCTTTTTTCTCCTGAAAGGGTGCGGTGATGGCGGCAATAGTGACAACGACGGCGATGGGACGTTTTACGCCACGGTGAACGACTGTATTGACGATGGCAATAGCGCCAGCGTTTGCGCTGACGGCTGGAATAATGCGAAAACAGAATTTTACGCTAATGTGCCTAAGCAATTGACGCAGGAGCGCTGTCAGACGCAGTTTGGCGATTGCTACTTTGATATTACCGAGCGGAGCTGGGTTCCGGTATTAAGCGGC…	ATG	TAA
ybfM	ATGCGTACGTTTAGTGGCAAACGTAGTACGCTGGCTCTGGCTATCGCCGGTATCACAGCAATGTCGGGGTGGATCGTTGTTCCGCAGGCGCAAGCCTCCGGCTTTTTCGACGACTCCACGTTAACGGGCGGCATCTATTATTGGCAGCGTGAACGCGATCGCAAAGATGTGACCGACGGCGACAAATATAAAACTAACCTTTCTCATGCGACCTGGAACGCTAACCTGGATTTTCAGTCTGGTTACGCTGCGGATATGTTCGGTCTGGATATCGCGGCGTTTACCGCGATTGAAATGGCAGAAAACGGCGACAGCGGTCATCCAAACGAAATTGCCTTCTCGAAAAAGAATAAAGGCTACGACGAAGACTATTCCGGCGATAAGAGCGGTATCAGTCTT…	ATG	TGA
SL1344_4144	ATGCGCTACCTTGAACATGTCACCACCGACGGCGAACGCTGGGATAATCTCGCCTGGCGCTATTACGGCGATGCGCTGGCCTACGAACGCATCATCGCGGCCAATCCGCACGTCGCTATTATGCCGGTTTTACCGTCAGGCGTGCGGCTGATCATCCCGGTTATCAGCGTCACGCAAACGACCCCGGAGCTACCGCCATGGCTGAGATAA	ATG	TAA
SL1344_1641	GTGAAATATTTACTCATTTTCTTACTGGTATTGGCGATTTTTGTTATTTCGGTGACGCTGGGCGCGCAGAATGATCAACAGGTGACGTTTAACTACCTGCTGGCGCAAGGGGAGTATCGTATCTCCACGTTGCTTGCTGTGCTGTTCGCCGTCGGTTTTGCGATTGGCTGGCTGATTTGCGGCCTGTTCTGGCTGCGGGTCCGCGTTTCCCTTGCCCGCGCTGAACGTAAAATTAAACGACTGGAAAACAAGCTCTCGCCAGCAACCGACGTTGCGGTCCCTGCCGATTCGTCGGTTGTAAAGGAATAA	GTG	TAA
apbA	ATGAAAATTACTGTACTGGGATGCGGAGCCTTAGGACAACTTTGGCTTTCGGCACTGTGCAAACACGGACATGACGTACAGGGCTGGCTACGGGTGCCACAACCTTATTGCAGCGTAAATCTGATCGATACCGATGGTTCCTTTTTCAACGAATCACTGACGGCAAACGATCCGGATTTTTTGGCGAAGAGCGAACTGTTATTAGTCACGCTGAAAGCGTGGCAGGTTTCCGACGCAGTACGAACCCTGGCGTCAACCCTACCGGTGACGTCGCCTATCCTGCTCATTCATAATGGAATGGGAACCATAGAAGAACTGCAAAATATCCAACAGCCGATGTTGATGGGGACTATCACCCATGCTGCGCGCCGCGACGGTAATATCATTATTCATGTCGCT…	ATG	TAG
SL1344_3547	ATGGCAACCGCTCAACCCGACAAAACGGGTATGCATATTCTGCTGAAACTGGCCTCCCTGGTTATTATTCTCGCCGGGATTCATGCCGCGGCGGATATTATTGTACAACTCTTGCTGGCGCTCTTTTTCGCCATTGTTCTTAATCCATTAGTGACCTGGTTTATTCGTCGGGGCGTGAAGCGACCGCTGGCGATTACTATCGTGGTGGTCGTCATGCTGATCGTGCTTACCGCGCTGGTGGGTGTGCTTGCCGCATCGCTTAATGAATTTATCGCTATGCTGCCTAAATACAGCAAGGAGCTGACGCGTAAGGTCTTACACCTTCAGGAGTTAATGCCCTTCCTGAATTTACATATGTCTCCGGAACGTATGCTCCGCGGGATGGATTCCGATAAAATC…	ATG	TGA
tus	ATGTCCCGCTACGATCTCGTTGAACGCCTGAATGGCACTTTTCGCCAGATAGAACAACACCTGGCGGCGCTGACGGATAATCTACAGCAGCATTCGCTACTTATCGCCCGTGTCTTTTCACTGCCGCAGGTGACCAAAGAGGCGGAACATGCGCCGCTGGATACTATCGAGGTAACGCAACATCTGGGGAAAGAGGCCGAAGCGCTGGCGCTACGTCACTATCGCCATTTGTTTATTCAACAGCAGTCCGAAAACCGCAGCAGTAAAGCCGCCGTCCGCCTGCCTGGCGTCTTATGCTATCAAGTGGATAATGCGACACAGTTAGATCTGGAAAATCAGATACAGCGCATTAACCAGTTGAAAACCACCTTCGAGCAGATGGTTACGGTAGAGTCCGGT…	ATG	TAA
stfE	ATGCTGAGTGCGGTCAGTATGCCGCTGGCAGCGGGAAGTAAGACGGTCAACATGACGCTGACGATAGTCGTTAATGCCGCGCCGCCCTGTACTGTGACCGGCGGTGAGGTGGAATTTGGCAATGTGTTGACGACGAAAGTGGATGGGGTGAATTACCGGCAGGCGGTGGGCTATCGCCTGAGCTGTAACGGCAGAGTGAGCGATTACCTGAAGTTACAGATTCAGGGGAATGCGGTGACTATCAATGGCGAGTCGGTATTGCAAACCGATGTCGATGGATTGGGTATCCGTCTGCAAACCGCCACGGATGGCGCGCTGATTTCACCCGGCAATACGCAATGGTTGTCATTTCAATACAGCGGCGGCAGCGGTCCGGCCATTGAGGCGATTCCCGTCAAA…	ATG	TGA
SL1344_2564	ATGAAAGGGCTTGAAAATGCGATCCGGAATCTGAACAGCCTTGACCGACAGATGGTTCCCCGGGCCAGTATCTGGGCTGTGAATCGCGTGGCGCAGAAAGCTGTTTCAGTGGCAACCCGTAAGGTGGCGCGGGAGACTGTCGCCGGAGATAACCAGGTAAGAGGACTTCCGCTGAAGCTGGTTCGCCAGAGGGTGAGGTTATTTAAAGCCGGTACAGACGGTAAACGCTCTGCCCGGATACGGATTAACCGGGGAAACCTTCCCGCCATAAAGTTGGGCGCTGCACAGGTCAGGATGAGCAAACGGAGGGGCAAACTGCTGTATCGCGGAAGTGTGCTTAAAATCGGGCCATATCTGTTCCGGGATGCCTTTATTCAGCAACTGGCTAACGGACGCTGG…	ATG	TGA
icdA	ATGGAAAGCAAAGTAGTTGTTCCGGTGGAAGGTAAGAAGATCACCCTGCAAAACGGCAAACTCAACGTTCCTGAGAATCCGATTATCCCGTTTATTGAAGGCGATGGTATCGGTGTTGATGTCACTCCAGCCATGCTTAAAGTAGTCGATGCCGCCGTCGAGAAAGCCTATAAAGGCGAGCGTAAAATTTCCTGGATGGAAATTTACACCGGAGAAAAATCCACACAGGTTTACGGCCAGGATGTCTGGCTTCCCGCTGAAACCCTTGATTTAATTCGTGACTACCGCGTAGCGATTAAAGGTCCATTGACCACGCCGGTTGGCGGCGGTATCCGCTCTCTGAACGTTGCCCTGCGTCAGGAGCTTGACCTGTACGTTTGTCTGCGTCCCGTTCGTTAC…	ATG	TAA
SL1344_3483	ATGGGGCAAAGGGAAATTGAATATTCGGGACAGTTCCAGAAAGATGTAAAACGGGCACAAAAGCGTCATAAGGATGTCGGCAAACTTAAAACACTTATGACGCTTCTGATTCACCACCCTTTTCCCCTTCCTGCCATTTATAAAGATCACCCGTTACAAGGTTCATATAGCGGATACCGGGATGCCCATATTGAGCCTGACTGGATTCTTATTTATAAGATAACGGATGAATGCCTGCGATTTGAACGAACAGGAACGCATGCCGATTTATTTTAA	ATG	TAA
dapE	ATGTCGTGCCCGGTTATTGAGCTGACACAGCAACTTATTCGTCGCCCCTCCCTGAGTCCGGATGACGCAGGCTGTCAGGCATTAATGATTGAACGCCTGCGTAAAATCGGTTTTACCATTGAGCATATGGATTTTGGCGACACGCAAAATTTTTGGGCATGGCGTGGGCGTGGCGAAACGCTGGCGTTCGCCGGGCATACTGACGTCGTACCGGCTGGCGATGTCGATCGCTGGATCAATCCGCCGTTTGAGCCTACGATTCGCGACGGAATGTTGTTCGGTCGCGGCGCGGCGGATATGAAAGGTTCACTGGCGGCCATGGTGGTGGCTGCTGAACGTTTTGTTGCGCAGCATCCTCATCACCGGGGCCGCCTCGCATTTTTGATTACCTCTGATGAG…	ATG	TGA
cheM	ATGTTTTTGCATAACATTAAAATACGTTCAAAATTATTTATGGCCTTTGGCTTATTCATTGTTCTCATGGTGGTGAGTTCCGCTCTGTCTTTGTTTAGCCTTGATCGGGCTAATACGGGTATGCAGAACATTATTACCAATGATTATCCCACCACGGTGAAAGCCAATCTGTTAATCGATAATTTTAATGATTTCATCATCGCGCAGCAGCTCATGTTACTGGATGAAGAGGGGCGCTGGAGCCAGAGTTCGCAGAAAGAGCTGGATGAAATAAGCCAGCGTATTACGGCGTTACTGGATGAGCTTTCCAGCAATCGTCACGATGCGGCTTCGCAGAAAATCATTACCGAGATCCGTGAAGCGCGCCAGCAATACCTGGAGTCCAGATTCCGTATTTTG…	ATG	TAA
helD	ATGGAACTGAAAGCAACTTCTCTTGGAAAACGTCTGGCGCAACACCCGTATGATCGTGCCGAGATCCTCAACGCTGGGGTGAAAGTGTCTGGCGACAGGCATGAATATCTTATTCCATTCAATCAGTTATTGGCGATTCACTGTAAGCGTGGGCTGGTATGGGGCGAGCTGGAGTTTGTCCTGCCGGAGGATAAAGTCGTGCGTTTGCACGGTACCGAGTGGTCGGAAACCCAGCAATTCCATCGCTATCTGGACGCGCACTGGCGTCGCTGGAGCCAGGAGATGAGTGATGTCGCCGCGCAGGCATTACAGGAGCAATGGGCGCGTATTAGTGAGCGAACGGGCGGAAACCAATGGCTTACCCGTGAACGCGTTCGGGGGCTGGAACACGAAATTCGC…	ATG	TAA
rpsC	ATGGGTCAGAAAGTACATCCTAATGGTATTCGCCTGGGTATTGTAAAACCATGGAACTCTACCTGGTTTGCGAACACCAAAGAATTCGCTGACAACCTGGACAGCGATTTTAAAGTACGTCAGTACCTGACGAAGGAACTGGCTAAAGCGTCTGTATCTCGTATCGTTATCGAGCGTCCGGCTAAGAGCATCCGTGTGACTATTCACACCGCTCGCCCGGGTATCGTTATCGGTAAAAAAGGTGAAGACGTAGAAAAACTGCGTAAGGTCGTAGCGGATATCGCTGGCGTTCCTGCACAGATCAACATCGCCGAAGTTCGTAAACCTGAACTGGACGCTAAACTGGTTGCTGACAGCATCACTTCTCAGCTGGAACGTCGCGTTATGTTCCGTCGTGCG…	ATG	TAA
SL1344_2215	TTGATGCGTGATATTCAGATGGTTCTTGAGCGTTGGGGGGCATGGGCGGCGAGTGATAGCTCAGGAGTGGACTATTCGCCTATAGCTGCTGGGTTTAAAGGGCTTCTTCCCTATACCTGCAAGACACGTGTGGCTTGTTCTGATAATGACGCATTAATTGTTGAGGGGTGTCTTGCTCGTTTAAAGCAAAAAAGGCCTGATGAGCATTCGCTTCTTGTGGCACATTATTTATACAGAATATCCAAGCGTAAGATTGCAAAGGTGCGTGGGAAGGATGAGAAATTGGTACGTATAGAAATACAGTTAGCCGAAGGATTTATTGATGGCTGCCTTTCAATGCTGGATCTAACATTAGATATGGACGTTTAA	TTG	TAA
fadA	ATGGAACAGGTTGTCATTGTCGATGCTATTCGCACCCCGATGGGCCGTTCGAAGGGCGGCGCGTTTCGCAACGTGCGAGCAGAAGATCTCTCCGCCCACTTAATGCGTAGCCTGCTGGCGCGTAATCCGTCGCTTACAGCGGCGACCCTCGATGATATTTACTGGGGCTGCGTACAACAAACGCTGGAGCAAGGCTTCAACATTGCCCGTAACGCCGCGCTGCTGGCAGAAATTCCCCATTCGGTACCGGCGGTCACCGTCAACCGTCTGTGTGGTTCCTCGATGCAGGCGTTACACGATGCAGCGCGAATGATCATGACCGGCGATGCGCAGGTTTGTCTGGTTGGCGGCGTGGAGCATATGGGGCACGTGCCGATGAGCCACGGCGTGGATTTTCAC…	ATG	TAA
exo	ATGCTCGCCTCCCCCCGCCGTGAATGTTACCCTACGCGCAGGTTTGTAAGGGAGAACACCGTGGCTGCTCATCTGCTTATCGTCGACGCGCTCAATTTGATTCGCCGTATTCACGCCGTTCAGGGATCGCCCTGTGTGGAAACCTGCCAACACGCGCTCGATCAATTGATTATTCACAGCCAGCCAACCCATGCCGTAGCGGTATTTGATGACGACGCGCGCAGCAGCGGCTGGCGTCATCAGCGTTTGCCGGACTACAAAGCAGGACGTCCGCCGATGCCTGACGATTTACATAATGAAATGCCCGCCCTACGCGCCGCATTTGAACAGCGCGGCGTACGCTGTTGGGCATCAGACGGTAACGAAGCGGACGATCTGGCGGCGACGCTGGCGCTAAAA…	ATG	TAG
yjfL	ATGCATATACTGGACGCATTACTGGCTTTCTGCGCCTATTTTTTTATTGGCGCGGCAATGGTCATTGTATTTCTTTTTATTTACTCAAAGATAACGCCGCATAATGAATGGCAGTTGATAAAAAATAACAATACTGCGGCATCGCTGGCCTTTAGCGGTACGTTGCTGGGCTATGTCATCCCCTTATCCAGCGCGGCGATAAACTCGGTCAGTATCCCGGACTATTTTGCCTGGGGCGGCATTGCGCTGGTGATTCAACTGCTGATTTATGGTTGCGTAAGGTTATACATGCCTACGCTGAGCGAAAAAATTATTCATCACAACGTGGCGGCGGGGCTATTTATGGGAACCGCAGCGCTGGCTGGCGGTATTTTTAACGCTGCCTGTATGACATGGTAA	ATG	TAA
serB	ATGCCTAACATTACCTGGTGCGATCTGCCTGAAGATGTCTCTTTATGGCCTGGTTTGCCTCTTTCTTTAAGCGGCGACGAGGTGATGCCTCTGGATTACCATGCAGGCCGCAGCGGTTGGCTGCTGTATGGGCGCGGGCTGGATAAGCAGCGTTTAACTCAATATCAGACCAAACTGGGCGCCGCAATGGTGATTGTCGCCGCCTGGTGCGTGGAGGATTATCAGGTCATTCGTCTGGCGGGGTCGCTGACGCCGCGTGCGACGCGGCTGGCGCATGAGGCGCAGCTGGATGTCGCGCCGCTGGGTAAAATTCCGCATCTGCGCACGCCGGGGCTGCTGGTGATGGATATGGATTCCACGGCGATCCAAATTGAGTGTATCGATGAAATCGCGAAGCTG…	ATG	TGA
glnS	ATGAGTGAGGCTGAAGCCCGCCCGACTAACTTTATTCGTCAGATTATTGATGAAGATCTGGCGAGTGGTAAACATACCACTGTCCATACCCGTTTTCCGCCGGAGCCGAATGGCTATCTGCATATCGGCCACGCGAAATCTATCTGCCTGAACTTTGGCATCGCGCAAGATTATCAGGGCCAGTGCAACCTGCGTTTCGATGACACCAACCCGGTAAAAGAAGATATCGAGTACGTTGATTCGATCAAAAACGACGTCGAGTGGTTAGGCTTTCACTGGTCTGGCGATATTCGCTACTCCTCCGATTACTTTGACCAACTGCACGCCTATGCGGTCGAGCTAATCAATAAAGGCCTGGCCTATGTTGATGAGCTGACGCCGGAGCAGATCCGTGAATAC…	ATG	TAA
SL1344_1640	ATGGGCCGCAGAAGTGCGCAACAAACAAAACAGGATGAAGCTAACCGCCTGTCGCGCGATTATGTCGCAGGGGTTAACTTCCTGCTGAGTAACCAACAAGATAAAGCGGTGGATCTGTTCCTCGATATGCTTAAAGAGGATACGGGCACCGTTGAGGCTCATCTCACTCTCGGTAATCTGTTTCGCTCACGCGGCGAAGTCGATCGCGCCATTCGTATTCATCAAACGCTCATGGAAAGCGCTTCATTGACCTATGAACAGCGTTTACTGGCTGTTCAGCAACTGGGGCGCGACTATATGGCCGCCGGTTTATATGACCGCGCGGAAGATATGTTTAACCAACTTACCGACGAAACGGAATTTCGCGTAGGCGCGTTACAGCAGCTCTTGCAAATCTAT…	ATG	TAG
thiJ	ATGAGCGCTCAGGCACTGGTATGCCTCGCCCCTGGTAGTGAAGAGACCGAAGCGGTCACCACTATCGATCTGCTGGTTCGCGGCGGAATCCACGTCACTACCGCCAGCGTCGCCAGCGATGGCAACCTGACGATTGTCTGCTCGCGCGGTGTAAAGCTACTGGCGGATGCGCCGCTGGTTGAAGTTGCCGACGGCGATTATGACATCATCGTGTTGCCCGGCGGAATTAAAGGCGCCGAGTGCTTTCGCGACAGCCCGCTGCTGGTCGAAACCGTAAAACAGTTTCACCGCTCCGGGCGCATTGTCGCAGCCATTTGCGCCGCAGCCGCCACAGTGCTCGTGCCGCACGATATCTTCCCTATCGGCAATATGACCGGTTTTCCGGCGCTGAAAGATAAG…	ATG	TAA
fumC	ATGGTAACGGTACGCCGCGAGAAAGATTCAATGGGCGCGATTGAAGTCCCGGCAGATAAACTGTGGGGGGCGCAGACTCAACGTTCGCTGGAGCATTTTCGGATTTCCACGGAGAAAATGCCCGTCTCGCTCATTCACGCTCTGGCGTTGACCAAGCGCGCCGCTGCGAAGGTCAACCAGGACTTAGGGTTGTTGGCGGCGGAAAAAGCCAGCGCGATTATCCAGGCGGCTGATGAAGTGCTGGCGGGAAAACATGCTGATGAGTTTCCGCTGGCGATTTGGCAGACCGGGTCCGGTACGCAAAGCAACATGAATATGAATGAAGTGTTAGCGAACCGCGCCAGTGAAATTTTGGGCGGCGTTCGCGGTATGGAACGCAAGGTGCATCCCAATGATGAC…	ATG	TAA
gipA	GTGTTTGCTCATCAGAATGCCTCCTTTCCTCCCCGGCCTGAAGGCCGGGGAGGAAAGGAGGCGGTTTTCCGGCTAACTGTCTTTTGCATAATCACATTTTCCTCTTTAATATGTGAAGCCATGAAACGCGCATATAAATACCGGTTTTACCCCACGACTGAGCAGGCTGAGCTTTTAGCTCAGACGTTCGGTTGTGTGCGTTTCGTCTACAACTCCATCCTCCGCTGGCGTACCGATGCGTACTACGAGCGAAAGGAAAAGATCGGTTACCTACAGGCCAACGCTCGCCTTACGGCGCTGAAAAAGGAGCCAGAATTTGCCTGGCTTAACGACGTTTCCTGCGTTCCCCTCCAGCAGTCTTTGCGCCACCAACAAACCGCCTTTGCTAACTTCTTCGCC…	GTG	TAG
SL1344_4459	ATGCCGATGGAGTTTGAATGGGATGCGAACAAGGCTAAAAGCAACCTGAGGAAGCACGGTGTCCGTTTTGAGGATGCGGTACTGGTGTTTGACGATCCCCGACACCTGTCACGTCAGGAGCGTTATGAGAATGGAGAATATCGTTGGCAGACCCTCGGCCTTGTTCATGGCATTGTGGTCATTCTGGTTGCTCATAGCGTTCGGTTCGAAAGTGGTTTTGAAGTTATCCGTATCATCAGCGCCCGCAAGGCAGACAGAAAAGAGAGGAATCGTTATGAGCATGGTTAA	ATG	TAA
cobT	ATGCAGACACTACACGCTTTACTCCGTGACATTCCTGCGCCGGACGCCGAGGCGATGGCGCGTGCGCAGCAACATATTGACGGCCTGCTCAAACCGCCGGGCAGCCTGGGCAGACTGGAAACCTTAGCCGTTCAGCTCGCGGGTATGCCGGGTCTTAACGGTACGCCGCAGGTAGGTGAAAAGGCGGTGCTGGTGATGTGCGCCGACCATGGCGTCTGGGATGAAGGCGTAGCGGTTTCGCCCAAAATCGTGACGGCGATTCAGGCGGCGAATATGACGCGGGGAACAACCGGCGTATGCGTGCTTGCCGCTCAGGCCGGTGCGAAGGTGCATGTCATTGATGTCGGTATTGATGCCGAACCTATTCCTGGCGTAGTTAATATGCGCGTCGCGCGCGGC…	ATG	TAA
SL1344_2445	ATGATTACCCTCTATGGCATTAAGAATTGCGACACGATCAAAAAAGCGCGCCATTGGCTGGAGGAACATGGCATTGATTATCGTTTTCACGATTACCGTGTGGATGGCATAGACCTCCCTCTTCTTAATACCTTTATTGCCGAACTCGGCTGGCAGCCTTTACTGAATACGCGCGGCACAACATGGCGCAAACTGGATGAAGGCCACCGCAGCGGGATTACCGATGCCGACTCCGCCGCTGCTCTCATGGTTGAACAGCCGGCAATCATCAAACGCCCATTGCTCTGCGCGCCCGGGAAGCCTATGCTGCTTGGTTTCAGTGAATCCCGTTATCAGCAGTTTTTTGATGAGGTGTAG	ATG	TAG
SL1344_3188	ATGATGCAAAATCAACATGAAGGGTGTTGCAAAAACCGGGATCATATGCACGATGGTTGCTGCAAAGATCGAGAACATCAGCATGAAGGCTGCCATAGCGCGCATCAGCATGAGAACGCCAGTTGCGGCGGCGAGCACCGTCACGGACACGGCTGTGGTCGTCATGGACAGGGCGGTGGTCGACGTCAGCGATTTTTTGGCCACGGGGAACTTCGGCTGGTCATTCTTGATATCCTGACCCGGGACGCCAGCCACGGCTATGAACTGATTAAAGCGATAGAAAACCTGACGGGGGGCGGCTATACGCCAAGCGCTGGTGTGATCTACCCTACGCTGGATTTTTTACAGGATCAGCAATTTATCACGATTAGCGACGAAGAAGGCGGGCGGAAAAAAATC…	ATG	TAA
SL1344_2726	GTGGTAAATTACCCCTATTTTTCAGTGAATGTTTTGTCAGGGAGTATTAATTTCGTGGAAAACGATAAGGTGAAGTTAGGAAGAAATGATAAATGCTGGTGCAAATCAGGACTTAAGTATAAAAAATGCCATCTCGATCGAGACCGTGAAATGCCGGTATCTAAAGCCGAAGCCCTGAAATTTTCAAAGTCTAATTCGCAGAGAAAGGCGTGTTATGCACCAGCATCCATGCACGAAGATTGTGACAAACGTATCGTTCAGGCGCACACGCTTTCTAAGAGCAGTAGCCTTAAGGCGATCGCCGACTCTAGTAATCATGTTATGGGAGTGGTAATGAACCTGCCGAGCCTGATAAAAAACAACGGAAGATGGGTTCCAGAGAAGATTGGTATCAATCAG…	GTG	TGA
yccF	ATGCGTACCGTTCTGAATATTTTAAACTTTGTACTGGGCGGCTTTGCCACTACGCTGGCCTGGCTGCTGGCGACGCTGGTCAGTATTGTGCTTATTTTTACCCTGCCGTTGACCCGCTCCTGCTGGGAGATAACCAAACTGTCCCTGTTCCCTTACGGTAATGAAGCCATTCACGTTGACGAACTTAATCCGGCGGCAAAAAGCGTATTAATGAATACTGGCGGTACCTTGCTGAATATTTTCTGGTTACTTTTTTTCGGCTGGTGGCTATGCCTGATGCACATTGCCTCCGGTATCGCGCAGTGTGTCACTATCATCGGGATACCTGTCGGTATTGCGAACTTTAAAATTGCCGCGATTGCGCTTTGGCCTGTCGGTCGCCGCGTCGTCTCTGTAGAA…	ATG	TGA
SL1344_2214	ATGTTAGAAACACTATCATTCACTGAACGTGACGAGTTCCAACGAAGAAACATCGCTGAAAATATCATCAAATTGCTAAAACCAGAGGCAGACATTTCACCACTGGTAATAGACGGTGCATGGGGGACAGGGAAATCAGAATTTAGTATCAAACTGAAGAATCTCATTATCGAGCAAGAAACTGAGTCTAAAGTTGTCTATGTTGATGCCTTTAAAGGGGATCATGCAGAATCTCCATTACTTCTAATAACATCAGCTATTGCGAGCATTTTGCCGGAGGAGGAAAAACAAAACTTCATTAAGAGATCTCTTCCTGCAATTCGATTTGGTTTAAAAACTGTACTAAAAGCTGGTGCAGGTTGGTTTTTACGACAGGAGGCTAGTGAAGTTGCCGAAGAA…	ATG	TAA
SL1344_3934	ATGAAATTTAAATATGCTTTAACTTCTCTCGCATTATCTGTTGCAATTTTGTCATCAGTACCTTCTACTGCTTTCGCCATCGGCGGCGCCAGCGGCGCTAAAGTGGACTATCAGGTCCAGGGAAAAATTGGCGAAGTTGTTATGAACCCCTATGATATCGCGCCGCTAACCGCCGTTATTCGTAATGGCGGTTACCAGTTACGTGACGTGCATGTACGGATTGTACCCAAAGAAAATGGCCAGGAGATCGCGTATAAAGTTAATAATAAATACCTTTTAACGTATGGCGGTATTCCCGTCTTTGGTCTTTACCCGGATTATGTCAATACCGTTGAAGTTGAATATACAAGTATCCAGGGTAGTAAAACCGAAAATGTAAAAGAAAGCTATAAAATGTAT…	ATG	TAG
sdaB	ATGATTAGCGTATTCGATATTTTTAAAATCGGCATTGGCCCTTCCAGTTCTCACACCGTCGGACCAATGAAAGCAGGCAAGCAGTTCACGGACGATCTGATTGCCCGCCATATTCTTACAGATGTCACCCGCGTCGTGGTGGATGTCTACGGCTCTCTGTCATTGACGGGTAAAGGCCACCACACTGATATCGCCATTATTATGGGCCTGGCGGGGAATCTGCCGGACACCGTCGATATCGACGCCATTCCGTCCTTTATCCAGGATGTGAACACCCATGGGCGTTTACTACTGGCTAATGGGCAGCATGAAGTCGAATTTCCGGTCGATAAGTGCATGAATTTCCACGCCGACAACCTGTCTCTGCATGAGAACGGGATGCGTATTACCGCGCTGGCG…	ATG	TAA
SL1344_4306	ATGGCAAGAGATAGAGGTTCCCCTATGATGCAATTTTTTCAGCGTTTGCTCGGTAAAACAAGCGCGCCAGCGCCGATTCGCGGACCATTAGGATTACATCTTAACGCCGGTTTCACGCTGGATACGCTGGCATTTCGGCTACTGGAGTCGTCGTTGCTGGTGGCGCTACCGGGTGAAAAATACACTGTCGCGGCAGCGAGTCGCATAGATTTAGGCGGCGGCAGTCAGATTTTTCGCTACTACACCTCTGGCGATGAGTTTCTACAAATTAACACCACTGGCGGCACGGATGTTGACGACATTGATGACATCAAACTTTTTGTATATGAGGAAAGTTTCGGTATTAACGAGGAACGTCACTGGCGTTCAGCCATTGCGCCAGCGGCAATAGGGCCGATG…	ATG	TAA
nagE	ATGAATATTTTAGGTTTTTTCCAGCGGCTGGGTAGGGCGTTGCAGCTCCCTATCGCCGTGTTGCCGGTGGCAGCGTTGTTGCTGCGATTCGGCCAACCAGATTTGCTGAATATGCCGTTTATCGCGCAAGCGGGCGGGTCTATTTTCGATAACCTGGCGCTGGTTTTCGCTATCGGCGTGGCCTCCAGTTGGTCTAAAGATAGCGCGGGCGCGGCAGCGCTGGCGGGAGCCGTGGGTTACTTCGTCATGACCAAAGCGATGGTGACGATTAACCCGGAAATCAACATGGGCGTGCTGGCGGGGATTATTACCGGTCTGGTCGGCGGCGCGGTTTATAATCGCTGGTCTGGTATCAAACTGCCTGATTTTCTCAGTTTCTTCGGTGGAAAACGTTTTGTA…	ATG	TAA
SL1344_4143	ATGGCTGAGATAACGGTATCCGGCGGGGTGTTCGCCACCCTGACGCCCATTTTTACCCTTTGGTACGGACATAAAGAGATCACTTACGACATCGCGCCTTATGTCACCAGCATCAGTTACAGCGACAGTATTAAAAACGAGTCGGATGTCATTGCCATTGCGCTGGAAGATAGCACCGGGCGCTGGGTAAACGAATGGTATCCGGGAAAAGGCGACACGCTGGCGCTGCGCCTGGGCTACCAGGGCGAAGATCTGCTCGATTGCGGAATCTATGTCATTGATAAAATTGATATCAGCGCGCCGCCTTCGACGGTCAATATCGACGGTATCGCCACCTCGGTCAGCAAAGCGCTACGCACCAAAAACAGCCAGGGCTTTGAGGAGACTACGCTTTCCGCC…	ATG	TAA
pyrF	ATGACGTTTACTGCTTCATCTTCTTCCTGCGCTATTACTGAATCGCCTGTCGTTGTGGCGTTGGATTACCATGAACGCGATAAAGCCCTGGCGTTTGTCGATAAAATCGATCCTCGCGATTGTCGCTTAAAAGTGGGCAAAGAGATGTTCACGCTGTTTGGTCCACAGCTCGTTCGGGATCTCCAGCAACGTGGGTTTGATGTCTTTCTTGATCTAAAATTTCATGATATTCCCAACACCACGGCCCGGGCGGTCGCCGCTGCGGCAGACCTGGGCGTCTGGATGGTAAACGTTCACGCGTCTGGCGGGGCGAGAATGATGGCCGCAGCGCGCGACGCGCTGGCGCCATTCAGTAAAGATGCGCCGTTGCTCATTGCCGTGACCGTGTTGACCAGTATG…	ATG	TAA
phnX	ATGATGAACCGTATTCACGCTGTTATTCTCGACTGGGCGGGCACCACCGTCGATTTTGGCTCCTTCGCGCCGACGCAAATTTTCGTTGAGGCGTTCCGTCAGGCATTTGATGTGGAGATCACCCTCGCTGAAGCACGCGTGCCAATGGGGCTGGGTAAATGGCAACACATTGAAGCGCTGGGAAAATTACCTGCTGTTGACGCGCGCTGGCAGGCAAAGTTTGGCCGCTCCATGAGCGCAGCAGATATTGATGCCATCTACGCCGCTTTCATGCCGTTACAGATTGCTAAAGTTGTCGATTTTTCTTCTCCTATTGCCGGAGTTATCGACACGATCGCGGCGCTACGAGCCGAGGGTATCAAGATAGGCTCCTGCTCCGGTTACCCACGAGCGGTGATG…	ATG	TAA
fumA	ATGTCAAACAAACCCTTCTTTTATCAAGACCCTTTTCCCCTCAAAAAGGACGATACCGAGTACTACTTGTTGACCAGCGAACATGTTTCCGTCGCCGAATTCGAAGGACAAGAGATCCTGAAAGTCGCGCCGGAAGCGCTAACGCTGTTGGCGCGTCAGGCCTTCCACGATGCGTCTTTTATGCTACGTCCCGCGCATCAGCAGCAGGTGGCGGATATTCTGCGCGATCCGCAGGCCAGTGAAAACGACAAATATGTCGCGCTGCAATTCCTGCGAAACTCCGATATCGCGGCCAAGGGCGTGTTGCCCACCTGCCAGGATACCGGTACGGCCATTATTGTCGGCAAAAAAGGTCAACGCGTCTGGACTGGTGGAGGTGATGAAGCGGCGCTGGCTCGC…	ATG	TAA
stfD	ATGATGTCATTAAAACGTTATAACCTGGCCGCTGTTTTGCTGCTTTTGCTGGGCGGCTACGGTAGCGCCCAGGCCGCCATCGCGCCCGATCGCACCCGCCTGGTGTTTCGCGGCGAAGATAAATCGATAAGCGTCGATCTGAAAAACGCCAACAGCAAACTGCCCTATCTGGCGCAGTCCTGGGTGGAAGATGAGAAGGGCGTCAAAATCACCTCGCCTTTAATCGTCGTCCCACCGGTCCAGCGCATTGAGCCGTCGGCAATCGGACAGGTCAAAATTCAGGGGATGCCGGCGCTGGCGTCGCTCCCCCAGGATCGGGAAACCCTTTTTTATTACAACGTGCGCGAAATTCCGCCGCAAAGCGACAAGCCCAATACGCTGCAAATCGCCCTGCAAACG…	ATG	TAA
SL1344_2562	ATGAGCAAACACACATTAATCCGCCGGGCCGTTCTGGAAAAGCTGGAATCCGTGACTGGCGCACCTGTCACTCTTTTTGATGGACTTCCTGCTTTCGTAGAACAGGAAGATTTACCCGCAATAGCTGTCTGGCTGACAGACGCACAGTATACAGGCCTTATGACCGATGAGGATGACTGGCAGGCTACTCTCCATACGGCAGTTTTTCTGAGGGCTCAGGCTCCTGATACAGAGCTTGATATCTGGATGGAAGAAAAAATCTTTCCTGCGCTGGAAGAGGTTAGTGGTCTGGAGCGCCTTATCGATACCATGACCCCGCTGGGTTATGACTACCAGCGTGACAGCGAAATGGCAACGTGGGGGATGGCAGAAATTACTTACCGGATCACCTATACCAAC…	ATG	TGA
rluB	ATGCGGCAATTAATAAGTTCTGAAAACACCATGCAAAAAACTTCTTTTAGAAATCACTACGTTAAGCGATTCAGCTCACGACAAGCATCTAAATCACGGAAAGAAAACCAGCCAAAACGCGTGGTTTTGTTCAATAAACCTTACGATGTGTTGCCGCAGTTCACGGATGAAGCAGGTCGCCGCACGTTAAAAGATTTTATTCCTGTGCAAGGCGTTTATGCCGCAGGCCGCCTGGACCGCGACAGCGAAGGGCTTTTGGTGCTGACTAATGACGGCGCGCTGCAGGCGCGCCTCACGCAACCGGGCAAACGCACCGGCAAGATTTACTATGTTCAGGTAGAAGGTATACCGGATAATGCAGCGCTGCAGGCGCTTCGTACTGGCGTCACGCTCAACGAT…	ATG	TGA
acrD	ATGGCGAATTTTTTTATCGATCGCCCCATTTTTGCCTGGGTGCTGGCTATCCTGTTGTGTCTGACAGGGGCGTTAGCCATTTTCTCTTTACCTGTTGAACAATATCCCGATCTGGCGCCGCCCAACGTACGTATTACCGCGAATTATCCGGGAGCGTCGGCGCAAACGCTGGAAAATACCGTAACCCAGGTTATTGAGCAGAATATGACGGGCCTCGATAATCTGATGTACATGTCATCACAAAGCAGCGGAACCGGACAGGCGACCATCACCCTGAGCTTTATTGCGGGAACCGATCCTGATGAGGCGGTTCAGCAGGTGCAAAACCAGTTACAGTCCGCGATGCGTAAACTGCCGCAGGCGGTACAGGATCAAGGCGTCACGGTACGCAAAACGGGC…	ATG	TAA
SL1344_3187	ATGACGACATCATCCGTACGCTACCCACAGCGTGTTCGTAATGAGCTGCGTTTTCGCGAGCTGATCGTTCTGCGGGTAGAACGTATTAGCGCAGGATTTCAGCGGATCGTACTTGGCGGCGAGGCGCTGGACGGTTTCATCTCCCTGGGCTTTGACGATCACACGAAAGTTTTTTTCCCTGAGCCAGGCTGTCGCTTTACGCCTCCGACAGTCACTGAGGAAGGCATTATCTGGGGGGAGGGCGTTCGCCCGGTCTCCAGGGATTACACGCCGCTGTATGACGAGGCGCGTCGCGAGCTGGCGCTGGATTTCTTTATCCACGATGGCGGCGTAGCCAGCCGTTGGGCAATGGAAGCCCGTGAAGGCGATACACTGACGATCGGCGGGCCGCGCGGTTCG…	ATG	TAG
SL1344_1013	ATGTTAAGTCCGTTGATTCGCCGTTATACCTGGAACAGTACCTGGCTGTATTACATCCGCATTTTTATCGCTCTGTGCGGCACCACCGCCCTGCCCTGGTGGCTGGGCGACGTCAAACTTACCATCCCGCTCACGCTCGGTATGGTTGCCGCGGCGCTAACCGATCTCGACGATCGCCTTGCCGGACGCTTGCGTAATTTAATCATTACCTTAATTTGCTTTTTTATCGCGTCGGCTTCTGTGGAGCTGCTCTTTCCCTGGCCGTGGCTATTTGCGTTGGGCTTAACGTTATCCACCAGCGGGTTTATTCTGTTGGGAGGACTGGGGCAACGCTATGCCACCATCGCGTTCGGCGCGTTACTCATTGCCATCTATACGATGCTGGGTACCTCTTTATAC…	ATG	TAA
SL1344_2213	ATGCCTCATAACCCAAATACCTGGCCTGATTTACTTGAATTGTTACAGAGCTGGTGGCGTGGAGACACACCGCTGGGCGCAGTCATTATGTCGATTGTTATGGCTGGTTTGCGCATCGCCTATTTTGGCAGTGGTGGCGGCTGGAAGCGAAAAATGCTCGAGATTTTGCTCTGTGGCGCTCTGACACTGACCTTTGCATCTGCTCTTGAGTATGTCGGATGGATGAGCCGCAACGAAGCACGCGCGTTTGAGGACATGAATCCGAAAGACGGCCTTGATGAAATGCTGGTCAGCGTCAACGCCTCCCGGCCAGCCAAAACCACAATCTAG	ATG	TAG
ubiB	ATGACAACCTTAAGCTGTAAAGTGACCTCGGTAGAAGCTATCACCGATACCGTATATCGGGTTCGTTTAGTGCCGGACGCGGCGTTTTCATTCCGCGCTGGTCAGTATTTGATGGTCGTAATGGACGAGCGTGACAAACGCCCGTTTTCGATGGCTTCAACGCCGGACGAGAAAGGGTTTATTGAATTACACATTGGCGCCTCCGAGCTCAATCTGTATGCGATGGCGGTCATGGATCGGATTCTGAAAGACCGGGAAATCGTCGTCGATATTCCGCATGGCGACGCCTGGCTACGTGACGATGAAGAGCGTCCGTTGATTCTGATCGCGGGCGGTACGGGCTTTTCTTATGTGCGCTCCATCCTGTTGACGGCGTTAGCGCGCAACCCGGCCCGCGAT…	ATG	TAA
sdaC	ATGGAAACCACTCAGACCAGCACTATTGCTTCGATTGACTCTCGAAGCGCATGGCGCAAAACGGATACCATGTGGATGCTGGGCCTTTACGGCACGGCTATCGGCGCGGGCGTTCTGTTCCTGCCGATCAACGCAGGCGTCGGCGGCATGATTCCGCTCATCATCATGGCGATTCTCGCTTTCCCGATGACCTTTTTCGCACACCGTGGTTTAACCCGCTTCGTGCTGTCCGGTAAAAATCCGGGTGAAGACATCACTGAAGTCGTTGAGGAACACTTCGGTATCGGCGCAGGTAAACTGATTACCCTGCTTTACTTCTTCGCGATTTACCCCATCCTGCTGGTTTACAGCGTGGCGATTACTAATACCGTGGAAAGCTTCCTGACCCACCAGTTAGCG…	ATG	TAA
SL1344_4305	ATGCTCTTTACGTGGATTGTCAAAACCTGCCAGCGTCATTTGTCCAGACTGACCTGGCCCGCTTTGCTGGGCCTGTTTATCGGGCAGTATCTGCTTTGTTATCTGGTGCTGCGCCTGTTGCGCGAAAGCGCGTTGGTGAGCCAGTTAAGCGATTTTATCTATTACTGCTCGGTGGTGGGTTCCACATTAGGTTTTGGCGATCTTAGCCCGCAGACGGCGCCAGGACGTCTGTTCACCGCGCTGTGGCAAATTCCGGTTAGCGTCGGGTTGTTCGGCGCGTTAATGGGAAAAGTGATTGCGCAGGTACAGGGAATGTTAGCGAAAGGAATAACGGGCATGGGCGATTATCGCCATTTACACCATCATATGCTGGTGATTGGCTGGCGGGGTCATCAAACC…	ATG	TGA
smp	ATGGCTCGCGCAAAACTGAAATTTCGGCTGCATCGTGCAGTCATTGTATTGTTCTGTCTCACACTGCTCGTCGCGCTTATGCAGGGCGCGTCCTGGTTTAGTCAAAACCACCAGCGACAGCGCAACCCGCAGCTGGAAGAGCTGGCCCGCACGCTGGCGCGCCAGGTGACGCTCAACATCGCCCCGCTGATGCGCAGCGAAACACCGGATGAAAATCGCATCAACGCCGTGCTGCGTCAGCTCACGCAAGAGAGCCGTATTCTGGATGCCGGCGTCTATGATGAACAGGGCGATCTTATTACTCGCGCTGGCGAAAGCGTCAATGTGCGCGACAGGCTGGCGCTGGATGGCAAAAAAGCGGGCAGCTATTTTAACCAACAAATTGTCGAGCCTATCCAG…	ATG	TAA
nagB	ATGAGACTGATCCCCCTGAGTACCGCAGAACAGGTTGGCAAATGGGCCGCTCGCCATATCGTTAACCGTATTAATGCGTTCAAACCGACCGCCGATCGTCCGTTTGTCCTTGGACTGCCTACCGGCGGCACGCCGCTAACGGCGTACAAAGCGCTGGTTGAGATGCACAAAGCGGGCGAGGTCAGCTTTAAGCATGTGGTCACCTTTAATATGGACGAATATGTTGGCCTGCCGAAAGAGCATCCGGAAAGCTACCACAGCTTTATGCATCGTAACTTTTTCGATCACGTTGATATTCCAGCAGAAAACATCAATCTTCTCAACGGTAACGCACCGGATATCGATGCAGAATGCCGTCAATATGAAGAAAAAATTCGTTCTTACGGTAAAATCCATCTG…	ATG	TAA
SL1344_1638	ATGAGCGATTCCAATAGTCGTCTGGTTTATTCAACGCAGACGGGGCGCATTGAAGAACCTAAAACGGCGCCGGTTCGTCCCAAAGGGGATGGTATCGTTCGCATTCAGCGTCAAACCAGTGGCCGTAAGGGTAAAGGCGTATGTTTGATTACCGGTATCGAGATGAATGATGCGGAATTAACCAAACTGGCGGCTGAACTGAAGAAAAAATGCGGCTGTGGCGGGGCAGTAAAAGAAGGGATTATTGAAATTCAGGGTGATAAACGCGACTTGATAAAATCATTGCTGGAAGCTAAAGGAATGAAAGTAAAATTAGCTGGCGGCTAA	ATG	TAA
phnW	ATGACTTCGCGTAACTATCTGTTGCTGACTCCTGGCCCGCTCACCACCTCTCGCACCGTGAAAGAAGCGATGTTGTTCGATAGCTGTACCTGGGATGATGATTACAATATCGGCGTGGTAGAACAGATCCGCCAGCAGCTGACCGCACTGGCAACGGCCTCCGAAGGCTACACCTCCGTACTGCTGCAAGGCAGCGGCAGCTATGCTGTGGAAGCCGTACTGGGCAGCGCATTGGGGCCGCAGGATAAGGTGCTGATCGTCAGCAACGGTGCATACGGCGCACGAATGGTCGAGATGGCCGGCCTTATGGGAATCGCCCATCACGCTTACGACTGCGGCGAAGTTGCGCGCCCGGATGTGCAGGCGATCGACGCGATCCTCAACGCCGACCCGACGATC…	ATG	TAA
manA	ATGCAAAAACTCATTAACTCAGTGCAAAACTATGCCTGGGGAAGTAAAACTGCGTTAACGGAACTTTATGGCATCGCCAATCCGCAGCAGCAGCCAATGGCTGAACTCTGGATGGGCGCGCATCCCAAAAGCAGCTCGCGAATCACCACCGCCAACGGCGAAACCGTCTCCCTGCGTGACGCCATCGAAAAGAATAAAACCGCCATGCTGGGCGAAGCGGTAGCCAACCGTTTCGGCGAACTGCCGTTTCTGTTTAAAGTACTGTGCGCCGCACAACCGCTCTCTATTCAGGTGCACCCGAATAAACGCAACTCCGAAATCGGTTTCGCGAAAGAAAATGCGGCGGGTATCCCCATGGATGCCGCAGAGCGGAACTATAAAGATCCTAACCATAAACCA…	ATG	TAG
SL1344_2561	ATGATGGGAACACCAAACCCACTGGTAAAAACGAAAGGCGCCGGAACCACATTCTGGCTGTATACCGGCAGCGGCGATGCGTTTAAAAATCCACTGGCTGATGATGACTGGCTGCGACTGGCAGGTATTAAGGATCTGCAGCCCGGAGAAATGAGTGCAGATGCGGAAGACGATGACTATCTTGATGATGAAAATGCCGACTGGAAAAGCACTACGCAGGGGCAGAAAAGCGTCGGTGACACCACGGCCACGCTGGCCTGGAAACCCGGTGAGACCGGACAGAAAAAACTGGTTGAGCTGTTTGACACCGGCGAAGTTCGCGCCTTCCGTATCAGGTATCCTAACGGGACGGTTGATGTGTTCCGCGGCTGGCTGAGTTCACTGGGTAAAACCGTGACG…	ATG	TAA
SL1344_4458	ATGGCTGTTCCAACATATGACAAATTTATTGAACCAGTGTTGCGTTTTCTGGCCACTCGACCCGAGGGCGCTTTGGTCAGAGAAGTGCGTGAAGCTGCAGCCGAAATGCTTGGGTTAGATGAGCAGCAGCGTGCAGAGGTGATTACCAGTGGACAACTGACGTACCAGAACCGCACCGGTTGGGCGCACGATCGTCTCAAACGCGCCGGGTTATCGCAGAGCCTATCCCGGGGAAAATGGTGTTTAACACCAGCGGGAATGAGCTGGGTTGCCTCGCATCCGCAGCCGATGACCGAGCTGGAAGTGAGTCATTTTGCTTGTGATTTTAACGGCGTAAAGCTCAGTAAGCTGGCAGATGCGGTGGCGTTAGATCCACAGCCAGAATCGATTGAGGATGAT…	ATG	TAG
erfK	ATGCGTCGTATCACACCTTTTTTTCCGTTTTTCGTCTTGTTGGTAAGCCATTTCTCGCTGGCTATAAGCTATCCGTTGCCGCCCGAAGGCAGTCGTCTGGTAGGACAGCCTGTCACAATCGCCGTACCGCAGAACAATACTCAGCCCTTAGAGTCATTTGCCGCCCGCTACGGTCAAGGGCTGAGTAATATGCTTGAAGCGAATCCCGGCGTGGATGTGTTTTTACCTCAGTCTGGTTCCACACTGGTGGTGCCGCAGCAGTTGATTCTGCCTGACACCGTTCGTGAAGGTATTGTGGTAAACGTCGCCGAGATGCGCCTTTATTATTATCCCGCAGGCACGAATACGGTTGAGGTGCTACCTATTGGTATTGGTCAGGCTGGCCGTGAAACGCCGCGC…	ATG	TAA
narQ	GTGACGGTTAAACGCCCGGTCTCGGCCAGTCTGGCTAAGGCTTTTTTCTATATTGTGCTGTTGTCTATTCTGTCCACCGGCAGCGCATTACTGACGCTGACCAGCAGTTTACGGGATGCCGAAGCGATCAATATCGCCGGTTCGCTACGAATGCAGAGCTATCGGCTGGGTTACGATCTGCAAAGCCGTAGCCCGCAGATTAATGCGCATCGTCAACTTTTCCAGCACGCGCTCAACTCGCCGGTACTGCAAAATCTCAACGCCTGGTATGTGCCGCAGGCGGTAAAAACTCGCTACGAGCGCCTGCACGCCAACTGGCTGGAGATGAATAGCCGCCTACAGGACGGCGACATTGCCTGGTATCAGACCAATATCAACAATTACGTCAATCAAATTGAT…	GTG	TAA
mug	ATGGTTAAGGACATACTGGCGCCAGGGCTACGGGTGGTTTTTTGCGGCATCAATCCGGGACTCTCCTCGGCGAATACCGGCTTTCCGTTTGCGCATCCCGCGAATCGTTTTTGGAAAGTTATTCATTTGGCCGGTTTCACCGATCGACAGTTGAAACCGGAAGAGGCGGAAAAATTACTGGATTTTCGCTGCGGGGTAACGAAACTCGTCGACCGACCGACGGTACAAGCGACTGAGGTGAAGTTGCATGAATTACGTAGCGGCGGACGAAACCTGATTGAAAAAATAGAGGACTACCAGCCCGCGGCGCTGGCGGTGCTTGGTAAACAGGCTTTTGAACAGGGGTTCAGCCAGCGCGGTATCGCCTGGGGTAAACAAAAGATCGCCATTGGCGCGACG…	ATG	TAG
SL1344_2725	GTGACCAGTCCCATTCGTCAGAATCTGTTTGAACGGGAATGTGATATGCCGCTTCTGGAAGCGCGGCATCTCGCCCTTCTGCTTCTAGGCCTCGATGCTTCCCAACCTGCAAACGCCCTGCCGGAAGAACATCAGGAAAACTACCGTATCCTGCACGACGCCATCAGCCGGACCATTAAGGCAACAGGCATGGTCAGTGCCCCGGCGAACAAGCGCATGTTCTATGCCGATGAGATGTTTGCCCTGGCCTGGCGGCTTATTGATGACGAACTGACGCCGTCAGAAGTAAAAGACCGTAGCCTGAAGGCGGTGATGAAACTGTCGCGTAATAGCCGTGGCCGCAAGTGGCTGAAGACGCTCGGCGACGACGCACTACCGGATCTCACGGCTTCAACACAA…	GTG	TGA
SL1344_1012	ATGAGAGCACTCTCTTATGACAGGATCTATAAATCGCAAGAATATTTGGCCTCTTTGGGGACGATCCAGTATCGATCTTTATTCGGTAGCTATAGTCTGACCGTGGAGGATACCGTCTTTGCGATGGTGGCTAATGGCGAGCTTTATCTCCGCGCCTGTGAAGAAAGCGTACCCTACTGTGTGAAGCATCCTCCCGCCTGGCTCATGTTTATGAAATGTGGACGTCCCGTTATGCTCAACTATTACCGGGTGGATGAAAGCCTGTGGCGCGATCAGCAGCAGCTGGTGCGTTTATCGAAGTATTCTCTTGACGCGGCAATGAAGGAAAAACACAGCCGTATTTTACAGCACAGACTCAAAGATCTCCCCAATATGACCTTCCATCTGGAAACATTGCTC…	ATG	TAA
SL1344_2212	ATGAGTGAACGTGAAATTCGCTGTTACAGCGGCGAGGTGCGCGCAGAAACGCACGACAGCGAGCCCAGCCGGATCATCGGGTATGGTTCGGTCTTTGACAGTCGTTCTGAACTGATTTTCGGTTCGTTTCGCGAAATCATCCGGCCCGGTGCGTTTGATGAAGTGCTGAATGACGATGTACGGGCGTTGTTCAACCATGACCCCAATTTTATCCTGGGTCGCAGAAGTGCGGGCACGCTGGCACTGACGGTTGATGAGCGGGGGCTGCGTTATGACATCACCGCGCCAGAAACTCAGACAATCCGTGATCTGGTGTTGGCACCAATGCAGCGCGGGGATATCAACCAGTCCTCTTTTGCATTTCGCGTCGCCCGCGACGGAGAGGAATGGTACCAGGAC…	ATG	TGA
SL1344_3932	ATGGACGCCATGAAATATCACGATTTACGCGACTTCCTGACGCTACTTGAGCAGCAGGGGGAACTAAAACGCATCACGCTACCTGTGGATCCTCATCTGGAAATCACGGAAATCGCTGACCGCACGCTGCGTGCCGGTGGACCGGCGTTGCTGTTTGAAAATCCTAAAGGTTACGCCATGCCGGTGCTGTGCAACCTTTTTGGCACGCCAAAACGCGTGGCGATGGGCATGGGGCAGGATGATGTTTCCGCCTTACGGGAAGTGGGTAAATTATTAGCGTTTCTTAAAGAACCTGAGCCGCCGAAAGGCTTTCGCGATCTGTTTGACAAGCTGCCGCAGTTTAAGCAAGTGCTGAATATGCCGACGAAACGGTTACGCGGCGCGCCTTGCCAGCAGAAA…	ATG	TAA
SL1344_2949	TTGATTACACATATTAGCCCGCTTGGCTCAATGGATATGTTGTCGCAACTGGAAGTGGACATGCTGAAACGCACGGCCAGTAGCGACCTGTATCAACTGTTTCGTAACTGTTCACTTGCCGTTCTTAACTCCGGCAGCCTGACCGACAACAGCAAAGAGCTGCTGTCCCGCTTTGAAAATTTCGATATTAACGTACTGCGCCGCGAGCGCGGCGTGAAGCTGGAATTGATTAACCCGCCTGAAGACGCTTTTGTTGACGGGCGGATTATTCGTGCGCTACAGGCTAACCTGTTCGCGGTGCTGCGCGACATTCTCTTTGTGAATGGGCAGATCCACAATGCCGGCCGTTTCCAGCATCTGGATCTTGAAAGCTCAACACATATCACCAATCTGGTATTC…	TTG	TAA
SL1344_4303	ATGGCATGGACTCCACGGACGCTGGCGGATGCATTAAACAACATCGCCGAATTAGATATTGATATAGAAAATAATGAATCTTCATTAATAATAAAAATGAATGATTATGGCGATTTACCACTGGCGGTTTTATTTACCTCGCAACAAATAGTTATCGAGACTTATATCTGTCCGGTAAATACGATTAGAGATACCGCGGAATTTAATCTTTTCTTGCTGAGAAATCAGAAGGTTTTACCGCTGTCTTCGGTCGGTATTACCCAGGTAAAACAGGAGGAATATTATGTCGCTTTTGGCGCGCTGTCGTTAAATTCGTCGCTTGCCGACGTGATGCTGGAAATCACCACGCTTGTAGAAAATGCGTTGGATATCGCTGAAATAACACAAGTCTATTCACAG…	ATG	TAA
nagA	ATGTATGCTTTAACCCAGGGCCGGATCTTTACCGGTCACGAAATTCTTGATGACCATGCGCTTGTTGTCGCTAATGGCCTGATTGACCGCGTTTGTCCGATGGCCGAACTGCCGCCGGGAATAGAACAACGCTCATTGAATGGGGCCATTCTCTCCCCCGGTTTTATTGATGTGCAGCTAAACGGCTGCGGCGGCGTGCAGTTTAACGATACCGCAGAAGCCGTCAGCGTTGAAACGCTGGAAATTATGCAGAAAGCCAATGAAAAATCGGGCTGTACTAACTTTCTGCCAACGCTTATCACTACCAGCGACGAATTGATGAAACAGGGCATTCGCGTCATGCGCGAATACCTGGAAAAACATCCGCACCAGGCGCTGGGTCTCCACCTGGAAGGCCCC…	ATG	TGA
SL1344_4142	ATGAAAGGCGTTACCCGCCAGACGGGTATTATCAGCGATATTGATGAGGCGGTCGTGCGCGTCAGAGTCACTCTACCGGAGTGCGATAACCTGCGCAGTAACTGGCTTGCGGTGCTGCAACGCAACACGCAGGACAACAAAGATTACTGGTTGCCGGATATTGGCGAACAGGTGGAAGTTTCGCTCGACGACAACGGCGAGGATGGGGTGGTGCTGGGCGCGGTCTACTCCAGCGTGGATACCGCGCCGCTGGCCTCGCGCGACAAGCGCTACGTGCAGTTTTCCGACGGCGCGGCCTTTGAATATGACCGTGCGTTACACCAGCTCACCGTCAACGGCGGCATAGAAAAAATCGTCATTGAAGTGAAGGAACATACGCAGCTTACTTCACCGCAAGTA…	ATG	TAA
osmB	ATGTTTATGACGAGCAAAAAAATGGCCGCTGCTGTGCTGGCAATCACCGTAGCAATGTCTCTGAGCGCCTGCTCAAACTGGTCCAAGCGCGATCGCAACACGGCTATTGGCGCAGGTGCGGGGGCGTTAGGCGGCGCAGTGTTAACGGACGGCAGTACATTAGGCACCCTGGGCGGCGCGGCGGTCGGCGGCGTGATTGGTCACCAGGTTGGAAAATAA	ATG	TAA
phnR	ATGAAATCTATCCCGGGCGATATCCCGCAGTACCTGTTGATCAAGGCGCAGCTTCAGGCGCGTATTCAGAGCGGTGCGTTGAAAAGCGGTGATAAACTGCCGTCTGAACGCGAACTGTGCGCGATCTTCAACACCACGCGCATTACTATTCGCGAAAGTCTGGCACAGCTGGAGTCCAGTGGGCTTATCTGGCGCGCCGATCGTCGCGGTTGGTTCGTTACGCCGGAACGCCTGTGGCTGGATCCGACCCAGAACACCAACTTCCATAAGCTTTGCCGCGAGCAGGGGCGGGAGCCAAAAACCGCGCTACTGAGCGGCGTGTTAACCACCGTGCCTGTCGAGGTCATGGAGCCCCTCCAGCTCCAGCCGTTTGATCAAATCTATCTGCTGACCCGTCTG…	ATG	TAG
SL1344_3546	ATGCCCGAACCCGTCGCTGAACCGGCGCTAAACGGATTGCGCCTCAATCTGCGTATTGTCTCCATTGTGATGTTTAACTTTGCCAGCTACCTGACCATCGGCCTGCCGCTCGCCGTCTTGCCCGGCTATGTGCATGATGCGATGGGATTCAGCGCGTTCTGGGCGGGGCTTATTATCAGCCTGCAATACTTCGCCACTCTGTTAAGCCGTCCCCATGCCGGGCGGTATGCGGATGTATTAGGGCCGAAAAAAATCGTTGTCTTTGGCTTATGCGGCTGTTTTTTAAGCGGACTCGGCTACCTGCTGGCGGATATCGCCAGCGCCTGGCCGATGATCAGTTTGTTGCTACTGGGGCTGGGTCGCGTGATTTTAGGGATTGGGCAAAGTTTTGCCGGCACC…	ATG	TAA
SL1344_1396	ATGAAAAAAACACTGGTAGCTGCAGGTGTAGTAATTGCACTTGGCATCGTCTGGACAGGCGGCGCCTGGTATACGGGGAAAAAGCTGGAGAACCATCTTGCAGAAATGGTGACTCAGGCCAATGAACAGCTCAAGCGTACTGCGCCGGAGGCCGGTGTCGAATTAAGTTATCAAAACTACCAGCGCGGCGTGTTCAGTAGCCATCTGCAACTGGTTGTCAAACCGGTTGCCGGCGCAGACAATACCTGGTTGAAGCCCGGGCAAAGCATTGTGCTGGACGAGTCCGTTTCACATGGCCCCTTCCCGCTCGCCCAGCTCAAAACGCTCAATCTGATCCCTTCTATGGCGTCGGTAAAAACCACTCTGGTGAATAACGATGCGGCAAAACCCCTCTTTGAT…	ATG	TAA
stfC	ATGGCTCACTATAAAAAATTTCGTCTGAGCACGCTTGCGGCCGTGGTGGGTATTGTTCTGGCTGTCGGTCCGGAAAATAGCTACGCGGAAGCGCCCATTCAATTTAATACCCGATTTCTTGATGTTAAAGATGATGCCAGCCTGGATCTCTCCCGTTTTTCCCGTAAAGGCTACATTATGCCGGGGAGCTATCATCTCCAGGTGCTGGTCAATCAGAGTCAAATTGTCCAGGATAATGTTATTACGTATTCCGTTGATAATAACGATCCTGATAACACCTATCCCTGTTTATCGCCTGAACTGGTCTCGCTGCTGGGGTTAAAACCTGAAATAGCAGATAAAATGATCTGGATAAATGCCGGTCAGTGTCTGCAACCAGATCAACTGGAAGGGATGGAA…	ATG	TGA
SL1344_2560	ATGTTTCTCAATACAGACACCTTTAACTACGGTGGGCATTCCATCGTGCTCAGTGAGCTTTCTGCCCTGCAACGTGTGGATTATCTGAAGTTTATTCAGCAGCGGACGGCAGACTATGACGCACAGCCTGAAACCCTGACGGAAGCAGAGCGTCAGACAGAATTTATGCAGATGGGGGTGGATATTAATGCATGGCTGGTATCCCGCTCCCTGTGTGAAAGCAAAAAAGAGGAGGAGGCCCGCGCCCTGTATGAGTCCGTCAGACTGGAATGGTCTTATGAGGCGCTGGGACGTGGCGCTGATATGGTTCTGTCCCTGAGTGGTATGCGTCTTCCGGCATCGCAGGAAGACGACAGCGGGAGTGAAAAGGACACGACCACGCCGGAAAAGTCCTGA	ATG	TGA
SL1344_1174	ATGAAACGGCTTCTCATTGCTTTTGCTTTATTAACACCGTTATCCGTTAATGCGGCCAGCTTCGACTGCCAGAAAGCGCAGGCTGCGGATGAAAAGGCTATCTGCGCGCACCTGACGCTGAATGATAAAGACGTGGAAATGCACACCAAATATCAGTTTCTGAAAGGGTTGTTCGCGATGGGCAGTCGCGGCGCCCTGCAGGACGCCCAGCAGAGCTGGCTTAAACAGCGTCAGCAGTGCAAGGCCGACGTCACCTGCCTGACAAAAGCTTATAACGAGCGTCTGAAACAGCTTGACGTGATCTATGACCACATTGATAAACCGCTTTAA	ATG	TAA
malT	ATGTTGATTCCGTCTAAATTAAGTCGTCCGGTTCGTCTCGACCATACCGTGGTTCGTGAGCGGCTGTTGGCTAAACTTTCCGGCGCGAACAATTTCAGGCTCGCCCTGGTAACCAGTCCTGCTGGCTATGGGAAAACCACGCTTGTCTCACAGTGGGCGGCGGGCAAAAATGAATTAGGCTGGTACTCTCTCGACGAAGGCGATAACCAGCAAGAGCGATTCGCCAGTTACTTAATTGCCGCTATCCAACAGGCCACTGGCGGACACTGCTCGACCAGCGAAGCGATGGCGCAAAAACGTCAGTACGCCAGCCTGACGTCTCTCTTCGCACAGCTCTTTATTGAACTGGCGCAGTGGCATCGCCCGCTTTATCTGGTGATTGACGACTACCATTTGATT…	ATG	TGA
aegA	ATGAATCGTTTTATTATGGCCAATAGCCAGCAGTGTCTGGGCTGCCATGCCTGCGAGGTCGCCTGCGTAATGGCTCACAATGATGAGCGACATGTCCTGACGTCACAGCGCTATCAGCCCCGAATTACTGTCATTAAACATCAGCACCAGCGCAGCGCGGTTACATGTCACCATTGCGAAGATGCGCCCTGCGCCCGTAGCTGTCCGAACGGCGCGATCGCGCATATTAACGACAGCGTGCAGGTCAATGCGCAGAAGTGCATCGGCTGTAAATCCTGCGTCGTCGCCTGTCCATTCGGCACCATGCAGATGGTATTGACGCCCGTCGCGCCAAACCAGTTCAAAGCCAGCGCGCATAAATGCGATCTGTGTCAGGGACGTGAACAGGGGCCGGCCTGT…	ATG	TAA
rpoD	ATGGAGCAAAACCCGCAGTCACAGCTGAAACTTCTTGTCACCCGTGGTAAGGAGCAAGGCTATCTGACCTATGCTGAGGTCAATGACCATCTGCCGGAAGATATCGTCGATTCAGATCAAATTGAAGATATCATCCAAATGATCAACGACATGGGTATTCAGGTAATGGAAGAAGCGCCTGATGCCGATGATCTGCTGCTGGCTGAAAATACCACCAGCACCGATGAAGATGCGGAAGAAGCTGCTGCACAAGTTCTGTCCAGTGTTGAGTCTGAAATCGGTCGTACGACTGACCCGGTACGCATGTATATGCGTGAAATGGGCACTGTTGAACTGTTGACCCGGGAAGGCGAAATCGACATCGCTAAACGTATCGAAGACGGGATCAACCAGGTTCAA…	ATG	TAA
sulA	ATGTACACTTCAGGTTATGCAAATCGTTCTTCGTCATTTCCTACCACTACCCACAACGCTGCGCGCACCGCTACGGAAAATGCCGCGGCAGGACTGGTCAGTGAAGTTGTCTACCACGAAGACCAGCCCATGATGGCGCAACTCCTGCTTTTGCCTTTACTCCGTCAGTTAGGCCAACAATCACGATGGCAGCTCTGGCTCACGCCGCAGCAAAAGCTCAGCCGTGAATGGGTACAGTCTTCAGGTTTGCCATTAACGAAAGTGATGCAAATTAGCCAGCTTGCGCCTCGTCATACGCTGGAGTCGATGATCCGCGCTTTGCGTACAGGAAATTACAGCGTGGTAATTGGTTGGATGACTGAAGAACTGACAGAAGAAGAACATGCCAGCCTGGTTGAA…	ATG	TAA
rplP	ATGTTACAACCAAAGCGTACAAAATTCCGTAAAATGCACAAAGGCCGCAACCGTGGTCTGGCTGCAGGCGCGGATGTTAGCTTCGGCAGCTTCGGCCTGAAAGCTGTTGGCCGTGGTCGTCTGACTGCCCGTCAGATCGAAGCAGCACGTCGTGCTATGACCCGTGCAGTTAAGCGTCAAGGTAAGATCTGGATCCGTGTATTCCCGGACAAACCGATCACTGAAAAGCCGCTGGCAGTGCGTATGGGTAAAGGTAAAGGTAACGTGGAGTATTGGGTTGCCTTGATTCAGCCGGGTAAAGTCCTGTATGAAATGGACGGCGTACCGGAAGAGCTGGCCCGTGAAGCATTCAAGCTGGCAGCAGCGAAACTGCCGATTAAAACCACCTTTGTAACTAAG…	ATG	TAA
SL1344_2211	ATGCACAGAATTGATACGCCCACTGCGCAAAAAGATAAATTTGGTCAGGGGAAAAACGGATTTACGAATGGTGATCCCGCCACGGGCCGCCGCGCAACGGATCTCAACAGTGATATGTGGGATGCAGTCCAGGAAGAGGTCTGTACTGTTATTGAAGCCGCCGGCATACCACTCAGTAAAGGCGAACATACGCAGCTTCACGCCGCCATTGGCAGGTTGATCTATGAACAGGTTAAAACCCGTCTTGAAAAAAATCAGAATGGCGCGGACATCCCGAATAAGCCGCTGTTTCTCCAGAACGTTGGTTTAGTAGACGTTCTTTTTAAAGGTGACGGGCGATTCCTCGCGGGAACGTTTGTCAGTGACGCAATTGACCGAACATCAATCGGCGCGCGTGCG…	ATG	TAA
rfaH	ATGCAATCCTGGTATTTACTGTACTGCAAACGCGGGCAACTTCAGCGTGCTCAGGAACACCTCGAAAGACAAGCGGTAAGTTGCCTGACACCGATGATCACCCTGGAAAAAATGGTACGCGGAAAACGTACCTCCGTCAGCGAACCGCTCTTTCCTAATTATCTGTTCGTTGAATTTGATCCGGAAGTGATACATACCACTACAATCAACGCCACGCGCGGCGTCAGCCATTTTGTGCGCTTTGGCGCGCATCCTGCGATCGTGCCTTCCAGCGTTATTCATCAGCTTTCTATCTACAAGCCCGAAGGCGTTGTCGATCCTGAAACCCCCTATCCCGGCGATAGCGTCATCATCACGGAAGGCGCATTTGAAGGGCTGAAAGCGATTTTTACCGAACCG…	ATG	TAG
SL1344_2948	ATGTCTTCTTATGAAAACCATCAGGCTCTTGATGGCCTGACTCTCGGAAAATCAACGGATTACCGGGACAATTATGACGTCAGCCTGCTGCAGGGCGTACCGCGCAGTTTGAATCGTGACCCGCTCGGATTAACAGCCGATAATTTGCCGTTCCACGGCGCGGATATCTGGACGTTGTATGAACTTTCCTGGCTTAACAGCCAGGGTCTTCCGCAGGTCGCCGTCGGGCATGTCGAACTGGATTACACCAGCGTTAATTTAATCGAATCCAAAAGCTTTAAACTGTATCTGAACAGCTTTAACCAGACGCGCTTTGACACCTGGGAGACGGTTCGCCAGACGCTGGAGCGCGATCTGCGCGCCTGCGCGCAGGGCAACGTTAGCGTGAGGCTTCATCGT…	ATG	TAA
yjfH	ATGAGCGAAATGATTTACGGCATCCACGCAGTGCAGGCCCTGCTGGAGCGCGCCCCTGAACGTTTTCAGGAAGTCTTTATTTTAAAAGGCCGTGAAGATAAACGTCTGTTGCCGCTGATCCACGCCCTTGAGTCCCAGGGCGTGGTTATCCAGCTGGCAAACCGCCAATATCTCGACGAGAAAAGCGACGGTGCCGTGCATCAGGGTATTATCGCTCGCGTGAAACCAGGCCGGCAGTATCAGGAAAACGATCTGCCGGATCTGATCGCATTACACGATCGCCCTTTTTTGTTGATCCTCGATGGCGTCACCGATCCGCATAATCTTGGCGCCTGTCTGCGCAGCGCCGATGCTGCAGGCGTACATGCGGTAATCGTGCCGAAAGACCGCTCCGCGCAA…	ATG	TGA
lplA	ATGACAACATTACGCCTGCTTATTTCTGACTCTTACGATCCCTGGTTTAACCTGGCGGTCGAGGAGTGCATTTTCCGCCAGATGCCCGCCACCCAGCGCGTGCTGTTCCTGTGGCGCAACGCGGATACGGTGGTCATTGGACGCGCGCAAAACCCGTGGAAAGAGTGTAATACGCGGCGTATGGAAGAAGATAATGTCCGTCTGGCCCGCCGTAGCAGCGGCGGCGGCGCGGTATTCCATGACCTCGGTAATACCTGCTTTACCTTTATGGCTGGTAAACCGGAATACGATAAAACCATCTCCACCCATATTGTGCTCGCGGCGCTGAATTCGCTGGGGGTCATGGCCGATGCTTCGGGACGCAACGATCTGGTCGTAAAAACGCCGGACGGCGATCGC…	ATG	TAA
nagC	ATGACACCAGGCGGACAAGCTCAGATAGGTAACGTTGATCTCGTAAAACAGCTTAACAGCGCGGCCGTTTACCGCCTGATTGACCAGCATGGTCCTATCTCGCGCATACAAATTGCCGAGCAAAGCCAGCTTGCTCCCGCCAGCGTAACGAAAATTACGCGTCAACTCATTGAACGCGGGCTGATCAAAGAAGTCGATCAGCAGGCCTCTACCGGAGGCCGCCGCGCTATCTCTATCGTCACGGAAACCCGTAACTTCCACGCCATTGGCGTTCGCCTGGGGCGTCATGACACCACTTTAACGCTCTACGATCTGAGCAGTAAAGTGGTCGCTGAGGAGCATTATCCGCTGCCGGAGCGCACCCAGGAGACGCTGGAACATGCGCTGCTCAACACTATC…	ATG	TGA
SL1344_1636	ATGAACTCCCGACAACAATCAATTTTGCAAATGGTGGTTGATAAAGGCCAGATGAGCGTTGCTGAACTGGCGAAAATTACCGGCGTATCTGAAGTCACGATTCGTCAGGATCTGAATACCCTGGAAAAGCAGAGCTATTTACGCCGTGCGCACGGTTTCGCCGTTTCGCTTGAGAGCGATGACGTAGAGACTCGCATGATGACGAACTACACGCTAAAACGCCGACTGGCGGAGTTCGCCGCCTCGCTGGTCAGTCCAGGGGAATCCGTTTTTATTGAAAATGGCAGCAGCAATGCGCTATTGGCCCGGACGCTGGCGGAACAAAAAGATGTCACGATCATCACCGTGAGCAGTTATATCGCGCACCTGCTCAAAGAGACCCCTTGCGAAGTCATTCTC…	ATG	TAA
phnS	GTGGTCACGGTGTACTCCATCGACGGGCTGCATGATGGCGATAACAGCTGGTACCAGGTACAGTTTGACGCATTCACCAAAGCGACCGGCATTACCGTACGCTATGTTGAAGGCGGTGGTGGCGTGGTAGTGGAACGTCTGGCAAAAGAGCGCACGAATCCACAGGCCGACGTGCTGGTAACCGCGCCGCCATTCATTCAGCGCGCCGCCGCCGAAAAGCTGCTGGCGAACTTTAACACCGACACCGCATCGGCTATCCCCGATGCCAACAACCTTTATTCGCCGCTGGTAAAGAACTATCTGAGCTTTATCTACAACAGCAAGCTTCTGAAAACTGCCCCGGCGAGCTGGCAGGATCTGCTTGACGGTAAATTCAAAAATAAACTCCAGTATTCCACG…	GTG	TAA
add	ATGATTGATATTACGCTTCCTTTGACTGACATCCACCGCCACCTTGATGGCAACATTCGCGCCCAAACAATTCTGGATCTTGGTCGGCAGTTCAACATCGCCCTTCCCGCCCAAACGCTGGAAACGCTGATTCCGCATGTCCAGGTCACCTCAACCGAACCCGATTTAGTAAGCTTTCTCACTAAACTCGATTGGGGGGTAAAAGTCCTGGCATCGCTTGACGCCTGCCGCCGTGTGGCCTTTGAAAATATTGAAGATGCGGCACGTAACGGCCTGCATTACGTCGAGCTTCGCTTTTCGCCCGGCTATATGGCGATGGCGCATCAGTTACCAATCGCAGGCGTGGTTGAAGCCGTTATCGACGGCGTACGCGACGGCTGTAACACGTTTGGCGTCGAG…	ATG	TAA
SL1344_2559	GTGATGCGGCTCGCGCGTGAGTTCCGGCGACCAGACTGGCGGCAGATGCTGGCGGAAATGAGTGCGACAGAGCTGGGTGAGTGGGCGGAGCATTTCGGGAAGAACAGCTTCAGTGACATGTTGCTGGATGCGGAGTTTGCAACGCTGAAATCGCTGATTTCCGGACTGGTTACAGGCACGCATCACGATGCAGAAATGTTCAGCCTGATCACTGATCCTGAGTCGTTGCACGAAAAAACGGATGATGAACTGATGATCCTGGGCGAAGGTATTACCGGAGGTGTCCGCTATGGACCAGATAGCGAACCTGGTCATTGA	GTG	TGA
SL1344_4457	ATGAACAAATCTAACTTCGACTTTCTCAAAGGCGTCAACGACTTCATTTACGCCATCGCCTGCGCGGCGGAAAACAACTATCCGGACGATCCTAATACCACTCTGATAAAAATGCGCATGTTTGGCGAAGCCACCGCGAAACATCTCGGCCAGTTGCTGGATATACCGGCCTGCGAAAACCAGCATGACCTGCTGCGCGAACTGGGCAAGATTGCGTTTATTGATGACAGCATCCTTTCTGTTTTCCATAAGCTGCGCCGTATCGGTAACCTGGCCGTCCACGAATTTCATAACGATCTGGACGATGCCCAGATGTGCCTGCGGCTCGGGTTCCGCCTCAGCGTCTGGTACTACCGGCTGGTGACCAAAGATTACGATTTCCCGGTGCCGATGTTTGTT…	ATG	TAA
SL1344_1990	ATGTGGTTTCAACTCTCTTCTTTAAGGTCCATTTTGAACGTCTCCACTGCCTTACGCCAGGCTGTCGTCCGTACGCCCTGGTATGCCAAACGCAAGAGCTACAAAGTGTTGTTCTGGCGTGAAATCACCCCACTTGCTATCCCTATTTTTCTGGAAAATACCTGTGTTTTGCTAATGGGCGTGCTCAGTACTTTTCTCGTCAGTTGGCTGGGCAAGGAAGCAATGGCGGGCGTGGGGCTTGCCGACAGTTTTAATATGGTAATTATGGCTTTTTTTGCGGCTATCGATCTTGGTACTACGGTGGTGGTCGCCTTTAGCCTCGGCAAGCGCGACAGGCGACGCGCAAGGGCGGCGGCGCGCCAGTCGCTGGTGATTATGACGCTATTTGCCGTTGTGCTG…	ATG	TAA
SL1344_2441	ATGAAATTTACTCTCGTTGCGACGGTTCTACTGACGTTTTCCCTTTCAGCTTTTGCCGTTGAGTATCCTGTATTGACCACCGCGAGCCCTGATCAGGTGGGGTTTGATAGCCAAAAACTTCACCGACTTGATGGCTGGATTCAAAATCAAATTGATGCCGGATATCCCAGCATCAATCTTCTGGTGATAAAAGATAATCATATTGTTCTACAAAAAGCCTGGGGCTATGCCAAAAAATATGACGGTTCCACGCTGTTAGCCCATCCCATTCGGGCGACCACTAACACGATGTATGATCTGGCTTCAAACACAAAAATGTATGCCACTAACTTCGCATTGCAAAAACTAGTGTATGAAGGAAAAATAGATGTCAATGATTTGGTATCAAAATATATCCCC…	ATG	TAA
SL1344_2722	TTGCGCCCGTCATATCACCGCACCGGTACTGCACTGAGGGAGAAAATAAACATGAAAATGAACGTAACGGAAACGGTAAAACAGGCCTGCGGCCACTGGTCGCGTATTCTCCCGGCGCTGGGTGTGAAGGTGATTAAAAACCGCCATCAGGCCTGTCCGGTGTGCGGCGGCTCTGACCGTTTCCGCTTTGACGATAAAGAGGGACGCGGGACGTGGTTCTGCAACCAGTGCGGCGCGGGTGACGGGCTTAAGCTGGTTGAGAAGGTATTTGGCGTGTCGGCCTCCGAGGCCGCCGGAAAGGTGAACGCCGTGACCGGCAATCTGCCGCCGGTTGCCCCGGAAGTGATTGCGGCCGCAGAAGCAGAAACGGAGGCTGACCGCAAAGCGGCGGCCGCGCTG…	TTG	TAA
dnaG	ATGGCTGGACGAATCCCACGCGTATTCATTAATGACCTGCTGGCGAGAACCGATATCGTCGATCTGATCGACGTGCGCGTAAAACTCAAGAAACAGGGCAAGAACTATCACGCGTGTTGTCCATTCCATAATGAGAAAACCCCTTCTTTCACCGTAAACGGTGAAAAACAGTTTTATCACTGCTTTGGATGCGGCGCGCATGGCAATGCGATCGACTTTTTGATGAATTACGACAAGCTCGAATTTGTCGAAACCGTCGAAGAATTAGCGGCCATGCATAACCTGGAAATTCCCTATGAAGCAGGCACCGGGCTTAGCCAGATAGAGCGCCATCAACGGCAAAACCTCTATCAGTTGATGAATGGTCTGAATGACTTTTATCAGCAGTCGCTTACCCAT…	ATG	TGA
ompA	ATGAAAAAGACAGCTATCGCGATTGCAGTGGCACTGGCTGGTTTCGCTACCGTAGCGCAGGCCGCTCCGAAAGATAACACCTGGTACGCTGGTGCTAAACTGGGCTGGTCTCAGTACCATGACACCGGCTTCATTCACAATGATGGCCCGACTCATGAAAACCAACTGGGCGCAGGTGCTTTTGGTGGTTACCAGGTTAACCCGTATGTTGGCTTTGAAATGGGCTACGACTGGTTAGGCCGTATGCCGTACAAAGGCGACAACATCAATGGCGCTTATAAAGCTCAGGGCGTTCAGTTGACCGCTAAACTGGGTTATCCAATCACTGACGATCTGGACGTTTATACCCGTCTGGGTGGTATGGTATGGCGTGCAGACACCAAGTCTAACGTCCCTGGC…	ATG	TAA
SL1344_2210	ATGAGGCATTTTAAAAATTTCACTAAAACAACGGAATTAACCCTTGTTCAGCAGAAATTATCAGAGAATTGCAGTATTCAGTTTATCCAGGATGAATCAGGTGTTGACTGGTATGTGTTACAGAAGTTATTCCAGCCCGATACGCTGAAAATCCAGTATGACAAAACAGGGCTGATTATTGCTGCGGATAAAGATGCGACTAAGCTATTTCCGCTGAATTGCTCTGTTGTGGAATTCGCTGATACTGATATTCCCGATGGTTTTCAGCCTGGGAATTTTACCTACAGCAACGGCGTTATTGCCCCTGTTCAGATTGATTATGTTGCTTTAGCTACGGCAGAGCGCGACAGGCGTATGACGTCGGTCACAGCAAAAATCAATCAGCTTGTAGAAGCTCAG…	ATG	TAG
tatD	ATGGGGGCAAGCATGTTTGATATTGGCGTTAATTTAACCAGTAGCCAGTTTGCAAAAGATCGTGATGATGTGGTCGCCCGTGCGTTTGCGGCGGGAGTAAAAGGTATGCTACTGACCGGAACGAACATCCATGAAAGTCAGCAGGCGTTAAAACTGGCGCGGCGCTACCCCCATTGTTGGTCGACGGCTGGCGTCCATCCCCATGACAGCAGTCAGTGGTCACCCGCGTCTGAAGACGCCATTATTGCGCTGGCGAACCAGCCGGAAGTCGTCGCTATCGGTGAGTGCGGGCTGGATTTCAATCGCAATTTTTCCACGCCGCAGGAGCAGGAGCGTGCCTTTCAGGCGCAGCTACAAATTGCCGCCGAATTGCAGATACCAATCTTTATGCACTGCCGG…	ATG	TGA
syd	GTGGACGAACTGACAGCGCAGGCATTGAAAGCCTTTACGACGCGTTACTGCGATGCGTGGCAAGAAAAACACGGTAGCTGGCCGTTGAGCGAAGAACTGTATGGCGTACCTTCTCCGTGCATTATTTCTTCAACCCGCGATGCCGTTTACTGGCAGCCGCAACCTTTTGAAGGCGAAGAAAATGTAAACGCGGTTGAACGCGCCTTTGATATTATGGTACAACCTGCGCTCCACGCGTTTTACACCACGCAGTTTGCTGGCGACATGCCCGCGCAGTTTGCGGATGAAAAGCTTACGCTACTGCAAACCTGGAGTCAGGATGACTTTCGGCGCGTGCAGGAAAATCTGATAGGCCACCTGGTCACGCAAAAGCGGCTCAAGCTTCCTCCCACGCTTTTT…	GTG	TAA
rnr	ATGTCACAAGATCCTTTCCAGGAACGCGAAGCAGAAAAATACGCGAATCCTATCCCGAGCCGGGAATTTATCCTCGAACATTTAACGAAACGTGAAAAACCGGCCAGTCGCGAAGAACTGGCCGTAGAACTGAATATTGAAGGCGAAGAGCAGCTTGAAGCCTTGCGTCGCCGCCTGCGCGCGATGGAGCGCGACGGACAACTGGTCTTTACCCGCCGCCAGTGCTATGCGCTGCCGGAACGCCTCGACCTGCTGAAAGGCACCGTGATCGGTCATCGTGATGGTTACGGTTTCTTACGTGTCGAAGGCCGCAAAGACGATCTGTATCTTTCCAGCGAGCAAATGAAAACCTGTATTCATGGCGATCAGGTGCTGGCGCAGCCGCTGGGCGCCGATCGT…	ATG	TGA
nagD	ATGACCATCAAGAATGTAATCTGCGATATCGACGGCGTGCTGATGCACGACAACGTAGCCGTACCCGGTGCGGCGGAATTTCTGACGGGGATTCTGGAAAAAGGTCTGCCGCTGGTGCTGCTGACCAATTACCCATCGCAAACCGGCCAGGATCTGGCGAACCGTTTTGCTACCGCTGGCGTTAACGTGCCGGACAGCGTGTTTTATACGTCAGCAATGGCGACAGCCGATTTTCTGCGCCGTCAGGAAGGTAAAAAAGCGTATGTCGTGGGCGAAGGCGCGCTTATTCACGAGCTCTATAAAGCGGGTTTTACCATTACCGATGTGAACCCTGATTTTGTCATCGTTGGAGAAACCCGCTCCTACAACTGGGACATGATGCATAAAGCAGCATTTTTC…	ATG	TAA
gtrA	ATGATAAAATTATTTATAAAGTACGTTTCGATAGGCGTACTTAATACTGCTTTGCATTGGGCTATCTTTGCCCTTTGCGTCTATGGATTTCAAACAAGTCAGGCTTTGGCAAACGTAGCGGGCTTTGCTGTCGCTGTCAGTTTTAGTTTTTTCGCTAACGCCCGGTTTACCTTTGGAGCCAGCGTATCAACCGGACGTTATTTGCTGTACGTCGGTTTTATGGGCGTGCTGAGCGCCGTCGTGGGATGGACAGGCGACAAGTGTGCTATGCCTCCCATTTTTACGCTCATTGTATTTTCCGCAATTAGCCTTATTTGCGGATTTTTATATTCCAGATTCATTGTTTTCAGGAATGAGAAATGA	ATG	TGA
SL1344_1635	TTGAAACCTTTTCTGACATTAAGGATGACAAACATGTCTGATATCGAAGCACAACGAATTGCCGCACGCATTGATACCGTGCTGGATATCCTTGTTGCTGGCGATTACCACTCGGCCATCAATAACCTTGAAATATTGAGAGCAGAGCTGTTAGATCAGGTTAAAGACGGTATCTCGCCATCCCAGGCTCCCGGGTCGCCCTGGGAAATCTGA	TTG	TGA
phnT	ATGCTGATGAAAACGACCACCGTTCACGCCCCTGCATCGCAGGGGACATCGGGGATAGTCCTCGACTCGCTGCGCGTTGCGTATCACGGCAACGTGGTGCTTAAACCGCTCTCTTTGACGATTGAACCTGGCGAAGTGCTGGCGCTGATTGGCCCATCAGGATCTGGAAAAACGACGGTGCTGCGTGCGGTTGCGGGCTTTGTGCAACCTGCAGGCGGTCGTATTCTGATTGGCGATACGGACGTCACCCATCTGCCACCCTATAAACGCGGGTTGGCGATGGTGGTGCAGAACTACGCCTTGTTCCCGCATCTGAAAGTGGAAGACAACGTCGCTTTTGGCCTGCGTGCGCAGAAGCAGCCAAAGGCGCTAATTAATGAGCGTGTAACGCAGGCGCTG…	ATG	TAA
SL1344_1394	ATGAATGATAAAATCCGCGTTGGGTTAATCGGTTATGGCTACGCCAGTAAAACCTTTCATGCGCCCTTAATTATGGGAACGCCAGGGCTAGAGCTTGCGGCGGTATCCAGCAGCGATGAAACAAAAGTGAAAGCAGATTGGCCGGCGGTTTCCGTGGTCTCTGAGCCCCGACATTTATTTAACGATCCGCATATCGACCTTATCGTGATCCCGACGCCCAACGATACCCATTTCCCGCTGGCGAAAGCTGCGCTGGAAGCCGGTAAGCATGTGGTGGTTGATAAACCCTTTACCGTGACACTGTCACAGGCGCGAGAATTGGATGCGCTTGCGCGGAGCACTGGTCGGGTACTTTCCGTCTTCCACAACCGACGCTGGGACAGCGATTTTTTGACGCTG…	ATG	TGA
stfA	ATGAATACAGCAGTAAAAGCTGCGGTTGCTGCCGCACTGGTTATGGGTGTTTCCAGCTTTGCCAATGCTGCGGGCAGTAATACTGGTACGGTGACTTTTACCGGTACTATTGAAGATTCACCGTGTTCAATCGTGGTTGGCGACGAACACCAGACCGTTAACCTGGGCCATATCGGTACCGGTTCTCTGATGGGCGGTAAAGAATCTTCAAAAGTCGATTTCCATATCGGTCTGGAAAACTGCGCATTCACCACTGAGAAAGAAGCGTCTACCGTTTTCTCTGCCATCGGTAACGAATCCAGCGCTAATCCGGGCAGCGTTGCGCTGATGCGTATCGGCGGCGGCGAAATGGCGGGTTCCAGCATTGTTATCGGCAACCACCTGGGTTCCGCGATCAAA…	ATG	TAA
SL1344_2558	ATGGACCAGATAGCGAACCTGGTCATTGATTTAAGTATCGACAGCGCAGAGTTCCGAAACGAAGTTCCGCGCATTAAAAAATTGCTGAACGATGCGGCTGGTGACTCAGAACGTTCAGCGGCCCGGATGCAGCGTTTTCTGGATAAGCAGACGGAGGCGACGCGCCGGACGTCCGCCAGTCTGGATCAAGTGACTGCCAGCAGTACCGCGTACAGTTCCGCTGTGGAGAAAAGCGCAGCGGCCAGTACGCGTCTGGCGGCGGATGTGGATCAGACGCGACAGAGGGTGGAGGCACTGGGAAGGAAACTGCGTGAGGAACAGGCGCAGTCAGCGGCTGTGGCGGCAGCACAGGACAGGACAAGTGCTGCTTTTTACCGCCAGATTGACAGTGTAAAACAG…	ATG	TAA
SL1344_1173	ATGTTCAAGCCGCACGTGACCGTTGCCTGCATCGTACATGCCGAAGATAAATTTCTGGTGGTAGAAGAGACCATCAACGGTAAATCGTTATGGAATCAACCTGCCGGACACCTGGAGGCAGATGAAACGCTGGCGCAGGCCGCCGCGCGTGAACTGTGGGAAGAGACTGGCATCACGGCGCAACCACAGTATTTTATCCGTATGCATCAGTGGATTGCGCCGGATAAAACCCCGTTCCTGCGCTTTTTATTCGCTATCAAGCTTGATCATATTTGCGCGACCGACCCCCATGACAATGACATCGATTGCTGCCGTTGGGTGAGCGCCGACGAGATTCTGAACGCGCCGAATTTACGTTCTCCGCTGGTGGCTGAAAGCGTTCGCAGTTATCAAACGGGA…	ATG	TAA
SL1344_2440	ATGTCGCAAACCATTACGCTTATTAAGGATAAAATTCTTTCTGATAATTATTTTACTCTGCGCAACATTACCTATGACCTGACCCGTCGTAATGGCGAGGTTATCCGTCACAAGCGTGAGGTTTACGATCGCGGGAATGGCGCAACCATTCTGCTTTACAACTCAACTAAAAAAACCGTGGTTCTGGTTCGCCAGTTTCGCGTGGCGACATGGGTCAACGGTAATCAAGACGGTATGTTAATTGAAACCTGCGCTGGCCTGCTTGATAACGACGAGCCGGAGGTCTGTATCCGTAAAGAGGCCATTGAAGAGACAGGGTATGACGTTGGTGAGGTACGCAAGATATTTGAGCTTTATATGTCGCCAGGCGGCGTCACGGAGCTGATTCATTTCTTCATT…	ATG	TGA
rpsU	ATGCCGGTAATTAAAGTACGTGAAAACGAGCCGTTCGACGTAGCTCTGCGTCGCTTCAAGCGTTCCTGCGAAAAAGCAGGTGTTCTGGCGGAAGTTCGTCGTCGTGAGTTCTATGAAAAACCGACGACCGAACGTAAGCGCGCTAAAGCTTCTGCAGTGAAACGTCACGCGAAGAAACTGGCTCGCGAAAACGCACGCCGTACTCGTCTGTACTAA	ATG	TAA
SL1344_1009	ATGAAATATCAACAACTTGAAAATCTTGAAAGCGGTTGGAAATGGAAATATCTGGTGAAAAAGCACCGCGAAGGGGAGCTGATCACCCGCTACGTGGAAGCCAGTGCTGCCCAGGAAGCCGTCAATTTGTTGTTGGCCCTCGAAAATGAACCGGTGCGGGTAAATGTCTGGATAGACAGGCATATGAATCCTGCCTTGCTTAATCGGATGAAACAAACCATTCGGGCAAGACGCAAACGACACTTCAATGCGGAACATCAGCATACGCGCAAAAAATCTATCGATTTAGAGTTTATGGTCTGGCAGCGTCTGGCGGGCCTTGCGCAGCGACGCGGTAAAACATTATCCGAAACGATTGTGCAACTGATAGAAGACGCGGAGCATAAAGAGAAATATGCC…	ATG	TAA
SL1344_2209	ATGAGCATAATATGTTTTTCCTCGACATCAAACACATATTTTTCAGAGGAGAACATTCCAGCTTATAAGGCCAGTGGGTTGTGGTCGAATGATTTTTATGCTCTGACCGATGAAGAAGTTGATAAGTATTATATGAAAACTCCACCAAAGGGAATGTATCTCGGTTCATCAAATGGACGTATTGCCTGGGTTTGTATTCCACCTCCAACGCAAGATGATTTAATTTCTGCCGCAAATCAGGAAAAGAAGAAGAGAATCGATCAGGCCAACGAGCACATGAACAGCAGGCGGTGGCCGGGCAAAGCGGCGCTCGGGCGCCTGACGGGCGACGAACTGGCGCAGTACAATCTGTGGCTGGATTATCTCGATGCGCTGAAAGCGGTTGATACATCGGTTGCA…	ATG	TAA
tatC	ATGGCTGTAGAAGATACTCAACCGCTTATCACGCATCTGATCGAGTTGCGTAAGCGCCTGCTAAACTGCATCGTCGCAGTACTTCTGATTTTTCTGGCGTTAATTTATTTCGCCAATGATATTTATCATTTAGTCGCCGCACCGCTGATTAAACAGATGCCGCAAGGGGCGACAATGATTGCGACGGATGTGGCGTCGCCGTTTTTTACGCCTATCAAACTCACCTTCATGGTGTCTTTGATCTTATCCGCGCCTGTCATTTTGTACCAGGTTTGGGCCTTTATCGCCCCGGCGCTGTATAAGCATGAGCGTCGTCTGGTCGTACCTCTGCTGGTATCCAGCTCGCTGCTTTTCTATATTGGTATGGCCTTCGCCTATTTTGTCGTATTCCCTTTGGCC…	ATG	TAA
SL1344_2946	ATGACGACTCATGACCGTGTGCGTCAGCAGTTACATACGCTTGAAACGCTGCTGCGCGAGCATCGCCACTGGCGGCAGGATGCGCCGCAGGCGCACCTGTTTACCAGCACCCAACCATTTTTTATGGATACCATGGAACCGCTGGAATGGCTGCAATGGGTATTGATCCCACGTATGCATACCCTACTTGATAATGCGCAGCCGCTGCCCGAGGCGTTTGCCGTCGCCCCTTATTATGAAATGGCGCTGGCGGCGGATCATCCGCAGCGGGAGACGATCCTGGCGGTTTTGCAGGATCTGGATGCGCTATTCGCCCGCGATAAATCCTGA	ATG	TGA
SL1344_4300	GTGCAGTTAACGAGTTTCACCGATTACGGCTTACGTGCGCTAATCTATATGGCGTCGTTACCAGATGGACGAATGACCAGCATTTCTGAGGTGACAGAAGTCTACGGCGTGTCCCGTAATCATATGGTCAAAATTATCAATCAGCTTAGCCGGGCGGGCTTTGTCACCGCCGTTCGGGGAAAAAATGGCGGTATCCGCCTGGGTAAACCGGCTAATACTATTTGTATTGGCGATGTGGTGCGTGAGCTGGAACCCTTATCACTGGTCAACTGTAGCAGCGAATTTTGCCACATCACCCCTGCCTGTCGTCTGAAACAGGCGCTTTCTAAGGCCGTGCAGAGTTTTCTCAAGGAGCTGGATAACTACACGCTTGCCGATTTGGTTGAAGAGAATCAACCG…	GTG	TGA
SL1344_4502	ATGAAAAAATTATTAATAGCGACCTCTGTCATAATAGGATTATCAACTTCAGCGCAAGCGGTTGAATCCACTGCTGTATTAAAACTGACTGGCGTTTTAACCAACGGCGCATGTATACCAGAGTTAAGTGATGGTGGCGTTGTAGATTTCGGTACTAAGGCCGTTAGCGATCTGCTGCCAACTCAGACGAATCAACTGGGATACAAAGATATAACACTCACGATTCAGTGCCTTGCACCGGCAAAAGTTGGCTGGGTCGCTACCGACAATCATGGCGATTCGGCGACAACGCTGACTATCGATAACGCAACATTTGGCGGTCAGAACAATAGAATACCAAACTATCAGCTAGGCCTGGGTACAACAGCAGATGGTATCAAGATTGGTGCATACGGCCTC…	ATG	TAA
asnB	ATGTGTTCTATTTTCGGCGTATTCGATATCAAAACAGATGCAGCGGAACTGCGTAAAAAAGCCCTTGAACTGTCACGCCTGATGCGCCATCGCGGCCCGGACTGGTCCGGCATCTACGCTTGCGATAACGCGATTCTCGCACATGAACGCTTGTCGATTGTTGATGTTAACGCTGGCGCCCAGCCCCTGTATAACGCCAGAAAAACCCACGTACTGGCGGTGAACGGTGAAATTTATAACCATCAGACGTTACGCGCGGAGTATGGCGATCGTTACGCGTTCCAGACAGGCTCCGACTGCGAAGTTATTCTCGCGCTGTATCAGGAAAAAGGGCCGGATTTCCTTGACGATTTACAGGGGATGTTCGCCTTCGCCCTGTATGACAGCGAAAAAGACGCT…	ATG	TAA
SL1344_1634	ATGATGAAACAGATTCAGGAACAAACGGCGCTAAATCCCCTTCACTCTCACTGGCGTCTGGCTGATGACCGCAACGTGCTGTATCTCTCCCCGACAGGTGAAACGGATGCAGAAAAAACGGTTGAGCTATCGCCGGAACAAGCCGGGCGTATCCGGGAAATAACGGCGATTACGTCCAGTCTGCTGATAACGTTGTTGATAGAAAAACAGGTTACCGCTGTGCACCTGGTAGGCCGTAAGATTAATAACCGTGAATGGGCTGGCAGCCTGGCAACCTGGCCTGATACGCCTGCCGTCTCGCCAACGCAGGCGCAGGAGCTCTCTTTTGCCGAGCAAATCGTATCAGAAGCCAACTCAGTCATTGCGATACTGGATAGTCGGGGAAAAATCTGTCGATTT…	ATG	TAA
phnU	ATGTCACTCATTTTACCTCTGGAAAAACCGGCGCTTAACCTACGCCCGCTGCTGTGGCTGCTGCTCCCGTTGCTGGTGCTGGCGACGCTGTTTTTCTGGCCTCTGTCGCTCATCGTTGAACAGGCGCTACGCGGTGCCAATGGCGAGATCGGGCTCGAGACCTTCCGCCAGGTGGTCGACTCGAAACGCTTTGTCGGCGCGTTGCTGAACACGTTGCAAATCGCCTTTTTCGCCACCGCCGGTTGCCTGCTGCTGGGCAGCGTGATGTCGCTGATTCTGGTGTTTATTCCTTTCCCCGGCAGCGAGTTGATTGGTCGGGTCGTCGATACTTTTATTGCGCTGCCGACCTTCCTGATTACGCTGGCGTTCACCTTTATTTATGGGTCAGCGGGTCTGCTC…	ATG	TAG
SL1344_1393	ATGGATCAACTTTATATGACTGTTCAGGATTATCTATTAAAATTCCGCAAAATTAGTTCGCTCGAAAGTCTGGAAAAACTGTTCGACCACCTTAACTATACCCTTACTGATGACATGGACATTGTTAATATGTATCGCGCTGCAGATCACCGCCGTGCCGAACTGGTTTCCGGAGGACGCCTGTTTGATGTAGGTCAGGTTCCGCAATCCGTCTGGCGCTATGTGCAATAA	ATG	TAA
SL1344_2557	ATGGAAACATTTAACTGGAAGATCCGCCCTGATATGACAGTGGAATCAGAACCAAAAGTCACCTCCATAAAACTGGGTGACGGGTATGAACAACGGCGTCCAGCCGGGCTGAACAACCATCTGGCGAAGTATAACGTAACGGTCCGGATTCGTAAGGGAGAACATCAGAACCTTGAGGCATTTTTATCCCGCCACGGTGGAGTGAAATCCTTTCTCTGGACGCCGCCTTATACCTGGACACAAATTCGGGTGATTTGCCGCAAATGGTCGATTAACGTTGGCTCTCTTTGGGTGACTGTGACCACGACTTTTGAACAGGTTGTTATCTGA	ATG	TGA
hsdM	ATGAACAATAACGATCTGGTCGCCAAGCTGTGGAAACTGTGCGACAACCTGCGTGACGGCGGCGTCTCCTATCAAAACTACGTCAATGAACTCGCCTCGCTGCTGTTTTTGAAAATGTGCAAAGAGACCGGCCAGGAAGCGGACTACCTGCCGGAAGGCTACCGCTGGGATGACCTGAAATCGCGTATTGGCCAGGATCAGATGCAGTTCTACCGCAACCTGCTGGTTCAGTTAGGCTCAGATGAGAAAAAGCTGGTGCAGGCGGTATTCCATAATGTCAGCACCACCATTGAGCAACCCAAACAGCTGACTGAGCTGGTCAGCTATATGGATGCGCTGGACTGGTACAATGGCAACCACGGGAAATCCCGCGACGACTTCGGCGATATGTACGAAGGG…	ATG	TGA
SL1344_1989	ATGCCATACGTAGGGGCTCCATTTTCTCAGCGAACCGTGAAGCCTCCGATTAAGCCCCCAAAAACCATGGATGTCAAAAAACCCGGTAAACCTTCTCAGGTCAACCGGGTAAAGATAATTTATTGTTTTTTAAACGTCTCCGGACTCACCAGGATATCCCGAAACTAA	ATG	TAA
SL1344_2439	ATGCGCTACCGCGTTATTCTTTTTTGTCTGTTTGGCCTGTTGCCGGTCCAGCTACTGTGGGCTGCGCCAGCGCAACGGACTTTTTCCGACTGGCAGGTCACCTGCAATAACCAAAATTTTTGCGTAGCGCGCAATACTGGCGAACATCATGGGCTGGTGATGACATTAAGCCGCAGCGCCGGGGCGCGTACCGATGCGGTACTGCGTATCGACCGCGGCGGTTTGGCGCCGCCCGACGCTAAAGAAGCCGCAATTGCGCCTCGCTTATTGCTGGATGGCAAACCGCTTTCGTTCAACAGTCCACACTGGCGCGTGTCGCCCTGGCATCTCATGACCGGCGATCCTGCCACCATCACCGCATTTTTACAGACGATTCAGGATGCGCAGGCCATCACCTTA…	ATG	TGA
SL1344_2721	ATGAAAAATCCATTACCGCCCGTATTACGCGCCGCGCTGTATCGTCGCGCCGTGGCCTGTGCCTGGCTGACCCTGTGCGAACGCCAGCACCGCTATCCGCACCTCACCCTCGACGCGCTGGAAAGCGCCATTGCCGCCGAGCTGGAGGGCTTCTACCTGCGCCAGCACGGAGAGGAAAAAGGCCGCCAGATTGCCTGTGCACTGCTGGAAGATTTAATAGAAGCCGGGCCACTTAAGGCCGCACCGTCGCTGTCCTTTCTCGGGCTGACCGTGATGGATGAGCTTTGCGCCCGTCATATCACCGCACCGGTACTGCACTGA	ATG	TGA
SL1344_3182	ATGCGTGTACTGGGTATTGAAACATCCTGCGATGAAACCGGCATCGCTATTTACGACGACAAAAAGGGTCTGTTAGCCAACCAATTGTATAGTCAGGTGAAATTACATGCTGACTACGGCGGCGTAGTGCCTGAACTGGCTTCCCGCGATCATGTGCGTAAAACCGTGCCGCTGATTCAGGCGGCATTAAAAGAAGCCGGTCTGACGGCGAGCGATATCGACGCGGTGGCCTATACCGCAGGCCCGGGCCTGGTCGGCGCGCTGCTGGTCGGCGCAACCGTCGGGCGTTCACTGGCATTTGCCTGGAATGTGCCGGCCATTCCTGTACACCATATGGAAGGTCATCTGCTGGCGCCAATGCTGGAAGATAATCCCCCGGAATTCCCGTTTGTGGCGCTA…	ATG	TAA
SL1344_1008	ATGCTGACTAAAGCGCCTGAAGAGCAAGAGTATCTCACTTTACTTTCAGATGCCGTCCGCGCTCTGCAAACCGATGCCGGACAATTAACCGGCGGACATTATGACGTTTCCGGGCATACTGTTCATTACCGCGCCGCGCAGAATGCGCAAGACAACTTTGCCACCGTCACACAAGTCGTCAGCGCGGACTGGGTCGAAGCCGAACAGCTCTTTGGTTGCCTGCGGCAGTATAACGGCGACATTACCCTGCAGCCGGGACTGGTTCATCAGGCAAACGGCGGCGTGCTGATTATTTCCTTACGAACCCTTCTGGCGCAGCCGTTACTATGGATGCGTCTGAAAGCCATCGTTAGCCGCGAGCGTTTTGACTGGGTGGCCTTTGACGAGTCGCGTCCATTA…	ATG	TGA
SL1344_2208	ATGATCTACAAGAAATTCAGACTCGATATAAATGGGCTAAGAGCTTTTGCATTGATAAGTGTTGTGCTGTATCACTTCGGTGTACCTTATGTGTCAGGTGGCTTTATAGGTGTAGATGTTTTCTTTGTAATTTCTGGTTTTCTTATGACTGGAATTGTCCTTGAACGCGTAGACCACAAAGGAGTACTTGATTTTTATATTGCAAGATTCCTAAGAATTGTACCAGCTCTGGTATTTGCAATTCTCTTGTTGATGATTTTCGGTTTATTTACACTAAGTACAAATGAATACGAAGCACTTAGCAAGAACGCAATATCGTCTTTACTTTTTTATTCAAATAATTATTACGCAATTCACTCTAGTTATTTCGACTCATCATCAGAGTTCAACTTTTTGCTT…	ATG	TAA
tatB	GTGTTTGATATCGGTTTTAGCGAACTGCTGTTAGTGTTCGTTATCGGCCTCATTGTGTTGGGGCCGCAACGATTGCCAGTAGCGGTAAAAACGGTAGCGGGCTGGATTCGCGCGTTGCGGTCCCTTGCGACAACGGTTCAGAATGAACTGACTCAGGAACTGAAACTTCAGGAGTTCCAGGACAGTCTGAAAAAAGTCGAAAAGGCGAGCCTGGAAAATCTGACTCCCGAACTGAAAGCATCTATGGATGAACTGCGTCAGGCGGCGGAGTCGATGAAACGCACCTACAGCGCTAACGATCCCGAACAAGCGAGCGATGAAGCGCATACCATCCATAATCCGGTGGTAAAAGGGAACGAAACGCAGCATGAGGGCGTCACCCCTGCCGCCGCTGAAACA…	GTG	TAA
yqcB	ATGCTGGAGATCCTCTATCAAGACCCGTGGCTGGTTGCCGTGAATAAACCCGCAGGCTGGCTTGTTCACCGGAGCTGGCTGGATCGCGACGAAAAAGTCGTGGTCATGCAAACGGTGCGCGACCAAATCGGCCAGCATGTTTTTACCGCCCACCGTCTCGACAGGCCCACGTCGGGCGTACTGTTAATGGGGCTGTCCAGCGAAGCGGGACGCCGTCTGGCGCAGCAGTTCGAGCAGCACCACATCCGTAAACGCTACCATGCCATTGTGCGCGGCTGGCTGATGGATGACGCGGTACTGGATTATCCGCTGGTGGAAGAGCGCGATAAAATTGCCGATAAATTCGCCCGCGAAGATAAAGCGCCCCAGCCGGCCGTAACGCAGTATCGCGGGCTGGCG…	ATG	TAA
purA	ATGGGTAACAACGTCGTCGTACTGGGCACCCAATGGGGTGACGAAGGTAAAGGAAAGATCGTCGATCTTCTGACTGAACGGGCTAAATATGTTGTACGCTACCAGGGCGGTCACAACGCAGGCCATACTCTCGTAATCAACGGTGAAAAAACCGTTCTCCATCTTATTCCATCAGGTATTCTTCGCGAGAATGTAACCAGCATCATCGGTAACGGTGTTGTGCTGTCTCCGAGCGCGCTGATGAAAGAGATGAAAGAACTGGAAGACCGTGGCATCCCCGTTCGTGAGCGTCTGCTGCTGTCTGAAGCCTGTCCGCTGATCCTTGATTATCACGTTGCGCTGGATAACGCGCGTGAGAAAGCGCGTGGCGCGAAAGCGATCGGCACCACCGGGCGTGGA…	ATG	TAA
SL1344_0661	ATGAATTACCAGTTTTGTTGGTATCTCTTTTTGCGGCCATTAACATTTTTTATGGTCGTCTTGCTCTGCGCTTTCACCTTCATTGATATCACGGCCAGCGCCGCCTGGTTGATTATTTTGGGTCTGGTTTACCCCGTGGCAGTGTCAATGAGGCTACATATACTGCACCAGAAAAAGGCCGTCATGTTGCGCCAGAATAGTGCGGAATGGATAGTGTATCTGCCAGGGATCCCTGTGCAAGAAAAACAAAGCGCGCTGATTAATGTCGCGTTTTCCTCGAAAACGGCGCTGCGTGGATTCTATATTCGCGCCCTGTCCAGCAAAGTCATTCTTCACATCATCACTTTTTATATTCTGTGGTTTGATGTCCAACATGCAACACTGACGTGGTATCGGATT…	ATG	TAA
gtrB	ATGAAAATTTCATTAGTGGTTCCCGTCTTTAATGAAGAGGACGCGATCCCTATTTTCTATAAAACGGTCAGAGAATACAGTTCACTTAAACCTTATAACGTTGAGATTATCTTCGTTAATGATGGGAGTCACGATGCGACTGAATCAATCATCAGCGCATTAGCTGTTGCCGATCCTCTTGTTGTTCCGATCTCATTTACCCGCAATTTTGGTAAAGAACCTGCACTTTTTGCCGGATTAGATCACGCGACCGGAGATGTGGTGATCCCTATCGATGTTGATTTACAAGATCCCATCGAAGTAATCCCACATTTGATCAATAAATGGCAGGCTGGTGCAGAAATGGTGCTGGCTAAGCGTATCGATCGTTCAACGGATGGCCACCTGAAGCGTAAAAGC…	ATG	TAA
rnb	ATGTTTCAGGACAACCCGCTGCTAGCGCAGCTTAAACAGCAACTGCATTCCCAGACGCCGCGCGCTGAAGGGGTCGTAAAAGCCACGGAAAAAGGCTTTGGCTTCCTTGAGGTTGACGCGCAAAAAAGCTATTTCATTCCTCCGCCGCAGATGAAAAAAGTGATGCATGGCGATCGTATCGTCGCGGTCATCCACACGGAAAAAGAACGTGAGTCTGCCGAGCCGGAAGAACTGATCGAACCGTTCCTGACGCGTTTTGTGGGAAAAGTTCAGGGTAAAAATGACCGCCTGTCCATCGTGCCGGATCATCCGTTGCTGAAAGACGCGATTCCCTGCCGCGCCGCGCGCGGCGTTCAGCATGAGTTCAAAGAAGGTGACTGGGCGGTTGCCGAAATGCGC…	ATG	TAA
phnV	ATGCTAATTTGGTCACCTAAAGGACGCGCAGCGGCGGGCGTTGTGGCTAGCGTACTGTTTATCGTGTTCTTTTTCCTGCCGCTGGCGGTGATTCTGATGTCCAGCCTTAGCCAGCAGTGGAACGGTATTCTGCCGAGTGGCTTCACGCTGAACCACTTTGTTAACGCTCTGCACGGTGCGGCATGGGATGCCCTACTTGCCAGCCTCACGATTGGCTTTTGCGCCAGCCTGTTTGCGCTGCTTTGCGGCGTTTGGGCGGCGCTGGCGCTGCGTCAATATGGGGTGAAAACGCAGAAATGGTTAAGTATGGTGTTCTATCTGCCGAGTGCGATTCCGTCAGTGTCCGTGGGCCTGGGCATTCTGGTTGCTTTCAGCCAGGGGCCATTGCAAATGAACGGC…	ATG	TAA
SL1344_3545	ATGCGCAATTTGGTTAAATATGCCGGTATTGGCCTGCTGGTTATGGGGCTTGCGGCCTGTGATAACAACGATACAAAAGCGTCGGCAGAAAGCGCCGCCGCGGAAAGCCAGGCATCCGGTCAGCCCATCAGCCTGATGGATGGCAAACTCAGTTTCTCGCTGCCGGCGGATATGACCGATCAAAGCGGTAAGCTGGGCACCCAGGCGAATAATATGCACGTTTATTCTGACCCGACGGGCCAGAAAGCGGTGATTGTTATCGTCGGCGATAATACCGATGAAGCGTTGCCGGTGCTGGCAAACCGCCTGCTTGAGCAACAGCGTAGCCGCGACCCGCAGCTTCAGGTCGTCACCAATAAGTCTATTGAGCTCAAAGGCCATACGTTGCAACAACTGGAC…	ATG	TAA
SL1344_1392	ATGACTACAACACCGCCACAACGAATTGGAGGCTGGCTTCTTGGCCCGTTAGCCTGGCTGTTAGTCGCGTTGTTGAGCGCCTCGCTGGCGTTATTACTCTACGTTATGGCGCTTGCCACACCGCAAACGTTCAAGACGCTTAGCGGACAGGAAACCGGTAATTTACTGCTATGGGGCATTTCATTTATTACCGCTATCGCCATGTGGTACTATACCCTGTGGTTGACGATCGCATTCTTCAAGCGCAGACGCTGCGTGCCGAAGCATTACATTATCTGGCTGCTGGTGTCGGTGTTACTGGCGGTTAAAGCATTTGCCTTTTCGCCCGTCTCAGATGCCTTTGCCGTGCGTCAGTTACTCTTCCCACTGTTGGCAACGGCGCTCATTGTGCCTTATCTC…	ATG	TAA
fhuB	GTGAGCAGAAAACGTGAAATGCCGGATGGCGGCGCGAAAAGCGTCTTATCCGACCTACGGTTCGGGCGCTTTGTAGGCCGGATAAGGCGAAGCCGCCATCCGGCGTTGCTGTTATTGGCGCTGTTTGTTGCCGCCTGCTGGCTGACATGGGTTAACTTCTCCGTTGCGCTACCGCGCAGCCAGTGGCAACAGGCTATCTGGTCACCGGATATCGACATCATTGAGCAGATGATTTTTCATTACAGCCAGCTGCCAAGACTGGCGATTTCGCTGCTGGTGGGCGCGGGGCTTGGGCTGGTAGGCGTCCTGTTCCAGCAAGTATTACGTAACCCGCTGGCGGAACCGACCACGCTGGGCGTGGCGACCGGCGCGCAATTGGGGATCACGGTGACTATGCTT…	GTG	TAA
SL1344_2556	GTGATGCAGGACATTTCGCAGGATACGCTGAACGAATCCGCTAAACTGGCGCAGTCCGCCAGGATCACTTTGTGGGAAATCGATCTGACACAGTCTGGCGGTGATCGTTATTTTTTTTGTAACGAGGCAAATGAAAAGGGGGAGGCGGTTACCTGGCAGGGACGGAAATATGACGTTTATCCTGTAGACGGTTGCGGATTTGAAATGAACGGCAAAGGCGCAGCTGCGCGCCCGTCACTGAAGGTATCCAATCTTTACGGTATGGTGACCGGAATGGTGGAGGATTTGCATAGCCTGGTTGGGGCGACGGTCATCCGCAGGATAGTATATGCCCGGTTTCTCGATGCCGTGAATTTTCAAAACGGCAACCAGGAGGCTGACCCGGAGCAGGAATCCGTA…	GTG	TAA
trmU	ATGTCAGAAAGCCCAAAAAAAGTGATCGTCGGCATGTCCGGCGGTGTCGATTCCTCCGTTTCCGCCTGGCTGTTGCAACAACAGGGTTATCAGGTAGAAGGCCTGTTCATGAAGAACTGGGAAGAGGACGATGGTGAGGAATACTGTACCGCGGCAGCCGATCTGGCTGACGCGCAGGCCGTGTGCGACAAGCTTGGCATTGAACTGCATACCGTTAATTTTGCCGCAGAATATTGGGATAACGTCTTTGAACTGTTCCTTGAAGAGTACAAAGCGGGCCGTACGCCGAATCCGGATATTCTGTGCAATAAAGAGATCAAATTTAAAGCCTTCCTTGAATTTGCCGCAGAAGATTTAGGCGCCGACTATATCGCCACCGGTCACTACGTCCGTCGCGCG…	ATG	TGA
malP	ATGTCACAGCCAACCTTCAATAAAGATCAATTCCAGGCCGCCCTGACGCGTCAGTGGCAGCGTTTCGGTTTACTGTCGGCGTCCGACATGACGCCTCGTCAGTGGTGGCAGGCCGTTAGCGGCGCGCTGGCGGAATTACTGAGCGCGCAACCGGTAGCGCAGCCGACGAAAGGCCAGCGTCATGTGAACTACATTTCGATGGAATTTTTGATTGGCCGCCTGACGGGAAATAACCTGTTAAATCTGGGATGGTACCAGGACGTTAGCGATGTACTGAAAGCGCACGATATTAATCTGACCGATCTGCTGGAAGAGGAAGTCGATCCGGCGCTCGGCAACGGTGGTCTGGGACGTCTGGCCGCCTGCTTCCTCGATTCGATGGCCACCGTCGGGCAGTCC…	ATG	TAA
SL1344_2438	ATGAAAATAAATAATGGCCCCGTATTATGCCCCCATTGTGGCTGCCTGAGCGCTTATTATGAAATAGATCGGCTGGCGGCGATAAGAGAAAAAGTGAATAAAGAAGGCGGATCAGCGGCGTGGGATTCAACATTGCAGGCGCATAAAAAAAAGGCCTTTTGCCTGATGTGCCATAAATCCATTGATGAGGTCGTCATCGGGCAGTCAGATGCGCCTGAGTCTACGAAGTAA	ATG	TAA
SL1344_3180	ATGAGTGCAATCGCGCCTGGAATGATCCTCTTCGCGTACCTCTGCGGCTCAATTTCCAGTGCCATTCTGGTTTGCCGCATCGCCGGGCTGCCCGATCCGCGAGAAAGCGGCTCCGGCAACCCGGGCGCGACGAACGTATTACGAATCGGTGGCAAGGGAGCGGCTGTCGCGGTACTTATTTTTGACATCCTTAAAGGTATGTTGCCCGTCTGGGGCGCGTATGCGTTAGGCGTTACCCCTTTCTGGCTGGGGCTTATCGCTATCGCCGCCTGTCTGGGGCATATCTGGCCGGTCTTTTTTGGCTTTAAAGGTGGGAAAGGCGTAGCAACCGCGTTTGGCGCCATCGCGCCCATCGGCTGGGATTTAACCGGCGTCATGGCAGGCACCTGGCTGCTGACG…	ATG	TGA
fabA	ATGGTAGATAAACGCGAATCCTATACAAAAGAAGACCTTCTTGCCTCTGGTCGTGGTGAACTGTTTGGCGCTAAAGGGCCGCAACTCCCTGCACCGAACATGCTGATGATGGACCGCGTCGTTAAGATGACCGAAACGGGCGGCAATTTCGACAAAGGCTATGTCGAAGCCGAGCTGGATATCAATCCGGATCTATGGTTCTTCGGATGCCACTTTATCGGCGATCCGGTGATGCCCGGTTGTCTGGGTCTGGATGCTATGTGGCAATTGGTGGGATTCTACCTGGGCTGGTTGGGCGGCGAAGGCAAAGGCCGCGCTCTGGGCGTGGGCGAAGTGAAATTTACCGGCCAGGTTCTGCCGACAGCCAGGAAAGTCACCTATCGTATTCATTTCAAACGT…	ATG	TAA
rpmC	ATGAAAGCAAAAGAGCTGCGTGAGAAGAGCGTTGAAGAGCTGAACACCGAGCTACTGAACCTGCTGCGTGAGCAGTTCAACCTGCGTATGCAGGCTGCAAGTGGCCAGCTGCAACAGTCTCACCTGTTGAAGCAAGTGCGTCGTGATGTCGCACGCGTTAAGACTTTACTGACTGAGAAGGCGGGTGCGTAA	ATG	TAA
SL1344_2207	TTGCTGGACAAACCGCTGTGTGGTGACGGTCTTCCGGCCATTAGGTTCCTGCTGTATCGAAGCATACCAGGCTATTTCAATATTGATGGTTTGCCCGGAGCAAAAGATATCATTCTGGGAGAATTGACTAAGAGGGTTCACCGGATCTTCCCCGATGCTGATGTTCGGGTTAAACCGATGATGACACTACCGGCGATCAATACTGACGCCAGCAAGCATGAGAAGGAACAGATAAGCCGTACTGTTCAGGAAATGTTTGAAGAGGCTGAATTCTGGTTAGTGAGCGAGTAA	TTG	TAA
tatA	ATGGGTGGTATCAGTATTTGGCAGTTGTTGATTGTTGCCGTTATCGTCGTACTGCTGTTCGGCACCAAAAAACTCGGTTCCATCGGTTCCGATCTTGGCGCGTCTATCAAAGGCTTTAAAAAGGCCATGAGCGATGATGATGCCAAACAGGATAAAACCAGTCAGGACGCTGATTTTACCGCTAAATCTATCGCGGATAAGCAAGGCGAAGCGAAAAAGGAAGACGCTAAAAGCCAAGATAAAGAGCAGGTATAA	ATG	TAA
SL1344_2944	ATGGCGGAAATTGGTATTTTTGTCGGGACCATGTATGGCAACTCACTGCTGGTGGCGGAAGAAGCGGAAGCGATCCTCGCCAGACAGGGCCACAGCGCGACCGTGTTTGAAGATCCTGAACTGTCCGACTGGCAGCAATATCAGGATAAGGTTGCGCTGGTCGTTACCTCGACGACCGGGCAGGGCGATCTACCGGATAGCATTGCGCCGCTCTTTCACGGCATTAAAGATACAGTCGGTTTTCAACCAAACCTGCGTTACGGGGTGATTGCGTTAGGTGATAGCAGCTACCCCAATTTCTGTAATGGCGGCAAACAGTTTGATGCCCTGTTGCAAGAGCAAAGCGCGCAGCGGGTGGGGGAGATGTTATTCATTGACGCCAGCGAACATCCGGAGCCG…	ATG	TGA
hflC	ATGCGTAAGTCAGTTATTGCGATTATCATCATCGTGCTGGTAGTGCTCTACATGTCCGTCTTTGTGGTCAAAGAGGGCGAGCGCGGCATTACGCTGCGTTTTGGTAAAGTTCTGCGTGACGATGAGAACAAACCGCTGGTTTACGCGCCGGGTCTGCACTTTAAGATCCCGTTTATTGAATCAGTGAAAATGCTTGATGCGCGTATCCAGACGATGGATAACCAGGCCGATCGCTTTGTGACTAAAGAGAAGAAAGACCTGATTGTCGACTCCTACATCAAATGGCGTATCAGCGACTTTAGCCGTTACTATCTGGCGACCGGCGGCGGCGATATTTCGCAAGCCGAAGTGCTGTTAAAACGTAAGTTCTCGGACCGTTTGCGTTCTGAGATTGGTCGC…	ATG	TAA
SL1344_4501	ATGAAAAAAATTTTGCTTATTACTGCAATTGCAGCTTCCTTTGCTACAACCAGCGTGAATGCTGACACTACTGCCGTATTAAAAGTCACCGGTCAACTGGTTGTTGGTGGTTGTACCCCAGAACTCAGCGGCGGCGGCGTGGTTGATTACGGTACTATCCGCCTCGCCACACTTTCCGCAACCGATGTAAACCAACTGGGTACTAAAGATGTCTCTCTGAGTATCTCTTGTCCGTCTGCAACCAAAGCAGCATGGACTATTACCGATGACCGTGCGGACACCCACCCAGGCGCATCCGTTATCTCCATAGCCAATGGCGATATGACTAATAGTATAGTATCTGATACCACAATGTCCTACGGCGTTGGCAAAACAACCGAAGGTGTAAAAATCGGCGCG…	ATG	TGA
yleB	ATGACAAATCAACCAACGGAAATTGCCATTGTCGGCGGGGGAATGGTCGGCGGCGCGCTGGCGCTGGGTCTGGCGCAGCAAGGGTTTACGGTGATGGTAATAGAACATGCCGCGCCTGCGCCGTTTGTGGCGGACAGCCAGCCTGACGTGCGGATTTCGGCCATTAGCGCGGCATCCGTGGCGCTGCTCAAGGGACTGGGCGTTTGGGAGGCGGTGCAGGGGATGCGTAGCCATCCTTATCGGCGACTGGAGACCTGGGAGTGGGAAAACGCCCATGTGGTGTTCGACGCCGCTGAACTCAAGCTGCCGCTGTTAGGCTATATGGTAGAGAACAACGTCCTGCAACAGGCGCTATGGCAGGCGCTGGAAGCGCACCCCGGCGTGACGCTGCGCGTTCCG…	ATG	TAA
SL1344_1632	ATGGAACAATGCCGAAAAGCGGGTAAAAGCCACTGGTATCATGAAACACAATCCACTATGTCGTCACAAACCCCGCTTTCGCTAATGCCGGAAGCCGCGTATGTTAACGATCGTTTTTTACTGGATTTAACGGTAGCAGAAACCGCGTTGACGCCTTTTGAGTCATGGTTAAAGCCCGCTCGCCAGTTGGCGGATGTCTTATTTCCCCGCACGGTTCTCAACGACCGGCTTCATACGTTTAGCGCCTATGAACGTATGAGCACCGCGCTGACCGCCGCTCAGGTATTTGGGGTTCAGCGTTTGTGTCGCTATTATGCCGCGCGTCTGGCGCCGCTACCTGGCCCTGACGCCTCAAGAGAGAGCAATCAACGGCTGGCGCAAATTACGCAATACGCTCGT…	ATG	TAA
SL1344_0419	ATGAAGTTTATCATTAAATTGTTCCCGGAAATCACTATCAAAAGCCAATCTGTGCGTTTGCGCTTTATAAAAATTTTAACCGGGAACATCCGTAACGTTTTAAAGCACTACGATGAGACCCTCGCGGTTGTCCGTCACTGGGATAACATTGAAGTTCGCGCCAAAGATGAAAACCAGCGTCTGGTGATTCGCGACGCGCTGACCCGCATCCCGGGGATTCACCATATTCTTGAAGTCGAAGATGTGCCGTTCACCGATATGCACGACATTTTCGAGAAAGCGTTGGCGCAGTATCGCGAACAGCTTGAAGGCAAAACCTTCTGCGTGCGGGTAAAACGTCGCGGTAAGCATGAGTTTAGCTCCATTGAAGTGGAGCGCTATGTTGGCGGCGGATTAAAT…	ATG	TAA
yaeB	ATGATGATCACAGGAAATGGAATAAACACTGTAACTGTCAATGGAAAAGTGAAACACATCACAGAACTGGATGATATAACACTTTGTTTAGAGTGGACAAAACTACGAGAGGAAAACAATCGTCTTTATGAAATTAATAACCAGGCAAACAGAGGATGGCGTGGTTTCATCCTAAGATTGATAGGGGTTAACCTGCCAGATAAAAGGACTGAGTTTACACAACGTCTCTTATTGACGCGCAAAATTTCGGGTTCGGTCATGAAAAAGTAA	ATG	TAA
rnfA	ATGACTGATTACCTGCTGCTCTTTGTCGGAACTGTACTGGTCAATAACTTTGTACTGGTCAAATTCCTGGGCCTTTGTCCCTTTATGGGCGTATCCAAAAAACTGGAAACCGCCATGGGGATGGGCCTCGCGACGACCTTTGTCATGACGCTGGCGTCGATATGCGCCTGGCTTATCGACACCTGGATACTTATTCCGCTGGATCTGATTTATCTGCGGACGCTAGCCTTTATCCTCGTCATTGCTGTGGTCGTGCAATTTACCGAAATGGTTGTGCGGAAAACCAGCCCGGCGTTATACCGCTTGTTAGGCATCTTCTTACCACTGATTACCACTAACTGTGCGGTTCTGGGCGTAGCGTTACTGAATATTAATCTCGGTCATCACTTTCTTCAGTCG…	ATG	TAA
SL1344_2555	ATGAAAGAACAGGATATTCTGGCGCACGCCCGACGGTGTGCGCCTGCGGAGTCGTGCGGCTTCGTGGTGAGAACACAGGCGGGAGAACGGTATCTCCCCTGTGTGAATATTTCTGCCGCGCCGGAGGATTATTTCCGTATGGCGCCGGAGGACTGGCTGAGGGCTGAAACGCAGGGGGATATTGTGGCGCTGGTTCACAGCCATCCTGGCGGCCAGCCGTATCTGAGCGATGTGGACCGCAGGCTGCAGGTTCAAAGCGACCTGCCGTGGTGGCTGGTATGCGCCGGCCAGGTACATAAATTCCGCTGTGTGCCACACCTGACCGGACGGCATTATAAACATGGGGTTTTTGACTGTTACACGCTGTTCCGTGATGCCTATCATCTGGCGGGGATTGAT…	ATG	TAG
hsdS	ATGAGTGGGGGGAAATTGCCGGAGGGGTGGGCTACAAGCACAATCAATGAAATGTGCAACCTCAATCCCAAACTTAAACTTGATGATGATTTAGATGTTGGATTTATGCCGATGGCCGGTGTTCCAACAACCTATTTAGGTAAATGTAACTTTGAAACCAAAAAGTGGAGTGAAGTAAAAAAAGGATTTACTCAATTTCAGAACGATGATGTTATTTTTGCCAAAATCACGCCATGCTTCGAAAATGGAAAAGCTGTTGTAATCAAAGAATTCCCTAACGGCTATGGTGCCGGTAGCACTGAATATTATGTTCTTCGGTCTATTAATGGGTTAATTAATCCCCATTGGTTGTTTGCTTTAGTTAAAACTAAAGATTTTTTAACTAATGGAGCACTTAAT…	ATG	TGA
tktB	ATGTCCCGTAAAGACCTTGCCAATGCGATTCGTGCGCTGAGCATGGATGCCGTTCAAAAAGCCAATTCCGGGCACCCCGGCGCGCCGATGGGGATGGCGGATATCGCTGAAGTGCTATGGAACGATTTTCTTAAACATAACCCCACCGATCCGACCTGGTATGACCGTGATCGTTTTATCCTTTCCAACGGTCACGCCTCCATGCTGCTCTATAGTCTGCTGCATTTAACCGGGTATGACCTGCCGCTGGAGGAGTTAAAAAACTTCCGTCAACTGCACTCTAAAACGCCAGGTCACCCGGAGATTGGCTATACGCCCGGCGTTGAAACCACCACCGGACCGCTGGGCCAGGGGCTGGCGAATGCCGTCGGGCTGGCGATTGCCGAGCGTACGTTAGGC…	ATG	TAA
SL1344_1988	ATGATTTTTTGTGAGAATACCGCAAGCCAGTTTGGGATTGGTGTTGCAGATTTCGGGGCTGTTGTTGCTTTGGCATCAGGTCGTAATAATCTTTGGACAAGGGCGAAACCCGCTGGAGCGACTAAAGGCACATCATACGCGTCCAGGACTGCACGTGCAGTGTTTAAAAAGTCAAAATTTCCCTTTGGAATATCCCTTCCGACATGGTTAGGCGGTTACACCCCATGGACAGCCAGACGTGTTATGGTTCGTAACATTGCGCCGTTTGTTGGACGTTCCATTCCTTTGATCGGGGAAATTATCCTTGCCGCAGATGTGTCACAAATAACATATTGCACTATACGCGACTACAATACCATTGCTCGGGGCAATGATAAGTTATGGTAG	ATG	TAG
SL1344_2720	ATGAGACACACCACCATTACCGCCCGTGACCTCGAATGTCTGGAGCATATGCGCAACGTCGGCCAGCTCGTCAATGAGCTGATGCAGGTGCAGGACTGCGCCACCGTTCGTCGCGACCCGGTGCAGCAGTCACAGCTCACCTCGGTGATTTACCTCATGACCGCCCAGCTTGACGGCGTGGTAGAGCGCTGCAATCAGCGCTGGCTGACCGGGGAGGGCAACGTATGA	ATG	TGA
SL1344_3655	ATGCACAAAAATGGAAAATTTATCCCCCTGCTTGCGTTGGGATTCACATTCTTTTTATCTGGTTGTGATTACTTCGCAGATAAACACCTTGTTGAAGAAATGAAAGAACAACAAAAAGAACAAGAAACAAAGATAAACCTGTTAGAAAAACAACAAAAAGAACAAGAAGCAAAGATAAATCTGTTAGAAAAACAACAAGCTACGATTATCAACACAACCAAAAAGGTCACCGAAGTCGTTGGCCGCGTTGAACGCAAACAACGGCTATTCGACTATACAGAACTGGACCCATCACAAACGCACTATTTTATTATTAACAACGGCAATATCGGATTAGCCGGGCGTATTCTATCTATTGAGCCAATAGATAATGGAAGTGTTATTCATCTTGATTTAGTT…	ATG	TAA
folB	GTGATGGATATTGTATTTATAGAGCAACTTTCGGTAATCACCACTATCGGTGTTTACGACTGGGAACAGACTATCGAGCAAAAACTGGTGTTCGATATCGAAATGGCATGGGATAACCGCAAGTCGGCGAAAAGCGATGATGTCGCAGATTGTCTAAGTTACGCGGATATCGCCGACACGGTGATAAATCATGTTGAAGGCGGGCGTTTTGCTCTGGTCGAGCGTGTGGCGGAAGAGGTGGCGGATCTGCTGCTTAGCCGATTCAATTCTCCGTGGGTTCGCATCAAACTGAGTAAGCCTGGCGCCGTCGCGCGCGCGGCGAACGTAGGGGTAATTATTGAGCGTGGCAATAATCTGAAATAA	GTG	TAA
SL1344_1878	ATGAGTACGCCTGATTTTTCCACCGCTGAGAATAATCAAGAACTGGCTACTGAAGTCAACTGCCTGAAAGCCATGTTAACGCTGATGCTGCAGGCGATGGGCCAGGCCGATGCAGGGCGCGTGATTCTTAAAATGGAAAAACAGATCGCGCAGATGGATGATGAAGCACAAGCGGCGGTATTTTCCAGTACGGTTAAGCAAATTAAACAGGCTTACCGCCAGTAG	ATG	TAG
rmf	ATGAAGAGACAAAAACGAGATCGCCTGGAACGGGCACATCAACGTGGATATCAGGCCGGCATCGCCGGACGATCAAAAGAAATGTGTCCCTATCAGACGCTGAATCAACGGTCATACTGGTTGGGAGGTTGGCGACAAGCCATGGAGGACAGGGCGGTAATGGCCTGA	ATG	TGA
aarF	ATGACGCCAGGTGAAGTACGGCGCCTATATTTCATCATCCGCACGTTTTTAAGCTACGGCCTTGATGAACTCATCCCCCGAATGCGTCTTACACTGCCACTCCGATTATGGCGCTATTCGCTGTTCTGGATGCCAAACCGGCATAAAGATAAATTGCTGGGTGAACGATTAAGACTGGCGTTGCAAGAGCTGGGACCGGTCTGGATCAAATTTGGTCAGATGCTCTCCACGCGCCGTGACCTGTTCCCGCCGCAAATCGCCGATCAGCTCGCTTTGCTCCAGGATAAAGTCGCGCCATTCGATGGTCGGCTGGCGAAAGCCCAGATTGAAGAGGCGATGGGGGGGCTACCTGTCGAAGCCTGGTTTGACGACTTTGATATCCAGCCTTTAGCGTCGGCG…	ATG	TGA
SL1344_2206	GTGACAACATTCCGCGATGTATCAACGCAGGAAGGGGAGACCTACCTTTCAGCTGTTCAATCCAAACGGAGGACTATAGCCATGGGCTTCCCTTCACCTGCCAGTGATTACGTTGAAACAAGGATCTCCCTCGATCAGCAGCTAATCAGCCAGCCCGCAGCGACTTATTTCATGCGGGCATCGCGTTCACATTTCAGGGAAGGGATAATCCAGGGGGCGCTACTTGTTGTGGACGCGTCGCTTTCAGCCTGTGATGGCTCGCTGCTGATATGCGCGATAGATGGGGAATTCAGGATCAAGCGATACCGAACTCACCCTCAGCCCCACCTGATAAATCTGGAGAACGGGAGAAAGGAAGCGCTGCCAGAAGATGGTGATGGCTACAATTCTTCACACGCA…	GTG	TGA
miaB	ATGACTAAAAAACTCCATATTAAAACCTGGGGCTGTCAGATGAACGAGTACGATTCATCGAAGATGGCCGATCTGCTGGACGCCACCCACGGCTATCAACTGACCGACGTGGCGGAAGAGGCGGATGTGCTGCTGTTGAATACCTGCTCAATCCGCGAGAAGGCTCAGGAAAAAGTCTTCCATCAATTAGGTCGCTGGAGACTGTTAAAAGAGAAAAATCCCGATCTGATTATCGGCGTCGGCGGCTGCGTGGCTTCCCAGGAAGGCGAGCACATTCGTCAACGCGCCCATTACGTCGACATTATTTTTGGCCCGCAAACCTTACACCGCCTACCGGAGATGATTAACTCCGTGCGTGGCGACCGCAGCCCGGTGGTCGATATCAGCTTCCCGGAAATC…	ATG	TAA
ygcZ	ATGAGTTCATTAAGTCACGCGGCGAGCAGTGCGGAGAAACGCACGAACGCCCGCTACTGGATAGTGGTGATGCTGTTTATCGTCACATCCTTCAACTACGGCGACCGCGCCACATTGTCCATTGCCGGCTCAGAAATGGCCAAAGATATCGGCCTTGATCCGGTAGGCATGGGCTATGTTTTTTCTGCTTTTTCATGGGCCTATGTTATCGGGCAGATCCCGGGCGGCTGGCTGCTGGACCGCTTTGGTTCCAAACGCGTCTATTTCTGGTCTATTTTCATTTGGTCAGTCTTCACCCTGTTGCAGGGTTTTGTCGATATCTTTAGTGGTTTCGGCATTATTGTCGCCCTCTTTACGCTTCGTTTCCTGGTTGGTCTGGCGGAATCGCCTTCTTTCCCG…	ATG	TGA
hflK	ATGGCGTGGAATCAGCCCGGTAATAACGGACAGGACCGCGACCCGTGGGGAAGCAGCAAACCTGGCAGCAACTCTGGGGGAAATGGAAACAAAGGTGGCCGCGATCAGGGACCTCCCGATCTGGATGATATCTTCCGTAAGCTGAGTAAAAAACTCGGTGGTTTTGGGGGCGGTAAAGGCACCGGTTCCGGCGGCGGTAGCTCATCGCAAGGCCCACGTCCGCAACTGGGAGGCCGTATTGTCGCCATCGCCGCGGCGGCAGTAGTCATTATCTGGGCGGCCAGCGGTTTTTATACCATTAAAGAAGCCGAGCGCGGCGTTGTGACGCGTTTTGGTAAATTCAGCCATCTGGTAGAGCCAGGTCTGAACTGGAAGCCGACATTTATTGACGACGTCACG…	ATG	TAA
SL1344_4139	ATGAACACTATGCTCAAGATATTACCGAAAACGGCGATGATACTACTGGCTTTTTTGGCCATTTTTCTTATTGAATGGTATACCCCTATTCACTCTGATGATTACCGCTATTACCTTTTAGGAATTTCGCCGGAATCACATTTTCATCATTATATGACATGGAGTGGCAGGATTATAGCTGATTACACCAGCGCACTCATCCTGTATACACGTTCTCAACTCGTGTATTCCATCAGCGCAGCCGTTTCGACACTGGTATTTTGTTATTTCATTGTGAAGACACCCTCAGGTACATTACGCTGGAATAAATCCGACTACTTATTATTCCCACTAATATTCTTCACTTACTGGATTTCGAACCCGAATTTGGGTCAAACCACTTTCTGGATCGTTGGTGCT…	ATG	TAA
fabI	ATGGGTTTTCTTTCCGGTAAGCGCATTCTGGTCACTGGCGTGGCCAGTAAACTGTCCATCGCCTACGGTATCGCACAGGCGATGCACCGCGAAGGAGCTGAACTGGCGTTCACCTACCAGAACGACAAACTGAAAGGCCGCGTAGAAGAATTTGCTGCCCAGCTGGGTTCCAGCATCGTTTTACCGTGTGATGTCGCTGAAGATGCCAGCATTGACGCTATGTTTGCGGAGCTGGGTAACGTTTGGCCGAAATTTGACGGTTTTGTACACTCGATCGGTTTCGCGCCTGGCGATCAGCTGGACGGCGATTATGTTAATGCGGTTACCCGCGAAGGCTTTAAAGTCGCTCACGATATTAGCTCTTACAGCTTTGTTGCCATGGCGAAAGCCTGCCGCACC…	ATG	TAA
SL1344_0081	ATGCAAAAACGTCTTATGACCGCACTGTTTACCGCAGCAACACTATTCACCGTCGCAGGATGCTCTTCTAACCAGGCGGTTGAAACCACGGATGGCAAAACTATTGTCACCGACGGGAAACCCGAGGTCGATAACGATACCGGTATGGTGTCTTACAAAAACGCCGCCACCGGGAAAACCGAACAGATTAACCGCGATCAGCTGAAAAATATGAGCGAGCTGGATAATTAA	ATG	TAA
xseB	ATGCCGAAGAAAAATGAGGCGCCCGCCAGCTTTGAAACTGCGCTGAGCGAGCTGGAACATATTGTTACCCGCCTGGAAAGCGGCGATTTGCCGCTGGAAGACGCGCTGAATGAATTCGAGCGCGGCGTACAACTGGCGCGTCAGGGGCAGGCAAAACTGCAGCAGGCGGAACAGCGCGTGCAAATTTTGCTGTCTGATAATGAAGAGGCTTCACCTGAGCCTTTTATCGCGGATAATGAGTAA	ATG	TAA
yaeA	ATGTCGTCACGCAACTCTGTACATGATTTTATAATGCTGCTCCCGGCGCTGCTGTTGGTTGGGTGGTTAGTTTTGGTGATAATTCTCATGTTTAGGGATGATAAATGTGACAAAACTTACCGTGAAGGTTCGTTTCCCGAATTTATTTGTCTCCATTCTGATCGCTCGTCACTTCGAGAAACCGATTCTGAGAGACTCATTGTCAAATATACAGAAATAAAATCACAAAAATAG	ATG	TAG
rnfB	ATGAATACTATCTGGATTGCCGTTGGCGCCCTGACCCTTCTGGGTCTGGTGTTCGGCGCCATTCTGGGTTATGCCTCCCGCCGATTCGCGGTTGAAGATGATCCGGTTGTTGAAAAAATCGATGCGATTTTGCCGCAGAGCCAGTGTGGTCAGTGCGGCTATCCCGGCTGCCGCCCCTACGCCGAAGCCGTGGGTCTCCAGGGCGAGAAAATCAATCGTTGCGCGCCCGGCGGCGAAGCCGTCATGCTGAAAATTGCAGAGTTGCTAAACGTAGAGCCGCAACCATGCGATGGTGAAGAACAGCAGGCTGCGCCAGTACGTATGCTGGCAGTTATTGATGAAAATAACTGCATTGGCTGCACAAAATGCATTCAGGCCTGCCCGGTTGACGCCATTGTT…	ATG	TAA
fhuD	ATGCGTGATTTATATCCTCTTACTCGCCGCCGTTTATTAACGGCGATGGCGCTCTCGCCGCTGCTGTGGCAAATGAATACGGCGCAGGCTGCCGCTATCGATCCCCGCCGGATTGTGGCGCTGGAGTGGCTGCCGGTTGAGCTGCTGCTGGCGCTCGGTATTACGCCGTATGGCGTGGCGGACGTGCCAAATTATAAGCTGTGGGTTAGCGAACCGCCGTTGCCGGATTCGGTGATTGATGTGGGTCTTCGCACTGAACCCAATCTCGAACTGCTGACGGAGATGAAGCCGTCGTTTATGGTCTGGTCGGCAGGCTACGGACCCTCGCCGGAGAAACTGGCGCGGATCGCGCCGGGGCGCGGGTTCGATTTTAGCGACGGCAAAAAGCCGCTGGCGGTG…	ATG	TGA
SL1344_3341	TTGCCTCATCTTGACGCCTGGCGTCCGGCTATCCTGAATAAAATTGAGTCTGTGACCGGCGTGCCGGTGGCCGCCAGCCAACTCTCCGCAAGCTGGCAAAATTTTGGCCCTACGCTGGAAGCGCATAATATTCATGCCGCCCTGAAAGATGGCGGCGAACTGTCGATAAAACGCGTTACGCTGGCGCTGGACGTCTGGCAAAGCCTGTTGCATATGCGCTGGCAGTTTCGCGACCTGACCTTCTGGCAACTCAATTTCCGCACCAACACGCCTCTTCAAAGCAGCGACGGCGAAGGCATCGAAACCAGCCGTTTAAGCGATCTTTTCCTGCGGCAGTTCGATCATTTCGATCTGCGCGATAGCCAAATCAGTTTTCTGACGCTTTCCGGACAACGCGCG…	TTG	TGA
SL1344_2554	ATGGCAACGACGCACGCACTCCATCTGGCGACACCGGGCATGGCGCGCATCTGCCTTTACGGGGATCTGCAACGATTTTGCCGCCGCGTCAGCCTGCAGGTAGCCAGTGGTGCTGAAGCTGTCCGGGCACTGGCGGTACAGTTGCCCGGTCTCCGGCAGAAACTGAACGACGGCTGGTATCAGGTACGCATAGCCGGAGACGATGTTACGGCTGATACCCTGACAACCAGCCTGCATGACCCGCTGCCGCCTGGCGCGGTGATTCATATTGTGCCGCGTCTGGGCGGGGCCAAATCTGGCGGGGTGTTTCAGGCGGTGCTTGGTGCGGCGCTGATTGCCGTTGCCTGGTGGAACCCGGCAGGCTGGCTGGGAGCGGCGGCGGTATCCGGTATGTATATG…	ATG	TGA
SL1344_1171	GTGATTGTGGCAAAGAATTATTATGACATCACCCTCGCGCTGTCTGGCATTTGCCAGTCGGCACGCCTGGTGCAACAACTGGCGCACCAGGGACACTGTGATGCCGACGCGTTGCACGTTTCACTCAACAGTGTCATTGATATGAATCCCAGTTCTACTCTGGGCGTGTTCGGCGGCAGCGAAGCCAACCTGCGTCTTGGTCTGGAAACACTGCTCGGCGTGCTGAATGCCAGCAGCCGACAAGGACTTAACGCCGAACTGACGCGTTATACGCTTAGCCTGATGGTGCTGGAGCGCAAGCTGTCATCCGCCAAAGGCGCATTGAATACGTTAGGCGATCGCATTAACGGCCTGCAGCGCCAGCTTGATCATTTTGATTTACAGTCAGACACGTTAATG…	GTG	TGA
tal	ATGAACCAGCTAGACGGCATCAAACAATTCACTACCGTCGTCGCCGATAGCGGCGACATCGAGTCCATCCGCCACTACCAGCCGCAGGATGCCACGACAAATCCCTCTTTACTGTTAAAAGCCGCCGGGCTTGAGCAGTATGGTCATTTGATTGAGGATGCGATTGCCTGGGGGAAAAAACACGGCGGTACGCAGGAACAGCAGGTTGCGGCAGCCAGCGATAAACTGGCGGTTAATTTTGGCGCGGAAATACTGAAAAGTATTCCCGGTCGCGTCTCCACTGAAGTCGACGCGCGGTTATCGTTCGATAAAGAAAAAAGTATCGAGAAAGCGCGCCATCTGGTGGATCTCTACCAGCAGCAGGGTGTTGATAAATCACGCATTCTGATCAAGCTCGCC…	ATG	TAA
SL1344_P1_0072	ATGTTAAGAGCCACGAAAGTATGCATATATCCGACACCGGAACAGGCGGAGCACCTTAACGCCCAGTTCGGTGCAGTCCGTTTTGTGTACAGCAAATCTCTGCATATCAAGAAACACGCTTATCAACGACACGGCGTAAGTTTAACCCCGCGTAAAGACATTAAACCGCTTCTGGCTGTAGCGAAAAAATTCCGTAAATTCCGTAAATACGCATGGCTAAAGGAATATGACTCTATTGCGTTGCAACAGGCGGTGATCAATCTCGATGTTGCCTTTTCCAACTGCTTCAATCCGAAGCTAAAAGCCCGCTTCCCTATGTTCAAGCGCAAACACGGCAAGCTGTTGGGGTAA	ATG	TAA
SL1344_3654	ATGAAAGAAGTTGAAAAAAACGAAATTAAACGCCTGAGCGATCGTCTTGACGCTATTCGCCACCAGCAGGCAGGTCTCTCTCTGGTTGAATCCGCCGATAAATACGCGGAGCTGGAAAAAGAAAAAGAGACGCTAGAAGCAGAAATTATCCGTCTGCGCGAAGTACACAGCCAGAAACTGAGTAAAGAAGCGCAGAAGCTGATGAACCTGCCGTTTCGCCGCGCGATCACTAAAAAAGAGCAGGCCGACATGGGCAAGTTGAAGAAAAGCGTGCGTGGCCTGATTGTTGTCCACCCGATGACGGCGCTGGGCCGGGAAATGGGGCTCAAAGAGATGACAGGTTTCGCGAAGAGCGAGTTCTAA	ATG	TAA
bacA	TTGATGAGCGATATGCACTCGCTGCTGATAGCGGCAATTTTGGGTGTGGTCGAAGGATTGACGGAGTTTTTGCCGGTATCCAGCACGGGCCATATGATTATTGTGGGTCATCTGCTGGGGTTTGAAGGCGATACGGCCAAGACATTCGAAGTGGTGATTCAACTTGGATCTATTCTGGCGGTCGTGGTGATGTTCTGGCGGCGGTTGTTTGGTCTCATCGGTATTCACTTTGGCCGCCCGCTACAGCGTGAAGGTGAAAGTAAAGGTCGATTAACGTTGATTCACATCCTGCTGGGCATGATTCCGGCGGTGGTGCTGGGGTTAGTCTTTCATGACACGATCAAGTCGCTATTTAACCCAATTAACGTGATGTACGCGCTGGTGGTAGGCGGTCTGTTG…	TTG	TGA
sirA	TTGATCAACGTTCTTCTTGTTGATGACCACGAACTGGTGCGCGCAGGGATACGACGCATTCTTGAAGATATAAAGGGCATTAAAGTTGTCGGTGAAGCGTGCTGCGGAGAGGATGCGGTAAAATGGTGCCGTACTAACGCCGTTGACGTCGTGCTGATGGATATGAACATGCCCGGTATTGGCGGCCTTGAGGCGACGCGTAAAATTGCCCGCTCGACAGCGGATATCAAAGTGATCATGCTGACCGTCCATACGGAGAACCCGTTGCCCGCCAAAGTGATGCAGGCTGGCGCAGCTGGCTATCTCAGCAAAGGCGCTGCGCCTCAGGAGGTGGTGAGCGCTATTCGTTCGGTGTATTCCGGACAACGTTATATCGCCTCCGATATCGCTCAGCAGATG…	TTG	TGA
SL1344_1005	ATGAAAAAATGGCTAGTCGTGATAATGGCGTTCTGGCTGGCGTCATGTAGCTCCGGCGGAGAGAATAAAAGCTATTATCAGCTCCCGATAGCGCAAAGCGGTGTGCAAAGCACCGCAAGCCAGGGCAACCGTCTCTTATGGGTAGAGCAGGTTTCCGTACCTGACTATCTGGCAGGTAACGGCGTGGTGTATCAAACCAGTGATGTTCAGTATGTGATTGCCAATAACAATCTGTGGGCCAGCCCGCTGGACCAGCAATTACGTAACACGCTGGTGGCGAATCTTAGCGCCCGGCTTCCTGGCTGGGTCGTCGCTTCCCAGCCGTTGGGAACCACCCAGGATACGTTAAACGTTACCGTAACCGGATTCCATGGACGCTACGATGGTAAGGTTATCGTC…	ATG	TGA
yejM	ATGGTAACTCATCGTCAGCGCTACCGTGAAAAAGTCTCCCAGATGGTTAGCTGGGGGCACTGGTTCGCTCTGTTCAATATACTGTTGGCTACGTTGCTCGGCAGCCGTTACCTGTTTGTCGCCGACTGGCCGACAACGCTTGCGGGTCGCATATACTCCTACCTGAGCATTGTCGGGCACTTTAGCTTTCTGGTGTTCGCCACCTATTTGCTTATTCTTTTTCCGCTCACGTTTATCGTGATGTCCCAGCGGCTGATGCGGTTTTTATCAGCCATTCTGGCGACCGCGGGTATGACGTTGTTGCTTATCGACAGCGAAGTCTTTACCCGTTTCCACCTGCATCTTAATCCCATTGTCTGGGAGCTGGTCATCAACCCTGACCAGAACGAAATGGCGCGC…	ATG	TGA
ybeZ	GTGTTCAGCGTCCGGCGATACAGACACAAGAGGAACAGTTTGAATATAGACACTCGCGAAATTACCCTTGAGCCCGCAGACAACGCCCGTCTGTTGAGCCTTTGCGGGCCGTTTGATGACAATATTAAACAGCTCGAACGTCGTCTCGGTATTGAAATCAACCGCCGTGACAATCACTTTAAACTGACCGGTCGTCCGATTTGCGTGACCGCGGCGACAGATATTTTGCGAAGTCTGTATGTCGATACCGCACCGATGCGCGGCCAGACTCAGGATATCGAACCGGAACAAATTCATCTGGCGATCAAAGAAGCGCGGGTGCTGGAACAGAGCGCGGAAAGCGTGCCTGACTATGGCAAAGCTATTAATATCAAAACCAAGCGCGGCGTGATTAAACCG…	GTG	TGA
SL1344_3925	ATGCCTTTTAAACCCTTAGTGACCGCAGGAATTGAAGGTCTCCTCAATACGTTTCTGTATCGTTCGCCAGCGCTGAAATCAGCCAGAACGCGCTTACAGGGAAAAGTACTGTGTGTGAAACTAAAGGGATTTTCGATGCCATTAGTCCTGGTATTCAGTGAACGCCAGGTTGATGTGCTGGGGGCATGGGAAGGCGAAGCGGACTGTACGGTAATCACTCAAGCTAGCGTTTTGCCAAAACTACGCGATCGTCAGCAGTTGGCCACGCTTATTCGCAGCGGCGAACTGGAAGTGCAGGGCGATATTCAGGTCGTGCAAAATTTTGTGGCGCTCGCCGATCTCGCCGAATTCGATCCTGCGGAGCTGTTGGCGCCATACACGGGTGATATTGCGGCGGAA…	ATG	TGA
SL1344_2942	ATGACAACGCAATCCAGTCCCGTTATTACGGACATGAAGGTCATTCCGGTTGCCGGACATGACAGTATGCTACTCAACATCGGCGGCGCGCATAACGCGTACTTCACCCGTAACATCGTCATCCTCACCGATAACGCCGGGCATACTGGCGTCGGCGAGGCGCCGGGCGGAGAAGTGATTTATCAGACGCTGGTCGATGCTATTCCGATGGTATTAGGCCAGGAAGTCGCCCGCCTGAACAAAGTGGTGCAGCAGGTGCATAAAGGCAACCAGGCTGCTGATTTTGACACCTTTGGTAAAGGCGCATGGACGTTTGAACTGCGGGTTAACGCGGTGGCAGCTTTGGAAGCGGCGCTGCTTGATCTACTGGGGCAGGCGCTTAATGTGCCGGTCTGTGAA…	ATG	TAA
hflX	TTGTTTGACCGTTATGATGCCGGTGAGCAGGCGGTACTGGTACACATCTATTTTTCGCAAGACAAAGATATGGAAGACCTCCAGGAGTTTGAATCTCTGGTCTCTTCCGCCGGTGTCGAAGCAATGCAGGTGATTACCGGTAGCCGTAAAGCACCGCACCCGAAGTACTTTGTAGGTGAAGGTAAGGCAGTTGAAATTGCGGAAGCCGTGAAAGCGACTGGCGCAGCGGTCGTATTGTTTGATCATGCATTGAGTCCAGCCCAGGAGCGAAACCTGGAGCGTTTGTGCGAGTGCCGGGTTATCGATCGCACCGGTCTTATCTTAGATATTTTTGCCCAACGTGCGCGTACCCATGAAGGTAAGTTGCAGGTTGAGCTGGCGCAGCTACGCCATCTGGCT…	TTG	TAG
stjC	ATGGTACCGGAAACTACGCTACTGGTGATTGAAGAATCCACACACAGCGGCGTAATGAATGTTAAAAACACCGACAGCAATCCGGCTTTGTTATATACCACCGTCGTTGATTTACCTGACGACAATGGTGTGAAACTGGATGTCACTCAACCAGTTGTTCGCGTTGAAGCAGGCCAGCAGCAGCAACTACGCTTTATTATGGAAAGTACGGAACCGCTCACCGTCGAGCACTATAAGCGCGTCACGTTTGAAGGTATTCCTCCGAAATCTACCGATAAAGGAATGAAAATAGGTTTTAATCTACGCCAGGATTTGCCGGTATTAATTCGTCCTAAAAATCTACCGGTCGTTACTGATGCCTGGAAATTATTAACCTGGTCCAGAAACGGACAAACAATC…	ATG	TAA
SL1344_1630	ATGTCCATAACATCGCTAATAGGTGAGGTAAACCATTTGGATGAATATTCAGGCTTCCTACAGAACCTTTATTTGTCTGGTGGAAAGCGCATCGCTATCGTACTTGCTATCCGTCCCGGTGTCTCTGGTTGGATGAGGCGAACCTTACACCAGCTGGTATACTGCACCGTAGGGCCTGTCCCATTAGACTCTTTGATTTGCCAGTTTGGCCCTGGGGAGTGCTCAAAATCCTCAGGAACTTCGTTACCGTGTGGTTTTAGAACGTCACCTGCCGGAGATAGCGGCGGAAAAATAGCGTGA	ATG	TGA
yaaU	ATGCAGCAGCCCAGGAACTTTGATGACCTTAAATTCTCCTCCATTCATCGCAGAATTATGCTGTGGGGAAGCGGCGGCCCGTTCCTTGATGGCTACGTGCTGGTGATCATTGGCGTGGCGCTGGAACAACTGACGCCGCTATTGCACCTTGATGCTGAATGGATTGGCGCGCTCGGCGCGGCTACGCTTGCCGGACTGTTTATCGGCACCTCGTTGTTTGGCTATATTTGCGATAAAGTCGGGCGGCGTAAAATGTTCCTGCTTGATATTATCGCTATCGGCGTTATCTCCGTGGCGACCATGTTTGTTTCCACGCCGCTTGAATTACTGGTGATGCGCGTTTTAATTGGCATTGTTATCGGCGCGGATTACCCTATCGCTACTTCCATGATTACGGAG…	ATG	TAA
ispA	ATGGACTTTACGCAGCAGCTACAGGCTTGCGTAACGCAAGCGAATCAGGCGCTGAGCCGTTTTATCGCGCCACTGCCCTTTCAGAACACTCCCGTGGTCGAAGCCATGCAGTATGGCGCATTATTAGGCGGTAAACGCCTGCGGCCATTTCTGGTTTACGCCACCGGTCAAATGTTTGGCGTCAGTACGGCAACGCTGGATGCGCCAGCTGCGGCGGTCGAATGCATTCATGCCTATTCGCTGATCCATGACGACCTGCCAGCAATGGACGATGACGATTTGCGTCGCGGCCTGCCGACTTGCCATATTAAATTTGGCGAAGCCAACGCAATCCTGGCGGGAGACGCGTTGCAGACGCTGGCGTTTGCCATTATCAGCGACGCGCCGATGCCGGAAGTC…	ATG	TAA
yadA	ATGCGGCTTTTTTTAGGCGGCAGGTGCTACACGGCTGAAAAACTTGAAAAGGATTATCTGGCTGAAGTGGCTAATTACAGTAACGACCGCTGGGAAGCACCGCAACGTGCCTCACGCCTGGCTGCCAGCGTAAAGCGTTACAAGACATCAGAAATGCTGCGCTTTATTTTTGCTACCATTGCCTACGATCCCGATCCAGATTTAACCCCGCTGACTGTGAGACGTTTATGCAAGGCATTGTTCGGCAGAACCGGAAGCCAGTGGCTGGTTGTTGAAGTTTTTGGGGAGAAGGGGCGTCAGCACCGCAGCGCGGACAGCAATCCGGAGATGGTGGAAAAAATGGCTGCCAGATATCGTCATGCCGCCGAACTACACTGGTCCGCAACGCTGGCAGAAATT…	ATG	TAA
rnfC	ATGCTTAAACTATTTTCCGCTTTCAGAAAAGATAAAATCTGGGATTTCGACGGTGGTATTCATCCGCCCGAAATGAAGACCCAGTCAAACGGCACGCCGCTGCGCCAGGTGCCTTTAGCGCCGCGCTTTGTTATCCCTTTAAAACAGCACATTGGCGCTGAGGGCGAGCTGTGCGTTAGCGTCGGCGATCGCGTGCTACGCGGCCAGGCGCTTACCCGTGGACGTGGGAGAATGCTGCCGGTACACGCGCCCACCTCCGGGACGGTTATCGCTATTGCCCCCCACTCGACGGCGCATCCTTCGGCGCTGGCGGAGTTAAGCGTAATCATTGATGCCGACGGCGAGGACCGCTGGATTGAACGCGAGGGCTGGTCTGATTACCGCGCCCACAGCCGTGAA…	ATG	TAA
SL1344_2553	ATGGGAAAGGGCGGCGGAAAAGGGCATACGCCCCGCGAGGCACCGGATAACCTTAAATCCACGCAGCTGCTGAGCGTCATCGATGCCATCAGCGAGGGACCGATAGAAGGCCCGGTGAACGGTCTGCAAAGTGTTCTGGTAAACCAGACGCCGGTGGTGGACCGCGACGGTAACACGAATATCCACGGCGTGAAGGTGGTATACCGCGTCGGTGAGCAGGAACAGACCCCGCTGGAGGGATTTGAATCGTCCGGCGCCGAGACGGTGCTTGGTGTACAGGTCAAATACGACAATCCGGTGACCAGAACCATCACGGCTGCAAATATTGACCGCCTGCGTTTTACGTTCGGCGTGCAGTCACTGGTGGAGGCCAACAGCAAGGGCGACCGCAATCCGACA…	ATG	TGA
symE	ATGACTACCGTCCATTCTATTGCAGATCCGTGCGATCCAGAAGTCTCCCCAACAAATAACCGTCACCTTACCGTGAGTTATGCGAGTCGTTATCCGGATTATACCCGCATTCCCGCCCTCACCATGAAGGGCCAGTGGCTGGAAGCCGCCGGTTTCGCCACCGGTACCGAGGTGGATGTGAGGGTGATGAACGGCTGTATTGTGCTGACGGCACAGCAGCCGCAACCAGAAGAAAGCGAGTTGATGCAGTCGCTGCGCCAGGTGAGCAAGCTATCGGCGCGTAAGCAAAAGCAGGTGCAGGCGTTTATCGACGTGATGGCAGGTTCTAAGTAA	ATG	TAA
maeB	ATGGATGAGCAGTTAAAACAAAGCGCCCTTGATTTCCACGAATTTCCGGTACCCGGTAAAATTCAGGTTTCTCCGACTAAGCCCCTTGCCACCCAACGCGATCTGGCGTTGGCTTACTCGCCAGGCGTGGCGGCGCCCTGCCTGGAAATCGAAAAAGATCCGCTGGCAGCCTACAAATACACCGCGCGCGGCAACCTTGTCGCGGTCATTTCCAACGGTACAGCGGTACTGGGGTTAGGCAACATTGGCGCGCTGGCCGGCAAGCCGGTCATGGAAGGCAAAGGCGTTCTGTTTAAAAAATTCGCCGGCATCGATGTGTTTGACATTGAAGTCGATGAGCTTGATCCGGACAAATTTATCAATGTGGTCGCAGCGCTGGAGCCGACCTTTGGCGGCATT…	ATG	TAA
SL1344_1987	ATGGTAGACAATATTGAACAGCAAGTTTACGAGCTTGTACGGCCTTATGCTGGCACATATCTTTTCAACATTAAGCAAGTGGAATTAACACCAGAGATTGACCTTGATACTGATCTGAGCATTGATGAACTTGAAGCCGAAGATCTCATGAATAAATTCTTCGAGGAACTCAATGTCGAGCGAGGTAACTTCAGAATAGAAACCTATTTTCCTAATCACCCTTTTTCATGGCATCCGTTCAAGAAAACGGAACCTGTACCCGTCCCAGATTTCACTATCAGCATGCTGATCGAGTCAGCAAAAGCCGGGAAATGGTTATATGACTAA	ATG	TAA
SL1344_2719	ATGATGATGACCATTCAGCAAACAGCCCCTTTTTCTGGCTTGCTTCTTTTTATCGTTTCCAGGTATAGTTTTCCCGCTGTCGCAAAATCGGCAGCCGGGCGTGGAAACCCGAGTAATCTAACGGCGACACCTGACGCGCCATGCGTCTTTTTTTGTGTCTATGCCCTCGTGCACCTGTTACTTGCGCAATGGTTTCATGACCTTTGCAGCTATCGAGTAATGGTGGCTCAGGCGGGGCCGACTTCGGTCGGGCCGGTATCCGTTAGAGCCGGTATTTCCACCCCCGTCTGGGCTACCACCACTGAGCGTGGAAACTCCGGTGGTAGCATAACCTGCTATCTAACGGAGGTTGCCCTTATGGCTACGATCCTCACCCCGTCATACCCGCAGTTTGTCTTT…	ATG	TGA
SL1344_3653	ATGGCAAAAATAGGTGAGAACGTACCACTTCTTATTGATAAAGCCGTCGATTTTATGGCGTCCAGCCAGGCGTTCCGTGAATACCTGAATAAAACGCCGCCGCGTGATTATGTTCCTTCCGAGGTGCCGTCGGAGAGCGCGCCCATTTATTTGCAGCGTCTGGAATATTACCGGCGGCTGTACCGACCAAAAGAAGAAGAAAGAGGTTAA	ATG	TAA
cca	GTGAAGATTTATCTGGTCGGTGGTGCGGTTCGGGATGCGTTGTTAGGGCTACCGGTTAAAGATAAAGATTGGGTCGTTGTCGGCGCCACGCCGCAGGAGATGCTTGATGCGGGCTACCAGCAGGTAGGCCGTGATTTTCCTGTGTTTCTCCATCCGCAAACTCACGAAGAATACGCGCTGGCGCGTACTGAGCGTAAATCCGGTTCCGGCTACACGGGCTTCACCTGTTATGCCGCGCCGGACGTTACCCTGGAAGCCGATCTCCAGCGTCGCGATCTGACCATTAATGCTCTGGCGCGCGACGATGCCGGCCAGATTATCGACCCTTACCACGGGCGCCGGGATCTGGAGGCACGTCTACTGCGCCATGTCTCTCCCGCGTTTGGCGAAGATCCCTTG…	GTG	TAA
uvrC	GTGAGTGAAATATTTGACGCAAAGGCGTTTTTGAAAACCGTTACCAGCCAACCCGGTGTCTATCGTATGTATGACGCCGGCGGTACGGTTATTTATGTCGGTAAAGCAAAAGACCTGAAAAAGCGTCTTTCCAGCTACTTTCGCAGCAACCTGGCTTCGCGTAAAACCGAAGCGCTAGTTGCGCAAATTCAACACATTGATGTCACGGTAACGCATACCGAAACGGAAGCGCTGCTGCTTGAGCATAATTACATCAAGTTGTATCAACCGCGTTACAACGTGTTGTTGCGTGATGATAAATCCTATCCTTTTATTTTTCTGAGCGGCGATACCCATCCGCGTCTGGCGATGCACCGTGGCGCCAAACATGCGAAAGGCGAGTACTTCGGCCCATTTCCT…	GTG	TGA
pqiB	ATGGAACCTAAAAAAGGGGAAGCCAAAGTACAAAAGGTGAAAAATTGGTCGCCTGTCTGGATATTCCCGATTGTTACTGCGCTTATCGGAGCCTGGATTCTGTTTTATCACTACAGCCACCAGGGACCGGAAGTTACCTTAATCACCACCAATGCGGAAGGCATTGAAGGCGGAAAAACGACGATCAAAAGTCGCAGCGTGGATGTCGGCGTGGTTGAAAGCGCGACGCTGACTGACGATCTGACCCACGTACAAATCAAAGCGCGGCTCCATTCCGGTATGGAAAAGTTGCTGCATAAAGACTCGGTATTTTGGGTGGTAAAACCGCAGGTGGGGCGTGAAGGCATCAGCGGGCTTGGGACGCTGCTATCAGGCGCGTATATTGAACTACAACCAGGA…	ATG	TGA
ubiE	ATGGTGGAAGATTCACAAGAAACGACGCACTTTGGCTTTCAGACCGTCGCTAAAGAGCAGAAAGCTGACATGGTGGCCCACGTTTTTCATTCTGTGGCGTCAAAGTACGATGTGATGAATGACTTAATGTCATTTGGCATTCATCGTTTGTGGAAGCGCTTCACCATTGATTGCAGTGGCGTGCGTCGTGGACAAACCGTTCTCGATTTAGCGGGTGGTACGGGCGATCTTACCGCGAAATTTTCACGTATGGTCGGGGAAACTGGCAAAGTTATCCTGGCGGATATTAATGATTCCATGCTCAAAATGGGGCGTGAGAAGCTGCGTAATATCGGCGTGATCGGCAACGTAGAGTATGTGCAGGCGAATGCCGAAGCTCTGCCTTTCCCTGATAATACG…	ATG	TAG
SL1344_2204	ATGCCACAACTCTCCCGCTATAGTGATGAACATGTTGAACAACTGCTGAGCGAACTGCTCAGTGTACTGGAAAAACATAAGGCGCCGACCGATCTTTCCCTGATGGTGCTGGGAAATATGGTCACCAACCTTATCAACACCAGCGTTGCGCCGGCTCAACGCCAGGCGATTGCGAACTCTTTTGCCCGCGCCTTGCAGTCTTCGATTAGCGAAGACAACGCGCACTAA	ATG	TAA
SL1344_0657	ATGAGCCAGGTGATCCTCGATTTACAGTTGGCCTGTGAAAACCACGCGGGCCTGCCGGATGAAGCTCAGTTTCAACGCTGGCTGGACGGCGTTATTCCGCAGTTTCAGGAAGAGGCGGAAGTCACAATCCGTCTGGTGGATGAGGCCGAAAGCCACGACCTTAATTTGACGTACCGCGGGAAAGATAAACCCACTAATGTTCTCTCCTTCCCGTTTGAAGCGCCCGCCGGCATTGAAATGCCGCTACTGGGCGATCTGATTATTTGCCGTCAGGTCGTGGAGCAGGAAGCGCAAGAACAGAGCAAGCCGCTGGAGGCGCACTGGGCGCACATGGTCGTGCACGGTAGCCTGCATTTGCTGGGTTACGATCATATCGACGATGACGAAGCGGAAGAGATG…	ATG	TAG
ygcX	ATGAGTACTCAATTTACGACGCCTGTAGTGACTGAAATGCAGGTTATCCCGGTTGCGGGTCATGACAGTATGCTGATGAACCTGAGCGGCGCGCACGCCCCGTTCTTCACGCGCAACATCGTCATTATTAAAGATAACTCCGGCCATACCGGGGTTGGCGAGATTCCGGGCGGCGAAAAAATTCGCAAAACGCTGGAAGATGCGATCCCACTGGTGGTGGGAAAAACGCTGGGTGAATATAAAAATGTCCTGACCGCCGTTCGCAACCAGTTTGCCGATCGCGATGCGGGCGGACGCGGCTTACAAACGTTCGATCTCCGTACCACTATCCATGTGGTGACTGGCATTGAAGCGGCAATGCTTGACCTTTTGGGCCAACACCTGGGCGTCAACGTCGCT…	ATG	TAA
hfQ	ATGGCTAAGGGGCAATCTTTACAAGATCCGTTCCTGAACGCATTGCGTCGGGAACGTGTTCCAGTTTCTATTTATTTGGTGAATGGTATTAAGCTGCAAGGTCAAATCGAGTCCTTTGATCAGTTCGTGATCCTGTTGAAGAACACGGTCAGCCAGATGGTTTATAAGCACGCGATTTCTACTGTTGTCCCGTCTCGCCCGGTTTCCCATCACAGCAACAATGCCGGTGGCGGCGCCAGCAATAACTACCATCACGGTAGCAACGCGCAGGGGTCTACTGCGCAACAGGACAGCGAAGAGACTGAATAA	ATG	TAA
SL1344_4138	ATGAACACGAAAACACGACCCTCGACCCTGCACTGGCAACCTGCCTTGCAACGTCCTGAAGAATACGTCTGCGGGCTGGATGATATTCATCAGGCAATACACATCATTCTGCGCACGCCGCGCGGCAGCGATCCCCACAGGCCGCTTTTTGGCAGCAATCTGTGGCGCTACATCGATTACCCGATCGAGCGGGCCATTCCGCACGTTGTTCGCGAATCGGTGGAAGCGATTCGCATGTGGGAACCTCGCTGCCGGTTGCTGAAGGTGACGCCGACGATTGACGGCGAACACCTGACGTTACGCGTGCAATGGCGCGCCGCAGACGGCGTAATTAACTCAACGGAGGTGTTATGGCGATAG	ATG	TAG
SL1344_1629	ATGCAAACATATAAAAACCTGATTTGTAACTACTGTAATCACCTGATTTCCAAAATTTTTCATATTCAGTATTACTCTGCATCAATAAATAGAGAAAACCTTCAGCACCTAAAAAAGAAATTATTTTTGTTAAGCATTTGCTGGTTAAAGTTACATGTCCATAACATCGCTAATAGGTGA	ATG	TGA
fixX	ATGACATCTCCCGTTAATGTGGACGTCAAACTGGGCGTCAATAAGTTCAATGTGGATGAAGACAGCCCGCACATCATTCTCAAAACCGATCCTGATAAACAGGCGCTGGAGGTGCTGATTAAGGCCTGTCCGGCGGGACTGTATAAAAAGCAGGACGACGGCAGCGTTCGTTTTGATTACGCCGGGTGCCTGGAGTGCGGAACGTGCCGGATCCTCGGCCTTGATACGGCGCTGGAAAAATGGGAATACCCGCGCGGGACGTTTGGCGTAGAGTTCCGCTACGGCTAA	ATG	TAA
SL1344_3544	ATGACTCCGTTTACACAATCACAGCGCATAAAAGCGTTGTTCTGGCTATCGCTATTCCATTTACTGGTGATCATTTCCAGTAACTATCTGGTGCAGCTCCCCATCACTATTTTTGGTTTCCACACGACCTGGGGCGCGTTTAGTTTTCCTTTTATTTTTCTCGCCACCGATCTTACCGTGCGTATTTTTGGCGCACCGCTGGCGCGCCGCATTATCTTCGCCGTCATGATCCCTGCGCTGCTGGTGTCATATGTGGTGTCATCGCTGTTCTATATGGGCGCCTGGCAAGGTTTCGCCGCGCTGGCGAACTTTAATCTGTTTGTCGCCCGTATCGCCGCCGCCAGCTTTATGGCCTACGCGCTGGGACAGATCCTTGATGTCCATGTGTTTAACCGCCTG…	ATG	TAA
dxs	ATGAGTTTTGATATAGCCAAATACCCTACCCTGGCATTGGTCGACTCCACCCAGGAGTTACGACTGTTACCGAAAGAGAGTCTGCCGAAACTCTGCGACGAGCTACGCCGCTACTTACTCGACAGCGTAAGCCGTTCCAGCGGGCATTTCGCTTCCGGGCTGGGCACGGTAGAACTTACCGTGGCGCTGCATTATGTCTACAACACCCCGTTTGACCAGCTAATCTGGGATGTTGGACACCAGGCTTATCCACATAAAATCCTTACCGGTCGTCGCGACAAAATCGGCACCATTCGCCAGAAAGGCGGTCTGCACCCGTTCCCGTGGCGCGGAGAAAGCGAATACGATGTGCTGAGCGTTGGGCATTCCTCCACCTCCATCAGCGCCGGTATCGGTATT…	ATG	TAA
yacC	ATGAATAATGATGAGCTGGCCACCAGACGTGCGCAGGCGATTGCCGAAGACAGGTGTTTCTCGAAAGGACGTTTGCGCGATGAATTCAGAATGAAACCAGCCCCCGGTGCTGAGCCGGTTAAGTGGTATAAAAACACTTATGGTGGCAGGTTCGCTGTATACCGAATTGCAGACTGTGTTCCGATGCGTGAGAAACGCCCTCTGACGAGTAAACAACAGCTGGCTGGCCAGCGACTTTCCGTTTTATCCAGACTTAACAGCACCAGTGGCCGGATGGCACGGCAGGCATATGACTGGCTGAGTCTGGCACCGCTCTTTCTGGATACTGAAACGACAGGACTGGATAATACCGCGGAAGCCCTGGAAATCGGCCTGACCGATGCGGCCGGTCAGGTGGTA…	ATG	TGA
rnfD	ATGGTATTCAGAATCGCAAGCTCGCCTTATACCCATAACCAGCGCCAGACATCGCGAATCATGTTGCTGGTATTAATCGCCGCTCTGCCGGGGATTGCCGCGCAGACGTGGTTTTTTGGTTGGGGAACGCTTTTCCAGATCGTTCTGGCTGCTATCACGGCGCTCGTCGCAGAAGCCATTGTCCTCAGGCTGCGCAAACAATCGGTCGCCAGTCACCTGCAGGATTATTCCGCGTTATTGACGGGGCTTTTGCTGGCGGTCAGCATCCCTCCGCTTGCGCCCTGGTGGATGGTCGTGCTGGGAACCGGATTCGCCATTATTATCGCTAAACAGTTATATGGCGGGCTGGGACAAAACCCCTTTAATCCGGCCATGATCGGTTACGTGGTGCTATTAATT…	ATG	TAA
fhuC	ATGCAGGAAAACCACATTCATTCCGATACCACCTTTGCGCTGCGAAGCGTCGCCTTTCGTGTGCCGGGCCGCACGCTTTTACACCCCCTCTCGTTAACGTTTCCCGCAGGTCGCGTCACCGGACTTATTGGTCATAATGGTTCCGGTAAATCCACGCTGTTAAAAATGCTGGGCCGCCATCAGCCGCCTTCCGAAGGGGATATTCTGCTCGACAATCAGCCGCTGGCGAGCTGGAGCAGCAAGGCGTTTGCCCGCAAAGTTGCCTATCTGCCTCAACAATTGCCACAGGCGGAAGGAATGACGGTGCGCGAACTGGTGGCGATTGGCCGCTATCCGTGGCACGGCGCGCTGGGACGCTTTGGCGTCGCGGACCGGGAAAAAGTAGACGAGGCGATTACG…	ATG	TAA
tldD	ATGAGTCTGAACCTGGTAAGTGAACAATTGCTAGCGGCGAATGGCCTGAACCATCAGGATCTGTTCGCTATTTTGGGCCAACTGGCCGAACGCCGTCTTGATTATGGCGACCTCTATTTTCAGTCGAGCTATCACGAATCCTGGGTTTTAGAAGACCGCATCATTAAAGATGGTTCATATAATATCGACCAGGGCGTTGGCGTTCGCGCCATTAGCGGCGAAAAAACCGGTTTTGCTTATGCTGATCAGATAAGCCTCCTGGCGCTGGAGCAGAGTGCGCAGGCAGCGCGAACCATTGTACGCGAGAACGGCGAAGGCAAGGTAAAAACGCTCGCCGCCGTAGCGCATCAGCCGCTCTACACCACCCTTGATCCGCTGCAAAGTATGAGCCGCGAAGAG…	ATG	TAA
SL1344_2552A	ATGACTATGTCGCGCGTAATTTCGCTGGCGGCAGGGGTTTCCCTGTCCGTTTTATTTTCCACCGCTGCCGTTGCCGATAACGGAAGAGGAAGCGGTAACAGCAATATTGAAAACCAGACCCGGATTTATACCGGTACTGACCGCGGGCAGAAACAGCACCGCGAGGCAAAGGGACAAATAATCACGCGGAGCGTCCAGTGTTCGCTGCCGGCATATTTACGTGACCCGGATAATCAGTGCTGA	ATG	TGA
purB	ATGGAATTATCCTCACTGACCGCCGTTTCCCCTGTCGATGGACGCTACGGCGATAAAGTCAGCGCGCTGCGCGGAATTTTTAGCGAATACGGTTTGCTGAAATTTCGTGTACAAGTCGAAGTACGTTGGCTGCAGAAATTAGCCGCGCACGCAGCGATCAAGGAAGTTCCTGCTTTTGCTGCCGACGCAAACGGTTACCTGGATACGCTTGTGGCAAACTTCAATGAAGAAGATGCCGCGCGCATTAAAACCATTGAGCGTACGACTAACCATGATGTGAAGGCAGTTGAGTATTTCCTGAAAGAAAAAGTCGCCGCGATCCCGGCGCTACATGACGTTTCCGAATTTATCCACTTTGCCTGCACTTCTGAGGACATTAACAACCTGTCGCACGCGTTA…	ATG	TAA
malQ	ATGGAAAATAAACGTCTCGATAGTGCCGCGCTGGCGGCGGGGATCAGCCCCAGTTACATCAATGCTCATGGCAAACCGCAGTCTATTGGCGCTGAAACCAAGAGACGTTTGCTGGCGGCGATGCACGGCACGACAACAGGACCACAGGCGGTCGTGCCGAATGTGAAGGTTTATACCGCGGGTAAAAAAATGGCGTTGCCGGTAGAGGGGCGCGGTGAGTTTGCCTGGCTGCTGACTACGGAAGAGGGCGTGCATTACAAAGGGCGCGTGACGGGCGGTAAAAAACTTAACCTTCCGGCTACATTGCCGGAGGGCTACCACACCCTGACGTTGACCCAGGATGAACAGCGTACGCACTGCCGTATTATCGTCGCCCCGCCGCGATGCTATGAGCCGCAG…	ATG	TAA
SL1344_2434	ATGGGGGACGAAAAGAGCTTAGCGCACACCCGATGGAACTGTAAATATCACATAGTTTTCGCGCCCAAATACCGAAGACAAGCGTTCTATGGAGAGAAGCGTAGGGCAGTAGGCAGCATATTAAGAAAATTGTGTGAATGGAAAAACGTACGAATTCTGGAAGCAGAATGTTGTGCAGATCATATTCACATGCTTCTGGAGATCCCGCCGAAGATGAGTGTGTCGAGTTTCATGGGATATCTGAAGGGTAAAAGTAGTCTGATGCTTTACGAGCAGTTTGGGGATCTAAAATTCAAATACAGGAACAGGGAGTTCTGGTGCAGAGGGTACTATGTCGATACGGTGGGTAAGAACACGGCGAAGATACAGGACTACATAAAGCACCAGCTTGAAGAGGAT…	ATG	TAA
mtlR	ATGACGCAGAATCCGGCGCAGGTTAGCCTGCGCCCAAATAACAGATTGTCAGATATGCAGGCAATAATGGAACAAACCCAGGCCTTTGAAAATCGTGTGCTTGAGCGTCTGAATGCTGGCAAAACCGTAAGGAGCTTCCTGATTACCGCCGTCGAGTTATTGACCGAGGCGGTGAATATTCTGGTGCTTCAGGTGTTTCGCAAAGACGACTATGCCGTGAAATACGCTGTGGAACCGTTGCTGGACGGCGACGGGCCGCTGGGCGATCTTTCGGTACGTCTGAAACTTATCTATGGCCTGGGCGTACTCAGCCGCACCGAATATGAAGATGCGGAGCTGTTAATGGCGCTGCGCGAAGAGCTGAATCACGATGGCAATGAGTACGCCTTTACCGACGAT…	ATG	TAA
SL1344_3176	ATGCCAAAATTACGCCTGATTGGACTAACTTTACTTGCGCTTAGCGCCACCGCCGTCTCTCATGCTGAAGAGACGCGTTACGTTTCTGATGAACTGAATACCTGGGTCCGCAGCGGTCCGGGAGATAATTATCGCCTTGTGGGTACCGTCAACGCCGGCGAGGAAGTCACGCTCTTACAGAGCGATGCCAACTATGGTCAAATCAAAGACAGTTCTGGTCGTACTGCCTGGATACCGTTAAAAGAACTGAATACCACGCCAAGCCTGCGTACCCGCGTGCCGGATCTGGAAAATCAGGTCAAAACGTTGACTGATAAACTCAACAATATTGATACCACGTGGAATCAGCGCACCGCCGATATGCAGCAGAAAGTGGCGCAAAGCGACAGCGTCATCAAC…	ATG	TAA
pgsA	ATGCAATTTAATATCCCTACGTTGCTCACGCTGTTTCGCGTCATCCTGATTCCATTCTTTGTCGTGGTGTTTTATTTGCCGTTCGCCTGGGCGCCGATGGTCAGCGCGCTGATTTTCTGTATTGCCGCTATTACCGACTGGTTTGACGGCTTTCTGGCGCGACGCTGGAACCAGAGTACGCGTTTCGGCGCTTTCCTCGACCCCGTCGCCGACAAGGTGCTGGTGGCGATCGCCATGGTGCTGGTCACCGAGCATTATCATAGCTGGTGGGTGACGTTACCTGCGGCGACGATGATAGCCCGCGAAATTATTATCTCTGCTCTGCGTGAATGGATGGCGGAGCTGGGCAAACGCAGTAGTGTAGCGGTCTCCTGGATCGGTAAAGTCAAAACTACCGCG…	ATG	TGA
pqiA	ATGTGTGAACATCACCATGCTGCGAAGCACATATTGTGCCCGCAATGTGACATGCTGGTGGCTTTACCCCGCCTCTCGCATGGGCAAAAAGCAGCATGTCCACGATGCGGCGCAACGTTAACGACCGAGTGGGACGCGCCCCGGCAGCGTCCTACCGCCTATGCGTTAGCGGCACTATTTATGTTGCTGCTTTCTAACCTTTTTCCCTTCGTGAATATGAATGTCGCGGGCGTCACCAGCGAAGTCACGCTTCTGGAAATCCCCGGCGTCATGTTTTCTGAAGATTACGCCAGCCTCGGCACGTTCTTTTTATTATTTGTCCAACTGGTGCCGGCATTTTGCCTGGTGACCATTCTATTACTTGTCAACCGCGCCAGTCTGCCGTTGTCGGTAAAAAAA…	ATG	TGA
rpsQ	ATGACCGATAAAATCCGTACTCTGCAAGGTCGCGTGGTTAGCGACAAAATGGAGAAATCCATTGTTGTTGCTATCGAACGTTTTGTGAAACACCCGATCTACGGTAAATTCATCAAGCGTACGACCAAAATGCACGTACATGACGAGAACAACGAATGCGGTATCGGCGACGTGGTTGAAATCCGCGAATGCCGTCCGCTGTCCAAGACCAAATCCTGGACTCTGGTTCGCGTTGTAGAGAAAGCGGTTCTGTAA	ATG	TAA
yejK	ATGAGTCTGGATATCAACCAGATTGCCCTGCACCAGCTTATCAAGCGCGATGAGCAAAATCTTGAGCTGGTCTTGCGCGATTCATTGCTGGAGCCGACAACCACCGTTGTCGAGATGGTGGCTGAACTGCATCGGGTCTATAGCGCCAAGAATAAGGCGTATGGCCTGTTTAATGAAGAGAGTGAACTGGCGCAAGCGCTGCGGTTGCAACGTCAGGGGGAAGAAGATTTTCTTGCCTTTAGCCGGGCGGCGACCGGACGCCTGCGTGACGAACTGGCGAAATATCCCTTTGCGGACGGCGGCATTGTATTGTTCTGCCATTATCGTTACCTGGCGGTGGAGTATCTGCTGGTTACGGTACTGAACAACCTGAGTAGTATGCGGGTCAATGAAAATCTG…	ATG	TAA
SL1344_0656	ATGAGCGACGACAATTCACACAGTAGTGACACAGTAAACAGTAAAAAGGGATTTTTTTCCCTGCTACTCAGCCAGCTTTTCCACGGTGAACCTAAAAACCGTGATGAGTTGCTGGCGCTGATCCGTGATTCCGGGCAGAACGAGCTTATCGATGAAGATACGCGCGATATGCTCGAAGGCGTAATGGACATCGCCGACCAGCGCGTTCGCGATATTATGATCCCGCGCTCCCAGATGATTACCCTAAAACGCAACCAGACGCTGGACGAATGTCTTGATGTTATCATCGAGTCCGCCCACTCGCGTTTTCCGGTGATCAGCGAAGATAAAGATCACATTGAAGGGATTCTGATGGCCAAAGATTTGCTGCCGTTTATGCGCAGCGATGCCGAAGCCTTC…	ATG	TAA
yigN	GTGGATATTACTCTTATGATAAGCGCCGTCGTGGCGCTGGCGGCTGGGGCGGTGATTGGCTGGCTGGCGACGAAAGCGCACGCCGATCAAATCCGCGCCGATCTTATCGAAGAACGGCGTGAGCTGGATATCGAACTTAGCGCGGCCCGGCAGCAATTAGCGCAAGAAGCGCACTGGCGCAGTGAATGCGAGTTACTTAATAACGAACTGCGTAGCCTGCACAGTATTAATACCTCTCTGGAAGCCGATCTGCGTGAAGTCACGACCCGTCTGGAAGCGACTCAGCAACACGCGGAAGACAAAATCCGTCAGATGATCAACAGCGAACAGCGTTTAAGCGAGCAGTTTGAAAATCTGGCGAACCGTATCTTTGAACACAGTAATCGTCGCGTAGACGAA…	GTG	TAA
SL1344_2940	ATGAAAATAGTGATCGCACCAGACTCGTATAAGGAAAGTTTGAGTGCTCTTGAGGTAGCGACCGCCATTGAACAAGGATTTCGCGAGATCTGGCCTGACGCCGATTACCTGAAATTGCCGCTGGCTGATGGCGGAGAAGGTACTGTCGAAGCGATGGTTGAAGCGACGGCGGGTCGAATCGTGCATGTTGAGGTCACCGGGCCGTTGGGGCATCGCGTCAATGCGTTTTATGGGCTTTCCGGCGATGCGCGTTCCGCGTTCATTGAAATGGCGGCCGCCAGCGGGCTGGAGCAGGTGCCGCCCGCGCAACGCGATCCGTTGAAGACCACGTCATGGGGAACCGGCGAGCTGATCCGTCATGCGCTGGATGCGGGCGTTGAGCATATCATTATTGGTATC…	ATG	TGA
miaA	ATGAATGATGTAAGCAAGGCGAGCCTGCCTAAGGCGATATTTTTGATGGGGCCGACGGCCTCCGGCAAAACGGCGCTGGCGATAGAACTGCGTAAAGTTTTGCCAGTAGAGTTGATAAGCGTTGATTCCGCCCTCATTTATCGGGGAATGGATATTGGCACGGCTAAGCCGAATGCCGATGAGCTGAAAGCGGCGCCGCATCGACTGTTGGATATACGCGACCCGTCGCAGGCGTATTCGGCGGCGGATTTTCGCCGCGACGCGTTAGCGCAAATGGCGGAGATCACCGCTGCGGGGCGTATCCCGCTGTTAGTGGGCGGTACCATGCTGTATTTTAAGGCATTGCTGGAAGGGTTATCGCCGCTGCCTTCAGCAGATCCGGAAGTCAGATCCCGGATA…	ATG	TGA
stjB	GTGAAGTATTTAAAACTGCCGCTATACATCAAAACTGCGCTTTATTGCTCACTGGCAACCACGACGTTTTCAGCTCTGGCGGAGGAGCTGAATTTTGACATGGGTATTCTCACCTCCAGAGGCATTAGCCCCAACGTCGCACAATATTTTTCCCGCGCGCCGCGCTTTCTACCAGGCAGCCACACCGTCATGGTAAAGATCAATGGCGTAAATAGAGGGTCGTTGGTCGCGCGTTTCGACACAGAAGGCCAGCTTTGCGTGGATGACGATTTCCTCAGCGCCAGCGGGCTCGTTTCGCTTAATATCAGCGCCAAAGAAACCTGCCATAGCCTACAAGAAGATTATCCCTCAGCGATTATTACCCCACTGCCAAACAGTGAATCGCTGGAGCTTTTTGTT…	GTG	TGA
SL1344_1628	ATGCCGTTTACATTTCAGATCGGAAATCATAGTTGCCAGATATCAGAAAGGTATTTAAGAGATATCATCGATAATAAAAGAGAACATGTTTTTTCAACGTGTGAGAAATTTATAGATTTTTTCAGGAATATATTTACCAGGCGAAGTTTAATTTCTGATTATAGAGAAATCTATAATCTACTGTGCCAAAAAAAAGAGCATCCCGATATTAAAGGGCCTTTCTCTCCAGGACCATTTTCGAAGCGAGATGAAGACTGTACACGATGGCGCCCCCTTCTTGGATATATTAAACTTATTGATGCCTCCAGACCTGAAACAATAGATAAATACACTGTAGAGGTATTAGCACATCAAGAAAATATGTTACTACTACAGATGTTTTACGATGGAGTATTAGTG…	ATG	TAG
fixC	ATGTCCGAAGATATCTTTGATGCCATCATCGTGGGTGCAGGTCTGGCCGGTTCGGTTGCGGCGCTGGTGCTTGCTCGCGAAGGTGCACAGGTGCTGGTTATCGAGCGCGGCAATTCTGCTGGCGCGAAGAATGTCACCGGTGGGCGCTTGTATGCACATAGCCTGGAACGCATCATTCCCGGCTTTGCGGATCAGGCCCCCATTGAACGCATGATCACCCACGAAAAACTCGCCTTTATGACCGACAACGGGGCGATGACTATCGACTACTGCAATGGTGAAGATGCTTCAGCGTCGCAGGTTTCCTATTCCGTCTTACGCAGTAAATTTGACGCCTGGCTGATGGAGCAGGCCGAAGAGGCGGGGGCGCAACTGATCACCGGTATTCGCGTGGATAAC…	ATG	TGA
SL1344_0415	ATGCAATACAACACGTTAGGAAATACAGATCTTCGGGTATCCCGCCTTTGTCTGGGCTGTATGACATTCGGCGAGCCAAGTCGCGGCAATCACGCCTGGACGCTTCCCGAAGAGAGCAGCCGTCCCATCATCAAGCGCGCTCTTGAGGGCGGCATTAACTTTTTTGATACCGCCAACAGCTACTCCGACGGCAGCAGCGAAGAGATTGTCGGTCGCGCGCTGCGTGATTTTGCCCGGCGCGACGAGGTGGTGGTAGCGACGAAAGTCTTCCATCGCGTCGGCGATCTGCCGGAAGGATTGTCCCGCGCACAAATCCTGCGCTCTATTGACGATAGCCTCGCCCGTCTGGGAATGGAGTATGTCGATATCCTGCAAATCCACCGCTGGGATTACACCACG…	ATG	TAA
yacB	ATGATGGAGATATTCTGGACCATGCTGGCCAGCCAGGACAGGAAGCGCATTCGTGAGTACATTGCGGAGCAGAACCTGATGGCTGCCATTGAACTGGACGAACGGATTGGTTATTCAGCCAGCAGCCTGGCCGGGCAGCCGTATAAAGGCCGCAACGGTCGTGTGGAAGGTACCCGGGAACTGGTTATTCACCCGCATTTTGTTCTGGTTTATGAGGTCGACAGCCAGTGGGGAAAAGTGTATATCCTGCGCGTGTTGCATACTGCACAGAAGTGGCCATAG	ATG	TAG
rnfG	ATGCTGAAAACGATTCGTAAACACGGTATTACGCTGGCGCTTTTTGCCGCAGGCTCTACGGGATTGACCGCGGTGATTAATCAGATGACAAAATCAACCATCCACGAACAAGCGCTGCAACAACAACATGCCCTGTTCGATCAGGTATTGCCGCCAGATCGTTACAATAATAATCTGCAAGAGAGTTGTTATCTGGTCGATGCGCCCGCCCTCGGCAAAGGCACACACCGTGTTTTTATCGCTCGCAAGGATGATAAACCCGTAGCGGCCATCATTGAGGCTACCGCGCCAGATGGCTATTCCGGCGCTATCCAGCTTATTGTTGGCGCAGATTTCAACGGTACCGTCCTGGGGACGCGTGTGACGGAACATCATGAGACGCCAGGGTTAGGTGATAAA…	ATG	TAG
SL1344_2552	ATGCCAGTACTTATTTCCGGCGTACTGAAAGATGGTACGGGAACGCCGGTACAGAACTGCACCATTCAGCTGAAGGCCTGCCGGACCAGTACGACGGTGGTCGTGAATACGGTGGCATCGGAAAATCCGGATGACGCCGGGCGCTACAGCATGGATGTGGAGCAGGGGCAGTACACAGTCACGCTCCTGGTGGAAGGGTATCCCCCGTCACATGCCGGAGTTATTACGGTCTACGATGATTCAAAACCGGGCACCCTGAATGATTTTCTGGGGGCCATGACGGAAGACGACGTCCGCCCGGAGGCGCTGCGACGTTTTGAGGCGATGGTGGAAGAAGTTGCCCGCCAGGCATCGGAGGCATCGCGGAATGCCACCGCCGCAGGGCAGGCATCTGAACAG…	ATG	TGA
SL1344_4453	ATGCGGCTAAAAGTAAAAGAAAACATTACGCTTTGGAGAAATGAAGGTTTAATTGCTTATGTCGCCCTTGGATTTCTATGTACTTTTTTTATGGAGGTCAACGCTCTATTACCATACTATCTTCAGCAAAGTATATTTTTCGAAACGCTGATGAGCTACATGGCCTTCAATACGTTATTTTCGCTTGCTTTATCTGAGATTTTTTTTGCGATGTTGGTAGTTATTTGTCATAACACTAAACTGGAAAAGATCACAAATAGTATTTTGCAAGAGTTGCATAAAAGAATTATGCAAGGTTCTTTCATTATATCCTTCTTATGCTTCGGAATATTTCTATTTTGTGTGATGGCATTCTGTATTGGTTCGCTAACAATAAATAATAATTACTATGGGAAACAT…	ATG	TAG
eutS	ATGAATAAAGAACGCATTATTCAGGAATTTGTGCCGGGCAAACAGGTCACGCTGGCGCATCTCATTGCGCACCCTGGTGAAGAACTGGCGAAAAAGATCGGCGTTCCCGATGCTGGCGCGATTGGCATTATGACTTTAACGCCGGGGGAAACGGCGATGATCGCTGGCGATTTAGCGATGAAGGCTGCGGATGTACACATCGGTTTTCTCGATAGATTTAGCGGCGCGCTGGTGATTTATGGCACCGTCGGCGCAGTAGAAGAAGCGCTATTACAGACGGTCAGCGGGCTGGGGCGATTATTAAACTTTACCCTGTGTGAGTTAACAAAAAGTTAA	ATG	TAA
amn	ATGGAAAATAAAGGCACAAACCTAACGCCCGAGCAGGCGCTGGATCGCCTGGAGGAGCTATACGAGCAGTCGGTTAACGCGCTCCGTGAAGCCATCGCTGACTATGTTGATAACGGTACGCTGCCCGATCCCCACGCCAGGCTTAACGGACTGTTTGTTTATCCTTCGCTGTCTGTAAGCTGGGATGGCGCGACACCGAACCCGCCTAAAACACGCGCTTTTGGACGCTTTACTCATCCCGGCTGTTATACCACTACCGTTACGCGGCCTGCGCTATTTCGCGCTTATCTTCTGGAACAGCTTAACCTCGTTTACCATGATTATGGCGCGCATATTGCGGTAGAGGCCTCGCACCATGAGATCCCGTATCCTTATGTGATCGATGGCTCGGCTCTGACG…	ATG	TAA
SL1344_2718	ATGAATCGTGTTGTTGTGTCCGGCGCGGCAGAATCTCCTCAGATTGAAACGAAGAGGAGACCCGACATGACTCATACCGCTGTTATTCCCGACTACCTTAAACCTGCAATGGAACGCCTTGAGACTGCCCGCTCGGCGCATCTCGCCAATGCCAGCCGTATGGATGAAACCACGACGGCCATCAGCCAGGTGCAAACGCAAAAAAATGAACTGGAGCAGGAAAACGGCAATGATTCCGGCGCATGGCGCGCCGCCTTTCGTGCCGGTGGTGCTGTCATTACCGACGAGCTTAAACAACGCCATCTGGCGCGCGTGGCACGGCGGGAACTGGCGCAGGAATGTGACAGCATGAACGAGGTACTGTCTTTTGAGCTGGACAGGCTCAAAGGAGCCTGTGAC…	ATG	TGA
mtlD	ATGAAAGCATTACATTTTGGCGCAGGTAATATCGGTCGTGGCTTTATCGGCAAATTGCTGGCTGACGCGGGGATACAACTGACGTTTGCGGATGTAAACCAGGTCGTACTCGATGCCCTGAATGCCCGTCATAGCTATCAGGTTCATGTTGTGGGTGAAAATGAGCAGGTGGATACCGTTTCCGGCGTCAACGCTGTCAGCAGCATCGGCGATGATGTTGTCGACCTGATTGCCCACGTTGATTTAATCACCACTGCCGTGGGCCCGGTGGTGCTTGAGCGTATCGCTCCGGCTATCGCTAAAGGGCTGGTAAAACGTAAGGCGCAGGGCGTGGATGCCCCGCTGAATATCATCGCCTGTGAAAATATGGTGCGCGGCACCACGCAGCTGAAAGGCCAC…	ATG	TGA
SL1344_3175	ATGGCTCAGGAAATCGAATTAAAGTTTATCGTCAATCACGACGCCGTAGATGCGCTGCGAAATCATCTTCATACGCTCGGCGGCGAGCATCATGCGCCCAGCCAGTTGCTGAATATCTACTTCGAAACGCCTGATAACTGGCTACGCCGCCATGATATGGGGCTGCGTATTCGTGGTGAAAATGGGCGCTATGAAATGACCATGAAAATTGCCGGCCGGGTAACGGGGGGGCTGCACCAGCGACCCGAATACAATGTCGCGCTAAGCGAACCCGTGCTGGATCTGACGCAACTTCCGGCGGAGGTCTGGCCGGATGGCAACCTGCCCGCCGGCCTGGCATCAAGCGTACAGCCGCTGTTCAGTACCGATTTTTACCGGGAAAAATGGTGTCTGGACGTT…	ATG	TAA
SL1344_1874	ATGCTGATATGTTTTATGCCTGCTTTATTAAAGAGAGTAGGTCTGCCAGTGAAATATACCGATAATGCAAAATTATTTATTAGCTTCATTAATATTGGGATTGTAGGTTGCGCTTTGCTACTTTTTTTTATTTTGTATGAGCCTGAGAGTGCAATCGTAACCTACTCTTTTCCAGGAGAGCTTTCCTCTTCGACATGTGATGCGCGTAATTTTATTGGCTACGTCGATGAAAACGACTTTGCAGAGTATATAAAAAAAGTAGAACTGACGCGCTACAGTATGTATTGTCTGAAAAAAACAGGGGCGGGTCAGTGGAGTATTTATGCAAATTAA	ATG	TAA
SL1344_1002	ATGTCATTAATCAGTATGCATGGCGCATGGCTGTCGTTCAGCGACGCGCCGCTTCTCGATAACGCAGAGTTGCATATCGAAGATAACGAACGCGTCTGTCTGGTGGGGCGTAACGGCGCCGGGAAATCCACCTTGATGAAGATCCTCAACCGCGAACAGGGTCTGGACGATGGGCGTATTATTTATGAGCAGGATCTGATCGTCGCGCGTCTGCAACAGGACCCGCCCCGTAATATTGCGGGCAGCGTCTATGACTTTGTCGCCGAAGGTATCGAAGAACAAGCGGAATACCTCAAGCGCTATCATGAGATTTCCCGTCTGGTGATGACCGATCCCAGCGAGAAAAACCTCAATGAAATGGCGCGCGTACAGGAACAGCTCGATCATCATAATCTGTGG…	ATG	TAA
udp	ATGTCCAAGTCTGATGTTTTTCATCTCGGCCTCACCAAAAACGATTTACAAGGGGCCCAGCTCGCCATCGTCCCTGGCGATCCTGAGCGTGTGGAAAAGATCGCCGCGCTGATGGATAAGCCGGTTAAGCTGGCATCTCACCGCGAATTCACCTCCTGGCGCGCTGAGCTGGATGGCAAAGCAGTTATCGTTTGCTCTACCGGTATCGGTGGCCCGTCTACCTCTATTGCCGTGGAAGAACTGGCGCAACTGGGTATTCGTACCTTCTTGCGTATCGGCACCACGGGGGCTATTCAGCCGCACATTAACGTCGGCGACGTTCTGGTAACGACCGCATCCGTACGTCTGGATGGGGCGAGCCTGCATTTTGCGCCGATGGAATTCCCGGCGGTTGCCGAC…	ATG	TAA
SL1344_2202	GTGAGTAAAGGAATACGTCAGAGGCCGCCTGTTAATTTCAGTTTATTTCGGCAGGTTTTGTATGCGCACATTGTCGCATTTTTGATGATGTTGATGCTCGGCATGGTGTTCACCGTTCTCTCGTTGGTACTGTTTTATACTTATGGCACCAACTGGTTACTGAGCTTGTTCATATGCCCGCTGTTCTTGTTAAGTGGTTTATTCATTACTGGATTTGCTTTTAAATCAACCTGGTCCAGCATACGTTACTATTACGACAAGGGGCAGTTGAAACGGTATGGACTCAATCTTGATGCAACTTTGACGCATAAAGAGAAGGTGGAAATACGCATCGATAATGCAAAGCGTCAAGTGCGTGTAGATGAACTGGAACTCCATGTCTTATTTGATTTTCAGTTT…	GTG	TAA
lnt	ATGGCATTTGCCTCGTTAATTGAACGCCAGCGTATTCGCCTGCTGCTGGCGTTATTATTCGGCGCCTGCGGAACACTGGCTTTCTCTCCGTATGACGTCTGGCCCGCAGCGATAGTGTCGCTTATCGGGCTGCAGGCCTTAACGTTTAATCGCCGCCCGCTCCAGTCTGCCGCCATCGGCTATTGCTGGGGACTCGGACTTTTCGGTAGCGGGATTAACTGGGTTTATGTCAGTATCGCGCAGTTTGGCGGCATGCCGGGCCCGGTTAACGTTTTTCTGGTGGTGCTGCTTGCAGCTTATCTCTCGCTGTATACCGGACTGTTTGCCGGGATTTTGTCGCGCCTGTGGCCAAAAACCAACTGGCTGCGCGTCGCTATCGCCGCGCCTGCAATATGGCAA…	ATG	TAA
barA	ATGACCAACTACAGCCTGCGCGCACGCATGATGATTCTGATCCTGGCCCCGACCGTCCTGATAGGTTTGCTGCTCAGTATCTTTTTTGTAGTGCACCGCTATAACGACCTGCAGCGTCAACTGGAAGATGCCGGCGCCAGTATTATTGAACCGCTCGCCGTCTCCAGCGAATATGGTATGAACTTACAAAACCGGGAGTCTATCGGCCAACTTATCAGCGTCCTGCACCGCAGACACTCTGATATTGTGCGGGCGATTTCCGTTTATGACGATCATAACCGTCTGTTTGTAACGTCTAATTTCCATCTGGACCCCTCACAGATGCAGCTTCCCGCCGGAGCGCCGTTTCCACGTCGTCTGAGCGTTGATCGCCACGGCGATATTATGATTCTGCGCACC…	ATG	TGA
mutL	ATGCCGATTCAGGTTCTGCCGCCGCAGCTTGCGAACCAAATCGCCGCTGGCGAAGTGGTGGAACGCCCTGCGTCGGTTGTTAAAGAGCTGGTAGAGAATAGTCTGGATGCAGGCGCCACCCGCGTTGATATCGACATCGAGCGTGGCGGCGCGAAGCTTATTCGTATTCGCGACAATGGCTGCGGCATTAAAAAAGAGGAGCTGGCGCTGGCGCTGGCCCGTCATGCCACCAGTAAAATCGCCTCGCTTGACGATCTGGAAGCGATTATCAGTCTGGGATTTCGCGGCGAAGCGCTGGCCAGTATCAGTTCGGTCTCGCGTTTGACGCTAACGTCGCGCACGGCGGAGCAGGCGGAAGCCTGGCAGGCGTATGCGGAAGGGCGCGATATGGACGTGACG…	ATG	TGA
SL1344_4137	ATGGCGATAGCCGAACCCGACTTTATTGACCGCGACCCCGCGCAAATCACCAGCGAGATGATTGCGCAATATGAAGAAGCCAGCGGTAAAAAACTCTACCCGGCGCAGGCTGAGCGGCTGCTCATTGACCTGTTTGCTTATCGTGAAAACCTTGTCCGCATCGCCATCCAGGAGGCAGCGAAGCAAAACCTGGTCGCGTATTCCCGTGCGCCGATGCTGGATTATTTAGGCGAGCTGGTTGGCGTTCACCGTCTGCCCGCTCAGGCGGCAAAAACCACGCTGCAGTTTTCTGTTACTCAAGCGGCTAAAAGTAACCTGGTGATTCCACAGGGTACCCGCGCCAGCGCGTCGGATAGCGTGATGTTCGCCACCGACGAAGATGTTCTGTTGCCTGCGGGC…	ATG	TAA
SL1344_1627	ATGCGCTATTTTTTTATGGCAGAGCCGATAAGGGCAATGGAGGGGGATTTACTGGGTGTCGAAATCACTACCCATTTTGCATCGTCGCCCGCTCGTCCGCTACATCCTGAGTTTGTTATCTCGTCATGGGACAATTCGCAGAAGCGCCGTTTTCTGCTTGATCTGTTGCGGACAATCGCGGCCAAACATGGCTGGTTTCTACGCCACGGCCTATTCTGTATCGTAAATATTGATCGGGGTATGGCGCAGCTTGTCCTTCAGGATAAAGATATTCGCGCATTACTACACGCCATGCTATTTGTGGAGCTGCAGGTCGCTGAACATTTTTCATGTCAAGATAACGCCTTAATCGATCCTTTAATACACGCGCTTCATAAGCAACCTAATCCATTATGGCTG…	ATG	TGA
fixB	ATGAACAAATTTTCCAGTGTCTGGGTATTCAGCGATACCCCTTCTCGTCTGCCCGAACTGATGAGTGGCGCGCAGGCTGTAGGTGAAAAAGTTAACGCGTTCGTACTGAACGAAGCAGACAGCGCGACAGCATGTCATTTGGGCGCGGATCATGTCTGGCTGCTCAGCGGCAAACCAGAAGACCGCATGATCGAAGACTACGCTGCTGCGATGGCTGAGACTATTCGTCAGCATAGCGAGGGCGGCGCGGTGCTGCTGCCGAATACGCGTCGGGGCAAGCTGTTGGCGGCAAAGCTGGGCTATCGCTTGTCGGCTGCGGTTTCCAACGATGCCAGCGACGTCTCCCTGCAGGATGGAAAAGCGGCGGTTAAACATATGGTCTACGGCGGTCTGGCGATA…	ATG	TAA
SL1344_0414	ATGACCATTTTGCCACGCCATAAAGATGTTGCGAAAAGTCGCCTGAATTTGCGCAATCCGTGGCACCTGCTCGCTACCGGCTTTGGCAGCGGGCTGAGCCCCGTGGTGCCGGGCACGATGGGCTCGCTGGCGGCGATCCCCTTCTGGTATTTGATGACGTTTCTGCCGTGGCAGCTTTATTCGCTGGTCGTGATGTTTGGGATCTGCATTGGCGTTTATCTTTGCCATCAGACGGCGAAAGATATGGGCGTACACGACCACGGCAGTATTGTCTGGGATGAATTTATCGGTATGTGGATAACGCTAATGGCGTTGCCGACGACGGACTGGCAGTGGGTGGCTGCCGGGTTCGTTATTTTCCGCATTCTGGATATGTGGAAACCCTGGCCGATCCGTTGG…	ATG	TAA
yacA	ATGGCACAGGTTAATATGAGTTTAAGAATCGACGCTGAACTGAAGGATGCTTTTATGGCCGCTGCAAAAAGCATGGACCGTAATGGCTCTCAGTTAATCCGGGATTTTATGCGCCAGACCGTTGAACGGCAGCATAATACCTGGTTCCGTGACCAGGTTGCGGCAGGACGTCAGCAACTCGAGCACGGCGATGTGCTTCCCCATGACATGGTCGAATCCTCTGCTGCAGCATGGCGGGATGAAATGAGCAGGAAGGTTGCCGGTAAATGA	ATG	TGA
rnfE	ATGAGCGAAATAAAAGACATTGTTGTTCAGGGGTTATGGAAAAATAACTCTGCTCTGGTGCAGCTACTTGGCCTGTGCCCTCTACTGGCGGTGACGTCTACGGCAACCAACGCTCTGGGGCTGGGTCTGGCCACAACGCTGGTATTAACGCTGACCAACCTTACGGTGTCCGCACTACGTCGCTGGACGCCGGCAGAAATCCGTATCCCGATTTACGTCATGATCATTGCCTCGGTGGTAAGCGCAGTACAGATGCTGATCAATGCGTATGCGTTCGGTTTGTATCAGTCTTTAGGGATTTTTATTCCTCTGATTGTAACGAACTGCATTGTTGTTGGTCGCGCCGAAGCGTTTGCCGCGAAAAAAGGACCGTGGCTTTCCGCGTTGGACGGTTTTTCC…	ATG	TGA
fhuA	ATGGCGCGTCTTAAAACTGCTCAGCCAAACTCCTCACTGCGTAAAATCGCAGTTGTAGTAGCCACAGCGGTTAGCGGCATGTCTGTCTATGCACAGGCGGCGGTTCAACCGAAAGAAGAAACCATTACCGTAACCGCAGCGCCTGCCGCGCAGGAAAGTGCCTGGGGACCGGCTCCGACCATCGCCGCGAAGCGTTCCGCCACCACCACCAAAACTGATACACCTATCGAAAAAACGCCACAGTCGGTTTCGGTGGTCACTAACGAAGAGATGCAGATGCATCAATTCCAGTCAGTAAAAGAAGCGTTGGGTTACACGCCGGGTGTAACGGTAAGCAGCCGCGGCGCTTCCAATACCTATGACTTCGTGATTATCCGTGGCTTCTCTTCCGTCGGCCTG…	ATG	TAA
SL1344_3339	ATGGAACGATTAAAACGAATGTCGGTATTCGCCAAAGTTGTCGAGTTTGGCTCTTTTACCGCCGCAGCCAGACAGCTGCAAATGAGCGTATCGTCCATCAGCCAGACTGTGGCGAAACTGGAAGATGAGCTTCAGGTTAAATTGCTCAACCGCAGCACACGCAGCATTGGGCTCACCGAAGCTGGAAAAATCTATTATCAGGGCTGTCGTCGTATGCTGCATGAAGTGCAGGATGTTCACGAGCAGCTTTACGCTTTTAATAACACGCCTATCGGTACATTGCGTATCGGCTGTTCTTCAACCATGGCGCAAAATGTGCTGGCCGGGCTTACCGCAAAATTATTAAAAGAGTATCCCGGTCTGGCGGTCAATCTGGTGACAGGAATTCCGGCCCCGGAT…	ATG	TAA
SL1344_2551	ATGATTAAATTAATTCTTTCAGCACCCGTGCCAGCAATGGCCGTGGCTTTTGAACATTCTTTTCAGAATACCGAAAATGTGGAAATTATCCCCGGACCGTTTGAAACCATACCGGAATTTGACTGCATGGTCAGTGCGGCCAACAGCTTTGGTCTTATGGATGGTGGTGTGGATGCTGCTATTACGGCATATTTCGGGCCGCAATTACAGGAACGGGTACAGCAACATATCCTCCGTGAATATCTGGGAGAACAGCCCGTCGGCACCGCCTTTGTTATTGAAACGGGTAACAGTAAATATCCGTGGCTGGTTCACGCCCCGACGATGCGCGTTCCGCTGATAATCGACGGCACCGACGCGGTTTATAATGCAACACGTGCAGCGTTATTAGCGATATTT…	ATG	TAA
phoP	ATGATGCGCGTACTGGTTGTAGAGGATAATGCATTATTACGCCACCACCTGAAGGTTCAGCTCCAGGATTCAGGTCACCAGGTCGATGCCGCAGAAGATGCCAGGGAAGCTGATTACTACCTTAATGAACACCTTCCGGATATCGCTATTGTCGATTTAGGTCTGCCGGATGAAGACGGCCTTTCCTTAATACGCCGCTGGCGCAGCAGTGATGTTTCACTGCCGGTTCTGGTGTTAACCGCGCGCGAAGGCTGGCAGGATAAAGTCGAGGTTCTCAGCTCCGGGGCCGATGACTACGTGACGAAGCCATTCCACATCGAAGAGGTAATGGCGCGTATGCAGGCGTTAATGCGCCGTAATAGCGGTCTGGCCTCCCAGGTGATCAACATCCCGCCGTTC…	ATG	TAA
SL1344_2432	ATGAAACGTATTGCTTTTGTCGGCGCGGTCGGTGCCGGAAAAACAACGCTTTTTAACGCGTTACGGGGAAATTATTCCCTCGCCAGAAAAACGCAGGCCGTGGAATTTAATGATCATGGCGATATCGATACGCCGGGTGAATATTTTAGCCATCCCCGTTGGTATCACGCCTTAATTACCACGTTGCAGGATGTGGACACGCTGATTTATGTCCACGCGGCAAACGATAAAGAAAGTCGCTTACCTGCCGGGTTATTGGATGTTGGAACCCGTAAACGACATATCGCCGTTATCAGCAAAACGGACATGCCGGATGCCGACGTCGCCGCTACGCGGCAGTTGCTTTGCGAGATTGGATTCCGGGAGCCGATTTTCGAGCTCAACGGCCACGACCCGCAA…	ATG	TAA
mtlA	ATGTCATCCGATATTAAGATCAAAGTGCAAAGCTTTGGTCGATTCCTCAGCAATATGGTGATGCCTAATATCGGCGCGTTTATCGCGTGGGGTATTATCACCGCATTATTTATTCCAACAGGGTGGTTGCCTAACGAAACGCTGGCGAAACTGGTTGGTCCGATGATCACCTACCTGCTGCCGCTGCTCATCGGTTATACCGGCGGTCGTCTGGTTGGCGGCGAACGCGGCGGCGTAGTGGGCGCTATCACTACCATGGGCGTTATTGTCGGCGCGGATATGCCGATGTTCCTCGGCTCGATGATCGCCGGTCCATTAGGCGGCTACTGCATTAAGAAATTCGACAGTTGGGTAGACGGTAAGATCAAATCCGGTTTTGAGATGCTGGTGAACAACTTC…	ATG	TAA
glnE	ATGACGCCGCTCTCTTCACCCTTATCGCAGTACTGGCAGACCGTTGTTGAGCGCCTACCAGAAGGATTTACTGAGACATCGCTTAGCGTGCAGGCGAAGTCAGTACTTACATTTAGCGATTTTGCGCTGGATAGCGTGATAGCGCATCCGGAGTGGCTTGCCGAACTGGAATCCGCATCGCCGCAGGCTGATGAATGGCGACATTATGCTGGCTGGTTACAGGAGGCGTTGGCAGGTGTCTGTGACGACGCCTCGCTGATGCGTGAACTGAGGTTTTTTCGTCGTCGCATCATGGTACGCATCGCCTGGGCACAGACGCTGTCGCTGGTGGACGATGAGACTATTTTACAACAGTTGAGCCATCTGGCGGAGACGCTCATTGTGGGGGCGCGCGACTGG…	ATG	TGA
SL1344_1873	ATGATGATGCAAAAGAAAACCTGGGCCGTTTTATTGATACCATTGTGCCTCACCGCTTGCCACCAGACGACCTACCGATCAACAGCCAAAGATGAAATTTTCACAGGGAGCTATATTGACCCGACAAAAACACGCTTTCCGTTAGCGGATTATTCACAGTCGGTTGATAAATGGATACCTCCGGACTCGGCTGATTACACTATTCCGGTTATTGATAATGCTACCCAACAACGCTACTTTAACGCACTAAAATCTCATTATTTCGGAATGGACAGTGAAGCGCACTCGCCGTGGAATGGTTTTTATATTACCGCATTGCTGAAAAAAAACGCAGCACAGGCGCGGGATGCCAGTATTAAGCAGTTTCTTAGCGACGGCAGTGCTTATTGGGGGGAAAAC…	ATG	TAG
SL1344_1001	ATGAATTCTCTGTTTGCCAGTACGGCCCGCGGGCTGGAAGAGCTGTTAAAAACTGAACTGGAAAAACTGGGCGCCGTAGGGTGTCAGGTTGTTCAGGGTGGGGTCCATTTTCAGGGCGACACGCGGCTTATTTACCAGAGCCTGATGTGGAGCCGCCTGGCCTCGCGTATTATCCTGCCGATGGGTGAGTGCAAGGTCTACAGCGATCTCGATCTTTACCTCGGCGTTCAGGCGATAAACTGGACAGAGATTTTTAATCCTGGCGCGACGTTTGCGGTGCATTTCAGCGGCCTGAACGACACCATCCGTAATAGTCAGTATGGCGCGATGAAAGTTAAAGACGCGATTGTCGATGCGTTTACGCGGAAAAATCTTCCGCGTCCAAATGTGGACCGCGAA…	ATG	TGA
ysgA	ATGACAACGACACATCCATCCGGCTTTGCACCTGCAGCCTCCCCACTTGCCCCTACGATGATTCATACGCCTGATGGGGCCATTAGCGCGGGGATAACGTCGATTCCCTCTCAGGGCGACGATATGCCCGCCTATTACGCCAGACCAAAAGCGAGCGACGGCGCGCTGCCGGTGGTCATTGTGGTACAGGAAATTTTTGGCGTACATGAACACATTCGCGATATTTGCCGACGACTGGCGCTGGAAGGCTATCTCGCTATCGCGCCGGAGCTCTATTTCCGCGAAGGCGACCCCAATGATTTCGCCGATATACCCACATTATTGAGCGGGCTGGTGGCTAAAGTACCCGATTCGCAAGTCCTTGCCGACCTGGATCACGTCGCCAGTTGGGCTTCGCGC…	ATG	TAA
rplY	ATGTTTACTATCAACGCAGAAGTACGTAAAGAGCAGGGTAAGGGTGCGAGCCGCCGCCTGCGCGCCGCTAACAAGTTCCCGGCAATCATCTACGGCGGTTCTGAAGCCCCGATTGCTATCGAACTGGACCACGACCAGGTGATGAACATGCAAGCTAAAGCTGAATTCTACAGCGAAGTTCTGACCCTCGTTGTTGACGGTAAAGAAGTAAAAGTTAAAGCTCAGGCTGTACAGCGTCACGCTTACAAACCGAAGCTGACTCACATCGACTTCGTTCGCGCGTAA	ATG	TAA
ybeJ	ATGATAAAGGAGTTGGATATGCAATTACGTAAGCTAACCACAGCAATGCTGGTCATGGGACTGTCTGCGGGCCTTGCGCACGCAGAAGATGGCGCGCCTGCCGCTGGTAGCACCCTGGACAAGATCGCTAAAAATGGCGTGATCGTCGTCGGGCATCGCGAATCTTCTGTGCCCTTTTCTTATTACGACAACCAGCAGAAAGTGGTCGGCTATTCCCAGGACTACTCCAACGCCATTGTGGAAGCGGTAAAAAAGAAACTTAACAAGCCCGATCTGCAGGTGAAGCTGATCCCGATCACCTCGCAAAACCGTATTCCACTATTGCAAAACGGAACCTTCGATTTTGAATGTGGTTCAACGACTAACAACCTTGAGCGCCAGAAACAGGCCGCCTTCTCC…	ATG	TAA
rumA	ATGGCGCAATTCTACTCTGCAAAACGGCGCGTGACGACGCGTCAGATCATAACCGTTAAAGTCAATGACCTCGATTCATTTGGTCAGGGCGTAGCCCGTCATAACGGAAAAGCGCTGTTTATCCCCGGTTTATTGCCTGAGGAAAGCGCAGAAGTCATTATTACAGAAGATAAAAAGCAATTTGCCCGCGCACGCGTTTCGCGCCGTTTGAATGATAGCCCGGAACGAGAAACGCCGCGCTGCCCGCATTTTGGCGTCTGCGGCGGTTGTCAGCAACAGCATGTCAGCATCGCCCTGCAACAACGCAGCAAAAGCGCGGCGCTGGCGCGTTTGATGAAACACGAGGTGAATGACATCATCGCCGGCGCGCCTTGGGGTTATCGGCGTCGTGCGCGGTTA…	ATG	TAA
amiB	ATGATTTATCGCATCAAAAATGCCGTAATAGCAGCCTTAATCCTGCTGTGCGCGCAGGCGGGCGCCGCCAGTCTCTCTGATATTCAGGTGTCCAACGGCGAGCAGCAGGCGCGCATTACGCTGAGTTTTATCGGCGAGCCGGAATATGCTTACTCACAGGACGGTAAACGGACTGTGGCGCTGGATATCAGGCAGACCGGCGTGATTCAGGGGCTGCCGCTTCAGTTTAGCGGTAACAATCTGGTAAAAACGATCCGTGCTGGAACGCCGAAAGATGCGCAATCTTTACGGTTGCTTGTCGATCTGACGGAAAATGGTAAAACCGAGGCGGTGAAGCGGCAAAACGGCGGCAACTATACGGTCATTTTCACCATTAATGCCGATGTTCCGCCGCCACCG…	ATG	TAA
stjA	ATGAAATCCAACAGCAAATGGTTGGGGATTGCTATATGTTGTATCTTCACCGCACTACTCCCCCCATCAGCCCGGGCCGACGATGACTGCCAAATAACGTTTTCTTCGCCAAACGTCAGCTTTGGCTGGCTTAAGCAAGATGATATCGTCAATTCTCAGCAAGGCTGGAATCAAATGTCTTCACAGGAGGTTCACGTTAGTGTGAGTTGCCCAGAAAGCCAGAATATTGCTCTTTTTGTGCAGGCCTCAGCGGGGGAAAAGGGACGATTTTATTTTGGAAATAACGGTGGTCTCGCCGTACGTGTTAGTCAGATGATAGTAGATGGTAAAAGTTATCCTATTGCCAGCACCCTTGATAGAGTGAGCTTTGCTCCCAATGACAGTGCCCTGGATAGTCTG…	ATG	TAA
sapF	ATGGTGGAAACTCTGCTTGAAGTGCGCAACCTGAGTAAAACCTTTCGCTACCGGACAGGATGGTTTCGTCGCCAGACCGTCGACGCCGTGAAACCATTAAGCTTTACGCTTCGTGAGCGTCAGACCCTGGCCATTATCGGCGAAAACGGTTCCGGCAAATCCACGCTGGCGAAGATGCTGGCCGGCATGATTGAACCCACCAGCGGCGAGCTTCTTATTGACGATCATCCCCTGCATTACGGCGACTATTCGTTTCGAAGCCAACGTATTCGAATGATTTTTCAGGACCCCTCAACGTCACTGAATCCACGTCAACGTATTTCGCAGATCCTTGACTTCCCCCTGCGCCTTAATACCGATCTGGAGCCGGAACAGCGGCGCAAACAGATTGTCGAGACG…	ATG	TAA
fixA	ATGAAGATAATTACTTGCTACAAATGCGTACCTGATGAGCAGGATATTGCGATTAATAATGCTGACGGAACACTCGATTTCAGCAAAGCGGATAGCAAAATCAGCCAATATGATCTGAATGCAATTGAAGCTGCTTGCCAGTTAAAACAGCAGTTGGGAGACGCTCAGGTTGTCGCCATGAGCGTTGGCGGCAAAGCGCTGACTAATGCAAAAGGGCGCAAAGATGTCCTCTCTCGTGGCCCTGATGAACTGATTGTGGTCATTGACGATCAATTTGAGCAGGCGCTGCCGCAACACACCGCTACCGCGCTGGCCGCCGCCGCGCAAAAATCAGGTTTCGATCTACTTATCTGCGGCGACGGTTCTTCCGATCTTTATGCTCAGCAGGTTGGTTTGCTG…	ATG	TAA
SL1344_0413	ATGGCATGTGGCGAGTTTTCCCTGATTGCCCGTTATTTTGACCGTGTAAGAAGCTCTCGTCTTGATGTTGAAACCGGTATTGGCGACGATTGCGCGCTCCTGAATATTCCTGAAAAGCAGACCCTGGCGATCAGTACCGATACGCTGGTGGCGGGCAACCACTTCCTCCCTGATATCGATCCTGCCGATCTGGCTTATAAAGCGTTGGCGGTGAATTTAAGCGATCTGGCCGCGATGGGGGCCGACCCGGCCTGGTTAACGCTGGCGTTAACGCTACCGGAAGTGGATGAGCCGTGGCTGGAGGCTTTTAGCGACAGCCTGTTTGCGCTATTGAATTACTACGATATGCAGCTCATTGGCGGCGACACCACGCGTGGACCGCTGTCGATGACGCTGGGT…	ATG	TAA
nth	ATGAACAAAGCAAAAAGGCTGGAAATTCTGACGCGCCTGCGCGACAACAATCCGCACCCCACAACGGAACTCAATTTCACGTCGCCGTTTGAGTTGCTGATTGCCGTGTTGCTTTCCGCGCAGGCAACCGACGTCAGCGTGAACAAGGCTACCGCCAAACTTTACCCGGTCGCCAATACGCCAGCCGCGATGCTGGAGCTGGGCGTAGAGGGCGTGAAATCCTATATCAAAACTATCGGCTTATTTAACAGTAAAGCGGAAAACGTGATTAAGACCTGCCATATTTTACTGGACAAGCATAATGGCGAAGTGCCGGAGGATCGGGCGGCGCTGGAAGCGCTTCCCGGCGTGGGGCGTAAAACCGCTAACGTGGTGCTAAATACCGCCTTCGGCTGGCCG…	ATG	TGA
SL1344_2550	ATGACGTTTAAAATGAGCGATACCCCGCAGACAATTAAAATTTTTAATCTGCGTTCAGATACAAACGAATTTATTGGTGCAGGTGATGCATATATCCCGCCACACACTGGATTACCGGCAAATTGTACGGATATTGCGCCCCCGGATATTCCAGCCAGTCATATTGCGATATTTGATGCTGAAACCGGAACGTGGAGTCTGCATGAGGACCACCGCGGCGAGACGGTTTACGACACAACAACCGGCAATCAGGTTTATATTTCCGCTCCCGGCCCGCTACCTGAAAATGTCACATCAGTTTCACCAGACGGTGAATACCAGAAATGGGATGGTAAGGCGTGGGTGAAGGATGAAGCTGCGGAAACAGCGGCCAGACTTCGTGAAGCTGAAGGGACCAAA…	ATG	TAA
SL1344_2431	GTGAAAAAACTTATCACAGCTAACGATATTCGTGCGGCCCACGCCCGCGGCGAACAGGCGATGTCGGTAGTGCTGCGCGCCAGCATTATTACCCCGGAGGCTCGCGAAGTGGCGGAACTACTGGGCTTCACGATTACCGAATGCGACGAGTCCGTTCCGGCATCCACATCGGCGCAGGCGTGTAAAAGCGAAAGCCAGCGCATTCGGGAAGCCATCATCGCGCAGCTCCCGGAAGGGCAGTTTACTGAAAGCCTGGTGGCGCAGTTGATGGAAAAAGTGCTGAAGGAAAAGCAGTCGCTGGAACTGGGGACGATGCAGCCGAGCTTTACCTCCGTCACGGGTAAAGGCGGCGTGAAAGTCATTGACGGCAGCAGCGTGAAATTTGGCCGCTTCGACGGC…	GTG	TGA
SL1344_4452	ATGGAATTTTACGAGAACCGCCCCAGACAACCATTCATTGGCTTTGTGCAGCTCAGACGGGCGCTAAAAAGGTGGTGGCTGCGTAAGCGGGCCTGTCAGGCGCTGCGACGAATGAGTGACGAGCAGTTAAGGGATATCGGGTTGGAAAGGAAGGATGTGGAATAG	ATG	TAG
SL1344_1985	TTGTGCCGCGGCTTCATCACCATCGCCGGAGACCTGTCGCCGATAATCGCGTCTACGTCAGGAAACGCGCCGGAAGGCGAAAACATTGCGCCGCACTTCACGCTCCTTGAGCGCCTGGACCCACAAGCCCGGATTAACAAGCAGATACCGACCGTGAGAATCGATCAGCTTAAAGGGATTATCAGAAGGCTTGATACTGAGGATTTTCGCGTCGGACAGGGATATAGGGTGGTCACGCCATTATCGAACTCATAG	TTG	TAG
SL1344_2717	ATGATGCGCTGCCCTTTCTGCCGCACGGCGGCTCACGTCCGCACCAGCCGCTATATGTCTGAGAGCGTCAAAGAAAGTTACCTGCAGTGTCAGAATGTGCACTGCTCGGCGACATTCAAAACGCATGAGTCCATCTTTGAAGTGATACGTTCGCCGGTCGTCGATGAGAAACCCGCGCCGGTACCAACAGCCCCTGCACCCCGTCGGGTAAAAGGCTGCTACAGCTCGCCGTTCCGCCATTAA	ATG	TAA
SL1344_3649	ATGAAACTCATCGGTAGCTACACCAGCCCTTTTGTGCGCAAAATCTCTGTTCTGCTGCTCGAAAAGGGTATTACCTTCGAATTTATTAATGAACTACCTTACGAGGCGGATAACGGCGTGGCGCAATACAACCCTCTGGGTAAGGTGCCAGCGCTGGTGACGGAGAAAGGGGAGTACTGGTTCGATTCGCCGATCATCGCGGAATATATTGAACTGCTGGATATCGCGCCAGCGATGCTCCCGCGTGACCCGATGGCAGCGCTTAAAGTTCGCCAGCTTGAAGCGTTGGCTGACGGCATTATGGATGCAGCGTTGGTGTCTGTACGCGAACAGGCGCGCCCGACGGCGCAACAATCGGAAACGGAACTGCTGCGCCAGCGGGAAAAAATCAACCGCAGC…	ATG	TGA
rfaE	ATGAAAGTAAATCTGCCAGCGTTTGAACGTGCAGGCGTCATGGTTGTGGGTGATGTAATGCTGGATCGCTATTGGTATGGCCCCACTTGCCGTATTTCACCGGAAGCGCCGGTGCCCGTGGTTAAGGTAAATACCGTTGAGGAACGCCCGGGCGGCGCGGCGAACGTGGCGATGAACATTGCGTCTCTGGGAGCGAACGCCCGTCTGGTCGGCCTGACGGGTATTGATGACGCCGCGCGCGCGCTGAGCAAAACGCTGGCGGAGGTCAATGTGAAGTGCGACTTCGTTTCTGTGCCGACGCATCCGACGATTACCAAACTGCGCGTACTATCACGTAATCAGCAGCTCATTCGTCTTGATTTTGAAGAAGGCTTTGAGGGCGTGGACCCGCAGCCGTTG…	ATG	TAA
SL1344_1872	TTGCATTTTAATAACGGTGCCCGGTCAGAGCGCGATCTTGGGGATCTGGTCACTAAAGTTTTTGAGAAAGCGGCGAAAAAAGAACCGCAACCGCTATACACATTTAGCCTGCCGTTGCTGAGTGTGCAGGATGAGATCCGTGTTTACTGTAAGAAAAAAAATATCAAAATAGGGTACGATACGCTGTTTATGGAAATAACCTTTTCTGCTGACAGAGAAGCGGTAGACGAACTCATTAAACACTTTTTTACTGAAAATAAGCTCTATTTGAGAGGGCGGTTTTATCTGTCCGCGGCGGTGGTATAA	TTG	TAA
SL1344_1000	GTGGCGACGTTATCACGGCTCTTTATTCATCCGGTCAAATCCATGCGCGGCATTGGCCTGACTCATGCGCTGGCAGATATCAGCGGCCTGGCTTTTGATCGCATCTTCATGGTGACCGAGCCTGACGGCACATTTATTACCGCCCGCCAGTTTCCACAAATGGTACGTTTTACCCCCTCTCCCTTACACGACGGCCTTCATTTGACCGCGCCAGACGGCAGTAGCGCGCTGGTTCGCTTTACGGATTTCACCCCGCAGGATGCGCCGACCGAGGTCTGGGGAAACCATTTTACCGCTCGCGTCGCCCCGACGGCGATTAATCAATGGTTGAGCGGCTTTTTCTCCCGCGATGTCCAGTTGCGCTGGGTTGGGCCGCAGTTGACACGCCGGGTCAAACGA…	GTG	TAA
SL1344_3920	TTGTCTCATGGCGCTGGTGAACCTTATTTTTTAACGGAGATGTCTGACATGGCGGTAGCAGGTTGTCACGTAATGGCCAAACCCGGCGGCGCGATCTGCAATATTGATTGCACATATTGCTTCTATCTTGAAAAAGAGGCGCTGTACCCGGAACGCAATAAAAACTGGCGGATGTCGGACGAGACGCTGGAACAATTTATACGCCAGCATATTGCCGCGCAGAGTGGCGACCGCATTGACTTTGCCTGGCAGGGCGGCGAACCGACCATGATGGGGCTACCGTTTTTCCGTCGGGTTGTCGCATTATGTGAAAAGTACGGCGATGGGCGAAAAATCACTCATGCGTTGCAGACGAACGGCATCCTGGTGAATGACGAGTGGGCGCGCTTTTTCGCTGAA…	TTG	TAG
yejH	ATGATTTTTACACTCCGCCCCTACCAGCAAGAAGCCGTAGACGCCACGCTCAGCCACTTTCGCCGCCACCGTACGCCCGCCGTGATTGTTCTGCCGACCGGCGCAGGTAAAAGCCTGGTGATCGCCGAACTGGCGCGCGTCGCCCGCGGACGGGTACTGGTGCTGGCGCATGTGAAAGAGCTGGTCGCGCAGAACCACGCCAAATATTGCGCGCTGGGGCTGGAAGCGGATATTTTCGCCGCCGGACTCAAACGTAAAGAGAGTCAGGGCAAAGTCGTGTTCGGCAGCGTACAGTCGGTGGCGCGTAATCTTGACGCCTTCCAGGAGGAGTTTTCGCTGTTGATTGTCGATGAATGCCACCGCATCGGTGACGATGAAGACAGTCAGTATCAGCAAATC…	ATG	TAA
gltJ	ATGTCAATAGACTGGAACTGGGGTATTTTTTTACAGGAAGCCCCCTTCGGCAATACCACCTATCTCGGCTGGCTATGGAGTGGTTTTCAGGTCACCGTCGCCCTTTCGATTACCGCCTGGATTATCGCTTTCCTGGTAGGATCTATTTTCGGCATTTTACGTACCGTTCCCAACCGTTTCCTCTCCGGACTGGGCACGTTGTACGTAGAACTGTTCCGTAATGTGCCGCTGATCGTGCAATTCTTCACCTGGTACCTGGTGGTGCCTGAACTGTTGCCGGAAGATCTTGGCATGTGGTTTAAGGCGGAACTCGATCCCAATATTCAGTTTTTCCTCTCCTCAATGATCTGTCTGGGACTGTTTACCGCCGCCCGCGTTTGCGAACAGGTGCGCGCCGCG…	ATG	TAA
relA	ATGGTCGCGGTAAGAAGTGCACATATTAATAAAGCTGGTGAATTTGATCCGAAGAAGTGGATCGCAAGCCTGGGAATTTCCAGCCAGCAGTCGTGTGAGCGCTTAGCCGAAACCTGGGCGTATTGCCTGCAACAGACACAAGGACATCCGGATGCGGATCTGTTGCTGTGGCGTGGCGTGGAGATGGTAGAAATTCTTTCCACGCTGAGTATGGATATCGACACGCTGCGGGCGGCGCTACTGTTCCCTCTGGCCGACGCCAACGTAGTCAGCGAAGATGTACTGCGCGAAAGCGTCGGCAAATCTATCGTTACCCTGATTCATGGCGTGCGCGATATGGCGGCGATCCGTCAGCTAAACGCCACTCATAACGACTCTGTTTCTTCGGAGCAGGTTGAT…	ATG	TAA
SL1344_4291	ATGATGAATCGAGTAATTCCGCTACCTGACGAACAGGCGACGCTAGACCTGGGGCAACGGGTAGCCAACGCCTGCGATGGCGCGACCGTTATTTATCTGTATGGCGATTTAGGTGCCGGTAAAACGACGTTTAGCCGGGGATTTTTACAGGCGTTAGGCCATAACGGTAATGTAAAAAGCCCCACCTATACGCTGGTAGAGCCTTATGCGATTGATAACATGATGGTATATCACTTCGACTTATACCGTCTTGCGGACCCGGAGGAGCTGGAGTTTATGGGCATTCGCGATTATTTCGCCAACGACGCCATTTGTCTGGTTGAGTGGCCGCAACAAGGTAAAGGCGTTCTCCCCGACCCGGACGTCGAAATCCATATTGATTACCAGGCGCAGGGGCGT…	ATG	TAG
SL1344_4136	ATGGATAAACTGCTTCTGCCGCCGCCGCTGGCCAGCGACGAACGTTTCTCAATTCTGGCGAACATTGCCGCCGAACGTTTCGCGCAAATCGACCTGACGGCGTTGCTGGTCTATCTGGTGGATATCGTTGATGCCTCGGCATTGCCCTCGTTGGCCGAACAGTTTCATGTACAGGGGCTCGAAGGCTGGCTATTTGCTGCCAATGAACAGGAGAAACGAGAGTTAATTAAGCAGGCGATTGAACTGCATAAATATAAAGGAACCCCCTGGGCCGTTCGCCGCGTACTGGAAATATTATCCTTACCCGGCACGATTTCCGAATGGTTTGAGTATGGCGGTAAGGCTTATTTCTTCAAGGTTGAAATTAAGCTAATCAACCAGGGCATGGATGAAAATCTG…	ATG	TAA
sapD	ATGCCGTTACTGGATATCCGCAATCTCACCATTGAATTTAAAACCAGCGAAGGTTGGGTAAAAGCGGTCGATCGCGTCAGTATGACATTAAGCGAAGGTGAAATTCGCGGCCTGGTAGGTGAATCGGGTTCCGGAAAGAGCTTGATTGCTAAAGCTATTTGCGGCGTCGCGAAAGACAACTGGCGAGTCACTGCCGACCGTATGCGTTTTGATGATATCGATCTGCTGCGCCTCTCCTCACGTGAACGGCGTAAGCTGGTCGGACATAATGTGTCGATGATCTTCCAGGAGCCGCAGTCGTGCCTTGATCCTTCCGAACGCGTCGGCCGCCAGTTAATGCAAAATATTCCCGCCTGGACCTATAAAGGCCGCTGGTGGCAGCGTTTAGGCTGGCGTAAA…	ATG	TGA
caiT	ATGAAAAATGAAAAGAAAAAATCGGGAATTGAACCGAAGGTTTTTTTTCCGCCATTAATAATTGTCGGGATACTTTGCTGGCTAACAGTCAGAGATCTTGATGCCGCTAACGTCGTTATTAATGCGGTATTCAGTTATGTCACCAACGTCTGGGGTTGGGCATTTGAATGGTATATGGTCGTCATGCTCTTCGGCTGGTTCTGGCTGGTTTTTGGCCCCTATGCCAAAAAGAGATTAGGTGACGAAAAACCGGAGTTTAGCACCGCCAGCTGGATTTTCATGATGTTCGCCTCCTGTACATCCGCTGCGGTTCTGTTCTGGGGCTCTATTGAGATCTACTACTATATCTCCACCCCGCCGTTCGGCCTGGAACCAAATTCCACGGGCGCGAAAGAGATA…	ATG	TAA
SL1344_3543	ATGAGCGATCTGTTTTCCTCCCCTGACCATACGCTTGACGCCCTGGGGCTGCGTTGCCCTGAACCGGTAATGATGGTGCGCAAAACGGTGCGCAACATGCAAACTGGCGAAACATTGCTGATTATCGCCGACGATCCGGCGACGACGCGTGATATTCCGGGGTTCTGTACCTTTATGGAACACGATTTGCTGGCGCAAGAGACGGAGGGTCTGCCGTACCGTTATTTATTGCGTAAAGCGCATTAA	ATG	TAA
nusB	GTGAAACCTGCTGCTCGTCGCCGCGCCCGTGAGTGTGCCGTCCAGGCGCTTTACTCCTGGCAGTTGTCCCAGAACGACATCGCTGATGTTGAATACCAGTTCCTGGCGGAACAGGACGTAAAAGACGTCGACGTTCTCTATTTCCGTGAACTGCTATCCGGGGTGGCGACTAACAGCGCGTACCTGGATGGTTTAATGAAACCGTATCTGTCCCGCCTGCTTGAAGAGCTGGGACAGGTTGAAAAAGCCGTGCTGCGTATTGCGTTGTTTGAGCTGTCAAAACGCAGCGATGTGCCTTATAAAGTGGCCATCAACGAAGCGATTGAACTGGCGAAAACCTTTGGCGCTGAAGACAGCCACAAATTCGTCAACGGCGTACTGGATAAAGCAGCTCCGGTG…	GTG	TGA
repY	ATGAAACCGTACCAGAGATTCAACCCTGTGCAGTGTATAAATACACGGCACAATCGCTCCGCCATAAGCGACAGCTTGTGGCAGGTCTGA	ATG	TGA
SL1344_1384	GTGTCTACTGCAAACAAAAAACCAACTGAAAGCGTCAGTTTGAACGCTTTCAAACAACCGAAGGCGTTCTATCTCATCTTCTCGATAGAGTTATGGGAGCGTTTTGGTTATTACGGCCTGCAAGGCATTATGGCCGTCTACCTGGTAAAACAACTGGGTATGTCAGAAGCGGATTCCATCACCCTTTTCTCTTCCTTCAGTGCACTGGTGTACGGCCTGGTCGCCATTGGCGGTTGGTTAGGTGATAAAATTCTGGGCACCAAACGCGTTATTATGCTGGGTGCCGTGGTGCTGGCTATCGGTTATGCGCTGGTCGCATGGTCTGGTCATGACGCTGGCATCGTCTATATGGGCATGGCGGCTATCGCTGTGGGTAACGGTCTGTTTAAAGCTAACCCG…	GTG	TAA
mrcB	ATGGCGGGGAATGACCGCGAGCCGATTGGACGTAAGGGGAAACCGTCACGTCCTGTGAAACAAAAGGTGAGCCGTCGTCGGCAGCATGACGACGATTATGATGATGACTATGAGGATGAAGAACCGATGCCGCGTAAAGGTAAGGGCAAAGGGCGTAAGCCTCGTGGCAAGCGCGGCTGGCTGTGGCTATTGCTAAAACTGTTTATCGTTTTTGTGGTGCTGTTCGCCATTTACGGCGTCTATCTGGATCAAAAAATCCGCAGCCGTATCGATGGCAAGGTCTGGCAGCTTCCGGCGGCGGTATATGGCCGGATGGTGAACCTTGAGCCAGACATGCCTGTCAGCAAAAACGAGATGGTGAAATTGCTGGAAGCGACGCAGTATCGTCTGGTGACGAAG…	ATG	TAA
SL1344_3338	ATGAGTCTGTTTCCCGTTATCGTGGTGTTTGGTCTTTCCTTCCCACCGATATTTTTCGAATTGCTTTTGTCACTGGCTATTTTTTGGCTGGTGCGTCGGATGCTTGTGCCGACGGGCATCTATGATTTTGTCTGGCATCCGGCTCTGTTCAATACCGCGCTGTATTGTTGTCTGTTTTATTTAATATCGCGCCTGTTCGTTTGA	ATG	TGA
SL1344_2549	GTGCCAAAATTTAACAGGCAACGTATTATTAAACACGTTAAGAGCGTATTTTTAGCAATGATTTTAATATTACCATCTTCACTATATTCTGCTCTTACAATAGCGGCAGACTCTCAAGATCATAAAAAAGAAGAAACAATTAAGCCAATGCCTCAAAAGTGGTGTAATCTTTGGCCTGCTGGCATACCCTTCCCTGAAGATTGGTTTAAAATGTGTAGAGGTTATTGA	GTG	TGA
phoQ	ATGAATAAATTTGCTCGCCATTTTCTGCCGCTGTCGCTGCGGGTTCGTTTTTTGCTGGCGACAGCCGGCGTCGTGCTGGTGCTTTCTTTGGCATATGGCATAGTGGCGCTGGTCGGCTATAGCGTAAGTTTTGATAAAACCACCTTTCGTTTGCTGCGCGGCGAAAGCAACCTGTTTTATACCCTCGCCAAATGGGAAAATAATAAAATCAGCGTTGAGCTGCCTGAAAATCTGGACATGCAAAGCCCGACCATGACGCTGATTTACGATGAAACGGGCAAATTATTATGGACGCAGCGCAACATTCCCTGGCTGATTAAAAGCATTCAACCGGAATGGTTAAAAACGAACGGCTTCCATGAAATTGAAACCAACGTAGACGCCACCAGCACGCTGTTG…	ATG	TAA
gntT	ATGATCCGCTTCAAAATGAACGGATTTATCGCCCTTGTCCTGGTAGCGCTCGCTGTCGGGTTGATGCAGGGAATGCCTCTGGATAAAGTCATCGGCTCCATCAAAGCCGGTGTCGGTGGTACGCTTGGCAGTCTGGCCCTGATTATGGGGTTCGGCGCCATGCTGGGCAAAATGCTTGCCGACTGCGGCGGCGCTCAACGTATCGCCACTACCCTGATCGCGAAATTTGGTAAAAAGCATATTCAGTGGGCCGTAGTGTTAACCGGCTTTACCGTCGGCTTCGCTCTGTTCTATGAAGTGGGCTTCGTTCTGATGCTGCCGCTGGTATTCACCATTGCCGCAGCGGCGAATATCCCGTTACTGTACGTCGGCGTGCCGATGGCCGCGGCGCTCTCCGTC…	ATG	TAA
SL1344_2430	ATGAACGATTTCATCACCGAAACGTGGCTCAGAGCGAATCATACGCTCAGCGAAGGATCGGAGATCCATCTGCCCGCTGACGCACGACTGACGCCCTCGGCCCGGGAACTGCTGGAAAGTCGCCGTCTGCGCATTAAGTTTCTGGATCCGCAAGGCCGGCTGTTTGTCGATGATGACGAACAGCAGCCGCAGCCGGTACATGGCTTAACCAGTAGCGATACGCACCCACAGGCCTGCTGTGAACTGTGCCGCCAGCCGGTGGTGAAAAAGCCCGATACGCTGACCCATCTGACGGCGGACAAAATGGTCGCCAAAAGCGACCCGCGCCTCGGCTTTCGCGCCGCGCTCGACAGCGCCATCGCGCTGACCGTGTGGCTACAAATCGAACTGGCGGAACCC…	ATG	TGA
selA	ATGACAAGCGAAACGCGTACACTCTACAGCCAGCTTCCTGCTATCGATCGTTTATTGCACGATAGCGCCTTTCTTTCTCTGCGCGATCGGTATGGCCATACCCAGGTGGTTGATCTGCTTAGGCGGATGTTTGACGACGCGCGCGACGTCATCCGGAATACGCAAACGCTTCCCGACTGGTACGCAGACTGGGCGCAAGAGGCGAAACTCCGGCTGGAAAATGCGGCGCAAAGCGCGCTGCGCCCGGTGATTAACCTGACGGGGACGGTGTTGCACACCAATCTTGGCCGCGCATTGCAGGCGCAAGAAGCGATTGAGGCGGTAACGCAGGCGATGCGCGCGCCGGTGACGCTGGAATACGATTTGGATGGCGCCGGGCGGGGGCATCGCGACCGGGCA…	ATG	TGA
SL1344_3172	ATGGATGATGTTTTTGGCATATTGCCATCATGGATGTTTACCGCCATCGTTGCGGTTATCGTCTTACTAATTATCGGGATCATTTTTGCTCGCCTCTATCGCCGCGCATCTGCGGAACAGGCATTTGTCCGTACCGGGCTTGGCGGGCAAAAAGTGGTGATGAGCGGCGGCGCTATTGTGATGCCAATCTTTCACGAAATTATTCCGATCAATATGAATACCCTAAAACTTGAAGTCAGCCGTGCTACCGTCGACAGCCTGATCACCAAAGATCGTATGCGCGTTGACGTGGTCGTCGCTTTCTTCGTACGTGTAAAACCCTCTGTTGAAGGTATTGCCACCGCCGCACAAACGCTTGGCCAGCGAACGCTGTCGCCGGAAGATCTGCGTATGCTGGTT…	ATG	TAA
SL1344_1871	ATGAAAATGGAACCATTAAACGAGAACGAGCTGGAATGGCTGGATGATGTGCTGACGAAATACAATACCGATCAGGCCATTTTGGATGTCGCGGAGCTGGACGGTCTGATTACTGCGGTACTAAGTTCTCCGCGTCCCATCGACCCGGAACAGTGGCTGGTCGCGATATGGGGGGGACCCGCGTACGTACCGCGCTGGACATCTGAAAAAGAAATGACGCGATTTATGGATCTGGTGTTCCAGCACATGGCGGACACAGCCGCCCGGCTTGAAGACTATCCAGAACAGTTCGAGCCGCTGTTTGGCCTGCGAGAAGTTGATGGCCATGAATTAACGATTGTTGAAGAATGGTGCTTTGGTTACATGCGCGGAGTGTCGCTGTCCGACTGGTCTGACTTG…	ATG	TAA
metE	ATGACAATATTGACTCATACCCTTGGTTTTCCTCGCGTTGGCCTGCGTCGCGAGTTGAAAAAAGCGCAAGAGAGCTACTGGGCGGGGAACACAACGCGTGAAGCGTTACTGGCGGTGGGGCGCGAACTGCGCGCGCGTCACTGGGAGCAGCAGAAACAAGCGGGTATTGACCTGTTACCGGTAGGCGACTTTGCCTGGTACGACCATGTTCTGACCACCAGCCTGCTGTTAGGCAATGTGCCGGCTCGTCATCAGAACAACGACGGTTCCGTGGACATCGACACTCTGTTCCGCATTGGCCGCGGTCGCGCGCCAACCGGCGAACCGGCGGCGGCAGCGGAAATGACCAAATGGTTTAATACTAACTATCACTACATAGTACCGGAGTTCAGCAAAGGC…	ATG	TAA
SL1344_0999	ATGCGAATTAAACCTGACGATAACTGGCGCTGGTATTATGATGAAGAGCACGATCGTATGATGCTCGATCTCGCCAATGGTATGCTTTTTCGCTCGCGCTTCTCTCGTAAAATGCTTACGCCGGACGCGTTTTGCCCGACCGGTTTTTGTGTGGATGATGCCGCGCTCTATTTTTCCTTTGAAGAAAAATGCCGGGATTTCGAATTAACCAAAGAGCAACGCGCGGAGCTGGTATTGAATGCGCTGGTGGCGATTCGCTATCTCAAACCGCAGATGCCGAAAAGCTGGCATTTTGTAGCGCATGGCGAAATGTGGACCCCGGGAACGGGCGATGCCGCAAGCGTCTGGTTAAGCGATACGGCGGAACAGGTTAATTTGCTGGTCGTTGAGCCGGGAGAA…	ATG	TAA
rplN	ATGATCCAAGAACAGACTATGCTGAACGTCGCCGACAACTCCGGTGCACGTCGCGTAATGTGTATCAAGGTTCTGGGTGGCTCGCACCGTCGCTACGCAGGCGTAGGCGACATCATTAAGATCACCATCAAAGAAGCGATTCCGCGTGGTAAGGTCAAAAAAGGTGATGTGCTGAAGGCGGTAGTGGTGCGCACCAAGAAGGGTGTTCGTCGCCCGGACGGTTCTGTCATTCGCTTCGATGGTAATGCATGCGTTATTTTAAACAATAACAGCGAGCAGCCTATCGGTACGCGTATTTTTGGGCCGGTAACTCGTGAACTTCGTAACGAGAAGTTCATGAAAATTATCTCTCTGGCACCAGAAGTACTCTAA	ATG	TAA
yejD	ATGCGACTTGATAAATTTATCGCTCAGCAGCTTGGCGTCAGCCGCGCTATTGCCGGGCGTGAAATTCGTGGTAACCGCGTTACCGTCGATGGCGACATCATTAAAAATGCGGCCTTCAAACTGCTCCCAGAACATGCGGTTGCGTATGACGGCAATCCCTTAGCGCAGCAACACGGGCCACGCTATTTTATGCTTAACAAGCCGCAGGGATACGTTTGTTCAACCGATGATCCCGATCATCCAACGGTGCTGTATTTCCTGGATGAGCCGGTGGCGTATAAGCTGCATGCCGCAGGACGTCTGGATATCGATACTACCGGTCTGGTGTTAATGACAGATGACGGTCAGTGGTCGCACCGCATTACGTCGCCGCGCCATCACTGTGAAAAAACCTATCTG…	ATG	TAA
gltK	ATGTACGAATTTGACTGGAGTTCGATTATCCCCTCACTGCCTTACCTACTGGCCGGGTTGGTCATCACGCTGAAGATCACCGTCACCGCCGTTATCGTGGGGATAGTCTGGGGAACCATTCTGGCCGTCATGCGCCTCTCAAGCTTTGCCCCTATCGCCTGGTTTGCTAAAGCGTATGTTAACGTTTTCCGTTCCATCCCGTTGGTGATGGTCTTGCTGTGGTTCTATCTGATTGTACCCGGCTTTCTGCAAAACGTGCTGGGACTATCGCCGAAAACCGATATCCGCCTGATCTCCGCGATGGTGGCATTCTCCATGTTTGAAGCGGCCTACTATTCCGAGATTATTCGCGCCGGTATTCAAAGTATTTCCCGCGGGCAGTCCAGCGCCGCGCTGGCG…	ATG	TAA
SL1344_2936	ATGACCGTTGATCTTGGCGATGAACTGCGCGAGTTTATTGAATCGCTCATAGAATCAGGTGATTACAGAACACAAAGTGAAGTGATCAGAGAGTCTCTTCGTCTGCTGAGGGAAAAACAGGCCGAGTCACGACTTCAGGCGTTACGTGAACTTCTGGCTGAAGGTCTGAACAGCGGAGAGCCGCAGGCCTGGGAAAAGGATGCCTTTTTACGGAAGGTCAAAACAGGGATGATCAAACCCGATGAGAATGGTAAAATTAACGCCAAAGGCCAGTGA	ATG	TGA
SL1344_4290	ATGATGGACCATAACATGAAGAAAAACCCTGTAAGTATACCACACTCCATTTGGCCCGCCGATGACATCAAACGGCTGGAACGCGATGCGGCGGATGCCTTCGGACTCACACTCTATGAATTGATGCTGCGCGCTGGCGACGCGGCATTTCGGGTAGCCCGTGACAGTTATCCTGACACCCGACACTGGCTGGTGTTGTGTGGTCATGGCAACAACGGCGGCGATGGTTACGTCGTGGCGCGACTAGCGCAAGCGGCGGGCATTAGCGTAACGTTGCTGGCGCAGGAGAGCGACAAACCGTTGCCTGAAGAAGCGGCGCAGGCGCGCGATGCCTGGCTGAATGCCGGCGGCATCATCCATGCTGCCGATATTATCTGGCCGGAAGCGACGGATCTGATT…	ATG	TGA
deoD	ATGGCAACTCCACATATTAATGCAGAAATGGGTGATTTCGCTGACGTCGTATTGATGCCGGGCGACCCGCTGCGCGCGAAGCACATTGCTGAGACTTTCCTCGAAAATGTTCGCGAAGTGAACAACGTTCGCGGCATGTTAGGTTTCACCGGGACTTACAAAGGCCGTAAGATCTCCGTGATGGGCCACGGTATGGGTATCCCGTCCTGCTCCATCTACACCAAAGAGCTGATCACCGATTTCGGCGTGAAGAAAATCATTCGCGTCGGCTCCTGCGGCGCTGTGCGCATGGACGTCAAACTGCGCGACGTGGTGATCGGTATGGGTGCCTGCACCGACTCCAAAGTGAACCGTATCCGTTTTAAAGATCATGACTTCGCGGCTATCGCTGACTTCGAC…	ATG	TAA
sapC	ATGCCTTACGATAGCGTATACAGCGAAAAGCGCCCGCCAGGCACCCTGCGCACTGCCTGGCGTAAATTTTATAGCGACGCGCCTGCGATGGTGGGTCTGTATGGATGCGCCGGTCTGGCGTTGCTGTGTATTTTTGGCGGCTGGATCGCGCCCTATGGTATCGATCAGCAATTTCTGGGCTATCAGCTACTGCCACCCTCCTGGTCACGCTATGGCGAAGTCTCCTTTTTTCTGGGGACTGACGATCTGGGGCGCGATGTGCTGAGCCGCCTGTTAAGCGGCGCGGCGCCCACGGTCGGCGGCGCGTTTATCGTAACGCTGGCGGCTACGCTATGTGGATTAGTCCTCGGCGTAGTGGCAGGCGCGACGCACGGTTTACGCTCTGCCGTGCTGAACCAT…	ATG	TAA
caiA	ATGGATTTCAACTTAAATGACGAACAGGAGCTGTTTGTCGCCGGTATTCGCGAACTGATGGCCAGTGAGAACTGGGAAGCTTATTTTGCCGAGTGCGATCGTGACAGCGTCTACCCTGAGCGTTTTGTAAAAGCGCTGGCGGATATGGGTATTGATAGCCTGCTGATCCCGGAAGAACACGGCGGTCTGGAAGCGGGTTTTGTTACCGTCGCCGCCGTCTGGATGGAACTGGGACGTCTTGGCGCGCCAACTTACGTGTTGTACCAATTGCCGGGAGGTTTTAACACTTTCCTGCGTGAAGGGACTCAGGAGCAAATTGATAAAATCATGGCGTTCCGGGGCACCGGTAAGCAGATGTGGAACTCTGCTATCACCGAACCAGGAGCGGGATCGGATGTT…	ATG	TAA
ribH	ATGAACATTATTAAAGCTAACGTTGCAGCCCCTGACGCTCGTGTCGCCATCACTATTGCGCGTTTCAATCAGTTTATCAACGACAGCCTGCTGGATGGCGCGGTTGATGCCCTGACGCGTATTGGTCAGGTAAAAGATGATAATATTACCGTAGTGTGGGTGCCTGGCGCCTATGAACTGCCGCTGGCGACCGAAGCGCTGGCGAAAAGCGGTAAATACGACGCCGTGGTTGCGCTGGGAACCGTGATTCGCGGGGGGACTGCGCACTTTGAATATGTGGCAGGCGGCGCCAGCAATGGCCTGGCAAGCGTTGCCCAGGACAGCGGCGTGCCGGTAGCCTTTGGTGTTCTGACCACCGAGAGTATTGAACAAGCCATCGAACGTGCTGGTACAAAAGCC…	ATG	TGA
gst	ATGAAACTGTTCTACAAACCGGGTGCCTGCTCTCTTGCTTCCCATATTACCCTGCGCGAAATTGGCAAAGACTTTACGCTTGATGGCGTCGATCTCGCAAAAAAACGCCTGGAAAACGGTGATGATTACCTGGCAGTCAACCCTAAAGGACAGGTTCCGGCTCTGCTGCTGGATGACGGCACACTGTTGACTGAAGGCGTCGCCATTATGCAGTACCTCGCCGACAGCGTTCCCGACCGCCAGCTTCTGGCGCCGGTAAGTAGTCTTGCTCGCTATCATACGCTGGAATGGCTCAACTATATTGCAACGGAACTGCATAAAGGCTTTACCCCGCTGTTCCGCCCTGACACGCCGGAAACACTCAAACCCGCCGTTCGCGCCGGTCTGGAAAAGAAATTG…	ATG	TAA
SL1344_4451	ATGGTTGTCTGGGGCGGTTCTCGTAAAATTCCATACCGGCCTCCGCATAGAACAGAAAATGCGGGCATCATGAATGTCTGTACAAACAATACCGGGATAAAAAGCACGGTTAGTGCAACGTGGATAAATAAGGAGGGCAATTGA	ATG	TGA
SL1344_2548	ATGAAGCGAGAAATACTTTCGCTGCGGTACACCACAAGATACTCTGAGCTATTGCGTGTTAAGTAA	ATG	TAA
eutD	ATGATCATTGAACGCGCCCGCGAACTGGCGGTACGCGCCCCCGCCAGAGTCGTCTTTCCTGATGCGCTGGACGAACGCGTGCTGAAAGCGGCGCATTACCTGCAACAGTACGGTCTGGCTCGCCCCGTTCTGGTCGCCAGTCCGTTTGCGCTGCGTCAGTTTGCCCTGAGTCATCGTATGGCGATGGATGGCATTCAGGTCATCGACCCACACAGCAACCTGAGTATGCGCCAGCGTTTTGCGCAACGCTGGCTTGCCCGTGCCGGAGAAAAAACGCCGCCGGACGCAGTGGAAAAGCTTAGCGATCCGCTGATGTTCGCTGCCGCCATGGTGAGCGCCGGTGAGGCTGATGTGTGTATCGCAGGCAACCTGTCGTCAACGGCGAACGTGCTGCGCGCA…	ATG	TGA
SL1344_1983	ATGAAATTTAAATTCGCCACATTACTCACAGCCGCCACGGTTTTTTACTCTTATCAGAGCGTTGCACAAAGTCAGCAATCGCCTGATGTCTGGTCAGTTGTCGAACAGAAACTGCAAAATGCCGTCCCTTTAAATGAAAACACCACTTTTAAATCGCAGGCAGCCTGGTTTGAATTACACAGGGAACTGTTTATGTACGGCCCGATGAGCCGTGCGGATGCATTACTGAAAAAGCTGGACACACAATCGAATGATGCGAAGTTTTCGCTAAACCATGAGGCCTCGTGGATCGCTGAAAATAATAGCCCGGATGCCGCGATGGTTTTCCTGTCCAAAATTGGTCTCGATAAACCGTCGAGCATTACCGCCTACGAGAGCTACGTTGATGGCTGGGTTAAT…	ATG	TAA
SL1344_2716	GTGACCACCCTGACATTACAACAGGCTTTTGAAGCCTGCCAGACGAACAAAACCGCGTGGCTGAACCGTAAAACCGAACTGGCCGCCGCAGAGCAGGAATATCAGGAATTATTGCTGGATGACAATGCATCAGGTTCCCGCAGATTACAGTCGCTGCGCGACCTGATTGACGTAAAAAAGTGGGAAGTTAATCAGGCCGCCGGTCGCTACATCTTCTCGCATGAGGAGGTGCAGCGCATCAGCATCCGTAACCGGCTGCATGATTTTATGCAGCAGAACGGCGCAGAGCTGACCGCCGCACTGGCACCGGAGCTGATGGGGATTAAAAACCAGCCCGCGATGATAAAAAACCGCGCGCTTGACCGTTCAGCCTCTTACCTGAGAGAAGCTCTTTCCGTC…	GTG	TAG
selB	ATGATTATTGCAACTGCCGGACACGTAGACCACGGTAAAACGACGTTGCTCCAGGCGATTACCGGGGTCAATGCCGATCGCCTGCCGGAAGAGAAAAAACGCGGGATGACTATCGATCTGGGCTACGCCTATTGGCCGCAGCCGGATGGTCGTGTGCTGGGCTTTATCGATGTGCCTGGGCATGAAAAATTCCTCTCTAACATGCTGGCGGGCGTAGGCGGTATCGATCACGCTTTGCTGGTGGTCGCCTGTGATGACGGCGTCATGGCGCAAACGCGCGAGCATTTACAGATCCTACAACTGACGGGTAATCTCCAGCTCACCGTCGCGCTGACCAAAGCCGATCGCGTGGACGAGGCGCGTATCGGTGAAGTACGTGAAGAGGTACTGGCGGCGCTC…	ATG	TGA
SL1344_3171	ATGACCTTATTTGCGGAGTATAACAGCCCCTATCTGTTTGCCATCGCGTTCGTTTTCTTTATCGGCGTGCTGGAGATGATTTCGCTGATTTTTGGCCACTTTCTTTCAGGCGCGCTCGACGCCCATCTCGATCATTATGACGCCCTGTCATCCGGCCCTGCGGGCCAGGCGCTTCATTATCTGAATATTGGACGCGTTCCCGCCCTGGTCGTCCTCTGTCTATTGGCCGGTTATTTCGGCCTCTTCGGTATCCTCATCCAGCATGGCGGGATCATGCTCTGGCAAGCGCCGCTCAGCAATCTGCTGCTGGTCCCGTTGAGCATTGTCCTGTCGGTCTTTGCCGTGCATTACAGCGGAAAAATCCTCGCGCCCTGGCTACCCAGAGATGAAAGCTCCGCC…	ATG	TAA
tyrP	GTGAAAAACAGAACTCTGGGCAGTATTTTTATCGTGGCAGGCACCACTATCGGCGCCGGGATGCTGGCAATGCCGCTGGCAGCGGCTGGCGTTGGTTTCAGCGTCACGCTGGGATTGTTGATTGGTCTGTGGGCGCTGATGTGTTATACCGCGCTACTATTACTGGAGGTATATCAACACGTTCCGGCGGATACCGGGCTGGGCTCGTTGGCAAAACGCTATCTTGGGCGTTACGGACAGTGGCTTACGGGATTCAGTATGATGTTCTTAATGTATGCGCTCACTGCCGCCTACATTTCCGGAGCCGGAGAATTACTGGCATCCAGTATTAATAACTGGCTTGGCGCCACGCTCTCGCCCGCTGCCGGAGTACTGCTGTTCACCTTTGTTGCCGGTGGG…	GTG	TAA
pyrD	TTGCACACCGGGAATCCAGGAGAGTTCATGTACTATCCCTTCGTTCGTAAAGCCCTTTTCCAGCTCGATCCAGAGCGCGCTCATGAATTTACATTTCAACAATTACGCCGCATTACAGGTACGCCGCTGGAAGCGCTGGTGCGCCAGAAAGTACCGACAAAGCCGGTTACCTGCATGGGACTTACCTTTAAAAATCCACTGGGGCTGGCTGCCGGTCTGGATAAAGACGGGGAGTGCATCGACGCGTTAGGCGCGATGGGGTTTGGCTCCCTGGAAATCGGCACCGTGACGCCGCGCCCACAGCCGGGTAACGATAAGCCGCGTCTTTTTCGTCTGGTGGATGCTGAAGGTCTGATCAATCGGATGGGCTTTAATAATCTGGGCGTCGATAACCTGGTC…	TTG	TAA
metR	ATGATCGAAATTAAACATCTGAAAACACTCCAGGCATTGCGGAATAGTGGATCGCTGGCTGCCGCGGCGGCGGTGCTGCACCAGACCCAATCCGCTCTGTCTCATCAGTTCAGCGATCTGGAACAACGCCTTGGCTTCCGCCTGTTCGTGCGTAAAAGCCAGCCGCTGCGCTTTACGCCGCAGGGGGAAGTTCTGCTGCAACTGGCAAACCAAGTGCTGCCGCAAATCAGCCGTGCGCTGCAGGCGTGCAACGAACCGCAGCAAACTCGTCTGCGCATCGCTATTGAATGTCATAGCTGTATTCAGTGGCTGACCCCGGCGCTGGAAAACTTCCGTGCAAGCTGGCCGCAGGTAGAAATGGATTTCACCTCCGGCGTCACTTTTGATCCGCAACCGGCC…	ATG	TAA
bcr	GTGACCACCCGGCAGCACTCTTCCTTTGCCATTGTCTTTATTCTTGGCCTGTTGGCCATGTTAATGCCGCTGTCAATTGATATGTATCTTCCAGCGCTGCCGGTGATTTCTGCGCAATTCGGCGTGCCTGCCGGTAGCGCGCAGATGACGCTCAGCACCTATATTTTGGGGTTTGCGCTGGGTCAGCTTATCTATGGACCGATGGCGGATAGCCTCGGGCGTAAGCCGGTCATCCTGGGCGGGACGCTGGTATTTGCCGCTGCGGCGGTCGCCTGTGCGTTGGCGCAGACTATCGATCAACTGATCGTGATGCGTTTCTTTCACGGTTTGGCGGCCGCGGCGGCAAGCGTCGTCATCAATGCGCTGATGCGGGATATTTATCCAAAGGAAGAGTTTTCG…	GTG	TGA
gltL	ATGATTACCCTGAAAAATGTTTCAAAATGGTATGGTCACTTTCAGGTGCTGACCGATTGTTCAACAGAAGTGAAAAAAGGTGAGGTGGTAGTAGTCTGCGGGCCATCGGGTTCCGGTAAATCCACGCTAATTAAGACCGTCAACGGTCTGGAACCAGTGCAAAAAGGCGAAATTACCGTTAACGGCATTATTGTGAACGACAAAAAAACCGATCTGGCGAAACTGCGTTCCCGCGTGGGCATGGTATTCCAGCACTTCGAGCTGTTTCCCCACCTGTCGATCATCGAAAACCTGACGCTGGCGCAGGTGAAAGTGCTGAAACGCGATAAGGCCGCCGCCCGCGATAAAGGCCTGAAGCTGCTGGAGCGCGTTGGCCTGTCTGCACATGCCAACAAGTTC…	ATG	TAA
SL1344_2935	ATGGTAAAATTAACGCCAAAGGCCAGTGAAGATCTGGAAAATATCTGGCATTACGGCTGGCAGCATTTTGGCGAAATACAGGCCGATCGATATATTAATCATCTATCAGAAATATTCAGCATTATGAGTGCCAATAACATTGGCACGCCTCGACCTGAACTGGGTGAATACATTTATGCCTTACCGTTTAAAAGGCATATTATCTATTTTATACAATCAGTTACGGAAGTTATCGTGATACGTATTCTGAGCCAGAATCAGGATGCTGGTAAGCATGTAAATTGGTTATAG	ATG	TAG
yjeS	ATGTCAAAGCCCCTCGATCTCAATCAGTTAGCGCAAAATATTAAGCAGTGGGGGCTGGAGCTGGGCTTTCAGCAGGTCGGTATTACTGATACCGATCTGCGCGCATCCGAACCTGCGCTGCAGGCGTGGCTGGACAAACAATACCACGGCGAGATGGCATGGATGGCGCGCCACGGTATGATGCGCGCCCGGCCTCATGAACTCTTACCCGGTACGCTACGTGTCATCAGCGTGCGCATGAACTATCTGCCCGCCAACGCCGCGTTTGCCAGTACGTTGAAGGATCCCACGCTGGGCTACGTTAGCCGATATGCGCTGGGGCGTGATTATCACAAGCTATTACGCAGCCGCCTTAAAAAACTGGGCGAGCAGATCCAGCAGTACTGCGGTTCGCTGAAT…	ATG	TGA
SL1344_4135	ATGGATAATGAGTTTTATACCCTCCTGACCGACAGGGGAATGGCGAAAATCGCCAGCGCCCTTGCGGATAAAAAACAGCTACATCTGCAAAAGATGGCGGTTGGCGACGGTGGTGGGCAATATTATGAACCGATCGCCAGCCAGACCAAATTACGCCACGAAGTCTGGCGCGGCGAGATGAATACGCTGACGGTTGCGCCGAATAATCCCAACTGGCTGATTGCCGAACTGGTGCTGCCGGAGGACGTTGGCGGCTGGTATGTGCGTGAAGTGGGCGTGTTCGACGACGAGGGCGAGCTGATCGCCATCGGCAAATTCCCTGAGTCGTACAAACCGCTGCTGCCGGGCGGCTGTGGCAAGCAGGTTTGTATCCGCCTGATTATGGAAGTCTCCAACACC…	ATG	TGA
sapB	GTGTCCAGCATTAACGGCCAGCTGATCTCCGAACAGCTTAAAGAGGTGTTTCCCGCCACGATGGAGCTGTGCATTCTCGCCTTTGGTTTTGCGCTGATGGTCGGCATCCCGGTCGGGATGCTGGCGGGCGTGACGCGTAGCAAATGGCCGGATCGTTTTATCAGCGCGCTGGCACTATTAGGTTTCTCAATTCCGGTTTTCTGGCTGGCGCTTCTGCTCACACTGTTCTTTTCGCTCACGCTGGGGTGGCTGCCGGTATCCGGGCGATTTGACCTGCTTTATGAAGTTAAACCGGTTACCGGTTTCGCCATCATTGACGCCTGGATTTCAGATTCGCCATGGCGTGATGAAATGGTGATGAGCGCCATACGGCATATGGTTTTACCGGTGCTCACGCTC…	GTG	TAG
caiB	ATGGCGCTGTGCTTATCCGGCCTACATACCGCAAAAAATGCCAGGAGAAAAATGATGAATCATTTACCAATGCCAACCTTTGGCCCGCTTGCTGGGGTACGCGTTGTTTTTTCAGGAATCGAAATCGCCGGTCCATTCGCCGGACAGATGTTCGCCGAATGGGGCGCAGAGGTTATCTGGATTGAAAACGTCGCATGGGCCGATACCATCCGCGTACAGCCTAACTACCCGCAGCTCTCACGCCGCAACCTGCACGCCCTGTCGCTGAATATTTTCAAAGATGAAGGTCGGGAAGCGTTTCTGAAACTGATGGAAACCACCGATATTTTCATTGAAGCCAGTAAAGGCCCGGCCTTTGCCCGCCGTGGTATTACTGATGAAGTGCTGTGGGAACATAAC…	ATG	TAA
ribD	ATGCAGGATGAGTTTTACATGGCGCGAGCGCTCAAACTGGCGCAGCGTGGACGTTTCACCACTCACCCTAACCCTAATGTCGGCTGTGTCATTGTTAACAATGGCGACATCGTCGGCGAAGGTTATCACCATCGCGCCGGAGAGCCGCACGCCGAGGTTCATGCGCTGCGGATGGCGGGCGCAAAAGCCAAAGGCGCAACCGCCTATGTCACGCTTGAACCCTGTAGCCATCATGGGCGAACGCCGCCATGTTGCGATGCGCTGATTGCGGCCGGCGTCGCGCGCGTGGTCGCCGCGATGCAGGACCCGAACCCACAGGTCGCCGGGCGTGGGCTGTATCGCCTGCAACAGGCGGGTATTGCGGTCAGCCACGGGTTAATGATGAGTGAAGCGGAGGCG…	ATG	TGA
pdxY	ATGAAGAATATCCTCGCTATCCAGTCCCATGTTGTTTTCGGACATGCGGGCAACAGCGCCGCCGAATTTCCCATGCGCCGTCTTGGCGCGAATGTTTGGCCGCTGAATACCGTTCAGTTTTCTAACCACACGCAATATGGTAAATGGACCGGCTGTGTCATGCCGCCCAGCCATCTGACTGAGATTGTCCAGGGGATTGCGGACATTGGCCAGTTAGCGCACTGCGACGCCGTACTTAGCGGTTACCTGGGATCTGCCGAGCAGGGAGAACACATTCTCGGTATTGTGCGCCAGGTTAAAGCAGCAAATCCGCAGGCAAAATATTTCTGCGATCCCGTGATGGGGCATCCGGAAAAGGGTTGTATCGTGGCGCCTGGCGTCGCAGAGTTCCATGTGCGT…	ATG	TAA
hrpB	ATGCTACAATGCGGCGCAAAGAAAGTTAACCCCGTGGAGCCGTTTGTGACGTCATTGCCCGTTGCCGCCGTATTGCCTGAATTGTTGACAGCCCTAAAAATCGCGCCGCAGGTTTTGTTGTCCGCGCCTACCGGGGCGGGGAAATCCACCTGGCTGCCGTTGCAACTCCTGCAACAGGGGCCGGTTGCTGGAAAAATCCTCCTGCTTGAACCGCGTCGTCTGGCGGCGCGTAATGTCGCACAGCGTCTGGCGGAAGCGTTGAATGAAAAGCCTGGCGAAACGGTAGGTTACCGGATGCGCGCGCAAAGCTGCGTGGGGCCGCGTACCCGGCTGGAAGTGGTGACCGAAGGCGTATTGACCAGAATGATTCAGCGCGATCCCGAATTACGCGGCGTGGGG…	ATG	TGA
yhcQ	GTGAAAACACTAACAAGAAAACTCTCCCGTACGGCCATTACCCTCGTACTGGTTATTCTGGCCTTTATCGCCATTTTCCGCGCCTGGGTGTATTACACCGAATCTCCCTGGACGCGCGACGCGCGTTTTAGCGCCGATGTCGTCGCTATTGCCCCGGATGTCGCGGGCCTGATTACCCATGTAAACGTGCATGATAACCAACTGGTGAAAAAGGATCAGGTCCTGTTTACCATCGATCAGCCACGCTATCAAAAAGCGCTGGCGGAAGCGGAAGCTGATGTAGCCTATTATCAGGTACTGGCGCAGGAAAAACGCCAGGAAGCCGGTCGCCGTAATCGCCTCGGCGTACAGGCGATGTCCCGGGAAGAGATCGATCAGGCGAACAACGTCTTGCAGACG…	GTG	TAA
SL1344_2547	GTGATGAGATTCGTATATATTTATATCTTAGTGATTTATGGATCATACTTGTGGTTTTCCTTAGGAGGTAACATGTTTACAATTAATAGTACTAACAGGGTGGCGAGCACAATCGCTCCATATGCATGTGTAAGCGATGTTAATTTAGAGGACAAGGCTACATTTTTAGATGAACATACCTCAATACATGCGAATGATTCTTCTTTGCAATGCTTTGTCTTAAATGATCAGCATGTTCCGCAGAATACATTAGCTACAGATGTTGAAGGCTACAATAGAGGATTACAGGAACGTATAAGCCTCGAGTACCAGCCCCTGGAAAGCATTGTTTTTCTACTCGGCACCCCTGCAGTTTTAGAGACTAAAGAGTCTTTATCATTACCAGTTTCCCCGGATGCT…	GTG	TAA
SL1344_1167	ATGGAATACCAATTAACTCTTAACTGGCCCGACTTTCTTGAACGCCACTGGCAAAAACGCCCGGTGGTCTTAAAACGTGGGTTTAGCAACTTTATCGATCCGCTCTCGCCGGATGAGCTGGCGGGGCTGGCGATGGAAAGCGAAATCGACAGCCGACTCGTTAGCCATCAGGATGGCAAATGGCAGGTCAGCCATGGTCCTTTCGAAAGCTACGATCATCTGGGTGAGAGCAACTGGTCGCTGCTGGTACAGGCGGTAAACCACTGGCACGAACCCACCGCCGCGTTGATGCGCCCGTTCCGCGCTCTGCCGGACTGGCGTATCGACGATCTGATGATCTCCTTTTCCGTTCCCGGCGGCGGCGTTGGCCCGCATCTGGATCAGTATGATGTGTTTATT…	ATG	TAA
eutM	ATGGAAGCATTAGGAATGATTGAAACCCGGGGCCTGGTTGCGCTGATTGAGGCCTCCGATGCGATGGTAAAAGCCGCGCGCGTGAAGCTGGTCGGCGTGAAGCAGATTGGCGGTGGCCTGTGTACTGCCATGGTGCGTGGCGATGTGGCGGCGTGCAAAGCCGCAACCGATGCTGGCGCCGCTGCGGCGCAGCGCATTGGCGAGTTGGTCTCCGTACACGTGATTCCACGCCCGCACGGCGATCTGGAAGAAGTGTTCCCGATCAGCTTCAAAGGCGACAGCAACATTTGA	ATG	TGA
SL1344_3646	ATGCAGCAATATATCGGTATTGATGTGGGAGGAACTCACGTCAAATATGGCGTGATTAACAGTGACGGCGAAGAATTAACCCATCATCAATTCGATACGCCAGAGGACGCCTCCACGTTTACCCGCAAATGGCAGGATGTGGTGGCGCGTTGCCAACAGGACTATGACATTGCGGCAATCGGGGTCAGTTTCCCTGGCCATATTAATCCCCATAACGGTCATGCGGCAAAAGCGGGCGCGCTGGCTTACCTGGATGACGTCAACCTGATGGAGTTGTTCAGCGGGCTGACCGATCTGCCGCTGGTCGTGGAGAACGACGCGAACTGTGCGGCGCTGGGCGAAATGTGGCGAGGTGCCGGGCAGCATTATGAAAACATGGTCTGCATTACCATTGGAACC…	ATG	TAA
glgS	ATGCTGATGAACAACAATAACGTCTATTCATTAAATAATTTCGATTTTCTGGCGCGCAGTTTTGCCAGAATGCAGGCGGAGGGGCGTCCTGTTGATATCCAGGCGGTAACCGGCAATATGGACGAGGAGCATCGCGACTGGTTTTGCAAGCGTTACGCGCTTTACTGCCAGCAGGCGACTCAGGCGAAAAGGTTAGAATTAGAACACTAA	ATG	TAA
SL1344_1869	ATGGATTCCATTCATGGTCACGAAGTGCTCAACATGATGATTGAGTCTGGCGAGCAGTACACGCATACCTCGCTGGAGGCGGCAATAAAAGCGCGCTTTGGCGAGCGGGCACGATTTCACACTTGTTCAGCATCAGATATGACGGCGGCGGAACTGGTCGCGTTTCTGGCGGCGAAAGGAAAGTTTATTGCGGTGGAGGACGGTTTTTCAACGCATGAGAGTAAAATCTGCCGCCATTAA	ATG	TAA
pepN	ATGACACAACAGCCACAAGCCAAATACCGCCATGACTATCGCGCGCCGGATTACCAGATTACTGATATTGACTTGACCTTTGACCTCGATGCCGAAAAAACCGTGGTCACCGCAATAAGCCAGGCTGTTCGTCATGGCGCGCCTGATGCGCCTCTTCGCCTTGATGGGGAAGATTTAACGCTGGTATCTATCCACGTCAACGATGCGCCGTGGACAGCATATAAAGAAGAAGAGGGCGCGCTTGTCATCAGCGACCTGCCAGAGCGTTTTACGTTACGCATTGTCAACGAGATAAGTCCGGCGGCGAATACGGCGCTGGAAGGATTGTACCAGTCAGGCGATGCGCTCTGTACCCAGTGTGAAGCGGAGGGCTTCCGCCATATTACCTGGTATCTTGAC…	ATG	TGA
ybeK	ATGGCACTGCCCATTATTATTGATTGCGATCCGGGTCATGATGACGCGATCGCCCTCGTTCTCGCCCTCGCCTCCCCTGAACTGGAAGTGAAAGCGATCACCTCTTCCGCCGGTAACCAGACGCCGGAGAAGACCCTGCGCAACGTGCTGCGGATGCTGACACTGCTCAAACGCCTGGATATTCCGGTGGCGGGCGGCGCGGTGAAACCTCTCATGCGCGAACTGATTATCGCCGATAACGTTCACGGCGAAAGCGGCCTCGACGGCCCGGCGCTGCCCGAGCCGTCATTCGCCCCGCAAAGCGGCACTGCCGTTGAGCTGATGGCAAAAACGCTGCGCGAGAGCGCACAACCGGTCACCATCGTCTCCACTGGCCCACAGACCAACGTGGCGCTGCTG…	ATG	TAA
SL1344_2197	GTGAATACATTACAGCTCTCAATTGTTCACCGTCTGCCGCAAAACTATCGCTGGTCGGCGGGTTTTGCGGGGTCAAAGGTTGAACCGATTCCGCAAAACGGGCAGAGCACCGAGAATAGTCTGGTGGCGCTTAAACTGTTGAGTCCGGCAGGCGATAGCGCGTGGTCAGTGATGCATAAGCTCAGCCAGGCGCTAAGCGATATTGAAGTTCCTTGCTCCGTGCTGGAGTGCGAAGGGGAGCCGTGCCTGTTCGTTAATCGTCAGGATGAGTTTGCCGCCACCTGTCGGCTGAAAAATTTCGGCGTGGCGATAGCGGAACCTTTTTCTAACAATAATCCTTTTTAG	GTG	TAG
yigM	GTGGCGCTACTCATCATTACCACTATCCTGTGGGCTTTCTCCTTTAGTTTATTTGGCGAGTATCTTGCCGGGCATGTCGATAGCTATTTCGCGGTGCTGATACGCGTTGGGCTGGCGGCGCTCGTTTTTCTGCCGTTTTTGCGTACTCGCGGGCACAACCTAAAAACCATCAGCCTGTATATGCTGGTGGGGGCGATGCAGCTTGGCATCATGTATATGTTGAGCTTCCATGCTTACCTCTACCTGACCGTATCCGAACTGCTGTTGTTTACCGTTCTGACGCCGCTCTATATCACGCTGATTTACGATGTGATGAGTCAGCGTCGTTTGCGCTGGGGCTATGCATTTAGCGCGTTGCTGGCGGTGATTGGCGCCGGGATTATTCGCTACGATCGCGTG…	GTG	TAA
SL1344_2934	ATGGGAATTGTCTCCGGCGCTCAAGCCGCGGGTAGCAACACAGCAAAGGTCACTTTCCTTGGTAATATTGTTGATTCCCCCTGCTCTCTCACACTTGTTTTTTAG	ATG	TAG
SL1344_4288	ATGAAAAAAAAACTTATTGTCATGCTGTTAGCCAGCCTCTCCGTTCACGCCGCTTCCGTTTCCGCCAGAACATTACATTTTGGCACCTCCGCCACCTATGCGCCCTATGAGTTTGTCGATGCCGATAATAAAATTGTTGGTTTCGATATTGATGTCGCCAACGCGGTCTGCAAAGAGATGCAAGCGGAGTGCTCATTCACTAACCAGAGCTTTGATAGTCTGATCCCCAGCCTACGCTTCAAAAAGTTTGATGCGGTGATCGCCGGTATGGATATGACGCCCAAACGTGAGCAGCAGGTCTCCTTTAGCCAACCCTATTACGAAGGTCTATCGGCGGTAGTCGTCACGCGTAAAGGGGCTTATCACACTTTTGCCGATCTGAAAGGCAAAAAAGTCGGT…	ATG	TAA
deoB	ATGAAACGTGCATTTATTATGGTGCTGGACTCATTCGGCATCGGCGCTACTGAAGACGCGGATCGTTTTGGCGACGTAGGTTCCGACACTCTGGGCCACATCGCAGAAGCTTGCGCCAAAGGCGAAGCTGACAATGGCCGTAAAGGCCCGTTGAATCTGCCTAACCTGACTCGTCTGGGGCTGGTGAAAGCGCATGAAGGCTCTACCGGTAAAATTGCCGCCGGCATGGACGGCAACGCGGACGTTATTGGCGCATACGCATGGGCGCACGAACTGTCCTCCGGCAAAGATACGCCGTCCGGCCACTGGGAAATCGCCGGCGTGCCGGTGCTGTTCGACTGGGGCTATTTCAGCGATCACGAAAACAGCTTCCCGCAGGAACTGCTGGATAAGCTGGTG…	ATG	TGA
sapA	ATGCGCCTGGTTTTATCGTCTCTGATCGTGATAGCGGGTCTACTAAGTAGTCAGGCTACGGCTGCGACTGCGCCCGAACAAACTGCGAGTGCAGATATTCGCGATAGCGGCTTTGTGTATTGTGTCAGCGGGCAGGTCAACACCTTTAATCCGCAAAAAGCGAGCAGCGGCCTCATCGTCGATACCCTGGCCGCCCAGTTATATGATCGCCTGTTGGATGTCGATCCCTATACTTATCGTTTAGTCCCAGAGCTGGCAGAAAGCTGGGAAGTGCTGGATAACGGGGCAACGTACCGTTTTCACCTGCGCCGCGACGTTTCCTTTCAAAAAACCGCCTGGTTTACGCCGACCCGAAAACTCAATGCTGATGATGTCGTCTTTACCTTTCAGCGGATTTTC…	ATG	TGA
caiC	ATGGATATCGTTGGCGGACAAAACTTACGTCAGATGTGGGACGACCTGGCCGGGGTGTACGGAGATAAAACGGCGTTAATTTTCGAATCCTGTGAGGGAATCGTTCGGCAGTTTAGCTATGCTTCGCTCAATGAAGAGATTAACCGCACGGCGAACCTTTTTTATTCCTTAGGGATCCGCAAGGGTGATAGGGTCGCGCTGCATCTGGATAACTGTCCGGAATTCATCTTTTGCTGGTTTGGACTGGCAAAAATCGGCGCCATTATGGTGCCGATTAATGCCCGCTTACTGGGCGAAGAAAGCGCCTGGATCCTGCAAAACAGCCAGGTGAGTCTGCTGGTTACCAGCGCCCAGTTTTATCCTATGTACCGTGAAATACGCCAGGACAATAGCACTCCG…	ATG	TAA
SL1344_0409	ATGCATTGCCCATTTTGTTTCGCCGTAGATACCAAAGTCATTGACTCTCGTCTTGTAGGCGAGGGCTCGTCCGTGCGCCGCCGTCGGCAGTGCCTGGTGTGTAATGAACGCTTTACGACCTTCGAAGTGGCTGAACTGGTCATGCCGCGCGTGATAAAAAGCAACGATGTGCGCGAACCCTTTAATGAGGATAAGCTGCGTAGCGGCATGTTGAGAGCGCTGGAAAAAAGACCCGTCAGCGCAGATGATGTTGAAATGGCATTGAACCATATTAAGTCACAATTACGTGCCACTGGGGAGCGTGAAGTTCCCAGCAAGATGATTGGCAACCTGGTCATGGAGCAGCTGAAAAAACTCGATAAAGTCGCGTATATTCGCTTTGCCTCCGTCTATCGCAGT…	ATG	TAA
SL1344_4450	ATGGCTTACCAGACAGTGAATCCTGCCAATAATCAGCTCATTAAAGAGTACCCCCCGCACACGGACGCGGATATTGAAGCCGCGCTGCAAAAAGCTGACGCGCTCTATCACTCCGATTGGTCCAAAGGAGAGATTGACCAACGTCTGCCGGTACTGCATAAGCTGGCTGACTTGATCGACAGCCGTGTTGAAGAACTGGCAAAAATCGCCAGCCAGGAGATGGGCAAGCTCATCGAGCAGAGCCGTGGCGAAGTCAAACTGTGTGCGCAGATCGCTCGCTATTATGCGGATAAAGCGAAGCAGTTTCTTGCCCCGGTGCCTTATAAAACCGAGTTTGGCGACGCGTGGGTAGAACATCATCCGATTGGCGTCATCATGGCTGTTGAGCCGTGGAACTTC…	ATG	TAA
tyrS	ATGGCAAGCAGTAACTTGATTAAACAATTGCAAGAGCGGGGGCTGGTAGCCCAGGTGACGGACGAAGACGCGTTGGCAGAGCGACTGGCGCAAGGCCCGATCGCGCTCTATTGCGGCTTCGATCCTACCGCTGACAGCTTGCATTTGGGGCATCTGGTTCCATTGTTATGCCTGAAACGCTTCCAGCAGGCAGGGCACAAACCTGTTGCGCTGGTAGGCGGCGCGACCGGTCTGATTGGCGACCCGAGCTTCAAAGCCGCCGAGCGTAAACTGAACACTGAAGAGACCGTTCAGGAGTGGGTGGCGAAAATTCGTAAACAGGTTGCCCCATTCCTGGACTTTGATTGCGGCGAAAACTCCGCCATCGCGGCCAATAACTATGACTGGTTCGGCAGCATG…	ATG	TAA
SL1344_2546	ATGAAAATAGGATTCCAACCAGCCATATTGCAATATGCATATACAAGTAACGAGGCGACATCAAACCTTGAGTTATTAAATAAATGGAGAATAGAATCCCCAGATATTGAGAAGGAGGAGCGTAATAGTATTTACGACAAAATAATAGAAGCAAATCATACCGGGAGCTTATCAATTACTGCTCATCATGTTACCTCTATTCCGGTATTTCCTGATAATTTATCCGAATTGAATTTATCTTCATGCTATACACTGGAGTCTATTCCAAATCTTCCTGATGGGTTAAAAAGTTTAACTATATCTGGAAATCAGACCATTAAAATTTCATATTTCCCAGATAGCTTAGAGTCACTATCTATAGATATGCAGGCATATGAAGAAAATTATACTTTCCCCGCA…	ATG	TGA
eutN	ATGGAGGCGGATATGAAACTGGCAGTCGTCACAGGACAAATCGTATGTACCGTCCGCCATCAGGGACTGGCGCATGACAAATTGCTGATGGTGGAAATGATCGATGCCCAGGGCAACCCCGACGGGCAGTGTGCCGTCGCTATCGACAGTATCGGGGCGGGAACCGGAGAGTGGGTACTGCTGGTCAGCGGCAGTTCCGCACGCCAGGCGCATCGCAGCGAATTATCACCGGTCGATCTGTGCGTCATTGGCATCGTCGATGAAGTGGTGGCTGGCGGGAAAGTGGTTTTCCATAAATAG	ATG	TAG
SL1344_1982	TTGAAGAAAATATTCATAACAATTATAGTTTCATTATATTGCGCGAATATATGTGCAAAACAATCCCCCAGTACAGAATCCAAACCCGTTAATTTCATCGCCCAAATTGAAAATATCGATTTTAATAAAACCGCCATTAGCAGTGACCTGAAACTTTTACTCGCCGACCGTTATTATTTTAAAGATAAAACACCCTGTAATACTAATACCCTTTCTGCGCGCGCAGAATCAATGGGACTGACGACAGAAGAATATATTAATAAAATACGCAGTTTAAGACCGGCTATTCTCGATGACCGTTATTTTTACCTGACGGTCGATCAGTGCGATGCTGGCGGCACGCCCATGCTGACTGGAATCGAGCTATGTACCGAAGCGCTGTGCGGTGCCGAATACATG…	TTG	TAA
aldB	ATGACGAACAATCCCCCTTCAACACGTATTCAGCCAGGTGAATACGGGTACCCACTGAAGTTAAAAGCCCGCTATGACAATTTTATTGGTGGTGACTGGGTTGCGCCCGCCGACGGCGAATATTATCAAAACCTGACGCCAGTGACCGGCCAGCCGCTATGTGAAGTCGCTTCCTCCGGTAAAAAAGATATCGATTTAGCGCTCGACGCCGCGCATAAGGCGAAAGATAAGTGGGCGCATACGTCAGTACAAGACCGTGCCGCTATCTTGTTTAAGATCGCCGATCGGATGGAACAAAACCTCGAACTGTTGGCGACAGCGGAAACCTGGGATAACGGTAAACCGATTCGTGAAACCAGCGCCGCCGACGTACCGCTGGCGATCGATCATTTCCGCTAT…	ATG	TGA
SL1344_3169	ATGATTGACCCGAAAAAAATTGAGCAAATCGCACGCCAGGTTCATGAGTCAATGCCGAAAGGTATTCGCGAGTTCGGGGAAGATATCGAGAAAAAAATCCGTCAAACGCTGCAATCTCAGCTGACGCGTCTCGATCTGGTGAGCCGCGAAGAGTTTGATGTCCAGACTCAGGTCTTGCTGCGCACCCGGGAAAAACTGGCGCTGCTGGAGCAACGCCTCAGCGAACTGGAAGCTCGCGACAAGCCTGAAGAAGTAAAACCTGCGCCCGCCATTCCGCCAGTCGATCCACAACAAGAGTAA	ATG	TAA
SL1344_2715	ATGACTTCTGGCGTTAATTTTAAGGATAATACTGGACCTGTACATATAATTAACCAGCCGCGAGTGTTAAGAGCCAGTGTTATTGGTAAGCTGATTGAGATTATTTCCAATCCAGTTGGTGGCGAGCAAAGTTTAAACAGAAAAGCATCAAATATTGATGTTAAAATCTCATTCAATGATCTTAAAAGAAACAGATGGGTAGCCGAACTTTATAAAGAAGATGCTCTGTTAGTTGATGAATCTATAAAAACACTTGATACTATAATTTTAAATGGTAGTGTCAAATTAAAAAGACAGTTTAGAGGCTATTATAATACTGCATTGGGGTTATATGGTCTTTATGAGAAGCCATTTAACATTGAAGTCATCAGGAAAAACTCAGATAATATTATCGATAAT…	ATG	TGA
ftnA	ATGCTGAAAACAGAAATGATCGACAAACTGAATGAGCAAATGAATCTGGAGTTGTACTCCTCCCTGCTCTATCAACAAATGAGCGCGTGGTGTAGCTATCACAGTTTTGAAGGCGCGGCCGCATTTCTTCGTCGCCATGCGCAAGAAGAGATGACGCATATGCAGCGCCTGTTTGACTACCTTACCGATACCGGAAGCCTGCCGCGCATTCATACCGTTTCTTCGCCCTTCGCTGAGTACGCCTCGCTGGATGAGCTGTTCCGCGCGACCTATGAGCATGAGCAGCTTATTACGCAAAAAATTAATGAACTGGCTCATGCCGCAATGACCAGCCAGGATTATCCGACATTTAATTTCTTGCAGTGGTATGTGGCAGAACAGCATGAAGAAGAAAAATTA…	ATG	TAA
gtgF	ATGTTCGTAGAACTGGTTTATGACAAGCGTAATGTTGAAGGACTCGAAGGGGCCAGCGAGATCATTCTGGCCGAACTGACGAAGCAGGTGCACCAGATTTTCCCTGATGCCGAAGTGAGGGTGAAGCCGATGCAGGCAAACTGCTTGAATAGTGATACCAACAAAAGCGATCGCGAAAATTTGAACAGATAG	ATG	TAG
yejF	ATGACATCTCCATTGCTTGCGATTGAAAATTTATCGGTAGGTTTCCGTCAGCAACAGCACGTGCGCCCTGTCGTTAACGCCATTTCGTTACAGGTGAACGCCGGGGAAACGCTGGCGCTGGTCGGCGAGTCAGGGTCAGGGAAAAGCGTGACGGCGCTTTCCATTCTGCGTCTTTTGCCTACCCCTCCCGCCGTCTACCTCTCCGGCGATATTCGCTTTCACGGCGAATCATTGCTTCATGCCAGCGAGCAGACGTTACGCGGCGTGCGCGGCAATAAAATCGCCATGATTTTTCAGGAACCGATGGTTTCACTTAACCCACTGCATACGCTGGAAAAACAGCTCTATGAAGTGCTGTCGCTCCATCGGGGAATGAGTCGGGAGGCGGCAAGGGCGGAG…	ATG	TGA
SL1344_0649	ATGTTTTGGCGTAACAATAGACCTGAAATCAGCCTGCTACAGCACGATGTAGCCCATATTACGTTTTCAGTACGTAACGGAAAAGCATTGCTTCGTCCCAGCGTTATCCACGATCCCGACTCTGACGCCGGTATTCATACGCTTTCCTGGCATGGCTCGCCGCTGATTCGTTTTTACACTGAAGCCTGGTGCCCGACCTGCGCAGAATTTGTTTATGCCGGTTTTAGCAATGATGATGAAGGCGCCGCGGAGTTTTTATCCTCACTTGCCGAGTGGAATCAGCCAGGAGTCGGGTTGAACGAAGCATTTACCGCCCTGACGCCGCTGTTTTCACTCTTTGCCGATGGCTATTACCGACTGGAGGAACGCGAACTTTATCCCACAGATGGCAACGGACAT…	ATG	TGA
SL1344_3916	ATGTATCAGGTTGTTGCGTCTGATTTAGATGGCACGCTGCTCTCCCCCGACCATACGTTGTCCCCTTATGCCAAAGAGACTCTGAAGCTGTTGACCGCACGCGGCATCCATTTTGTCTTTGCCACTGGTCGTCATCATGTCGATGTAGGGCAAATCCGCGATAATCTTGAAATCAAGTCTTACATGATCACCTCCAACGGCGCGCGAGTGCACGATACCGACGGGAATTTGGTTTTTACGCATAATCTGGACAGCGACATTGCCAGCGACCTGTTCGGGGTGGTGAATGCGAACCCGGACATCGTGACTAACGTTTATCGCGACGACGAATGGTTTATGAATCGTCATCGCCCCGATGAAATGCGTTTTTTCAAAGAGGCGGTATTTAACTACTCGCTG…	ATG	TGA
SL1344_2933	ATGACAACTAACCATCAAATTGACCGTCTTCTCACCCTCATGCAGCGCCTGCGCGACCCGGAAAACGGCTGCCCGTGGGATAAAGAGCAGACCTTCGCCAGCATCGCGCCTTATACGCTGGAAGAAACCTATGAAGTACTGGATGCGATTGCGCGTGAGGATTTTGACGATTTGCGCGGCGAACTGGGCGACCTGTTGTTCCAGGTGGTGTTTTACGCGCAGATGGCGCAGGAAGAAGGCCGCTTCGATTTTAATGATATCTGCGCTGCCATCAGCGACAAGCTGGAGCGCCGCCATCCGCATGTTTTTGGCGAGCTTTCCGCGGATAATAGCGAAGAAGCATTAGTTCGCTGGGAGCAAATCAAAACGGAAGAGCGCGCGCAAAAAGCGCAGCATTCC…	ATG	TAA
orn	ATGAGTGCCGATGAAAACAACCTGATTTGGATCGATCTGGAGATGACAGGTCTGGACCCCGAGCGCGATCGCATTATTGAGATAGCCACACTGGTGACGGATGCCAGCCTGAACATTCTGGCGGAAGGGCCGACGATTGCGGTACATCAATCCGATGCGCAACTGGCGTTAATGGATGACTGGAACGTGCGCACCCATACCGGTAGCGGCCTGGTAGATCGCGTTAAGGCAAGTACGATGGGCGAACGAGATGCTGAACTGGCGACGATTGAATTTCTGAAAACGTGGGTGCCTGCGGGTAAGTCGCCGATTTGCGGTAACAGCATCGGTCAGGATCGTCGTTTTCTGTTTAAATATATGCCGGAACTGGAGGCCTACTTCCACTATCGCTATCTGGAT…	ATG	TGA
SL1344_4134	ATGACTCAATATGCATATTACCATCCGGCAACCTTTGAGGTTATAGACTGGATTGATACTTCTTCATTAAACGTAGTGTTACCTGACTCAGTAATTTCTATAGATGATGAGCAGTGGCGACTAAGAGATAAAAATTGTTGGGTGTGCCTTAACCCTCTTGAATTTATTACTACACCGCCACCCGGAAAATTTTACCGATTACAGGGAAACGAGTGGGTATATGACGAAGCGTTATTTGTCTCAGCACTTGAAAGTGTAAAAGCACAAGTTATACAGGCAATCAAAGCTCACCGTGATGATGTTACCGCCGATTATATCGTTATCGACGGCAACCATTTCCACAGCGATGCTAACAGCCGTATTCAGCAAATGTCACTCACCAGAATGGGTCAGGCACAG…	ATG	TGA
pspF	ATGGCTGAATTTAAAGATAACCTGCTCGGCGAGGCAAACCGTTTTCTTGAAGTACTGGAACAAGTCTCCCGGCTCGCGCCGCTGGATAAGCCAGTGCTGATTATTGGCGAACGCGGGACGGGTAAAGAACTTATCGCCAATCGACTGCATTATCTCTCTTCACGCTGGCAGGGGCCGCTTATCTCGCTTAACTGCGCGGCGCTTAACGAAAATCTGCTGGACTCCGAACTGTTTGGCCATGAAGCGGGCGCTTTTACCGGGGCGCAAAAACGTCATCCCGGTCGCTTTGAACGCGCCGATGGCGGCACGCTGTTTTTGGATGAACTGGCGACAGCGCCGATGCTGGTACAGGAAAAGCTGCTGCGGGTGATTGAATATGGCGAGCTAGAGCGCGTCGGC…	ATG	TAG
caiD	ATGAGTGAGTCATTACATCTGACCCGTAACGGCCCGATCCTGGAAATTACCCTCGACCGACCTAAAGCGAATGCCATTGACGCCAAAACCAGCTTTGCAATGGGTGAAGCTTTTCTTAATTTCCGTGACGATCCGGAATTACGCGTAGCAATCATTACCGGCGGCGGGGAGAAATTCTTTTCTGCTGGCTGGGACTTAAAAGCGGCAGCGGAAGGTGAAGCGCCGGATGCCGATTTTGGTCCCGGCGGCTTTGCCGGTTTAACCGAAATATTTGACCTCGATAAGCCGGTTATCGCCGCGGTGAACGGCTACGCGTTTGGCGGCGGTTTTGAGCTGGCGCTGGCGGCGGACTTTATTGTCTGCGCCGAAAACGCCAGCTTCGCGCTGCCGGAAGCCAAG…	ATG	TAA
SL1344_3542	ATGAAAAATATCAAAGTCATCACCGGCGTTATCGCGACGCTGGGCATATTTAGCGCCTTATTGCTGGTGACAGGAATACTGTTTTATTCCGCCGTCAGCAGCGATCGGCTGAATTTCCAGAATGCGAGCGCACTGAGTTACCAACAACAGGAACTGGGCGGCAGTTTTCAGACATTGATCGAAACCCGCGTCACCATTAACCGCGTGGCGATACGCATGTTAAAAAATCAGCGCGATCCCGCCTCACTGGACGCCATGAACACGCTGTTAACCAACGCTGGCGCGTCGCTCAACGAAGCGGAAAAACATTTCAACAACTACGTGAACTCCGAAGCGATCGCGGGCAAAGATCCGGCGTTGGATGCCCAGGCCGAAGCCAGCTTTAAGCAGATGTATGAC…	ATG	TAA
yajI	ATGACAAGACGTTACCTAAGAATTCTCCTGGTGGGAAGTCTCTTGAGCCTGACCGCCTGCGCGCCGCAGAGCGAAGTTCGCCAGATGCATCAAAGCATTAGCACCCTGAATAAAGAGATGACCCAACTGAATCAGGAAACGGTAAAAATTACCCAACAAAATAAGCTGAATGCGGAGTCAACCCGCGGCGTCTATTTGTTGCCTGGCGCCAATACGCCTGCCCGGCTGGAGAGCCAGATCGGTACGCTACGTATGACATTGCTGGAAATTACGCCTGTCGCAGACGGCGCTCACGCAACGTTACACATTCAGGGCGAGTCCCGCGATCCACTGCCGGCATTCAGCGCTACCGTAGAGTACGGGCAACTTCAGGGCACTACGGAGAACTATCAGGAGGTG…	ATG	TAA
pdxH	ATGTCTGATAACGACCAATTGCAGCAGATCGCGCATCTGCGCCGTGAATACACGAAAGGCGGCTTGCGTCGCCGCGATTTACCCGCTGAACCGTTAACCTTATTTGAGCGCTGGCTTGGGCAAGCGTGCGACGCCAGACTGGCCGATCCAACGGCAATGGTCGTGGCGACCGTAGATGACAAGGGTCAACCGTACCAGCGTATTGTGTTGCTCAAGCATTATGATGAAAAAGGCCTGGTCTTTTATACCAACCTGGGAAGCCGCAAGGCGCATCAGATTGAGCACAATCCGCGTATCAGCCTGTTATTTCCCTGGCATATGCTTGAACGCCAGGTGATGGTGACAGGCAAAGCCGAGCGTCTCTCCACTCTTGAGGTGGTGAGGTATTTCCACAGCCGT…	ATG	TAA
ligT	ATGTCTGAGCCAAAACGGCTGTTTTTTGCGATTGACTTACCCGACGACGCGCGCGCGCAAATTATCGCCTGGCGCGCCGCCCATTTTGCGTCTGAAGACGGACGCCCCGTGGCAGCGGCGAACCTGCACCTGACGCTGGCCTTTTTAGGCGACGTCAGTAGCGATAAGCAGCGCTCGCTTGCGCAACTGGCCGGACGAATTCGACAGCCGGGCTTTACGCTACATCTGGATGACGCCGGTCAGTGGCTGCGTTCGCGCGTGGTGTGGCTGGGGATGCGCCAGCCGCCGCGCGGGTTGTTGCAGTTGGCTAATATGCTGCGCGCGCAGGCCGCCCGCAGCGGTTGTTACCAAAGCCCGCAGCCTTTTCACCCGCATATTACGCTGCTGCGCGACGCCAGC…	ATG	TAA
yhcP	ATGGGCATTTTCTCCATTGCCAACCAGCACATTCGTTTTGCGGTAAAGCTGGCGTGCGCCATTGTGCTGGCATTATTTATCGGCTTCCATTTTCAACTGGAGACGCCGCGTTGGGCGGTGCTGACCGCCGCGATCGTGGCGGCAGGCCCGGCATTTGCCGCCGGCGGAGAACCCTATTCCGGCGCTATCCGTTATCGCGGAATGTTGCGTATTATCGGGACGTTTATTGGCTGTATCGCCGCGCTTATCATTATTATCTCTATGATCCGCGCGCCGTTATTGATGATTCTGGTGTGCTGTGTCTGGGCCGGTTTTTGTACCTGGATCTCCTCTTTAGTACGGATCGAAAACTCTTATGCGTGGGGACTGTCAGGTTATACTGCGCTGATCATTGTGATT…	ATG	TAA
lepA	ATGAAGAACATAAGAAATTTCTCCATCATTGCTCACATTGACCACGGTAAATCGACGCTGTCTGACCGTATTATCCAAATCTGCGGTGGCCTGTCTGACCGTGAAATGGAAGCTCAGGTACTTGATTCGATGGATCTTGAGCGTGAGCGCGGTATTACTATTAAAGCCCAGAGTGTGACGCTGGATTTTAAAGCGTCTGATGGTGAAACTTATCAACTGAACTTTATCGACACGCCGGGACACGTTGACTTTTCCTATGAAGTTTCCCGTTCGTTAGCCGCCTGCGAGGGCGCGCTGCTGGTGGTGGATGCCGGCCAGGGCGTAGAAGCGCAAACGTTGGCGAACTGCTACACCGCGATGGAAATGGATCTTGAAGTGGTGCCGGTGCTTAACAAGATT…	ATG	TAA
SL1344_1166	TTGCGGTCTGGCAACTGCAAAAGTTCAACAAGAAATCAAAAGGGGGTCCCAATGGGGGACGAAAAGAGCTTAGCGCACACCCGATGGAACTGTAAATATCACATAGTTTTCGCGCCCAAATACCGAAGACAAGCGTTCTATGGAGAGAAGCGTAGGGCAGTAGGCAGCATATTAAGAAAATTGTGTGAATGGAAAAACGTACGAATTCTGGAAGCAGAATGTTGTGCAGATCATATTCACATGCTTCTGGAGATCCCGCCGAAGATGAGTGTGTCGAGTTTCATGGGATATCTGAAGGGTAAAAGTAGTCTGATGCTTTACGAGCAGTTTGGGGATCTAAAATTCAAATACAGGAACAGGGAGTTCTGGTGCAGAGGGTACTATGTCGATACGGTGGGT…	TTG	TAA
SL1344_3478	ATGATCCGTATTTCCGATGCTGCACAAGCGCACTTTGCCAAACTGCTGGCAAATCAGGAAGAAGGGACGCAAATCCGCGTATTTGTCATTAATCCCGGCACTCCTAACGCAGAGTGCGGCGTTTCTTATTGTCCGCCCGACGCCGTAGAAGCCACCGATACTGCACTGAAATTTGACCTGTTGACCGCTTATGTCGACGAGCTGAGCGCGCCCTATCTGGAAGACGCGGAAATTGATTTCGTGACCGACCAGCTAGGTTCTCAACTCACATTGAAAGCGCCAAACGCGAAGATGCGCAAAGTGGCCGATGACGCGCCGCTGATGGAGCGCGTGGAATATGCTCTGCAATCGCAGATTAACCCGCAGTTGGCGGGCCACGGCGGTCGCGTCTCGCTGATG…	ATG	TAA
eutE	ATGAATCAACAGGATATTGAACAGGTGGTGAAAGCGGTACTGCTGAAAATGAAAGACAGCAGCCAGCCGGCCAGTACTGTTCATGAGATGGGCGTTTTTGCCTCCCTGGATGACGCAGTGGCGGCAGCAAAACGGGCCCAGCAGGGGCTGAAGAGCGTGGCGATGCGCCAGCTTGCCATTCATGCCATTCGCGAAGCGGGCGAAAAACACGCCCGAGAATTAGCGGAACTTGCCGTCAGCGAAACCGGCATGGGACGCGTTGACGATAAATTTGCCAAAAACGTGGCGCAGGCGCGCGGCACGCCGGGCGTCGAGTGTTTATCTCCGCAGGTGCTGACCGGCGATAACGGCCTGACGCTGATTGAAAATGCACCGTGGGGCGTGGTGGCCTCGGTCACG…	ATG	TAA
ribB	ATGAATCAGACGCTACTTTCCTCTTTTGGTACGCCTTTTGAACGTGTTGAACTTGCACTGGATGCGCTGCGTGAAGGACGCGGTGTGATGGTGCTTGATGATGAAGATCGTGAAAACGAAGGCGATATGATTTTCCCCGCAGAGACGATGACCGTAGAACAGATGGCGTTAACCATTCGTCACGGTAGCGGTATTGTTTGCCTGTGTATTACTGAAGACCGTCGTAAGCAGCTCGACTTGCCAATGATGGTGGAAAACAACACCAGCGCCTACGGCACCGGTTTTACCGTGACCATTGAAGCCGCAGAAGGCGTGACCACCGGCGTTTCCGCCGCTGACCGTGTCACTACGGTGCGTGCGGCAATTAAGGATGGCGCAAAACCGTCCGATCTTAACCGT…	ATG	TGA
SL1344_3644	ATGAACGTACTGGAAGTCGATCTGCATAAACTGACGGTCAGCGATCCGTTCCTCGGACAGTATCAACAACTGGTTCGCGATGTGGTTATTCCTTACCAGTGGGATGCGTTAAACGATCGTATTCCAGAGGCTGAACCCAGCCATGCCATTGAAAATTTCCGCATTGCCGCAGGCCAGCAGACGGGCGACTTTTACGGCATGGTCTTTCAGGACAGCGACGTGGCGAAATGGCTGGAAGCGGTTGCCTGGTCACTGTGCCAGAAGCCCGATCCAGCGCTTGAGAAAACCGCCGATGAGGTGATTGAACTGGTGGCCGCCGCGCAGTGTGACGATGGCTATCTCAATACGTACTTTACGGCAAAAGCCCCGCAAGAACGCTGGAGCAACCTGGCGGAGTGC…	ATG	TAA
pldB	ATGTTTCAGCAGCAAAATGACTGGGAAACAAGAGAAAATGCGTTTGCCGCTTTTGCTATGGGGCCGCTGACCGATTTCTGGCGTCAGCGGGAAGAGGCGGAGTTTATCGGCGTGGGTAACATTCCGGTGCGCTTTGTCCGTTTTCGAAATGATTCCAACGATCGGACGATCGTCATTTGTCCTGGCCGCATTGAGAGTTATGTAAAATACGCTGAACTGGCGTATGACCTTTTTCATCTCGGTTTTGATATCTTCATCATCGACCACCGTGGTCAAGGGCGCTCCGGGCGGATGTTATCGGACCCGCATCGGGGTCATGTCGATCATTTTAACGATTATGTTGAGGACTTAGCGGCGTTCTGGCAGCAGGAAATTGAGCCGGGGCCGTGGCGTAAGCGT…	ATG	TAG
SL1344_1867	ATGAAGCCTCTTATTTTTACTCTTTCACTGCTAGCCCTGACGGGATGCACCATTACTCGACAAGCGCAGGTCAGCGAAGCCAGCCCGATAAGCGGCATCGTGCGCCTGACGTATAACCAGCCGCTATTTTTTACTTCACGGACAGATGATTATGTATCTCACGGGACCGCAACACGCGAATGCCAGCAGATGGGCTATGCCGATGCCGTTTCGTTTGGTCAGCCGGTAGGAACCTGTAGCATTTATGCGGGCTCGTTGTGTCTGAACACCCGATTTACCCTCTCCTGGCAGTGCCGGGGCGTTGCCGTCCCGCAAATCATGCCGCTTTATTATTAA	ATG	TAA
gtgE	ATGTTAAGACACATTCAAAATAGTTTAGGCAGCGTTTACAGAAGTAATACAGCAACTCCTCAGGGTCAGATTATTCACCATCGTAACTTTCAAAGCCAGTTTGATACCACAGGCAACACCCTCTACAATAATTGCTGGGTTTGCTCATTAAATGTTATCAAATCCAGAGATGGCAATAATTATAGTGCATTAGAGGACATCACTTCTGATAATCAAGCGTTTAATAATATATTAGAGGGTATTGATATAATAGAATGTGAGAATTTATTAAAAGAAATGAATGTGCAAAAAATACCTGAATCCTCTCTTTTTACAAACATTAAAGAAGCTTTACAGGCAGAAGTTTTCAATAGTACTGTAGAAGATGACTTTGAGAGTTTTATTTCTTACGAATTACAA…	ATG	TGA
rplX	ATGGCAGCGAAAATCCGTCGTGATGACGAAGTTATCGTGTTAACCGGTAAAGATAAAGGTAAACGCGGTAAAGTTAAGAATGTCCTGTCTTCCGGCAAGGTCATTGTTGAAGGTATCAACCTGGTTAAGAAACACCAGAAGCCGGTTCCGGCTCTGAACCAACCGGGCGGCATCGTTGAAAAAGAAGCTGCAATTCAGGTTTCTAACGTTGCAATCTTCAATGCGGCAACCGGCAAGGCTGACCGTGTAGGCTTTAGATTCGAAGACGGCAAAAAAGTCCGTTTCTTCAAGTCTAACAGCGAAACTATCAAGTAA	ATG	TAA
pyrG	ATGACAACGAACTATATTTTTGTGACCGGCGGGGTCGTATCCTCTCTGGGTAAAGGCATTGCCGCAGCCTCCCTCGCAGCCATTCTGGAAGCCCGTGGTCTCAACGTGACCATCATGAAACTGGATCCGTACATCAACGTCGATCCGGGTACTATGAGCCCAATCCAACACGGGGAAGTGTTCGTTACTGAAGACGGCGCTGAAACCGACCTGGACCTGGGGCACTACGAGCGTTTCATCCGCACCAAGATGTCTCGCCGCAACAACTTCACGACTGGCCGCATCTACTCCGACGTTCTGCGTAAAGAACGCCGTGGCGACTATCTGGGCGCAACCGTACAGGTCATCCCTCACATCACTAACGCGATTAAAGAGCGCGTGCTGGAAGGTGGCGAAGGC…	ATG	TAA
yejE	ATGCCGCGATTAAGCCCGGTCAATCAGGCCCGCTGGGCGCGTTTCCGCCATAATCGCCGGGGCTACTGGTCACTATGGATTTTCCTGGTCGTGTTCAGCCTGAGCTTATGCGCGGAACTGATTGCTAACGATAAGCCATTGCTGGTGCGCTATGAAGGCCAGTGGTATTTTCCGCTGGTAAAAAATTACAGCGAGCGCGATTTCGGCGGCCCGCTGGCGACAACGGCGGATTATCAGGACCCCTGGCTACAACGGCAGCTTGAGAATCGGGGCTGGGTGTTGTGGGCCCCCGTACGCTTTAGTGCCAATACCATTAATTTTGCCACCACGCAGCCTTTCCCCTCCCCGCCTTCGGCGAAAAACTGGCTGGGCACCGATGCGAATGGCGGCGACGTTTTC…	ATG	TAA
SL1344_0648	ATGGATAATGCAACGTTAGCGATTGGTATCGATCTCGGCACCACTAATAGTTTAATCGCCGTCTGGCAAGACGGAGCCGCACAATTAATACCTAATAAATTTGGTGAATATTTAACACCATCCATAATTAGTATGGATGAAAATAAACAAATTCTGGTGGGAAAACCTGCCGCAGCCCGTAAAACATCTCATCCAGATAAAACCGCTGCCTTATTTAAACGCGCAATGGGCAGTAATACTCACTGGCATTTGGGTGAAGAGTCGTTTAATGCGCCGGAATTATCTTCGCTGGTTTTACGCTCGCTGAAAGAAGATGCGGAAGACTACCTTCAGCAGCCAATCAAGGATGTCGTGATCTCGGTTCCGGCTTATTTCAGCGATGAGCAGCGTAAGCATACA…	ATG	TAA
[truncated: 3,668 more rows]

## Sheet: PA14
Pseudomonas aeruginosa UCBPP-PA14 Genes codons
Data source: bacteria ensembl.org
Description of columns:
1.-Gene name
2.- Gene sequence
3.- Start codon for translation
4.-Stop codon of translation
Gene name	Sequence gene	Start codon	Stop codon
[truncated: 5,892 more rows]

## Sheet: PAO1
Pseudomonas aeruginosa PAO1 Genes codons
[truncated: 5,594 more rows]

[truncated: 2 more sheets: Bl21, W3110]
