# Supplementary material for: Consensus architecture of promoters and transcription units in Escherichia coli : design principles for synthetic biology
Source: Royal Society of Chemistry journal article supplement (doi:10.1039/c6mb00789a), 2017-02-17
Supplement: c6mb00789a4.xlsx [file c6mb00789a4.xlsx]

## Sheet: Operones_GenesV9.1
E. coli K-12 MG1655 operons annotaded in Regulon DB v9.0
Data source Regulon DB v9.0
Description of columns:
1.-Operon name
2.- Columns 2 and 3 are the operon coordinates (start and end)
4.- Transcription direction (strand)
5.- Number of genes by operon
6.-The 5-21 columns contain the names of genes in the operons
Operon name	Left_operon	Right_operon	Strand	#Genes_Operon	Gene1	Gene 2	Gene 3	Gene 4	Gene 5	Gene 6	Gene 7	Gene 8	Gene 9	Gene 10	Gene 11	Gene 12	Gene 13	Gene 14	Gene 15	Gene 16
aaeR	3387542	3388471	forward	1	aaeR
abgR	1402765	1403673	forward	1	abgR
accA	208621	209580	forward	1	accA
acnA	1333855	1336530	forward	1	acnA
acnB	131615	134212	forward	1	acnB
acpT	3610992	3611579	forward	1	acpT
acrD	2585617	2588730	forward	1	acrD
acrR	484985	485632	forward	1	acrR
acrZ	793996	794145	forward	1	acrZ
add	1700257	1701258	forward	1	add
adeD	3841987	3843753	forward	1	adeD
adk	496399	497043	forward	1	adk
agp	1064808	1066049	forward	1	agp
agrA	3646086	3646169	forward	1	agrA
agrB	3646317	3646400	forward	1	agrB
aidB	4412298	4413923	forward	1	aidB
alaE	2797186	2797635	forward	1	alaE
aldA	1486256	1487695	forward	1	aldA
allA	531675	532157	forward	1	allA
allR	532235	533050	forward	1	allR
alpA	2756666	2756878	forward	1	alpA
alr	4263805	4264884	forward	1	alr
alx	3236602	3237567	forward	1	alx
amn	2053085	2054539	forward	1	amn
amyA	2004180	2005667	forward	1	amyA
aphA	4267437	4268150	forward	1	aphA
appY	582904	583653	forward	1	appY
apt	490636	491187	forward	1	apt
araC	70387	71265	forward	1	araC
arcZ	3348599	3348719	forward	1	arcZ
argA	2947264	2948595	forward	1	argA
argG	3316659	3318002	forward	1	argG
argP	3057775	3058668	forward	1	argP
argR	3382725	3383195	forward	1	argR
argS	1958086	1959819	forward	1	argS
argU	563946	564022	forward	1	argU
argW	2464331	2464405	forward	1	argW
aroG	784856	785908	forward	1	aroG
aroH	1786459	1787505	forward	1	aroH
aslB	3980981	3982216	forward	1	aslB
asnA	3925178	3926170	forward	1	asnA
asnT	2042573	2042648	forward	1	asnT
asnU	2057875	2057950	forward	1	asnU
asnV	2060284	2060359	forward	1	asnV
aspT	3944895	3944971	forward	1	aspT
aspU	228928	229004	forward	1	aspU
aspV	236931	237007	forward	1	aspV
asr	1669400	1669708	forward	1	asr
avtA	3737728	3738981	forward	1	avtA
bamD	2734168	2734905	forward	1	bamD
bamE	2751627	2751968	forward	1	bamE
barA	2913079	2915835	forward	1	barA
bcp	2598500	2598970	forward	1	bcp
bdcR	4472147	4472740	forward	1	bdcR
betT	328687	330720	forward	1	betT
bglA	3041684	3043123	forward	1	bglA
bhsA	1168296	1168553	forward	1	bhsA
blr	1702575	1702700	forward	1	blr
bolA	453696	454013	forward	1	bolA
bssR	877471	877854	forward	1	bssR
C0067	238462	238586	forward	1	C0067
C0293	1195937	1196009	forward	1	C0293
C0299	1229852	1229930	forward	1	C0299
C0362	1550025	1550410	forward	1	C0362
C0465	1970763	1970840	forward	1	C0465
C0664	2833077	2833189	forward	1	C0664
C0719	3119380	3119601	forward	1	C0719
caiF	34300	34695	forward	1	caiF
cbrA	3867400	3868464	forward	1	cbrA
cdaR	182463	183620	forward	1	cdaR
cdd	2229866	2230750	forward	1	cdd
cdgI	1868409	1869884	forward	1	cdgI
cdh	4107953	4108708	forward	1	cdh
cdsA	195677	196534	forward	1	cdsA
cfa	1739437	1740585	forward	1	cfa
chiX	506428	506511	forward	1	chiX
cho	1821539	1822426	forward	1	cho
clcA	175107	176528	forward	1	clcA
clcB	1663339	1664595	forward	1	clcB
clpA	922487	924763	forward	1	clpA
clpS	922136	922456	forward	1	clpS
cnu	1702973	1703188	forward	1	cnu
cof	466636	467454	forward	1	cof
corA	3999449	4000399	forward	1	corA
cpxP	4103843	4104343	forward	1	cpxP
cra	88028	89032	forward	1	cra
crl	257829	258230	forward	1	crl
crp	3484142	3484774	forward	1	crp
csiE	2663457	2664737	forward	1	csiE
csiR	2793696	2794358	forward	1	csiR
cspA	3718072	3718284	forward	1	cspA
cspE	656515	656724	forward	1	cspE
cspF	1639879	1640091	forward	1	cspF
cspG	1050684	1050896	forward	1	cspG
csrC	4049059	4049303	forward	1	csrC
cstA	629117	631222	forward	1	cstA
cueO	137083	138633	forward	1	cueO
cueR	513217	513624	forward	1	cueR
curA	1517051	1518088	forward	1	curA
cyaA	3989176	3991722	forward	1	cyaA
cyaR	2165138	2165224	forward	1	cyaR
cybB	1488926	1489456	forward	1	cybB
cybC	4457576	4457878	forward	1	cybC
cycA	4427887	4429299	forward	1	cycA
cysB	1331879	1332853	forward	1	cysB
cysK	2530431	2531402	forward	1	cysK
cysQ	4434778	4435518	forward	1	cysQ
cysS	553834	555219	forward	1	cysS
cysZ	2529485	2530246	forward	1	cysZ
dacB	3326985	3328418	forward	1	dacB
dacC	879950	881152	forward	1	dacC
dapB	28374	29195	forward	1	dapB
dcrB	3607978	3608535	forward	1	dcrB
dcuD	3372891	3374258	forward	1	dcuD
degP	180884	182308	forward	1	degP
dfp	3810754	3811974	forward	1	dfp
dgcC	402927	404042	forward	1	dgcC
dgcE	2141290	2144607	forward	1	dgcE
dgcJ	1870065	1871555	forward	1	dgcJ
dgcP	1875739	1876764	forward	1	dgcP
dgcT	1092099	1093457	forward	1	dgcT
dgkA	4254660	4255028	forward	1	dgkA
dgt	179237	180754	forward	1	dgt
dhaR	1250289	1252208	forward	1	dhaR
diaA	3293831	3294421	forward	1	diaA
dicA	1645958	1646365	forward	1	dicA
dicF	1647406	1647458	forward	1	dicF
dinD	3815783	3816607	forward	1	dinD
dinG	832293	834443	forward	1	dinG
djlA	57364	58179	forward	1	djlA
dkgB	229167	229970	forward	1	dkgB
dld	2220207	2221922	forward	1	dld
dmlA	1879936	1881021	forward	1	dmlA
dnaB	4262337	4263752	forward	1	dnaB
dnaQ	236067	236798	forward	1	dnaQ
dnaX	491316	493247	forward	1	dnaX
dtpA	1710793	1712295	forward	1	dtpA
dtpB	3638885	3640354	forward	1	dtpB
dusA	4259692	4260729	forward	1	dusA
dxr	193521	194717	forward	1	dxr
eamB	2713445	2714032	forward	1	eamB
ebgR	3219488	3220471	forward	1	ebgR
eco	2301927	2302415	forward	1	eco
efp	4373722	4374288	forward	1	efp
elaD	2380735	2381946	forward	1	elaD
elfA	997091	997630	forward	1	elfA
emrD	3851945	3853129	forward	1	emrD
emtA	1242403	1243014	forward	1	emtA
endA	3088369	3089076	forward	1	endA
entS	621523	622773	forward	1	entS
epmA	4380666	4381643	forward	1	epmA
erpA	176610	176954	forward	1	erpA
esrE	4018001	4018252	forward	1	esrE
exuR	3244674	3245450	forward	1	exuR
exuT	3243246	3244544	forward	1	exuT
fadH	3229687	3231705	forward	1	fadH
fadL	2459322	2460668	forward	1	fadL
fadM	463626	464024	forward	1	fadM
fadR	1234161	1234880	forward	1	fadR
fdhD	4084039	4084872	forward	1	fdhD
feaB	1445543	1447042	forward	1	feaB
ffs	475672	475785	forward	1	ffs
fieF	4104492	4105394	forward	1	fieF
fimB	4538980	4539582	forward	1	fimB
fimE	4540060	4540656	forward	1	fimE
fklB	4426958	4427578	forward	1	fklB
fldB	3037877	3038398	forward	1	fldB
flk	2435972	2436967	forward	1	flk
flxA	1644429	1644761	forward	1	flxA
fnrS	1407153	1407271	forward	1	fnrS
folA	49823	50302	forward	1	folA
fre	4024550	4025251	forward	1	fre
frr	192872	193429	forward	1	frr
frsA	256527	257771	forward	1	frsA
frwD	4145161	4145502	forward	1	frwD
fsaA	862865	863527	forward	1	fsaA
ftnA	1986740	1987237	forward	1	ftnA
ftnB	1984949	1985452	forward	1	ftnB
ftsK	932447	936436	forward	1	ftsK
fxsA	4366687	4367163	forward	1	fxsA
gadY	3662887	3662991	forward	1	gadY
galP	3086306	3087700	forward	1	galP
galR	2974621	2975652	forward	1	galR
galU	1290680	1291588	forward	1	galU
garD	3273304	3274875	forward	1	garD
gcvB	2940718	2940922	forward	1	gcvB
gcvR	2597928	2598500	forward	1	gcvR
gdhA	1840395	1841738	forward	1	gdhA
ghrA	1097109	1098047	forward	1	ghrA
ghrB	3715333	3716307	forward	1	ghrB
ghxP	4276502	4277851	forward	1	ghxP
glcC	3126294	3127058	forward	1	glcC
glmZ	3984455	3984626	forward	1	glmZ
glnS	705316	706980	forward	1	glnS
glpD	3560036	3561541	forward	1	glpD
gltP	4292504	4293817	forward	1	gltP
gmhB	222833	223408	forward	1	gmhB
gmk	3819451	3820074	forward	1	gmk
gntT	3544581	3545897	forward	1	gntT
gor	3644322	3645674	forward	1	gor
gpt	255977	256435	forward	1	gpt
greB	3534834	3535310	forward	1	greB
gsk	499349	500653	forward	1	gsk
gstA	1712401	1713006	forward	1	gstA
guaC	113444	114487	forward	1	guaC
hchA	2033859	2034710	forward	1	hchA
hdeD	3655018	3655590	forward	1	hdeD
helD	1023694	1025748	forward	1	helD
hemH	497279	498241	forward	1	hemH
hemN	4050068	4051441	forward	1	hemN
hmp	2683857	2685047	forward	1	hmp
hokE	607059	607211	forward	1	hokE
holE	1923132	1923362	forward	1	holE
hpt	141431	141967	forward	1	hpt
hrpA	1481142	1484987	forward	1	hrpA
hrpB	162105	164534	forward	1	hrpB
htgA	10830	11315	forward	1	htgA
htpG	494344	496218	forward	1	htpG
hupA	4198304	4198576	forward	1	hupA
hupB	460675	460947	forward	1	hupB
hyuA	3008050	3009435	forward	1	hyuA
iap	2874603	2875640	forward	1	iap
icd	1194346	1195596	forward	1	icd
icdC	1210648	1210800	forward	1	icdC
idi	3031087	3031635	forward	1	idi
idnK	4492646	4493209	forward	1	idnK
ileX	3213620	3213695	forward	1	ileX
ilvC	3955993	3957468	forward	1	ilvC
insA-7	4516550	4516825	forward	1	insA-7
insH-4	1394100	1395116	forward	1	insH-4
insH-9	3128200	3129216	forward	1	insH-9
insI-2	1467382	1468533	forward	1	insI-2
insJ	3718703	3719224	forward	1	insJ
insK	3719177	3720072	forward	1	insK
insL-1	15445	16557	forward	1	insL-1
insL-2	607288	608400	forward	1	insL-2
insL-3	2512353	2513465	forward	1	insL-3
insN-2	4505220	4505486	forward	1	insN-2
intA	2754181	2755422	forward	1	intA
intB	4494773	4495963	forward	1	intB
intG	2010526	2010804	forward	1	intG
intS	2464567	2465724	forward	1	intS
intZ	2556793	2558088	forward	1	intZ
iraD	4555016	4555408	forward	1	iraD
iraP	400610	400870	forward	1	iraP
IS128	2651537	2651745	forward	1	IS128
ispB	3331732	3332703	forward	1	ispB
ispU	194903	195664	forward	1	ispU
ivy	240343	240816	forward	1	ivy
katE	1811891	1814152	forward	1	katE
katG	4131858	4134038	forward	1	katG
kdgK	3677442	3678371	forward	1	kdgK
kdgT	4099713	4100696	forward	1	kdgT
kptA	4558953	4559507	forward	1	kptA
kup	3929339	3931207	forward	1	kup
lafU	250072	250827	forward	1	lafU
ldcC	209679	211820	forward	1	ldcC
ldtD	980270	982117	forward	1	ldtD
leuO	84368	85312	forward	1	leuO
leuX	4494428	4494512	forward	1	leuX
lgoD	4594013	4595035	forward	1	lgoD
lit	1197918	1198811	forward	1	lit
loiP	3079935	3080693	forward	1	loiP
lpcA	243543	244121	forward	1	lpcA
lpoA	3291422	3293458	forward	1	lpoA
lpp	1755445	1755681	forward	1	lpp
lpxP	2493667	2494587	forward	1	lpxP
lrp	931818	932312	forward	1	lrp
lysQ	780800	780875	forward	1	lysQ
lysR	2977043	2977978	forward	1	lysR
lysZ	780592	780667	forward	1	lysZ
mak	409368	410276	forward	1	mak
malS	3735520	3737550	forward	1	malS
malT	3551107	3553812	forward	1	malT
malZ	421742	423556	forward	1	malZ
manA	1686600	1687775	forward	1	manA
matP	1017708	1018160	forward	1	matP
mcbR	1518286	1518951	forward	1	mcbR
mcrA	1209569	1210402	forward	1	mcrA
mdaB	3170552	3171133	forward	1	mdaB
mdfA	882896	884128	forward	1	mdfA
mdtK	1741481	1742854	forward	1	mdtK
mdtL	3889638	3890813	forward	1	mdtL
mepH	1732459	1733274	forward	1	mepH
mepS	2268001	2268567	forward	1	mepS
metA	4212303	4213232	forward	1	metA
metC	3150258	3151445	forward	1	metC
metE	4011076	4013337	forward	1	metE
metF	4130639	4131529	forward	1	metF
metG	2192322	2194355	forward	1	metG
metH	4221851	4225534	forward	1	metH
metK	3084728	3085882	forward	1	metK
mhpT	374683	375894	forward	1	mhpT
micA	2812824	2812895	forward	1	micA
micC	1435145	1435253	forward	1	micC
micF	2311106	2311198	forward	1	micF
mlrA	2212888	2213619	forward	1	mlrA
mltF	2693823	2695379	forward	1	mltF
mnmC	2439786	2441792	forward	1	mnmC
mnmE	3884851	3886215	forward	1	mnmE
mntP	1903712	1904278	forward	1	mntP
mocA	3013182	3013760	forward	1	mocA
mog	9306	9893	forward	1	mog
molR_1	2194496	2195320	forward	1	molR_1
molR_2	2195432	2197369	forward	1	molR_2
mpl	4453808	4455181	forward	1	mpl
mppA	1391251	1392864	forward	1	mppA
mrcA	3520893	3523445	forward	1	mrcA
mrcB	164730	167264	forward	1	mrcB
mrr	4584972	4585886	forward	1	mrr
mscK	485760	489122	forward	1	mscK
mscL	3436046	3436456	forward	1	mscL
mtfA	2041675	2042472	forward	1	mtfA
murJ	1127062	1128597	forward	1	murJ
mutH	2967684	2968373	forward	1	mutH
mutS	2855115	2857676	forward	1	mutS
nadB	2708442	2710064	forward	1	nadB
nadE	1820482	1821309	forward	1	nadE
nadK	2748853	2749731	forward	1	nadK
nagE	703167	705113	forward	1	nagE
narK	1277180	1278571	forward	1	narK
narP	2288522	2289169	forward	1	narP
narQ	2583753	2585453	forward	1	narQ
ndh	1165308	1166612	forward	1	ndh
nfo	2248862	2249719	forward	1	nfo
nhoA	1532048	1532893	forward	1	nhoA
nimT	1873697	1874878	forward	1	nimT
nohB	580057	580602	forward	1	nohB
nudG	1839514	1839921	forward	1	nudG
nudI	2362576	2363001	forward	1	nudI
nupC	2511064	2512266	forward	1	nupC
ohsC	2698542	2698618	forward	1	ohsC
ompG	1379971	1380876	forward	1	ompG
ompW	1312044	1312682	forward	1	ompW
ompX	849673	850188	forward	1	ompX
opgD	1494880	1496535	forward	1	opgD
orn	4389627	4390172	forward	1	orn
ortT	1515413	1515586	forward	1	ortT
osmC	1554649	1555080	forward	1	osmC
osmY	4609419	4610024	forward	1	osmY
oxyR	4156513	4157430	forward	1	oxyR
pagP	655780	656340	forward	1	pagP
panZ	3596007	3596390	forward	1	panZ
patA	3217516	3218895	forward	1	patA
pbl	2992063	2992437	forward	1	pbl
pck	3530840	3532462	forward	1	pck
pdeC	4273494	4275080	forward	1	pdeC
pdeD	1896451	1898049	forward	1	pdeD
pdeG	1216551	1218074	forward	1	pdeG
pdeL	331595	332683	forward	1	pdeL
pdeN	2268748	2270304	forward	1	pdeN
pepN	989845	992457	forward	1	pepN
pepT	1185067	1186293	forward	1	pepT
pfkA	4105575	4106537	forward	1	pfkA
pfkB	1804394	1805323	forward	1	pfkB
pgi	4231781	4233430	forward	1	pgi
pgl	797809	798804	forward	1	pgl
pgpB	1337354	1338118	forward	1	pgpB
pgrR	1390015	1390914	forward	1	pgrR
pheP	601182	602558	forward	1	pheP
pheV	3108388	3108463	forward	1	pheV
phoH	1084215	1085279	forward	1	phoH
pinE	1208908	1209462	forward	1	pinE
pinQ	1631646	1632236	forward	1	pinQ
pitA	3635665	3637164	forward	1	pitA
pldA	4002885	4003754	forward	1	pldA
pmbA	4455982	4457334	forward	1	pmbA
polA	4044989	4047775	forward	1	polA
pphB	2857782	2858438	forward	1	pphB
ppiD	461139	463010	forward	1	ppiD
ppsR	1785469	1786302	forward	1	ppsR
pptA	1531076	1531309	forward	1	pptA
prfC	4607437	4609026	forward	1	prfC
prkB	3482512	3483381	forward	1	prkB
proL	2284233	2284309	forward	1	proL
proP	4328525	4330027	forward	1	proP
psiE	4238348	4238758	forward	1	psiE
pspG	4260863	4261105	forward	1	pspG
psrO	3309247	3309420	forward	1	psrO
pssA	2720749	2722104	forward	1	pssA
ptsG	1157092	1158525	forward	1	ptsG
purA	4402710	4404008	forward	1	purA
purR	1735868	1736893	forward	1	purR
purT	1928905	1930083	forward	1	purT
putP	1078528	1080036	forward	1	putP
pykA	1935673	1937115	forward	1	pykA
pykF	1753722	1755134	forward	1	pykF
pyrD	1003991	1005001	forward	1	pyrD
pyrH	191855	192580	forward	1	pyrH
queA	424235	425305	forward	1	queA
queD	2890236	2890601	forward	1	queD
queF	2923370	2924218	forward	1	queF
radD	2278654	2280414	forward	1	radD
raiA	2735176	2735517	forward	1	raiA
ralA	1411580	1411758	forward	1	ralA
rayT	247637	248134	forward	1	rayT
rbn	2379630	2380547	forward	1	rbn
rcdA	886646	887182	forward	1	rcdA
rclR	319451	320305	forward	1	rclR
rcsA	2021992	2022615	forward	1	rcsA
rdlA	1268546	1268612	forward	1	rdlA
rdlB	1269081	1269146	forward	1	rdlB
rdlC	1269616	1269683	forward	1	rdlC
rdlD	3698159	3698222	forward	1	rdlD
recN	2749817	2751478	forward	1	recN
recQ	4003887	4005716	forward	1	recQ
rep	3958700	3960721	forward	1	rep
rhlE	830095	831459	forward	1	rhlE
rhsB	3617215	3621450	forward	1	rhsB
rhtC	4005780	4006400	forward	1	rhtC
rihC	27293	28207	forward	1	rihC
rimJ	1124785	1125369	forward	1	rimJ
rimL	1496962	1497501	forward	1	rimL
rlmF	841555	842481	forward	1	rlmF
rlmJ	3643408	3644250	forward	1	rlmJ
rluB	1324876	1325751	forward	1	rluB
rluC	1144163	1145122	forward	1	rluC
rluF	4228377	4229249	forward	1	rluF
rmf	1014938	1015105	forward	1	rmf
rmuC	4015356	4016783	forward	1	rmuC
rpiB	4311373	4311822	forward	1	rpiB
rplY	2280539	2280823	forward	1	rplY
rpmE	4125036	4125248	forward	1	rpmE
rprA	1768396	1768500	forward	1	rprA
rraB	4476496	4476912	forward	1	rraB
rseP	196546	197898	forward	1	rseP
rseX	2031673	2031763	forward	1	rseX
rsmB	3433229	3434518	forward	1	rsmB
rsmF	1918247	1919686	forward	1	rsmF
rtcR	3556290	3557888	forward	1	rtcR
rutR	1073465	1074103	forward	1	rutR
ryeA	1921090	1921338	forward	1	ryeA
ryfA	2651877	2652180	forward	1	ryfA
ryjB	4526000	4526089	forward	1	ryjB
rzoD	577550	577732	forward	1	rzoD
rzoR	1421424	1421609	forward	1	rzoR
sbcB	2080780	2082207	forward	1	sbcB
sbp	4106857	4107846	forward	1	sbp
sdaA	1894956	1896320	forward	1	sdaA
selC	3834245	3834339	forward	1	selC
serS	938651	939943	forward	1	serS
setB	2261885	2263066	forward	1	setB
setC	3834976	3836160	forward	1	setC
sfmA	557435	557977	forward	1	sfmA
sfsB	3332931	3333209	forward	1	sfsB
shiA	2051667	2052983	forward	1	shiA
sibA	2151335	2151478	forward	1	sibA
sibB	2151670	2151805	forward	1	sibB
sibC	3054873	3055013	forward	1	sibC
sieB	1416695	1417183	forward	1	sieB
slt	4628756	4630693	forward	1	slt
slyB	1717900	1718367	forward	1	slyB
slyX	3475662	3475880	forward	1	slyX
smpB	2752918	2753400	forward	1	smpB
smrA	1404003	1404566	forward	1	smrA
smrB	2446628	2447179	forward	1	smrB
sodA	4098833	4099453	forward	1	sodA
sodB	1733402	1733983	forward	1	sodB
sohB	1327356	1328405	forward	1	sohB
sokB	1490143	1490198	forward	1	sokB
sokC	16952	17006	forward	1	sokC
soxR	4275492	4275956	forward	1	soxR
spf	4047922	4048030	forward	1	spf
sppA	1846861	1848717	forward	1	sppA
sraB	1145812	1145980	forward	1	sraB
srmB	2710918	2712252	forward	1	srmB
ssb	4272148	4272684	forward	1	ssb
sseA	2650516	2651361	forward	1	sseA
ssrA	2753615	2753977	forward	1	ssrA
sstT	3237966	3239210	forward	1	sstT
sugE	4374898	4375215	forward	1	sugE
suhB	2661464	2662267	forward	1	suhB
sutR	1504196	1504732	forward	1	sutR
sxy	1020361	1020990	forward	1	sxy
symR	4577858	4577934	forward	1	symR
tabA	4472885	4473337	forward	1	tabA
talB	8238	9191	forward	1	talB
tas	2969619	2970659	forward	1	tas
tatE	658170	658373	forward	1	tatE
tcyP	1808958	1810349	forward	1	tcyP
tdcR	3265402	3265620	forward	1	tdcR
tdk	1292750	1293367	forward	1	tdk
tfaD	580757	581320	forward	1	tfaD
tfaS	2468825	2469127	forward	1	tfaS
tfaX	582098	582283	forward	1	tfaX
thiI	440773	442221	forward	1	thiI
thrW	262095	262170	forward	1	thrW
tig	454357	455655	forward	1	tig
tilS	212331	213629	forward	1	tilS
tisB	3851576	3851665	forward	1	tisB
tonB	1309113	1309832	forward	1	tonB
topA	1329072	1331669	forward	1	topA
torI	2474332	2474532	forward	1	torI
torT	1055484	1056512	forward	1	torT
tqsA	1671937	1672971	forward	1	tqsA
treF	3667615	3669264	forward	1	treF
trg	1490494	1492134	forward	1	trg
trkA	3434540	3435916	forward	1	trkA
trkG	1421806	1423263	forward	1	trkG
trmL	3779238	3779711	forward	1	trmL
trpR	4630783	4631109	forward	1	trpR
trpT	3944980	3945055	forward	1	trpT
trxA	3963784	3964113	forward	1	trxA
trxC	2716757	2717176	forward	1	trxC
tsgA	3490590	3491771	forward	1	tsgA
tsr	4589680	4591335	forward	1	tsr
tus	1682283	1683212	forward	1	tus
typA	4056430	4058253	forward	1	typA
tyrB	4265137	4266330	forward	1	tyrB
tyrP	1987705	1988916	forward	1	tyrP
uacT	3029389	3030837	forward	1	uacT
ubiD	4023011	4024504	forward	1	ubiD
ubiF	694324	695499	forward	1	ubiF
ubiG	2337589	2338311	forward	1	ubiG
udp	4014454	4015215	forward	1	udp
ung	2714776	2715465	forward	1	ung
ushA	504138	505790	forward	1	ushA
uspA	3638134	3638568	forward	1	uspA
uspC	1977777	1978205	forward	1	uspC
uvrB	812749	814770	forward	1	uvrB
uvrD	3996006	3998168	forward	1	uvrD
uxuR	4552599	4553372	forward	1	uxuR
wecH	3723910	3724905	forward	1	wecH
xanP	3826968	3828359	forward	1	xanP
xseA	2632254	2633624	forward	1	xseA
xthA	1830452	1831258	forward	1	xthA
yaaU	45807	47138	forward	1	yaaU
yaaX	5234	5530	forward	1	yaaX
yabI	71351	72115	forward	1	yabI
yacL	134388	134750	forward	1	yacL
yadD	146968	147870	forward	1	yadD
yadE	145081	146310	forward	1	yadE
yadI	144577	145017	forward	1	yadI
yaeR	211877	212266	forward	1	yaeR
yafF	239190	239378	forward	1	yafF
yafJ	244327	245094	forward	1	yafJ
yafL	246712	247461	forward	1	yafL
yafS	234816	235538	forward	1	yafS
yafT	237335	238120	forward	1	yafT
yagJ	290724	291455	forward	1	yagJ
yagU	302215	302829	forward	1	yagU
yahH	339017	339313	forward	1	yahH
yahK	342108	343157	forward	1	yahK
yahL	343400	344215	forward	1	yahL
yahM	344628	344873	forward	1	yahM
yahO	345708	345983	forward	1	yahO
yaiE	407401	407685	forward	1	yaiE
yaiI	404988	405446	forward	1	yaiI
yaiL	375996	376535	forward	1	yaiL
yaiT	389475	390935	forward	1	yaiT
yaiU	392239	393642	forward	1	yaiU
yaiV	393685	394353	forward	1	yaiV
yaiZ	398817	399029	forward	1	yaiZ
yajD	429829	430176	forward	1	yajD
yajQ	443907	444398	forward	1	yajQ
ybaA	475896	476249	forward	1	ybaA
ybaN	490106	490483	forward	1	ybaN
ybaO	467607	468065	forward	1	ybaO
ybaQ	507442	507783	forward	1	ybaQ
ybaV	463161	463532	forward	1	ybaV
ybaY	474603	475175	forward	1	ybaY
ybcD	565674	565910	forward	1	ybcD
ybcK	568125	569651	forward	1	ybcK
ybcQ	573179	573562	forward	1	ybcQ
ybcW	579103	579309	forward	1	ybcW
ybdD	631405	631602	forward	1	ybdD
ybdL	632809	633969	forward	1	ybdL
ybdR	641311	642549	forward	1	ybdR
ybeL	674241	674723	forward	1	ybeL
ybfA	728357	728563	forward	1	ybfA
ybfD	737315	738076	forward	1	ybfD
ybfL	736123	737184	forward	1	ybfL
ybfP	714635	715129	forward	1	ybfP
ybfQ	735668	735922	forward	1	ybfQ
ybhH	799982	801034	forward	1	ybhH
ybhI	801110	802543	forward	1	ybhI
ybhJ	802726	804987	forward	1	ybhJ
ybhL	819107	819811	forward	1	ybhL
ybhM	820016	820729	forward	1	ybhM
ybhQ	823853	824263	forward	1	ybhQ
ybiB	834471	835433	forward	1	ybiB
ybiC	835574	836659	forward	1	ybiC
ybiT	855186	856778	forward	1	ybiT
ybjD	915696	917354	forward	1	ybjD
ybjM	889312	889689	forward	1	ybjM
ycaD	945094	946242	forward	1	ycaD
ycaK	948891	949481	forward	1	ycaK
ycaL	959487	960251	forward	1	ycaL
ycaM	946452	947882	forward	1	ycaM
ycaP	955985	956677	forward	1	ycaP
ycbJ	970975	971868	forward	1	ycbJ
yccE	1063259	1064515	forward	1	yccE
yccU	1027169	1027582	forward	1	yccU
yccX	1029287	1029565	forward	1	yccX
ycdZ	1099519	1100010	forward	1	ycdZ
yceA	1116030	1117082	forward	1	yceA
yceH	1125380	1126027	forward	1	yceH
yceK	1112802	1113029	forward	1	yceK
yceM	1126029	1126952	forward	1	yceM
yceQ	1143725	1144045	forward	1	yceQ
ycfJ	1166822	1167361	forward	1	ycfJ
ycgH_1	1220024	1220344	forward	1	ycgH_1
ycgH_2	1220429	1221445	forward	1	ycgH_2
ycgJ	1225823	1226191	forward	1	ycgJ
ycgL	1226904	1227230	forward	1	ycgL
ycgM	1227302	1227961	forward	1	ycgM
ycgN	1228053	1228499	forward	1	ycgN
ycgY	1244383	1244823	forward	1	ycgY
ychE	1297821	1298468	forward	1	ychE
ychH	1258014	1258292	forward	1	ychH
ychO	1273148	1274401	forward	1	ychO
ychS	1285932	1286207	forward	1	ychS
yciY	1306812	1306985	forward	1	yciY
ycjG	1386954	1387919	forward	1	ycjG
ydaN	1406074	1407057	forward	1	ydaN
ydbA_1	1463416	1465974	forward	1	ydbA_1
ydbA_2	1468714	1472037	forward	1	ydbA_2
ydbC	1472245	1473105	forward	1	ydbC
ydbD	1473168	1475474	forward	1	ydbD
ydbJ	1439082	1439348	forward	1	ydbJ
ydcA	1489701	1489874	forward	1	ydcA
ydcC	1529840	1530976	forward	1	ydcC
ydcF	1485259	1486059	forward	1	ydcF
ydcH	1496675	1496899	forward	1	ydcH
ydcJ	1493312	1494655	forward	1	ydcJ
ydcL	1500481	1501149	forward	1	ydcL
ydcM	1501681	1502889	forward	1	ydcM
ydcP	1504805	1506766	forward	1	ydcP
ydcR	1508027	1509433	forward	1	ydcR
ydcY	1515672	1515905	forward	1	ydcY
ydeA	1615052	1616242	forward	1	ydeA
ydeE	1619356	1620543	forward	1	ydeE
ydeJ	1622797	1623315	forward	1	ydeJ
ydfG	1625541	1626287	forward	1	ydfG
ydfH	1626376	1627062	forward	1	ydfH
ydfK	1631096	1631329	forward	1	ydfK
ydfV	1643921	1644226	forward	1	ydfV
ydfZ	1627239	1627442	forward	1	ydfZ
ydgA	1687876	1689384	forward	1	ydgA
ydgD	1669984	1670805	forward	1	ydgD
ydgH	1676451	1677395	forward	1	ydgH
ydhC	1737935	1739146	forward	1	ydhC
ydhR	1744724	1745029	forward	1	ydhR
ydhS	1745155	1746759	forward	1	ydhS
ydiE	1787637	1787828	forward	1	ydiE
ydiK	1767098	1768210	forward	1	ydiK
ydiL	1768639	1768995	forward	1	ydiL
ydiM	1769095	1770309	forward	1	ydiM
ydiZ	1805424	1805714	forward	1	ydiZ
ydjM	1808235	1808825	forward	1	ydjM
yeaK	1871598	1872101	forward	1	yeaK
yeaL	1872376	1872822	forward	1	yeaL
yeaO	1874933	1875280	forward	1	yeaO
yeaX	1883869	1884834	forward	1	yeaX
yebB	1944275	1944877	forward	1	yebB
yebK	1934676	1935545	forward	1	yebK
yebQ	1908300	1909673	forward	1	yebQ
yebV	1919804	1920040	forward	1	yebV
yebW	1920145	1920336	forward	1	yebW
yecF	1993842	1994066	forward	1	yecF
yecR	1986246	1986569	forward	1	yecR
yecT	1959996	1960484	forward	1	yecT
yedA	2027563	2028483	forward	1	yedA
yedK	2007845	2008513	forward	1	yedK
yedL	2008624	2009103	forward	1	yedL
yedP	2023535	2024350	forward	1	yedP
yedS_3	2032863	2033267	forward	1	yedS_3
yedX	2036980	2037393	forward	1	yedX
yeeJ	2042935	2050038	forward	1	yeeJ
yeeN	2054882	2055598	forward	1	yeeN
yeeP	2068810	2069235	forward	1	yeeP
yegD	2145698	2147050	forward	1	yegD
yegH	2135926	2137509	forward	1	yegH
yegJ	2149209	2149670	forward	1	yegJ
yegP	2163213	2163545	forward	1	yegP
yegQ	2163692	2165053	forward	1	yegQ
yegS	2166736	2167635	forward	1	yegS
yehK	2201994	2202311	forward	1	yehK
yehR	2209247	2209708	forward	1	yehR
yeiG	2241932	2242768	forward	1	yeiG
yeiH	2247739	2248788	forward	1	yeiH
yeiI	2249722	2250810	forward	1	yeiI
yeiL	2253377	2254036	forward	1	yeiL
yeiP	2263472	2264044	forward	1	yeiP
yeiQ	2264267	2265733	forward	1	yeiQ
yfaH	2347709	2347915	forward	1	yfaH
yfbL	2383882	2384853	forward	1	yfbL
yfbM	2384956	2385459	forward	1	yfbM
yfbO	2386603	2387079	forward	1	yfbO
yfbP	2387138	2387986	forward	1	yfbP
yfcC	2415103	2416623	forward	1	yfcC
yfcG	2418643	2419290	forward	1	yfcG
yfdC	2463323	2464255	forward	1	yfdC
yfdF	2461034	2462092	forward	1	yfdF
yfeH	2524968	2525966	forward	1	yfeH
yfeN	2523149	2523913	forward	1	yfeN
yfeO	2507652	2508908	forward	1	yfeO
yffL	2558279	2558920	forward	1	yffL
yffS	2562515	2563354	forward	1	yffS
yfgG	2627312	2627503	forward	1	yfgG
yfhH	2696781	2697629	forward	1	yfhH
yfhL	2697685	2697945	forward	1	yfhL
yfhR	2662385	2663266	forward	1	yfhR
yfiL	2739382	2739747	forward	1	yfiL
yfiM	2722201	2722473	forward	1	yfiM
yfjD	2746796	2748082	forward	1	yfjD
yfjI	2757007	2758416	forward	1	yfjI
yfjJ	2758569	2759195	forward	1	yfjJ
yfjW	2771340	2773043	forward	1	yfjW
ygaM	2798168	2798497	forward	1	ygaM
ygaQ_3	2785664	2786260	forward	1	ygaQ_3
ygaQ_4	2786399	2786671	forward	1	ygaQ_4
ygbN	2863123	2864487	forward	1	ygbN
ygcG	2903733	2904605	forward	1	ygcG
ygdG	2928987	2929832	forward	1	ygdG
ygdH	2924330	2925694	forward	1	ygdH
ygdQ	2968442	2969155	forward	1	ygdQ
ygdR	2969293	2969511	forward	1	ygdR
ygeF	2988576	2989022	forward	1	ygeF
ygeG	2989290	2989781	forward	1	ygeG
ygeH	2990116	2991492	forward	1	ygeH
ygeI	2991660	2991878	forward	1	ygeI
ygeW	3004284	3005474	forward	1	ygeW
ygeX	3005532	3006728	forward	1	ygeX
ygeY	3006786	3007997	forward	1	ygeY
ygfZ	3039335	3040315	forward	1	ygfZ
yggI	3087777	3088274	forward	1	yggI
yghA	3147684	3148568	forward	1	yghA
yghB	3151585	3152244	forward	1	yghB
yghT	3132153	3132845	forward	1	yghT
yghU	3136749	3137615	forward	1	yghU
yghZ	3145919	3146959	forward	1	yghZ
ygiH	3202716	3203333	forward	1	ygiH
ygiL	3183436	3183987	forward	1	ygiL
ygiN	3171164	3171478	forward	1	ygiN
ygjI	3224256	3225689	forward	1	ygjI
ygjP	3233982	3234485	forward	1	ygjP
ygjQ	3234562	3235254	forward	1	ygjQ
ygjR	3235315	3236319	forward	1	ygjR
yhaH	3250326	3250691	forward	1	yhaH
yhaI	3250933	3251289	forward	1	yhaI
yhbO	3296996	3297514	forward	1	yhbO
yhbQ	3297988	3298290	forward	1	yhbQ
yhbW	3301470	3302477	forward	1	yhbW
yhbY	3325812	3326105	forward	1	yhbY
yhcB	3378213	3378611	forward	1	yhcB
yhcG	3365849	3366976	forward	1	yhcG
yhcN	3383560	3383823	forward	1	yhcN
yhdH	3401506	3402480	forward	1	yhdH
yhdJ	3409675	3410559	forward	1	yhdJ
yhdU	3410643	3410822	forward	1	yhdU
yhdV	3416412	3416633	forward	1	yhdV
yhfK	3484813	3486915	forward	1	yhfK
yhfL	3497470	3497637	forward	1	yhfL
yhgA	3541189	3542067	forward	1	yhgA
yhgF	3535407	3537728	forward	1	yhgF
yhgN	3573094	3573687	forward	1	yhgN
yhhA	3584966	3585406	forward	1	yhhA
yhhH	3621422	3621805	forward	1	yhhH
yhhI	3622401	3623537	forward	1	yhhI
yhhN	3603774	3604400	forward	1	yhhN
yhhQ	3607240	3607905	forward	1	yhhQ
yhhT	3609888	3610937	forward	1	yhhT
yhhY	3579161	3579649	forward	1	yhhY
yhiM	3632864	3633916	forward	1	yhiM
yhiS_1	3649314	3650096	forward	1	yhiS_1
yhjC	3670365	3671336	forward	1	yhjC
yhjD	3671385	3672398	forward	1	yhjD
yhjE	3672809	3674131	forward	1	yhjE
yhjV	3698586	3699857	forward	1	yhjV
yiaD	3714570	3715229	forward	1	yiaD
yiaG	3717501	3717791	forward	1	yiaG
yiaU	3750015	3750989	forward	1	yiaU
yibG	3766200	3766661	forward	1	yibG
yibJ	3765244	3765945	forward	1	yibJ
yibL	3774688	3775050	forward	1	yibL
yicC	3814699	3815562	forward	1	yicC
yicG	3816897	3817514	forward	1	yicG
yicH	3828480	3830189	forward	1	yicH
yicL	3836271	3837194	forward	1	yicL
yicS	3838238	3838531	forward	1	yicS
yidI	3854438	3854887	forward	1	yidI
yidL	3858276	3859199	forward	1	yidL
yidP	3861922	3862638	forward	1	yidP
yidQ	3865751	3866083	forward	1	yidQ
yidX	3873461	3874117	forward	1	yidX
yidZ	3890788	3891747	forward	1	yidZ
yieH	3894797	3895462	forward	1	yieH
yifE	3946109	3946447	forward	1	yifE
yifK	3978910	3980295	forward	1	yifK
yigM	4009099	4009998	forward	1	yigM
yihD	4040092	4040361	forward	1	yihD
yihF	4042222	4043652	forward	1	yihF
yihI	4049370	4049879	forward	1	yihI
yihN	4060270	4061535	forward	1	yihN
yiiE	4077314	4077532	forward	1	yiiE
yiiF	4077774	4077992	forward	1	yiiF
yiiG	4085025	4086080	forward	1	yiiG
yiiM	4100845	4101519	forward	1	yiiM
yiiR	4110338	4110778	forward	1	yiiR
yijE	4134131	4135036	forward	1	yijE
yjaA	4211257	4211640	forward	1	yjaA
yjaG	4197527	4198117	forward	1	yjaG
yjaH	4198589	4199284	forward	1	yjaH
yjaZ	4187809	4188348	forward	1	yjaZ
yjbB	4225754	4227385	forward	1	yjbB
yjbI	4248978	4250306	forward	1	yjbI
yjbJ	4257260	4257469	forward	1	yjbJ
yjcE	4278003	4279652	forward	1	yjcE
yjdP	4311891	4312220	forward	1	yjdP
yjeI	4370832	4371185	forward	1	yjeI
yjeM	4381862	4383364	forward	1	yjeM
yjeT	4402409	4402606	forward	1	yjeT
yjeV	4390915	4390968	forward	1	yjeV
yjfP	4414975	4415724	forward	1	yjfP
yjgL	4473460	4475274	forward	1	yjgL
yjgN	4477753	4478949	forward	1	yjgN
yjgW	4497622	4497957	forward	1	yjgW
yjgZ	4499283	4499612	forward	1	yjgZ
yjhE	4504884	4505132	forward	1	yjhE
yjhR	4533038	4534054	forward	1	yjhR
yjiS	4569774	4569938	forward	1	yjiS
yjiT	4570437	4571954	forward	1	yjiT
yjiV	4572158	4574878	forward	1	yjiV
yjjJ	4619792	4621123	forward	1	yjjJ
yjjY	4638425	4638565	forward	1	yjjY
yjjZ	4603827	4604063	forward	1	yjjZ
yjtD	4638965	4639651	forward	1	yjtD
ykfC	272071	273216	forward	1	ykfC
ykgL	311336	311563	forward	1	ykgL
ykiA	407833	408174	forward	1	ykiA
yliI	877965	879080	forward	1	yliI
ymbA	1014134	1014682	forward	1	ymbA
ymdA	1104637	1104948	forward	1	ymdA
ymdF	1067304	1067477	forward	1	ymdF
ymfI	1200720	1201061	forward	1	ymfI
ymgE	1243951	1244205	forward	1	ymgE
ymgF	1218206	1218424	forward	1	ymgF
ynaJ	1395389	1395646	forward	1	ynaJ
yncE	1521331	1522392	forward	1	yncE
yncG	1524271	1524888	forward	1	yncG
yncH	1524964	1525176	forward	1	yncH
yncI	1528610	1529356	forward	1	yncI
yncM	1529400	1529600	forward	1	yncM
yneJ	1612828	1613709	forward	1	yneJ
yneK	1613787	1614902	forward	1	yneK
yneM	1620670	1620765	forward	1	yneM
ynfD	1655589	1655894	forward	1	ynfD
ynfM	1667723	1668976	forward	1	ynfM
yniA	1805820	1806680	forward	1	yniA
yniC	1807404	1808072	forward	1	yniC
yniD	1803189	1803296	forward	1	yniD
ynjE	1837491	1838798	forward	1	ynjE
yoaB	1891391	1891735	forward	1	yoaB
yoaC	1892097	1892456	forward	1	yoaC
yobD	1902825	1903283	forward	1	yobD
yobH	1906949	1907188	forward	1	yobH
yodB	2040392	2040922	forward	1	yodB
yodD	2023010	2023237	forward	1	yodD
yoeA	2066659	2067051	forward	1	yoeA
yoeE	2068268	2068528	forward	1	yoeE
yoeF	2076599	2076955	forward	1	yoeF
yohD	2223823	2224401	forward	1	yohD
yohO	2213679	2213786	forward	1	yohO
ypdI	2492720	2492995	forward	1	ypdI
ypdJ	2474116	2474256	forward	1	ypdJ
ypeC	2509023	2509349	forward	1	ypeC
yphA	2671296	2671790	forward	1	yphA
yphH	2680885	2682078	forward	1	yphH
ypjD	2745909	2746775	forward	1	ypjD
yqeA	3009483	3010415	forward	1	yqeA
yqeG	2983869	2985098	forward	1	yqeG
yqeH	2985558	2986190	forward	1	yqeH
yqgA	3107575	3108282	forward	1	yqgA
yqgC	3084209	3084424	forward	1	yqgC
yqhG	3155672	3156598	forward	1	yqhG
yqhH	3156649	3156906	forward	1	yqhH
yqiC	3182862	3183152	forward	1	yqiC
yqjF	3248584	3248976	forward	1	yqjF
yqjG	3249046	3250032	forward	1	yqjG
yqjI	3214801	3215424	forward	1	yqjI
yraH	3285448	3286032	forward	1	yraH
yraN	3293416	3293811	forward	1	yraN
yraP	3294431	3295006	forward	1	yraP
yrbL	3346474	3347106	forward	1	yrbL
yrdA	3427258	3427812	forward	1	yrdA
yrfF	3524491	3526626	forward	1	yrfF
yrhB	3582782	3583066	forward	1	yrhB
yrhC	3621910	3622155	forward	1	yrhC
ytfA	4425792	4426118	forward	1	ytfA
ytfH	4432136	4432516	forward	1	ytfH
ytfI	4435730	4436668	forward	1	ytfI
ytfK	4437610	4437816	forward	1	ytfK
ytjA	4610133	4610312	forward	1	ytjA
ytjC	4631820	4632467	forward	1	ytjC
yzcX	3991873	3992358	forward	1	yzcX
zapA	3053634	3053963	forward	1	zapA
zapB	4116538	4116783	forward	1	zapB
zapC	1005175	1005717	forward	1	zapC
zinT	2039399	2040049	forward	1	zinT
zntA	3604474	3606672	forward	1	zntA
zupT	3180572	3181345	forward	1	zupT
accBC	3403458	3405288	forward	2	accB	accC
ackA-pta	2411492	2414913	forward	2	ackA	pta
acrEF	3411886	3416159	forward	2	acrE	acrF
ahpCF	638168	640541	forward	2	ahpC	ahpF
alaA-yfbR	2405583	2407483	forward	2	alaA	yfbR
amiA-hemF	2550374	2552146	forward	2	amiA	hemF
ampDE	118733	120135	forward	2	ampD	ampE
ansA-pncA	1848884	1850552	forward	2	ansA	pncA
arpB_1B_2	1801118	1803017	forward	2	arpB_1	arpB_2
ascFB	2837546	2840436	forward	2	ascF	ascB
atoSC	2318065	2321273	forward	2	atoS	atoC
bepA-yfgD	2614116	2615959	forward	2	bepA	yfgD
brnQ-proY	418815	421583	forward	2	brnQ	proY
btuB-murI	4161662	4164308	forward	2	btuB	murI
carAB	29651	34038	forward	2	carA	carB
cbrBC	3895529	3896632	forward	2	cbrB	cbrC
chaBC	1271342	1272425	forward	2	chaB	chaC
chiP-ybfN	707557	709339	forward	2	chiP	ybfN
chpSB	4446470	4447065	forward	2	chpS	chpB
codBA	354146	356678	forward	2	codB	codA
crfC-yjcZ	4325158	4328261	forward	2	crfC	yjcZ
csdAE	2941359	2943007	forward	2	csdA	csdE
cydAB	770681	773404	forward	2	cydA	cydB
cydX-ybgE	773419	773825	forward	2	cydX	ybgE
dadAX	1236794	1239172	forward	2	dadA	dadX
def-fmt	3431712	3433183	forward	2	def	fmt
degQS	3378765	3381289	forward	2	degQ	degS
dpiBA	651458	653765	forward	2	dpiB	dpiA
dsdXA	2475869	2478552	forward	2	dsdX	dsdA
dusB-fis	3408302	3409589	forward	2	dusB	fis
dut-slmA	3811955	3813113	forward	2	dut	slmA
ebgAC	3220655	3224193	forward	2	ebgA	ebgC
ecnAB	4374340	4374722	forward	2	ecnA	ecnB
efeOB	1081466	1083870	forward	2	efeO	efeB
efeU_1U_2	1080579	1081408	forward	2	efeU_1	efeU_2
evgAS	2481777	2485989	forward	2	evgA	evgS
fabR-yijD	4159090	4160153	forward	2	fabR	yijD
fetAB	515143	516586	forward	2	fetA	fetB
flgKL	1137601	1140209	forward	2	flgK	flgL
folX-yfcH	2419347	2420623	forward	2	folX	yfcH
frwCB	4140553	4141967	forward	2	frwC	frwB
gapA-yeaD	1860795	1862758	forward	2	gapA	yeaD
ghoST	4350607	4351104	forward	2	ghoS	ghoT
glnK-amtB	471822	473476	forward	2	glnK	amtB
gntX-nfuA	3542904	3544221	forward	2	gntX	nfuA
groSL	4368711	4370694	forward	2	groS	groL
hicAB	1507310	1507948	forward	2	hicA	hicB
ilvIH	85630	87848	forward	2	ilvI	ilvH
insB-7_1B-7_2	4516744	4517247	forward	2	insB-7_1	insB-7_2
isrC-flu	2069341	2072682	forward	2	isrC	flu
kefFC	47246	49631	forward	2	kefF	kefC
lexA-dinF	4255138	4257144	forward	2	lexA	dinF
lolA-rarA	936592	938560	forward	2	lolA	rarA
lptFG	4484241	4486423	forward	2	lptF	lptG
macAB	918458	921516	forward	2	macA	macB
malXY	1697379	1700153	forward	2	malX	malY
mdlAB	468095	471641	forward	2	mdlA	mdlB
melAB	4339934	4342813	forward	2	melA	melB
metBL	4126695	4130290	forward	2	metB	metL
mgtLA	4465454	4468344	forward	2	mgtL	mgtA
mmuPM	274549	276871	forward	2	mmuP	mmuM
mngAB	765207	769834	forward	2	mngA	mngB
mntR-ybiR	852406	853988	forward	2	mntR	ybiR
molR_3-yehI	2197344	2201933	forward	2	molR_3	yehI
murB-birA	4170080	4172070	forward	2	murB	birA
nadA-pnuC	781308	783108	forward	2	nadA	pnuC
nagK-cobB	1177816	1179582	forward	2	nagK	cobB
nhaAR	17489	19620	forward	2	nhaA	nhaR
norVW	2830498	2833067	forward	2	norV	norW
opgGH	1108558	1112629	forward	2	opgG	opgH
paaXY	1461563	1463085	forward	2	paaX	paaY
pabB-nudL	1892829	1894772	forward	2	pabB	nudL
pdeI-dgcI	872202	875886	forward	2	pdeI	dgcI
pflDC	4142018	4145159	forward	2	pflD	pflC
pheLA	2735621	2736927	forward	2	pheL	pheA
phoA-psiF	400971	402825	forward	2	phoA	psiF
phoBR	416366	418408	forward	2	phoB	phoR
pldB-yigL	4007193	4009023	forward	2	pldB	yigL
ppk-ppx	2621066	2624678	forward	2	ppk	ppx
pqiAB	1011224	1014122	forward	2	pqiA	pqiB
preTA	2232055	2234522	forward	2	preT	preA
prlF-yhaV	3275024	3275823	forward	2	prlF	yhaV
proBA	259612	261980	forward	2	proB	proA
purMN	2619219	2620894	forward	2	purM	purN
qseBC	3167850	3169855	forward	2	qseB	qseC
rcnAB	2183939	2185320	forward	2	rcnA	rcnB
rcsDB	2311510	2314849	forward	2	rcsD	rcsB
rdoA-dsbA	4040438	4042067	forward	2	rdoA	dsbA
renD-emrE	567285	567870	forward	2	renD	emrE
rhaSR	4095759	4097517	forward	2	rhaS	rhaR
rhoL-rho	3964254	3965699	forward	2	rhoL	rho
rhsA-yibA	3760206	3765202	forward	2	rhsA	yibA
rhsC-ybfB	728806	733325	forward	2	rhsC	ybfB
rhsE-ydcD	1525914	1528428	forward	2	rhsE	ydcD
rlmL-uup	1007067	1011094	forward	2	rlmL	uup
rnlAB	2763940	2765377	forward	2	rnlA	rnlB
rnt-lhr	1726371	1731727	forward	2	rnt	lhr
rpmH-rnpA	3882359	3882875	forward	2	rpmH	rnpA
rsmD-yhhL	3602416	3603271	forward	2	rsmD	yhhL
rsmE-gshB	3089156	3090850	forward	2	rsmE	gshB
rssAB	1288429	1290478	forward	2	rssA	rssB
rstAB	1680174	1682207	forward	2	rstA	rstB
sanA-yeiS	2230900	2231861	forward	2	sanA	yeiS
sbmA-yaiW	395863	398190	forward	2	sbmA	yaiW
sdaCB	2926251	2928965	forward	2	sdaC	sdaB
secE-nusG	4175381	4176311	forward	2	secE	nusG
seqA-pgm	712210	714421	forward	2	seqA	pgm
serC-aroA	956876	959318	forward	2	serC	aroA
sfmCD	558197	561523	forward	2	sfmC	sfmD
sfmHF	561565	563068	forward	2	sfmH	sfmF
slp-dctR	3651984	3653236	forward	2	slp	dctR
ssrS-fau	3054005	3054811	forward	2	ssrS	fau
tag-yiaC	3711115	3712115	forward	2	tag	yiaC
talA-tktB	2576688	2579661	forward	2	talA	tktB
tehAB	1498597	1500179	forward	2	tehA	tehB
ubiCA	4250529	4251911	forward	2	ubiC	ubiA
umuDC	1229990	1231677	forward	2	umuD	umuC
uxuAB	4549659	4552384	forward	2	uxuA	uxuB
valVW	1744459	1744616	forward	2	valV	valW
valZ-lysY	780291	780445	forward	2	valZ	lysY
waaA-coaD	3806563	3808327	forward	2	waaA	coaD
yabPQ	58474	59279	forward	2	yabP	yabQ
yadGH	142779	144472	forward	2	yadG	yadH
yafDE	231122	232549	forward	2	yafD	yafE
yagEF	281502	284392	forward	2	yagE	yagF
yagGH	284619	287623	forward	2	yagG	yagH
yahIJ	339389	341731	forward	2	yahI	yahJ
ybaB-recR	493300	494234	forward	2	ybaB	recR
ybaST	510865	513092	forward	2	ybaS	ybaT
ybbAP	518957	522054	forward	2	ybbA	ybbP
ybcLM	570116	571474	forward	2	ybcL	ybcM
ybeM_1M_2	657254	658041	forward	2	ybeM_1	ybeM_2
ybeR-djlB	675934	678065	forward	2	ybeR	djlB
ybeU-djlC	678731	680886	forward	2	ybeU	djlC
ybfOC	733443	735442	forward	2	ybfO	ybfC
ybgA-phr	738224	740148	forward	2	ybgA	phr
ybjO-rlmC	897212	898868	forward	2	ybjO	rlmC
ybjQ-amiD	903816	904966	forward	2	ybjQ	amiD
ycaR-kdsB	969896	970821	forward	2	ycaR	kdsB
ycbK-gloC	982298	983520	forward	2	ycbK	gloC
ycdXY	1098102	1099417	forward	2	ycdX	ycdY
ychE_2-yhcF	3364703	3365664	forward	2	ychE_2	yhcF
ydgI-folM	1677581	1679722	forward	2	ydgI	folM
ydiFO	1773611	1776371	forward	2	ydiF	ydiO
yeaGH	1864932	1868262	forward	2	yeaG	yeaH
yeaVW	1881212	1883813	forward	2	yeaV	yeaW
yebST	1914282	1918167	forward	2	yebS	yebT
yecDE	1948856	1950237	forward	2	yecD	yecE
yedEF	2006301	2007736	forward	2	yedE	yedF
yedS_1S_2	2032075	2032779	forward	2	yedS_1	yedS_2
yedYZ	2037502	2039142	forward	2	yedY	yedZ
yeiR-lpxT	2265851	2267589	forward	2	yeiR	lpxT
yejLM	2282151	2284158	forward	2	yejL	yejM
yfaD-ypaA	2354926	2356023	forward	2	yfaD	ypaA
yfdPQ	2471542	2472878	forward	2	yfdP	yfdQ
yfeCD	2516489	2517227	forward	2	yfeC	yfeD
yfeKS	2535364	2536505	forward	2	yfeK	yfeS
yffMN	2559390	2560015	forward	2	yffM	yffN
yffOP	2560133	2561139	forward	2	yffO	yffP
yffQR	2561599	2562394	forward	2	yffQ	yffR
yfgHI	2627814	2628887	forward	2	yfgH	yfgI
yfiP-patZ	2717245	2720635	forward	2	yfiP	patZ
yfjPQ	2765732	2767508	forward	2	yfjP	yfjQ
ygaQ_1Q_2	2784419	2785456	forward	2	ygaQ_1	ygaQ_2
ygaVP	2795233	2796066	forward	2	ygaV	ygaP
ygaXY	2806338	2807515	forward	2	ygaX	ygaY
ygaZH	2807639	2808701	forward	2	ygaZ	ygaH
ygbJK	2859452	2861523	forward	2	ygbJ	ygbK
ygbLM	2861615	2863034	forward	2	ygbL	ygbM
ygfK-ssnA	3014082	3018511	forward	2	ygfK	ssnA
ygfM-xdhD	3018562	3022208	forward	2	ygfM	xdhD
ygiM-cca	3199229	3201151	forward	2	ygiM	cca
ygjJK	3225823	3229261	forward	2	ygjJ	ygjK
yhaBC	3265876	3267624	forward	2	yhaB	yhaC
yhaKL	3252341	3253229	forward	2	yhaK	yhaL
yhbUV	3299507	3301389	forward	2	yhbU	yhbV
yieEF	3891892	3893241	forward	2	yieE	yieF
yihLM	4058470	4060168	forward	2	yihL	yihM
yihVW	4071762	4073477	forward	2	yihV	yihW
yiiS-uspD	4110990	4111744	forward	2	yiiS	uspD
yjbLM	4258344	4259329	forward	2	yjbL	yjbM
yjbQR	4268261	4269037	forward	2	yjbQ	yjbR
yjdIJ	4349866	4350380	forward	2	yjdI	yjdJ
yjeNO	4383416	4384041	forward	2	yjeN	yjeO
yjhBC	4502081	4504428	forward	2	yjhB	yjhC
yjiPQ	4567021	4567941	forward	2	yjiP	yjiQ
yjjQ-bglJ	4601500	4602860	forward	2	yjjQ	bglJ
yjjUV	4610434	4612283	forward	2	yjjU	yjjV
ykfJ-prfH	253467	254202	forward	2	ykfJ	prfH
ymcE-gnsA	1051070	1051463	forward	2	ymcE	gnsA
ymdB-clsC	1105043	1106999	forward	2	ymdB	clsC
ymdE-ycdU	1094767	1096052	forward	2	ymdE	ycdU
ymgH-ycgI	1222688	1223130	forward	2	ymgH	ycgI
ymiA-yciX	1333148	1333482	forward	2	ymiA	yciX
ynaA-lomR_1	1424478	1425637	forward	2	ynaA	lomR_1
ynaK-ydaY	1423401	1424004	forward	2	ynaK	ydaY
ynfB-speG	1653832	1654768	forward	2	ynfB	speG
ynfO-ydfO	1634780	1635481	forward	2	ynfO	ydfO
yobB-exoX	1923464	1924806	forward	2	yobB	exoX
yohJK	2228646	2229736	forward	2	yohJ	yohK
yqcE-ygcE	2898614	2901396	forward	2	yqcE	ygcE
yqeIJ	2986524	2987808	forward	2	yqeI	yqeJ
yqgEF	3090959	3091938	forward	2	yqgE	yqgF
yqhD-dkgA	3153377	3155472	forward	2	yqhD	dkgA
yqiJK	3190230	3192547	forward	2	yqiJ	yqiK
yqjA-mzrA	3245795	3246844	forward	2	yqjA	mzrA
znuCB	1940686	1942223	forward	2	znuC	znuB
zraSR	4199949	4202668	forward	2	zraS	zraR
aceBAK	4213501	4218355	forward	3	aceB	aceA	aceK
argCBH	4153024	4156246	forward	3	argC	argB	argH
aroL-yaiA-aroM	405629	407329	forward	3	aroL	yaiA	aroM
arsRBC	3646551	3648685	forward	3	arsR	arsB	arsC
bcsEFG	3694481	3697916	forward	3	bcsE	bcsF	bcsG
clpPX-lon	455901	460466	forward	3	clpP	clpX	lon
cmk-rpsA-ihfB	960424	963335	forward	3	cmk	rpsA	ihfB
csgBAC	1103174	1104516	forward	3	csgB	csgA	csgC
cynTSX	358023	360370	forward	3	cynT	cynS	cynX
dmsABC	940182	944119	forward	3	dmsA	dmsB	dmsC
dnaK-tpke11-dnaJ	12163	15298	forward	3	dnaK	tpke11	dnaJ
essD-rrrD-rzpD	576621	577791	forward	3	essD	rrrD	rzpD
fdnGHI	1545425	1550015	forward	3	fdnG	fdnH	fdnI
feoABC	3538185	3540986	forward	3	feoA	feoB	feoC
fliDST	2001896	2004102	forward	3	fliD	fliS	fliT
gadE-mdtEF	3656389	3661550	forward	3	gadE	mdtE	mdtF
glpABC	2350669	2354733	forward	3	glpA	glpB	glpC
gltBDF	3352654	3359962	forward	3	gltB	gltD	gltF
glyVXY	4390383	4390681	forward	3	glyV	glyX	glyY
gpmM-envC-yibQ	3783283	3787083	forward	3	gpmM	envC	yibQ
hemA-prfA-prmC	1262937	1266150	forward	3	hemA	prfA	prmC
holD-rimI-yjjG	4605826	4607346	forward	3	holD	rimI	yjjG
insA-4AB-4B-4	1049056	1049753	forward	3	insA-4	insAB-4	insB-4
insC-1CD-1D-1	380530	381803	forward	3	insC-1	insCD-1	insD-1
insC-6CD-6D-6	4496250	4497523	forward	3	insC-6	insCD-6	insD-6
insE-3EF-3F-3	566056	567227	forward	3	insE-3	insEF-3	insF-3
insE-5EF-5F-5	2168251	2169422	forward	3	insE-5	insEF-5	insF-5
insN-1I-1O-1	269466	271479	forward	3	insN-1	insI-1	insO-1
insO-2-yjhWV	4506981	4508156	forward	3	insO-2	yjhW	yjhV
lldPRD	3775422	3779040	forward	3	lldP	lldR	lldD
lolCDE	1174650	1177787	forward	3	lolC	lolD	lolE
lomR_2-stfR-tfaR	1426838	1431010	forward	3	lomR_2	stfR	tfaR
lysT-valT-lysW	779777	780141	forward	3	lysT	valT	lysW
malK-lamB-malM	4244807	4248497	forward	3	malK	lamB	malM
manXYZ	1900072	1902770	forward	3	manX	manY	manZ
marRAB	1617144	1618231	forward	3	marR	marA	marB
metZWV	2945409	2945705	forward	3	metZ	metW	metV
modABC	794312	796835	forward	3	modA	modB	modC
mprA-emrAB	2808792	2812176	forward	3	mprA	emrA	emrB
mtlADR	3770304	3774182	forward	3	mtlA	mtlD	mtlR
murQP-yfeW	2543795	2547428	forward	3	murQ	murP	yfeW
nemRA-gloA	1724047	1726268	forward	3	nemR	nemA	gloA
nrdAB-yfaE	2342887	2346790	forward	3	nrdA	nrdB	yfaE
nudC-hemE-nfi	4194926	4197484	forward	3	nudC	hemE	nfi
proVWX	2802837	2806146	forward	3	proV	proW	proX
ptsHI-crr	2531786	2534365	forward	3	ptsH	ptsI	crr
rpsU-dnaG-rpoD	3208803	3212910	forward	3	rpsU	dnaG	rpoD
secMA-mutT	107705	111433	forward	3	secM	secA	mutT
serB-radA-nadR	4622918	4626570	forward	3	serB	radA	nadR
sgrST-setA	77367	78799	forward	3	sgrS	sgrT	setA
tamAB-ytfP	4440405	4446258	forward	3	tamA	tamB	ytfP
tff-rpsB-tsf	189712	191708	forward	3	tff	rpsB	tsf
tnaCAB	3886458	3889506	forward	3	tnaC	tnaA	tnaB
tolB-pal-cpoB	776963	779612	forward	3	tolB	pal	cpoB
torCAD	1057307	1061621	forward	3	torC	torA	torD
ttdABT	3204485	3207509	forward	3	ttdA	ttdB	ttdT
ubiEJB	4016878	4019889	forward	3	ubiE	ubiJ	ubiB
xanQ-guaD-ghxQ	3022373	3026510	forward	3	xanQ	guaD	ghxQ
xdhABC	2998367	3001990	forward	3	xdhA	xdhB	xdhC
yaeQ-arfB-nlpE	214291	215979	forward	3	yaeQ	arfB	nlpE
ychQA-kdsA	1266147	1268242	forward	3	ychQ	ychA	kdsA
yciVOQ	1321244	1324665	forward	3	yciV	yciO	yciQ
ycjXF-tyrR	1382141	1386285	forward	3	ycjX	ycjF	tyrR
ydbH-ynbE-ydbL	1441075	1444230	forward	3	ydbH	ynbE	ydbL
ydfABC	1646532	1647065	forward	3	ydfA	ydfB	ydfC
ydhIJK	1719049	1722157	forward	3	ydhI	ydhJ	ydhK
ydiNB-aroD	1770536	1773468	forward	3	ydiN	ydiB	aroD
yecN-cmoAB	1950290	1952437	forward	3	yecN	cmoA	cmoB
yegTUV	2176843	2180083	forward	3	yegT	yegU	yegV
yfdGHI	2465877	2468484	forward	3	yfdG	yfdH	yfdI
yfdRST	2473006	2474200	forward	3	yfdR	yfdS	yfdT
yffB-dapE-ypfN	2589269	2590984	forward	3	yffB	dapE	ypfN
yfiR-dgcN-yfiB	2739897	2742129	forward	3	yfiR	dgcN	yfiB
ygcNOP	2890679	2892793	forward	3	ygcN	ygcO	ygcP
yhcAD-ychE_1	3360134	3363686	forward	3	yhcA	yhcD	ychE_1
yhdT-panF-prmA	3405397	3407973	forward	3	yhdT	panF	prmA
yheSTU	3479311	3482458	forward	3	yheS	yheT	yheU
ykgEFG	320832	323677	forward	3	ykgE	ykgF	ykgG
ypdABC	2496693	2500009	forward	3	ypdA	ypdB	ypdC
yraIJK	3286112	3290454	forward	3	yraI	yraJ	yraK
yrfG-hslRO	3526691	3528674	forward	3	yrfG	hslR	hslO
appCBXA	1036963	1041138	forward	4	appC	appB	appX	appA
argX-hisR-leuT-proM	3980398	3980834	forward	4	argX	hisR	leuT	proM
atoDAEB	2321469	2325315	forward	4	atoD	atoA	atoE	atoB
bioBFCD	808567	812170	forward	4	bioB	bioF	bioC	bioD
creABCD	4633544	4637553	forward	4	creA	creB	creC	creD
cusCFBA	594823	601080	forward	4	cusC	cusF	cusB	cusA
deoCABD	4615346	4619625	forward	4	deoC	deoA	deoB	deoD
dinB-yafNOP	250898	253161	forward	4	dinB	yafN	yafO	yafP
eaeH-insE-1EF-1F-1	313581	315677	forward	4	eaeH	insE-1	insEF-1	insF-1
fes-ybdZ-entF-fepE	611960	618610	forward	4	fes	ybdZ	entF	fepE
fhuACDB	167484	173444	forward	4	fhuA	fhuC	fhuD	fhuB
fixABCX	42403	45750	forward	4	fixA	fixB	fixC	fixX
kbaZ-agaVWA	3276936	3279647	forward	4	kbaZ	agaV	agaW	agaA
lapAB-pyrF-yciH	1338267	1341008	forward	4	lapA	lapB	pyrF	yciH
mutY-yggX-mltC-nupG	3101035	3104992	forward	4	mutY	yggX	mltC	nupG
narGHJI	1279087	1285749	forward	4	narG	narH	narJ	narI
nirBDC-cysG	3492033	3497223	forward	4	nirB	nirD	nirC	cysG
nrdHIEF	2798745	2802483	forward	4	nrdH	nrdI	nrdE	nrdF
pdhR-aceEF-lpd	122092	129336	forward	4	pdhR	aceE	aceF	lpd
pepQ-yigZ-trkH-hemG	4029184	4033176	forward	4	pepQ	yigZ	trkH	hemG
potFGHI	893007	897152	forward	4	potF	potG	potH	potI
prpBCDE	347906	353816	forward	4	prpB	prpC	prpD	prpE
rfaD-waaFCL	3792010	3796230	forward	4	rfaD	waaF	waaC	waaL
rhsD-ybbC-ylbH-ybbD	522485	528124	forward	4	rhsD	ybbC	ylbH	ybbD
rpoZ-spoT-trmH-recG	3820129	3825314	forward	4	rpoZ	spoT	trmH	recG
rpsF-priB-rpsR-rplI	4423141	4424580	forward	4	rpsF	priB	rpsR	rplI
rrsB-gltT-rrlB-rrfB	4164682	4169779	forward	4	rrsB	gltT	rrlB	rrfB
rrsC-gltU-rrlC-rrfC	3939831	3944842	forward	4	rrsC	gltU	rrlC	rrfC
rrsE-gltV-rrlE-rrfE	4206170	4211182	forward	4	rrsE	gltV	rrlE	rrfE
scpA-argK-scpBC	3058872	3064302	forward	4	scpA	argK	scpB	scpC
smtA-mukFEB	972760	980009	forward	4	smtA	mukF	mukE	mukB
tatABCD	4019968	4022359	forward	4	tatA	tatB	tatC	tatD
tauABCD	384456	387870	forward	4	tauA	tauB	tauC	tauD
tgt-yajC-secDF	425361	429700	forward	4	tgt	yajC	secD	secF
thrLABC	190	5020	forward	4	thrL	thrA	thrB	thrC
tolC-ygiABC	3176137	3179603	forward	4	tolC	ygiA	ygiB	ygiC
valUXY-lysV	2518953	2519350	forward	4	valU	valX	valY	lysV
xylFGHR	3729154	3734180	forward	4	xylF	xylG	xylH	xylR
yahDEFG	334504	338967	forward	4	yahD	yahE	yahF	yahG
ybgC-tolQRA	773975	776830	forward	4	ybgC	tolQ	tolR	tolA
ybjC-nfsA-rimK-ybjN	890136	892656	forward	4	ybjC	nfsA	rimK	ybjN
ycaI-msbA-lpxK-ycaQ	963543	969844	forward	4	ycaI	msbA	lpxK	ycaQ
ycgZ-ymgA-ariR-ymgC	1215012	1216219	forward	4	ycgZ	ymgA	ariR	ymgC
yehLMPQ	2202618	2208966	forward	4	yehL	yehM	yehP	yehQ
yejABEF	2270386	2275911	forward	4	yejA	yejB	yejE	yejF
yfjR-ypjK-yfjST	2767725	2769637	forward	4	yfjR	ypjK	yfjS	yfjT
yhdWXYZ	3417171	3421216	forward	4	yhdW	yhdX	yhdY	yhdZ
yihXY-dtd-yiiD	4073576	4076461	forward	4	yihX	yihY	dtd	yiiD
yjbEFGH	4233929	4237753	forward	4	yjbE	yjbF	yjbG	yjbH
yjfKLMC	4409325	4412214	forward	4	yjfK	yjfL	yjfM	yjfC
ynbABCD	1475645	1480225	forward	4	ynbA	ynbB	ynbC	ynbD
yqjCDEK	3246991	3248398	forward	4	yqjC	yqjD	yqjE	yqjK
ytfQRT-yjfF	4447985	4452601	forward	4	ytfQ	ytfR	ytfT	yjfF
csiD-lhgO-gabDTP	2787007	2793675	forward	5	csiD	lhgO	gabD	gabT	gabP
dicB-ydfDE-insD-intQ	1647633	1650732	forward	5	dicB	ydfD	ydfE	insD	intQ
entCEBAH	624108	628936	forward	5	entC	entE	entB	entA	entH
fdrA-ylbE_1E_2F-ybcF	545904	550555	forward	5	fdrA	ylbE_1	ylbE_2	ylbF	ybcF
frlABCDR	3497932	3502805	forward	5	frlA	frlB	frlC	frlD	frlR
fucPIKUR	2932257	2938121	forward	5	fucP	fucI	fucK	fucU	fucR
hcaEFCBD	2667054	2671271	forward	5	hcaE	hcaF	hcaC	hcaB	hcaD
iaaA-gsiABCD	865791	872024	forward	5	iaaA	gsiA	gsiB	gsiC	gsiD
moaABCDE	816267	818970	forward	5	moaA	moaB	moaC	moaD	moaE
nsrR-rnr-rlmB-yjfIJ	4404213	4409274	forward	5	nsrR	rnr	rlmB	yjfI	yjfJ
oppABCDF	1299206	1304792	forward	5	oppA	oppB	oppC	oppD	oppF
pabC-yceG-tmk-holB-ycfH	1152523	1156797	forward	5	pabC	yceG	tmk	holB	ycfH
pspABCDE	1366103	1368027	forward	5	pspA	pspB	pspC	pspD	pspE
puuDRCBE	1359144	1364839	forward	5	puuD	puuR	puuC	puuB	puuE
ribF-ileS-lspA-fkpB-ispH	21407	27227	forward	5	ribF	ileS	lspA	fkpB	ispH
rrsA-ileT-alaT-rrlA-rrfA	4033554	4038659	forward	5	rrsA	ileT	alaT	rrlA	rrfA
rrsH-ileV-alaV-rrlH-rrfH	223771	228875	forward	5	rrsH	ileV	alaV	rrlH	rrfH
thrU-tyrU-glyT-thrT-tufB	4173411	4175151	forward	5	thrU	tyrU	glyT	thrT	tufB
ybcN-ninE-ybcO-rusA-ylcG	571689	573093	forward	5	ybcN	ninE	ybcO	rusA	ylcG
ybgIJKL-nei	742050	745949	forward	5	ybgI	ybgJ	ybgK	ybgL	nei
ydcSTUV-patD	1509678	1515026	forward	5	ydcS	ydcT	ydcU	ydcV	patD
ydiQRST-fadK	1777641	1782701	forward	5	ydiQ	ydiR	ydiS	ydiT	fadK
yfjXY-ypjJ-yfjZ-ypjF	2773941	2775804	forward	5	yfjX	yfjY	ypjJ	yfjZ	ypjF
yggSTU-rdgB-yggW	3093120	3096425	forward	5	yggS	yggT	yggU	rdgB	yggW
yhhZ-yrhA-insA-6AB-6B-6	3579886	3582203	forward	5	yhhZ	yrhA	insA-6	insAB-6	insB-6
yifL-dapF-yigA-xerC-yigB	3992545	3995922	forward	5	yifL	dapF	yigA	xerC	yigB
ynfEFGH-dmsD	1656093	1663144	forward	5	ynfE	ynfF	ynfG	ynfH	dmsD
agaS-kbaY-agaBCDI	3279998	3285047	forward	6	agaS	kbaY	agaB	agaC	agaD	agaI
elfDCG-ycbUVF	997713	1003880	forward	6	elfD	elfC	elfG	ycbU	ycbV	ycbF
fliFGHIJK	2011253	2017537	forward	6	fliF	fliG	fliH	fliI	fliJ	fliK
hinT-ycfL-lpoB-thiK-nagZ-ycfP	1161108	1164908	forward	6	hinT	ycfL	lpoB	thiK	nagZ	ycfP
hyaABCDEF	1031362	1036829	forward	6	hyaA	hyaB	hyaC	hyaD	hyaE	hyaF
hypABCDE-fhlA	2848669	2854438	forward	6	hypA	hypB	hypC	hypD	hypE	fhlA
insC-5CD-5D-5-yqiGHI	3184164	3189718	forward	6	insC-5	insCD-5	insD-5	yqiG	yqiH	yqiI
mdtABCD-baeSR	2152040	2163022	forward	6	mdtA	mdtB	mdtC	mdtD	baeS	baeR
mhpABCDFE	367835	374105	forward	6	mhpA	mhpB	mhpC	mhpD	mhpF	mhpE
nikABCDER	3611690	3617012	forward	6	nikA	nikB	nikC	nikD	nikE	nikR
nrdR-ribDE-nusB-thiL-pgpA	432226	436331	forward	6	nrdR	ribD	ribE	nusB	thiL	pgpA
rbsDACBKR	3931374	3937242	forward	6	rbsD	rbsA	rbsC	rbsB	rbsK	rbsR
rplKAJL-rpoBC	4176470	4187596	forward	6	rplK	rplA	rplJ	rplL	rpoB	rpoC
ulaABCDEF	4418003	4422409	forward	6	ulaA	ulaB	ulaC	ulaD	ulaE	ulaF
ydaSTUVW-rzpR	1418389	1421668	forward	6	ydaS	ydaT	ydaU	ydaV	ydaW	rzpR
yeeRST-cbeA-cbtA-yeeW	2072803	2076158	forward	6	yeeR	yeeS	yeeT	cbeA	cbtA	yeeW
arnBCADTEF	2363932	2371300	forward	7	arnB	arnC	arnA	arnD	arnT	arnE	arnF
fimAICDFGH	4541138	4547733	forward	7	fimA	fimI	fimC	fimD	fimF	fimG	fimH
fliLMNOPQR	2017642	2021702	forward	7	fliL	fliM	fliN	fliO	fliP	fliQ	fliR
gcl-hyi-glxR-ybbW-allB-ybbY-glxK	533140	542257	forward	7	gcl	hyi	glxR	ybbW	allB	ybbY	glxK
lsrACDBFG-tam	1599514	1606128	forward	7	lsrA	lsrC	lsrD	lsrB	lsrF	lsrG	tam
nrfABCDEFG	4285787	4292162	forward	7	nrfA	nrfB	nrfC	nrfD	nrfE	nrfF	nrfG
srlAEBD-gutM-srlR-gutQ	2823854	2828800	forward	7	srlA	srlE	srlB	srlD	gutM	srlR	gutQ
ydjXYZ-ynjABCD	1831425	1837424	forward	7	ydjX	ydjY	ydjZ	ynjA	ynjB	ynjC	ynjD
bamA-skp-lpxD-fabZ-lpxAB-rnhB-dnaE	197928	208608	forward	8	bamA	skp	lpxD	fabZ	lpxA	lpxB	rnhB	dnaE
ilvLXG_1G_2MEDA	3948345	3954898	forward	8	ilvL	ilvX	ilvG_1	ilvG_2	ilvM	ilvE	ilvD	ilvA
sdhCDAB-sucABCD	754400	764272	forward	8	sdhC	sdhD	sdhA	sdhB	sucA	sucB	sucC	sucD
yceD-rpmF-plsX-fabHDG-acpP-fabF	1146017	1152403	forward	8	yceD	rpmF	plsX	fabH	fabD	fabG	acpP	fabF
ydgK-rsxABCDGE-nth	1703274	1710182	forward	8	ydgK	rsxA	rsxB	rsxC	rsxD	rsxG	rsxE	nth
flgBCDEFGHIJ	1130241	1137535	forward	9	flgB	flgC	flgD	flgE	flgF	flgG	flgH	flgI	flgJ
hisLGDCBHAFI	2088020	2095249	forward	9	hisL	hisG	hisD	hisC	hisB	hisH	hisA	hisF	hisI
yiaKLMNO-lyxK-sgbHUE	3740756	3748804	forward	9	yiaK	yiaL	yiaM	yiaN	yiaO	lyxK	sgbH	sgbU	sgbE
yjeF-tsaE-amiB-mutL-miaA-hfq-hflXKC	4392089	4402327	forward	9	yjeF	tsaE	amiB	mutL	miaA	hfq	hflX	hflK	hflC
ymfTLMNROPQ-ycfK-ymfS	1202247	1207768	forward	10	ymfT	ymfL	ymfM	ymfN	ymfR	ymfO	ymfP	ymfQ	ycfK	ymfS
paaABCDEFGHIJK	1451951	1461462	forward	11	paaA	paaB	paaC	paaD	paaE	paaF	paaG	paaH	paaI	paaJ	paaK
ycjMNOPQRSTUV-ymjB	1368240	1379926	forward	11	ycjM	ycjN	ycjO	ycjP	ycjQ	ycjR	ycjS	ycjT	ycjU	ycjV	ymjB
yrbG-kdsDC-lptCAB-rpoN-hpf-ptsN-rapZ-npr	3338297	3346260	forward	11	yrbG	kdsD	kdsC	lptC	lptA	lptB	rpoN	hpf	ptsN	rapZ	npr
gspCDEFGHIJKLMO	3453600	3464242	forward	12	gspC	gspD	gspE	gspF	gspG	gspH	gspI	gspJ	gspK	gspL	gspM	gspO
hyfABCDEFGHIJR-focB	2599223	2612804	forward	12	hyfA	hyfB	hyfC	hyfD	hyfE	hyfF	hyfG	hyfH	hyfI	hyfJ	hyfR	focB
rfe-wzzE-wecBC-rffGHCA-wzxE-rffT-wzyE-rffM	3965939	3978719	forward	12	rfe	wzzE	wecB	wecC	rffG	rffH	rffC	rffA	wzxE	rffT	wzyE	rffM
mraZ-rsmH-ftsLI-murEF-mraY-murD-ftsW-murGC-ddlB-ftsQAZ-lpxC	89634	107474	forward	16	mraZ	rsmH	ftsL	ftsI	murE	murF	mraY	murD	ftsW	murG	murC	ddlB	ftsQ	ftsA	ftsZ	lpxC
aat	925951	926655	reverse	1	aat
abrB	745946	746992	reverse	1	abrB
accD	2431034	2431948	reverse	1	accD
acpH	423561	424142	reverse	1	acpH
adeP	3893295	3894632	reverse	1	adeP
adeQ	3840478	3841812	reverse	1	adeQ
adhE	1294669	1297344	reverse	1	adhE
adhP	1550852	1551862	reverse	1	adhP
adiA	4336277	4338544	reverse	1	adiA
adiC	4333717	4335054	reverse	1	adiC
adiY	4335191	4335952	reverse	1	adiY
aegA	2581568	2583547	reverse	1	aegA
aer	3215578	3217098	reverse	1	aer
aes	498238	499197	reverse	1	aes
agaR	3275878	3276687	reverse	1	agaR
ahr	4493213	4494232	reverse	1	ahr
ais	2363040	2363642	reverse	1	ais
alaC	2495079	2496317	reverse	1	alaC
alaS	2817403	2820033	reverse	1	alaS
aldB	3752996	3754534	reverse	1	aldB
alkA	2144716	2145564	reverse	1	alkA
allS	530519	531445	reverse	1	allS
alsK	4304893	4305822	reverse	1	alsK
amiC	2945779	2947032	reverse	1	amiC
ampC	4375834	4376967	reverse	1	ampC
ampH	394354	395511	reverse	1	ampH
anmK	1716517	1717626	reverse	1	anmK
ansB	3097704	3098750	reverse	1	ansB
ansP	1522505	1524004	reverse	1	ansP
apbE	2308501	2309556	reverse	1	apbE
aqpZ	914575	915270	reverse	1	aqpZ
araJ	410521	411705	reverse	1	araJ
arcA	4637613	4638329	reverse	1	arcA
arcB	3348711	3351047	reverse	1	arcB
arfA	3436453	3436671	reverse	1	arfA
argD	3486982	3488202	reverse	1	argD
argE	4151719	4152870	reverse	1	argE
argF	288525	289529	reverse	1	argF
argI	4475330	4476334	reverse	1	argI
argO	3066195	3066830	reverse	1	argO
aroP	120178	121551	reverse	1	aroP
arpA	4218324	4220510	reverse	1	arpA
arrS	3656009	3656077	reverse	1	arrS
artJ	899067	899798	reverse	1	artJ
ascG	2836276	2837286	reverse	1	ascG
asd	3571798	3572901	reverse	1	asd
aslA	3982375	3984030	reverse	1	aslA
asmA	2137783	2139636	reverse	1	asmA
asnB	696736	698400	reverse	1	asnB
asnS	986808	988208	reverse	1	asnS
asnW	2056051	2056126	reverse	1	asnW
aspC	983742	984932	reverse	1	aspC
aspS	1946774	1948546	reverse	1	aspS
atl	475206	475595	reverse	1	atl
azoR	1480279	1480884	reverse	1	azoR
azuC	1985897	1985983	reverse	1	azuC
bacA	3201332	3202153	reverse	1	bacA
bax	3734376	3735200	reverse	1	bax
bcr	2276592	2277782	reverse	1	bcr
bcsQ	3693256	3693984	reverse	1	bcsQ
bdcA	4471363	4472076	reverse	1	bdcA
bglX	2217714	2220011	reverse	1	bglX
bioA	807191	808480	reverse	1	bioA
bioH	3542096	3542866	reverse	1	bioH
bisC	3712084	3714417	reverse	1	bisC
blc	4375212	4375745	reverse	1	blc
bluF	1213487	1214698	reverse	1	bluF
bluR	1212551	1213282	reverse	1	bluR
borD	577823	578116	reverse	1	borD
bsmA	4414464	4414793	reverse	1	bsmA
bssS	1119924	1120178	reverse	1	bssS
C0614	2651474	2651560	reverse	1	C0614
cadC	4358419	4359957	reverse	1	cadC
can	142008	142670	reverse	1	can
cas3	2882575	2885241	reverse	1	cas3
cbl	2057988	2058938	reverse	1	cbl
cedA	1811445	1811687	reverse	1	cedA
chaA	1269972	1271072	reverse	1	chaA
chiA	3465182	3467875	reverse	1	chiA
cirA	2242800	2244791	reverse	1	cirA
citT	644340	645803	reverse	1	citT
clpB	2729622	2732195	reverse	1	clpB
coaA	4172099	4173049	reverse	1	coaA
comR	1167423	1168055	reverse	1	comR
copA	508099	510603	reverse	1	copA
cpdB	4432645	4434588	reverse	1	cpdB
crcB	656778	657161	reverse	1	crcB
cspB	1639363	1639578	reverse	1	cspB
cspD	921589	921813	reverse	1	cspD
cspH	1050186	1050398	reverse	1	cspH
cspI	1636479	1636691	reverse	1	cspI
csrA	2816983	2817168	reverse	1	csrA
csrB	2922178	2922546	reverse	1	csrB
csrD	3399414	3401354	reverse	1	csrD
cutA	4363041	4363379	reverse	1	cutA
cvrA	1239558	1241294	reverse	1	cvrA
cyaY	3991762	3992082	reverse	1	cyaY
cynR	357015	357914	reverse	1	cynR
cysE	3779764	3780585	reverse	1	cysE
cytR	4121454	4122479	reverse	1	cytR
dacA	661975	663186	reverse	1	dacA
dacD	2079405	2080571	reverse	1	dacD
dauA	1258347	1260026	reverse	1	dauA
dcp	1623359	1625404	reverse	1	dcp
dctA	3680184	3681470	reverse	1	dctA
dcuC	653806	655191	reverse	1	dcuC
ddlA	399053	400147	reverse	1	ddlA
deoR	881199	881957	reverse	1	deoR
dgcF	1608931	1609878	reverse	1	dgcF
dgcM	1404587	1405819	reverse	1	dgcM
dgcQ	2024347	2026041	reverse	1	dgcQ
dgcZ	1620984	1621874	reverse	1	dgcZ
dinI	1120465	1120710	reverse	1	dinI
dinQ	3645728	3645811	reverse	1	dinQ
dmlR	1878910	1879833	reverse	1	dmlR
dps	847631	848134	reverse	1	dps
dsbB	1231723	1232253	reverse	1	dsbB
dsbG	637050	637796	reverse	1	dsbG
dsdC	2474716	2475651	reverse	1	dsdC
dsrA	2023251	2023337	reverse	1	dsrA
dsrB	2022659	2022847	reverse	1	dsrB
dtpC	4352977	4354434	reverse	1	dtpC
dtpD	740298	741779	reverse	1	dtpD
dusC	2227460	2228407	reverse	1	dusC
eamA	1618262	1619161	reverse	1	eamA
ecpA	309308	309895	reverse	1	ecpA
ecpR	309970	310560	reverse	1	ecpR
elaA	2379104	2379565	reverse	1	elaA
elaB	2378744	2379049	reverse	1	elaB
elyC	971845	972624	reverse	1	elyC
envR	3410825	3411487	reverse	1	envR
epmB	4372652	4373680	reverse	1	epmB
eptA	4331970	4333613	reverse	1	eptA
eptB	3706807	3708498	reverse	1	eptB
eptC	4146555	4148288	reverse	1	eptC
ettA	4626878	4628545	reverse	1	ettA
fabA	1015175	1015693	reverse	1	fabA
fabB	2438407	2439627	reverse	1	fabB
fabI	1348275	1349063	reverse	1	fabI
fadE	240859	243303	reverse	1	fadE
fbaB	2175534	2176586	reverse	1	fbaB
fbp	4452634	4453632	reverse	1	fbp
fdhF	4295242	4297389	reverse	1	fdhF
feaR	1444402	1445307	reverse	1	feaR
fepB	622777	623733	reverse	1	fepB
ffh	2744456	2745817	reverse	1	ffh
fhuE	1158585	1160774	reverse	1	fhuE
fhuF	4602898	4603686	reverse	1	fhuF
fimZ	563071	563703	reverse	1	fimZ
fiu	838472	840754	reverse	1	fiu
fkpA	3474629	3475441	reverse	1	fkpA
fliC	2000134	2001630	reverse	1	fliC
fliE	2010724	2011038	reverse	1	fliE
fnr	1396798	1397550	reverse	1	fnr
folB	3202243	3202611	reverse	1	folB
fpr	4111749	4112495	reverse	1	fpr
fsr	502700	503920	reverse	1	fsr
ftsB	2870531	2870842	reverse	1	ftsB
ftsP	3159279	3160691	reverse	1	ftsP
galF	2111458	2112351	reverse	1	galF
galS	2238650	2239690	reverse	1	galS
gatR_1	2167717	2168163	reverse	1	gatR_1
gatR_2	2169419	2169757	reverse	1	gatR_2
gcd	138835	141225	reverse	1	gcd
gcvA	2939672	2940589	reverse	1	gcvA
gfcA	1048662	1048967	reverse	1	gfcA
ggt	3583104	3584846	reverse	1	ggt
glgS	3189761	3189961	reverse	1	glgS
glk	2506483	2507448	reverse	1	glk
glmY	2689179	2689362	reverse	1	glmY
gloB	234027	234782	reverse	1	gloB
glrK	2687693	2689120	reverse	1	glrK
gltA	752408	753691	reverse	1	gltA
gltS	3825483	3826688	reverse	1	gltS
gltX	2517279	2518694	reverse	1	gltX
glyA	2682276	2683529	reverse	1	glyA
glyU	2997006	2997079	reverse	1	glyU
gnd	2097886	2099292	reverse	1	gnd
gnsB	1635633	1635806	reverse	1	gnsB
gntP	4547976	4549319	reverse	1	gntP
gpmA	786066	786818	reverse	1	gpmA
gpp	3960768	3962252	reverse	1	gpp
grcA	2714088	2714471	reverse	1	grcA
greA	3326261	3326737	reverse	1	greA
grpE	2748137	2748730	reverse	1	grpE
grxA	889719	889976	reverse	1	grxA
grxB	1122630	1123277	reverse	1	grxB
grxD	1731778	1732125	reverse	1	grxD
gshA	2812905	2814461	reverse	1	gshA
gss	3134685	3136544	reverse	1	gss
gstB	879077	879703	reverse	1	gstB
gyrA	2334815	2337442	reverse	1	gyrA
gyrB	3875728	3878142	reverse	1	gyrB
hcaR	2666028	2666918	reverse	1	hcaR
hcaT	2664729	2665868	reverse	1	hcaT
hda	2616097	2616798	reverse	1	hda
hdfR	3945151	3945990	reverse	1	hdfR
hdhA	1695297	1696064	reverse	1	hdhA
hemB	387977	388951	reverse	1	hemB
hemL	173602	174882	reverse	1	hemL
hisS	2637323	2638597	reverse	1	hisS
hlyE	1228706	1229617	reverse	1	hlyE
hns	1291732	1292145	reverse	1	hns
hofQ	3517487	3518725	reverse	1	hofQ
hokA	3718471	3718623	reverse	1	hokA
hokB	1489946	1490095	reverse	1	hokB
hscC	680946	682616	reverse	1	hscC
hslJ	1439345	1439767	reverse	1	hslJ
hspQ	1027627	1027944	reverse	1	hspQ
htpX	1909719	1910600	reverse	1	htpX
htrL	3790849	3791706	reverse	1	htrL
hypT	4555401	4556312	reverse	1	hypT
iclR	4220827	4221651	reverse	1	iclR
ileY	2783784	2783859	reverse	1	ileY
ilvY	3954950	3955843	reverse	1	ilvY
inaA	2346844	2347494	reverse	1	inaA
infA	925448	925666	reverse	1	infA
insG	4500126	4501454	reverse	1	insG
insH-1	273325	274341	reverse	1	insH-1
insH-10	3363724	3364740	reverse	1	insH-10
insH-11	3650205	3651221	reverse	1	insH-11
insH-2	573960	574976	reverse	1	insH-2
insH-3	687220	688236	reverse	1	insH-3
insH-5	1425770	1426750	reverse	1	insH-5
insH-6	2064329	2065345	reverse	1	insH-6
insH-7	2099919	2100935	reverse	1	insH-7
insH-8	2287087	2288103	reverse	1	insH-8
intD	564038	565201	reverse	1	intD
intF	294920	296320	reverse	1	intF
iraM	1210903	1211226	reverse	1	iraM
isrB	1985863	1986022	reverse	1	isrB
istR-1	3851141	3851215	reverse	1	istR-1
istR-2	3851141	3851280	reverse	1	istR-2
kch	1307040	1308293	reverse	1	kch
kdgR	1907332	1908123	reverse	1	kdgR
kduD	2980519	2981280	reverse	1	kduD
kduI	2981310	2982146	reverse	1	kduI
kgtP	2722470	2723768	reverse	1	kgtP
ldcA	1241389	1242303	reverse	1	ldcA
ldhA	1439878	1440867	reverse	1	ldhA
ldrA	1268391	1268498	reverse	1	ldrA
ldrB	1268926	1269033	reverse	1	ldrB
ldrC	1269461	1269568	reverse	1	ldrC
ldrD	3698003	3698110	reverse	1	ldrD
ldtA	2060415	2061347	reverse	1	ldtA
ldtB	854047	854967	reverse	1	ldtB
ldtC	1168635	1169597	reverse	1	ldtC
ldtE	1755745	1756749	reverse	1	ldtE
leuE	1878145	1878783	reverse	1	leuE
lfhA	248358	250070	reverse	1	lfhA
lgoR	4592960	4593874	reverse	1	lgoR
lgoT	4591384	4592745	reverse	1	lgoT
ligB	3817511	3819193	reverse	1	ligB
lipA	658474	659439	reverse	1	lipA
livJ	3596578	3597681	reverse	1	livJ
lpxL	1114885	1115805	reverse	1	lpxL
lpxM	1937246	1938217	reverse	1	lpxM
lrhA	2403725	2404663	reverse	1	lrhA
luxS	2812240	2812755	reverse	1	luxS
lysA	2975659	2976921	reverse	1	lysA
lysC	4229907	4231256	reverse	1	lysC
lysO	913181	914080	reverse	1	lysO
lysP	2245085	2246554	reverse	1	lysP
lysU	4351223	4352740	reverse	1	lysU
maa	478591	479142	reverse	1	maa
maeA	1551996	1553693	reverse	1	maeA
maeB	2574120	2576399	reverse	1	maeB
malI	1696176	1697204	reverse	1	malI
marC	1616267	1616932	reverse	1	marC
mcaS	1403683	1403775	reverse	1	mcaS
mcbA	841019	841279	reverse	1	mcbA
mdh	3381352	3382290	reverse	1	mdh
mdtG	1113487	1114713	reverse	1	mdtG
mdtH	1123341	1124549	reverse	1	mdtH
mdtQ	2225345	2226433	reverse	1	mdtQ
melR	4338743	4339651	reverse	1	melR
mepM	1938337	1939659	reverse	1	mepM
metJ	4126101	4126418	reverse	1	metJ
metR	4009886	4010839	reverse	1	metR
mfd	1169741	1173187	reverse	1	mfd
mgrB	1906647	1906790	reverse	1	mgrB
mgrR	1620841	1620938	reverse	1	mgrR
mgsA	1025780	1026238	reverse	1	mgsA
miaB	692754	694178	reverse	1	miaB
micL	1956465	1956544	reverse	1	micL
mipA	1863750	1864496	reverse	1	mipA
mlaA	2462274	2463029	reverse	1	mlaA
mliC	1716090	1716419	reverse	1	mliC
mltA	2944103	2945200	reverse	1	mltA
mltB	2822513	2823598	reverse	1	mltB
mltD	232597	233955	reverse	1	mltD
mngR	764376	765098	reverse	1	mngR
mnmA	1191890	1192996	reverse	1	mnmA
mntH	2509490	2510728	reverse	1	mntH
mokB	1489986	1490153	reverse	1	mokB
mqo	2303130	2304776	reverse	1	mqo
mrp	2191081	2192190	reverse	1	mrp
mscS	3066969	3067829	reverse	1	mscS
msrA	4439561	4440199	reverse	1	msrA
msrB	1860040	1860453	reverse	1	msrB
msrC	1913655	1914206	reverse	1	msrC
msyB	1113030	1113404	reverse	1	msyB
mtr	3302595	3303839	reverse	1	mtr
mug	3212989	3213495	reverse	1	mug
murR	2542774	2543631	reverse	1	murR
nac	2059040	2059957	reverse	1	nac
nadC	117752	118645	reverse	1	nadC
nanR	3371720	3372511	reverse	1	nanR
narU	1540696	1542084	reverse	1	narU
ndk	2642455	2642886	reverse	1	ndk
nepI	3838572	3839762	reverse	1	nepI
nfsB	603994	604647	reverse	1	nfsB
nhaB	1232399	1233940	reverse	1	nhaB
nimR	1872779	1873600	reverse	1	nimR
nlpA	3837198	3838016	reverse	1	nlpA
nlpC	1790291	1790755	reverse	1	nlpC
nlpI	3306062	3306946	reverse	1	nlpI
nmpC	574981	576048	reverse	1	nmpC
norR	2828797	2830311	reverse	1	norR
nudE	3523611	3524171	reverse	1	nudE
nudK	2580925	2581500	reverse	1	nudK
nupX	2250917	2252167	reverse	1	nupX
ogrK	2165326	2165544	reverse	1	ogrK
ompA	1018236	1019276	reverse	1	ompA
ompC	2309668	2310771	reverse	1	ompC
ompF	985117	986205	reverse	1	ompF
ompL	4061626	4062318	reverse	1	ompL
omrA	2974124	2974211	reverse	1	omrA
omrB	2974326	2974407	reverse	1	omrB
opgB	4595173	4597464	reverse	1	opgB
opgC	1107007	1108164	reverse	1	opgC
opgE	850237	851820	reverse	1	opgE
osmB	1341134	1341352	reverse	1	osmB
osmE	1819942	1820280	reverse	1	osmE
oxyS	4156308	4156417	reverse	1	oxyS
paaZ	1449621	1451666	reverse	1	paaZ
panD	146314	146694	reverse	1	panD
parC	3161737	3163995	reverse	1	parC
pbpG	2221960	2222892	reverse	1	pbpG
pdeA	2513665	2515854	reverse	1	pdeA
pdeB	476291	477841	reverse	1	pdeB
pdeF	2624717	2626960	reverse	1	pdeF
pdeH	3676443	3677210	reverse	1	pdeH
pdeK	3681653	3683602	reverse	1	pdeK
pdeR	1342781	1344766	reverse	1	pdeR
pdxK	2534408	2535259	reverse	1	pdxK
pepA	4482463	4483974	reverse	1	pepA
pepB	2653097	2654380	reverse	1	pepB
pepD	254259	255716	reverse	1	pepD
pepE	4227476	4228165	reverse	1	pepE
perR	268513	269406	reverse	1	perR
pflA	949563	950303	reverse	1	pflA
pgsA	1990293	1990841	reverse	1	pgsA
pheU	4360574	4360649	reverse	1	pheU
phoE	258269	259324	reverse	1	phoE
pinH	2781087	2781230	reverse	1	pinH
pinR	1431108	1431698	reverse	1	pinR
pitB	3132894	3134393	reverse	1	pitB
plaP	2083728	2085086	reverse	1	plaP
pliG	1226294	1226695	reverse	1	pliG
plsB	4252066	4254489	reverse	1	plsB
plsC	3160766	3161503	reverse	1	plsC
pmrD	2371294	2371560	reverse	1	pmrD
pncB	988377	989579	reverse	1	pncB
pncC	2821871	2822368	reverse	1	pncC
polB	63429	65780	reverse	1	polB
ppa	4447145	4447675	reverse	1	ppa
ppc	4148470	4151121	reverse	1	ppc
pphA	1920337	1920993	reverse	1	pphA
ppiA	3489747	3490319	reverse	1	ppiA
ppiC	3957555	3957836	reverse	1	ppiC
pppA	3111565	3112374	reverse	1	pppA
ppsA	1782758	1785136	reverse	1	ppsA
pqqL	1570431	1573226	reverse	1	pqqL
priA	4122635	4124833	reverse	1	priA
proC	404059	404868	reverse	1	proC
proK	3706639	3706715	reverse	1	proK
proS	217057	218775	reverse	1	proS
prpR	346081	347667	reverse	1	prpR
pspF	1364959	1365936	reverse	1	pspF
psuT	2254107	2255357	reverse	1	psuT
ptrB	1924803	1926863	reverse	1	ptrB
purC	2594927	2595640	reverse	1	purC
purL	2689678	2693565	reverse	1	purL
purU	1287005	1287847	reverse	1	purU
putA	1074143	1078105	reverse	1	putA
pyrC	1120784	1121830	reverse	1	pyrC
qor	4261271	4262254	reverse	1	qor
queC	464076	464771	reverse	1	queC
queE	2902769	2903440	reverse	1	queE
queG	4390951	4392090	reverse	1	queG
racC	1415512	1415787	reverse	1	racC
racR	1417789	1418265	reverse	1	racR
rarD	4001311	4002201	reverse	1	rarD
rcnR	2183546	2183818	reverse	1	rcnR
rcsC	2315049	2317850	reverse	1	rcsC
rdgC	408332	409243	reverse	1	rdgC
rem	1642675	1642926	reverse	1	rem
rfaE	3193342	3194775	reverse	1	rfaE
rfaH	4022356	4022844	reverse	1	rfaH
rhaM	4091147	4091461	reverse	1	rhaM
rhaT	4097514	4098548	reverse	1	rhaT
rhlB	3962388	3963653	reverse	1	rhlB
rhtA	848433	849320	reverse	1	rhtA
rhtB	4006462	4007082	reverse	1	rhtB
ribA	1336594	1337184	reverse	1	ribA
ribC	1740625	1741266	reverse	1	ribC
ridA	4468550	4468936	reverse	1	ridA
rihA	682700	683635	reverse	1	rihA
rihB	2252267	2253208	reverse	1	rihB
rimO	875933	877258	reverse	1	rimO
rlmA	1904275	1905084	reverse	1	rlmA
rlmD	2911721	2913022	reverse	1	rlmD
rlmG	3232761	3233897	reverse	1	rlmG
rlmI	1028002	1029192	reverse	1	rlmI
rlmM	2938165	2939265	reverse	1	rlmM
rlmN	2641151	2642305	reverse	1	rlmN
rna	643420	644226	reverse	1	rna
rnb	1345002	1346936	reverse	1	rnb
rnd	1884888	1886015	reverse	1	rnd
rne	1140405	1143590	reverse	1	rne
rnhA	235535	236002	reverse	1	rnhA
rnk	642780	643190	reverse	1	rnk
rob	4632464	4633333	reverse	1	rob
rodZ	2639853	2640866	reverse	1	rodZ
roxA	1186342	1187463	reverse	1	roxA
rpiA	3056688	3057347	reverse	1	rpiA
rpoH	3597952	3598806	reverse	1	rpoH
rpsT	20815	21078	reverse	1	rpsT
rsd	4194355	4194831	reverse	1	rsd
rsgA	4388480	4389532	reverse	1	rsgA
rsmC	4604692	4605723	reverse	1	rsmC
rsmI	3290497	3291357	reverse	1	rsmI
rsuA	2277810	2278505	reverse	1	rsuA
rttR	1286289	1286459	reverse	1	rttR
rybB	887200	887280	reverse	1	rybB
rydB	1762737	1762804	reverse	1	rydB
rydC	1489467	1489530	reverse	1	rydC
ryfD	2732175	2732317	reverse	1	ryfD
ryhB	3578950	3579039	reverse	1	ryhB
ryjA	4275950	4276089	reverse	1	ryjA
sad	1611339	1612727	reverse	1	sad
satP	9928	10494	reverse	1	satP
sbmC	2078813	2079286	reverse	1	sbmC
sdiA	1994134	1994856	reverse	1	sdiA
sdsR	1921128	1921231	reverse	1	sdsR
serA	3055200	3056432	reverse	1	serA
serT	1030848	1030935	reverse	1	serT
serU	2041492	2041581	reverse	1	serU
serW	925107	925194	reverse	1	serW
serX	1096788	1096875	reverse	1	serX
shoB	2698139	2698219	reverse	1	shoB
sibD	3192743	3192887	reverse	1	sibD
sibE	3193119	3193262	reverse	1	sibE
sixA	2454349	2454834	reverse	1	sixA
slyA	1718414	1718848	reverse	1	slyA
slyD	3475929	3476519	reverse	1	slyD
smf	3430458	3431582	reverse	1	smf
smg	3430013	3430486	reverse	1	smg
sodC	1722158	1722679	reverse	1	sodC
soxS	4275083	4275406	reverse	1	soxS
speC	3105042	3107177	reverse	1	speC
spy	1823164	1823649	reverse	1	spy
sraA	457952	458008	reverse	1	sraA
sroH	4188350	4188510	reverse	1	sroH
sseB	2652179	2652955	reverse	1	sseB
sthA	4157413	4158813	reverse	1	sthA
stpA	2796113	2796517	reverse	1	stpA
sulA	1019633	1020142	reverse	1	sulA
syd	2922757	2923302	reverse	1	syd
symE	4577522	4577863	reverse	1	symE
tcdA	2943058	2943864	reverse	1	tcdA
tesB	473525	474385	reverse	1	tesB
thpR	161501	162031	reverse	1	thpR
tktA	3077666	3079657	reverse	1	tktA
tldD	3388605	3390050	reverse	1	tldD
torR	1056485	1057177	reverse	1	torR
torS	1052657	1055401	reverse	1	torS
tp2	122697	122857	reverse	1	tp2
tpiA	4108763	4109530	reverse	1	tpiA
tpke70	2494216	2494651	reverse	1	tpke70
tpx	1386329	1386835	reverse	1	tpx
treA	1244902	1246599	reverse	1	treA
treR	4464322	4465269	reverse	1	treR
trmA	4160193	4161293	reverse	1	trmA
trmJ	2660605	2661345	reverse	1	trmJ
truD	2868277	2869326	reverse	1	truD
trxB	930308	931273	reverse	1	trxB
tsaD	3207552	3208565	reverse	1	tsaD
tsx	430353	431237	reverse	1	tsx
ttcA	1409037	1409972	reverse	1	ttcA
ttdR	3203346	3204278	reverse	1	ttdR
tusA	3606774	3607019	reverse	1	tusA
tusE	1029562	1029891	reverse	1	tusE
tynA	1447100	1449373	reverse	1	tynA
ucpA	2541854	2542645	reverse	1	ucpA
ugd	2096471	2097637	reverse	1	ugd
uhpT	3843799	3845190	reverse	1	uhpT
uidR	1694486	1695076	reverse	1	uidR
ulaG	4416584	4417648	reverse	1	ulaG
ulaR	4415721	4416476	reverse	1	ulaR
uspB	3637408	3637743	reverse	1	uspB
uspE	1395696	1396646	reverse	1	uspE
uspF	1433209	1433643	reverse	1	uspF
uspG	640662	641090	reverse	1	uspG
uvrA	4269072	4271894	reverse	1	uvrA
uxaB	1607253	1608704	reverse	1	uxaB
ves	1822386	1822961	reverse	1	ves
waaH	3787070	3788104	reverse	1	waaH
wbbL_2	2099420	2099701	reverse	1	wbbL_2
wzzB	2095345	2096325	reverse	1	wzzB
xapR	2519615	2520499	reverse	1	xapR
xylE	4238802	4240277	reverse	1	xylE
yaaA	5683	6459	reverse	1	yaaA
yaaI	11382	11786	reverse	1	yaaI
yaaJ	6529	7959	reverse	1	yaaJ
yaaW	10643	11356	reverse	1	yaaW
yacH	129407	131260	reverse	1	yacH
yadN	156299	156883	reverse	1	yadN
yaeF	216179	217003	reverse	1	yaeF
yaeH	183709	184095	reverse	1	yaeH
yaeI	184257	185069	reverse	1	yaeI
yafC	229967	230881	reverse	1	yafC
yafK	245065	245805	reverse	1	yafK
yafU	238746	239084	reverse	1	yafU
yafV	239419	240189	reverse	1	yafV
yagI	287628	288386	reverse	1	yagI
yagK	291546	292172	reverse	1	yagK
yagN	294363	294803	reverse	1	yagN
yagP	296605	297015	reverse	1	yagP
yahB	332725	333657	reverse	1	yahB
yahC	333749	334246	reverse	1	yahC
yahN	344890	345561	reverse	1	yahN
yaiF	381728	382114	reverse	1	yaiF
yaiP	381963	383159	reverse	1	yaiP
yaiS	383283	383840	reverse	1	yaiS
yaiY	398249	398557	reverse	1	yaiY
yajI	431536	432075	reverse	1	yajI
yajR	444526	445890	reverse	1	yajR
ybaE	464836	466536	reverse	1	ybaE
ybaK	505827	506306	reverse	1	ybaK
ybaL	500786	502462	reverse	1	ybaL
ybaP	506510	507304	reverse	1	ybaP
ybbB	529356	530450	reverse	1	ybbB
ybbN	516649	517503	reverse	1	ybbN
ybcC	565321	565584	reverse	1	ybcC
ybcH	586314	587204	reverse	1	ybcH
ybcI	555255	555776	reverse	1	ybcI
ybcV	578407	578817	reverse	1	ybcV
ybcY	581375	581959	reverse	1	ybcY
ybdF	604741	605109	reverse	1	ybdF
ybdG	602639	603886	reverse	1	ybdG
ybdH	631612	632700	reverse	1	ybdH
ybdJ	605174	605422	reverse	1	ybdJ
ybdK	605488	606606	reverse	1	ybdK
ybdM	633970	634599	reverse	1	ybdM
ybdN	634572	635792	reverse	1	ybdN
ybdO	635939	636841	reverse	1	ybdO
ybeF	659648	660601	reverse	1	ybeF
ybeQ	674793	675770	reverse	1	ybeQ
ybeT	678075	678629	reverse	1	ybeT
ybfE	710828	711121	reverse	1	ybfE
ybfF	711261	712025	reverse	1	ybfF
ybgD	751452	752018	reverse	1	ybgD
ybgS	784160	784540	reverse	1	ybgS
ybhA	796836	797654	reverse	1	ybhA
ybhB	806656	807132	reverse	1	ybhB
ybhC	805221	806504	reverse	1	ybhC
ybhD	798845	799861	reverse	1	ybhD
ybhK	814962	815870	reverse	1	ybhK
ybiA	831691	832173	reverse	1	ybiA
ybiI	837413	837679	reverse	1	ybiI
ybiJ	836888	837148	reverse	1	ybiJ
ybiO	842478	844703	reverse	1	ybiO
ybiU	857019	858284	reverse	1	ybiU
ybiV	858436	859251	reverse	1	ybiV
ybiX	837753	838430	reverse	1	ybiX
ybjG	882015	882611	reverse	1	ybjG
ybjH	884169	884453	reverse	1	ybjH
ybjL	887357	889042	reverse	1	ybjL
ybjP	903175	903690	reverse	1	ybjP
ybjS	904963	905976	reverse	1	ybjS
ybjX	917351	918307	reverse	1	ybjX
ycaC	944154	944780	reverse	1	ycaC
ycaN	947883	948791	reverse	1	ycaN
ycaO	954095	955855	reverse	1	ycaO
ycbX	1005714	1006823	reverse	1	ycbX
ycbZ	1015762	1017522	reverse	1	ycbZ
yccA	1029982	1030641	reverse	1	yccA
yccM	1051512	1052585	reverse	1	yccM
yccT	1026334	1026996	reverse	1	yccT
yceB	1121936	1122496	reverse	1	yceB
yceF	1145234	1145818	reverse	1	yceF
ycfT	1173315	1174388	reverse	1	ycfT
ycgB	1234932	1236464	reverse	1	ycgB
ycgR	1243016	1243750	reverse	1	ycgR
ycgV	1252308	1255175	reverse	1	ycgV
ycgX	1211926	1212330	reverse	1	ycgX
ychJ	1287897	1288355	reverse	1	ychJ
ychN	1272469	1272822	reverse	1	ychN
yciA	1309872	1310270	reverse	1	yciA
yciI	1308593	1308889	reverse	1	yciI
yciN	1328441	1328692	reverse	1	yciN
yciW	1347004	1348131	reverse	1	yciW
ycjD	1349431	1349784	reverse	1	ycjD
ycjW	1380987	1381985	reverse	1	ycjW
ydcI	1492172	1493095	reverse	1	ydcI
ydcK	1497493	1498473	reverse	1	ydcK
ydcO	1502929	1504104	reverse	1	ydcO
yddE	1532989	1533882	reverse	1	yddE
yddG	1544312	1545193	reverse	1	yddG
yddH	1531306	1531875	reverse	1	yddH
yddM	1550422	1550784	reverse	1	yddM
yddW	1565528	1566847	reverse	1	yddW
ydeI	1622129	1622521	reverse	1	ydeI
ydeK	1592133	1596110	reverse	1	ydeK
ydeP	1582231	1584510	reverse	1	ydeP
ydeQ	1584844	1585758	reverse	1	ydeQ
ydeU	1590689	1592089	reverse	1	ydeU
ydfI	1627477	1628937	reverse	1	ydfI
ydfJ	1629026	1630309	reverse	1	ydfJ
ydgC	1679719	1680054	reverse	1	ydgC
ydgJ	1701292	1702332	reverse	1	ydgJ
ydhB	1736890	1737822	reverse	1	ydhB
ydhF	1722760	1723656	reverse	1	ydhF
ydhL	1723705	1723944	reverse	1	ydhL
ydhP	1734145	1735314	reverse	1	ydhP
ydhQ	1742895	1744151	reverse	1	ydhQ
ydhZ	1752956	1753165	reverse	1	ydhZ
ydiP	1776414	1777325	reverse	1	ydiP
ydiU	1787832	1789268	reverse	1	ydiU
ydiV	1789331	1790044	reverse	1	ydiV
ydiY	1803349	1804107	reverse	1	ydiY
ydjE	1850645	1852003	reverse	1	ydjE
ydjF	1852120	1852878	reverse	1	ydjF
ydjO	1810353	1811168	reverse	1	ydjO
yeaC	1859726	1859998	reverse	1	yeaC
yeaE	1862806	1863660	reverse	1	yeaE
yeaQ	1877031	1877279	reverse	1	yeaQ
yebE	1927072	1927731	reverse	1	yebE
yebF	1928058	1928414	reverse	1	yebF
yebG	1928481	1928771	reverse	1	yebG
yebO	1906285	1906572	reverse	1	yebO
yecA	1988978	1989643	reverse	1	yecA
yecH	1987275	1987514	reverse	1	yecH
yecJ	1985531	1985782	reverse	1	yecJ
yedD	2005701	2006114	reverse	1	yedD
yedI	2026473	2027390	reverse	1	yedI
yedM	2010025	2010375	reverse	1	yedM
yeeA	2077557	2078615	reverse	1	yeeA
yeeO	2056227	2057870	reverse	1	yeeO
yeeX	2077056	2077385	reverse	1	yeeX
yeeY	2085353	2086282	reverse	1	yeeY
yeeZ	2086328	2087152	reverse	1	yeeZ
yegI	2147063	2149009	reverse	1	yegI
yegW	2180057	2180803	reverse	1	yegW
yegX	2180855	2181673	reverse	1	yegX
yehE	2190537	2190818	reverse	1	yehE
yehS	2209748	2210218	reverse	1	yehS
yeiE	2246759	2247640	reverse	1	yeiE
yeiW	2263063	2263317	reverse	1	yeiW
yejG	2275915	2276259	reverse	1	yejG
yejK	2280962	2281969	reverse	1	yejK
yejO	2284412	2286922	reverse	1	yejO
yfaL	2338439	2342191	reverse	1	yfaL
yfaY	2360453	2361655	reverse	1	yfaY
yfaZ	2361755	2362297	reverse	1	yfaZ
yfbK	2382017	2383744	reverse	1	yfbK
yfbN	2385732	2386448	reverse	1	yfbN
yfbS	2407542	2409374	reverse	1	yfbS
yfbV	2410699	2411154	reverse	1	yfbV
yfcD	2416656	2417198	reverse	1	yfcD
yfcE	2417256	2417810	reverse	1	yfcE
yfcF	2417863	2418507	reverse	1	yfcF
yfcI	2420671	2421561	reverse	1	yfcI
yfcJ	2436964	2438142	reverse	1	yfcJ
yfcV	2453105	2453668	reverse	1	yfcV
yfcZ	2458672	2458956	reverse	1	yfcZ
yfdY	2493072	2493314	reverse	1	yfdY
[truncated: 644 more rows]

## Sheet: Opero_TU_geneV9.1
Distribution of transcription unit (TU) and genes in E. coli K-12 MG1655 operons
Data source Regulon DB v9.0
Description of columns:
1.-ID operon designed by RegulonDB v9.0
2.-Operon name
3.-Numer of TUs in the operon
4.-Number of genes in the operon
ID operon	Operon_Name	#TU_Operon	#Genes_Operon
ECK120023633	aaeR	1	1
ECK120028305	aaeXAB	1	3
ECK120029505	aas-lplT	1	2
ECK120029147	aat	1	1
ECK120023634	abgR	1	1
ECK125203373	abpAB	1	2
ECK120029116	abrB	1	1
ECK120014772	accD	1	1
ECK120023637	acpH	1	1
ECK120028343	acpT	1	1
ECK120014774	acrEF	1	2
ECK120016656	acrR	1	1
ECK125147437	acrZ	1	1
ECK120028942	add	1	1
ECK125165362	adeD	1	1
ECK125165370	adeP	1	1
ECK125165361	adeQ	1	1
ECK120029399	adhP	1	1
ECK120014775	adiA	1	1
ECK120028063	adiC	1	1
ECK120014504	adiY	1	1
ECK120014982	adk	1	1
ECK120028524	aegA	1	1
ECK120014400	aer	1	1
ECK120015124	aes	1	1
ECK120015006	agaR	1	1
ECK120026435	agaS-kbaY-agaBCDI	1	6
ECK120015921	agp	1	1
ECK125160706	agrA	1	1
ECK125160707	agrB	1	1
ECK125160631	ahr	1	1
ECK120014903	aidB	1	1
ECK120023639	ais	1	1
ECK125135000	alaC	1	1
ECK125135286	alaE	1	1
ECK120014978	alaS	1	1
ECK120014550	alaWX	1	2
ECK120014563	aldA	1	1
ECK120014936	aldB	1	1
ECK120015032	alkA	1	1
ECK120026433	allA	1	1
ECK125108712	allDCE	1	3
ECK120026426	allR	1	1
ECK120015854	allS	1	1
ECK120029393	alpA	1	1
ECK120030600	alsK	1	1
ECK125134697	alx	1	1
ECK120023640	amiC	1	1
ECK120014974	amn	1	1
ECK120014573	ampC	1	1
ECK120014776	ampDE	1	2
ECK120015924	amyA	1	1
ECK120028720	anmK	1	1
ECK120014777	ansA-pncA	1	2
ECK120028678	apbE	1	1
ECK120028060	aphA	1	1
ECK120029413	apt	1	1
ECK120014366	aqpZ	1	1
ECK120014758	araBAD	1	3
ECK120015033	araC	1	1
ECK120014906	araJ	1	1
ECK120015127	arcB	1	1
ECK125095404	arcZ	1	1
ECK125134996	arfA	1	1
ECK120020933	argA	1	1
ECK120015034	argCBH	1	3
ECK120014912	argD	1	1
ECK120015035	argF	1	1
ECK120015126	argG	1	1
ECK120015036	argI	1	1
ECK120028436	argO	1	1
ECK120014386	argP	1	1
ECK120029396	argS	1	1
ECK120014527	argU	1	1
ECK120014536	argW	1	1
ECK120014539	argX-hisR-leuT-proM	1	4
ECK120033535	arnBCADTEF	1	7
ECK120015038	aroF-tyrA	1	2
ECK120014830	aroG	1	1
ECK120028259	arpA	1	1
ECK120028744	arpB_1B_2	1	2
ECK125135288	arrS	1	1
ECK120014778	arsRBC	1	3
ECK120015888	artJ	1	1
ECK120014781	ascG	1	1
ECK120028334	asd	1	1
ECK120023642	aslA	1	1
ECK120026423	aslB	1	1
ECK120028622	asmA	1	1
ECK120014913	asnA	1	1
ECK120015104	asnB	1	1
ECK120028949	asnS	1	1
ECK120014533	asnT	1	1
ECK120014534	asnU	1	1
ECK120014535	asnV	1	1
ECK120015047	asnW	1	1
ECK120014983	aspC	1	1
ECK120030593	aspT	1	1
ECK120030595	aspU	1	1
ECK120014525	aspV	1	1
ECK120014408	asr	1	1
ECK120033109	atl	1	1
ECK120015852	atoDAEB	1	4
ECK120028679	atoSC	1	2
ECK120028370	avtA	1	1
ECK120023643	azoR	1	1
ECK125108710	azuC	1	1
ECK120015936	bacA	1	1
ECK120034582	bamB-der	1	2
ECK125135287	bamE	1	1
ECK120016667	barA	1	1
ECK120014784	basRS	1	2
ECK120028167	bax	1	1
ECK120014984	bcp	1	1
ECK120029394	bcr	1	1
ECK120027977	bcsEFG	1	3
ECK125095176	bcsQ	1	1
ECK125140820	bdcA	1	1
ECK125140821	bdcR	1	1
ECK120014916	betIBA	1	3
ECK120014917	betT	1	1
ECK120028316	bfd-bfr	1	2
ECK120016775	bglA	1	1
ECK120028198	bglH-yieLK	1	3
ECK120015925	bglX	1	1
ECK120014833	bioA	1	1
ECK120014918	bioBFCD	1	4
ECK120023644	bioH	1	1
ECK120023645	bisC	1	1
ECK120014985	blc	1	1
ECK120028022	blr	1	1
ECK125147438	bluR	1	1
ECK120015866	borD	1	1
ECK120029236	brnQ-proY	1	2
ECK125095411	bsmA	1	1
ECK120028047	bssR	1	1
ECK120028057	btuB-murI	1	2
ECK120014785	btuCED	1	3
ECK120029173	C0067	1	1
ECK120029000	C0293	1	1
ECK120030558	C0299	1	1
ECK120030565	C0362	1	1
ECK120028174	C0465	1	1
ECK120028171	C0614	1	1
ECK120030564	C0664	1	1
ECK120028051	C0719	1	1
ECK120014919	cadC	1	1
ECK120014565	caiF	1	1
ECK120023646	can	1	1
ECK125095155	cas3	1	1
ECK120014387	cbl	1	1
ECK120015088	cdaR	1	1
ECK120014505	cdd	1	1
ECK125229268	cdgI	1	1
ECK120014986	cdh	1	1
ECK120030567	cdsA	1	1
ECK120014492	cedA	1	1
ECK120023647	chaA	1	1
ECK120014787	chbBCARFG	1	6
ECK120014455	chiA	1	1
ECK125166140	chiX	1	1
ECK120015902	cho	1	1
ECK120029087	citT	1	1
ECK120029292	clcA	1	1
ECK120028933	clcB	1	1
ECK120014685	clpB	1	1
ECK120030584	clpS	1	1
ECK125147415	clsA-yciU	1	2
ECK120030499	cnu	1	1
ECK120028164	coaA	1	1
ECK120014743	codBA	1	2
ECK120029246	cof	1	1
ECK125141402	comR	1	1
ECK120014452	copA	1	1
ECK120014702	corA	1	1
ECK120014921	cpdB	1	1
ECK120014363	cpxP	1	1
ECK120016673	cpxRA	1	2
ECK125141409	cra	1	1
ECK120023648	crcB	1	1
ECK120028605	csdAE	1	2
ECK120015060	csiE	1	1
ECK120030601	csiR	1	1
ECK120015020	cspB	1	1
ECK120014987	cspD	1	1
ECK120015021	cspG	1	1
ECK120023650	cspH	1	1
ECK120015096	csrB	1	1
ECK120015099	csrC	1	1
ECK120029384	csrD	1	1
ECK120014454	cueO	1	1
ECK120029155	cueR	1	1
ECK125135279	curA	1	1
ECK120014415	cusCFBA	1	4
ECK120014416	cusRS	1	2
ECK120014584	cutA	1	1
ECK120029023	cvrA	1	1
ECK120035061	cyaR	1	1
ECK120028165	cyaY	1	1
ECK120028865	cybB	1	1
ECK120028110	cybC	1	1
ECK120028102	cycA	1	1
ECK120014791	cydDC	1	2
ECK125162053	cydX-ybgE	1	2
ECK120014941	cynR	1	1
ECK120014907	cyoABCDE	1	5
ECK120014888	cysB	1	1
ECK120014943	cysDNC	1	3
ECK120014988	cysE	1	1
ECK120014942	cysPUWAM	1	5
ECK120029379	cysQ	1	1
ECK120020936	cysS	1	1
ECK120029422	cysZ	1	1
ECK120014956	cytR	1	1
ECK120029097	dacA	1	1
ECK120023651	dacB	1	1
ECK120023652	dacC	1	1
ECK120028611	dacD	1	1
ECK125160634	dauA	1	1
ECK120014793	dcm-vsr	1	2
ECK120023653	dcp	1	1
ECK120028341	dcrB	1	1
ECK120014392	dctA	1	1
ECK120014406	dcuC	1	1
ECK125229272	dcyD-tcyLN	1	3
ECK120023654	ddlA	1	1
ECK120014794	def-fmt	1	2
ECK120023949	degP	1	1
ECK120029141	deoR	1	1
ECK120030583	dfp	1	1
ECK125229282	dgcC	1	1
ECK125229280	dgcE	1	1
ECK125229266	dgcF	1	1
ECK125229269	dgcJ	1	1
ECK125229277	dgcM	1	1
ECK125229279	dgcP	1	1
ECK125229273	dgcQ	1	1
ECK125229276	dgcT	1	1
ECK125162045	dgcZ	1	1
ECK120028188	dgoRKADT	1	5
ECK120015875	dhaR	1	1
ECK120030570	diaA	1	1
ECK120028927	dicA	1	1
ECK120028018	dicB-ydfDE-insD-intQ	1	5
ECK120028017	dicC-ydfXW	1	3
ECK120028929	dicF	1	1
ECK120028384	dinD	1	1
ECK120014963	dinG	1	1
ECK120028983	dinI	1	1
ECK120029177	dinJ-yafQ	1	2
ECK120015898	dinQ	1	1
ECK120029275	djlA	1	1
ECK120029168	dkgB	1	1
ECK120023655	dld	1	1
ECK125109836	dmlA	1	1
ECK125109835	dmlR	1	1
ECK120028269	dnaB	1	1
ECK120029256	dnaX	1	1
ECK125095403	dosCP	1	2
ECK120014796	dppABCDF	1	5
ECK120014724	dps	1	1
ECK120029021	dsbB	1	1
ECK120029414	dsbG	1	1
ECK120014945	dsdC	1	1
ECK120023656	dsrA	1	1
ECK120023657	dsrB	1	1
ECK125166139	dtpA	1	1
ECK120034915	dtpB	1	1
ECK125166135	dtpC	1	1
ECK125095406	dtpD	1	1
ECK120028268	dusA	1	1
ECK120014838	dusB-fis	1	2
ECK120028655	dusC	1	1
ECK120015904	dut-slmA	1	2
ECK120029160	dxr	1	1
ECK120029210	eaeH-insE-1EF-1F-1	1	4
ECK120023739	eamA	1	1
ECK120030537	eamB	1	1
ECK120014926	ebgAC	1	2
ECK120028478	ebgR	1	1
ECK120023658	eco	1	1
ECK125147435	ecpA	1	1
ECK125147413	ecpR	1	1
ECK120033536	efeOB	1	2
ECK120028970	efeU_1U_2	1	2
ECK120014382	efp	1	1
ECK120028687	elaA	1	1
ECK120028686	elaB	1	1
ECK120028689	elaD	1	1
ECK120028294	elbB-mtgA	1	2
ECK125134981	elfA	1	1
ECK125134982	elfDCG-ycbUVF	1	6
ECK125165372	elyC	1	1
ECK120029386	emrD	1	1
ECK120016674	emrKY	1	2
ECK120023660	emtA	1	1
ECK120023661	envR	1	1
ECK125147432	epmA	1	1
ECK125147431	epmB	1	1
ECK120030572	eptA	1	1
ECK120028363	eptB	1	1
ECK125160700	eptC	1	1
ECK120033110	erpA	1	1
ECK125147427	esrE	1	1
ECK125141408	essD-rrrD-rzpD	1	3
ECK125141411	essQ-ydfR-rrrQ-ydfP	1	4
ECK125165371	ettA	1	1
ECK120030502	eutBCLKR	1	5
ECK120028518	eutHA	1	2
ECK120028519	eutNEJG	1	4
ECK120028520	eutSPQTDM	1	6
ECK120015111	exuR	1	1
ECK120014900	fabA	1	1
ECK120014393	fabB	1	1
ECK120028254	fabR-yijD	1	2
ECK120014759	fadBA	1	2
ECK125095407	fadD-sroD	1	2
ECK120023662	fadE	1	1
ECK120028480	fadH	1	1
ECK120015120	fadIJ	1	2
ECK120014891	fadL	1	1
ECK125095398	fadM	1	1
ECK120017007	fbaB	1	1
ECK120016666	fbp	1	1
ECK120028240	fdhD	1	1
ECK120014948	fdhF	1	1
ECK120014952	fdnGHI	1	3
ECK120014799	fdoGHI-fdhE	1	4
ECK120029055	fdrA-ylbE_1E_2F-ybcF	1	5
ECK120014947	fecABCDE	1	5
ECK120014706	fecIR	1	2
ECK120014713	fepA-entD	1	2
ECK120014714	fepB	1	1
ECK120016637	fes-ybdZ-entF-fepE	1	4
ECK125165354	fetAB	1	2
ECK120028557	ffh	1	1
ECK120029249	ffs	1	1
ECK120014837	fhuACDB	1	4
ECK120014441	fhuE	1	1
ECK120028245	fieF	1	1
ECK120020905	fimAICDFGH	1	7
ECK120020906	fimE	1	1
ECK120023665	fimZ	1	1
ECK120014439	fiu	1	1
ECK120014566	fixABCX	1	4
ECK120028101	fklB	1	1
ECK120014459	fldB	1	1
ECK120016760	flgBCDEFGHIJ	1	9
ECK120016762	flgKL	1	2
ECK120016763	flhBAE	1	3
ECK120014395	fliC	1	1
ECK120015119	flk	1	1
ECK120014394	flxA	1	1
ECK120014839	fnr	1	1
ECK125108926	fnrS	1	1
ECK120014967	folA	1	1
ECK120029390	folB	1	1
ECK120028702	folC-dedD	1	2
ECK120029058	folD-ybcJ	1	2
ECK120028659	folE-yeiB	1	2
ECK120028288	folP-glmM	1	2
ECK120028701	folX-yfcH	1	2
ECK120014734	fpr	1	1
ECK120014840	frdABCD	1	4
ECK120016644	frlABCDR	1	5
ECK120029225	frmRAB	1	3
ECK120029159	frr	1	1
ECK120029185	frsA	1	1
ECK120014711	fruBKA	1	3
ECK120028242	frvABXR	1	4
ECK120028056	frwCB	1	2
ECK120030614	frwD	1	1
ECK120030494	fryBC-ypdFE-fryA	1	5
ECK120023666	fsaA	1	1
ECK120029259	fsr	1	1
ECK120028807	ftnA	1	1
ECK120030615	ftsB	1	1
ECK120033229	ftsP	1	1
ECK120014804	ftsYEX	1	3
ECK120014933	fucAO	1	2
ECK120014409	fxsA	1	1
ECK120014954	gadY	1	1
ECK120030573	galF	1	1
ECK120015906	galP	1	1
ECK120015025	galR	1	1
ECK120014841	galS	1	1
ECK120015923	galU	1	1
ECK120016651	gapC_1C_2	1	2
ECK120015084	garD	1	1
ECK120016660	gatR_1	1	1
ECK120015878	gatR_2	1	1
ECK120014721	gcvA	1	1
ECK120014960	gcvB	1	1
ECK120014381	gdhA	1	1
ECK120030513	gfcA	1	1
ECK120030512	gfcBCD	1	3
ECK120030511	gfcE-etp-etk	1	3
ECK120023668	ggt	1	1
ECK120028974	ghrA	1	1
ECK120028367	ghrB	1	1
ECK125165364	ghxP	1	1
ECK120014422	glcC	1	1
ECK125147420	glf-wbbH	1	2
ECK120033228	glmZ	1	1
ECK120014472	glnK-amtB	1	2
ECK120029171	gloB	1	1
ECK120014844	glpABC	1	3
ECK120014845	glpD	1	1
ECK120014723	glpFKX	1	3
ECK120014760	glpTQ	1	2
ECK125095409	glrK	1	1
ECK120014729	gltBDF	1	3
ECK120028061	gltP	1	1
ECK120023669	gltS	1	1
ECK120028186	glvCBG-ysdC	1	4
ECK120014738	glyA	1	1
ECK120014805	glyQS	1	2
ECK120014541	glyVXY	1	3
ECK120014548	glyW-cysT-leuZ	1	3
ECK120029167	gmhB	1	1
ECK120027966	gmk	1	1
ECK120015115	gnd	1	1
ECK120028920	gnsB	1	1
ECK120015106	gntP	1	1
ECK120028206	gpp	1	1
ECK120028331	greB	1	1
ECK120014679	grpE	1	1
ECK120014490	grxA	1	1
ECK120028985	grxB	1	1
ECK120023670	grxD	1	1
ECK120028585	gshA	1	1
ECK120023671	gsk	1	1
ECK125134992	gss	1	1
ECK125141412	gstA	1	1
ECK125134994	gstB	1	1
ECK120014750	guaBA	1	2
ECK120023672	guaC	1	1
ECK120015085	gudPXD	1	3
ECK120014938	gyrA	1	1
ECK120014442	gyrB	1	1
ECK120015912	hcaEFCBD	1	5
ECK120015911	hcaR	1	1
ECK120028541	hcaT	1	1
ECK120028528	hda	1	1
ECK120015101	hdeD	1	1
ECK120023673	hdfR	1	1
ECK120028941	hdhA	1	1
ECK120023674	helD	1	1
ECK120029228	hemB	1	1
ECK120014807	hemCDXY	1	4
ECK120029257	hemH	1	1
ECK120014991	hemN	1	1
ECK120014867	hflD-purB	1	2
ECK125095148	hicAB	1	2
ECK125108698	higBA	1	2
ECK125134997	hinT-ycfL-lpoB-thiK-nagZ-ycfP	1	6
ECK120014808	hipBA	1	2
ECK120014992	hisS	1	1
ECK120014469	hlyE	1	1
ECK120014483	hmp	1	1
ECK120014937	hns	1	1
ECK120030626	hofMNOP	1	4
ECK120028326	hofQ	1	1
ECK120023675	hokA	1	1
ECK120028867	hokB	1	1
ECK120015901	hokE	1	1
ECK120028048	holD-rimI-yjjG	1	3
ECK120028794	holE	1	1
ECK120014426	hpt	1	1
ECK120028863	hrpA	1	1
ECK120029290	hrpB	1	1
ECK120030530	hscBA-fdx-iscX	1	4
ECK120029102	hscC	1	1
ECK120028853	hslJ	1	1
ECK120014811	hslVU	1	2
ECK120028958	hspQ	1	1
ECK120014673	htpX	1	1
ECK120028382	htrL	1	1
ECK120014597	hupA	1	1
ECK120014812	hyaABCDEF	1	6
ECK120014813	hybOABCDEFG	1	8
ECK120015853	hycABCDEFGHI	1	9
ECK120015841	hyfABCDEFGHIJR-focB	1	12
ECK125160701	hypT	1	1
ECK120028415	hyuA	1	1
ECK120029138	iaaA-gsiABCD	1	5
ECK120023676	iap	1	1
ECK120029008	icdC	1	1
ECK120015075	iclR	1	1
ECK120028424	idi	1	1
ECK120015094	idnK	1	1
ECK120014538	ileX	1	1
ECK120028577	ileY	1	1
ECK120014898	ilvC	1	1
ECK120014847	ilvY	1	1
ECK120014417	inaA	1	1
ECK120028965	insA-4AB-4B-4	1	3
ECK120023694	insA-7	1	1
ECK125095414	insAB-1A-1B-1	1	3
ECK125095395	insAB-2A-2B-2-afuBC	1	5
ECK125095396	insAB-3A-3B-3	1	3
ECK125095389	insAB-5A-5B-5	1	3
ECK120028132	insB-7_1B-7_2	1	2
ECK120029226	insC-1CD-1D-1	1	3
ECK120027970	insC-5CD-5D-5-yqiGHI	1	6
ECK120028121	insC-6CD-6D-6	1	3
ECK125095388	insCD-2C-2D-2	1	3
ECK125095391	insCD-3C-3D-3	1	3
ECK125095392	insCD-4C-4D-4-ygeONM	1	6
ECK120029064	insE-3EF-3F-3	1	3
ECK120028629	insE-5EF-5F-5	1	3
ECK125095397	insEF-2E-2F-2	1	3
ECK125095386	insEF-4E-4F-4	1	3
ECK120023695	insG	1	1
ECK120023696	insH-1	1	1
ECK120023697	insH-10	1	1
ECK120023698	insH-11	1	1
ECK120030586	insH-2	1	1
ECK120029104	insH-3	1	1
ECK120028832	insH-4	1	1
ECK120023699	insH-5	1	1
ECK120029376	insH-6	1	1
ECK120030585	insH-7	1	1
ECK120023700	insH-8	1	1
ECK120023701	insH-9	1	1
ECK120028858	insI-2	1	1
ECK120030596	insJ	1	1
ECK120015897	insK	1	1
ECK120029268	insL-1	1	1
ECK120029080	insL-2	1	1
ECK120028502	insL-3	1	1
ECK120028128	insMI-3	1	2
ECK120029190	insN-1I-1O-1	1	3
ECK120028127	insN-2	1	1
ECK120028130	insO-2-yjhWV	1	3
ECK120028564	intA	1	1
ECK120028120	intB	1	1
ECK120023702	intD	1	1
ECK120029202	intF	1	1
ECK120023703	intG	1	1
ECK120028708	intS	1	1
ECK120028512	intZ	1	1
ECK120028534	IS128	1	1
ECK120014418	iscRSUA	1	4
ECK120029391	ispB	1	1
ECK120030616	ispDF	1	2
ECK125095168	ispG-sroE	1	2
ECK120029397	isrB	1	1
ECK120015910	istR-1	1	1
ECK120015909	istR-2	1	1
ECK120014993	katE	1	1
ECK120014848	katG	1	1
ECK120026434	kbaZ-agaVWA	1	4
ECK120014766	kbl-tdh	1	2
ECK120015078	kch	1	1
ECK120015916	kdgK	1	1
ECK120023706	kdgR	1	1
ECK120028243	kdgT	1	1
ECK120014815	kdpDE	1	2
ECK120029377	kdpFABC	1	4
ECK120028396	kduD	1	1
ECK120028397	kduI	1	1
ECK120029274	kefFC	1	2
ECK120028319	kefGB-yheV	1	3
ECK120028552	kgtP	1	1
ECK120030509	kilR-ydaE	1	2
ECK120023707	kptA	1	1
ECK120030521	lafU	1	1
ECK120029024	ldcA	1	1
ECK120014371	ldcC	1	1
ECK120016648	ldhA	1	1
ECK120023708	ldrA	1	1
ECK120023709	ldrB	1	1
ECK120023630	ldrC	1	1
ECK120023626	ldrD	1	1
ECK125203377	ldtA	1	1
ECK125203382	ldtB	1	1
ECK125203379	ldtC	1	1
ECK125203378	ldtD	1	1
ECK125203381	ldtE	1	1
ECK120014817	lepAB	1	2
ECK120028771	leuE	1	1
ECK120014557	leuQPV	1	3
ECK120035064	leuS-lptE-holA-nadD-cobC	1	5
ECK120014542	leuX	1	1
ECK120014851	lexA-dinF	1	2
ECK120030597	lfhA	1	1
ECK125199570	lgoD	1	1
ECK125199568	lgoR	1	1
ECK125199567	lgoT	1	1
ECK120014818	lgt-thyA	1	2
ECK120028505	ligA-ypeB	1	2
ECK120023627	ligB	1	1
ECK120029093	lipA	1	1
ECK120023628	lit	1	1
ECK120014730	livJ	1	1
ECK120026417	lldPRD	1	3
ECK125143518	loiP	1	1
ECK120029149	lolA-rarA	1	2
ECK120028995	lolCDE	1	3
ECK120028849	lomR_2-stfR-tfaR	1	3
ECK120029174	lpcA	1	1
ECK125134988	lpoA	1	1
ECK120034592	lptFG	1	2
ECK120023965	lpxL	1	1
ECK120028802	lpxM	1	1
ECK120014465	lpxP	1	1
ECK120014689	lrhA	1	1
ECK120014728	lrp	1	1
ECK120014731	lysA	1	1
ECK125229262	lysO	1	1
ECK120014969	lysP	1	1
ECK120029120	lysQ	1	1
ECK120014732	lysR	1	1
ECK120014528	lysT-valT-lysW	1	3
ECK120029119	lysZ	1	1
ECK120029252	maa	1	1
ECK120030510	maeA	1	1
ECK120028521	maeB	1	1
ECK120023693	mak	1	1
ECK120014852	malEFG	1	3
ECK120014733	malI	1	1
ECK120014922	malK-lamB-malM	1	3
ECK120014935	malS	1	1
ECK120014899	malT	1	1
ECK120014931	malXY	1	2
ECK120015123	malZ	1	1
ECK120014976	manA	1	1
ECK120014742	manXYZ	1	3
ECK120023692	marC	1	1
ECK120014736	marRAB	1	3
ECK125095178	matP	1	1
ECK125143521	mcaS	1	1
ECK120034517	mcbA	1	1
ECK120034515	mcbR	1	1
ECK120029007	mcrA	1	1
ECK120015128	mcrBC	1	2
ECK120028467	mdaB	1	1
ECK120029248	mdlAB	1	2
ECK120028980	mdtG	1	1
ECK120028986	mdtH	1	1
ECK120028937	mdtJI	1	2
ECK120023690	mdtK	1	1
ECK120028192	mdtL	1	1
ECK120028145	mdtM-yjiN	1	2
ECK120028275	mdtNOP	1	3
ECK120028653	mdtQ	1	1
ECK120014930	melAB	1	2
ECK120014854	melR	1	1
ECK125162046	mepH	1	1
ECK125162054	mepM	1	1
ECK120015057	metBL	1	2
ECK120014737	metC	1	1
ECK120015892	metE	1	1
ECK120014761	metF	1	1
ECK120014413	metK	1	1
ECK120014431	metNIQ	1	3
ECK120014532	metZWV	1	3
ECK120014437	mgrB	1	1
ECK125108927	mgrR	1	1
ECK120028956	mgsA	1	1
ECK120014433	mhpABCDFE	1	6
ECK120029223	mhpT	1	1
ECK120029107	miaB	1	1
ECK120030539	micA	1	1
ECK120023689	micC	1	1
ECK120014444	micF	1	1
ECK120014821	minCDE	1	3
ECK120028763	mipA	1	1
ECK125095177	mlaA	1	1
ECK125095159	mlaFEDCB	1	5
ECK120034516	mliC	1	1
ECK120028648	mlrA	1	1
ECK120028606	mltA	1	1
ECK120028588	mltB	1	1
ECK120029170	mltD	1	1
ECK120034522	mltF	1	1
ECK120029192	mmuPM	1	2
ECK125147418	mnaT-ydcZ	1	2
ECK120015086	mngAB	1	2
ECK120014678	mngR	1	1
ECK120030587	mnmA	1	1
ECK120024058	mnmC	1	1
ECK120030623	mnmE	1	1
ECK120015917	mntH	1	1
ECK125141414	mntP	1	1
ECK120029135	mntR-ybiR	1	2
ECK125095393	mocA	1	1
ECK120029123	modEF	1	2
ECK120014823	moeAB	1	2
ECK120029265	mog	1	1
ECK120028868	mokB	1	1
ECK120029269	mokC-hokC	1	2
ECK120015905	molR_1	1	1
ECK120028641	molR_2	1	1
ECK120028642	molR_3-yehI	1	2
ECK120014824	motAB-cheAW	1	4
ECK120028944	mppA	1	1
ECK120029507	mprA-emrAB	1	3
ECK120028676	mqo	1	1
ECK120023687	mrcA	1	1
ECK120029291	mrcB	1	1
ECK120028639	mrp	1	1
ECK120023686	mrr	1	1
ECK125147436	mscK	1	1
ECK120028312	mscL	1	1
ECK120028437	mscS	1	1
ECK120014572	msrA	1	1
ECK125141416	msrC	1	1
ECK120015887	msyB	1	1
ECK120028008	mtfA	1	1
ECK120014739	mtlADR	1	3
ECK120029293	mtn-btuF-yadS	1	3
ECK120023685	mug	1	1
ECK120028255	murB-birA	1	2
ECK125095145	murJ	1	1
ECK125095153	murR	1	1
ECK120028390	mutH	1	1
ECK120014491	mutS	1	1
ECK120014478	nac	1	1
ECK120028041	nadA-pnuC	1	2
ECK120014740	nadB	1	1
ECK120029285	nadC	1	1
ECK120028751	nadE	1	1
ECK120028560	nadK	1	1
ECK120015081	nagE	1	1
ECK120028996	nagK-cobB	1	2
ECK120028299	nanR	1	1
ECK120014858	narGHJI	1	4
ECK120023684	narP	1	1
ECK120029395	narQ	1	1
ECK120014951	narXL	1	2
ECK120014953	ndh	1	1
ECK120029392	ndk	1	1
ECK120028181	nepI	1	1
ECK120014735	nfo	1	1
ECK120014827	nfrBA	1	2
ECK120030548	nfsB	1	1
ECK120029022	nhaB	1	1
ECK120023683	nhoA	1	1
ECK125229278	nimR	1	1
ECK125229270	nimT	1	1
ECK120023682	nlpA	1	1
ECK120028743	nlpC	1	1
ECK120028286	nlpI	1	1
ECK120014583	nmpC	1	1
ECK120030544	nohA-ydfN-tfaQ	1	3
ECK120029073	nohB	1	1
ECK120015082	norVW	1	2
ECK120014362	nrdHIEF	1	4
ECK120014744	nrfABCDEFG	1	7
ECK120028257	nudC-hemE-nfi	1	3
ECK120023680	nudE	1	1
ECK120027968	nudF-yqiB-cpdA-yqiA-parE	1	5
ECK120023679	nudG	1	1
ECK120023766	nudI	1	1
ECK120028523	nudK	1	1
ECK120014944	nupC	1	1
ECK120028662	nupX	1	1
ECK120030580	ogrK	1	1
ECK125095165	ohsC	1	1
ECK120014863	ompF	1	1
ECK120029046	ompG	1	1
ECK120028231	ompL	1	1
ECK120023678	ompW	1	1
ECK120023636	omrA	1	1
ECK120023635	omrB	1	1
ECK125165366	opgB	1	1
ECK125165373	opgC	1	1
ECK125165355	opgD	1	1
ECK125165374	opgE	1	1
ECK120014764	oppABCDF	1	5
ECK120028094	orn	1	1
ECK125229265	ortT	1	1
ECK120014671	osmE	1	1
ECK120014423	osmY	1	1
ECK120014864	oxyR	1	1
ECK120020942	oxyS	1	1
ECK120014600	paaABCDEFGHIJK	1	11
ECK120014488	paaXY	1	2
ECK120014589	paaZ	1	1
ECK120030500	pabB-nudL	1	2
ECK120028990	pabC-yceG-tmk-holB-ycfH	1	5
ECK120015871	pagP	1	1
ECK120014828	panBC	1	2
ECK120029239	panE-yajL	1	2
ECK125160629	panZ	1	1
ECK125141410	paoABCD	1	4
ECK120028463	parC	1	1
ECK125160623	patA	1	1
ECK120028406	pbl	1	1
ECK120028650	pbpG	1	1
ECK120026422	pck	1	1
ECK125229255	pdeA	1	1
ECK125229260	pdeB	1	1
ECK125229275	pdeC	1	1
ECK125229271	pdeD	1	1
ECK125229281	pdeF	1	1
ECK125229264	pdeG	1	1
ECK125229286	pdeH	1	1
ECK125229261	pdeI-dgcI	1	2
ECK125229287	pdeK	1	1
ECK125229254	pdeN	1	1
ECK125229285	pdeR	1	1
ECK120020944	pdxK	1	1
ECK120028537	pepB	1	1
ECK120020945	pepE	1	1
ECK120020946	pepN	1	1
ECK120028224	pepQ-yigZ-trkH-hemG	1	4
ECK120020947	pepT	1	1
ECK120029189	perR	1	1
ECK120029152	pflA	1	1
ECK120014611	pflDC	1	2
ECK120017008	pgaABCD	1	4
ECK120014981	pgi	1	1
ECK120015881	pgl	1	1
ECK120029038	pgpB	1	1
ECK125134998	pgpC-tadA	1	2
ECK125160635	pgrR	1	1
ECK120029398	pgsA	1	1
ECK120014612	pheLA	1	2
ECK120015886	pheP	1	1
ECK120014556	pheU	1	1
ECK120014537	pheV	1	1
ECK120014865	phoA-psiF	1	2
ECK120014866	phoBR	1	2
ECK120014895	phoE	1	1
ECK120030516	pinE	1	1
ECK120028574	pinH	1	1
ECK120028014	pinQ	1	1
ECK120028850	pinR	1	1
ECK120020948	pitA	1	1
ECK120028452	pitB	1	1
ECK125135280	plaP	1	1
ECK120028215	pldA	1	1
ECK120028218	pldB-yigL	1	2
ECK125134995	pliG	1	1
ECK120029389	plsC	1	1
ECK120028109	pmbA	1	1
ECK120028685	pmrD	1	1
ECK120014741	pncB	1	1
ECK125141418	pncC	1	1
ECK120014614	pntAB	1	2
ECK120014480	polA	1	1
ECK120015928	polB	1	1
ECK120014615	potABCD	1	4
ECK120020949	ppa	1	1
ECK120014996	ppc	1	1
ECK120029284	ppdD-hofBC	1	3
ECK120015042	pphA	1	1
ECK120028589	pphB	1	1
ECK120029056	ppiB-lpxH	1	2
ECK120028204	ppiC	1	1
ECK120028448	pppA	1	1
ECK120014712	ppsA	1	1
ECK125108695	ppsR	1	1
ECK120028889	pptA	1	1
ECK120028896	pqqL	1	1
ECK125134999	preTA	1	2
ECK120028158	prfC	1	1
ECK120029383	priA	1	1
ECK120029254	priC-ybaM	1	2
ECK120028321	prkB	1	1
ECK125141395	prlC-rsmJ	1	2
ECK125141394	prlF-yhaV	1	2
ECK125147422	prmB-aroC-mepA-yfcA-epmC-yfcL	1	6
ECK120014619	proBA	1	2
ECK120020950	proC	1	1
ECK120014555	proK	1	1
ECK120014530	proL	1	1
ECK120028786	proQ-prc	1	2
ECK120015004	proS	1	1
ECK120015937	prpBCDE	1	4
ECK120015913	prpR	1	1
ECK125147428	psd-mscM	1	2
ECK120014425	psiE	1	1
ECK120015129	pspG	1	1
ECK120030540	psrO	1	1
ECK120028550	pssA	1	1
ECK125147421	psuKG	1	2
ECK125160636	psuT	1	1
ECK120028796	ptrB	1	1
ECK120028251	ptsA-fsaB-gldA	1	3
ECK120014902	purA	1	1
ECK120014868	purC	1	1
ECK120014893	purEK	1	2
ECK120014869	purHD	1	2
ECK120014870	purL	1	1
ECK120014871	purMN	1	2
ECK120014872	purR	1	1
ECK120020951	purT	1	1
ECK120014582	putA	1	1
ECK120014873	pyrC	1	1
ECK120014874	pyrD	1	1
ECK120014361	pyrH	1	1
ECK120029050	qmcA-ybbJ	1	2
ECK120029380	qor	1	1
ECK120014511	queA	1	1
ECK120029245	queC	1	1
ECK125095152	queD	1	1
ECK125141400	queE	1	1
ECK120028602	queF	1	1
ECK125135285	queG	1	1
ECK120028840	racC	1	1
ECK120028843	racR	1	1
ECK125203372	radD	1	1
ECK120030495	raiA	1	1
ECK125166142	ralA	1	1
ECK120028213	rarD	1	1
ECK125135281	ratAB	1	2
ECK120028201	ravA-viaA	1	2
ECK125141393	rayT	1	1
ECK120030493	rbn	1	1
ECK120015851	rbsDACBKR	1	6
ECK125160632	rcdA	1	1
ECK125165353	rclR	1	1
ECK120028634	rcnR	1	1
ECK120014522	rcsA	1	1
ECK120014622	rcsC	1	1
ECK125199566	rcsF-trmO	1	2
ECK120020952	rdgC	1	1
ECK120020953	rdlA	1	1
ECK120020954	rdlB	1	1
ECK120020955	rdlC	1	1
ECK120028361	rdlD	1	1
ECK125199565	recET-ralR-ydaCQ-intR	1	6
ECK120015934	recN	1	1
ECK120028216	recQ	1	1
ECK120028923	rem	1	1
ECK120014997	rep	1	1
ECK120028475	rfaE	1	1
ECK120020956	rfaH	1	1
ECK125203374	rfe-wzzE-wecBC-rffGHCA-wzxE-rffT-wzyE-rffM	1	12
ECK120030603	rhaM	1	1
ECK120014876	rhaSR	1	2
ECK120014753	rhaT	1	1
ECK120028207	rhlB	1	1
ECK120020957	rhlE	1	1
ECK120028344	rhsB	1	1
ECK120029112	rhsC-ybfB	1	2
ECK120029053	rhsD-ybbC-ylbH-ybbD	1	4
ECK120028885	rhsE-ydcD	1	2
ECK120028045	rhtA	1	1
ECK120020958	rhtB	1	1
ECK120028217	rhtC	1	1
ECK120020961	ribC	1	1
ECK125141396	ridA	1	1
ECK120029103	rihA	1	1
ECK120014507	rihB	1	1
ECK120029272	rihC	1	1
ECK120015903	rimJ	1	1
ECK120014975	rimL	1	1
ECK120034520	rimO	1	1
ECK125141415	rlmA	1	1
ECK125095160	rlmD	1	1
ECK120034089	rlmF	1	1
ECK120028482	rlmG	1	1
ECK125095149	rlmI	1	1
ECK125147430	rlmJ	1	1
ECK120026442	rlmL-uup	1	2
ECK125095167	rlmM	1	1
ECK120034100	rlmN	1	1
ECK120029036	rluB	1	1
ECK120028989	rluC	1	1
ECK120028553	rluD-yfiH	1	2
ECK120028999	rluE-nudJ	1	2
ECK120020962	rluF	1	1
ECK120028220	rmuC	1	1
ECK120029086	rna	1	1
ECK120030581	rnd	1	1
ECK120015014	rnhA	1	1
ECK120029085	rnk	1	1
ECK120015869	rob	1	1
ECK125095169	rodZ	1	1
ECK125166143	roxA	1	1
ECK120015918	rpiA	1	1
ECK120033183	rpiB	1	1
ECK120014630	rplNXE-rpsNH-rplFR-rpsE-rpmD-rplO-secY-rpmJ	1	12
ECK120014631	rplU-rpmA	1	2
ECK120028674	rplY	1	1
ECK120020963	rpmE	1	1
ECK120034088	rppH-ptsP	1	2
ECK120028735	rprA	1	1
ECK120014635	rpsF-priB-rpsR-rplI	1	4
ECK120014636	rpsJ-rplCDWB-rpsS-rplV-rpsC-rplP-rpmC-rpsQ	1	11
ECK120014639	rpsP-rimM-trmD-rplS	1	4
ECK120029510	rseP	1	1
ECK120030559	rseX	1	1
ECK125147414	rsfS-rlmH-mrdAB-rlpA	1	5
ECK120028093	rsgA	1	1
ECK120030582	rsmB	1	1
ECK120028157	rsmC	1	1
ECK120029504	rsmD-yhhL	1	2
ECK120028440	rsmE-gshB	1	2
ECK120028789	rsmF	1	1
ECK125108709	rsmI	1	1
ECK120028930	rspAB	1	2
ECK120015867	rstAB	1	2
ECK120028672	rsuA	1	1
ECK120014475	rtcBA	1	2
ECK120016642	rtcR	1	1
ECK120029401	rttR	1	1
ECK120016677	rutABCDEFG	1	7
ECK125147426	rybA-mntS	1	2
ECK120027959	rybB	1	1
ECK120028732	rydB	1	1
ECK120030766	rydC	1	1
ECK120020965	ryeA	1	1
ECK120028535	ryfA	1	1
ECK120033115	ryfD	1	1
ECK120026441	ryhB	1	1
ECK120026431	ryjA	1	1
ECK120033116	ryjB	1	1
ECK120029070	rzoD	1	1
ECK120028845	rzoR	1	1
ECK120034594	sad	1	1
ECK120028657	sanA-yeiS	1	2
ECK120028034	sapABCDF	1	5
ECK125162048	satP	1	1
ECK120014999	sbcB	1	1
ECK120029235	sbcDC	1	2
ECK120016675	sbmA-yaiW	1	2
ECK120028246	sbp	1	1
ECK120030543	scpA-argK-scpBC	1	4
ECK120014765	sdaA	1	1
ECK120014701	sdaCB	1	2
ECK125165369	sdhE-cptA	1	2
ECK125141417	sdsR	1	1
ECK120014641	secE-nusG	1	2
ECK120015076	secMA-mutT	1	3
ECK120014642	selAB	1	2
ECK120028388	selC	1	1
ECK120015938	seqA-pgm	1	2
ECK120029150	serS	1	1
ECK120014545	serT	1	1
ECK120014549	serU	1	1
ECK120014544	serW	1	1
ECK120014546	serX	1	1
ECK120028052	setB	1	1
ECK120028277	setC	1	1
ECK120029059	sfmA	1	1
ECK120029060	sfmCD	1	2
ECK120029061	sfmHF	1	2
ECK120028290	sfsB	1	1
ECK120028136	sgcXBCQAER	1	7
ECK120034101	sgrST-setA	1	3
ECK120028825	shiA	1	1
ECK125143519	shoB	1	1
ECK125095150	sibA	1	1
ECK125095151	sibB	1	1
ECK125095172	sibC	1	1
ECK125095158	sibD	1	1
ECK125095171	sibE	1	1
ECK120020966	sieB	1	1
ECK120015045	sixA	1	1
ECK120033227	slp-dctR	1	2
ECK120028163	slt	1	1
ECK120020968	slyA	1	1
ECK120028318	slyD	1	1
ECK120020969	slyX	1	1
ECK120029996	smf	1	1
ECK120029997	smg	1	1
ECK120028562	smpB	1	1
ECK125141403	smrA	1	1
ECK125141404	smrB	1	1
ECK120014575	smtA-mukFEB	1	4
ECK120014877	sodA	1	1
ECK120014407	sodB	1	1
ECK120028721	sodC	1	1
ECK120028869	sokB	1	1
ECK120029270	sokC	1	1
ECK120028982	solA-yceO	1	2
ECK120014703	soxR	1	1
ECK120014755	soxS	1	1
ECK120014923	speC	1	1
ECK120014647	speF-potE	1	2
ECK120014502	spf	1	1
ECK120028755	sppA	1	1
ECK120016678	spy	1	1
ECK120020971	sraA	1	1
ECK125165367	sraB	1	1
ECK120020977	srmB	1	1
ECK125095157	sroG-ribB	1	2
ECK120028256	sroH	1	1
ECK120020982	sseA	1	1
ECK120028536	sseB	1	1
ECK120014648	sspAB	1	2
ECK120028563	ssrA	1	1
ECK120027973	sstT	1	1
ECK120015010	ssuEADCB	1	5
ECK120028023	stfE-tfaE	1	2
ECK120015926	sthA	1	1
ECK120014443	sufABCDSE	1	6
ECK120014383	sugE	1	1
ECK120028539	suhB	1	1
ECK120014879	sulA	1	1
ECK125203380	sutR	1	1
ECK120029509	sxy	1	1
ECK120027988	syd	1	1
ECK120033111	symE	1	1
ECK120033112	symR	1	1
ECK125095164	tabA	1	1
ECK120027960	tag-yiaC	1	2
ECK120015882	talB	1	1
ECK125143517	tamAB-ytfP	1	3
ECK120021004	tar-tap-cheRBYZ	1	6
ECK120028393	tas	1	1
ECK120029092	tatE	1	1
ECK120014579	tauABCD	1	4
ECK125160633	tcdA	1	1
ECK125229267	tcyP	1	1
ECK120028492	tdcR	1	1
ECK120020983	tdk	1	1
ECK120014651	tehAB	1	2
ECK120028074	tesA-ybbO	1	2
ECK120020984	tesB	1	1
ECK120029074	tfaD	1	1
ECK120028710	tfaS	1	1
ECK120030518	tfaX	1	1
ECK120035055	tff-rpsB-tsf	1	3
ECK120014652	thiCEFSGH	1	6
ECK120020985	thiI	1	1
ECK120028633	thiMD	1	2
ECK125203375	thpR	1	1
ECK120029991	thrU-tyrU-glyT-thrT-tufB	1	5
ECK120014526	thrW	1	1
ECK120029162	tilS	1	1
ECK125095174	tisB	1	1
ECK120029388	tktA	1	1
ECK120028306	tldD	1	1
ECK120035065	tomB-hha	1	2
ECK120014717	tonB	1	1
ECK120014756	torCAD	1	3
ECK120028000	torI	1	1
ECK120014499	torR	1	1
ECK120029410	torS	1	1
ECK120020986	torT	1	1
ECK120014485	torYZ	1	2
ECK120020987	tp2	1	1
ECK120028717	tpke70	1	1
ECK120014607	tpx	1	1
ECK120020988	tqsA	1	1
ECK120014670	treA	1	1
ECK120014757	treBC	1	2
ECK120016652	treF	1	1
ECK120014397	trg	1	1
ECK120028311	trkA	1	1
ECK120028846	trkG	1	1
ECK120014691	trmA	1	1
ECK120030492	trmI-yggL	1	2
ECK120028538	trmJ	1	1
ECK125134984	trmL	1	1
ECK120014763	trpR	1	1
ECK120030594	trpT	1	1
ECK120030617	truD	1	1
ECK120029148	trxB	1	1
ECK120014451	trxC	1	1
ECK125147423	tsaD	1	1
ECK120028322	tsgA	1	1
ECK120030508	ttcA	1	1
ECK120029992	ttdABT	1	3
ECK120029378	ttdR	1	1
ECK120028021	tus	1	1
ECK120020967	tusA	1	1
ECK120028960	tusE	1	1
ECK120028228	typA	1	1
ECK120014896	tyrB	1	1
ECK125143525	uacT	1	1
ECK120014655	ubiCA	1	2
ECK120028223	ubiD	1	1
ECK120020989	ubiF	1	1
ECK120014925	ubiG	1	1
ECK120014932	udp	1	1
ECK120028618	ugd	1	1
ECK120014929	uhpT	1	1
ECK120026438	uidABC	1	3
ECK120015114	uidR	1	1
ECK120015116	ulaABCDEF	1	6
ECK120015117	ulaG	1	1
ECK120028100	ulaR	1	1
ECK125162055	umpG-pcm	1	2
ECK120014727	umuDC	1	2
ECK120015001	ung	1	1
ECK120014693	upp-uraA	1	2
ECK120020990	ushA	1	1
ECK120014380	uspB	1	1
ECK120020991	uspC	1	1
ECK120028834	uspE	1	1
ECK120028852	uspF	1	1
ECK120020992	uspG	1	1
ECK120014881	uvrA	1	1
ECK120014562	uxuAB	1	2
ECK120015110	uxuR	1	1
ECK120014531	valUXY-lysV	1	4
ECK120014529	valVW	1	2
ECK120029118	valZ-lysY	1	2
ECK120015920	ves	1	1
ECK120030551	wbbIJK	1	3
ECK120028619	wbbL_2	1	1
ECK120030497	wcaCDEF-gmd-fcl-gmm-wcaI-cpsBG-wcaJ-wzxC	1	12
ECK120028620	wcaKLM	1	3
ECK120026427	wecH	1	1
ECK120028969	wrbA-yccJ	1	2
ECK125147419	wzzB	1	1
ECK125108701	xanP	1	1
ECK125165368	xanQ-guaD-ghxQ	1	3
ECK120014578	xapAB	1	2
ECK120014599	xseA	1	1
ECK120014606	xthA	1	1
ECK120014481	xylAB	1	2
ECK120028264	xylE	1	1
ECK120029263	yaaA	1	1
ECK120020994	yaaI	1	1
ECK120029264	yaaJ	1	1
ECK120029273	yaaU	1	1
ECK120029267	yaaW	1	1
ECK120029262	yaaX	1	1
ECK120029277	yabI	1	1
ECK120029276	yabPQ	1	2
ECK120028070	yacC-speED	1	3
ECK120020995	yacH	1	1
ECK120029286	yacL	1	1
ECK120020996	yadD	1	1
ECK120029288	yadE	1	1
ECK120029287	yadGH	1	2
ECK120029415	yadI	1	1
ECK120030606	yadN	1	1
ECK120029165	yaeF	1	1
ECK120029156	yaeH	1	1
ECK120029157	yaeI	1	1
ECK120029163	yaeP-rof	1	2
ECK125147412	yaeQ-arfB-nlpE	1	3
ECK120029161	yaeR	1	1
ECK120020997	yafC	1	1
ECK120029169	yafDE	1	2
ECK120020998	yafF	1	1
ECK120029175	yafJ	1	1
ECK120029176	yafK	1	1
ECK120029178	yafL	1	1
ECK120020999	yafS	1	1
ECK120029172	yafT	1	1
ECK120021000	yafU	1	1
ECK120021001	yafV	1	1
ECK120029194	yagAB-ykgN	1	3
ECK120029195	yagEF	1	2
ECK120029196	yagGH	1	2
ECK120029197	yagI	1	1
ECK120021002	yagJ	1	1
ECK120029199	yagK	1	1
ECK120029200	yagML	1	2
ECK120029201	yagN	1	1
ECK120029203	yagP	1	1
ECK120020932	yagU	1	1
ECK120029217	yahB	1	1
ECK120029218	yahC	1	1
ECK120029219	yahH	1	1
ECK120029220	yahIJ	1	2
ECK120029411	yahK	1	1
ECK120029221	yahL	1	1
ECK120029222	yahM	1	1
ECK120020910	yahN	1	1
ECK120020911	yahO	1	1
ECK120029234	yaiE	1	1
ECK120029227	yaiF	1	1
ECK120029233	yaiI	1	1
ECK120029224	yaiL	1	1
ECK120027948	yaiP	1	1
ECK120015077	yaiS	1	1
ECK120020912	yaiT	1	1
ECK120029230	yaiU	1	1
ECK120029231	yaiV	1	1
ECK120027947	yaiXO	1	2
ECK120020916	yaiZ	1	1
ECK120029237	yajD	1	1
ECK120027951	yajI	1	1
ECK120020917	yajQ	1	1
ECK120029240	yajR	1	1
ECK120029250	ybaA	1	1
ECK120027957	ybaB-recR	1	2
ECK120027954	ybaE	1	1
ECK120020918	ybaK	1	1
ECK120029258	ybaL	1	1
ECK120029255	ybaN	1	1
ECK120029247	ybaO	1	1
ECK120020979	ybaP	1	1
ECK120020980	ybaQ	1	1
ECK120028084	ybaST	1	2
ECK120029243	ybaV	1	1
ECK120020914	ybaY	1	1
ECK120029052	ybbAP	1	2
ECK120030602	ybbB	1	1
ECK120016650	ybbN	1	1
ECK120029062	ybcC	1	1
ECK120029063	ybcD	1	1
ECK120030588	ybcH	1	1
ECK120029057	ybcI	1	1
ECK120029066	ybcK	1	1
ECK120029067	ybcLM	1	2
ECK120029068	ybcN-ninE-ybcO-rusA-ylcG	1	5
ECK120029069	ybcQ	1	1
ECK120029071	ybcV	1	1
ECK120029072	ybcW	1	1
ECK120020919	ybcY	1	1
ECK120029081	ybdD	1	1
ECK120029077	ybdF	1	1
ECK120029076	ybdG	1	1
ECK120020920	ybdH	1	1
ECK120029078	ybdJ	1	1
ECK120029079	ybdK	1	1
ECK120020921	ybdL	1	1
ECK120029082	ybdM	1	1
ECK120029083	ybdN	1	1
ECK120029084	ybdO	1	1
ECK120029381	ybdR	1	1
ECK120029094	ybeF	1	1
ECK120020922	ybeL	1	1
ECK125108699	ybeM_1M_2	1	2
ECK120020923	ybeQ	1	1
ECK120029100	ybeR-djlB	1	2
ECK120020924	ybeT	1	1
ECK120029101	ybeU-djlC	1	2
ECK120029111	ybfA	1	1
ECK120029115	ybfD	1	1
ECK120015900	ybfE	1	1
ECK120029110	ybfF	1	1
ECK120016655	ybfHG	1	2
ECK120029114	ybfL	1	1
ECK120028039	ybfOC	1	2
ECK120028038	ybfP	1	1
ECK120029113	ybfQ	1	1
ECK120029117	ybgD	1	1
ECK120028040	ybgQPO	1	3
ECK120029122	ybgS	1	1
ECK120020926	ybhA	1	1
ECK120029126	ybhB	1	1
ECK120029125	ybhC	1	1
ECK120020927	ybhD	1	1
ECK120028042	ybhH	1	1
ECK120029408	ybhI	1	1
ECK120029409	ybhJ	1	1
ECK120014966	ybhK	1	1
ECK120029127	ybhL	1	1
ECK120029128	ybhM	1	1
ECK125160624	ybhP-clsB-ybhN	1	3
ECK120020928	ybhQ	1	1
ECK120020929	ybiA	1	1
ECK120030591	ybiB	1	1
ECK120029130	ybiC	1	1
ECK120029129	ybiH-ybhGFSR	1	5
ECK120029131	ybiI	1	1
ECK120028044	ybiJ	1	1
ECK120029134	ybiO	1	1
ECK120020960	ybiT	1	1
ECK120029136	ybiU	1	1
ECK120029137	ybiV	1	1
ECK120029132	ybiX	1	1
ECK120028046	ybiYW	1	2
ECK120023870	ybjD	1	1
ECK120015872	ybjG	1	1
ECK120029142	ybjH	1	1
ECK120029143	ybjJI	1	2
ECK120029144	ybjL	1	1
ECK120023758	ybjM	1	1
ECK125095147	ybjO-rlmC	1	2
ECK120015890	ybjP	1	1
ECK120033106	ybjQ-amiD	1	2
ECK120027942	ybjS	1	1
ECK120023952	ybjX	1	1
ECK120016679	ycaC	1	1
ECK120027944	ycaD	1	1
ECK120028037	ycaI-msbA-lpxK-ycaQ	1	4
ECK120023710	ycaK	1	1
ECK120027945	ycaL	1	1
ECK120007527	ycaM	1	1
ECK120023711	ycaN	1	1
ECK120029153	ycaO	1	1
ECK120029154	ycaP	1	1
ECK120028945	ycaR-kdsB	1	2
ECK120028946	ycbJ	1	1
ECK125229263	ycbK-gloC	1	2
ECK120023714	ycbX	1	1
ECK120028954	ycbZ	1	1
ECK120028961	yccA	1	1
ECK120028968	yccE	1	1
ECK120028955	yccFS	1	2
ECK120028967	yccM	1	1
ECK120028957	yccT	1	1
ECK120023716	yccU	1	1
ECK120023717	yccX	1	1
ECK120028975	ycdXY	1	2
ECK120028976	ycdZ	1	1
ECK120015027	yceA	1	1
ECK120028984	yceB	1	1
ECK120023719	yceF	1	1
ECK120030576	yceH	1	1
ECK120028979	yceK	1	1
ECK120030577	yceM	1	1
ECK120028988	yceQ	1	1
ECK120028992	ycfJ	1	1
ECK120028994	ycfT	1	1
ECK120023722	ycgB	1	1
ECK120029016	ycgH_1	1	1
ECK120029017	ycgH_2	1	1
ECK120023723	ycgJ	1	1
ECK120029019	ycgL	1	1
ECK120029020	ycgM	1	1
ECK120028027	ycgN	1	1
ECK120014402	ycgR	1	1
ECK120029026	ycgV	1	1
ECK120028024	ycgX	1	1
ECK120029025	ycgY	1	1
ECK120029031	ychE	1	1
ECK120028297	ychE_2-yhcF	1	2
ECK120029030	ychG_1G_2	1	2
ECK120023725	ychH	1	1
ECK120029029	ychJ	1	1
ECK120023726	ychN	1	1
ECK120023727	ychO	1	1
ECK120029028	ychS	1	1
ECK120029033	yciA	1	1
ECK120029034	yciCB	1	2
ECK120029032	yciI	1	1
ECK120028032	yciK-btuR	1	2
ECK120023728	yciN	1	1
ECK120029035	yciVOQ	1	3
ECK120029040	yciW	1	1
ECK120028053	yciY	1	1
ECK120029042	ycjD	1	1
ECK120023729	ycjG	1	1
ECK120033105	ycjMNOPQRSTUV-ymjB	1	11
ECK120023730	ycjW	1	1
ECK120028842	ydaGF	1	2
ECK120028836	ydaN	1	1
ECK120028844	ydaSTUVW-rzpR	1	6
ECK120028856	ydbA_1	1	1
ECK120028859	ydbA_2	1	1
ECK120028860	ydbC	1	1
ECK120028861	ydbD	1	1
ECK120028854	ydbH-ynbE-ydbL	1	3
ECK120023733	ydbJ	1	1
ECK120028866	ydcA	1	1
ECK120028888	ydcC	1	1
ECK120028864	ydcF	1	1
ECK120028872	ydcH	1	1
ECK120023735	ydcI	1	1
ECK120028870	ydcJ	1	1
ECK120023736	ydcK	1	1
ECK120028873	ydcL	1	1
ECK120028177	ydcM	1	1
ECK120023737	ydcO	1	1
ECK120028875	ydcP	1	1
ECK120028877	ydcR	1	1
ECK120028880	ydcY	1	1
ECK120028897	yddAB	1	2
ECK120028890	yddE	1	1
ECK120028892	yddG	1	1
ECK120023738	yddH	1	1
ECK120028891	yddLKJ	1	3
ECK120028893	yddM	1	1
ECK120028895	yddW	1	1
ECK120014389	ydeA	1	1
ECK120023740	ydeE	1	1
ECK120023741	ydeJ	1	1
ECK120028904	ydeK	1	1
ECK120015860	ydeP	1	1
ECK120028900	ydeQ	1	1
ECK120028901	ydeTSR	1	3
ECK120028903	ydeU	1	1
ECK125165356	ydfABC	1	3
ECK120028013	ydfG	1	1
ECK120028915	ydfH	1	1
ECK120028917	ydfI	1	1
ECK120028918	ydfJ	1	1
ECK120028919	ydfK	1	1
ECK120028016	ydfUT	1	2
ECK120028926	ydfV	1	1
ECK120028916	ydfZ	1	1
ECK120028940	ydgA	1	1
ECK120023742	ydgC	1	1
ECK120028020	ydgD	1	1
ECK120028938	ydgH	1	1
ECK120028939	ydgI-folM	1	2
ECK120023743	ydgJ	1	1
ECK120016662	ydhB	1	1
ECK120028725	ydhC	1	1
ECK120028722	ydhF	1	1
ECK120016770	ydhIJK	1	3
ECK120028723	ydhL	1	1
ECK120016663	ydhP	1	1
ECK120023744	ydhQ	1	1
ECK120028726	ydhR	1	1
ECK120028727	ydhS	1	1
ECK120028730	ydhZ	1	1
ECK120028741	ydiE	1	1
ECK120028739	ydiFO	1	2
ECK125160705	ydiJ-menI-ydiH	1	3
ECK120028734	ydiK	1	1
ECK120028736	ydiL	1	1
ECK120028737	ydiM	1	1
ECK120028738	ydiNB-aroD	1	3
ECK120023745	ydiP	1	1
ECK120015121	ydiQRST-fadK	1	5
ECK120020941	ydiU	1	1
ECK120028742	ydiV	1	1
ECK120023746	ydiY	1	1
ECK120028746	ydiZ	1	1
ECK120028756	ydjE	1	1
ECK120028757	ydjF	1	1
ECK120028758	ydjLKJIHG	1	6
ECK120015896	ydjM	1	1
ECK120028750	ydjO	1	1
ECK120028752	ydjXYZ-ynjABCD	1	7
ECK120028759	yeaC	1	1
ECK120028762	yeaE	1	1
ECK120028766	yeaK	1	1
ECK120023747	yeaL	1	1
ECK120028768	yeaO	1	1
ECK120028769	yeaQ	1	1
ECK120028770	yeaR-yoaG	1	2
ECK120028774	yeaVW	1	2
ECK120028775	yeaX	1	1
ECK120028797	yebE	1	1
ECK120028798	yebF	1	1
ECK120028799	yebG	1	1
ECK120028800	yebK	1	1
ECK120028785	yebO	1	1
ECK120023750	yebQ	1	1
ECK120028788	yebST	1	2
ECK120028790	yebV	1	1
ECK120028791	yebW	1	1
ECK120028808	yecA	1	1
ECK120028803	yecDE	1	2
ECK120023751	yecF	1	1
ECK120023752	yecH	1	1
ECK120028003	yecJ	1	1
ECK125203376	yecM-cutC	1	2
ECK120030496	yecN-cmoAB	1	3
ECK120016687	yecR	1	1
ECK120028804	yecT	1	1
ECK120023753	yedA	1	1
ECK120023754	yedD	1	1
ECK120028810	yedEF	1	2
ECK120028816	yedI	1	1
ECK120028811	yedK	1	1
ECK120028812	yedL	1	1
ECK120028813	yedM	1	1
ECK120028005	yedN_1N_2	1	2
ECK120023755	yedP	1	1
ECK120028006	yedRJ	1	2
ECK120028817	yedS_1S_2	1	2
ECK120028818	yedS_3	1	1
ECK120028819	yedWV	1	2
ECK120028820	yedX	1	1
ECK120028821	yedYZ	1	2
ECK120028609	yeeA	1	1
ECK120028612	yeeED	1	2
ECK120028823	yeeJ	1	1
ECK120028824	yeeL_1L_2	1	2
ECK120028009	yeeN	1	1
ECK120028826	yeeO	1	1
ECK120028829	yeeP	1	1
ECK125143524	yeeRST-cbeA-cbtA-yeeW	1	6
ECK120028608	yeeX	1	1
ECK120028614	yeeY	1	1
ECK120028615	yeeZ	1	1
ECK120028616	yefM-yoeB	1	2
ECK120023756	yegD	1	1
ECK120023759	yegH	1	1
ECK120023760	yegI	1	1
ECK120023761	yegJ	1	1
ECK120028623	yegLK	1	2
ECK120028626	yegP	1	1
ECK120028627	yegQ	1	1
ECK120016670	yegRZ	1	2
ECK120016659	yegS	1	1
ECK120028630	yegTUV	1	3
ECK120028631	yegW	1	1
ECK120028632	yegX	1	1
ECK120028637	yehDCBA	1	4
ECK120028638	yehE	1	1
ECK120028643	yehK	1	1
ECK120028644	yehLMPQ	1	4
ECK120028645	yehR	1	1
ECK120028646	yehS	1	1
ECK120028647	yehUT	1	2
ECK120028660	yeiE	1	1
ECK120023762	yeiG	1	1
ECK120028661	yeiH	1	1
ECK120030608	yeiI	1	1
ECK120028665	yeiP	1	1
ECK120028666	yeiQ	1	1
ECK120034099	yeiR-lpxT	1	2
ECK120028173	yeiW	1	1
ECK120028670	yejABEF	1	4
ECK120023763	yejK	1	1
ECK120028675	yejLM	1	2
ECK120016688	yejO	1	1
ECK120028680	yfaATS_1S_2QP	1	6
ECK120028681	yfaD-ypaA	1	2
ECK120023764	yfaH	1	1
ECK120023765	yfaL	1	1
ECK120028683	yfaY	1	1
ECK120028684	yfaZ	1	1
ECK120023767	yfbK	1	1
ECK120028690	yfbL	1	1
ECK120027993	yfbM	1	1
ECK120023768	yfbN	1	1
ECK120028691	yfbO	1	1
ECK120028692	yfbP	1	1
ECK120027994	yfbS	1	1
ECK120028695	yfbUT	1	2
ECK120028696	yfbV	1	1
ECK120028697	yfcC	1	1
ECK120028698	yfcD	1	1
ECK120027995	yfcE	1	1
ECK120028699	yfcF	1	1
ECK120028700	yfcG	1	1
ECK120027996	yfcI	1	1
ECK120028703	yfcJ	1	1
ECK120028704	yfcUTSRQPO	1	7
ECK120028705	yfcV	1	1
ECK120028706	yfcZ	1	1
ECK120028707	yfdC	1	1
ECK120027998	yfdF	1	1
ECK120028709	yfdGHI	1	3
ECK120027999	yfdONMLK	1	5
ECK120028711	yfdPQ	1	2
ECK120028712	yfdRST	1	3
ECK120023770	yfdY	1	1
ECK120028504	yfeCD	1	2
ECK120023771	yfeH	1	1
ECK120016680	yfeKS	1	2
ECK120023772	yfeN	1	1
ECK120028500	yfeO	1	1
ECK120023773	yfeR	1	1
ECK120016676	yfeYX	1	2
ECK120028513	yffL	1	1
ECK120028514	yffMN	1	2
ECK120028515	yffOP	1	2
ECK120028516	yffQR	1	2
ECK120028517	yffS	1	1
ECK120028529	yfgG	1	1
ECK120028530	yfgHI	1	2
ECK120028531	yfgJ	1	1
ECK120023775	yfgO	1	1
ECK120030550	yfhG	1	1
ECK120028547	yfhH	1	1
ECK120028548	yfhL	1	1
ECK120028533	yfhM-pbpC	1	2
ECK120028540	yfhR	1	1
ECK120023776	yfiC	1	1
ECK120023777	yfiE	1	1
ECK120023778	yfiF	1	1
ECK120028555	yfiL	1	1
ECK120028551	yfiM	1	1
ECK120028559	yfjD	1	1
ECK120023780	yfjH	1	1
ECK120028565	yfjI	1	1
ECK120028566	yfjJ	1	1
ECK120028568	yfjM	1	1
ECK120028569	yfjPQ	1	2
ECK120028570	yfjR-ypjK-yfjST	1	4
ECK120028572	yfjW	1	1
ECK120027980	yfjXY-ypjJ-yfjZ-ypjF	1	5
ECK120014464	ygaC	1	1
ECK120028583	ygaM	1	1
ECK125108705	ygaQ_1Q_2	1	2
ECK125108706	ygaQ_3	1	1
ECK125108707	ygaQ_4	1	1
ECK120027981	ygaU	1	1
ECK120028582	ygaVP	1	2
ECK120028584	ygaXY	1	2
ECK120027982	ygaZH	1	2
ECK120016783	ygbA	1	1
ECK120028592	ygbE	1	1
ECK120023782	ygbI	1	1
ECK120028591	ygbLM	1	2
ECK120027984	ygbN	1	1
ECK120016639	ygcG	1	1
ECK120028595	ygcNOP	1	3
ECK120028596	ygcRQ	1	2
ECK120027986	ygcS	1	1
ECK120028597	ygcU	1	1
ECK120028598	ygcW	1	1
ECK120030611	ygdD	1	1
ECK120034593	ygdG	1	1
ECK120028603	ygdH	1	1
ECK120023783	ygdI	1	1
ECK120028391	ygdQ	1	1
ECK120028392	ygdR	1	1
ECK120028402	ygeF	1	1
ECK120028403	ygeG	1	1
ECK120028404	ygeH	1	1
ECK120028405	ygeI	1	1
ECK120028407	ygeLK	1	2
ECK120028409	ygeP	1	1
ECK120028410	ygeQ	1	1
ECK120028411	ygeR	1	1
ECK120023784	ygeV	1	1
ECK120028412	ygeW	1	1
ECK120028413	ygeX	1	1
ECK120028414	ygeY	1	1
ECK125162052	ygfB-pepP-ubiHI	1	4
ECK120028429	ygfF	1	1
ECK120028435	ygfI	1	1
ECK120029387	ygfM-xdhD	1	2
ECK120028422	ygfTS	1	2
ECK120023785	ygfZ	1	1
ECK120030501	yggI	1	1
ECK120028443	yggM	1	1
ECK120023786	yggR	1	1
ECK120028168	yghA	1	1
ECK120028456	yghB	1	1
ECK120028446	yghED	1	2
ECK120026440	yghF	1	1
ECK120028447	yghG	1	1
ECK120028449	yghJ	1	1
ECK120028169	yghO	1	1
ECK120028450	yghQ	1	1
ECK120028451	yghSR	1	2
ECK120023787	yghT	1	1
ECK120023788	yghU	1	1
ECK120028454	yghW	1	1
ECK125108696	yghX_2X_1	1	2
ECK120023789	yghZ	1	1
ECK120023790	ygiD	1	1
ECK120028476	ygiF-glnE	1	2
ECK120023659	ygiH	1	1
ECK120028472	ygiL	1	1
ECK120028468	ygiN	1	1
ECK120028461	ygiQ	1	1
ECK120028464	ygiS	1	1
ECK120028465	ygiV	1	1
ECK120028466	ygiW	1	1
ECK120023632	ygiZ	1	1
ECK120023873	ygjH	1	1
ECK120027971	ygjI	1	1
ECK120028479	ygjJK	1	2
ECK120027972	ygjP	1	1
ECK120028483	ygjQ	1	1
ECK120028484	ygjR	1	1
ECK120028486	ygjV	1	1
ECK120028493	yhaBC	1	2
ECK120028489	yhaH	1	1
ECK120028490	yhaI	1	1
ECK120023874	yhaJ	1	1
ECK120028491	yhaKL	1	2
ECK120027975	yhaOM	1	2
ECK120028289	yhbE-obgE	1	2
ECK120023875	yhbO	1	1
ECK120023876	yhbP	1	1
ECK120023877	yhbQ	1	1
ECK120028389	yhbUV	1	2
ECK120028284	yhbW	1	1
ECK120028287	yhbX	1	1
ECK120023878	yhbY	1	1
ECK120028296	yhcAD-ychE_1	1	3
ECK120028301	yhcB	1	1
ECK120028295	yhcC	1	1
ECK120028298	yhcG	1	1
ECK120028303	yhcN	1	1
ECK120028304	yhcO	1	1
ECK120023879	yhdH	1	1
ECK120028308	yhdJ	1	1
ECK120028314	yhdN-zntR	1	2
ECK120028307	yhdP	1	1
ECK120020909	yhdT-panF-prmA	1	3
ECK120028309	yhdU	1	1
ECK120028310	yhdV	1	1
ECK120015051	yhdWXYZ	1	4
ECK120028320	yheSTU	1	3
ECK120014519	yhfA	1	1
ECK120030612	yhfK	1	1
ECK120028323	yhfL	1	1
ECK120028324	yhfXW-php-yhfUTS	1	6
ECK120028325	yhfZY	1	2
ECK120028332	yhgA	1	1
ECK120023880	yhgE	1	1
ECK120029385	yhgF	1	1
ECK120023881	yhgN	1	1
ECK120023882	yhhA	1	1
ECK120028345	yhhH	1	1
ECK120028347	yhhI	1	1
ECK120023884	yhhM	1	1
ECK120028339	yhhN	1	1
ECK120028340	yhhQ	1	1
ECK120023885	yhhS	1	1
ECK120028342	yhhT	1	1
ECK120028335	yhhW	1	1
ECK120014463	yhhX	1	1
ECK120015857	yhhY	1	1
ECK120028336	yhhZ-yrhA-insA-6AB-6B-6	1	5
ECK120028065	yhiI-rbbA-yhhJ	1	3
ECK120028348	yhiJ	1	1
ECK120028349	yhiK	1	1
ECK120028350	yhiL	1	1
ECK120023826	yhiM	1	1
ECK120023791	yhiN	1	1
ECK125108714	yhiS_1	1	1
ECK120028356	yhjA	1	1
ECK120023792	yhjB	1	1
ECK120028357	yhjC	1	1
ECK120028068	yhjD	1	1
ECK120028358	yhjE	1	1
ECK120028359	yhjG	1	1
ECK120016765	yhjJ	1	1
ECK120030619	yhjR	1	1
ECK120028362	yhjV	1	1
ECK120028364	yhjX	1	1
ECK120028365	yhjY	1	1
ECK120028369	yiaA	1	1
ECK120027961	yiaB	1	1
ECK120028366	yiaD	1	1
ECK120023793	yiaF	1	1
ECK120015883	yiaG	1	1
ECK120014587	yiaJ	1	1
ECK120023795	yiaT	1	1
ECK120023796	yiaU	1	1
ECK120028372	yiaWV	1	2
ECK120028373	yiaY	1	1
ECK120027962	yibF	1	1
ECK120028376	yibG	1	1
ECK120027963	yibIH	1	2
ECK120028375	yibJ	1	1
ECK120028377	yibL	1	1
ECK120023797	yibT	1	1
ECK120028383	yicC	1	1
ECK120028385	yicG	1	1
ECK120028387	yicH	1	1
ECK120016773	yicJI	1	2
ECK120028180	yicL	1	1
ECK120028182	yicN	1	1
ECK120023798	yicS	1	1
ECK120028189	yidA	1	1
ECK120028190	yidB	1	1
ECK120028187	yidE	1	1
ECK120028184	yidHGF	1	3
ECK120023799	yidI	1	1
ECK120028185	yidKJ	1	2
ECK120023800	yidL	1	1
ECK120023801	yidP	1	1
ECK120026437	yidQ	1	1
ECK120023802	yidR	1	1
ECK120023804	yidX	1	1
ECK120028193	yidZ	1	1
ECK120028194	yieEF	1	2
ECK120028195	yieH	1	1
ECK120028203	yieP-hsrA	1	2
ECK120023806	yifB	1	1
ECK120023807	yifE	1	1
ECK120028209	yifK	1	1
ECK120028211	yifL-dapF-yigA-xerC-yigB	1	5
ECK120028205	yifNO	1	2
ECK120023808	yigE	1	1
ECK120028212	yigGF	1	2
ECK120028214	yigI	1	1
ECK120028219	yigM	1	1
ECK120023809	yihA	1	1
ECK120028225	yihD	1	1
ECK120028226	yihF	1	1
ECK120026443	yihG	1	1
ECK120028227	yihI	1	1
ECK120028229	yihLM	1	2
ECK120028230	yihN	1	1
ECK120028232	yihPO	1	2
ECK120028233	yihQ	1	1
ECK120028234	yihR	1	1
ECK120028235	yihUTS	1	3
ECK120028236	yihVW	1	2
ECK120028237	yihXY-dtd-yiiD	1	4
ECK120028238	yiiE	1	1
ECK120028239	yiiF	1	1
ECK120028241	yiiG	1	1
ECK120028244	yiiM	1	1
ECK120028247	yiiQ	1	1
ECK120028248	yiiR	1	1
ECK120028083	yiiS-uspD	1	2
ECK120028249	yiiX	1	1
ECK120028250	yijE	1	1
ECK120028055	yijF	1	1
ECK120028252	yijO	1	1
ECK120028058	yjaA	1	1
ECK120015112	yjaB	1	1
ECK120028258	yjaG	1	1
ECK120030554	yjaH	1	1
ECK120026418	yjaZ	1	1
ECK120028260	yjbB	1	1
ECK120028261	yjbD	1	1
ECK120028265	yjbI	1	1
ECK120028266	yjbJ	1	1
ECK120028267	yjbLM	1	2
ECK120028270	yjbQR	1	2
ECK120023811	yjcB	1	1
ECK120028272	yjcE	1	1
ECK120028273	yjcF	1	1
ECK120028274	yjcO	1	1
ECK120028276	yjcS	1	1
ECK120028281	yjdF	1	1
ECK120028282	yjdIJ	1	2
ECK120028279	yjdM	1	1
ECK120028278	yjdN	1	1
ECK120028062	yjdP	1	1
ECK120023813	yjeH	1	1
ECK120028086	yjeI	1	1
ECK120028087	yjeJ	1	1
ECK120028091	yjeM	1	1
ECK120028092	yjeNO	1	2
ECK120028095	yjeT	1	1
ECK125095401	yjeV	1	1
ECK120028097	yjfKLMC	1	4
ECK120028098	yjfN	1	1
ECK120023815	yjfP	1	1
ECK120023816	yjfY	1	1
ECK120023817	yjfZ	1	1
ECK120023818	yjgA	1	1
ECK120028112	yjgH	1	1
ECK120028116	yjgL	1	1
ECK120023821	yjgM	1	1
ECK120023822	yjgN	1	1
ECK120028119	yjgR	1	1
ECK120028122	yjgW	1	1
ECK120028124	yjgX_1X_2	1	2
ECK120028123	yjgX_3	1	1
ECK120023823	yjgZ	1	1
ECK120023824	yjhD	1	1
ECK120028126	yjhE	1	1
ECK120028134	yjhF	1	1
ECK120028135	yjhIHG	1	3
ECK120028137	yjhP	1	1
ECK120023825	yjhR	1	1
ECK120028133	yjhU	1	1
ECK120028138	yjhXQ	1	2
ECK120023827	yjiC	1	1
ECK120028141	yjiHG-iadA	1	3
ECK120028142	yjiJ	1	1
ECK120028143	yjiK	1	1
ECK120028144	yjiML	1	2
ECK120028146	yjiPQ	1	2
ECK120023829	yjiR	1	1
ECK120028147	yjiS	1	1
ECK120028148	yjiT	1	1
ECK120028149	yjiV	1	1
ECK120028150	yjiXA	1	2
ECK120028151	yjiY	1	1
ECK120028162	yjjI	1	1
ECK120028049	yjjJ	1	1
ECK120028155	yjjP	1	1
ECK120028156	yjjQ-bglJ	1	2
ECK120028160	yjjUV	1	2
ECK120028161	yjjW	1	1
ECK120023832	yjjX	1	1
ECK120029260	yjjY	1	1
ECK120023833	yjjZ	1	1
ECK120029261	yjtD	1	1
ECK120029191	ykfC	1	1
ECK120029183	ykfJ-prfH	1	2
ECK120029211	ykgA	1	1
ECK120029214	ykgEFG	1	3
ECK120029215	ykgH	1	1
ECK120029205	ykgJ	1	1
ECK120023834	ykgL	1	1
ECK120029209	ykgMO	1	2
ECK125108711	ykgR	1	1
ECK120027950	ykiA	1	1
ECK120029229	ykiB	1	1
ECK120029251	ylaC	1	1
ECK120029054	ylbG	1	1
ECK120029140	yliI	1	1
ECK120030555	ymbA	1	1
ECK120028966	ymcE-gnsA	1	2
ECK120028977	ymdA	1	1
ECK120028973	ymdE-ycdU	1	2
ECK120028178	ymdF	1	1
ECK120028997	ymfA-ycfZ	1	2
ECK120029001	ymfED	1	2
ECK120030515	ymfH-xisE-intE	1	3
ECK120023838	ymfI	1	1
ECK120029003	ymfJ	1	1
ECK120029004	ymfK	1	1
ECK120029005	ymfTLMNROPQ-ycfK-ymfS	1	10
ECK120028028	ymgE	1	1
ECK120029015	ymgF	1	1
ECK120028026	ymgGD	1	2
ECK120029018	ymgH-ycgI	1	2
ECK120030507	ymiA-yciX	1	2
ECK120029043	ymjA	1	1
ECK120028848	ynaA-lomR_1	1	2
ECK120028851	ynaE	1	1
ECK120023839	ynaI	1	1
ECK120028833	ynaJ	1	1
ECK120028847	ynaK-ydaY	1	2
ECK120028862	ynbABCD	1	4
[truncated: 642 more rows]

## Sheet: TU_GENE V9.1
Genes distribution in E. coli K12MG155 trancription unit
Data source Regulon DB v9.0
Description of columns:
1.- Number of genes in the TU
2.- ID TU designed by RegulonDB v9.0
3.-UT name
4.- Operon name
5.-Promoter name
6.- Type of sigma factor
#Genes TU	ID TU	TU Name	Operon name	Genes name	Promoter name	Sigma
1	ECK120021182	aaeR	aaeR	aaeR	aaeRp
3	ECK120027580	aaeXAB	aaeXAB	aaeX,aaeA,aaeB	aaeXp
1	ECK120009420	accA	accA	accA	accAp
1	ECK125203406	accA	accA	accA	accAp2
2	ECK120009421	accBC	accBC	accB,accC	accBp
2	ECK125203407	accBC	accBC	accB,accC	accBp2
1	ECK120009422	accD	accD	accD	accDp
3	ECK120009194	aceBAK	aceBAK	aceB,aceA,aceK	aceBp
2	ECK120009148	aceEF	pdhR-aceEF-lpd	aceE,aceF	aceEp
1	ECK120033577	aceK	aceBAK	aceK	aceKp
1	ECK120009572	ackA	ackA-pta	ackA	ackAp
1	ECK120009827	acnA	acnA	acnA	acnAp1
1	ECK120009826	acnA	acnA	acnA	acnAp2
1	ECK120034134	acnA	acnA	acnA	acnAp3
1	ECK120009828	acnB	acnB	acnB	acnBp
1	ECK120034117	acnB	acnB	acnB	acnBp2
1	ECK125162166	acpP	yceD-rpmF-plsX-fabHDG-acpP-fabF	acpP	acpPp
2	ECK120009765	acpP-fabF	yceD-rpmF-plsX-fabHDG-acpP-fabF	acpP,fabF	acpPp
2	ECK120009423	acrAB	acrAB	acrA,acrB	acrAp
1	ECK120034124	acrB	acrAB	acrB	acrBp
1	ECK120015501	acrD	acrD	acrD	acrDp
1	ECK125095460	acrD	acrD	acrD	acrDp2
2	ECK120009424	acrEF	acrEF	acrE,acrF	acrEp
1	ECK120015960	acrR	acrR	acrR	acrRp
1	ECK120026749	acrZ	acrZ	acrZ	acrZp
3	ECK120009003	acs-yjcH-actP	acs-yjcH-actP	acs,yjcH,actP	acsp1
3	ECK120009004	acs-yjcH-actP	acs-yjcH-actP	acs,yjcH,actP	acsp2
1	ECK125095458	actP	acs-yjcH-actP	actP	actPp
2	ECK120009265	ada-alkB	ada-alkB	ada,alkB	adap
1	ECK120027046	add	add	add	addp6
1	ECK120021188	adeD	adeD	adeD	adep
1	ECK120009389	adhE	adhE	adhE	adhEp1
1	ECK120009789	adhE	adhE	adhE	adhEp2
1	ECK120009425	adiA	adiA	adiA	adiAp
1	ECK120027806	adiC	adiC	adiC	adiCp7
1	ECK120011167	adiY	adiY	adiY	adiYp
1	ECK120011056	adk	adk	adk	adkp
1	ECK120026302	dgcC	dgcC	dgcC	adrAp
1	ECK120010891	aer	aer	aer	aerp
1	ECK120009083	aes	aes	aes	aesp
1	ECK120009142	agaR	agaR	agaR	agaRp
6	ECK120009143	agaS-kbaY-agaBCDI	agaS-kbaY-agaBCDI	agaS,kbaY,agaB,agaC,agaD,agaI	agaSp
1	ECK120015319	agp	agp	agp	agpp
1	ECK125160641	agrA	agrA	agrA	agrAp
1	ECK125160642	agrB	agrB	agrB	agrBp
2	ECK120009267	ahpCF	ahpCF	ahpC,ahpF	ahpCp
2	ECK120051388	ahpCF	ahpCF	ahpC,ahpF	ahpCp2
1	ECK120016699	ahpF	ahpCF	ahpF	ahpFp
1	ECK120009288	aidB	aidB	aidB	aidBp
1	ECK120027268	alaA	alaA-yfbR	alaA	alaAp9
1	ECK120027301	alaC	alaC	alaC	alaCp
1	ECK120011073	alaS	alaS	alaS	alaSp
2	ECK120009696	alaWX	alaWX	alaW,alaX	alaWp
1	ECK120009709	aldA	aldA	aldA	aldAp
1	ECK120009330	aldB	aldB	aldB	aldBp
1	ECK120009195	alkA	alkA	alkA	alkAp
1	ECK120009266	alkB	ada-alkB	alkB	alkBp
1	ECK120015329	allA	allA	allA	allAp
3	ECK120015332	allDCE	allDCE	allD,allC,allE	allDp
1	ECK120026303	allR	allR	allR	allRp
1	ECK120015330	allS	allS	allS	allSp
1	ECK120029337	alr	alr	alr	alrp1
1	ECK120034179	alr	alr	alr	alrp2
4	ECK120033596	alsBACE	rpiR-alsBACE	alsB,alsA,alsC,alsE	alsBp
5	ECK120009031	rpiR-alsBACE	rpiR-alsBACE	rpiR,alsB,alsA,alsC,alsE	alsRp1
5	ECK120009030	rpiR-alsBACE	rpiR-alsBACE	rpiR,alsB,alsA,alsC,alsE	alsRp2
2	ECK120008986	amiA-hemF	amiA-hemF	amiA,hemF	amiAp
1	ECK120011068	amn	amn	amn	amnp1
1	ECK120009726	ampC	ampC	ampC	ampCp
2	ECK120009427	ampDE	ampDE	ampD,ampE	ampD
1	ECK120021191	ampH	ampH	ampH	ampHp1
1	ECK120034121	ampH	ampH	ampH	ampHp2
1	ECK120015322	amyA	amyA	amyA	amyAp
1	ECK120011076	ansB	ansB	ansB	ansBp1
1	ECK120009268	ansB	ansB	ansB	ansBp2
1	ECK120015353	ansP	ansP	ansP	ansPp1
1	ECK120015354	ansP	ansP	ansP	ansPp2
2	ECK120009077	apaGH	lptD-surA-pdxA-rsmA-apaGH	apaG,apaH	apaGp
1	ECK120009644	appA	appCBXA	appA	appAp
4	ECK120009290	appCBXA	appCBXA	appC,appB,appX,appA	appCp
1	ECK120020533	appY	appY	appY	appYp
1	ECK125136339	appY	appY	appY	appYp2
1	ECK120029303	apt	apt	apt	aptp
3	ECK120009405	araBAD	araBAD	araB,araA,araD	araBp
1	ECK120009196	araC	araC	araC	araCp
1	ECK120009269	araE	araE-ygeA	araE	araEp
2	ECK125165388	araE-ygeA	araE-ygeA	araE,ygeA	araEp
3	ECK120009291	araFGH	araFGH	araF,araG,araH	araFp
3	ECK125136337	araFGH	araFGH	araF,araG,araH	araFp2
1	ECK120009292	araJ	araJ	araJ	araJp
1	ECK120009741	arcA	arcA	arcA	arcAp1
1	ECK120009742	arcA	arcA	arcA	arcAp2
1	ECK120009743	arcA	arcA	arcA	arcAp3
1	ECK120009744	arcA	arcA	arcA	arcAp4
1	ECK120009747	arcA	arcA	arcA	arcAp5
1	ECK120009745	arcA	arcA	arcA	arcAp6
1	ECK120009746	arcA	arcA	arcA	arcAp7
1	ECK120009097	arcB	arcB	arcB	arcBp
1	ECK120020463	arcZ	arcZ	arcZ	arcZp
1	ECK120027588	arfA	arfA	arfA	arfAp3
1	ECK120020424	argA	argA	argA	argAp
3	ECK120009197	argCBH	argCBH	argC,argB,argH	argCp
1	ECK120009303	argD	argD	argD	argDp
1	ECK120009416	argE	argE	argE	argEp1
1	ECK120011090	argE	argE	argE	argEp2
1	ECK120009198	argF	argF	argF	argFp
1	ECK120009085	argG	argG	argG	argGp
1	ECK120009199	argI	argI	argI	argIp
1	ECK120027482	argO	argO	argO	argOp
1	ECK120010883	argP	argP	argP	argPp
1	ECK120033750	argQ	serV-argVYZQ	argQ	argQp
1	ECK120009200	argR	argR	argR	argRp1
1	ECK120008994	argR	argR	argR	argRp2
1	ECK120029317	argS	argS	argS	argSp
5	ECK120008996	argT-hisJQMP	argT-hisJQMP	argT,hisJ,hisQ,hisM,hisP	argTp
1	ECK120009673	argU	argU	argU	argUp
1	ECK120009682	argW	argW	argW	argWp
4	ECK120009685	argX-hisR-leuT-proM	argX-hisR-leuT-proM	argX,hisR,leuT,proM	argXp
2	ECK120009201	aroF-tyrA	aroF-tyrA	aroF,tyrA	aroFp
1	ECK120009202	aroG	aroG	aroG	aroGp
1	ECK120009203	aroH	aroH	aroH	aroHp1
1	ECK120029298	aroH	aroH	aroH	aroHp2
7	ECK120009836	aroKB-damX-dam-rpe-gph-trpS	aroKB-damX-dam-rpe-gph-trpS	aroK,aroB,damX,dam,rpe,gph,trpS	aroKp1
7	ECK120009837	aroKB-damX-dam-rpe-gph-trpS	aroKB-damX-dam-rpe-gph-trpS	aroK,aroB,damX,dam,rpe,gph,trpS	aroKp2
3	ECK120009204	aroL-yaiA-aroM	aroL-yaiA-aroM	aroL,yaiA,aroM	aroLp
3	ECK125165386	aroL-yaiA-aroM	aroL-yaiA-aroM	aroL,yaiA,aroM	aroLp2
1	ECK120009205	aroP	aroP	aroP	aroPp1
1	ECK120009805	aroP	aroP	aroP	aroPp2
1	ECK125135010	arrS	arrS	arrS	arrSp
3	ECK120009429	arsRBC	arsRBC	arsR,arsB,arsC	arsRp
1	ECK120015356	artJ	artJ	artJ	artJp
4	ECK120009430	artPIQM	artPIQM	artP,artI,artQ,artM	artPp
4	ECK120034536	artPIQM	artPIQM	artP,artI,artQ,artM	artPp1
4	ECK120034537	artPIQM	artPIQM	artP,artI,artQ,artM	artPp2
4	ECK120034538	artPIQM	artPIQM	artP,artI,artQ,artM	artPp3
1	ECK125203404	ascB	ascFB	ascB	ascBp
2	ECK120009431	ascFB	ascFB	ascF,ascB	ascFp
1	ECK120026317	aslB	aslB	aslB	aslBp
1	ECK120009304	asnA	asnA	asnA	asnAp
1	ECK120011057	asnB	asnB	asnB	asnBp
1	ECK120009305	asnC	asnC-mioC-mnmG-rsmG	asnC	asnCp
2	ECK120029471	asnC-mioC	asnC-mioC-mnmG-rsmG	asnC,mioC	asnCp
3	ECK120029472	asnC-mioC-mnmG	asnC-mioC-mnmG-rsmG	asnC,mioC,mnmG	asnCp
1	ECK120026799	asnS	asnS	asnS	asnSp
1	ECK120009679	asnT	asnT	asnT	asnTp
1	ECK120009680	asnU	asnU	asnU	asnUp
1	ECK120009681	asnV	asnV	asnV	asnVp
1	ECK120009351	aspA	aspA-dcuA	aspA	aspAp
2	ECK120009111	aspA-dcuA	aspA-dcuA	aspA,dcuA	aspAp
1	ECK120011059	aspC	aspC	aspC	aspCp
1	ECK120015350	aspS	aspS	aspS	aspSp
1	ECK120034143	aspS	aspS	aspS	aspSp1
1	ECK120030195	aspU	aspU	aspU	aspUp
1	ECK120009671	aspV	aspV	aspV	aspVp
1	ECK120008954	asr	asr	asr	asrp
5	ECK120008913	astCADBE	astCADBE	astC,astA,astD,astB,astE	astCp1
5	ECK120008914	astCADBE	astCADBE	astC,astA,astD,astB,astE	astCp2
5	ECK120008915	astCADBE	astCADBE	astC,astA,astD,astB,astE	astCp3
4	ECK120009306	atoDAEB	atoDAEB	atoD,atoA,atoE,atoB	atoDp
8	ECK120009149	atpBEFHAGDC	atpIBEFHAGDC	atpB,atpE,atpF,atpH,atpA,atpG,atpD,atpC	atpBp1
8	ECK120009150	atpBEFHAGDC	atpIBEFHAGDC	atpB,atpE,atpF,atpH,atpA,atpG,atpD,atpC	atpBp2
9	ECK120009433	atpIBEFHAGDC	atpIBEFHAGDC	atpI,atpB,atpE,atpF,atpH,atpA,atpG,atpD,atpC	atpIp
1	ECK120027661	avtA	avtA	avtA	avtAp
1	ECK125140825	azoR	azoR	azoR	azoRp
1	ECK125095420	azuC	azuC	azuC	azuCp
1	ECK120008993	bacA	bacA	bacA	bacAp
1	ECK120010948	bamA	bamA-skp-lpxD-fabZ-lpxAB-rnhB-dnaE	bamA	bamAp
8	ECK120016562	bamA-skp-lpxD-fabZ-lpxAB-rnhB-dnaE	bamA-skp-lpxD-fabZ-lpxAB-rnhB-dnaE	bamA,skp,lpxD,fabZ,lpxA,lpxB,rnhB,dnaE	bamAp2
2	ECK120016551	bamB-der	bamB-der	bamB,der	bamBp
1	ECK120009014	bamC	dapA-bamC	bamC	bamCp
1	ECK120010950	bamD	bamD	bamD	bamDp
1	ECK120016555	bamD	bamD	bamD	bamDp2
1	ECK120010926	bamE	bamE	bamE	bamEp
1	ECK120011138	bcp	bcp	bcp	bcpp
2	ECK120016329	bcsBZ	bcsABZC	bcsB,bcsZ	bcsBp
3	ECK120027649	bcsEFG	bcsEFG	bcsE,bcsF,bcsG	bcsEp2
1	ECK120027842	bdcA	bdcA	bdcA	bdcAp
2	ECK120015172	bdm-sra	bdm-sra	bdm,sra	bdmp
2	ECK120016550	bepA-yfgD	bepA-yfgD	bepA,yfgD	bepAp1
2	ECK120034154	bepA-yfgD	bepA-yfgD	bepA,yfgD	bepAp2
3	ECK120009307	betIBA	betIBA	betI,betB,betA	betIp
1	ECK120009308	betT	betT	betT	betTp
1	ECK125158021	bglG	bglGFB	bglG	bglGp
3	ECK120009051	bglGFB	bglGFB	bglG,bglF,bglB	bglGp
1	ECK125165382	bglG	bglGFB	bglG	bglGp2
1	ECK120015323	bglX	bglX	bglX	bglXp
1	ECK120021110	bhsA	bhsA	bhsA	bhsAp
1	ECK125135560	bhsA	bhsA	bhsA	bhsAp9
1	ECK120009206	bioA	bioA	bioA	bioAp
4	ECK120009309	bioBFCD	bioBFCD	bioB,bioF,bioC,bioD	bioBp
1	ECK120021194	bioH	bioH	bioH	bioHp
1	ECK120009126	blc	blc	blc	blcp
1	ECK120027047	blr	blr	blr	blrp
1	ECK125158011	bluF	bluF	bluF	bluFp
1	ECK120026863	bluR	bluR	bluR	bluRp
1	ECK120009573	bolA	bolA	bolA	bolAp1
1	ECK120027938	bolA	bolA	bolA	bolAp2
1	ECK120015485	borD	borD	borD	borDp
2	ECK120026631	brnQ-proY	brnQ-proY	brnQ,proY	brnQp
1	ECK120027828	bsmA	bsmA	bsmA	bsmAp
1	ECK120034130	bssS	bssS	bssS	bssSp
1	ECK120016403	bssS	bssS	bssS	bssSp1
1	ECK120016404	bssS	bssS	bssS	bssSp2
2	ECK120011091	btuB-murI	btuB-murI	btuB,murI	btuBp
1	ECK120033751	cadA	cadBA	cadA	cadAp
2	ECK120009649	cadBA	cadBA	cadB,cadA	cadBp
1	ECK120009310	cadC	cadC	cadC	cadCp
3	ECK120033587	caiCDE	caiTABCDE	caiC,caiD,caiE	caiCp
1	ECK120009715	caiF	caiF	caiF	caiFp
6	ECK120009437	caiTABCDE	caiTABCDE	caiT,caiA,caiB,caiC,caiD,caiE	caiTp
1	ECK120021196	can	can	can	canp
2	ECK120009302	carAB	carAB	carA,carB	carAp1
2	ECK120009301	carAB	carAB	carA,carB	carAp2
1	ECK120011049	carB	carAB	carB	carBp
4	ECK120033600	casDE12	casABCDE12	casD,casE,cas1,cas2	casDp
7	ECK120027409	casABCDE12	casABCDE12	casA,casB,casC,casD,casE,cas1,cas2	casp
1	ECK120008948	cbl	cbl	cbl	cblp
2	ECK120009574	cbpAM	cbpAM	cbpA,cbpM	cbpAp1
2	ECK125135012	cbpAM	cbpAM	cbpA,cbpM	cbpAp2
2	ECK125160644	cbpAM	cbpAM	cbpA,cbpM	cbpAp4
2	ECK125160643	cbpAM	cbpAM	cbpA,cbpM	cbpAp6
8	ECK120010972	ccmABCDEFGH	napFDAGHBC-ccmABCDEFGH	ccmA,ccmB,ccmC,ccmD,ccmE,ccmF,ccmG,ccmH	ccmAp
1	ECK120009029	cdaR	cdaR	cdaR	cdaRp
1	ECK120011119	cdd	cdd	cdd	cddp
1	ECK120009127	cdh	cdh	cdh	cdhp
1	ECK120009820	cedA	cedA	cedA	cedAp
1	ECK120009780	cfa	cfa	cfa	cfap1
1	ECK120009781	cfa	cfa	cfa	cfap2
1	ECK120033242	chaC	chaBC	chaC	chaCp
6	ECK120009438	chbBCARFG	chbBCARFG	chbB,chbC,chbA,chbR,chbF,chbG	chbBp
1	ECK120008988	chiA	chiA	chiA	chiAp
2	ECK120026729	chiP-ybfN	chiP-ybfN	chiP,ybfN	chiPp
1	ECK120020467	chiX	chiX	chiX	chiXp
1	ECK120015369	cho	cho	cho	chop
2	ECK120009440	chpSB	chpSB	chpS,chpB	chpSp1
2	ECK120008944	chpSB	chpSB	chpS,chpB	chpSp2
1	ECK120009208	cirA	cirA	cirA	cirAp1
1	ECK120009207	cirA	cirA	cirA	cirAp2
6	ECK120026707	citCDEFXG	citCDEFXG	citC,citD,citE,citF,citX,citG	citCp1
6	ECK120049214	citCDEFXG	citCDEFXG	citC,citD,citE,citF,citX,citG	citCp2
1	ECK120009629	clpA	clpA	clpA	clpAp1
1	ECK120009630	clpA	clpA	clpA	clpAp2
1	ECK120009631	clpA	clpA	clpA	clpAp3
1	ECK120009606	clpB	clpB	clpB	clpBp
2	ECK120009441	clpPX	clpPX-lon	clpP,clpX	clpPp1
2	ECK120009604	clpPX	clpPX-lon	clpP,clpX	clpPp2
2	ECK120033570	clpPX	clpPX-lon	clpP,clpX	clpPp3
2	ECK120033241	clpX-lon	clpPX-lon	clpX,lon	clpXp
2	ECK120011121	clsA-yciU	clsA-yciU	clsA,yciU	clsAp
1	ECK120034128	clsC	ymdB-clsC	clsC	clsCp
2	ECK120009752	cmk-rpsA	cmk-rpsA-ihfB	cmk,rpsA	cmkp
1	ECK120009763	mdfA	mdfA	mdfA	cmrp
1	ECK120035090	mdfA	mdfA	mdfA	cmrp2
1	ECK120027898	coaA	coaA	coaA	coaAp
3	ECK120009442	cobUST	cobUST	cobU,cobS,cobT	cobUp1
3	ECK120016338	cobUST	cobUST	cobU,cobS,cobT	cobUp2
2	ECK120009388	codBA	codBA	codB,codA	codBp
1	ECK120021109	comR	comR	comR	comRp
1	ECK120011123	copA	copA	copA	copAp
1	ECK120009639	corA	corA	corA	corAp
1	ECK120009312	cpdB	cpdB	cpdB	cpdBp
2	ECK120027471	sdhE-cptA	sdhE-cptA	sdhE,cptA	cptBp
1	ECK120008917	cpxP	cpxP	cpxP	cpxPp
2	ECK120015944	cpxRA	cpxRA	cpxR,cpxA	cpxRp
4	ECK120009443	creABCD	creABCD	creA,creB,creC,creD	creAp
3	ECK120033564	creABC	creABCD	creA,creB,creC	creAp2
1	ECK120034932	creD	creABCD	creD	creDp
1	ECK120026573	crl	crl	crl	crlp1
1	ECK125095424	crl	crl	crl	crlp2
1	ECK120009311	crp	crp	crp	crpp1
1	ECK120030677	crp	crp	crp	crpp2
1	ECK120030676	crp	crp	crp	crpp3
1	ECK120009050	crr	ptsHI-crr	crr	crrp2
1	ECK120009048	crr	ptsHI-crr	crr	crrpI
3	ECK120009577	csgBAC	csgBAC	csgB,csgA,csgC	csgBp
1	ECK120033752	csgC	csgBAC	csgC	csgCp
4	ECK120011098	csgDEFG	csgDEFG	csgD,csgE,csgF,csgG	csgDp1
4	ECK120033026	csgDEFG	csgDEFG	csgD,csgE,csgF,csgG	csgDp2
5	ECK120009012	csiD-lhgO-gabDTP	csiD-lhgO-gabDTP	csiD,lhgO,gabD,gabT,gabP	csiDp
1	ECK120009011	csiE	csiE	csiE	csiEp
1	ECK120011080	cspA	cspA	cspA	cspAp1
1	ECK120011081	cspA	cspA	cspA	cspAp2
1	ECK120009128	cspD	cspD	cspD	cspDp
1	ECK120034114	cspE	cspE	cspE	cspEp1
1	ECK120026709	cspE	cspE	cspE	cspEp2
1	ECK120010984	cspI	cspI	cspI	cspIp
1	ECK125145777	cspI	cspI	cspI	cspIp2
1	ECK125136341	csrA	csrA	csrA	csrAp1
1	ECK125138146	csrA	csrA	csrA	csrAp2
1	ECK120027400	csrA	csrA	csrA	csrAp3
1	ECK125136342	csrA	csrA	csrA	csrAp4
1	ECK125136343	csrA	csrA	csrA	csrAp5
1	ECK120009047	csrB	csrB	csrB	csrBp
1	ECK120009052	csrC	csrC	csrC	csrCp
1	ECK120009172	cstA	cstA	cstA	cstAp1
1	ECK120009171	cstA	cstA	cstA	cstAp2
1	ECK120009170	cstA	cstA	cstA	cstAp3
1	ECK120010915	cueO	cueO	cueO	cueOp
4	ECK120008958	cusCFBA	cusCFBA	cusC,cusF,cusB,cusA	cusCp
2	ECK120008959	cusRS	cusRS	cusR,cusS	cusRp
1	ECK120009751	cutA	cutA	cutA	cutAp
3	ECK120009657	cvpA-purF-ubiX	cvpA-purF-ubiX	cvpA,purF,ubiX	cvpAp1
3	ECK120009628	cvpA-purF-ubiX	cvpA-purF-ubiX	cvpA,purF,ubiX	cvpAp2
1	ECK120009209	cyaA	cyaA	cyaA	cyaAp
1	ECK120030678	cyaA	cyaA	cyaA	cyaAp1
1	ECK120030679	cyaA	cyaA	cyaA	cyaAp2
1	ECK120027196	cyaR	cyaR	cyaR	cyaRp
1	ECK120027831	cycA	cycA	cycA	cycAp
2	ECK120009293	cydAB	cydAB	cydA,cydB	cydAp1
2	ECK120009750	cydAB	cydAB	cydA,cydB	cydAp2
2	ECK120008989	cydAB	cydAB	cydA,cydB	cydAp3
2	ECK120008990	cydAB	cydAB	cydA,cydB	cydAp4
2	ECK120008991	cydAB	cydAB	cydA,cydB	cydAp5
2	ECK120009444	cydDC	cydDC	cydD,cydC	cydDp
1	ECK120009335	cynR	cynR	cynR	cynRp
2	ECK120030201	cynTS	cynTSX	cynT,cynS	cynTp
3	ECK120009334	cynTSX	cynTSX	cynT,cynS,cynX	cynTp
5	ECK120009294	cyoABCDE	cyoABCDE	cyoA,cyoB,cyoC,cyoD,cyoE	cyoAp
1	ECK120009270	cysB	cysB	cysB	cysBp
3	ECK120009337	cysDNC	cysDNC	cysD,cysN,cysC	cysDp
1	ECK120009129	cysE	cysE	cysE	cysEp
1	ECK120015309	cysG	nirBDC-cysG	cysG	cysGp1
1	ECK120015314	cysG	nirBDC-cysG	cysG	cysGp2
1	ECK120033749	cysH	cysJIH	cysH	cysHp
3	ECK120009271	cysJIH	cysJIH	cysJ,cysI,cysH	cysJp
1	ECK120009272	cysK	cysK	cysK	cysKp1
1	ECK120034151	cysK	cysK	cysK	cysKp2
5	ECK120009336	cysPUWAM	cysPUWAM	cysP,cysU,cysW,cysA,cysM	cysPp
1	ECK120020429	cysS	cysS	cysS	cysSp
1	ECK120011088	cytR	cytR	cytR	cytRp
1	ECK120021202	dacC	dacC	dacC	dacCp
2	ECK120009768	dadAX	dadAX	dadA,dadX	dadAp1
2	ECK120009445	dadAX	dadAX	dadA,dadX	dadAp2
2	ECK120009769	dadAX	dadAX	dadA,dadX	dadAp3
4	ECK120009839	dam-rpe-gph-trpS	aroKB-damX-dam-rpe-gph-trpS	dam,rpe,gph,trpS	damp1
4	ECK120009840	dam-rpe-gph-trpS	aroKB-damX-dam-rpe-gph-trpS	dam,rpe,gph,trpS	damp2
5	ECK120009838	damX-dam-rpe-gph-trpS	aroKB-damX-dam-rpe-gph-trpS	damX,dam,rpe,gph,trpS	damXp
2	ECK120009446	dapA-bamC	dapA-bamC	dapA,bamC	dapAp
1	ECK120011048	dapB	dapB	dapB	dapBp1
1	ECK120030636	dapB	dapB	dapB	dapBp2
1	ECK120011051	dapD	map-glnD-dapD	dapD	dapDp
2	ECK120030637	dapE-ypfN	yffB-dapE-ypfN	dapE,ypfN	dapEp
1	ECK120033744	dcd	udk-dcd	dcd	dcdp
1	ECK120008951	dctA	dctA	dctA	dctAp
1	ECK120009804	dcuA	aspA-dcuA	dcuA	dcuAp
1	ECK125165385	dcuA	aspA-dcuA	dcuA	dcuAp2
2	ECK120009650	dcuB-fumB	dcuB-fumB	dcuB,fumB	dcuBp
2	ECK120009037	dcuB-fumB	dcuB-fumB	dcuB,fumB	dcuBp2
1	ECK120010895	dcuC	dcuC	dcuC	dcuCp
1	ECK120010902	dcuD	dcuD	dcuD	dcuDp
1	ECK120021184	dcuD	dcuD	dcuD	dcuDp2
1	ECK120033038	dcuR	dcuSR	dcuR	dcuRp
2	ECK120016328	dcuSR	dcuSR	dcuS,dcuR	dcuSp
3	ECK120027145	dcyD-tcyLN	dcyD-tcyLN	dcyD,tcyL,tcyN	dcyDp
6	ECK120008999	ddpXABCDF	ddpXABCDF	ddpX,ddpA,ddpB,ddpC,ddpD,ddpF	ddpXp
6	ECK125140826	ddpXABCDF	ddpXABCDF	ddpX,ddpA,ddpB,ddpC,ddpD,ddpF	ddpXp2
6	ECK125140827	ddpXABCDF	ddpXABCDF	ddpX,ddpA,ddpB,ddpC,ddpD,ddpF	ddpXp3
2	ECK120009448	def-fmt	def-fmt	def,fmt	defp
1	ECK120011050	degP	degP	degP	degPp
1	ECK125165380	degQ	degQS	degQ	degQp
2	ECK120027577	degQS	degQS	degQ,degS	degQp1
1	ECK125165381	degS	degQS	degS	degSp
3	ECK120033593	deoABD	deoCABD	deoA,deoB,deoD	deoAp
2	ECK120009152	deoBD	deoCABD	deoB,deoD	deoBp
4	ECK120009210	deoCABD	deoCABD	deoC,deoA,deoB,deoD	deoCp1
4	ECK120009211	deoCABD	deoCABD	deoC,deoA,deoB,deoD	deoCp2
1	ECK120026773	deoR	deoR	deoR	deoRp
1	ECK120030182	dfp	dfp	dfp	dfpp
1	ECK120027006	dgcZ	dgcZ	dgcZ	dgcZp
1	ECK120027788	dgkA	dgkA	dgkA	dgkAp
1	ECK125135065	dgkA	dgkA	dgkA	dgkAp1
1	ECK120026538	dgt	dgt	dgt	dgtp1
1	ECK120030633	dgt	dgt	dgt	dgtp2
3	ECK120015345	dhaKLM	dhaKLM	dhaK,dhaL,dhaM	dhaKp
1	ECK120033754	dhaM	dhaKLM	dhaM	dhaMp
1	ECK120015344	dhaR	dhaR	dhaR	dhaRp
5	ECK120027029	dicB-ydfDE-insD-intQ	dicB-ydfDE-insD-intQ	dicB,ydfD,ydfE,insD,intQ	dicBp
3	ECK120027025	dicC-ydfXW	dicC-ydfXW	dicC,ydfX,ydfW	dicCp
4	ECK120026568	dinB-yafNOP	dinB-yafNOP	dinB,yafN,yafO,yafP	dinBp
1	ECK120027679	dinD	dinD	dinD	dinDp
1	ECK120010981	dinG	dinG	dinG	dinGp
1	ECK120026833	dinI	dinI	dinI	dinIp
2	ECK120026564	dinJ-yafQ	dinJ-yafQ	dinJ,yafQ	dinJp
1	ECK120015365	dinQ	dinQ	dinQ	dinQp
1	ECK120027506	dkgA	yqhD-dkgA	dkgA	dkgAp
1	ECK120026554	dkgB	dkgB	dkgB	dkgBp
2	ECK120033746	dksA-gluQ	sfsA-dksA-gluQ	dksA,gluQ	dksAp1
2	ECK120034541	dksA-gluQ	sfsA-dksA-gluQ	dksA,gluQ	dksAp2
2	ECK125145765	dksA-gluQ	sfsA-dksA-gluQ	dksA,gluQ	dksAp3
3	ECK120009212	dmsABC	dmsABC	dmsA,dmsB,dmsC	dmsAp1
3	ECK120008921	dmsABC	dmsABC	dmsA,dmsB,dmsC	dmsAp2
3	ECK120009449	dnaAN-recF	dnaAN-recF	dnaA,dnaN,recF	dnaAp1
3	ECK120009800	dnaAN-recF	dnaAN-recF	dnaA,dnaN,recF	dnaAp2
1	ECK120027792	dnaB	dnaB	dnaB	dnaBp
3	ECK120009450	dnaK-tpke11-dnaJ	dnaK-tpke11-dnaJ	dnaK,tpke11,dnaJ	dnaKp1
3	ECK120009602	dnaK-tpke11-dnaJ	dnaK-tpke11-dnaJ	dnaK,tpke11,dnaJ	dnaKp2
3	ECK120009603	dnaK-tpke11-dnaJ	dnaK-tpke11-dnaJ	dnaK,tpke11,dnaJ	dnaKp3
2	ECK120008938	dnaN-recF	dnaAN-recF	dnaN,recF	dnaNp1
2	ECK120008939	dnaN-recF	dnaAN-recF	dnaN,recF	dnaNp2
2	ECK120008940	dnaN-recF	dnaAN-recF	dnaN,recF	dnaNp3
2	ECK120008941	dnaN-recF	dnaAN-recF	dnaN,recF	dnaNp4
1	ECK120009153	dnaQ	dnaQ	dnaQ	dnaQp1
1	ECK120009154	dnaQ	dnaQ	dnaQ	dnaQp2
2	ECK120026300	dnaTC	yjjB-dnaTC-yjjA	dnaT,dnaC	dnaTp
3	ECK120009451	dnaTC-yjjA	yjjB-dnaTC-yjjA	dnaT,dnaC,yjjA	dnaTp
1	ECK120026658	dnaX	dnaX	dnaX	dnaXp
2	ECK120026708	dpiBA	dpiBA	dpiB,dpiA	dpiBp
2	ECK120049215	dpiBA	dpiBA	dpiB,dpiA	dpiBp2
5	ECK120009452	dppABCDF	dppABCDF	dppA,dppB,dppC,dppD,dppF	dppAp
1	ECK120009367	dps	dps	dps	dpsp
1	ECK120008919	dsbA	rdoA-dsbA	dsbA	dsbAp
1	ECK120010942	dsbC	xerD-dsbC-recJ-prfB-lysS	dsbC	dsbCp
3	ECK120016556	dsbC-recJ-prfB	xerD-dsbC-recJ-prfB-lysS	dsbC,recJ,prfB	dsbCp2
1	ECK120029305	dsbG	dsbG	dsbG	dsbGp
1	ECK120009563	dsdA	dsdXA	dsdA	dsdAp
1	ECK120009340	dsdC	dsdC	dsdC	dsdCp
2	ECK120009339	dsdXA	dsdXA	dsdX,dsdA	dsdXp
1	ECK120021206	dsrA	dsrA	dsrA	dsrAp
2	ECK120009214	dusB-fis	dusB-fis	dusB,fis	dusBp
1	ECK120027224	dusC	dusC	dusC	dusCp
2	ECK120015372	dut-slmA	dut-slmA	dut,slmA	dutp
2	ECK120009319	ebgAC	ebgAC	ebgA,ebgC	ebgAp
1	ECK120027530	ebgR	ebgR	ebgR	ebgRp
1	ECK120034931	ecnB	ecnAB	ecnB	ecnBp
1	ECK120009727	eda	edd-eda	eda	edap1
1	ECK120009728	eda	edd-eda	eda	edap2
1	ECK120009732	eda	edd-eda	eda	edap3
2	ECK120009417	edd-eda	edd-eda	edd,eda	eddp1
2	ECK120026820	efeU_1U_2	efeU_1U_2	efeU_1,efeU_2	efeU_1p
1	ECK120010882	efp	efp	efp	efpp
1	ECK120027260	elaB	elaB	elaB	elaBp
1	ECK120029334	emrD	emrD	emrD	emrDp
2	ECK120010912	emrKY	emrKY	emrK,emrY	emrKp
1	ECK120009636	endA	endA	endA	endAp1
1	ECK120009637	endA	endA	endA	endAp2
1	ECK120030642	eno	pyrG-eno	eno	enop1
1	ECK120030643	eno	pyrG-eno	eno	enop2
1	ECK120030644	eno	pyrG-eno	eno	enop3
1	ECK125109844	eno	pyrG-eno	eno	enop4
1	ECK120034162	eno	pyrG-eno	eno	enop6
1	ECK125109845	eno	pyrG-eno	eno	enop7
5	ECK120009357	entCEBAH	entCEBAH	entC,entE,entB,entA,entH	entCp
1	ECK120009112	entS	entS	entS	entSp1
1	ECK120009113	entS	entS	entS	entSp2
2	ECK120009627	epd-pgk	epd-pgk-fbaA	epd,pgk	epdp
3	ECK120015348	epd-pgk-fbaA	epd-pgk-fbaA	epd,pgk,fbaA	epdp
1	ECK120027818	epmA	epmA	epmA	epmAp
1	ECK120027652	eptB	eptB	eptB	eptBp
1	ECK120020534	erpA	erpA	erpA	erpAp
1	ECK125145760	esrE	esrE	esrE	esrEp
3	ECK120016725	essD-rrrD-rzpD	essD-rrrD-rzpD	essD,rrrD,rzpD	essDp
2	ECK120015326	evgAS	evgAS	evgA,evgS	evgAp1
2	ECK120015325	evgAS	evgAS	evgA,evgS	evgAp2
2	ECK120009455	exbBD	exbBD	exbB,exbD	exbBp
1	ECK120008977	exbD	exbBD	exbD	exbDp
1	ECK120009064	exuR	exuR	exuR	exuRp
1	ECK125095215	exuT	exuT	exuT	exuTp1
1	ECK120009341	exuT	exuT	exuT	exuTp2
1	ECK120009285	fabA	fabA	fabA	fabAp
1	ECK120011070	fabB	fabB	fabB	fabBp
3	ECK120009456	fabHDG	yceD-rpmF-plsX-fabHDG-acpP-fabF	fabH,fabD,fabG	fabHp
1	ECK125203408	fabI	fabI	fabI	fabIp
1	ECK120026908	fabI	fabI	fabI	fabIp1
2	ECK120009406	fadBA	fadBA	fadB,fadA	fadBp
2	ECK120009018	fadD-sroD	fadD-sroD	fadD,sroD	fadDp
1	ECK120021211	fadE	fadE	fadE	fadEp
1	ECK120027533	fadH	fadH	fadH	fadHp
2	ECK120009079	fadIJ	fadIJ	fadI,fadJ	fadIp
1	ECK120009273	fadL	fadL	fadL	fadLp
1	ECK120026643	fadM	fadM	fadM	fadMp1
1	ECK120049200	fadR	fadR	fadR	fadRp
1	ECK120021212	fadR	fadR	fadR	fadRp2
1	ECK120017003	fbaB	fbaB	fbaB	fbaBp
1	ECK120009343	fdhF	fdhF	fdhF	fdhFp
3	ECK120009348	fdnGHI	fdnGHI	fdnG,fdnH,fdnI	fdnGp
1	ECK120021213	feaB	feaB	feaB	feaBp1
1	ECK125162175	feaB	feaB	feaB	feaBp2
1	ECK120009779	feaR	feaR	feaR	feaRp
1	ECK125162172	feaR	feaR	feaR	feaRp1
1	ECK125162173	feaR	feaR	feaR	feaRp2
1	ECK125162174	feaR	feaR	feaR	feaRp3
5	ECK120009342	fecABCDE	fecABCDE	fecA,fecB,fecC,fecD,fecE	fecAp
2	ECK120009643	fecIR	fecIR	fecI,fecR	fecIp
3	ECK120009459	feoABC	feoABC	feoA,feoB,feoC	feoAp
2	ECK120009354	fepA-entD	fepA-entD	fepA,entD	fepAp
1	ECK120009355	fepB	fepB	fepB	fepBp
3	ECK120009356	fepDGC	fepDGC	fepD,fepG,fepC	fepDp1
3	ECK120009010	fepDGC	fepDGC	fepD,fepG,fepC	fepDp2
4	ECK120009460	fes-ybdZ-entF-fepE	fes-ybdZ-entF-fepE	fes,ybdZ,entF,fepE	fesp
1	ECK120027365	ffh	ffh	ffh	ffhp
4	ECK120009213	fhuACDB	fhuACDB	fhuA,fhuC,fhuD,fhuB	fhuAp
1	ECK120008978	fhuE	fhuE	fhuE	fhuEp
1	ECK120015476	fhuF	fhuF	fhuF	fhuFp
1	ECK125109849	fhuF	fhuF	fhuF	fhuFp2
1	ECK120010916	fic	yhfG-fic-pabA	fic	ficp
7	ECK120009721	fimAICDFGH	fimAICDFGH	fimA,fimI,fimC,fimD,fimF,fimG,fimH	fimAp
1	ECK120009595	fimB	fimB	fimB	fimBp1
1	ECK120009596	fimB	fimB	fimB	fimBp2
1	ECK120009598	fimB	fimB	fimB	fimBp3
1	ECK120009722	fimE	fimE	fimE	fimEp
1	ECK120010909	fiu	fiu	fiu	fiup
4	ECK120009716	fixABCX	fixABCX	fixA,fixB,fixC,fixX	fixAp
1	ECK120011106	fkpA	fkpA	fkpA	fkpAp1
1	ECK120011107	fkpA	fkpA	fkpA	fkpAp2
3	ECK120008946	fldA-uof-fur	fldA-uof-fur	fldA,uof,fur	fldAp
1	ECK120010918	fldB	fldB	fldB	fldBp
3	ECK120009461	flgAMN	flgAMN	flgA,flgM,flgN	flgAp
9	ECK120009462	flgBCDEFGHIJ	flgBCDEFGHIJ	flgB,flgC,flgD,flgE,flgF,flgG,flgH,flgI,flgJ	flgBp
2	ECK120010890	flgKL	flgKL	flgK,flgL	flgKp
2	ECK120010889	flgMN	flgAMN	flgM,flgN	flgMp
3	ECK120016690	flhBAE	flhBAE	flhB,flhA,flhE	flhBp
2	ECK120009328	flhDC	flhDC	flhD,flhC	flhDp
2	ECK125095427	flhDC	flhDC	flhD,flhC	flhDp2
3	ECK120009600	fliAZ-tcyJ	fliAZ-tcyJ	fliA,fliZ,tcyJ	fliAp1
3	ECK120009653	fliAZ-tcyJ	fliAZ-tcyJ	fliA,fliZ,tcyJ	fliAp2
1	ECK120010886	fliC	fliC	fliC	fliCp
3	ECK120009463	fliDST	fliDST	fliD,fliS,fliT	fliDp
3	ECK120029603	fliDST	fliDST	fliD,fliS,fliT	fliDp1
1	ECK120016218	fliE	fliE	fliE	fliEp
1	ECK120016692	fliE	fliE	fliE	fliEp1
6	ECK120009464	fliFGHIJK	fliFGHIJK	fliF,fliG,fliH,fliI,fliJ,fliK	fliFp
6	ECK120016722	fliFGHIJK	fliFGHIJK	fliF,fliG,fliH,fliI,fliJ,fliK	fliFp1
7	ECK120009465	fliLMNOPQR	fliLMNOPQR	fliL,fliM,fliN,fliO,fliP,fliQ,fliR	fliLp1
7	ECK120008950	fliLMNOPQR	fliLMNOPQR	fliL,fliM,fliN,fliO,fliP,fliQ,fliR	fliLp2
1	ECK120033580	tcyJ	fliAZ-tcyJ	tcyJ	fliYp
1	ECK120009074	flk	flk	flk	flKp
2	ECK120008982	isrC-flu	isrC-flu	isrC,flu	flup
1	ECK120034144	flu	isrC-flu	flu	flup1
1	ECK120034145	flu	isrC-flu	flu	flup2
1	ECK120008952	flxA	flxA	flxA	flxAp
1	ECK120009215	fnr	fnr	fnr	fnrp
1	ECK125108715	fnrS	fnrS	fnrS	fnrSp
2	ECK120009564	focA-pflB	focA-pflB	focA,pflB	focAp1
2	ECK120009565	focA-pflB	focA-pflB	focA,pflB	focAp2
2	ECK120009566	focA-pflB	focA-pflB	focA,pflB	focAp3
1	ECK120009121	folA	folA	folA	folAp
2	ECK120026675	folD-ybcJ	folD-ybcJ	folD,ybcJ	folDp
2	ECK120027229	folE-yeiB	folE-yeiB	folE,yeiB	folEp
2	ECK120027278	folX-yfcH	folX-yfcH	folX,yfcH	folXp
1	ECK120009379	fpr	fpr	fpr	fprp
1	ECK120015482	frc	yfdX-frc-oxc-yfdVE	frc	frcp
4	ECK120009216	frdABCD	frdABCD	frdA,frdB,frdC,frdD	frdAp
1	ECK120029335	fre	fre	fre	frep1
1	ECK120034174	fre	fre	fre	frep2
1	ECK125160639	frr	frr	frr	frrp
1	ECK120026572	frsA	frsA	frsA	frsAp
3	ECK120009352	fruBKA	fruBKA	fruB,fruK,fruA	fruBp
1	ECK120026525	cra	cra	cra	fruRp8
1	ECK120027142	ftnA	ftnA	ftnA	ftnAp
1	ECK120016700	ftnB	ftnB	ftnB	ftnBp
1	ECK120029858	ftnB	ftnB	ftnB	ftnBp2
2	ECK120008949	ftsAZ	mraZ-rsmH-ftsLI-murEF-mraY-murD-ftsW-murGC-ddlB-ftsQAZ-lpxC	ftsA,ftsZ	ftsAp1
1	ECK120033266	ftsK	ftsK	ftsK	ftsKp1
1	ECK120033267	ftsK	ftsK	ftsK	ftsKp2
14	ECK120033235	ftsLI-murEF-mraY-murD-ftsW-murGC-ddlB-ftsQAZ-lpxC	mraZ-rsmH-ftsLI-murEF-mraY-murD-ftsW-murGC-ddlB-ftsQAZ-lpxC	ftsL,ftsI,murE,murF,mraY,murD,ftsW,murG,murC,ddlB,ftsQ,ftsA,ftsZ,lpxC	ftsLp1
14	ECK120033236	ftsLI-murEF-mraY-murD-ftsW-murGC-ddlB-ftsQAZ-lpxC	mraZ-rsmH-ftsLI-murEF-mraY-murD-ftsW-murGC-ddlB-ftsQAZ-lpxC	ftsL,ftsI,murE,murF,mraY,murD,ftsW,murG,murC,ddlB,ftsQ,ftsA,ftsZ,lpxC	ftsLp2
3	ECK120009401	ftsQAZ	mraZ-rsmH-ftsLI-murEF-mraY-murD-ftsW-murGC-ddlB-ftsQAZ-lpxC	ftsQ,ftsA,ftsZ	ftsQp1
1	ECK120009009	ftsQ	mraZ-rsmH-ftsLI-murEF-mraY-murD-ftsW-murGC-ddlB-ftsQAZ-lpxC	ftsQ	ftsQp2
1	ECK120011112	ftsZ	mraZ-rsmH-ftsLI-murEF-mraY-murD-ftsW-murGC-ddlB-ftsQAZ-lpxC	ftsZ	ftsZp2
1	ECK120011113	ftsZ	mraZ-rsmH-ftsLI-murEF-mraY-murD-ftsW-murGC-ddlB-ftsQAZ-lpxC	ftsZ	ftsZp3
1	ECK120011114	ftsZ	mraZ-rsmH-ftsLI-murEF-mraY-murD-ftsW-murGC-ddlB-ftsQAZ-lpxC	ftsZ	ftsZp4
2	ECK120009327	fucAO	fucAO	fucA,fucO	fucAp
5	ECK120009320	fucPIKUR	fucPIKUR	fucP,fucI,fucK,fucU,fucR	fucPp
1	ECK120033576	fucR	fucPIKUR	fucR	fucRp
1	ECK120009296	fumA	fumAC	fumA	fumAp
2	ECK125146693	fumAC	fumAC	fumA,fumC	fumAp
1	ECK120009350	fumB	dcuB-fumB	fumB	fumBp
1	ECK120009297	fumC	fumAC	fumC	fumCp
1	ECK125142005	fumC	fumAC	fumC	fumCp1
1	ECK120009313	fur	fldA-uof-fur	fur	furpa
1	ECK120008947	fur	fldA-uof-fur	fur	furpb
2	ECK120009069	fusA-tufA	rpsLG-fusA-tufA	fusA,tufA	fusAp
1	ECK120008955	fxsA	fxsA	fxsA	fxsAp
3	ECK120008961	gabDTP	csiD-lhgO-gabDTP	gabD,gabT,gabP	gabDp1
3	ECK120009053	gabDTP	csiD-lhgO-gabDTP	gabD,gabT,gabP	gabDp2
2	ECK120009797	gadAX	gadAXW	gadA,gadX	gadAp
2	ECK120009757	gadBC	gadBC	gadB,gadC	gadBp
3	ECK120010978	gadE-mdtEF	gadE-mdtEF	gadE,mdtE,mdtF	gadEp
1	ECK120010968	gadE	gadE-mdtEF	gadE	gadEp1
1	ECK125095213	gadE	gadE-mdtEF	gadE	gadEp3
3	ECK120049210	gadE-mdtEF	gadE-mdtEF	gadE,mdtE,mdtF	gadEp4
1	ECK120035098	gadW	gadAXW	gadW	gadWp1
1	ECK120035099	gadW	gadAXW	gadW	gadWp2
1	ECK120008969	gadX	gadAXW	gadX	gadXp
2	ECK120033211	gadXW	gadAXW	gadX,gadW	gadXp
1	ECK120009100	gadY	gadY	gadY	gadYp
1	ECK125165935	galE	galETKM	galE	galEp1
2	ECK125165937	galET	galETKM	galE,galT	galEp1
3	ECK125165939	galETK	galETKM	galE,galT,galK	galEp1
4	ECK120009218	galETKM	galETKM	galE,galT,galK,galM	galEp1
1	ECK125165936	galE	galETKM	galE	galEp2
2	ECK125165938	galET	galETKM	galE,galT	galEp2
3	ECK125165940	galETK	galETKM	galE,galT,galK	galEp2
4	ECK120009219	galETKM	galETKM	galE,galT,galK,galM	galEp2
4	ECK120009036	galETKM	galETKM	galE,galT,galK,galM	galEp3
1	ECK120030172	galF	galF	galF	galFp
1	ECK125165941	galK	galETKM	galK	galKp
1	ECK120015171	galP	galP	galP	galPp
1	ECK120009186	galR	galR	galR	galRp
1	ECK120009217	galS	galS	galS	galSp
1	ECK120015321	galU	galU	galU	galUp
1	ECK120011108	gapA	gapA-yeaD	gapA	gapAp1
2	ECK120011066	gapA-yeaD	gapA-yeaD	gapA,yeaD	gapAp2
1	ECK120011109	gapA	gapA-yeaD	gapA	gapAp3	Sigma70
1	ECK120011110	gapA	gapA-yeaD	gapA	gapAp4	Sigma70
1	ECK125142006	gapA	gapA-yeaD	gapA	gapAp6
1	ECK125142007	gapA	gapA-yeaD	gapA	gapAp7
1	ECK120009025	garD	garD	garD	garDp
5	ECK120009770	garPLRK-rnpB	garPLRK-rnpB	garP,garL,garR,garK,rnpB	garPp	Sigma70
1	ECK120015346	gatR_2	gatR_2	gatR_2	gatR_2p
6	ECK120009360	gatYZABCD	gatYZABCD	gatY,gatZ,gatA,gatB,gatC,gatD	gatYp	Sigma70
5	ECK120034147	gatZABCD	gatYZABCD	gatZ,gatA,gatB,gatC,gatD	gatZp
1	ECK120008966	gcd	gcd	gcd	gcdp1	Sigma70
1	ECK120009178	gcd	gcd	gcd	gcdp2
7	ECK120015331	gcl-hyi-glxR-ybbW-allB-ybbY-glxK	gcl-hyi-glxR-ybbW-allB-ybbY-glxK	gcl,hyi,glxR,ybbW,allB,ybbY,glxK	gclp	Sigma70
1	ECK120009362	gcvA	gcvA	gcvA	gcvAp	Sigma70
1	ECK120009114	gcvB	gcvB	gcvB	gcvBp	Sigma70
1	ECK120033579	gcvP	gcvTHP	gcvP	gcvPp
1	ECK120011139	gcvR	gcvR	gcvR	gcvRp	Sigma70
1	ECK125165379	gcvR	gcvR	gcvR	gcvRp2	Sigma70
3	ECK120009361	gcvTHP	gcvTHP	gcvT,gcvH,gcvP	gcvTp	Sigma70
1	ECK120008942	gdhA	gdhA	gdhA	gdhAp1	Sigma70
1	ECK120026814	gfcA	gfcA	gfcA	gfcAp	Sigma70
2	ECK125162171	ghoST	ghoST	ghoS,ghoT	ghoSp
2	ECK120033592	glcBA	glcDEFGBA	glcB,glcA	glcBp
1	ECK120008963	glcC	glcC	glcC	glcCp	Sigma70
6	ECK120008962	glcDEFGBA	glcDEFGBA	glcD,glcE,glcF,glcG,glcB,glcA	glcDp	Sigma70
2	ECK125134705	glgAP	glgBXCAP	glgA,glgP	glgAp	Sigma70
5	ECK120030132	glgBXCAP	glgBXCAP	glgB,glgX,glgC,glgA,glgP	glgBp	Sigma70
3	ECK120009314	glgCAP	glgBXCAP	glgC,glgA,glgP	glgCp1	Sigma70
3	ECK120009651	glgCAP	glgBXCAP	glgC,glgA,glgP	glgCp2
3	ECK120009652	glgCAP	glgBXCAP	glgC,glgA,glgP	glgCp3	Sigma38
1	ECK120009468	glgS	glgS	glgS	glgSp1	Sigma38
1	ECK120009605	glgS	glgS	glgS	glgSp2	Sigma38
1	ECK120015320	glk	glk	glk	glkp	Sigma70
1	ECK120034149	glk	glk	glk	glkp1	Sigma70
2	ECK120009469	glmUS	glmUS	glmU,glmS	glmUp1	Sigma70
2	ECK120009670	glmUS	glmUS	glmU,glmS	glmUp2	Sigma70
1	ECK120027351	glmY	glmY	glmY	glmYp1	Sigma54
1	ECK125095423	glmY	glmY	glmY	glmYp2	Sigma70
1	ECK120020464	glmZ	glmZ	glmZ	glmZp	Sigma70
1	ECK120009105	glnA	glnALG	glnA	glnAp1	Sigma70
3	ECK120009220	glnALG	glnALG	glnA,glnL,glnG	glnAp1	Sigma70
1	ECK120009106	glnA	glnALG	glnA	glnAp2	Sigma54
3	ECK120009222	glnALG	glnALG	glnA,glnL,glnG	glnAp2	Sigma54
1	ECK120009655	glnB	glrR-glnB	glnB	glnBp1	Sigma70
1	ECK120009282	glnB	glrR-glnB	glnB	glnBp2	Sigma70
1	ECK120009656	glnB	glrR-glnB	glnB	glnBp3
1	ECK125109847	glnD	map-glnD-dapD	glnD	glnDp
3	ECK120009155	glnHPQ	glnHPQ	glnH,glnP,glnQ	glnHp1
3	ECK120009363	glnHPQ	glnHPQ	glnH,glnP,glnQ	glnHp2	Sigma54
2	ECK120009798	glnK-amtB	glnK-amtB	glnK,amtB	glnKp	Sigma54
2	ECK120009221	glnLG	glnALG	glnL,glnG	glnLp	Sigma70
1	ECK120015499	glnQ	glnHPQ	glnQ	glnQp	Sigma70
1	ECK120011058	glnS	glnS	glnS	glnSp1
1	ECK120033556	glnS	glnS	glnS	glnSp2	Sigma32
4	ECK120033762	glnW-metU-glnVX	metT-leuW-glnUW-metU-glnVX	glnW,metU,glnV,glnX	glnWp
1	ECK120015509	gloA	nemRA-gloA	gloA	gloAp	Sigma70
3	ECK120009223	glpABC	glpABC	glpA,glpB,glpC	glpABCp	Sigma70
1	ECK120009224	glpD	glpD	glpD	glpDp	Sigma70
3	ECK120009759	glpEGR	glpEGR	glpE,glpG,glpR	glpEp
3	ECK120009364	glpFKX	glpFKX	glpF,glpK,glpX	glpFp	Sigma70
2	ECK120009760	glpGR	glpEGR	glpG,glpR	glpGp
1	ECK120009761	glpR	glpEGR	glpR	glpRp1
1	ECK120009762	glpR	glpEGR	glpR	glpRp2
2	ECK120009407	glpTQ	glpTQ	glpT,glpQ	glpTQp	Sigma70
1	ECK120010961	glrK	glrK	glrK	glrKp	Sigma70
1	ECK120009298	gltA	gltA	gltA	gltAp1	Sigma70
1	ECK120009601	gltA	gltA	gltA	gltAp2
3	ECK120009373	gltBDF	gltBDF	gltB,gltD,gltF	gltBp	Sigma70
5	ECK125199575	gltI-sroC-gltJKL	gltI-sroC-gltJKL	gltI,sroC,gltJ,gltK,gltL	gltIp
5	ECK120016723	gltI-sroC-gltJKL	gltI-sroC-gltJKL	gltI,sroC,gltJ,gltK,gltL	gltIp1	Sigma70
1	ECK120009137	gltX	gltX	gltX	gltXp1	Sigma70
1	ECK120009136	gltX	gltX	gltX	gltXp2	Sigma70
1	ECK120009123	gltX	gltX	gltX	gltXp3	Sigma70
1	ECK120033578	glxK	gcl-hyi-glxR-ybbW-allB-ybbY-glxK	glxK	glxKp
1	ECK120009383	glyA	glyA	glyA	glyAp	Sigma70
2	ECK120009470	glyQS	glyQS	glyQ,glyS	glyQp	Sigma70
1	ECK120011118	glyU	glyU	glyU	glyUp	Sigma70
3	ECK120009687	glyVXY	glyVXY	glyV,glyX,glyY	glyVp	Sigma70
3	ECK120009694	glyW-cysT-leuZ	glyW-cysT-leuZ	glyW,cysT,leuZ	glyWp	Sigma70
1	ECK120026553	gmhB	gmhB	gmhB	gmhBp
1	ECK120027681	gmk	gmk	gmk	gmkp	Sigma70
1	ECK120010941	pdeR	pdeR	pdeR	gmrp	Sigma38
1	ECK120011069	gnd	gnd	gnd	gndp	Sigma70
1	ECK120027017	gnsB	gnsB	gnsB	gnsBp
1	ECK125158018	gntK	gntRKU	gntK	gntKp	Sigma70
2	ECK120009418	gntKU	gntRKU	gntK,gntU	gntKp	Sigma70
1	ECK120009058	gntP	gntP	gntP	gntPp	Sigma70
1	ECK120009032	gntR	gntRKU	gntR	gntRp2	Sigma70
1	ECK120009033	gntR	gntRKU	gntR	gntRp3
1	ECK120009034	gntR	gntRKU	gntR	gntRp4
1	ECK120009419	gntT	gntT	gntT	gntTp1	Sigma70
1	ECK120009057	gntT	gntT	gntT	gntTp2
1	ECK120009056	gntT	gntT	gntT	gntTp3
2	ECK120009059	gntX-nfuA	gntX-nfuA	gntX,nfuA	gntXp	Sigma70
1	ECK120015311	gor	gor	gor	gorp	Sigma70
1	ECK120010921	gpmA	gpmA	gpmA	gpmAp	Sigma70
1	ECK125109872	gpmA	gpmA	gpmA	gpmAp2	Sigma70
3	ECK120027675	gpmM-envC-yibQ	gpmM-envC-yibQ	gpmM,envC,yibQ	gpmMp
3	ECK125136340	gpmM-envC-yibQ	gpmM-envC-yibQ	gpmM,envC,yibQ	gpmMp2	Sigma38
1	ECK120034540	gpt	gpt	gpt	gptp	Sigma70
1	ECK120008925	grcA	grcA	grcA	grcAp1	Sigma70
1	ECK125165934	grcA	grcA	grcA	grcAp2
1	ECK125095430	greA	greA	greA	greAp1	Sigma70
1	ECK120016560	greA	greA	greA	greAp2	Sigma24
1	ECK120034181	groL	groSL	groL	groLp1
1	ECK120034182	groL	groSL	groL	groLp2
1	ECK120034183	groL	groSL	groL	groLp3
2	ECK120009061	groSL	groSL	groS,groL	groSp	Sigma32
1	ECK120009597	grpE	grpE	grpE	grpEp	Sigma32
1	ECK120009817	grxA	grxA	grxA	grxAp
1	ECK120026835	grxB	grxB	grxB	grxBp	Sigma70
1	ECK120021219	grxD	grxD	grxD	grxD	Sigma70
2	ECK120030199	gspAB	gspAB	gspA,gspB	gspAp1	Sigma70
2	ECK120030200	gspAB	gspAB	gspA,gspB	gspAp2	Sigma70
2	ECK120030198	gspAB	gspAB	gspA,gspB	gspAp3
2	ECK120016729	gspAB	gspAB	gspA,gspB	gspAp4	Sigma24
12	ECK120030197	gspCDEFGHIJKLMO	gspCDEFGHIJKLMO	gspC,gspD,gspE,gspF,gspG,gspH,gspI,gspJ,gspK,gspL,gspM,gspO	gspCp1
12	ECK120030196	gspCDEFGHIJKLMO	gspCDEFGHIJKLMO	gspC,gspD,gspE,gspF,gspG,gspH,gspI,gspJ,gspK,gspL,gspM,gspO	gspCp2	Sigma70
12	ECK120027591	gspCDEFGHIJKLMO	gspCDEFGHIJKLMO	gspC,gspD,gspE,gspF,gspG,gspH,gspI,gspJ,gspK,gspL,gspM,gspO	gspCp3	Sigma70
1	ECK120027501	gss	gss	gss	gssp
1	ECK120027049	gstA	gstA	gstA	gstAp
1	ECK120021062	gstB	gstB	gstB	gstBp
2	ECK120009396	guaBA	guaBA	guaB,guaA	guaBp	Sigma70
3	ECK120009026	gudPXD	gudPXD	gudP,gudX,gudD	gudPp
1	ECK120009332	gyrA	gyrA	gyrA	gyrAp	Sigma70
1	ECK120008979	gyrB	gyrB	gyrB	gyrBp	Sigma70
5	ECK120015153	hcaEFCBD	hcaEFCBD	hcaE,hcaF,hcaC,hcaB,hcaD	hcaEp
1	ECK120015176	hcaR	hcaR	hcaR	hcaRp
1	ECK120027158	hchA	hchA	hchA	hchAp	Sigma70
1	ECK120030780	hchA	hchA	hchA	hchAp2	Sigma38
2	ECK120009181	hcp-hcr	hcp-hcr	hcp,hcr	hcpp
2	ECK120033238	hcp-hcr	hcp-hcr	hcp,hcr	hcpp2	Sigma24
1	ECK120027333	hda	hda	hda	hdap
3	ECK120009471	hdeAB-yhiD	hdeAB-yhiD	hdeA,hdeB,yhiD	hdeAp	Sigma38
1	ECK120010970	hdeD	hdeD	hdeD	hdeDp	Sigma70
1	ECK120021222	hdfR	hdfR	hdfR	hdfRp	Sigma38
1	ECK120027045	hdhA	hdhA	hdhA	hdhAp
1	ECK120021223	helD	helD	helD	helDp
3	ECK120009019	hemA-prfA-prmC	hemA-prfA-prmC	hemA,prfA,prmC	hemAp1	Sigma70
1	ECK120009020	hemA	hemA-prfA-prmC	hemA	hemAp2
1	ECK120008987	hemF	amiA-hemF	hemF	hemFp	Sigma70
1	ECK120026661	hemH	hemH	hemH	hemHp	Sigma70
1	ECK120015491	hemL	hemL	hemL	hemLp	Sigma28
1	ECK125109027	hemL	hemL	hemL	hemLp1	Sigma28
1	ECK125109028	hemL	hemL	hemL	hemLp2	Sigma28
1	ECK120009130	hemN	hemN	hemN	hemNp	Sigma70
2	ECK120010940	hepA-rluA	hepA-rluA	hepA,rluA	hepAp	Sigma70
1	ECK120033568	hepA	hepA-rluA	hepA	hepAp2	Sigma32
2	ECK120009247	hflD-purB	hflD-purB	hflD,purB	hflDp	Sigma70
4	ECK120033604	hfq-hflXKC	yjeF-tsaE-amiB-mutL-miaA-hfq-hflXKC	hfq,hflX,hflK,hflC	hfqp1
4	ECK120033597	hfq-hflXKC	yjeF-tsaE-amiB-mutL-miaA-hfq-hflXKC	hfq,hflX,hflK,hflC	hfqp2	Sigma70
4	ECK120033605	hfq-hflXKC	yjeF-tsaE-amiB-mutL-miaA-hfq-hflXKC	hfq,hflX,hflK,hflC	hfqp3	Sigma70
2	ECK120026966	hicAB	hicAB	hicA,hicB	hicAp	Sigma70
2	ECK120027534	higBA	higBA	higB,higA	higBp	Sigma70
2	ECK120009473	hipBA	hipBA	hipB,hipA	hipBp	Sigma70
5	ECK120009156	hisBHAFI	hisLGDCBHAFI	hisB,hisH,hisA,hisF,hisI	hisBp	Sigma70
4	ECK120030805	hisJQMP	argT-hisJQMP	hisJ,hisQ,hisM,hisP	hisJp	Sigma70
1	ECK125158017	hisL	hisLGDCBHAFI	hisL	hisLp
9	ECK120009474	hisLGDCBHAFI	hisLGDCBHAFI	hisL,hisG,hisD,hisC,hisB,hisH,hisA,hisF,hisI	hisLp
1	ECK120011071	hisS	hisS	hisS	hisSp	Sigma70
4	ECK120010943	skp-lpxD-fabZ-lpxA	bamA-skp-lpxD-fabZ-lpxAB-rnhB-dnaE	skp,lpxD,fabZ,lpxA	hlpAp	Sigma24
1	ECK120009794	hlyE	hlyE	hlyE	hlyEp
1	ECK120011072	hmp	hmp	hmp	hmpAp	Sigma38
1	ECK120009331	hns	hns	hns	hnsp	Sigma70
4	ECK120027605	hofMNOP	hofMNOP	hofM,hofN,hofO,hofP	hofMp	Sigma38
1	ECK120015368	hokE	hokE	hokE	hokEp	Sigma24
2	ECK120033563	holC-valS	holC-valS	holC,valS	holCp	Sigma32
3	ECK120027887	holD-rimI-yjjG	holD-rimI-yjjG	holD,rimI,yjjG	holDp
1	ECK120010904	hpt	hpt	hpt	hptp	Sigma70
4	ECK120009608	hscBA-fdx-iscX	hscBA-fdx-iscX	hscB,hscA,fdx,iscX	hscBp	Sigma70
1	ECK120026943	hslJ	hslJ	hslJ	hslJp	Sigma70
2	ECK120033566	hslRO	yrfG-hslRO	hslR,hslO	hslRp	Sigma32
2	ECK120009476	hslVU	hslVU	hslV,hslU	hslVp	Sigma32
1	ECK120026808	hspQ	hspQ	hspQ	hspQp
1	ECK120009591	htgA	htgA	htgA	htgAp1	Sigma32
1	ECK120009592	htgA	htgA	htgA	htgAp2
1	ECK120009587	htpG	htpG	htpG	htpGp1	Sigma32
1	ECK120009588	htpG	htpG	htpG	htpGp2	Sigma32
1	ECK125095426	htpG	htpG	htpG	htpGp3	Sigma54
1	ECK120009586	htpX	htpX	htpX	htpXp	Sigma32
1	ECK120009773	hupA	hupA	hupA	hupAp
1	ECK120009774	hupB	hupB	hupB	hupBp1
1	ECK120009775	hupB	hupB	hupB	hupBp2	Sigma70
1	ECK120009776	hupB	hupB	hupB	hupBp3	Sigma70
1	ECK120009777	hupB	hupB	hupB	hupBp4
6	ECK120009477	hyaABCDEF	hyaABCDEF	hyaA,hyaB,hyaC,hyaD,hyaE,hyaF	hyaAp	Sigma70
8	ECK120009478	hybOABCDEFG	hybOABCDEFG	hybO,hybA,hybB,hybC,hybD,hybE,hybF,hybG	hybOp1	Sigma70
9	ECK120009344	hycABCDEFGHI	hycABCDEFGHI	hycA,hycB,hycC,hycD,hycE,hycF,hycG,hycH,hycI	hycAp	Sigma54
2	ECK120009764	hydN-hypF	hydN-hypF	hydN,hypF	hydNp	Sigma54
12	ECK120009812	hyfABCDEFGHIJR-focB	hyfABCDEFGHIJR-focB	hyfA,hyfB,hyfC,hyfD,hyfE,hyfF,hyfG,hyfH,hyfI,hyfJ,hyfR,focB	hyfAp	Sigma54
5	ECK120009345	hypABCDE	hypABCDE-fhlA	hypA,hypB,hypC,hypD,hypE	hypAp	Sigma54
6	ECK120016221	hypABCDE-fhlA	hypABCDE-fhlA	hypA,hypB,hypC,hypD,hypE,fhlA	hypAp	Sigma54
4	ECK120009609	hypBCDE	hypABCDE-fhlA	hypB,hypC,hypD,hypE	hypBp
5	ECK120016222	hypBCDE-fhlA	hypABCDE-fhlA	hypB,hypC,hypD,hypE,fhlA	hypBp
1	ECK120030638	hypF	hydN-hypF	hypF	hypFp1
1	ECK120030639	hypF	hydN-hypF	hypF	hypFp2	Sigma70
1	ECK120030640	hypF	hydN-hypF	hypF	hypFp3	Sigma70
5	ECK120026769	iaaA-gsiABCD	iaaA-gsiABCD	iaaA,gsiA,gsiB,gsiC,gsiD	iaaAp
2	ECK125145764	ibaG-murA	ibaG-murA	ibaG,murA	ibaGp
1	ECK120027567	ibaG	ibaG-murA	ibaG	ibaGp2	Sigma24
2	ECK120009593	ibpAB	ibpAB	ibpA,ibpB	ibpAp	Sigma32
1	ECK120009060	ibpB	ibpAB	ibpB	ibpBp	Sigma54
1	ECK120009299	icd	icd	icd	icdAp1	Sigma70
1	ECK120009610	icd	icd	icd	icdAp2	Sigma70
1	ECK120009021	iclR	iclR	iclR	iclRp
4	ECK120009042	idnDOTR	idnDOTR	idnD,idnO,idnT,idnR	idnDp
1	ECK120009041	idnK	idnK	idnK	idnKp	Sigma70
1	ECK120009055	idnR	idnDOTR	idnR	idnRp	Sigma70
1	ECK120009365	ihfA	thrS-infC-rpmI-rplT-pheMST-ihfA	ihfA	ihfAp4	Sigma38
1	ECK120009366	ihfB	cmk-rpsA-ihfB	ihfB	ihfBp	Sigma38
4	ECK120030634	ileS-lspA-fkpB-ispH	ribF-ileS-lspA-fkpB-ispH	ileS,lspA,fkpB,ispH	ileSp1	Sigma70
4	ECK120030635	ileS-lspA-fkpB-ispH	ribF-ileS-lspA-fkpB-ispH	ileS,lspA,fkpB,ispH	ileSp2
4	ECK120033554	ileS-lspA-fkpB-ispH	ribF-ileS-lspA-fkpB-ispH	ileS,lspA,fkpB,ispH	ileSp3	Sigma32
1	ECK120009684	ileX	ileX	ileX	ileXp	Sigma70
1	ECK120009157	ilvA	ilvLXG_1G_2MEDA	ilvA	ilvAp
1	ECK120009283	ilvC	ilvC	ilvC	ilvCp	Sigma70
3	ECK120009787	ilvEDA	ilvLXG_1G_2MEDA	ilvE,ilvD,ilvA	ilvEp3
2	ECK120009274	ilvIH	ilvIH	ilvI,ilvH	ilvIHp1	Sigma70
2	ECK120009175	ilvIH	ilvIH	ilvI,ilvH	ilvIp2
2	ECK120009173	ilvIH	ilvIH	ilvI,ilvH	ilvIp3	Sigma70
2	ECK120009174	ilvIH	ilvIH	ilvI,ilvH	ilvIp4	Sigma70
1	ECK125158022	ilvL	ilvLXG_1G_2MEDA	ilvL	ilvLp1	Sigma70
8	ECK120009785	ilvLXG_1G_2MEDA	ilvLXG_1G_2MEDA	ilvL,ilvX,ilvG_1,ilvG_2,ilvM,ilvE,ilvD,ilvA	ilvLp1	Sigma70
1	ECK125158023	ilvL	ilvLXG_1G_2MEDA	ilvL	ilvLp2	Sigma70
8	ECK120009786	ilvLXG_1G_2MEDA	ilvLXG_1G_2MEDA	ilvL,ilvX,ilvG_1,ilvG_2,ilvM,ilvE,ilvD,ilvA	ilvLp2	Sigma70
1	ECK120009226	ilvY	ilvY	ilvY	ilvYp	Sigma70
1	ECK120010953	lptD	lptD-surA-pdxA-rsmA-apaGH	lptD	impp1	Sigma70
1	ECK120010954	lptD	lptD-surA-pdxA-rsmA-apaGH	lptD	impp2	Sigma70
3	ECK120010955	lptD-surA-pdxA	lptD-surA-pdxA-rsmA-apaGH	lptD,surA,pdxA	impp3	Sigma24
1	ECK120010900	inaA	inaA	inaA	inaAp	Sigma70
1	ECK120016554	infA	infA	infA	infAp1	Sigma70
1	ECK120016553	infA	infA	infA	infAp2	Sigma70
1	ECK120011064	infC	thrS-infC-rpmI-rplT-pheMST-ihfA	infC	infCp
3	ECK120010919	infC-rpmI-rplT	thrS-infC-rpmI-rplT-pheMST-ihfA	infC,rpmI,rplT	infCp2	Sigma70
3	ECK120027139	insA-5AB-5B-5	insAB-5A-5B-5	insA-5,insAB-5,insB-5	insA-5p
6	ECK120027524	insC-5CD-5D-5-yqiGHI	insC-5CD-5D-5-yqiGHI	insC-5,insCD-5,insD-5,yqiG,yqiH,yqiI	insC-5p	Sigma38
1	ECK120015364	insK	insK	insK	insKp	Sigma24
3	ECK120026577	insN-1I-1O-1	insN-1I-1O-1	insN-1,insI-1,insO-1	insN-1p	Sigma38
1	ECK120027856	insN-2	insN-2	insN-2	insNp
1	ECK120027289	intS	intS	intS	intSp	Sigma70
1	ECK125095419	iraD	iraD	iraD	iraDp1	Sigma70
1	ECK120021054	iraD	iraD	iraD	iraDp2	Sigma38
1	ECK120026861	iraM	iraM	iraM	iraMp
1	ECK125134719	iraM	iraM	iraM	iraMp2	Sigma70
1	ECK120026626	iraP	iraP	iraP	iraPp1	Sigma70
1	ECK120034122	iraP	iraP	iraP	iraPp2
4	ECK120008960	iscRSUA	iscRSUA	iscR,iscS,iscU,iscA	iscRp	Sigma70
1	ECK120030165	ispU	ispU	ispU	ispUp1
1	ECK120034118	ispU	ispU	ispU	ispUp2
1	ECK120015175	istR-1	istR-1	istR-1	istR-1p	Sigma70
1	ECK120015152	istR-2	istR-2	istR-2	istR-2p	Sigma70
1	ECK125158019	ivbL	ivbL-ilvBN-uhpABC	ivbL	ivbLp	Sigma70
3	ECK120009225	ivbL-ilvBN	ivbL-ilvBN-uhpABC	ivbL,ilvB,ilvN	ivbLp	Sigma70
1	ECK120009131	katE	katE	katE	katEp	Sigma38
1	ECK120009227	katG	katG	katG	katGp	Sigma70
4	ECK120009141	kbaZ-agaVWA	kbaZ-agaVWA	kbaZ,agaV,agaW,agaA	kbaZp	Sigma70
2	ECK120009415	kbl-tdh	kbl-tdh	kbl,tdh	kblp	Sigma70
4	ECK120009228	kdpFABC	kdpFABC	kdpF,kdpA,kdpB,kdpC	kdpFp	Sigma70
1	ECK120009738	kdsA	ychQA-kdsA	kdsA	kdsAp	Sigma70
4	ECK120030121	kdsC-lptCAB	yrbG-kdsDC-lptCAB-rpoN-hpf-ptsN-rapZ-npr	kdsC,lptC,lptA,lptB	kdsCp1	Sigma70
4	ECK125135006	kdsC-lptCAB	yrbG-kdsDC-lptCAB-rpoN-hpf-ptsN-rapZ-npr	kdsC,lptC,lptA,lptB	kdsCp2	Sigma70
4	ECK125135007	kdsC-lptCAB	yrbG-kdsDC-lptCAB-rpoN-hpf-ptsN-rapZ-npr	kdsC,lptC,lptA,lptB	kdsCp3	Sigma70
1	ECK120026655	mscK	mscK	mscK	kefAp
1	ECK120027708	kup	kup	kup	kupp1
1	ECK120034171	kup	kup	kup	kupp2
1	ECK120034172	kup	kup	kup	kupp3
1	ECK120011054	lacI	mhpR-lacI	lacI	lacIp
2	ECK120033582	lacYA	lacZYA	lacY,lacA	lacYp
3	ECK120009229	lacZYA	lacZYA	lacZ,lacY,lacA	lacZp1	Sigma70
3	ECK120009044	lacZYA	lacZYA	lacZ,lacY,lacA	lacZp2
3	ECK120009043	lacZYA	lacZYA	lacZ,lacY,lacA	lacZp3
3	ECK120009045	lacZYA	lacZYA	lacZ,lacY,lacA	lacZp4
2	ECK120026904	lapAB	lapAB-pyrF-yciH	lapA,lapB	lapAp1	Sigma32
4	ECK120033561	lapAB-pyrF-yciH	lapAB-pyrF-yciH	lapA,lapB,pyrF,yciH	lapAp1	Sigma32
2	ECK125165932	lapAB	lapAB-pyrF-yciH	lapA,lapB	lapAp2	Sigma70
1	ECK120008926	ldcC	ldcC	ldcC	ldcCp
1	ECK120016405	ldhA	ldhA	ldhA	ldhAp	Sigma32
1	ECK120021260	ldrD	ldrD	ldrD	ldrDp
2	ECK120009177	lepAB	lepAB	lepA,lepB	lepAp
1	ECK125160640	leuE	leuE	leuE	leuEp
1	ECK125158014	leuL	leuLABCD	leuL	leuLp	Sigma70
5	ECK120009370	leuLABCD	leuLABCD	leuL,leuA,leuB,leuC,leuD	leuLp	Sigma70
5	ECK125141553	leuLABCD	leuLABCD	leuL,leuA,leuB,leuC,leuD	leuLp2
1	ECK120026524	leuO	leuO	leuO	leuOp	Sigma70
1	ECK125141551	leuO	leuO	leuO	leuOp1
1	ECK125141552	leuO	leuO	leuO	leuOp2
3	ECK120009702	leuQPV	leuQPV	leuQ,leuP,leuV	leuQp	Sigma70
1	ECK120009699	leuU	secG-leuU	leuU	leuUp	Sigma70
1	ECK120009688	leuX	leuX	leuX	leuXp	Sigma70
2	ECK120009230	lexA-dinF	lexA-dinF	lexA,dinF	lexAp	Sigma70
1	ECK120016727	lhr	rnt-lhr	lhr	lhrp	Sigma24
2	ECK120027309	ligA-ypeB	ligA-ypeB	ligA,ypeB	ligAp
1	ECK120026712	lipA	lipA	lipA	lipAp
1	ECK120009374	livJ	livJ	livJ	livJp	Sigma70
5	ECK120009375	livKHMGF	livKHMGF	livK,livH,livM,livG,livF	livKp1	Sigma70
5	ECK120009641	livKHMGF	livKHMGF	livK,livH,livM,livG,livF	livKp2
3	ECK120009720	lldPRD	lldPRD	lldP,lldR,lldD	lldPp	Sigma70
1	ECK120027905	loiP	loiP	loiP	loiPp	Sigma70
2	ECK120026785	lolA-rarA	lolA-rarA	lolA,rarA	lolAp	Sigma70
3	ECK120015373	lolB-ispE-prs	lolB-ispE-prs	lolB,ispE,prs	lolBp	Sigma28
1	ECK120011097	lon	clpPX-lon	lon	lonp	Sigma32
1	ECK120009704	lpd	pdhR-aceEF-lpd	lpd	lpdAp	Sigma70
1	ECK120009132	lpp	lpp	lpp	lpp
1	ECK120016564	lpp	lpp	lpp	lppp2
2	ECK120030122	lptAB	yrbG-kdsDC-lptCAB-rpoN-hpf-ptsN-rapZ-npr	lptA,lptB	lptAp1	Sigma24
2	ECK125135008	lptAB	yrbG-kdsDC-lptCAB-rpoN-hpf-ptsN-rapZ-npr	lptA,lptB	lptAp2	Sigma70
5	ECK120016561	lptB-rpoN-hpf-ptsN-rapZ	yrbG-kdsDC-lptCAB-rpoN-hpf-ptsN-rapZ-npr	lptB,rpoN,hpf,ptsN,rapZ	lptBp	Sigma24
1	ECK120026526	lpxC	mraZ-rsmH-ftsLI-murEF-mraY-murD-ftsW-murGC-ddlB-ftsQAZ-lpxC	lpxC	lpxCp1	Sigma70
1	ECK120034115	lpxC	mraZ-rsmH-ftsLI-murEF-mraY-murD-ftsW-murGC-ddlB-ftsQAZ-lpxC	lpxC	lpxCp2
1	ECK120010944	lpxD	bamA-skp-lpxD-fabZ-lpxAB-rnhB-dnaE	lpxD	lpxDp	Sigma24
1	ECK120009187	lpxL	lpxL	lpxL	lpxLp
1	ECK120010924	lpxP	lpxP	lpxP	lpxPp	Sigma24
1	ECK120009613	lrhA	lrhA	lrhA	lrhAp
1	ECK120009372	lrp	lrp	lrp	lrpp	Sigma70
3	ECK120029296	lspA-fkpB-ispH	ribF-ileS-lspA-fkpB-ispH	lspA,fkpB,ispH	lspAp	Sigma70
7	ECK120015341	lsrACDBFG-tam	lsrACDBFG-tam	lsrA,lsrC,lsrD,lsrB,lsrF,lsrG,tam	lsrAp	Sigma38
2	ECK120026997	lsrRK	lsrRK	lsrR,lsrK	lsrRp	Sigma70
2	ECK120034127	ltaE-ybjT	poxB-ltaE-ybjT	ltaE,ybjT	ltaEp
1	ECK125134702	luxS	luxS	luxS	luxSp1	Sigma38
1	ECK120021263	luxS	luxS	luxS	luxSp2
1	ECK120009376	lysA	lysA	lysA	lysAp	Sigma70
1	ECK120011125	lysC	lysC	lysC	lysCp1	Sigma70
1	ECK120011124	lysC	lysC	lysC	lysCp2	Sigma70
1	ECK120026782	lysO	lysO	lysO	lysOp	Sigma70
1	ECK120011141	lysP	lysP	lysP	lysPp	Sigma70
1	ECK120009377	lysR	lysR	lysR	lysRp	Sigma70
3	ECK120009674	lysT-valT-lysW	lysT-valT-lysW	lysT,valT,lysW	lysTp	Sigma70
1	ECK120009411	lysU	lysU	lysU	lysUp1	Sigma70
1	ECK120009614	lysU	lysU	lysU	lysUp2
3	ECK120009231	malEFG	malEFG	malE,malF,malG	malEp	Sigma70
1	ECK120009378	malI	malI	malI	malIp	Sigma70
3	ECK120009315	malK-lamB-malM	malK-lamB-malM	malK,lamB,malM	malKp	Sigma70
2	ECK120009232	malPQ	malPQ	malP,malQ	malPp	Sigma70
1	ECK120016693	malQ	malPQ	malQ	malQp	Sigma24
1	ECK120009329	malS	malS	malS	malSp	Sigma70
1	ECK120009284	malT	malT	malT	malTp	Sigma70
2	ECK120009324	malXY	malXY	malX,malY	malXp	Sigma70
1	ECK120009082	malZ	malZ	malZ	malZp
1	ECK120011061	manA	manA	manA	manAp	Sigma70
3	ECK120009387	manXYZ	manXYZ	manX,manY,manZ	manXp	Sigma70
1	ECK120021241	marC	marC	marC	marCp
3	ECK120009381	marRAB	marRAB	marR,marA,marB	marRp	Sigma70
1	ECK120026595	ecpR	ecpR	ecpR	matAp1	Sigma24
1	ECK120026594	ecpA	ecpA	ecpA	matBp5	Sigma70
4	ECK120026593	ecpBCDE	ecpBCDE	ecpB,ecpC,ecpD,ecpE	matCp1
4	ECK120034120	ecpBCDE	ecpBCDE	ecpB,ecpC,ecpD,ecpE	matCp2
1	ECK120021102	matP	matP	matP	matPp
3	ECK120009783	mazEFG	relA-mazEFG	mazE,mazF,mazG	mazEp1
3	ECK120009784	mazEFG	relA-mazEFG	mazE,mazF,mazG	mazEp2
1	ECK120021253	mcaS	mcaS	mcaS	mcaSp
1	ECK120026762	mcbA	mcbA	mcbA	mcbAp5	Sigma70
1	ECK120009300	mdh	mdh	mdh	mdhp1	Sigma70
1	ECK120049212	mdh	mdh	mdh	mdhp2
2	ECK120009485	opgGH	opgGH	opgG,opgH	mdoGp1	Sigma70
2	ECK120009013	opgGH	opgGH	opgG,opgH	mdoGp2	Sigma70
6	ECK120015342	mdtABCD-baeSR	mdtABCD-baeSR	mdtA,mdtB,mdtC,mdtD,baeS,baeR	mdtAp	Sigma38
2	ECK120027641	mdtEF	gadE-mdtEF	mdtE,mdtF	mdtEp1
2	ECK120035088	mdtEF	gadE-mdtEF	mdtE,mdtF	mdtEp2
2	ECK120035089	mdtEF	gadE-mdtEF	mdtE,mdtF	mdtEp3
2	ECK120009323	melAB	melAB	melA,melB	melAp	Sigma70
1	ECK120009233	melR	melR	melR	melRp	Sigma70
2	ECK120010877	menA-rraA	menA-rraA	menA,rraA	menAp	Sigma70
2	ECK120034178	menA-rraA	menA-rraA	menA,rraA	menAp1
5	ECK120033758	menDHBCE	menFDHBCE	menD,menH,menB,menC,menE	menDp
1	ECK120027240	mepS	mepS	mepS	mepSp
1	ECK125165384	mepS	mepS	mepS	mepSp2
1	ECK120009234	metA	metA	metA	metAp1	Sigma32
1	ECK120009065	metA	metA	metA	metAp2	Sigma70
2	ECK120009005	metBL	metBL	metB,metL	metBp	Sigma70
1	ECK120009382	metC	metC	metC	metCp	Sigma70
1	ECK120015513	metE	metE	metE	metEp
1	ECK120009408	metF	metF	metF	metFp	Sigma70
1	ECK120027209	metG	metG	metG	metGp	Sigma70
1	ECK125203402	metG	metG	metG	metGp2	Sigma70
1	ECK120009235	metH	metH	metH	metHp	Sigma70
1	ECK125140833	metH	metH	metH	metHp2	Sigma70
1	ECK120008983	metJ	metJ	metJ	metJp1
1	ECK120008984	metJ	metJ	metJ	metJp2	Sigma70
1	ECK120008985	metJ	metJ	metJ	metJp3	Sigma70
1	ECK120010896	metK	metK	metK	metKp	Sigma70
3	ECK120008970	metNIQ	metNIQ	metN,metI,metQ	metNp	Sigma70
1	ECK120015514	metR	metR	metR	metRp1
1	ECK120015515	metR	metR	metR	metRp2
7	ECK120009689	metT-leuW-glnUW-metU-glnVX	metT-leuW-glnUW-metU-glnVX	metT,leuW,glnU,glnW,metU,glnV,glnX	metTp	Sigma70
1	ECK120009740	metY	metY-rimP-nusA-infB-rbfA-truB-rpsO-pnp	metY	metYp1	Sigma70
4	ECK120009698	metY-rimP-nusA-infB	metY-rimP-nusA-infB-rbfA-truB-rpsO-pnp	metY,rimP,nusA,infB	metYp1	Sigma70
8	ECK120009116	metY-rimP-nusA-infB-rbfA-truB-rpsO-pnp	metY-rimP-nusA-infB-rbfA-truB-rpsO-pnp	metY,rimP,nusA,infB,rbfA,truB,rpsO,pnp	metYp1	Sigma70
1	ECK120020428	metY	metY-rimP-nusA-infB-rbfA-truB-rpsO-pnp	metY	metYp2	Sigma70
8	ECK120009739	metY-rimP-nusA-infB-rbfA-truB-rpsO-pnp	metY-rimP-nusA-infB-rbfA-truB-rpsO-pnp	metY,rimP,nusA,infB,rbfA,truB,rpsO,pnp	metYp2	Sigma70
3	ECK120009678	metZWV	metZWV	metZ,metW,metV	metZp	Sigma70
1	ECK120010905	mfd	mfd	mfd	mfdp1	Sigma70
1	ECK120010906	mfd	mfd	mfd	mfdp2	Sigma70
2	ECK120015343	mglAC	mglBAC	mglA,mglC	mglAp	Sigma70
3	ECK120009359	mglBAC	mglBAC	mglB,mglA,mglC	mglBp	Sigma70
1	ECK120008976	mgrB	mgrB	mgrB	mgrBp
1	ECK125108716	mgrR	mgrR	mgrR	mgrRp	Sigma70
1	ECK120026806	mgsA	mgsA	mgsA	mgsAp
2	ECK120011122	mgtLA	mgtLA	mgtL,mgtA	mgtAp1	Sigma70
2	ECK120010908	mgtLA	mgtLA	mgtL,mgtA	mgtAp2	Sigma70
6	ECK120008972	mhpABCDFE	mhpABCDFE	mhpA,mhpB,mhpC,mhpD,mhpF,mhpE	mhpAp	Sigma70
2	ECK120010907	mhpR-lacI	mhpR-lacI	mhpR,lacI	mhpRp	Sigma70
2	ECK125135064	mhpR-lacI	mhpR-lacI	mhpR,lacI	mhpRp1	Sigma70
1	ECK120026613	mhpT	mhpT	mhpT	mhpTp	Sigma32
5	ECK120033603	miaA-hfq-hflXKC	yjeF-tsaE-amiB-mutL-miaA-hfq-hflXKC	miaA,hfq,hflX,hflK,hflC	miaAp1	Sigma70
5	ECK120033602	miaA-hfq-hflXKC	yjeF-tsaE-amiB-mutL-miaA-hfq-hflXKC	miaA,hfq,hflX,hflK,hflC	miaAp2	Sigma32
1	ECK120020461	micA	micA	micA	micAp	Sigma24
1	ECK120021238	micC	micC	micC	micCp	Sigma70
1	ECK120008981	micF	micF	micF	micFp	Sigma70
1	ECK125165933	micL	micL	micL	micLp	Sigma24
1	ECK125199574	micL	micL	micL	micLp2
1	ECK120027706	mioC	asnC-mioC-mnmG-rsmG	mioC	mioCp
1	ECK120027095	mipA	mipA	mipA	mipAp
1	ECK120020481	mlaA	mlaA	mlaA	mlaAp
1	ECK120011165	mlc	mlc-ynfK	mlc	mlcp1	Sigma70
2	ECK120011166	mlc-ynfK	mlc-ynfK	mlc,ynfK	mlcp2	Sigma70
1	ECK120027217	mlrA	mlrA	mlrA	mlrAp	Sigma70
1	ECK120016181	mltF	mltF	mltF	mltFp	Sigma70
2	ECK120009027	mngAB	mngAB	mngA,mngB	mngAp	Sigma32
1	ECK120009594	mngR	mngR	mngR	mngRp	Sigma70
1	ECK120030187	mnmA	mnmA	mnmA	mnmAp
2	ECK120027705	mnmG-rsmG	asnC-mioC-mnmG-rsmG	mnmG,rsmG	mnmGp	Sigma38
1	ECK120015315	mntH	mntH	mntH	mntHp	Sigma70
1	ECK120027115	mntP	mntP	mntP	mntPp	Sigma70
2	ECK120026765	mntR-ybiR	mntR-ybiR	mntR,ybiR	mntRp
5	ECK120009488	moaABCDE	moaABCDE	moaA,moaB,moaC,moaD,moaE	moaAp1
5	ECK120008922	moaABCDE	moaABCDE	moaA,moaB,moaC,moaD,moaE	moaAp2
5	ECK120015178	moaBCDE	moaABCDE	moaB,moaC,moaD,moaE	moaBp
2	ECK120009730	mobAB	mobAB	mobA,mobB	mobAp1
2	ECK120009731	mobAB	mobAB	mobA,mobB	mobAp2
3	ECK120009489	modABC	modABC	modA,modB,modC	modAp	Sigma70
3	ECK120029602	modABC	modABC	modA,modB,modC	modAp1	Sigma28
2	ECK120009490	moeAB	moeAB	moeA,moeB	moeAp	Sigma70
1	ECK120015374	molR_1	molR_1	molR_1	molR_1p	Sigma70
4	ECK120009491	motAB-cheAW	motAB-cheAW	motA,motB,cheA,cheW	motAp	Sigma28
1	ECK120009192	mpl	mpl	mpl	mplp1	Sigma38
1	ECK120009193	mpl	mpl	mpl	mplp2	Sigma70
3	ECK120009642	mprA-emrAB	mprA-emrAB	mprA,emrA,emrB	mprAp	Sigma70
2	ECK120027513	mqsRA	mqsRA	mqsR,mqsA	mqsRp	Sigma70
2	ECK125095428	mqsRA	mqsRA	mqsR,mqsA	mqsRp2	Sigma70
15	ECK120033221	rsmH-ftsLI-murEF-mraY-murD-ftsW-murGC-ddlB-ftsQAZ-lpxC	mraZ-rsmH-ftsLI-murEF-mraY-murD-ftsW-murGC-ddlB-ftsQAZ-lpxC	rsmH,ftsL,ftsI,murE,murF,mraY,murD,ftsW,murG,murC,ddlB,ftsQ,ftsA,ftsZ,lpxC	mraWp1
16	ECK120009189	mraZ-rsmH-ftsLI-murEF-mraY-murD-ftsW-murGC-ddlB-ftsQAZ-lpxC	mraZ-rsmH-ftsLI-murEF-mraY-murD-ftsW-murGC-ddlB-ftsQAZ-lpxC	mraZ,rsmH,ftsL,ftsI,murE,murF,mraY,murD,ftsW,murG,murC,ddlB,ftsQ,ftsA,ftsZ,lpxC	mraZp	Sigma70
1	ECK120021236	mrcA	mrcA	mrcA	mrcAp
1	ECK120026535	mrcB	mrcB	mrcB	mrcBp
1	ECK120030629	mreB	mreBCD	mreB	mreBp1	Sigma70
3	ECK120009492	mreBCD	mreBCD	mreB,mreC,mreD	mreBp1	Sigma70
1	ECK120030630	mreB	mreBCD	mreB	mreBp2
3	ECK120030627	mreBCD	mreBCD	mreB,mreC,mreD	mreBp2
1	ECK120030631	mreB	mreBCD	mreB	mreBp3	Sigma70
3	ECK120030628	mreBCD	mreBCD	mreB,mreC,mreD	mreBp3	Sigma70
2	ECK120033590	mreCD	mreBCD	mreC,mreD	mreCp
1	ECK120027208	mrp	mrp	mrp	mrpp	Sigma70
1	ECK120027587	mscL	mscL	mscL	mscLp
1	ECK120027483	mscS	mscS	mscS	mscSp
1	ECK120009725	msrA	msrA	msrA	msrAp
1	ECK125135744	msrB	msrB	msrB	msrBp6	Sigma70
1	ECK120015508	msyB	msyB	msyB	msyBp	Sigma38
3	ECK120009384	mtlADR	mtlADR	mtlA,mtlD,mtlR	mtlAp	Sigma70
3	ECK120026537	mtn-btuF-yadS	mtn-btuF-yadS	mtn,btuF,yadS	mtnp	Sigma70
1	ECK120029971	mtr	mtr	mtr	mtrp1
1	ECK120009286	mtr	mtr	mtr	mtrp2	Sigma70
2	ECK120035094	murQP	murQP-yfeW	murQ,murP	murQp1	Sigma70
2	ECK120035095	murQP	murQP-yfeW	murQ,murP	murQp2	Sigma70
1	ECK120027312	murR	murR	murR	murRp	Sigma70
6	ECK120033766	mutL-miaA-hfq-hflXKC	yjeF-tsaE-amiB-mutL-miaA-hfq-hflXKC	mutL,miaA,hfq,hflX,hflK,hflC	mutLp1	Sigma70
6	ECK120033765	mutL-miaA-hfq-hflXKC	yjeF-tsaE-amiB-mutL-miaA-hfq-hflXKC	mutL,miaA,hfq,hflX,hflK,hflC	mutLp2	Sigma32
1	ECK120009087	mutM	yicR-rpmBG-mutM	mutM	mutMp	Sigma32
1	ECK120009818	mutS	mutS	mutS	mutSp	Sigma38
2	ECK120009092	mutY-yggX	mutY-yggX-mltC-nupG	mutY,yggX	mutYp1
3	ECK120009093	mutY-yggX-mltC	mutY-yggX-mltC-nupG	mutY,yggX,mltC	mutYp1
4	ECK120009089	mutY-yggX-mltC-nupG	mutY-yggX-mltC-nupG	mutY,yggX,mltC,nupG	mutYp1
2	ECK120009101	mutY-yggX	mutY-yggX-mltC-nupG	mutY,yggX	mutYp2
3	ECK120009102	mutY-yggX-mltC	mutY-yggX-mltC-nupG	mutY,yggX,mltC	mutYp2
4	ECK120009090	mutY-yggX-mltC-nupG	mutY-yggX-mltC-nupG	mutY,yggX,mltC,nupG	mutYp2
1	ECK120009806	nac	nac	nac	nacp	Sigma54
2	ECK120026745	nadA-pnuC	nadA-pnuC	nadA,pnuC	nadAp
1	ECK120009385	nadB	nadB	nadB	nadBp	Sigma70
1	ECK120026529	nadC	nadC	nadC	nadCp
1	ECK120027082	nadE	nadE	nadE	nadEp	Sigma70
1	ECK120015490	nagA	nagBAC-umpH	nagA	nagAp
4	ECK120009236	nagBAC-umpH	nagBAC-umpH	nagB,nagA,nagC,umpH	nagBp	Sigma70
1	ECK120033740	nagC	nagBAC-umpH	nagC	nagCp1	Sigma70
1	ECK120033741	nagC	nagBAC-umpH	nagC	nagCp2	Sigma70
1	ECK120009023	nagE	nagE	nagE	nagEp	Sigma70
1	ECK125162169	nanA	nanATEK-yhcH	nanA	nanAp	Sigma70
5	ECK120008953	nanATEK-yhcH	nanATEK-yhcH	nanA,nanT,nanE,nanK,yhcH	nanAp	Sigma70
2	ECK120010982	nanCM	nanCMS	nanC,nanM	nanCp
3	ECK125162170	nanCMS	nanCMS	nanC,nanM,nanS	nanCp
15	ECK120009493	napFDAGHBC-ccmABCDEFGH	napFDAGHBC-ccmABCDEFGH	napF,napD,napA,napG,napH,napB,napC,ccmA,ccmB,ccmC,ccmD,ccmE,ccmF,ccmG,ccmH	napFp1	Sigma70
15	ECK120009754	napFDAGHBC-ccmABCDEFGH	napFDAGHBC-ccmABCDEFGH	napF,napD,napA,napG,napH,napB,napC,ccmA,ccmB,ccmC,ccmD,ccmE,ccmF,ccmG,ccmH	napFp2	Sigma70
7	ECK120020537	napFDAGHBC	napFDAGHBC-ccmABCDEFGH	napF,napD,napA,napG,napH,napB,napC	napFp3
4	ECK120009237	narGHJI	narGHJI	narG,narH,narJ,narI	narGp	Sigma70
1	ECK120009238	narK	narK	narK	narKp1	Sigma70
1	ECK120015958	narK	narK	narK	narKp2	Sigma70
1	ECK120021233	narP	narP	narP	narPp	Sigma32
1	ECK120029323	narQ	narQ	narQ	narQp
1	ECK120010910	narU	narU	narU	narUp1	Sigma70
1	ECK120010911	narU	narU	narU	narUp2	Sigma38
2	ECK120016726	narWV	narZYWV	narW,narV	narWp	Sigma24
2	ECK120009347	narXL	narXL	narX,narL	narXp	Sigma70
1	ECK120009349	ndh	ndh	ndh	ndhp	Sigma70
2	ECK120034933	nemRA	nemRA-gloA	nemR,nemA	nemRp	Sigma70
3	ECK125160645	nemRA-gloA	nemRA-gloA	nemR,nemA,gloA	nemRp	Sigma70
1	ECK120027687	nepI	nepI	nepI	nepIp
1	ECK120009380	nfo	nfo	nfo	nfop	Sigma70
1	ECK120010963	nfsB	nfsB	nfsB	nfsBp	Sigma70
1	ECK120020535	nfuA	gntX-nfuA	nfuA	nfuAp1
1	ECK120033565	nfuA	gntX-nfuA	nfuA	nfuAp2	Sigma32
2	ECK120009391	nhaAR	nhaAR	nhaA,nhaR	nhaAp1	Sigma70
2	ECK120009006	nhaAR	nhaAR	nhaA,nhaR	nhaAp2	Sigma38
6	ECK120009496	nikABCDER	nikABCDER	nikA,nikB,nikC,nikD,nikE,nikR	nikAp1
6	ECK125095425	nikABCDER	nikABCDER	nikA,nikB,nikC,nikD,nikE,nikR	nikAp2	Sigma54
1	ECK120011159	nikR	nikABCDER	nikR	nikRp
1	ECK120021137	nimR	nimR	nimR	nimRp
1	ECK120027099	nimT	nimT	nimT	nimTp
4	ECK120009239	nirBDC-cysG	nirBDC-cysG	nirB,nirD,nirC,cysG	nirBp	Sigma70
1	ECK120021231	nlpA	nlpA	nlpA	nlpAp
2	ECK120009497	nlpD-rpoS	nlpD-rpoS	nlpD,rpoS	nlpDp1	Sigma70
2	ECK120009625	nlpD-rpoS	nlpD-rpoS	nlpD,rpoS	nlpDp2	Sigma70
1	ECK120009749	nmpC	nmpC	nmpC	nmpCp
3	ECK120015475	nohA-ydfN-tfaQ	nohA-ydfN-tfaQ	nohA,ydfN,tfaQ	nohAp	Sigma70
1	ECK120029470	norR	norR	norR	norRp
2	ECK120009024	norVW	norVW	norV,norW	norVp	Sigma54
3	ECK120009240	nrdAB-yfaE	nrdAB-yfaE	nrdA,nrdB,yfaE	nrdAp	Sigma70
2	ECK120009049	nrdDG	nrdDG	nrdD,nrdG	nrdDp	Sigma70
1	ECK120033575	nrdG	nrdDG	nrdG	nrdGp
4	ECK120008916	nrdHIEF	nrdHIEF	nrdH,nrdI,nrdE,nrdF	nrdHp	Sigma70
6	ECK120026634	nrdR-ribDE-nusB-thiL-pgpA	nrdR-ribDE-nusB-thiL-pgpA	nrdR,ribD,ribE,nusB,thiL,pgpA	nrdRp	Sigma70
7	ECK120009390	nrfABCDEFG	nrfABCDEFG	nrfA,nrfB,nrfC,nrfD,nrfE,nrfF,nrfG	nrfAp	Sigma70
4	ECK120020448	nsrR-rnr-rlmB-yjfI	nsrR-rnr-rlmB-yjfIJ	nsrR,rnr,rlmB,yjfI	nsrRp
3	ECK120015360	nudB-yebC-ruvC	nudB-yebC-ruvC	nudB,yebC,ruvC	nudBp	Sigma70
13	ECK120009632	nuoABCEFGHIJKLMN	nuoABCEFGHIJKLMN	nuoA,nuoB,nuoC,nuoE,nuoF,nuoG,nuoH,nuoI,nuoJ,nuoK,nuoL,nuoM,nuoN	nuoAp1
13	ECK120009498	nuoABCEFGHIJKLMN	nuoABCEFGHIJKLMN	nuoA,nuoB,nuoC,nuoE,nuoF,nuoG,nuoH,nuoI,nuoJ,nuoK,nuoL,nuoM,nuoN	nuoAp2	Sigma70
2	ECK120033589	nuoMN	nuoABCEFGHIJKLMN	nuoM,nuoN	nuoMp
1	ECK120009338	nupC	nupC	nupC	nupCp	Sigma70
1	ECK120009321	nupG	mutY-yggX-mltC-nupG	nupG	nupGp	Sigma70
1	ECK125095214	ogt	abgABT-ogt	ogt	ogtp
1	ECK120032964	ohsC	ohsC	ohsC	ohsCp	Sigma70
1	ECK120009241	ompA	ompA	ompA	ompAp1	Sigma70
1	ECK120009046	ompA	ompA	ompA	ompAp2
1	ECK120009242	ompC	ompC	ompC	ompCp1	Sigma70
1	ECK120009658	ompC	ompC	ompC	ompCp2
1	ECK120009659	ompC	ompC	ompC	ompCp3
1	ECK120009243	ompF	ompF	ompF	ompFp	Sigma38
2	ECK120009717	ompR-envZ	ompR-envZ	ompR,envZ	ompRp1	Sigma70
2	ECK120009368	ompR-envZ	ompR-envZ	ompR,envZ	ompRp2	Sigma70
2	ECK120009718	ompR-envZ	ompR-envZ	ompR,envZ	ompRp3	Sigma70
2	ECK120009719	ompR-envZ	ompR-envZ	ompR,envZ	ompRp4	Sigma70
1	ECK120015493	ompT	envY-ompT	ompT	ompTp
1	ECK120021227	ompW	ompW	ompW	ompWp
1	ECK120034934	ompX	ompX	ompX	ompXp1	Sigma70
1	ECK120021226	ompX	ompX	ompX	ompXp2
1	ECK120021186	omrA	omrA	omrA	omrAp
1	ECK120021185	omrB	omrB	omrB	omrBp
5	ECK120009412	oppABCDF	oppABCDF	oppA,oppB,oppC,oppD,oppF	oppAp	Sigma28
1	ECK120009575	osmB	osmB	osmB	osmBp1	Sigma38
1	ECK120009576	osmB	osmB	osmB	osmBp2	Sigma70
1	ECK120011099	osmC	osmC	osmC	osmCp1	Sigma70
1	ECK120011100	osmC	osmC	osmC	osmCp2	Sigma38
1	ECK120009584	osmE	osmE	osmE	osmEp	Sigma70
4	ECK120009081	osmF-yehYXW	osmF-yehYXW	osmF,yehY,yehX,yehW	osmFp	Sigma38
4	ECK120033601	osmF-yehYXW	osmF-yehYXW	osmF,yehY,yehX,yehW	osmFp2
1	ECK120008964	osmY	osmY	osmY	osmYp	Sigma70
1	ECK120009578	otsA	otsBA	otsA	otsAp	Sigma38
2	ECK120009500	otsBA	otsBA	otsB,otsA	otsBp	Sigma38
2	ECK120015333	otsBA	otsBA	otsB,otsA	otsBp2	Sigma38
1	ECK120009244	oxyR	oxyR	oxyR	oxyRp	Sigma38
1	ECK120020431	oxyS	oxyS	oxyS	oxySp	Sigma70
11	ECK120009778	paaABCDEFGHIJK	paaABCDEFGHIJK	paaA,paaB,paaC,paaD,paaE,paaF,paaG,paaH,paaI,paaJ,paaK	paaAp	Sigma70
2	ECK120009813	paaXY	paaXY	paaX,paaY	paaXp	Sigma70
1	ECK120009758	paaZ	paaZ	paaZ	paaZp
1	ECK120011079	pabA	yhfG-fic-pabA	pabA	pabAp1	Sigma70
1	ECK120015338	pagP	pagP	pagP	pagPp
2	ECK120009501	panBC	panBC	panB,panC	panBp	Sigma70
1	ECK120020432	panD	panD	panD	panDp
1	ECK125203405	panD	panD	panD	panDp2	Sigma70
1	ECK120010920	patA	patA	patA	patAp	Sigma38
1	ECK120009333	pck	pck	pck	pckp	Sigma70
2	ECK120016332	pcnB-folK	pcnB-folK	pcnB,folK	pcnBp1	Sigma70
2	ECK120016333	pcnB-folK	pcnB-folK	pcnB,folK	pcnBp2	Sigma70
2	ECK120009503	pcnB-folK	pcnB-folK	pcnB,folK	pcnBp3	Sigma70
2	ECK125122031	pcnB-folK	pcnB-folK	pcnB,folK	pcnBp4	Sigma38
4	ECK120009703	pdhR-aceEF-lpd	pdhR-aceEF-lpd	pdhR,aceE,aceF,lpd	pdhRp	Sigma70
2	ECK120009078	pdxA-rsmA	lptD-surA-pdxA-rsmA-apaGH	pdxA,rsmA	pdxAp
4	ECK120009076	pdxA-rsmA-apaGH	lptD-surA-pdxA-rsmA-apaGH	pdxA,rsmA,apaG,apaH	pdxAp
4	ECK120009072	pdxB-usg-truA-dedA	pdxB-usg-truA-dedA	pdxB,usg,truA,dedA	pdxBp
3	ECK120026297	pdxH-tyrS-pdxY	pdxH-tyrS-pdxY	pdxH,tyrS,pdxY	pdxHp
2	ECK120009772	pdxJ-acpS	rnc-era-recO-pdxJ-acpS	pdxJ,acpS	pdxJp
1	ECK120020433	pdxK	pdxK	pdxK	pdxKp1
1	ECK120033573	pdxY	pdxH-tyrS-pdxY	pdxY	pdxYp
1	ECK120027846	pepA	pepA	pepA	pepAp1	Sigma70
1	ECK120049208	pepA	pepA	pepA	pepAp2	Sigma70
1	ECK120049209	pepA	pepA	pepA	pepAp3	Sigma70
1	ECK120011053	pepD	pepD	pepD	pepDp1
1	ECK120009125	pepD	pepD	pepD	pepDp2
1	ECK120026304	pepD	pepD	pepD	pepDp3	Sigma70
1	ECK120020435	pepN	pepN	pepN	pepNp
4	ECK120027731	pepQ-yigZ-trkH-hemG	pepQ-yigZ-trkH-hemG	pepQ,yigZ,trkH,hemG	pepQp
1	ECK120020436	pepT	pepT	pepT	pepTp
1	ECK125109839	pfkA	pfkA	pfkA	pfkAp1	Sigma70
1	ECK120011164	pfkA	pfkA	pfkA	pfkAp2	Sigma70
1	ECK120011065	pfkB	pfkB	pfkB	pfkBp1	Sigma38
1	ECK120015357	pfkB	pfkB	pfkB	pfkBp2	Sigma38
1	ECK120026789	pflA	pflA	pflA	pflAp	Sigma70
1	ECK120009567	pflB	focA-pflB	pflB	pflBp1
1	ECK120009568	pflB	focA-pflB	pflB	pflBp2
1	ECK120009569	pflB	focA-pflB	pflB	pflBp3
1	ECK120009570	pflB	focA-pflB	pflB	pflBp4
1	ECK120009571	pflB	focA-pflB	pflB	pflBp5
4	ECK120017000	pgaABCD	pgaABCD	pgaA,pgaB,pgaC,pgaD	pgaAp
1	ECK120011126	pgi	pgi	pgi	pgip	Sigma70
1	ECK120015349	pgk	epd-pgk-fbaA	pgk	pgkp1	Sigma70
2	ECK120015347	pgk-fbaA	epd-pgk-fbaA	pgk,fbaA	pgkp1	Sigma70
1	ECK125109840	pgk	epd-pgk-fbaA	pgk	pgkp2
2	ECK125109841	pgk-fbaA	epd-pgk-fbaA	pgk,fbaA	pgkp2
1	ECK125109842	pgk	epd-pgk-fbaA	pgk	pgkp3	Sigma70
2	ECK125109843	pgk-fbaA	epd-pgk-fbaA	pgk,fbaA	pgkp3	Sigma70
1	ECK120026903	pgpB	pgpB	pgpB	pgpBp	Sigma70
2	ECK120027352	pgpC-tadA	pgpC-tadA	pgpC,tadA	pgpCp	Sigma32
1	ECK120029318	pgsA	pgsA	pgsA	pgsAp
2	ECK120009159	pheLA	pheLA	pheL,pheA	pheLp	Sigma70
1	ECK120021265	pheM	thrS-infC-rpmI-rplT-pheMST-ihfA	pheM	pheMp
4	ECK120011063	pheMST-ihfA	thrS-infC-rpmI-rplT-pheMST-ihfA	pheM,pheS,pheT,ihfA	pheMp
1	ECK120015355	pheP	pheP	pheP	phePp	Sigma70
1	ECK120009701	pheU	pheU	pheU	pheUp	Sigma70
1	ECK120009683	pheV	pheV	pheV	pheVp	Sigma70
15	ECK120009392	phnCDE_1E_2FGHIJKLMNOP	phnCDE_1E_2FGHIJKLMNOP	phnC,phnD,phnE_1,phnE_2,phnF,phnG,phnH,phnI,phnJ,phnK,phnL,phnM,phnN,phnO,phnP	phnCp	Sigma70
5	ECK120033761	phnLMNOP	phnCDE_1E_2FGHIJKLMNOP	phnL,phnM,phnN,phnO,phnP	phnLp
2	ECK120009245	phoA-psiF	phoA-psiF	phoA,psiF	phoAp	Sigma70
2	ECK120009246	phoBR	phoBR	phoB,phoR	phoBp	Sigma70
1	ECK120009279	phoE	phoE	phoE	phoEp	Sigma70
1	ECK120009832	phoH	phoH	phoH	phoHp1	Sigma70
1	ECK120009833	phoH	phoH	phoH	phoHp2
2	ECK120009507	phoPQ	phoPQ	phoP,phoQ	phoPp1
2	ECK120009807	phoPQ	phoPQ	phoP,phoQ	phoPp2
2	ECK120033557	phoPQ	phoPQ	phoP,phoQ	phoPp3	Sigma32
1	ECK125135568	phoQ	phoPQ	phoQ	phoQp5	Sigma24
1	ECK125134712	phoU	pstSCAB-phoU	phoU	phoUp	Sigma70
1	ECK120009755	phr	ybgA-phr	phr	phrBp
1	ECK120020437	pitA	pitA	pitA	pitAp
1	ECK120027500	pitB	pitB	pitB	pitBp	Sigma70
1	ECK125140834	patZ	yfiP-patZ	patZ	pkap	Sigma70
1	ECK120027722	pldA	pldA	pldA	pldAp	Sigma70
1	ECK120016695	plsB	plsB	plsB	plsBp	Sigma24
1	ECK125135011	plsB	plsB	plsB	plsBp2
4	ECK120015313	plsX-fabHDG	yceD-rpmF-plsX-fabHDG-acpP-fabF	plsX,fabH,fabD,fabG	plsXp	Sigma70
1	ECK120027838	pmbA	pmbA	pmbA	pmbAp
1	ECK120009386	pncB	pncB	pncB	pncBp	Sigma70
1	ECK120027402	pncC	pncC	pncC	pncCp	Sigma32
1	ECK120009160	pnp	metY-rimP-nusA-infB-rbfA-truB-rpsO-pnp	pnp	pnpp	Sigma70
2	ECK120009508	pntAB	pntAB	pntA,pntB	pntAp	Sigma70
1	ECK120011157	polA	polA	polA	polAp
1	ECK120015327	polB	polB	polB	polBp	Sigma70
4	ECK120009510	potFGHI	potFGHI	potF,potG,potH,potI	potFp1	Sigma54
4	ECK120033243	potFGHI	potFGHI	potF,potG,potH,potI	potFp2
1	ECK120011153	poxB	poxB-ltaE-ybjT	poxB	poxBp	Sigma38
1	ECK120020438	ppa	ppa	ppa	ppap
1	ECK120011089	ppc	ppc	ppc	ppcp
5	ECK120027429	ppdAB-ygdB-ppdC-recC	ppdAB-ygdB-ppdC-recC	ppdA,ppdB,ygdB,ppdC,recC	ppdAp	Sigma28
3	ECK120026528	ppdD-hofBC	ppdD-hofBC	ppdD,hofB,hofC	ppdDp	Sigma70
1	ECK120010929	pphA	pphA	pphA	pphAp	Sigma32
1	ECK120009645	ppiA	ppiA	ppiA	ppiAp1	Sigma70
1	ECK120009646	ppiA	ppiA	ppiA	ppiAp2	Sigma70
1	ECK120009647	ppiA	ppiA	ppiA	ppiAp3	Sigma70
1	ECK120009648	ppiA	ppiA	ppiA	ppiAp4	Sigma70
1	ECK120027710	ppiC	ppiC	ppiC	ppiCp
1	ECK120011115	ppiD	ppiD	ppiD	ppiDp1	Sigma32
1	ECK120011116	ppiD	ppiD	ppiD	ppiDp2	Sigma70
2	ECK125136338	ppk-ppx	ppk-ppx	ppk,ppx	ppkp	Sigma38
1	ECK120009353	ppsA	ppsA	ppsA	ppsp	Sigma70
2	ECK120009790	pqiAB	pqiAB	pqiA,pqiB	pqiAp1	Sigma70
2	ECK120009791	pqiAB	pqiAB	pqiA,pqiB	pqiAp2	Sigma70
1	ECK120027598	prkB	prkB	prkB	prkBp
2	ECK120027634	prlC-rsmJ	prlC-rsmJ	prlC,rsmJ	prlCp	Sigma32
1	ECK120020439	proC	proC	proC	proCp
1	ECK120009700	proK	proK	proK	proKp	Sigma70
1	ECK120009676	proL	proL	proL	proLp	Sigma70
1	ECK120009346	proP	proP	proP	proPp1	Sigma70
1	ECK120009007	proP	proP	proP	proPp2	Sigma38
1	ECK120011052	proS	proS	proS	proSp	Sigma70
3	ECK120009814	proVWX	proVWX	proV,proW,proX	proVp1	Sigma70
3	ECK120009816	proVWX	proVWX	proV,proW,proX	proVp2	Sigma70
3	ECK120009815	proVWX	proVWX	proV,proW,proX	proVp3	Sigma70
4	ECK120010936	prpBCDE	prpBCDE	prpB,prpC,prpD,prpE	prpBp	Sigma54
1	ECK120015177	prpR	prpR	prpR	prpRp	Sigma70
1	ECK120009394	prs	lolB-ispE-prs	prs	prsp	Sigma70
2	ECK120010927	psd-mscM	psd-mscM	psd,mscM	psdp	Sigma24
1	ECK120010903	psiE	psiE	psiE	psiEp	Sigma70
5	ECK120009514	pspABCDE	pspABCDE	pspA,pspB,pspC,pspD,pspE	pspAp	Sigma54
4	ECK120033598	pspBCDE	pspABCDE	pspB,pspC,pspD,pspE	pspBp
1	ECK120033747	pspE	pspABCDE	pspE	pspEp
1	ECK120010897	pspF	pspF	pspF	pspFp1	Sigma70
1	ECK120010898	pspF	pspF	pspF	pspFp2	Sigma70
1	ECK120010899	pspF	pspF	pspF	pspFp3	Sigma70
1	ECK120009099	pspG	pspG	pspG	pspGp	Sigma54
1	ECK120030159	sraB	sraB	sraB	psrDp
1	ECK120020462	psrO	psrO	psrO	psrOp
2	ECK120035086	pstB-phoU	pstSCAB-phoU	pstB,phoU	pstBp	Sigma70
2	ECK125134710	pstB-phoU	pstSCAB-phoU	pstB,phoU	pstBp1	Sigma70
4	ECK125134708	pstCAB-phoU	pstSCAB-phoU	pstC,pstA,pstB,phoU	pstCp	Sigma70
1	ECK120035084	pstS	pstSCAB-phoU	pstS	pstSp	Sigma70
3	ECK120035085	pstSCA	pstSCAB-phoU	pstS,pstC,pstA	pstSp	Sigma70
5	ECK120009393	pstSCAB-phoU	pstSCAB-phoU	pstS,pstC,pstA,pstB,phoU	pstSp	Sigma70
2	ECK120008956	pth-ychF	pth-ychF	pth,ychF	pthp	Sigma70
1	ECK120009165	ptrA	ptrA-recBD	ptrA	ptrAp	Sigma70
3	ECK120027428	ptrA-recBD	ptrA-recBD	ptrA,recB,recD	ptrAp	Sigma70
1	ECK120027129	ptrB	ptrB	ptrB	ptrBp
1	ECK120008923	ptsG	ptsG	ptsG	ptsGp1
1	ECK120008924	ptsG	ptsG	ptsG	ptsGp2	Sigma70
3	ECK120009665	ptsHI-crr	ptsHI-crr	ptsH,ptsI,crr	ptsHp1
3	ECK120009664	ptsHI-crr	ptsHI-crr	ptsH,ptsI,crr	ptsHp2	Sigma70
3	ECK120009663	ptsHI-crr	ptsHI-crr	ptsH,ptsI,crr	ptsHp3
3	ECK120009661	ptsHI-crr	ptsHI-crr	ptsH,ptsI,crr	ptsHp4	Sigma70
3	ECK120009662	ptsHI-crr	ptsHI-crr	ptsH,ptsI,crr	ptsHp5
1	ECK120009287	purA	purA	purA	purAp	Sigma70
1	ECK120009248	purC	purC	purC	purCp	Sigma70
2	ECK120009275	purEK	purEK	purE,purK	purEp	Sigma70
2	ECK120009249	purHD	purHD	purH,purD	purHp	Sigma70
1	ECK120009250	purL	purL	purL	purLp	Sigma70
2	ECK120009251	purMN	purMN	purM,purN	purMp	Sigma70
1	ECK120009252	purR	purR	purR	purRp	Sigma70
1	ECK120009748	putA	putA	putA	putAp	Sigma70
1	ECK120009710	putP	putP	putP	putPp1	Sigma70
1	ECK120009711	putP	putP	putP	putPp2
1	ECK120009712	putP	putP	putP	putPp3
1	ECK120009713	putP	putP	putP	putPp4	Sigma70
1	ECK120009714	putP	putP	putP	putPp5
2	ECK120029310	puuAP	puuAP	puuA,puuP	puuAp	Sigma38
3	ECK120026914	puuCBE	puuDRCBE	puuC,puuB,puuE	puuCp	Sigma38
2	ECK120026913	puuDRCBE	puuDRCBE	puuD,puuR,puuC,puuB,puuE	puuDp	Sigma38
1	ECK120010960	puuP	puuAP	puuP	puuPp	Sigma54
1	ECK120027134	pykA	pykA	pykA	pykAp1	Sigma70
1	ECK120034142	pykA	pykA	pykA	pykAp2	Sigma70
1	ECK120009707	pykF	pykF	pykF	pykFp	Sigma70
1	ECK120034139	pykF	pykF	pykF	pykFp1	Sigma70
1	ECK120034140	pykF	pykF	pykF	pykFp2	Sigma38
1	ECK125109846	pykF	pykF	pykF	pykFp3
1	ECK120009253	pyrC	pyrC	pyrC	pyrCp	Sigma70
1	ECK120009254	pyrD	pyrD	pyrD	pyrDp	Sigma70
2	ECK120011060	pyrF-yciH	lapAB-pyrF-yciH	pyrF,yciH	pyrFp	Sigma70
2	ECK120034163	pyrG-eno	pyrG-eno	pyrG,eno	pyrGp
2	ECK120011075	pyrG-eno	pyrG-eno	pyrG,eno	pyrGp1
2	ECK120011074	pyrG-eno	pyrG-eno	pyrG,eno	pyrGp2
1	ECK120010878	pyrH	pyrH	pyrH	pyrHp	Sigma70
3	ECK120009667	pyrLBI	pyrLBI	pyrL,pyrB,pyrI	pyrLp1
3	ECK120009666	pyrLBI	pyrLBI	pyrL,pyrB,pyrI	pyrLp2
2	ECK120026666	qmcA-ybbJ	qmcA-ybbJ	qmcA,ybbJ	qmcAp
1	ECK120029339	qor	qor	qor	qorp
2	ECK120016558	qseBC	qseBC	qseB,qseC	qseBp1	Sigma70
2	ECK120016552	qseBC	qseBC	qseB,qseC	qseBp2	Sigma70
1	ECK120011055	queA	queA	queA	queAp
1	ECK120027422	queF	queF	queF	queFp
1	ECK120021041	queG	queG	queG	queGp
1	ECK120027362	raiA	raiA	raiA	raiAp	Sigma32
1	ECK125165389	ralA	ralA	ralA	ralAp
2	ECK120027707	ravA-viaA	ravA-viaA	ravA,viaA	ravAp
6	ECK120009397	rbsDACBKR	rbsDACBKR	rbsD,rbsA,rbsC,rbsB,rbsK,rbsR	rbsDp	Sigma70
2	ECK120027204	rcnAB	rcnAB	rcnA,rcnB	rcnAp	Sigma70
1	ECK120027203	rcnR	rcnR	rcnR	rcnRp	Sigma70
1	ECK120009668	rcsA	rcsA	rcsA	rcsAp	Sigma70
1	ECK120009515	rcsB	rcsDB	rcsB	rcsBp1	Sigma70
1	ECK125109850	rcsB	rcsDB	rcsB	rcsBp2	Sigma70
2	ECK120030184	rcsDB	rcsDB	rcsD,rcsB	rcsDp	Sigma70
2	ECK120033571	rdgB-yggW	yggSTU-rdgB-yggW	rdgB,yggW	rdgBp	Sigma32
1	ECK120027650	rdlD	rdlD	rdlD	rdlDp	Sigma70
2	ECK120008918	rdoA-dsbA	rdoA-dsbA	rdoA,dsbA	rdoAp	Sigma70
1	ECK120009255	recA	recAX	recA	recAp	Sigma70
2	ECK120009035	recAX	recAX	recA,recX	recAp	Sigma70
1	ECK120016589	recC	ppdAB-ygdB-ppdC-recC	recC	recCp	Sigma70
1	ECK120011082	recF	dnaAN-recF	recF	recFp1
1	ECK120011083	recF	dnaAN-recF	recF	recFp2
1	ECK120015766	recN	recN	recN	recNp	Sigma70
3	ECK120009782	relA-mazEF	relA-mazEFG	relA,mazE,mazF	relAp1	Sigma70
3	ECK120029515	relA-mazEF	relA-mazEFG	relA,mazE,mazF	relAp2	Sigma70
1	ECK125199572	relA	relA-mazEFG	relA	relAp3	Sigma54
1	ECK125199573	relA	relA-mazEFG	relA	relAp4	Sigma54
3	ECK120030202	relBE-hokD	relBE-hokD	relB,relE,hokD	relBp	Sigma70
1	ECK120009133	rep	rep	rep	repp	Sigma70
4	ECK120009015	rfaD-waaFCL	rfaD-waaFCL	rfaD,waaF,waaC,waaL	rfaDp1	Sigma70
4	ECK120009016	rfaD-waaFCL	rfaD-waaFCL	rfaD,waaF,waaC,waaL	rfaDp2
4	ECK120009517	rfaD-waaFCL	rfaD-waaFCL	rfaD,waaF,waaC,waaL	rfaDp3	Sigma32
4	ECK120009017	rfaD-waaFCL	rfaD-waaFCL	rfaD,waaF,waaC,waaL	rfaDp4	Sigma24
10	ECK120015151	waaQGPSBOJYZU	waaQGPSBOJYZU	waaQ,waaG,waaP,waaS,waaB,waaO,waaJ,waaY,waaZ,waaU	rfaQp2
2	ECK120049211	waaYZ	waaQGPSBOJYZU	waaY,waaZ	rfaYp	Sigma70
2	ECK120033585	waaZU	waaQGPSBOJYZU	waaZ,waaU	rfaZp
3	ECK120033583	rfbACX	rfbBDACX	rfbA,rfbC,rfbX	rfbAp
12	ECK120027715	rfe-wzzE-wecBC-rffGHCA-wzxE-rffT-wzyE-rffM	rfe-wzzE-wecBC-rffGHCA-wzxE-rffT-wzyE-rffM	rfe,wzzE,wecB,wecC,rffG,rffH,rffC,rffA,wzxE,rffT,wzyE,rffM	rfep	Sigma70
3	ECK120009409	rhaBAD	rhaBAD	rhaB,rhaA,rhaD	rhaBp	Sigma70
1	ECK125095459	rhaD	rhaBAD	rhaD	rhaDp	Sigma54
2	ECK120009256	rhaSR	rhaSR	rhaS,rhaR	rhaSp	Sigma70
1	ECK120009399	rhaT	rhaT	rhaT	rhaTp	Sigma70
1	ECK125158024	rhoL	rhoL-rho	rhoL	rhoLp
2	ECK120011086	rhoL-rho	rhoL-rho	rhoL,rho	rhoLp
1	ECK120011127	ribA	ribA	ribA	ribAp1	Sigma70
1	ECK120011137	ribA	ribA	ribA	ribAp2	Sigma70
2	ECK120027520	sroG-ribB	sroG-ribB	sroG,ribB	ribBp
4	ECK120033555	ribE-nusB-thiL-pgpA	nrdR-ribDE-nusB-thiL-pgpA	ribE,nusB,thiL,pgpA	ribEp	Sigma32
5	ECK120009479	ribF-ileS-lspA-fkpB-ispH	ribF-ileS-lspA-fkpB-ispH	ribF,ileS,lspA,fkpB,ispH	ribFp	Sigma70
1	ECK120027840	ridA	ridA	ridA	ridAp
1	ECK120011120	rihB	rihB	rihB	rihBp	Sigma70
1	ECK120015523	rimJ	rimJ	rimJ	rimJp
2	ECK120008968	rimK-ybjN	ybjC-nfsA-rimK-ybjN	rimK,ybjN	rimKp	Sigma70
1	ECK120009124	rimL	rimL	rimL	rimLp
1	ECK120021061	rimO	rimO	rimO	rimOp
3	ECK120009499	rimP-nusA-infB	metY-rimP-nusA-infB-rbfA-truB-rpsO-pnp	rimP,nusA,infB	rimPp	Sigma70
1	ECK120027419	rlmD	rlmD	rlmD	rlmDp
2	ECK120009466	rlmE-ftsH	rlmE-ftsH	rlmE,ftsH	rlmEp1	Sigma70
2	ECK120009599	rlmE-ftsH	rlmE-ftsH	rlmE,ftsH	rlmEp2	Sigma32
1	ECK120027635	rlmJ	rlmJ	rlmJ	rlmJp
2	ECK120008965	rlmL-uup	rlmL-uup	rlmL,uup	rlmLp
1	ECK125145759	rmf	rmf	rmf	rmfp
1	ECK120026705	rna	rna	rna	rnap
1	ECK120009795	rnb	rnb	rnb	rnbp1	Sigma70
1	ECK120009796	rnb	rnb	rnb	rnbp2	Sigma70
2	ECK120009520	rnc-era	rnc-era-recO-pdxJ-acpS	rnc,era	rncp	Sigma70
5	ECK120009771	rnc-era-recO-pdxJ-acpS	rnc-era-recO-pdxJ-acpS	rnc,era,recO,pdxJ,acpS	rncp	Sigma70
1	ECK120030180	rnd	rnd	rnd	rndp	Sigma70
1	ECK120016691	rne	rne	rne	rnep1	Sigma70
1	ECK120029516	rne	rne	rne	rnep2	Sigma70
1	ECK120029517	rne	rne	rne	rnep3	Sigma70
1	ECK120034131	rne	rne	rne	rnep4
1	ECK120009166	rnhA	rnhA	rnhA	rnhAp
1	ECK120033567	rnlA	rnlAB	rnlA	rnlAp	Sigma32
2	ECK120030154	rnlAB	rnlAB	rnlA,rnlB	rnlAp2	Sigma70
1	ECK120016728	rnlB	rnlAB	rnlB	rnlBp	Sigma24
1	ECK125109147	rnlB	rnlAB	rnlB	rnlBp2	Sigma70
1	ECK120009788	rnpB	garPLRK-rnpB	rnpB	rnpBp
1	ECK120015337	rob	rob	rob	robp
3	ECK120009841	rpe-gph-trpS	aroKB-damX-dam-rpe-gph-trpS	rpe,gph,trpS	rpep
1	ECK120035087	rph	rph-pyrE	rph	rphp1
2	ECK120009522	rph-pyrE	rph-pyrE	rph,pyrE	rphp1
1	ECK120015316	rpiA	rpiA	rpiA	rpiAp
1	ECK120009028	rpiB	rpiB	rpiB	rpiBp	Sigma70
4	ECK120009523	rplJL-rpoBC	rplKAJL-rpoBC	rplJ,rplL,rpoB,rpoC	rplJp
6	ECK120011093	rplKAJL-rpoBC	rplKAJL-rpoBC	rplK,rplA,rplJ,rplL,rpoB,rpoC	rplKp
1	ECK120016932	rplL	rplKAJL-rpoBC	rplL	rplLp
2	ECK120009524	rplM-rpsI	rplM-rpsI	rplM,rpsI	rplMp	Sigma70
12	ECK120009525	rplNXE-rpsNH-rplFR-rpsE-rpmD-rplO-secY-rpmJ	rplNXE-rpsNH-rplFR-rpsE-rpmD-rplO-secY-rpmJ	rplN,rplX,rplE,rpsN,rpsH,rplF,rplR,rpsE,rpmD,rplO,secY,rpmJ	rplNp
1	ECK120009161	rplT	thrS-infC-rpmI-rplT-pheMST-ihfA	rplT	rplTp
2	ECK120021264	rplT-pheM	thrS-infC-rpmI-rplT-pheMST-ihfA	rplT,pheM	rplTp
2	ECK120009526	rplU-rpmA	rplU-rpmA	rplU,rpmA	rplUp	Sigma70
1	ECK120027246	rplY	rplY	rplY	rplVp	Sigma70
2	ECK120009527	rpmBG	yicR-rpmBG-mutM	rpmB,rpmG	rpmBp
3	ECK120009088	rpmBG-mutM	yicR-rpmBG-mutM	rpmB,rpmG,mutM	rpmBp
1	ECK120020452	rpmE	rpmE	rpmE	rpmEp	Sigma32
5	ECK120015310	rpmF-plsX-fabHDG	yceD-rpmF-plsX-fabHDG-acpP-fabF	rpmF,plsX,fabH,fabD,fabG	rpmFp
2	ECK120009528	rpmH-rnpA	rpmH-rnpA	rpmH,rnpA	rpmHp1
2	ECK120009810	rpmH-rnpA	rpmH-rnpA	rpmH,rnpA	rpmHp2
2	ECK120009819	rpmH-rnpA	rpmH-rnpA	rpmH,rnpA	rpmHp3
2	ECK120029426	rpmI-rplT	thrS-infC-rpmI-rplT-pheMST-ihfA	rpmI,rplT	rpmIp	Sigma70
2	ECK120009179	rpoBC	rplKAJL-rpoBC	rpoB,rpoC	rpoBp
1	ECK120009621	rpoD	rpsU-dnaG-rpoD	rpoD	rpoDp1	Sigma70
1	ECK120009622	rpoD	rpsU-dnaG-rpoD	rpoD	rpoDp2	Sigma70
1	ECK120009623	rpoD	rpsU-dnaG-rpoD	rpoD	rpoDp3	Sigma32
1	ECK120033244	rpoD	rpsU-dnaG-rpoD	rpoD	rpoDp4	Sigma24
4	ECK120009733	rpoE-rseABC	rpoE-rseABC	rpoE,rseA,rseB,rseC	rpoEp1
4	ECK120009530	rpoE-rseABC	rpoE-rseABC	rpoE,rseA,rseB,rseC	rpoEp2	Sigma70
1	ECK120009611	rpoH	rpoH	rpoH	rpoHp1	Sigma70
1	ECK120009612	rpoH	rpoH	rpoH	rpoHp3	Sigma24
1	ECK120009277	rpoH	rpoH	rpoH	rpoHp4	Sigma70
1	ECK120009276	rpoH	rpoH	rpoH	rpoHp5	Sigma70
1	ECK120009724	rpoH	rpoH	rpoH	rpoHp6	Sigma54
5	ECK120009669	rpoN-hpf-ptsN-rapZ-npr	yrbG-kdsDC-lptCAB-rpoN-hpf-ptsN-rapZ-npr	rpoN,hpf,ptsN,rapZ,npr	rpoNp	Sigma70
1	ECK120009626	rpoS	nlpD-rpoS	rpoS	rpoSp	Sigma70
1	ECK120034158	rpoS	nlpD-rpoS	rpoS	rpoSp1
1	ECK120034159	rpoS	nlpD-rpoS	rpoS	rpoSp2
1	ECK120034160	rpoS	nlpD-rpoS	rpoS	rpoSp3
1	ECK120034161	rpoS	nlpD-rpoS	rpoS	rpoSp4
4	ECK120009532	rpoZ-spoT-trmH-recG	rpoZ-spoT-trmH-recG	rpoZ,spoT,trmH,recG	rpoZp	Sigma70
2	ECK120027430	rppH-ptsP	rppH-ptsP	rppH,ptsP	rppHp
1	ECK120027066	rprA	rprA	rprA	rprAp
2	ECK120009792	rpsA-ihfB	cmk-rpsA-ihfB	rpsA,ihfB	rpsAp1	Sigma70
2	ECK120009793	rpsA-ihfB	cmk-rpsA-ihfB	rpsA,ihfB	rpsAp3	Sigma70
3	ECK120009533	tff-rpsB-tsf	tff-rpsB-tsf	tff,rpsB,tsf	rpsBp	Sigma70
4	ECK120009534	rpsF-priB-rpsR-rplI	rpsF-priB-rpsR-rplI	rpsF,priB,rpsR,rplI	rpsFp	Sigma70
11	ECK120009535	rpsJ-rplCDWB-rpsS-rplV-rpsC-rplP-rpmC-rpsQ	rpsJ-rplCDWB-rpsS-rplV-rpsC-rplP-rpmC-rpsQ	rpsJ,rplC,rplD,rplW,rplB,rpsS,rplV,rpsC,rplP,rpmC,rpsQ	rpsJp	Sigma70
4	ECK120009536	rpsLG-fusA-tufA	rpsLG-fusA-tufA	rpsL,rpsG,fusA,tufA	rpsLp
5	ECK120034167	rpsMKD-rpoA-rplQ	rpsMKD-rpoA-rplQ	rpsM,rpsK,rpsD,rpoA,rplQ	rpsMp1
5	ECK120009537	rpsMKD-rpoA-rplQ	rpsMKD-rpoA-rplQ	rpsM,rpsK,rpsD,rpoA,rplQ	rpsMp2	Sigma70
1	ECK120020426	rpsO	metY-rimP-nusA-infB-rbfA-truB-rpsO-pnp	rpsO	rpsOp
2	ECK120009163	rpsO-pnp	metY-rimP-nusA-infB-rbfA-truB-rpsO-pnp	rpsO,pnp	rpsOp
4	ECK120009539	rpsP-rimM-trmD-rplS	rpsP-rimM-trmD-rplS	rpsP,rimM,trmD,rplS	rpsPp	Sigma70
1	ECK120015339	rpsT	rpsT	rpsT	rpsTp1
1	ECK120015340	rpsT	rpsT	rpsT	rpsTp2
1	ECK120009654	rpsU	rpsU-dnaG-rpoD	rpsU	rpsUp1	Sigma70
3	ECK120009540	rpsU-dnaG-rpoD	rpsU-dnaG-rpoD	rpsU,dnaG,rpoD	rpsUp1	Sigma70
3	ECK120009619	rpsU-dnaG-rpoD	rpsU-dnaG-rpoD	rpsU,dnaG,rpoD	rpsUp2	Sigma70
3	ECK120009620	rpsU-dnaG-rpoD	rpsU-dnaG-rpoD	rpsU,dnaG,rpoD	rpsUp3	Sigma70
1	ECK120029514	rraA	menA-rraA	rraA	rraAp	Sigma38
1	ECK125095422	rraB	rraB	rraB	rraBp1	Sigma70
1	ECK120021047	rraB	rraB	rraB	rraBp2
1	ECK120033748	rrfG	rrsG-gltW-rrlG-rrfG	rrfG	rrfGp
2	ECK120033591	rrlA-rrfA	rrsA-ileT-alaT-rrlA-rrfA	rrlA,rrfA	rrlAp
2	ECK120033586	rrlB-rrfB	rrsB-gltT-rrlB-rrfB	rrlB,rrfB	rrlBp
2	ECK120033588	rrlE-rrfE	rrsE-gltV-rrlE-rrfE	rrlE,rrfE	rrlEp
2	ECK120033584	rrlH-rrfH	rrsH-ileV-alaV-rrlH-rrfH	rrlH,rrfH	rrlHp
5	ECK120008927	rrsA-ileT-alaT-rrlA-rrfA	rrsA-ileT-alaT-rrlA-rrfA	rrsA,ileT,alaT,rrlA,rrfA	rrsAp1	Sigma32
5	ECK120033742	rrsA-ileT-alaT-rrlA-rrfA	rrsA-ileT-alaT-rrlA-rrfA	rrsA,ileT,alaT,rrlA,rrfA	rrsAp2	Sigma70
4	ECK120008928	rrsB-gltT-rrlB-rrfB	rrsB-gltT-rrlB-rrfB	rrsB,gltT,rrlB,rrfB	rrsBp1	Sigma32
4	ECK120008992	rrsB-gltT-rrlB-rrfB	rrsB-gltT-rrlB-rrfB	rrsB,gltT,rrlB,rrfB	rrsBp2	Sigma70
4	ECK120008929	rrsC-gltU-rrlC-rrfC	rrsC-gltU-rrlC-rrfC	rrsC,gltU,rrlC,rrfC	rrsCp1	Sigma32
4	ECK120008930	rrsC-gltU-rrlC-rrfC	rrsC-gltU-rrlC-rrfC	rrsC,gltU,rrlC,rrfC	rrsCp2	Sigma70
7	ECK120008936	rrsD-ileU-alaU-rrlD-rrfD-thrV-rrfF	rrsD-ileU-alaU-rrlD-rrfD-thrV-rrfF	rrsD,ileU,alaU,rrlD,rrfD,thrV,rrfF	rrsDp1	Sigma32
7	ECK120008937	rrsD-ileU-alaU-rrlD-rrfD-thrV-rrfF	rrsD-ileU-alaU-rrlD-rrfD-thrV-rrfF	rrsD,ileU,alaU,rrlD,rrfD,thrV,rrfF	rrsDp2	Sigma70
4	ECK120008931	rrsE-gltV-rrlE-rrfE	rrsE-gltV-rrlE-rrfE	rrsE,gltV,rrlE,rrfE	rrsEp	Sigma32
4	ECK120033743	rrsE-gltV-rrlE-rrfE	rrsE-gltV-rrlE-rrfE	rrsE,gltV,rrlE,rrfE	rrsEp2	Sigma70
4	ECK120008932	rrsG-gltW-rrlG-rrfG	rrsG-gltW-rrlG-rrfG	rrsG,gltW,rrlG,rrfG	rrsGp1	Sigma32
4	ECK120008933	rrsG-gltW-rrlG-rrfG	rrsG-gltW-rrlG-rrfG	rrsG,gltW,rrlG,rrfG	rrsGp2	Sigma70
5	ECK120008934	rrsH-ileV-alaV-rrlH-rrfH	rrsH-ileV-alaV-rrlH-rrfH	rrsH,ileV,alaV,rrlH,rrfH	rrsHp1	Sigma32
5	ECK120008935	rrsH-ileV-alaV-rrlH-rrfH	rrsH-ileV-alaV-rrlH-rrfH	rrsH,ileV,alaV,rrlH,rrfH	rrsHp2	Sigma70
1	ECK120011162	rsd	rsd	rsd	rsdp1	Sigma38
1	ECK120011163	rsd	rsd	rsd	rsdp2	Sigma70
3	ECK120009706	rseABC	rpoE-rseABC	rseA,rseB,rseC	rseAp3	Sigma24
1	ECK120010951	rseP	rseP	rseP	rsePp	Sigma24
1	ECK120030158	rseX	rseX	rseX	rseXp
5	ECK120026717	rsfS-rlmH-mrdAB-rlpA	rsfS-rlmH-mrdAB-rlpA	rsfS,rlmH,mrdA,mrdB,rlpA	rsfAp
3	ECK120009075	rsmA-apaGH	lptD-surA-pdxA-rsmA-apaGH	rsmA,apaG,apaH	rsmAp
2	ECK120016337	rssAB	rssAB	rssA,rssB	rssAp	Sigma38
1	ECK120016334	rssB	rssAB	rssB	rssBp	Sigma38
2	ECK120015486	rstAB	rstAB	rstA,rstB	rstAp
7	ECK120016931	rsxABCDGE-nth	ydgK-rsxABCDGE-nth	rsxA,rsxB,rsxC,rsxD,rsxG,rsxE,nth	rsxAp
2	ECK120009803	rtcBA	rtcBA	rtcB,rtcA	rtcBp	Sigma54
1	ECK120016219	rtcR	rtcR	rtcR	rtcRp
7	ECK120009002	rutABCDEFG	rutABCDEFG	rutA,rutB,rutC,rutD,rutE,rutF,rutG	rutAp	Sigma54
1	ECK120016696	rutR	rutR	rutR	rutRp	Sigma24
1	ECK120033594	rutR	rutR	rutR	rutRp2	Sigma70
2	ECK120009541	ruvAB	ruvAB	ruvA,ruvB	ruvAp1
2	ECK120009164	ruvAB	ruvAB	ruvA,ruvB	ruvAp2
1	ECK120015359	ruvC	nudB-yebC-ruvC	ruvC	ruvCp	Sigma70
2	ECK125140764	rybA-mntS	rybA-mntS	rybA,mntS	rybAp	Sigma70
1	ECK120026776	rybB	rybB	rybB	rybBp	Sigma24
1	ECK120030632	rydC	rydC	rydC	rydCp	Sigma70
1	ECK120020454	ryeA	ryeA	ryeA	ryeAp
1	ECK120027125	sdsR	sdsR	sdsR	ryeBp
1	ECK120032966	ryfD	ryfD	ryfD	ryfDp	Sigma70
1	ECK120010922	ryhB	ryhB	ryhB	ryhBp	Sigma70
1	ECK120020465	ryjA	ryjA	ryjA	ryjAp
1	ECK120032967	ryjB	ryjB	ryjB	ryjBp	Sigma70
2	ECK120033595	safA-ydeO	safA-ydeO	safA,ydeO	safAp	Sigma70
1	ECK120009134	sbcB	sbcB	sbcB	sbcBp
2	ECK120026630	sbcDC	sbcDC	sbcD,sbcC	sbcDp	Sigma70
2	ECK120010928	sbmA-yaiW	sbmA-yaiW	sbmA,yaiW	sbmAp	Sigma24
1	ECK120027177	sbmC	sbmC	sbmC	sbmCp1
1	ECK120034146	sbmC	sbmC	sbmC	sbmCp2
1	ECK120009413	sdaA	sdaA	sdaA	sdaAp	Sigma32
8	ECK120009705	sdhCDAB-sucABCD	sdhCDAB-sucABCD	sdhC,sdhD,sdhA,sdhB,sucA,sucB,sucC,sucD	sdhCp	Sigma70
3	ECK120009169	sdhDAB	sdhCDAB-sucABCD	sdhD,sdhA,sdhB	sdhDp2	Sigma70
1	ECK125140828	sdiA	sdiA	sdiA	sdiAp1	Sigma70
1	ECK125135788	sdiA	sdiA	sdiA	sdiAp2	Sigma70
1	ECK125140829	sdiA	sdiA	sdiA	sdiAp3	Sigma70
1	ECK125140830	sdiA	sdiA	sdiA	sdiAp4	Sigma70
2	ECK120027672	secB-gpsA	yibN-grxC-secB-gpsA	secB,gpsA	secBp	Sigma70
2	ECK120009542	secE-nusG	secE-nusG	secE,nusG	secEp
2	ECK120034112	secG-leuU	secG-leuU	secG,leuU	secGp1	Sigma70
2	ECK120034113	secG-leuU	secG-leuU	secG,leuU	secGp2	Sigma70
2	ECK120009543	selAB	selAB	selA,selB	selAp
1	ECK120027684	selC	selC	selC	selCp
2	ECK120033756	selD-topB	ydjA-selD-topB	selD,topB	selDp1
2	ECK125108938	selD-topB	ydjA-selD-topB	selD,topB	selDp2
2	ECK120010962	seqA-pgm	seqA-pgm	seqA,pgm	seqAp
1	ECK120009414	serA	serA	serA	serAp1	Sigma70
1	ECK120008971	serA	serA	serA	serAp2	Sigma70
2	ECK120011096	serB-radA	serB-radA-nadR	serB,radA	serBp
1	ECK120009107	serC	serC-aroA	serC	serCp	Sigma70
2	ECK120009545	serC-aroA	serC-aroA	serC,aroA	serCp	Sigma70
1	ECK125165387	serC	serC-aroA	serC	serCp2
1	ECK120026786	serS	serS	serS	serSp
1	ECK120009691	serT	serT	serT	serTp	Sigma70
1	ECK120009695	serU	serU	serU	serUp	Sigma70
5	ECK120009697	serV-argVYZQ	serV-argVYZQ	serV,argV,argY,argZ,argQ	serVp	Sigma70
1	ECK120009690	serW	serW	serW	serWp	Sigma70
1	ECK120009692	serX	serX	serX	serXp	Sigma70
2	ECK120009546	sfsA-dksA	sfsA-dksA-gluQ	sfsA,dksA	sfsAp	Sigma70
1	ECK120027565	sfsB	sfsB	sfsB	sfsBp
5	ECK120026522	sgrR-sroA-tbpA-thiPQ	sgrR-sroA-tbpA-thiPQ	sgrR,sroA,tbpA,thiP,thiQ	sgrRp	Sigma70
3	ECK120026523	sgrST-setA	sgrST-setA	sgrS,sgrT,setA	sgrSp	Sigma70
1	ECK125140835	shiA	shiA	shiA	shiAp	Sigma70
2	ECK120032965	shoB	shoB	shoB	shoBp
1	ECK120027192	sibA	sibA	sibA	sibAp	Sigma70
1	ECK120027193	sibB	sibB	sibB	sibBp	Sigma70
1	ECK120035097	sibC	sibC	sibC	sibCp
1	ECK120027526	sibD	sibD	sibD	sibDp	Sigma70
1	ECK120035096	sibE	sibE	sibE	sibEp	Sigma70
1	ECK120010932	sixA	sixA	sixA	sixAp	Sigma70
2	ECK120009289	slp-dctR	slp-dctR	slp,dctR	slpp	Sigma70
1	ECK120027897	slt	slt	slt	sltp7	Sigma32
1	ECK120015487	slyB	slyB	slyB	slyBp1
1	ECK120015488	slyB	slyB	slyB	slyBp2
1	ECK120015155	smf	smf	smf	smfp
4	ECK120009729	smtA-mukFEB	smtA-mukFEB	smtA,mukF,mukE,mukB	smtAp	Sigma70
1	ECK120009257	sodA	sodA	sodA	sodAp	Sigma70
1	ECK120011062	sodB	sodB	sodB	sodBp	Sigma70
1	ECK120027052	sodC	sodC	sodC	sodCp	Sigma38
2	ECK120027552	prlF-yhaV	prlF-yhaV	prlF,yhaV	sohAp	Sigma70
1	ECK120009190	sohB	sohB	sohB	sohBp1	Sigma70
1	ECK120009191	sohB	sohB	sohB	sohBp2	Sigma70
2	ECK120026832	solA-yceO	solA-yceO	solA,yceO	solAp
1	ECK120009640	soxR	soxR	soxR	soxRp	Sigma70
1	ECK120009402	soxS	soxS	soxS	soxSp	Sigma70
2	ECK120009395	speAB	speAB	speA,speB	speAp	Sigma70
1	ECK120009144	speB	speAB	speB	speBp	Sigma38
1	ECK120009316	speC	speC	speC	speCp	Sigma38
1	ECK120011087	spf	spf	spf	spfp	Sigma70
1	ECK120016547	spy	spy	spy	spyp	Sigma70
1	ECK120009008	sra	bdm-sra	sra	srap	Sigma38
7	ECK120009325	srlAEBD-gutM-srlR-gutQ	srlAEBD-gutM-srlR-gutQ	srlA,srlE,srlB,srlD,gutM,srlR,gutQ	srlAp	Sigma70
1	ECK120011117	srlR	srlAEBD-gutM-srlR-gutQ	srlR	srlRp
1	ECK120032968	sroA	sgrR-sroA-tbpA-thiPQ	sroA	sroAp
1	ECK120027774	sroH	sroH	sroH	sroHp
1	ECK120009139	ssb	ssb	ssb	ssbp1	Sigma70
1	ECK120009138	ssb	ssb	ssb	ssbp2	Sigma70
1	ECK120009258	ssb	ssb	ssb	ssbp3	Sigma70
1	ECK120020471	sseA	sseA	sseA	sseAp
1	ECK125162177	ssnA	ygfK-ssnA	ssnA	ssnAp	Sigma70
2	ECK120009549	sspAB	sspAB	sspA,sspB	sspAp
1	ECK125158012	ssrA	ssrA	ssrA	ssrAp	Sigma70
1	ECK125134699	ssrS	ssrS-fau	ssrS	ssrSp1	Sigma70
2	ECK120027477	ssrS-fau	ssrS-fau	ssrS,fau	ssrSp1	Sigma70
1	ECK125134700	ssrS	ssrS-fau	ssrS	ssrSp2	Sigma38
2	ECK120034935	ssrS-fau	ssrS-fau	ssrS,fau	ssrSp2	Sigma38
1	ECK120027540	sstT	sstT	sstT	sstTp
5	ECK120009145	ssuEADCB	ssuEADCB	ssuE,ssuA,ssuD,ssuC,ssuB	ssuEp	Sigma70
1	ECK120015324	sthA	sthA	sthA	sthAp
1	ECK120009579	stpA	stpA	stpA	stpAp1	Sigma70
1	ECK120009580	stpA	stpA	stpA	stpAp2	Sigma70
1	ECK120009581	stpA	stpA	stpA	stpAp3
2	ECK125158015	sucAB	sdhCDAB-sucABCD	sucA,sucB	sucAp	Sigma38
4	ECK120009295	sucABCD	sdhCDAB-sucABCD	sucA,sucB,sucC,sucD	sucAp	Sigma38
6	ECK120008980	sufABCDSE	sufABCDSE	sufA,sufB,sufC,sufD,sufS,sufE	sufAp	Sigma70
1	ECK120008943	sugE	sugE	sugE	sugEp
1	ECK120009259	sulA	sulA	sulA	sulAp	Sigma70
5	ECK120009550	surA-pdxA-rsmA-apaGH	lptD-surA-pdxA-rsmA-apaGH	surA,pdxA,rsmA,apaG,apaH	surAp
2	ECK120009551	umpG-pcm	umpG-pcm	umpG,pcm	surEp2	Sigma70
1	ECK120026964	sutR	sutR	sutR	sutRp	Sigma70
1	ECK120021104	sxy	sxy	sxy	sxyp	Sigma70
1	ECK120015366	symE	symE	symE	symEp	Sigma70
1	ECK120032963	symR	symR	symR	symRp	Sigma70
1	ECK120034153	talA	talA-tktB	talA	talAp
2	ECK120010983	talA-tktB	talA-tktB	talA,tktB	talAp1	Sigma38
2	ECK120015505	talA-tktB	talA-tktB	talA,tktB	talAp2	Sigma38
1	ECK120015352	talB	talB	talB	talBp
1	ECK120026998	tam	lsrACDBFG-tam	tam	tamp	Sigma38
6	ECK120010892	tar-tap-cheRBYZ	tar-tap-cheRBYZ	tar,tap,cheR,cheB,cheY,cheZ	tarp	Sigma28
3	ECK125158025	tatABC	tatABCD	tatA,tatB,tatC	tatAp1	Sigma70
4	ECK120027728	tatABCD	tatABCD	tatA,tatB,tatC,tatD	tatAp1	Sigma70
4	ECK120009736	tauABCD	tauABCD	tauA,tauB,tauC,tauD	tauAp
7	ECK120009317	tdcABCDEFG	tdcABCDEFG	tdcA,tdcB,tdcC,tdcD,tdcE,tdcF,tdcG	tdcAp
6	ECK120033599	tdcBCDEFG	tdcABCDEFG	tdcB,tdcC,tdcD,tdcE,tdcF,tdcG	tdcBp
2	ECK120009552	tehAB	tehAB	tehA,tehB	tehAp
2	ECK120011111	tesA-ybbO	tesA-ybbO	tesA,ybbO	tesAp
1	ECK120020473	tesB	tesB	tesB	tesBp
2	ECK120009835	tgt-yajC	tgt-yajC-secDF	tgt,yajC	tgtp
1	ECK120020474	thiI	thiI	thiI	thiIp
2	ECK120027202	thiMD	thiMD	thiM,thiD	thiMp
1	ECK125145761	thrL	thrLABC	thrL	thrLp	Sigma70
4	ECK120009369	thrLABC	thrLABC	thrL,thrA,thrB,thrC	thrLp	Sigma70
2	ECK120009554	thrS-infC	thrS-infC-rpmI-rplT-pheMST-ihfA	thrS,infC	thrSp
8	ECK120029427	thrS-infC-rpmI-rplT-pheMST-ihfA	thrS-infC-rpmI-rplT-pheMST-ihfA	thrS,infC,rpmI,rplT,pheM,pheS,pheT,ihfA	thrSp
5	ECK120009686	thrU-tyrU-glyT-thrT-tufB	thrU-tyrU-glyT-thrT-tufB	thrU,tyrU,glyT,thrT,tufB	thrUp	Sigma70
1	ECK120009672	thrW	thrW	thrW	thrWp	Sigma70
1	ECK120026640	tig	tig	tig	tigp1
1	ECK120034123	tig	tig	tig	tigp3
1	ECK120009117	tisB	tisB	tisB	tisBp
1	ECK120029328	tktA	tktA	tktA	tktAp1
1	ECK120015317	tktB	talA-tktB	tktB	tktBp	Sigma38
1	ECK125158020	tnaC	tnaCAB	tnaC	tnaCp	Sigma70
3	ECK120009278	tnaCAB	tnaCAB	tnaC,tnaA,tnaB	tnaCp	Sigma70
4	ECK120035091	tolC-ygiABC	tolC-ygiABC	tolC,ygiA,ygiB,ygiC	tolCp1
4	ECK120035092	tolC-ygiABC	tolC-ygiABC	tolC,ygiA,ygiB,ygiC	tolCp2
4	ECK120035093	tolC-ygiABC	tolC-ygiABC	tolC,ygiA,ygiB,ygiC	tolCp3
4	ECK120027519	tolC-ygiABC	tolC-ygiABC	tolC,ygiA,ygiB,ygiC	tolCp4	Sigma38
2	ECK120026654	tomB-hha	tomB-hha	tomB,hha	tomBp1	Sigma70
1	ECK120009358	tonB	tonB	tonB	tonBp	Sigma70
1	ECK120011101	topA	topA	topA	topAp1	Sigma32
1	ECK120011102	topA	topA	topA	topAp2	Sigma70
1	ECK120011103	topA	topA	topA	topAp3	Sigma70
1	ECK120011104	topA	topA	topA	topAp4	Sigma70
1	ECK120011105	topA	topA	topA	topAp5	Sigma70
3	ECK120009403	torCAD	torCAD	torC,torA,torD	torCp	Sigma70
1	ECK120009825	torR	torR	torR	torRp	Sigma70
1	ECK120015502	tpiA	tpiA	tpiA	tpiAp1
1	ECK120034177	tpiA	tpiA	tpiA	tpiAp2	Sigma70
1	ECK120020425	dtpA	dtpA	dtpA	tppBp	Sigma70
1	ECK120011140	tpx	tpx	tpx	tpxp	Sigma70
1	ECK120020476	tqsA	tqsA	tqsA	tqsAp
1	ECK120009582	treA	treA	treA	treAp	Sigma38
2	ECK120009404	treBC	treBC	treB,treC	treBp	Sigma70
1	ECK120016331	treF	treF	treF	treFp	Sigma38
1	ECK120009583	treR	treR	treR	treRp1	Sigma70
1	ECK120008973	treR	treR	treR	treRp2	Sigma70
1	ECK120008974	treR	treR	treR	treRp3	Sigma70
1	ECK120008975	treR	treR	treR	treRp4	Sigma70
1	ECK120034136	trg	trg	trg	trgp1	Sigma28
1	ECK120027586	trkA	trkA	trkA	trkAp
1	ECK120009615	trmA	trmA	trmA	trmAp	Sigma32
3	ECK120009734	trpCBA	trpLEDCBA	trpC,trpB,trpA	trpCp	Sigma70
1	ECK125158016	trpL	trpLEDCBA	trpL	trpLp	Sigma70
6	ECK120009260	trpLEDCBA	trpLEDCBA	trpL,trpE,trpD,trpC,trpB,trpA	trpLp	Sigma70
1	ECK120009410	trpR	trpR	trpR	trpRp	Sigma70
1	ECK120026296	trpS	aroKB-damX-dam-rpe-gph-trpS	trpS	trpSp	Sigma70
1	ECK120011084	trxA	trxA	trxA	trxAp1	Sigma70
1	ECK120011085	trxA	trxA	trxA	trxAp2	Sigma70
1	ECK120026784	trxB	trxB	trxB	trxBp
1	ECK120010913	trxC	trxC	trxC	trxCp	Sigma70
2	ECK120027108	tsaB-yeaY	tsaB-yeaY	tsaB,yeaY	tsaBp
8	ECK120051393	tsaE-amiB-mutL-miaA-hfq-hflXKC	yjeF-tsaE-amiB-mutL-miaA-hfq-hflXKC	tsaE,amiB,mutL,miaA,hfq,hflX,hflK,hflC	tsaEp
1	ECK120027600	tsgA	tsgA	tsgA	tsgAp
1	ECK120010887	tsr	tsr	tsr	tsrp	Sigma28
1	ECK120015945	tsr	tsr	tsr	tsrp1	Sigma70
1	ECK120009633	tsx	tsx	tsx	tsxp1	Sigma70
1	ECK120009634	tsx	tsx	tsx	tsxp2	Sigma70
3	ECK120009556	ttdABT	ttdABT	ttdA,ttdB,ttdT	ttdAp	Sigma70
1	ECK120021180	ttdR	ttdR	ttdR	ttdRp
1	ECK120033755	tufA	rpsLG-fusA-tufA	tufA	tufAp1	Sigma70
1	ECK125135003	tufA	rpsLG-fusA-tufA	tufA	tufAp2	Sigma70
1	ECK125162176	tynA	tynA	tynA	tynAp1	Sigma70
1	ECK120009280	tyrB	tyrB	tyrB	tyrBp	Sigma70
1	ECK120009281	tyrP	tyrP	tyrP	tyrPp1	Sigma70
1	ECK120009147	tyrP	tyrP	tyrP	tyrPp2
1	ECK120009261	tyrR	ycjXF-tyrR	tyrR	tyrRp	Sigma70
2	ECK120026298	tyrS-pdxY	pdxH-tyrS-pdxY	tyrS,pdxY	tyrSp1
2	ECK120034138	tyrS-pdxY	pdxH-tyrS-pdxY	tyrS,pdxY	tyrSp2
3	ECK120009693	tyrTV-tpr	tyrTV-tpr	tyrT,tyrV,tpr	tyrTp	Sigma70
2	ECK120033760	tyrV-tpr	tyrTV-tpr	tyrV,tpr	tyrVp
2	ECK120009557	ubiCA	ubiCA	ubiC,ubiA	ubiCp	Sigma70
1	ECK120009318	ubiG	ubiG	ubiG	ubiGp	Sigma70
1	ECK120033581	ubiX	cvpA-purF-ubiX	ubiX	ubiXp
1	ECK120027311	ucpA	ucpA	ucpA	ucpAp1
1	ECK120034152	ucpA	ucpA	ucpA	ucpAp2
1	ECK120009326	udp	udp	udp	udpP	Sigma70
5	ECK120009108	ugpBAECQ	ugpBAECQ	ugpB,ugpA,ugpE,ugpC,ugpQ	ugpBp1	Sigma70
5	ECK120009109	ugpBAECQ	ugpBAECQ	ugpB,ugpA,ugpE,ugpC,ugpQ	ugpBp2	Sigma70
1	ECK120009322	uhpT	uhpT	uhpT	uhpTp	Sigma70
3	ECK120009067	uidABC	uidABC	uidA,uidB,uidC	uidAp
1	ECK120009068	uidR	uidR	uidR	uidRp	Sigma70
6	ECK120009070	ulaABCDEF	ulaABCDEF	ulaA,ulaB,ulaC,ulaD,ulaE,ulaF	ulaAp	Sigma70
1	ECK120009071	ulaG	ulaG	ulaG	ulaGp
1	ECK120009158	umpH	nagBAC-umpH	umpH	umpHp
2	ECK120009371	umuDC	umuDC	umuD,umuC	umuDp	Sigma70
1	ECK120009135	ung	ung	ung	ungp
2	ECK120008945	uof-fur	fldA-uof-fur	uof,fur	uofp
2	ECK120009624	upp-uraA	upp-uraA	upp,uraA	uppp	Sigma70
3	ECK120009073	usg-truA-dedA	pdxB-usg-truA-dedA	usg,truA,dedA	usgp
1	ECK120009616	uspA	uspA	uspA	uspAp1	Sigma70
1	ECK120009617	uspA	uspA	uspA	uspAp2
1	ECK120009618	uspA	uspA	uspA	uspAp3
1	ECK120010881	uspB	uspB	uspB	uspBp	Sigma38
1	ECK120026924	uspE	uspE	uspE	uspEp
1	ECK120026942	uspF	uspF	uspF	uspFp
1	ECK120020480	uspG	uspG	uspG	uspGp
1	ECK120009262	uvrA	uvrA	uvrA	uvrAp	Sigma70
1	ECK120048890	uvrB	uvrB	uvrB	uvrBp1	Sigma70
1	ECK120009263	uvrB	uvrB	uvrB	uvrBp2	Sigma70
1	ECK120009183	uvrB	uvrB	uvrB	uvrBp3	Sigma70
1	ECK120011067	uvrC	uvrYC	uvrC	uvrCp3	Sigma70
1	ECK120009264	uvrD	uvrD	uvrD	uvrDp1	Sigma70
1	ECK120009182	uvrD	uvrD	uvrD	uvrDp2
2	ECK120009167	uvrYC	uvrYC	uvrY,uvrC	uvrYp2	Sigma70
1	ECK125134714	uxaB	uxaB	uxaB	uxaBp	Sigma70
2	ECK120009062	uxaCA	uxaCA	uxaC,uxaA	uxaCp	Sigma70
2	ECK120049213	uxaCA	uxaCA	uxaC,uxaA	uxaCp1
2	ECK120009708	uxuAB	uxuAB	uxuA,uxuB	uxuAp	Sigma70
1	ECK120009063	uxuR	uxuR	uxuR	uxuRp	Sigma70
1	ECK120009122	valS	holC-valS	valS	valSp1	Sigma70
1	ECK120009168	valS	holC-valS	valS	valSp2	Sigma70
4	ECK120009677	valUXY-lysV	valUXY-lysV	valU,valX,valY,lysV	valUp	Sigma70
2	ECK120009675	valVW	valVW	valV,valW	valVp	Sigma70
1	ECK120015318	ves	ves	ves	vesp	Sigma28
1	ECK120015173	waaA	waaA-coaD	waaA	waaAp1	Sigma70
2	ECK120009481	waaA-coaD	waaA-coaD	waaA,coaD	waaAp1	Sigma70
1	ECK120015174	waaA	waaA-coaD	waaA	waaAp2	Sigma70
10	ECK120015150	waaQGPSBOJYZU	waaQGPSBOJYZU	waaQ,waaG,waaP,waaS,waaB,waaO,waaJ,waaY,waaZ,waaU	waaQp1	Sigma70
2	ECK120026819	wrbA-yccJ	wrbA-yccJ	wrbA,yccJ	wrbAp	Sigma38
5	ECK120009398	wza-wzb-wzc-wcaAB	wza-wzb-wzc-wcaAB	wza,wzb,wzc,wcaA,wcaB	wzap	Sigma70
3	ECK120033239	wza-wzb-wzc	wza-wzb-wzc-wcaAB	wza,wzb,wzc	wzap2	Sigma24
2	ECK120009735	xapAB	xapAB	xapA,xapB	xapAp	Sigma70
1	ECK120009823	xapR	xapR	xapR	xapRp1	Sigma70
1	ECK120009824	xapR	xapR	xapR	xapRp2	Sigma70
3	ECK120010917	xdhABC	xdhABC	xdhA,xdhB,xdhC	xdhAp
3	ECK125095429	xdhABC	xdhABC	xdhA,xdhB,xdhC	xdhAp2	Sigma54
5	ECK120033569	xerD-dsbC-recJ	xerD-dsbC-recJ-prfB-lysS	xerD,dsbC,recJ	xerDp	Sigma32
1	ECK120011151	xseA	xseA	xseA	xseAp	Sigma70
4	ECK120009561	xseB-ispA-dxs-yajO	xseB-ispA-dxs-yajO	xseB,ispA,dxs,yajO	xseBp	Sigma70
1	ECK120011154	xthA	xthA	xthA	xthAp	Sigma38
2	ECK120009808	xylAB	xylAB	xylA,xylB	xylAp
4	ECK120009562	xylFGHR	xylFGHR	xylF,xylG,xylH,xylR	xylFp
1	ECK120009809	xylR	xylFGHR	xylR	xylRp
1	ECK120026516	yaaU	yaaU	yaaU	yaaUp	Sigma54
1	ECK120026521	yabI	yabI	yabI	yabIp	Sigma38
3	ECK120009547	yacC-speED	yacC-speED	yacC,speE,speD	yacCp	Sigma70
1	ECK120033572	yacG	coaE-zapD-yacG	yacG	yacGp
1	ECK120026530	yacL	yacL	yacL	yacLp
1	ECK120026533	yadC	yadMLKC	yadC	yadCp
2	ECK120009453	yadV-htrE	yadV-htrE	yadV,htrE	yadVp1	Sigma70
2	ECK120009589	yadV-htrE	yadV-htrE	yadV,htrE	yadVp2	Sigma38
2	ECK120009590	yadV-htrE	yadV-htrE	yadV,htrE	yadVp3	Sigma70
2	ECK120026549	yaeP-rof	yaeP-rof	yaeP,rof	yaePp
3	ECK120026550	yaeQ-arfB-nlpE	yaeQ-arfB-nlpE	yaeQ,arfB,nlpE	yaeQp
2	ECK120026555	yafDE	yafDE	yafD,yafE	yafDp	Sigma32
3	ECK120026569	yafNOP	dinB-yafNOP	yafN,yafO,yafP	yafNp	Sigma70
1	ECK120020488	yafU	yafU	yafU	yafUp
1	ECK120020489	yafV	yafV	yafV	yafVp
1	ECK120034119	yafZ	ykfA-yafZ	yafZ	yafZp
1	ECK120026586	yagK	yagK	yagK	yagKp6	Sigma70
1	ECK120026603	pdeL	pdeL	pdeL	yahAp1	Sigma70
1	ECK120030641	pdeL	pdeL	pdeL	yahAp2	Sigma70
1	ECK125095457	yahE	yahDEFG	yahE	yahEp	Sigma54
1	ECK120020493	yahO	yahO	yahO	yahOp
2	ECK120033759	yaiA-aroM	aroL-yaiA-aroM	yaiA,aroM	yaiAp
1	ECK120026628	yaiE	yaiE	yaiE	yaiEp
1	ECK120020498	yaiZ	yaiZ	yaiZ	yaiZp
3	ECK120009834	yajC-secDF	tgt-yajC-secDF	yajC,secD,secF	yajCp
1	ECK120026639	yajG	yajG-ampG	yajG	yajGp	Sigma70
2	ECK125203409	yajG-ampG	yajG-ampG	yajG,ampG	yajGp	Sigma70
1	ECK120033574	yajO	xseB-ispA-dxs-yajO	yajO	yajOp
1	ECK120020499	yajQ	yajQ	yajQ	yajQp
1	ECK120026637	yajR	yajR	yajR	yajRp
2	ECK120010925	ybaB-recR	ybaB-recR	ybaB,recR	ybaBp	Sigma24
1	ECK120026662	ybaL	ybaL	ybaL	ybaLp
1	ECK120026647	ybaO	ybaO	ybaO	ybaOp	Sigma70
1	ECK120020469	ybaQ	ybaQ	ybaQ	ybaQp
2	ECK120010914	ybaST	ybaST	ybaS,ybaT	ybaSp
2	ECK120026667	fetAB	fetAB	fetA,fetB	ybbLp
1	ECK120016408	ybbN	ybbN	ybbN	ybbNp1	Sigma32
2	ECK120034125	ybbY-glxK	gcl-hyi-glxR-ybbW-allB-ybbY-glxK	ybbY,glxK	ybbYp
1	ECK120034126	entH	entCEBAH	entH	ybdBp
1	ECK120026702	ybdN	ybdN	ybdN	ybdNp	Sigma70
2	ECK120033559	ybeD-lipB	ybeD-lipB	ybeD,lipB	ybeDp	Sigma32
1	ECK120020504	ybeL	ybeL	ybeL	ybeLp
4	ECK120033560	ybeZYX-lnt	ybeZYX-lnt	ybeZ,ybeY,ybeX,lnt	ybeZp	Sigma32
1	ECK120015367	ybfE	ybfE	ybfE	ybfEp	Sigma32
2	ECK120016563	ybfHG	ybfHG	ybfH,ybfG	ybfHp	Sigma24
2	ECK120009753	ybgA-phr	ybgA-phr	ybgA,phr	ybgAp1	Sigma38
2	ECK120034539	ybgA-phr	ybgA-phr	ybgA,phr	ybgAp2	Sigma38
5	ECK120016928	ybgIJKL-nei	ybgIJKL-nei	ybgI,ybgJ,ybgK,ybgL,nei	ybgIp1
5	ECK120016929	ybgIJKL-nei	ybgIJKL-nei	ybgI,ybgJ,ybgK,ybgL,nei	ybgIp2
1	ECK120026751	ybhC	ybhC	ybhC	ybhCp
1	ECK120026753	ybhL	ybhL	ybhL	ybhLp	Sigma70
1	ECK120020510	ybhQ	ybhQ	ybhQ	ybhQp
1	ECK120026759	ybiI	ybiI	ybiI	ybiIp6	Sigma38
1	ECK120016180	ldtB	ldtB	ldtB	ybisp
1	ECK120020449	ybiT	ybiT	ybiT	ybiTp
4	ECK120008967	ybjC-nfsA-rimK-ybjN	ybjC-nfsA-rimK-ybjN	ybjC,nfsA,rimK,ybjN	ybjCp	Sigma70
1	ECK120015492	ybjG	ybjG	ybjG	ybjGp
1	ECK120033753	ybjN	ybjC-nfsA-rimK-ybjN	ybjN	ybjNp
1	ECK120015510	ybjP	ybjP	ybjP	ybjPp	Sigma38
2	ECK120026779	ybjQ-amiD	ybjQ-amiD	ybjQ,amiD	ybjQp
1	ECK120020459	ybjX	ybjX	ybjX	ybjXp
2	ECK120026794	ycaR-kdsB	ycaR-kdsB	ycaR,kdsB	ycaRp	Sigma70
1	ECK120026796	ldtD	ldtD	ldtD	ycbBp
1	ECK120026795	ycbJ	ycbJ	ycbJ	ycbJp
2	ECK120026797	ycbK-gloC	ycbK-gloC	ycbK,gloC	ycbKp
1	ECK120026811	yccA	yccA	yccA	yccAp	Sigma70
1	ECK120026818	yccE	yccE	yccE	yccEp
2	ECK120026805	yccFS	yccFS	yccF,yccS	yccFp
1	ECK120026807	yccT	yccT	yccT	yccTp
1	ECK120021107	dgcT	dgcT	dgcT	ycdTp	Sigma70
1	ECK120026826	ycdZ	ycdZ	ycdZ	ycdZp4	Sigma70
1	ECK120009188	yceA	yceA	yceA	yceAp
2	ECK120009801	yceD-rpmF	yceD-rpmF-plsX-fabHDG-acpP-fabF	yceD,rpmF	yceDp1
2	ECK120009802	yceD-rpmF	yceD-rpmF-plsX-fabHDG-acpP-fabF	yceD,rpmF	yceDp2
2	ECK120026831	yceJI	yceJI	yceJ,yceI	yceJp	Sigma32
1	ECK120026843	ldtC	ldtC	ldtC	ycfSp	Sigma70
1	ECK120021111	ycgB	ycgB	ycgB	ycgBp
1	ECK120026874	ycgL	ycgL	ycgL	ycgLp
1	ECK120010893	ycgR	ycgR	ycgR	ycgRp	Sigma28
4	ECK120051389	ycgZ-ymgA-ariR-ymgC	ycgZ-ymgA-ariR-ymgC	ycgZ,ymgA,ariR,ymgC	ycgZp	Sigma38
1	ECK120008957	ychF	pth-ychF	ychF	ychFp	Sigma70
1	ECK120021114	ychH	ychH	ychH	ychHp	Sigma70
1	ECK120026887	ychJ	ychJ	ychJ	ychJp
1	ECK120021116	ychO	ychO	ychO	ychOp	Sigma70
3	ECK120009737	ychQA-kdsA	ychQA-kdsA	ychQ,ychA,kdsA	ychQp	Sigma70
2	ECK120026894	yciCB	yciCB	yciC,yciB	yciCp	Sigma70
1	ECK125122030	yciE	yciGFE	yciE	yciEp	Sigma70
1	ECK125122029	yciG	yciGFE	yciG	yciGp	Sigma38
3	ECK120026897	yciGFE	yciGFE	yciG,yciF,yciE	yciGp	Sigma38
1	ECK120026892	yciI	yciI	yciI	yciIp
1	ECK125136335	yciT	yciZT	yciT	yciTp	Sigma38
3	ECK120026898	yciVOQ	yciVOQ	yciV,yciO,yciQ	yciVp
1	ECK120026907	yciW	yciW	yciW	yciWp	Sigma70
2	ECK120020427	yciZT	yciZT	yciZ,yciT	yciZp	Sigma38
1	ECK120021118	ycjG	ycjG	ycjG	ycjGp
3	ECK120033562	ycjXF-tyrR	ycjXF-tyrR	ycjX,ycjF,tyrR	ycjXp	Sigma32
1	ECK120026919	ycjY	ycjY-ymjDC-mpaA	ycjY	ycjYp6	Sigma32
4	ECK125158026	ycjY-ymjDC-mpaA	ycjY-ymjDC-mpaA	ycjY,ymjD,ymjC,mpaA	ycjYp6	Sigma32
1	ECK120026926	ydaN	ydaN	ydaN	ydaNp
1	ECK120026951	ydbD	ydbD	ydbD	ydbDp	Sigma38
1	ECK120021122	ydbJ	ydbJ	ydbJ	ydbJp
1	ECK120021123	ydbK	ydbK-ompN	ydbK	ydbKp
2	ECK125162168	ydbK-ompN	ydbK-ompN	ydbK,ompN	ydbKp
2	ECK125135647	ydbK-ompN	ydbK-ompN	ydbK,ompN	ydbKp4	Sigma38
1	ECK120021124	ydcI	ydcI	ydcI	ydcIp
1	ECK120026967	ydcR	ydcR	ydcR	ydcRp
5	ECK125160780	ydcSTUV-patD	ydcSTUV-patD	ydcS,ydcT,ydcU,ydcV,patD	ydcSp1	Sigma38
1	ECK120026983	yddG	yddG	yddG	yddGp	Sigma38
1	ECK120010885	ydeA	ydeA	ydeA	ydeAp
1	ECK125135688	ydeI	ydeI	ydeI	ydeIp5	Sigma70
1	ECK120021130	ydeJ	ydeJ	ydeJ	ydeJp	Sigma70
2	ECK125135682	ydeNM	ydeNM	ydeN,ydeM	ydeNp	Sigma70
1	ECK120015334	ydeO	safA-ydeO	ydeO	ydeOp
1	ECK120015478	ydeP	ydeP	ydeP	ydePp	Sigma70
1	ECK120026991	ydeQ	ydeQ	ydeQ	ydeQp
1	ECK120027008	ydfG	ydfG	ydfG	ydfGp
1	ECK120027009	ydfH	ydfH	ydfH	ydfHp
1	ECK120027013	ydfK	ydfK	ydfK	ydfKp
1	ECK120027044	ydgA	ydgA	ydgA	ydgAp
8	ECK120016930	ydgK-rsxABCDGE-nth	ydgK-rsxABCDGE-nth	ydgK,rsxA,rsxB,rsxC,rsxD,rsxG,rsxE,nth	ydgKp
3	ECK120016697	ydhIJK	ydhIJK	ydhI,ydhJ,ydhK	ydhIp	Sigma24
1	ECK120027055	mepH	mepH	mepH	ydhOp	Sigma70
1	ECK120021133	ydhQ	ydhQ	ydhQ	ydhQp	Sigma32
6	ECK120034535	ydhYVWXUT	ydhYVWXUT	ydhY,ydhV,ydhW,ydhX,ydhU,ydhT	ydhYp	Sigma38
1	ECK120021134	ydiP	ydiP	ydiP	ydiPp
1	ECK120020536	ydiU	ydiU	ydiU	ydiUp
1	ECK120027073	ydiV	ydiV	ydiV	ydiVp	Sigma24
3	ECK120009544	ydjA-selD-topB	ydjA-selD-topB	ydjA,selD,topB	ydjAp
1	ECK120015363	ydjM	ydjM	ydjM	ydjMp	Sigma70
1	ECK120027094	yeaE	yeaE	yeaE	yeaEp	Sigma70
2	ECK120008997	yeaGH	yeaGH	yeaG,yeaH	yeaGp1	Sigma54
2	ECK120034141	yeaGH	yeaGH	yeaG,yeaH	yeaGp2
1	ECK120021136	yeaL	yeaL	yeaL	yeaLp
1	ECK120021138	dgcP	dgcP	dgcP	yeaPp
2	ECK120027102	yeaR-yoaG	yeaR-yoaG	yeaR,yoaG	yeaRp	Sigma70
1	ECK120010930	yeaY	tsaB-yeaY	yeaY	yeaYp	Sigma24
1	ECK120015362	yebB	yebB	yebB	yebBp1	Sigma70
1	ECK120015361	yebB	yebB	yebB	yebBp2
2	ECK120015358	yebC-ruvC	nudB-yebC-ruvC	yebC,ruvC	yebCp	Sigma70
1	ECK120027130	yebE	yebE	yebE	yebEp	Sigma70
1	ECK120027132	yebG	yebG	yebG	yebGp	Sigma70
1	ECK120021140	yecF	yecF	yecF	yecFp	Sigma28
1	ECK120016590	yecR	yecR	yecR	yecRp
1	ECK120027138	yecT	yecT	yecT	yecTp
1	ECK120027160	yedX	yedX	yedX	yedXp	Sigma70
2	ECK120027179	yeeED	yeeED	yeeE,yeeD	yeeEp
2	ECK120027183	yefM-yoeB	yefM-yoeB	yefM,yoeB	yefMp	Sigma70
1	ECK120021147	yegH	yegH	yegH	yegHp
2	ECK120015335	yegRZ	yegRZ	yegR,yegZ	yegRp	Sigma70
3	ECK120027199	yegTUV	yegTUV	yegT,yegU,yegV	yegTp
1	ECK120027200	yegW	yegW	yegW	yegWp
1	ECK120027214	yehR	yehR	yehR	yehRp
1	ECK120027215	yehS	yehS	yehS	yehSp
1	ECK120009831	yeiL	yeiL	yeiL	yeiLp	Sigma38
1	ECK120027237	yeiP	yeiP	yeiP	yeiPp
2	ECK120027228	preTA	preTA	preT,preA	yeiTp	Sigma70
1	ECK120027908	yeiW	yeiW	yeiW	yeiWp
1	ECK120027243	yejG	yejG	yejG	yejGp
1	ECK125165383	yejG	yejG	yejG	yejGp2
1	ECK120027245	radD	radD	radD	yejHp	Sigma54
1	ECK120016591	yejO	yejO	yejO	yejOp
1	ECK120027256	yfaY	yfaY	yfaY	yfaYp
1	ECK120027269	yfbR	alaA-yfbR	yfbR	yfbRp3	Sigma32
2	ECK120027271	yfbUT	yfbUT	yfbU,yfbT	yfbUp
1	ECK120027274	yfcD	yfcD	yfcD	yfcDp
1	ECK120027275	yfcE	yfcE	yfcE	yfcEp
1	ECK120027286	yfcZ	yfcZ	yfcZ	yfcZp
5	ECK120015484	yfdX-frc-oxc-yfdVE	yfdX-frc-oxc-yfdVE	yfdX,frc,oxc,yfdV,yfdE	yfdXp	Sigma70
2	ECK125158013	yfeCD	yfeCD	yfeC,yfeD	yfeCp
2	ECK120016549	yfeKS	yfeKS	yfeK,yfeS	yfeKp	Sigma24
2	ECK120010933	yfeYX	yfeYX	yfeY,yfeX	yfeYp	Sigma24
3	ECK120027329	yffB-dapE-ypfN	yffB-dapE-ypfN	yffB,dapE,ypfN	yffBp
2	ECK125136336	yffOP	yffOP	yffO,yffP	yffOp	Sigma38
1	ECK120021162	pdeF	pdeF	pdeF	yfgFp
1	ECK120027334	yfgG	yfgG	yfgG	yfgGp
1	ECK120034155	yfgM	yfgM	yfgM	yfgMp1
1	ECK120034156	yfgM	yfgM	yfgM	yfgMp2
1	ECK120034157	yfgM	yfgM	yfgM	yfgMp3
1	ECK120027354	yfhL	yfhL	yfhL	yfhLp
2	ECK120027338	yfhM-pbpC	yfhM-pbpC	yfhM,pbpC	yfhMp
3	ECK120027364	yfiR-dgcN-yfiB	yfiR-dgcN-yfiB	yfiR,dgcN,yfiB	yfiRp	Sigma70
1	ECK120010923	ygaC	ygaC	ygaC	ygaCp
1	ECK120027395	ygaM	ygaM	ygaM	ygaMp
1	ECK120027392	ygaU	ygaU	ygaU	ygaUp4	Sigma38
1	ECK120016778	ygbA	ygbA	ygbA	ygbAp
1	ECK120033558	cas2	casABCDE12	cas2	ygbFp	Sigma32
1	ECK120029601	ygbK	ygbJK	ygbK	ygbKp	Sigma28
1	ECK120027447	ygeH	ygeH	ygeH	ygeHp10	Sigma70
1	ECK120021172	ygeV	ygeV	ygeV	ygeVp
4	ECK120027475	ygfB-pepP-ubiHI	ygfB-pepP-ubiHI	ygfB,pepP,ubiH,ubiI	ygfBp	Sigma70
2	ECK120027465	ygfK-ssnA	ygfK-ssnA	ygfK,ssnA	ygfKp	Sigma54
1	ECK120021173	ygfZ	ygfZ	ygfZ	ygfZp
2	ECK120033745	yggDC	cmtBA-yggPFDC	yggD,yggC	yggDp
1	ECK120015511	yggE	yggE	yggE	yggEp1	Sigma38
1	ECK120015512	yggE	yggE	yggE	yggEp2	Sigma38
1	ECK120010945	yggN	yggN	yggN	yggNp1	Sigma24
1	ECK120010946	yggN	yggN	yggN	yggNp2	Sigma24
1	ECK120015312	yggN	yggN	yggN	yggNp2b
1	ECK120009094	yggX	mutY-yggX-mltC-nupG	yggX	yggXp
2	ECK120009095	yggX-mltC	mutY-yggX-mltC-nupG	yggX,mltC	yggXp
3	ECK120009091	yggX-mltC-nupG	mutY-yggX-mltC-nupG	yggX,mltC,nupG	yggXp
1	ECK120027504	yghB	yghB	yghB	yghBp
[truncated: 1,559 more rows]
[truncated: 2 more columns]

## Sheet: UNIGENES
Unigenes Distribution: Operons to contain only a gene
Data source Regulon DB v9.0
Description of columns:
1.- ID TU designed by RegulonDB v9.0
2.- TU name
3.- Operon name
4.- Gene name
5.- Promoter name
6.- Number of TUs in the operon
ID UT	TU name	Operon name	Gene	Promoter	#TU
ECK120026783	aat	aat	aat	aatp5	1
ECK120021183	abgR	abgR	abgR		1
ECK120026739	abrB	abrB	abrB		1
ECK120009420	accA	accA	accA	accAp	1
ECK120009422	accD	accD	accD	accDp	1
ECK120021187	acpH	acpH	acpH		1
ECK120027624		acpT	acpT		1
ECK120034124	acrB	acrAB	acrB	acrBp	1
ECK120015960	acrR	acrR	acrR	acrRp	1
ECK120027046	add	add	add	addp6	1
ECK120029315	adhP	adhP	adhP	adhPp5	1
ECK120009425	adiA	adiA	adiA	adiAp	1
ECK120027806	adiC	adiC	adiC	adiCp7	1
ECK120011167	adiY	adiY	adiY	adiYp	1
ECK120011056	adk	adk	adk	adkp	1
ECK120026302	adrA	adrA	adrA	adrAp	1
ECK120027328	aegA	aegA	aegA		1
ECK120010891	aer	aer	aer	aerp	1
ECK120009083	aes	aes	aes	aesp	1
ECK120009142	agaR	agaR	agaR	agaRp	1
ECK120015319	agp	agp	agp	agpp	1
ECK120016699	ahpF	ahpCF	ahpF	ahpFp	1
ECK120009288	aidB	aidB	aidB	aidBp	1
ECK120027301	alaC	alaC	alaC	alaCp	1
ECK120011073	alaS	alaS	alaS	alaSp	1
ECK120009709	aldA	aldA	aldA	aldAp	1
ECK120009330	aldB	aldB	aldB	aldBp	1
ECK120009195	alkA	alkA	alkA	alkAp	1
ECK120015329	allA	allA	allA	allAp	1
ECK120026303	allR	allR	allR	allRp	1
ECK120015330	allS	allS	allS	allSp	1
ECK120029326	alpA	alpA	alpA		1
ECK120030123	alsK	alsK	alsK	alsKp1	1
ECK120011068	amn	amn	amn	amnp1	1
ECK120009726	ampC	ampC	ampC	ampCp	1
ECK120015322	amyA	amyA	amyA	amyAp	1
ECK120027051	anmK	anmK	anmK	anmKp9	1
ECK120027250	apbE	apbE	apbE	apbEp1	1
ECK120027793	aphA	aphA	aphA		1
ECK120029303	apt	apt	apt	aptp	1
ECK120009196	araC	araC	araC	araCp	1
ECK120009269	araE	araE	araE	araEp	1
ECK120009292	araJ	araJ	araJ	araJp	1
ECK120009097	arcB	arcB	arcB	arcBp	1
ECK120020463	arcZ	arcZ	arcZ	arcZp	1
ECK120027588	arfA	arfA	arfA	yhdLp3	1
ECK120020424	argA	argA	argA	argAp	1
ECK120009303	argD	argD	argD	argDp	1
ECK120009198	argF	argF	argF	argFp	1
ECK120009085	argG	argG	argG	argGp	1
ECK120009199	argI	argI	argI	argIp	1
ECK120027482	argO	argO	argO	argOp	1
ECK120010883	argP	argP	argP	argPp	1
ECK120029317	argS	argS	argS	argSp4	1
ECK120009673	argU	argU	argU	argUp	1
ECK120009682	argW	argW	argW	argWp	1
ECK120009202	aroG	aroG	aroG	aroGp	1
ECK125135010	arrS	arrS	arrS	arrSp	1
ECK120015356	artJ	artJ	artJ	artJp	1
ECK120009432	ascG	ascG	ascG	ascGp	1
ECK120027612	asd	asd	asd		1
ECK120021192	aslA	aslA	aslA		1
ECK120026317	aslB	aslB	aslB	aslBp	1
ECK120027190	asmA	asmA	asmA		1
ECK120009304	asnA	asnA	asnA	asnAp	1
ECK120011057	asnB	asnB	asnB	asnBp	1
ECK120026799	asnS	asnS	asnS	asnSp	1
ECK120009679	asnT	asnT	asnT	asnTp	1
ECK120009680	asnU	asnU	asnU	asnUp	1
ECK120009681	asnV	asnV	asnV	asnVp	1
ECK120008995	asnW	asnW	asnW		1
ECK120011059	aspC	aspC	aspC	aspCp	1
ECK120030193	aspT	aspT	aspT	aspTp1	1
ECK120030195	aspU	aspU	aspU	aspUp	1
ECK120009671	aspV	aspV	aspV	aspVp	1
ECK120008954	asr	asr	asr	asrp	1
ECK120020497	atl	atl	atl		1
ECK120027661	avtA	avtA	avtA	avtAp	1
ECK125095420	azuC	azuC	azuC	azuCp	1
ECK120008993	bacA	bacA	bacA	bacAp	1
ECK120010926	bamE	bamE	bamE	smpAp	1
ECK120016216	barA	barA	barA		1
ECK120011138	bcp	bcp	bcp	bcp	1
ECK120029321	bcr	bcr	bcr		1
ECK120016336	bcsQ	bcsQ	bcsQ		1
ECK120027842	bdcA	bdcA	bdcA	bdcAp	1
ECK120027843	bdcR	bdcR	bdcR	bdcRp4	1
ECK120009308	betT	betT	betT	betTp	1
ECK120016701	bglA	bglA	bglA		1
ECK120015323	bglX	bglX	bglX	bglXp	1
ECK120009206	bioA	bioA	bioA	bioAp	1
ECK120021194	bioH	bioH	bioH	bioHp	1
ECK120009126	blc	blc	blc	blcp	1
ECK120027047	blr	blr	blr	blrp	1
ECK120015485	borD	borD	borD	borDp	1
ECK120027828	bsmA	bsmA	bsmA		1
ECK120026771	bssR	bssR	bssR	bssRp5	1
ECK120026560	C0067	C0067	C0067		1
ECK120026851	C0293	C0293	C0293		1
ECK120030224	C0299	C0299	C0299		1
ECK120030164	C0362	C0362	C0362		1
ECK120027910	C0465	C0465	C0465		1
ECK120027906	C0614	C0614	C0614		1
ECK120030163	C0664	C0664	C0664		1
ECK120027904	C0719	C0719	C0719		1
ECK120009310	cadC	cadC	cadC	cadCp	1
ECK120009715	caiF	caiF	caiF	caiFp	1
ECK120021196	can	can	can	canp	1
ECK120027410	cas3	cas3	cas3		1
ECK120008948	cbl	cbl	cbl	cblp	1
ECK120027703	cbrC	cbrBC	cbrC		1
ECK120009029	cdaR	cdaR	cdaR	cdaRp	1
ECK120011119	cdd	cdd	cdd	cddp	1
ECK120027073	cdgR	cdgR	cdgR	cdgRp	1
ECK120009127	cdh	cdh	cdh	cdhp	1
ECK120009820	cedA	cedA	cedA	cedAp	1
ECK120021197	chaA	chaA	chaA		1
ECK120008988	chiA	chiA	chiA	chiAp	1
ECK120015369	cho	cho	cho	chop	1
ECK120026536	clcA	clcA	clcA	clcAp10	1
ECK120027034	clcB	clcB	clcB		1
ECK120009606	clpB	clpB	clpB	clpBp	1
ECK120027898	coaA	coaA	coaA	coaAp	1
ECK125135802	cobT	cobUST	cobT	cobTp8	1
ECK120026646	cof	cof	cof		1
ECK120011123	copA	copA	copA	copAp	1
ECK120009639	corA	corA	corA	corAp	1
ECK120009312	cpdB	cpdB	cpdB	cpdBp	1
ECK120008917	cpxP	cpxP	cpxP	cpxPp	1
ECK120026525	cra	cra	cra	fruRp8	1
ECK120027426	csdL	csdL	csdL		1
ECK120009011	csiE	csiE	csiE	csiEp	1
ECK120010985	cspB	cspB	cspB	cspBp	1
ECK120009128	cspD	cspD	cspD	cspDp	1
ECK120010986	cspG	cspG	cspG	cspGp	1
ECK120010984	cspI	cspI	cspI	cspIp	1
ECK120009047	csrB	csrB	csrB	csrBp	1
ECK120009052	csrC	csrC	csrC	csrCp	1
ECK120029332	csrD	csrD	csrD	csrDp4	1
ECK120010915	cueO	cueO	cueO	cueOp	1
ECK120026665	cueR	cueR	cueR	cueRp6	1
ECK120029314	curA	curA	curA	yncBp4	1
ECK120009751	cutA	cutA	cutA	cutAp	1
ECK120026879	cvrA	cvrA	cvrA	cvrAp6	1
ECK120027196	cyaR	cyaR	cyaR	cyaRp	1
ECK120027899	cyaY	cyaY	cyaY	cyaYp5	1
ECK120027839	cybC	cybC	cybC		1
ECK120027831	cycA	cycA	cycA	cycAp	1
ECK120009335	cynR	cynR	cynR	cynRp	1
ECK120009270	cysB	cysB	cysB	cysBp	1
ECK120009129	cysE	cysE	cysE	cysEp	1
ECK120029338	cysQ	cysQ	cysQ		1
ECK120020429	cysS	cysS	cysS	cysSp	1
ECK120029322	cysZ	cysZ	cysZ	cysZp1	1
ECK120011088	cytR	cytR	cytR	cytRp	1
ECK120021201	dacB	dacB	dacB	dacBp5	1
ECK120021202	dacC	dacC	dacC	dacCp	1
ECK120027178	dacD	dacD	dacD		1
ECK120021203	dcp	dcp	dcp	dcpp3	1
ECK120008951	dctA	dctA	dctA	dctAp	1
ECK120010895	dcuC	dcuC	dcuC	dcuCp	1
ECK120021204	ddlA	ddlA	ddlA		1
ECK120011050	degP	degP	degP	degPp	1
ECK120026773	deoR	deoR	deoR	deoRp	1
ECK120030182	dfp	dfp	dfp	dfpp	1
ECK120015344	dhaR	dhaR	dhaR	dhaRp	1
ECK120030169	diaA	diaA	diaA		1
ECK120027026	dicA	dicA	dicA		1
ECK120027028	dicF	dicF	dicF		1
ECK120027679	dinD	dinD	dinD	dinDp	1
ECK120010981	dinG	dinG	dinG	dinGp	1
ECK120026833	dinI	dinI	dinI	dinIp	1
ECK120015365	dinQ	dinQ	dinQ	dinQp	1
ECK120026518	djlA	djlA	djlA	djlAp3	1
ECK120026554	dkgB	dkgB	dkgB	dkgBp	1
ECK120027105	dmlA	dmlA	dmlA	dmlAp4	1
ECK120027104	dmlR	dmlR	dmlR	dmlRp3	1
ECK120027792	dnaB	dnaB	dnaB	dnaBp	1
ECK120026658	dnaX	dnaX	dnaX	dnaXp	1
ECK120009367	dps	dps	dps	dpsp	1
ECK120026877	dsbB	dsbB	dsbB	dsbBp6	1
ECK120029305	dsbG	dsbG	dsbG	dsbGp	1
ECK120009340	dsdC	dsdC	dsdC	dsdCp	1
ECK120021206	dsrA	dsrA	dsrA	dsrAp	1
ECK120021207	dsrB	dsrB	dsrB	dsrBp5	1
ECK120027633	dtpB	dtpB	dtpB		1
ECK120027224	dusC	dusC	dusC	dusCp	1
ECK120021128	eamA	eamA	eamA		1
ECK120021167	eamB	eamB	eamB		1
ECK120027530	ebgR	ebgR	ebgR	ebgRp	1
ECK120010882	efp	efp	efp	efpp	1
ECK120027260	elaB	elaB	elaB	elaBp	1
ECK120027263	elaD	elaD	elaD	elaDp8	1
ECK120029334	emrD	emrD	emrD	emrDp	1
ECK120021209	emtA	emtA	emtA	emtAp4	1
ECK120030171	eptA	eptA	eptA		1
ECK120027652	eptB	eptB	eptB	eptBp	1
ECK120027169	erfK	erfK	erfK	erfKp4	1
ECK120020534	erpA	erpA	erpA	erpAp	1
ECK120009064	exuR	exuR	exuR	exuRp	1
ECK120009285	fabA	fabA	fabA	fabAp	1
ECK120011070	fabB	fabB	fabB	fabBp	1
ECK120026908	fabI	fabI	fabI	fabIp1	1
ECK120021211	fadE	fadE	fadE	fadEp	1
ECK120027533	fadH	fadH	fadH	fadHp	1
ECK120009273	fadL	fadL	fadL	fadLp	1
ECK120026643	fadM	fadM	fadM	fadMp1	1
ECK120017003	fbaB	fbaB	fbaB	fbaBp	1
ECK120016182	fbp	fbp	fbp		1
ECK120027748	fdhD	fdhD	fdhD		1
ECK120009343	fdhF	fdhF	fdhF	fdhFp	1
ECK120021213	feaB	feaB	feaB	feaBp	1
ECK120009779	feaR	feaR	feaR	feaRp	1
ECK120009355	fepB	fepB	fepB	fepBp	1
ECK120027365	ffh	ffh	ffh	ffhp	1
ECK120008978	fhuE	fhuE	fhuE	fhuEp	1
ECK120009722	fimE	fimE	fimE	fimEp	1
ECK120021214	fimZ	fimZ	fimZ	fimZp3	1
ECK120010909	fiu	fiu	fiu	fiup	1
ECK120027830	fklB	fklB	fklB		1
ECK120010918	fldB	fldB	fldB	fldBp	1
ECK120010886	fliC	fliC	fliC	fliCp	1
ECK120009074	flk	flk	flk	flKp	1
ECK120008952	flxA	flxA	flxA	flxAp	1
ECK120009215	fnr	fnr	fnr	fnrp	1
ECK125108715	fnrS	fnrS	fnrS	fnrSp	1
ECK120009121	folA	folA	folA	folAp	1
ECK120029330	folB	folB	folB	folBp5	1
ECK120009379	fpr	fpr	fpr	fprp	1
ECK120015482	frc	frc	frc	frcp	1
ECK120026572	frsA	frsA	frsA	frsAp	1
ECK120030140	frwD	frwD	frwD		1
ECK120021215	fsaA	fsaA	fsaA	fsaAp6	1
ECK120027142	ftnA	ftnA	ftnA	ftnAp	1
ECK120030141	ftsB	ftsB	ftsB	ftsBp	1
ECK120009296	fumA	fumA	fumA	fumAp	1
ECK120009297	fumC	fumC	fumC	fumCp	1
ECK120008955	fxsA	fxsA	fxsA	fxsAp	1
ECK120009100	gadY	gadY	gadY	gadYp	1
ECK120030172	galF	galF	galF	galFp	1
ECK120015171	galP	galP	galP	galPp	1
ECK120009186	galR	galR	galR	galRp	1
ECK120009217	galS	galS	galS	galSp	1
ECK120015321	galU	galU	galU	galUp	1
ECK120009025	garD	garD	garD	garDp	1
ECK120015949	gatR_1	gatR_1	gatR_1		1
ECK120015346	gatR_2	gatR_2	gatR_2	gatR_2p	1
ECK120009362	gcvA	gcvA	gcvA	gcvAp	1
ECK120009114	gcvB	gcvB	gcvB	gcvBp	1
ECK120011139	gcvR	gcvR	gcvR	gcvRp	1
ECK120008942	gdhA	gdhA	gdhA	gdhAp1	1
ECK120026814	gfcA	gfcA	gfcA	gfcAp1	1
ECK120021217	ggt	ggt	ggt		1
ECK120026824	ghrA	ghrA	ghrA	ghrAp6	1
ECK120027657	ghrB	ghrB	ghrB	ghrBp2	1
ECK120008963	glcC	glcC	glcC	glcCp	1
ECK120020464	glmZ	glmZ	glmZ	glmZp	1
ECK120015509	gloA	gloA	gloA	gloAp	1
ECK120026557	gloB	gloB	gloB	gloBp5	1
ECK120009224	glpD	glpD	glpD	glpDp	1
ECK120010961	glrK	glrK	glrK	glrKp	1
ECK120021218	gltS	gltS	gltS	gltSp3	1
ECK120009383	glyA	glyA	glyA	glyAp	1
ECK120026553	gmhB	gmhB	gmhB	gmhBp	1
ECK120027681	gmk	gmk	gmk	gmkp	1
ECK120010941	gmr	gmr	gmr	gmrp	1
ECK120011069	gnd	gnd	gnd	gndp	1
ECK120027017	gnsB	gnsB	gnsB	gnsBp	1
ECK120009058	gntP	gntP	gntP	gntPp	1
ECK120027712	gpp	gpp	gpp		1
ECK120009597	grpE	grpE	grpE	grpEp	1
ECK120009817	grxA	grxA	grxA	grxAp	1
ECK120027673	grxC	grxC	grxC	grxCp2	1
ECK120021219	grxD	grxD	grxD	grxD	1
ECK120027398	gshA	gshA	gshA		1
ECK120021220	gsk	gsk	gsk		1
ECK120027501	gss	gss	gss	gssp	1
ECK120027049	gstA	gstA	gstA	gstAp	1
ECK120021062	gstB	gstB	gstB	gstBp	1
ECK120021221	guaC	guaC	guaC		1
ECK120009332	gyrA	gyrA	gyrA	gyrAp	1
ECK120008979	gyrB	gyrB	gyrB	gyrBp	1
ECK120015176	hcaR	hcaR	hcaR	hcaRp	1
ECK120027333	hda	hda	hda	hdap	1
ECK120010970	hdeD	hdeD	hdeD	hdeDp	1
ECK120027045	hdhA	hdhA	hdhA	hdhAp	1
ECK120021223	helD	helD	helD	helDp	1
ECK120026621	hemB	hemB	hemB	hemBp7	1
ECK120026661	hemH	hemH	hemH	hemHp	1
ECK120009130	hemN	hemN	hemN	hemNp	1
ECK120011071	hisS	hisS	hisS	hisSp	1
ECK120009794	hlyE	hlyE	hlyE	hlyEp	1
ECK120011072	hmp	hmp	hmp	hmpAp	1
ECK120009331	hns	hns	hns	hnsp	1
ECK120027604	hofQ	hofQ	hofQ		1
ECK120021224	hokA	hokA	hokA	hokAp6	1
ECK120026957	hokB	hokB	hokB		1
ECK120015368	hokE	hokE	hokE	hokEp	1
ECK120010904	hpt	hpt	hpt	hptp	1
ECK120026953	hrpA	hrpA	hrpA		1
ECK120026534	hrpB	hrpB	hrpB	hrpBp2	1
ECK120026943	hslJ	hslJ	hslJ	hslJp	1
ECK120026808	hspQ	hspQ	hspQ	hspQp	1
ECK120009586	htpX	htpX	htpX	htpXp	1
ECK120009773	hupA	hupA	hupA	hupAp	1
ECK120026860	icdC	icdC	icdC		1
ECK120009021	iclR	iclR	iclR	iclRp	1
ECK120009041	idnK	idnK	idnK	idnkp	1
ECK120009684	ileX	ileX	ileX	ileXp	1
ECK120027388	ileY	ileY	ileY		1
ECK120009283	ilvC	ilvC	ilvC	ilvCp	1
ECK120009226	ilvY	ilvY	ilvY	ilvYp	1
ECK120010900	inaA	inaA	inaA	inaAp	1
ECK120021244	insG	insG	insG	insGp6	1
ECK120021245	insH-1	insH-1	insH-1	insHp5	1
ECK120021246	insH-10	insH-10	insH-10		1
ECK120030186	insH-2	insH-2	insH-2	insHp4	1
ECK120026922	insH-4	insH-4	insH-4	insHp7	1
ECK120021248	insH-5	insH-5	insH-5	insHp3	1
ECK120021249	insH-8	insH-8	insH-8		1
ECK120021250	insH-9	insH-9	insH-9	insHp4	1
ECK120026948	insI-2	insI-2	insI-2		1
ECK120030203	insJ	insJ	insJ	insJp4	1
ECK120015364	insK	insK	insK	insKp	1
ECK120026699	insL-2	insL-2	insL-2	insLp5	1
ECK120027306	insL-3	insL-3	insL-3	insLp5	1
ECK120027856	insN-2	insN-2	insN-2	insNp	1
ECK120027373	intA	intA	intA		1
ECK120027849	intB	intB	intB		1
ECK120021251	intD	intD	intD	intDp6	1
ECK120026589	intF	intF	intF		1
ECK120021252	intG	intG	intG		1
ECK120027316	intZ	intZ	intZ	intZp3	1
ECK120027339	IS128	IS128	IS128		1
ECK120029331	ispB	ispB	ispB		1
ECK120021253	isrA	isrA	isrA		1
ECK120027141	isrB	isrB	isrB		1
ECK120030160	isrC	isrC	isrC		1
ECK120015175	istR-1	istR-1	istr-1	istR-1p	1
ECK120015152	istR-2	istR-2	istr-2	istR-2p	1
ECK120009131	katE	katE	katE	katEp	1
ECK120009227	katG	katG	katG	katGp	1
ECK120010959	kch	kch	kch	kchp	1
ECK120015156	kdgK	kdgK	kdgK		1
ECK120027751	kdgT	kdgT	kdgT		1
ECK120027439	kduD	kduD	kduD		1
ECK120027440	kduI	kduI	kduI	kduIp5	1
ECK120026655	kefA	kefA	kefA	kefAp	1
ECK120021256	kptA	kptA	kptA		1
ECK120026567	lafU	lafU	lafU		1
ECK120026880	ldcA	ldcA	ldcA	ldcAp9	1
ECK120008926	ldcC	ldcC	ldcC	ldcCp	1
ECK120016405	ldhA	ldhA	ldhA	ldhAp	1
ECK120021257	ldrA	ldrA	ldrA	ldrAp8	1
ECK120021258	ldrB	ldrB	ldrB	ldrBp5	1
ECK120021259	ldrC	ldrC	ldrC	ldrCp4	1
ECK120021260	ldrD	ldrD	ldrD	ldrDp	1
ECK120027103	leuE	leuE	leuE	leuEp4	1
ECK120026524	leuO	leuO	leuO	leuOp	1
ECK120009688	leuX	leuX	leuX	leuXp	1
ECK120027916	lfhA	lfhA	lfhA		1
ECK120030170	ligT	ligT	ligT		1
ECK120026712	lipA	lipA	lipA	lipAp	1
ECK120009374	livJ	livJ	livJ	livJp	1
ECK120026561	lpcA	lpcA	lpcA	lpcAp1	1
ECK120030167	lpoA	lpoA	lpoA	lpoAp2	1
ECK120009187	lpxL	lpxL	lpxL	lpxLp	1
ECK120027135	lpxM	lpxM	lpxM	lpxMp4	1
ECK120010924	lpxP	lpxP	lpxP	lpxPp	1
ECK120009613	lrhA	lrhA	lrhA	lrhAp	1
ECK120009372	lrp	lrp	lrp	lrpp	1
ECK120009376	lysA	lysA	lysA	lysAp	1
ECK120011141	lysP	lysP	lysP	lysPp	1
ECK120026744	lysQ	lysQ	lysQ		1
ECK120009377	lysR	lysR	lysR	lysRp	1
ECK120026743	lysZ	lysZ	lysZ		1
ECK120026653	maa	maa	maa		1
ECK120027325	maeB	maeB	maeB		1
ECK120021242	mak	mak	mak	makp4	1
ECK120009378	malI	malI	malI	malIp	1
ECK120009329	malS	malS	malS	malSp	1
ECK120009284	malT	malT	malT	malTp	1
ECK120009082	malZ	malZ	malZ	malZp	1
ECK120011061	manA	manA	manA	manAp	1
ECK120021241	marC	marC	marC	marCp	1
ECK120026594	matB	matB	matB	matBp5	1
ECK120021102	matP	matP	matP	matPp	1
ECK120026762	mcbA	mcbA	mcbA	mcbAp5	1
ECK120026972	mcbR	mcbR	mcbR	mcbRp3	1
ECK120027883	mdoB	mdoB	mdoB	opgBp7	1
ECK120021240	mdoC	mdoC	mdoC		1
ECK120026830	mdtG	mdtG	mdtG		1
ECK120026836	mdtH	mdtH	mdtH		1
ECK120027698	mdtL	mdtL	mdtL		1
ECK120027222	mdtQ	mdtQ	mdtQ		1
ECK120009233	melR	melR	melR	melRp	1
ECK120009382	metC	metC	metC	metCp	1
ECK120015513	metE	metE	metE	metEp	1
ECK120009408	metF	metF	metF	metFp	1
ECK120027209	metG	metG	metG	metGp	1
ECK120010896	metK	metK	metK	metKp	1
ECK120008976	mgrB	mgrB	mgrB	mgrBp	1
ECK125108716	mgrR	mgrR	mgrR	mgrRp	1
ECK120026806	mgsA	mgsA	mgsA	mgsAp	1
ECK120026613	mhpT	mhpT	mhpT	mhpTp	1
ECK120026726	miaB	miaB	miaB		1
ECK120020461	micA	micA	micA	micAp	1
ECK120021238	micC	micC	micC	micCp	1
ECK120008981	micF	micF	micF	micFp	1
ECK120020467	micM	micM	micM	micMp	1
ECK120027095	mipA	mipA	mipA	mipAp	1
ECK120020481	mlaA	mlaA	mlaA	mlaAp	1
ECK120027050	mliC	mliC	mliC		1
ECK120027427	mltA	mltA	mltA	mltAp6	1
ECK120027403	mltB	mltB	mltB		1
ECK120016181	mltF	mltF	mltF	mltFp	1
ECK120009594	mngR	mngR	mngR	mngRp	1
ECK120030187	mnmA	mnmA	mnmA	mnmAp	1
ECK120021237	mnmC	mnmC	mnmC		1
ECK120027697	mnmE	mnmE	mnmE		1
ECK120015315	mntH	mntH	mntH	mntHp	1
ECK120027115	mntP	mntP	mntP	mntPp	1
ECK125140764	mntS	mntS	mntS	mntSp	1
ECK120027464	mocA	mocA	mocA	mocAp9	1
ECK120026507	mog	mog	mog		1
ECK120026958	mokB	mokB	mokB	mokBp3	1
ECK120015374	molR_1	molR_1	molR_1	molR_1p	1
ECK120027210	molR_2	molR_2	molR_2		1
ECK120021236	mrcA	mrcA	mrcA	mrcAp	1
ECK120026535	mrcB	mrcB	mrcB	mrcBp	1
ECK120027587	mscL	mscL	mscL	mscLp	1
ECK120026694	mscM	mscM	mscM		1
ECK120027483	mscS	mscS	mscS	mscSp	1
ECK120009725	msrA	msrA	msrA	msrAp	1
ECK120027120	msrC	msrC	msrC		1
ECK120015508	msyB	msyB	msyB	msyBp	1
ECK120027163	mtfA	mtfA	mtfA	mtfAp1	1
ECK120021234	mug	mug	mug	mugp6	1
ECK120027566	murA	murA	murA		1
ECK120026837	murJ	murJ	murJ		1
ECK120027312	murR	murR	murR	murRp	1
ECK120009818	mutS	mutS	mutS	mutSp	1
ECK120009806	nac	nac	nac	nacp	1
ECK120009385	nadB	nadB	nadB	nadBp	1
ECK120026529	nadC	nadC	nadC	nadCp	1
ECK120027082	nadE	nadE	nadE	nadEp	1
ECK120027368	nadK	nadK	nadK	nadKp2	1
ECK120009023	nagE	nagE	nagE	nagEp	1
ECK120027867	nanS	nanS	nanS	nanSp1	1
ECK120021233	narP	narP	narP	narPp	1
ECK120029323	narQ	narQ	narQ	narQp	1
ECK120009349	ndh	ndh	ndh	ndhp	1
ECK120029324	ndk	ndk	ndk	ndkp4	1
ECK120027687	nepI	nepI	nepI	nepIp	1
ECK120009380	nfo	nfo	nfo	nfop	1
ECK120010963	nfsB	nfsB	nfsB	nfsBp	1
ECK120026878	nhaB	nhaB	nhaB	nhaBp7	1
ECK120021232	nhoA	nhoA	nhoA	nhoAp2	1
ECK120021231	nlpA	nlpA	nlpA	nlpAp	1
ECK120027561	nlpI	nlpI	nlpI	nlpIp2	1
ECK120009749	nmpC	nmpC	nmpC	nmpCp	1
ECK120026691	nohB	nohB	nohB		1
ECK120021228	nudG	nudG	nudG	nudGp3	1
ECK120021154	nudI	nudI	nudI	nudIp3	1
ECK120027327	nudK	nudK	nudK		1
ECK120009338	nupC	nupC	nupC	nupCp	1
ECK120027233	nupX	nupX	nupX		1
ECK120030179	ogrK	ogrK	ogrK	ogrKp5	1
ECK120032964	ohsC	ohsC	ohsC	ohsCp	1
ECK120009241	ompA	ompA	ompA	ompAp1	1
ECK120009243	ompF	ompF	ompF	ompFp	1
ECK120026916	ompG	ompG	ompG		1
ECK120027739	ompL	ompL	ompL	ompLp1	1
ECK120021227	ompW	ompW	ompW	ompWp	1
ECK120021186	omrA	omrA	omrA	omrAp	1
ECK120021185	omrB	omrB	omrB	omrBp	1
ECK120027823	orn	orn	orn	ornp5	1
ECK120009584	osmE	osmE	osmE	osmEp	1
ECK120008964	osmY	osmY	osmY	osmYp	1
ECK120009244	oxyR	oxyR	oxyR	oxyRp	1
ECK120020431	oxyS	oxyS	oxyS	oxySp	1
ECK120009758	paaZ	paaZ	paaZ	paaZp	1
ECK120027781	pagB	pagB	pagB		1
ECK120015338	pagP	pagP	pagP	pagPp	1
ECK120020432	panD	panD	panD	panDp	1
ECK120027511	parC	parC	parC	parCp4	1
ECK120027449	pbl	pbl	pbl		1
ECK120009333	pck	pck	pck	pckp	1
ECK120020433	pdxK	pdxK	pdxK	pdxKp1	1
ECK120027342	pepB	pepB	pepB		1
ECK120020434	pepE	pepE	pepE		1
ECK120020435	pepN	pepN	pepN	pepNp	1
ECK120020436	pepT	pepT	pepT	pepTp	1
ECK120026576	perR	perR	perR		1
ECK120026789	pflA	pflA	pflA	pflAp8	1
ECK120011126	pgi	pgi	pgi	pgip	1
ECK120015351	pgl	pgl	pgl	pglp2	1
ECK120029318	pgsA	pgsA	pgsA	pgsAp	1
ECK120015355	pheP	pheP	pheP	phePp	1
ECK120009701	pheU	pheU	pheU	pheUp	1
ECK120009683	pheV	pheV	pheV	pheVp	1
ECK120009279	phoE	phoE	phoE	phoEp	1
ECK120027385	pinH	pinH	pinH		1
ECK120027014	pinQ	pinQ	pinQ	pinQp1	1
ECK120026940	pinR	pinR	pinR	pinRp1	1
ECK120020437	pitA	pitA	pitA	pitAp	1
ECK120027500	pitB	pitB	pitB	pitBp	1
ECK120027180	plaP	plaP	plaP	yeeFp2	1
ECK120027722	pldA	pldA	pldA	pldAp	1
ECK120021113	pliG	pliG	pliG		1
ECK120029329	plsC	plsC	plsC		1
ECK120027838	pmbA	pmbA	pmbA	pmbAp	1
ECK120009386	pncB	pncB	pncB	pncBp	1
ECK120027402	pncC	pncC	pncC	pncCp	1
ECK120011157	polA	polA	polA	polAp	1
ECK120015327	polB	polB	polB	polBp	1
ECK120020438	ppa	ppa	ppa	ppap	1
ECK120011089	ppc	ppc	ppc	ppcp	1
ECK120010929	pphA	pphA	pphA	pphAp	1
ECK120027404	pphB	pphB	pphB	pphBp1	1
ECK120027710	ppiC	ppiC	ppiC	ppiCp	1
ECK120027496	pppA	pppA	pppA	pppAp3	1
ECK120009353	ppsA	ppsA	ppsA	ppsp	1
ECK120026987	pqqL	pqqL	pqqL		1
ECK120029336	priA	priA	priA		1
ECK120027598	prkB	prkB	prkB	prkBp	1
ECK120020439	proC	proC	proC	proCp	1
ECK120009700	proK	proK	proK	proKp	1
ECK120009676	proL	proL	proL	proLp	1
ECK120011052	proS	proS	proS	proSp	1
ECK120015177	prpR	prpR	prpR	prpRp	1
ECK120010903	psiE	psiE	psiE	psiEp	1
ECK120009099	pspG	pspG	pspG	pspGp	1
ECK120030159	psrD	psrD	sraB	psrDp	1
ECK120020462	psrO	psrO	psrO	psrOp	1
ECK120027129	ptrB	ptrB	ptrB	ptrBp	1
ECK120009287	purA	purA	purA	purAp	1
ECK120009248	purC	purC	purC	purCp	1
ECK120009250	purL	purL	purL	purLp	1
ECK120021032	purP	purP	purP		1
ECK120009252	purR	purR	purR	purRp	1
ECK120009748	putA	putA	putA	putAp	1
ECK120029310	puuA	puuA	puuA	puuAp	1
ECK120010960	puuP	puuP	puuP	puuPp	1
ECK120009253	pyrC	pyrC	pyrC	pyrCp	1
ECK120009254	pyrD	pyrD	pyrD	pyrDp	1
ECK120010878	pyrH	pyrH	pyrH	pyrHp	1
ECK120029339	qor	qor	qor	qorp	1
ECK120027869	qseD	qseD	qseD	qseDp4	1
ECK120011055	queA	queA	queA	queAp	1
ECK120026644	queC	queC	queC		1
ECK120027411	queD	queD	queD		1
ECK120016229	queE	queE	queE	queEp7	1
ECK120027422	queF	queF	queF	queFp	1
ECK120021041	queG	queG	queG	queGp	1
ECK120027362	raiA	raiA	raiA	raiAp	1
ECK120027262	rbn	rbn	rbn	rbnp4	1
ECK120027203	rcnR	rcnR	rcnR	rcnRp	1
ECK120009668	rcsA	rcsA	rcsA	rcsAp	1
ECK120020441	rdgC	rdgC	rdgC		1
ECK120020442	rdlA	rdlA	rdlA	rdlAp5	1
ECK120020443	rdlB	rdlB	rdlB	rdlBp4	1
ECK120020444	rdlC	rdlC	rdlC	rdlCp3	1
ECK120027650	rdlD	rdlD	rdlD	rdlDp	1
ECK120015766	recN	recN	recN	recNp	1
ECK120009133	rep	rep	rep	rep	1
ECK120027527	rfaE	rfaE	rfaE	rfaEp1	1
ECK120030126	rhaM	rhaM	rhaM		1
ECK120009399	rhaT	rhaT	rhaT	rhaTp	1
ECK120027713	rhlB	rhlB	rhlB		1
ECK120020446	rhlE	rhlE	rhlE	rhlEp5	1
ECK120026764	rhtA	rhtA	rhtA	rhtAp8	1
ECK120020447	rhtB	rhtB	rhtB		1
ECK120027724	rhtC	rhtC	rhtC	rhtCp2	1
ECK120020450	ribC	ribC	ribC	ribCp5	1
ECK120027840	ridA	ridA	ridA	ridAp	1
ECK120026722	rihA	rihA	rihA	rihAp3	1
ECK120011120	rihB	rihB	rihB	rihBp	1
ECK120026514	rihC	rihC	rihC		1
ECK120015523	rimJ	rimJ	rimJ	rimJp	1
ECK120009124	rimL	rimL	rimL	rimLp	1
ECK120021061	rimO	rimO	rimO	rimOp	1
ECK120027116	rlmA	rlmA	rlmA	rlmAp9	1
ECK120027419	rlmD	rlmD	rlmD	rlmDp	1
ECK120027535	rlmG	rlmG	rlmG	rlmGp4	1
ECK120026809	rlmI	rlmI	rlmI	rlmIp4	1
ECK120030136	rlmM	rlmM	rlmM		1
ECK120027337	rlmN	rlmN	rlmN		1
ECK120026899	rluB	rluB	rluB		1
ECK120026839	rluC	rluC	rluC		1
ECK120027727	rmuC	rmuC	rmuC		1
ECK120026705	rna	rna	rna	rnap	1
ECK120030180	rnd	rnd	rnd	rndp	1
ECK120009166	rnhA	rnhA	rnhA	rnhAp	1
ECK120015337	rob	rob	rob	robp	1
ECK120015316	rpiA	rpiA	rpiA	rpiAp	1
ECK120009028	rpiB	rpiB	rpiB	rpiBp	1
ECK120020452	rpmE	rpmE	rpmE	rpmEp	1
ECK120027066	rprA	rprA	rprA	rprAp	1
ECK120010951	rseP	rseP	rseP	rsePp	1
ECK120030158	rseX	rseX	rseX	rseXp	1
ECK120027822	rsgA	rsgA	rsgA	rsgAp12	1
ECK120030181	rsmB	rsmB	rsmB	rsmBp4	1
ECK120027122	rsmF	rsmF	rsmF		1
ECK120016219	rtcR	rtcR	rtcR	rtcRp	1
ECK120027241	rtn	rtn	rtn	rtnp1	1
ECK120026886	rttR	rttR	rttR		1
ECK120026776	rybB	rybB	rybB	rybBp	1
ECK120030632	rydC	rydC	rydC	rydCp	1
ECK120020454	ryeA	ryeA	sraC	ryeAp	1
ECK120027340	ryfA	ryfA	ryfA	ryfAp11	1
ECK120032966	ryfD	ryfD	ryfD	ryfDp	1
ECK120010922	ryhB	ryhB	ryhB	ryhBp	1
ECK120020465	ryjA	ryjA	ryjA	ryjAp	1
ECK120032967	ryjB	ryjB	ryjB	ryjBp	1
ECK120026688	rzoD	rzoD	rzoD		1
ECK120026935	rzoR	rzoR	rzoR		1
ECK120027002	sad	sad	sad	sadp5	1
ECK120009134	sbcB	sbcB	sbcB	sbcBp	1
ECK120027755	sbp	sbp	sbp		1
ECK120009413	sdaA	sdaA	sdaA	sdaAp	1
ECK120027125	sdsR	sdsR	ryeB	ryeBp	1
ECK120027684	selC	selC	selC	selCp	1
ECK120026786	serS	serS	serS	serSp	1
ECK120009691	serT	serT	serT	serTp	1
ECK120009695	serU	serU	serU	serUp	1
ECK120009690	serW	serW	serW	serWp	1
ECK120009692	serX	serX	serX	serXp	1
ECK120027166	shiA	shiA	shiA	shiAp11	1
ECK120027192	sibA	sibA	sibA	sibAp	1
ECK120027193	sibB	sibB	sibB	sibBp	1
ECK120035097	sibC	sibC	sibC	sibCp	1
ECK120027526	sibD	sibD	sibD	sibDp	1
ECK120035096	sibE	sibE	sibE	sibEp	1
ECK120020455	sieB	sieB	sieB		1
ECK120010932	sixA	sixA	sixA	sixAp	1
ECK120027897	slt	slt	slt	sltp7	1
ECK120020458	slyX	slyX	slyX	slyXp4	1
ECK120015155	smf	smf	smf	smfp	1
ECK120029518	smg	smg	smg		1
ECK120027371	smpB	smpB	smpB	smpBp5	1
ECK120021120	smrA	smrA	smrA	smrAp1	1
ECK120009257	sodA	sodA	sodA	sodAp	1
ECK120011062	sodB	sodB	sodB	sodBp	1
ECK120027052	sodC	sodC	sodC	sodCp	1
ECK120026959	sokB	sokB	sokB	sokBp3	1
ECK120026512	sokC	sokC	sokC		1
ECK120009640	soxR	soxR	soxR	soxRp	1
ECK120009402	soxS	soxS	soxS	soxSp	1
ECK120009316	speC	speC	speC	speCp	1
ECK120011087	spf	spf	spf	spfp	1
ECK120027087	sppA	sppA	sppA	sppAp6	1
ECK120027240	spr	spr	spr	sprp	1
ECK120016547	spy	spy	spy	spyp	1
ECK120020460	sraA	sraA	sraA		1
ECK120020466	srmB	srmB	srmB	srmBp4	1
ECK120027774	sroH	sroH	sroH	sroHp	1
ECK120020471	sseA	sseA	sseA	sseAp	1
ECK120027341	sseB	sseB	sseB		1
ECK120027372	ssrA	ssrA	ssrA	ssrAp2	1
ECK120027540	sstT	sstT	sstT	sstTp	1
ECK120015324	sthA	sthA	sthA	sthAp	1
ECK120008943	sugE	sugE	sugE	sugEp	1
ECK120027344	suhB	suhB	suhB		1
ECK120009259	sulA	sulA	sulA	sulAp	1
ECK120021104	sxy	sxy	sxy		1
ECK120027421	syd	syd	syd	sydp2	1
ECK120015366	symE	symE	symE	symEp	1
ECK120032963	symR	symR	symR	symRp	1
ECK120015352	talB	talB	talB	talBp	1
ECK120027434	tas	tas	tas	tasp4	1
ECK120026711	tatE	tatE	tatE	tatEp3	1
ECK120020473	tesB	tesB	tesB	tesBp	1
ECK120026692	tfaD	tfaD	tfaD		1
ECK120027291	tfaS	tfaS	tfaS		1
ECK120026693	tfaX	tfaX	tfaX		1
ECK120020474	thiI	thiI	thiI	thiIp	1
ECK120009672	thrW	thrW	thrW	thrWp	1
ECK120026548	tilS	tilS	tilS		1
ECK120009117	tisB	tisB	tisB	tisBp	1
ECK120029328	tktA	tktA	tktA	tktAp1	1
ECK120009358	tonB	tonB	tonB	tonBp	1
ECK120027296	torI	torI	torI		1
ECK120009825	torR	torR	torR	torRp	1
ECK120029308	torS	torS	torS	torSp5	1
ECK120020475	tp2	tp2	tp2		1
ECK120027300	tpke70	tpke70	tpke70		1
ECK120020425	tppB	tppB	tppB	tppBp	1
ECK120011140	tpx	tpx	tpx	tpxp	1
ECK120020476	tqsA	tqsA	tqsA	tqsAp	1
ECK120009582	treA	treA	treA	treAp	1
ECK120016331	treF	treF	treF	treFp	1
ECK120034136	trg	trg	trg	trgp1	1
ECK120027586	trkA	trkA	trkA	trkAp	1
ECK120009615	trmA	trmA	trmA	trmAp	1
ECK120027343	trmJ	trmJ	trmJ		1
ECK120027671	trmL	trmL	trmL		1
ECK120009410	trpR	trpR	trpR	trpRp	1
ECK120030194	trpT	trpT	trpT	trpTp2	1
ECK120030143	truD	truD	truD		1
ECK120026784	trxB	trxB	trxB	trxBp	1
ECK120010913	trxC	trxC	trxC	trxCp	1
ECK120027600	tsgA	tsgA	tsgA	tsgAp	1
ECK120026928	ttcA	ttcA	ttcA	ttcAp5	1
ECK120021180	ttdR	ttdR	ttdR	ttdRp	1
ECK120027042	tus	tus	tus	tusp2	1
ECK120020456	tusA	tusA	tusA	tusAp7	1
ECK120026810	tusE	tusE	tusE		1
ECK120026945	tynA	tynA	tynA	tynAp	1
ECK120009280	tyrB	tyrB	tyrB	tyrBp	1
ECK120020477	ubiF	ubiF	ubiF		1
ECK120009318	ubiG	ubiG	ubiG	ubiGp	1
ECK120009326	udp	udp	udp	udpP	1
ECK120027185	ugd	ugd	ugd	ugdp9	1
ECK120009322	uhpT	uhpT	uhpT	uhpTp	1
ECK120009068	uidR	uidR	uidR	uidRp	1
ECK120009071	ulaG	ulaG	ulaG	ulaGp	1
ECK120027829	ulaR	ulaR	ulaR	ulaRp5	1
ECK120009135	ung	ung	ung	ungp	1
ECK120020478	ushA	ushA	ushA	ushAp6	1
ECK120010881	uspB	uspB	uspB	uspBp	1
ECK120026924	uspE	uspE	uspE	uspEp	1
ECK120026942	uspF	uspF	uspF	uspFp	1
ECK120020480	uspG	uspG	uspG	uspGp	1
ECK120009262	uvrA	uvrA	uvrA	uvrAp	1
ECK120009063	uxuR	uxuR	uxuR	uxuRp	1
ECK120015318	ves	ves	ves	vesp	1
ECK120027187	wbbL_2	wbbL_2	wbbL_2		1
ECK120021021	wecH	wecH	wecH		1
ECK120011151	xseA	xseA	xseA	xseAp	1
ECK120011154	xthA	xthA	xthA	xthAp	1
ECK120026508	yaaH	yaaH	yaaH		1
ECK120026506	yaaJ	yaaJ	yaaJ	yaaJp4	1
ECK120026516	yaaU	yaaU	yaaU	yaaUp	1
ECK120026509	yaaW	yaaW	yaaW	yaaWp3	1
ECK120026504	yaaX	yaaX	yaaX	yaaXp4	1
ECK120026521	yabI	yabI	yabI	yabIp	1
ECK120026530	yacL	yacL	yacL	yacLp	1
ECK120029299	yadI	yadI	yadI		1
ECK120026551	yaeF	yaeF	yaeF	yaeFp1	1
ECK120026540	yaeH	yaeH	yaeH		1
ECK120026541	yaeI	yaeI	yaeI		1
ECK120026547	yaeR	yaeR	yaeR	yaeRp3	1
ECK120020485	yafC	yafC	yafC	yafCp6	1
ECK120020486	yafF	yafF	yafF		1
ECK120026562	yafJ	yafJ	yafJ		1
ECK120026563	yafK	yafK	yafK	yafKp6	1
ECK120026565	yafL	yafL	yafL	yafLp6	1
ECK120020487	yafS	yafS	yafS	yafSp2	1
ECK120020488	yafU	yafU	yafU	yafUp	1
ECK120020489	yafV	yafV	yafV	yafVp	1
ECK120026584	yagI	yagI	yagI	yagIp1	1
ECK120020490	yagJ	yagJ	yagJ		1
ECK120026586	yagK	yagK	yagK	yagKp6	1
ECK120026590	yagP	yagP	yagP		1
ECK120020491	yagU	yagU	yagU		1
ECK120026604	yahB	yahB	yahB		1
ECK120026605	yahC	yahC	yahC	yahCp5	1
ECK120026607	yahH	yahH	yahH		1
ECK120029301	yahK	yahK	yahK		1
ECK120026609	yahL	yahL	yahL		1
ECK120020493	yahO	yahO	yahO	yahOp	1
ECK120026628	yaiE	yaiE	yaiE	yaiEp	1
ECK120026618	yaiF	yaiF	yaiF		1
ECK120026614	yaiL	yaiL	yaiL		1
ECK120026619	yaiP	yaiP	yaiP	yaiPp5	1
ECK120020494	yaiT	yaiT	yaiT		1
ECK120026624	yaiU	yaiU	yaiU		1
ECK120026625	yaiV	yaiV	yaiV	yaiVp4	1
ECK120026639	yajG	yajG	yajG		1
ECK120026633	yajI	yajI	yajI	yajIp6	1
ECK120020499	yajQ	yajQ	yajQ	yajQp	1
ECK120026637	yajR	yajR	yajR	yajRp	1
ECK120026650	ybaA	ybaA	ybaA		1
ECK120026645	ybaE	ybaE	ybaE		1
ECK120020500	ybaK	ybaK	ybaK		1
ECK120026662	ybaL	ybaL	ybaL	ybaLp	1
ECK120026647	ybaO	ybaO	ybaO	ybaOp	1
ECK120026642	ybaV	ybaV	ybaV	ybaVp3	1
ECK120020496	ybaY	ybaY	ybaY	ybaYp3	1
ECK120026679	ybcC	ybcC	ybcC		1
ECK120026680	ybcD	ybcD	ybcD		1
ECK120030188	ybcH	ybcH	ybcH	ybcHp4	1
ECK120026674	ybcI	ybcI	ybcI	ybcIp5	1
ECK120026686	ybcQ	ybcQ	ybcQ	quuDp3	1
ECK120026689	ybcV	ybcV	ybcV		1
ECK120020501	ybcY	ybcY	ybcY		1
ECK120026700	ybdD	ybdD	ybdD	ybdDp2	1
ECK120026696	ybdF	ybdF	ybdF	ybdFp5	1
ECK120026698	ybdK	ybdK	ybdK	ybdKp3	1
ECK120020503	ybdL	ybdL	ybdL	ybdLp3	1
ECK120026701	ybdM	ybdM	ybdM	ybdMp2	1
ECK120026702	ybdN	ybdN	ybdN	ybdNp	1
ECK120026703	ybdO	ybdO	ybdO		1
ECK120029340	ybdR	ybdR	ybdR	ybdRp6	1
ECK120020504	ybeL	ybeL	ybeL	ybeLp	1
ECK120020506	ybeT	ybeT	ybeT	ybeTp8	1
ECK120026738	ybfD	ybfD	ybfD		1
ECK120015367	ybfE	ybfE	ybfE	ybfEp	1
ECK120026731	ybfF	ybfF	ybfF	ybfFp1	1
ECK120026737	ybfL	ybfL	ybfL		1
ECK120026732	ybfP	ybfP	ybfP		1
ECK120026736	ybfQ	ybfQ	ybfQ		1
ECK120026741	ybgD	ybgD	ybgD	ybgDp9	1
ECK120030190	ybgE	ybgE	ybgE	ybgEp4	1
ECK120030189	ybgT	ybgT	ybgT	ybgTp3	1
ECK120026751	ybhC	ybhC	ybhC	ybhCp	1
ECK120029306	ybhI	ybhI	ybhI		1
ECK120029307	ybhJ	ybhJ	ybhJ		1
ECK120009120	ybhK	ybhK	ybhK	ybhKp	1
ECK120026753	ybhL	ybhL	ybhL		1
ECK120026754	ybhM	ybhM	ybhM	ybhMp7	1
ECK120020510	ybhQ	ybhQ	ybhQ	ybhQp	1
ECK120026749	ybhT	ybhT	ybhT		1
ECK120020511	ybiA	ybiA	ybiA	ybiAp6	1
ECK120030191	ybiB	ybiB	ybiB		1
ECK120026757	ybiC	ybiC	ybiC		1
ECK120026759	ybiI	ybiI	ybiI	ybiIp6	1
ECK120026758	ybiJ	ybiJ	ybiJ		1
ECK120020513	ybiP	ybiP	ybiP	ybiPp5	1
ECK120016180	ybiS	ybiS	ybiS	ybisp	1
ECK120020449	ybiT	ybiT	ybiT	ybiTp	1
ECK120026767	ybiV	ybiV	ybiV	ybiVp5	1
ECK120026760	ybiX	ybiX	ybiX	ybiXp2	1
ECK120021096	ybjD	ybjD	ybjD		1
ECK120015492	ybjG	ybjG	ybjG	ybjGp	1
ECK120026774	ybjH	ybjH	ybjH		1
ECK120021097	ybjK	ybjK	ybjK		1
ECK120015510	ybjP	ybjP	ybjP	ybjPp	1
ECK120026780	ybjS	ybjS	ybjS	ybjSp3	1
ECK120020459	ybjX	ybjX	ybjX	ybjXp	1
ECK120016548	ycaC	ycaC	ycaC		1
ECK120021100	ycaN	ycaN	ycaN		1
ECK120026790	ycaO	ycaO	ycaO		1
ECK120026791	ycaP	ycaP	ycaP		1
ECK120026796	ycbB	ycbB	ycbB	ycbBp	1
ECK120021101	ycbC	ycbC	ycbC		1
ECK120026795	ycbJ	ycbJ	ycbJ	ycbJp	1
ECK120021103	ycbX	ycbX	ycbX		1
ECK120026804	ycbZ	ycbZ	ycbZ	ycbZp4	1
ECK120026811	yccA	yccA	yccA	yccAp	1
ECK120026818	yccE	yccE	yccE	yccEp	1
ECK120026817	yccM	yccM	yccM		1
ECK120021105	yccU	yccU	yccU		1
ECK120021107	ycdT	ycdT	ycdT	ycdTp	1
ECK120026826	ycdZ	ycdZ	ycdZ	ycdZp4	1
ECK120009188	yceA	yceA	yceA	yceAp	1
ECK120026834	yceB	yceB	yceB		1
ECK120026829	yceK	yceK	yceK		1
ECK120030176	yceM	yceM	yceM	yceMp4	1
ECK120026838	yceQ	yceQ	yceQ	yceQp6	1
ECK120026842	ycfJ	ycfJ	ycfJ	ycfJp3	1
ECK120026843	ycfS	ycfS	ycfS	ycfSp	1
ECK120021111	ycgB	ycgB	ycgB	ycgBp	1
ECK120026863	ycgE	ycgE	ycgE	ycgEp	1
ECK120026864	ycgF	ycgF	ycgF	ycgFp7	1
ECK120026868	ycgG	ycgG	ycgG	ycgGp7	1
ECK120026870	ycgH_1	ycgH_1	ycgH_1		1
ECK120026871	ycgH_2	ycgH_2	ycgH_2		1
ECK120021112	ycgJ	ycgJ	ycgJ	ycgJp5	1
ECK120026874	ycgL	ycgL	ycgL	ycgLp	1
ECK120026875	ycgM	ycgM	ycgM		1
ECK120010893	ycgR	ycgR	ycgR	ycgRp	1
ECK120026889	ychE	ychE	ychE	ychEp8	1
ECK120021114	ychH	ychH	ychH	ychHp	1
ECK120026887	ychJ	ychJ	ychJ	ychJp	1
ECK120026884	ychM	ychM	ychM		1
ECK120021115	ychN	ychN	ychN	ychNp4	1
ECK120021116	ychO	ychO	ychO	ychOp	1
ECK120026885	ychS	ychS	ychS		1
ECK120026893	yciA	yciA	yciA	yciAp8	1
ECK120026892	yciI	yciI	yciI	yciIp	1
ECK120026907	yciW	yciW	yciW	yciWp4	1
ECK120027914	yciY	yciY	yciY		1
ECK120021118	ycjG	ycjG	ycjG	ycjGp	1
ECK120021119	ycjW	ycjW	ycjW	ycjWp2	1
ECK120026919	ycjY	ycjY	ycjY	ycjYp6	1
ECK120026920	ycjZ	ycjZ	ycjZ	ycjZp7	1
ECK120021121	ydaM	ydaM	ydaM		1
ECK120026926	ydaN	ydaN	ydaN	ydaNp	1
ECK120026946	ydbA_1	ydbA_1	ydbA_1		1
ECK120026949	ydbA_2	ydbA_2	ydbA_2		1
ECK120026950	ydbC	ydbC	ydbC	ydbCp1	1
ECK120026951	ydbD	ydbD	ydbD	ydbDp	1
ECK120026978	ydcC	ydcC	ydcC		1
ECK120026962	ydcH	ydcH	ydcH		1
ECK120021125	ydcK	ydcK	ydcK	ydcKp8	1
ECK120027913	ydcM	ydcM	ydcM		1
ECK120026964	ydcN	ydcN	ydcN	ydcNp5	1
ECK120021126	ydcO	ydcO	ydcO		1
ECK120026965	ydcP	ydcP	ydcP	ydcPp2	1
ECK120026967	ydcR	ydcR	ydcR	ydcRp	1
ECK120026970	ydcY	ydcY	ydcY	ydcYp3	1
ECK120026980	yddE	yddE	yddE	yddEp5	1
ECK120026983	yddG	yddG	yddG	yddGp	1
ECK120021127	yddH	yddH	yddH		1
ECK120026984	yddM	yddM	yddM		1
ECK120026986	yddW	yddW	yddW	yddWp6	1
ECK120010885	ydeA	ydeA	ydeA	ydeAp	1
ECK120027006	ydeH	ydeH	ydeH	ydeHp	1
ECK120021130	ydeJ	ydeJ	ydeJ	ydeJp	1
ECK120026995	ydeK	ydeK	ydeK		1
ECK120026989	ydeM	ydeM	ydeM		1
ECK120015478	ydeP	ydeP	ydeP	ydePp	1
ECK120026991	ydeQ	ydeQ	ydeQ	ydeQp	1
ECK120026994	ydeU	ydeU	ydeU		1
ECK120027008	ydfG	ydfG	ydfG	ydfGp	1
ECK120027009	ydfH	ydfH	ydfH	ydfHp	1
ECK120027011	ydfI	ydfI	ydfI		1
ECK120027012	ydfJ	ydfJ	ydfJ		1
ECK120027024	ydfV	ydfV	ydfV		1
ECK120027010	ydfZ	ydfZ	ydfZ		1
ECK120027044	ydgA	ydgA	ydgA	ydgAp	1
ECK120021131	ydgC	ydgC	ydgC	ydgCp3	1
ECK120027040	ydgH	ydgH	ydgH	ydgHp5	1
ECK120021132	ydgJ	ydgJ	ydgJ	ydgJp6	1
ECK120015951	ydhB	ydhB	ydhB	ydhBp2	1
ECK120027054	ydhL	ydhL	ydhL	ydhLp3	1
ECK120027055	ydhO	ydhO	ydhO	ydhOp	1
ECK120015952	ydhP	ydhP	ydhP		1
ECK120021133	ydhQ	ydhQ	ydhQ	ydhQp	1
ECK120027057	ydhR	ydhR	ydhR		1
ECK120027072	ydiE	ydiE	ydiE	ydiEp5	1
ECK120027065	ydiK	ydiK	ydiK		1
ECK120027067	ydiL	ydiL	ydiL		1
ECK120021134	ydiP	ydiP	ydiP	ydiPp	1
ECK120020536	ydiU	ydiU	ydiU	ydiUp	1
ECK120027077	ydiZ	ydiZ	ydiZ		1
ECK120015363	ydjM	ydjM	ydjM	ydjMp	1
ECK120027080	ydjN	ydjN	ydjN		1
ECK120027091	yeaC	yeaC	yeaC		1
ECK120027094	yeaE	yeaE	yeaE	yeaEp	1
ECK120027097	yeaJ	yeaJ	yeaJ	yeaJp6	1
ECK120027098	yeaK	yeaK	yeaK		1
ECK120021136	yeaL	yeaL	yeaL	yeaLp	1
ECK125135749	yeaP	yeaP	yeaP	yeaPp3	1
ECK120027107	yeaX	yeaX	yeaX		1
ECK120027130	yebE	yebE	yebE	yebEp	1
ECK120027131	yebF	yebF	yebF		1
ECK120027132	yebG	yebG	yebG	yebGp	1
ECK120027133	yebK	yebK	yebK	yebKp2	1
ECK120027118	yebO	yebO	yebO		1
ECK120027143	yecA	yecA	yecA		1
ECK120021140	yecF	yecF	yecF	yecFp	1
ECK120027140	yecJ	yecJ	yecJ	yecJp4	1
ECK120016590	yecR	yecR	yecR	yecRp	1
ECK120027138	yecT	yecT	yecT	yecTp3	1
ECK120021142	yedA	yedA	yedA		1
ECK120021143	yedD	yedD	yedD	yedDp5	1
ECK120027148	yedK	yedK	yedK		1
ECK120027149	yedL	yedL	yedL		1
ECK120027151	yedM	yedM	yedM		1
ECK120021144	yedP	yedP	yedP		1
ECK120027152	yedQ	yedQ	yedQ		1
ECK120027157	yedS_3	yedS_3	yedS_3		1
ECK120027160	yedX	yedX	yedX	hiuHp6	1
ECK120027176	yeeA	yeeA	yeeA	yeeAp6	1
ECK120027164	yeeJ	yeeJ	yeeJ	yeeJp8	1
ECK120027172	yeeP	yeeP	yeeP		1
ECK120027175	yeeX	yeeX	yeeX	yeeXp4	1
ECK120027181	yeeY	yeeY	yeeY		1
ECK120021145	yegD	yegD	yegD	yegDp2	1
ECK120021146	yegE	yegE	yegE		1
ECK120021147	yegH	yegH	yegH	yegHp	1
ECK120027194	yegP	yegP	yegP		1
ECK120027195	yegQ	yegQ	yegQ	yegQp1	1
ECK120027200	yegW	yegW	yegW	yegWp	1
ECK120027212	yehK	yehK	yehK	yehKp1	1
ECK120027214	yehR	yehR	yehR	yehRp	1
ECK120027215	yehS	yehS	yehS	yehSp	1
ECK120021150	yeiG	yeiG	yeiG	yeiGp6	1
ECK120027232	yeiH	yeiH	yeiH	yeiHp7	1
ECK120030134	yeiI	yeiI	yeiI	yeiIp2	1
ECK120027235	yeiM	yeiM	yeiM	psuTp2	1
ECK120027237	yeiP	yeiP	yeiP	yeiPp	1
ECK120027245	yejH	yejH	yejH	yejHp	1
ECK120021151	yejK	yejK	yejK	yejKp5	1
ECK120016591	yejO	yejO	yejO	yejOp	1
ECK120021152	yfaH	yfaH	yfaH		1
ECK120027256	yfaY	yfaY	yfaY	yfaYp	1
ECK120027265	yfbM	yfbM	yfbM		1
ECK120027267	yfbP	yfbP	yfbP	yfbPp7	1
ECK120027270	yfbS	yfbS	yfbS		1
ECK120027272	yfbV	yfbV	yfbV		1
ECK120027273	yfcC	yfcC	yfcC		1
ECK120027274	yfcD	yfcD	yfcD	yfcDp	1
ECK120027275	yfcE	yfcE	yfcE	yfcEp	1
ECK120027276	yfcF	yfcF	yfcF		1
ECK120027277	yfcG	yfcG	yfcG		1
ECK120027281	yfcJ	yfcJ	yfcJ	yfcJp2	1
ECK120027286	yfcZ	yfcZ	yfcZ	yfcZp	1
ECK120027288	yfdC	yfdC	yfdC		1
ECK120027297	yfdE	yfdE	yfdE		1
ECK120027298	yfdV	yfdV	yfdV		1
ECK120015484	yfdX	yfdX	yfdX	yfdXp	1
ECK120021160	yfeN	yfeN	yfeN		1
ECK120027304	yfeO	yfeO	yfeO	yfeOp1	1
ECK120021161	yfeR	yfeR	yfeR	yfeRp1	1
ECK120027317	yffL	yffL	yffL		1
ECK120027321	yffS	yffS	yffS	yffSp4	1
ECK120021162	yfgF	yfgF	yfgF	yfgFp	1
ECK120027336	yfgJ	yfgJ	yfgJ		1
ECK120021163	yfgO	yfgO	yfgO		1
ECK120030148	yfhG	yfhG	yfhG		1
ECK120027353	yfhH	yfhH	yfhH	yfhHp5	1
ECK120027354	yfhL	yfhL	yfhL	yfhLp	1
ECK120021164	yfiC	yfiC	yfiC	yfiCp3	1
ECK120008925	yfiD	yfiD	yfiD	yfiDp	1
ECK120021165	yfiE	yfiE	yfiE	yfiEp7	1
ECK120021166	yfiF	yfiF	yfiF		1
ECK120027358	yfiM	yfiM	yfiM	yfiMp2	1
ECK120027367	yfjD	yfjD	yfjD		1
ECK120027375	yfjJ	yfjJ	yfjJ	yfjJp6	1
ECK120027377	yfjM	yfjM	yfjM	yfjMp3	1
ECK120027382	yfjW	yfjW	yfjW	yfjWp5	1
ECK120010923	ygaC	ygaC	ygaC	ygaCp	1
ECK120027395	ygaM	ygaM	ygaM	ygaMp	1
ECK120027390	ygaQ_3	ygaQ_3	ygaQ_3		1
ECK120027391	ygaQ_4	ygaQ_4	ygaQ_4		1
ECK120027392	ygaU	ygaU	ygaU	ygaUp4	1
ECK120016778	ygbA	ygbA	ygbA	ygbAp	1
ECK120027408	ygbE	ygbE	ygbE	ygbEp3	1
ECK120027407	ygbN	ygbN	ygbN	ygbNp2	1
ECK120027414	ygcS	ygcS	ygcS		1
ECK120027415	ygcU	ygcU	ygcU	ygcUp5	1
ECK120030137	ygdD	ygdD	ygdD	ygdDp2	1
ECK120027424	ygdG	ygdG	ygdG	ygdGp2	1
ECK120027423	ygdH	ygdH	ygdH		1
ECK120027432	ygdQ	ygdQ	ygdQ	ygdQp3	1
ECK120027433	ygdR	ygdR	ygdR	ygdRp5	1
ECK120027438	ygeA	ygeA	ygeA	ygeAp5	1
ECK120027445	ygeF	ygeF	ygeF		1
ECK120027446	ygeG	ygeG	ygeG		1
ECK120027447	ygeH	ygeH	ygeH	ygeHp10	1
ECK120027452	ygeP	ygeP	ygeP		1
ECK120027453	ygeQ	ygeQ	ygeQ		1
ECK120027455	ygeR	ygeR	ygeR	ygeRp1	1
ECK120021172	ygeV	ygeV	ygeV	ygeVp	1
ECK120027458	ygeX	ygeX	ygeX		1
ECK120027459	ygeY	ygeY	ygeY		1
ECK120027474	ygfF	ygfF	ygfF		1
ECK120027481	ygfI	ygfI	ygfI		1
ECK120027468	ygfU	ygfU	ygfU	ygfUp6	1
ECK120021173	ygfZ	ygfZ	ygfZ	ygfZp	1
ECK120027905	yggG	yggG	yggG	yggGp	1
ECK120021174	yggR	yggR	yggR		1
ECK120027902	yghA	yghA	yghA	yghAp5	1
ECK120027504	yghB	yghB	yghB	yghBp	1
ECK120010952	yghF	yghF	yghF	yghFp	1
ECK120027495	yghG	yghG	yghG		1
ECK120027903	yghO	yghO	yghO		1
ECK120021176	yghU	yghU	yghU	yghUp	1
ECK120027502	yghW	yghW	yghW	yghWp6	1
ECK120021177	yghZ	yghZ	yghZ	gprp1	1
ECK120021179	ygiH	ygiH	ygiH	plsYp5	1
ECK120027517	ygiN	ygiN	ygiN	ygiNp2	1
ECK120027512	ygiS	ygiS	ygiS	ygiSp4	1
ECK120021181	ygiZ	ygiZ	ygiZ	ygiZp3	1
ECK120010920	ygjG	ygjG	ygjG	ygjGp	1
ECK120027536	ygjP	ygjP	ygjP		1
ECK120027538	ygjR	ygjR	ygjR	ygjRp	1
ECK120027541	ygjV	ygjV	ygjV	ygjVp4	1
ECK120021006	yhbO	yhbO	yhbO		1
ECK120021007	yhbP	yhbP	yhbP		1
ECK120021008	yhbQ	yhbQ	yhbQ	yhbQp2	1
ECK120027559	yhbW	yhbW	yhbW		1
ECK120027562	yhbX	yhbX	yhbX	yhbXp6	1
ECK120021009	yhbY	yhbY	yhbY	yhbYp	1
ECK120027576	yhcB	yhcB	yhcB	yhcBp	1
ECK120027573	yhcG	yhcG	yhcG		1
ECK120027583	yhdJ	yhdJ	yhdJ	yhdJp2	1
ECK120027582	yhdP	yhdP	yhdP		1
ECK120027584	yhdU	yhdU	yhdU	yhdUp1	1
ECK120027585	yhdV	yhdV	yhdV	yhdVp9	1
ECK120009660	yhfA	yhfA	yhfA	yhfAp	1
ECK120030138	yhfK	yhfK	yhfK	yhfKp	1
ECK120027610	yhgA	yhgA	yhgA	yhgAp6	1
ECK120029333	yhgF	yhgF	yhgF	yhgFp2	1
ECK120021012	yhgN	yhgN	yhgN		1
ECK120027626	yhhH	yhhH	yhhH		1
ECK120027628	yhhI	yhhI	yhhI	yhhIp6	1
ECK120027621	yhhQ	yhhQ	yhhQ	yhhQp5	1
ECK120021016	yhhS	yhhS	yhhS		1
ECK120027623	yhhT	yhhT	yhhT	yhhTp4	1
ECK120027613	yhhW	yhhW	yhhW		1
ECK120015474	yhhY	yhhY	yhhY	yhhYp	1
ECK120027630	yhiJ	yhiJ	yhiJ	yhiJp6	1
ECK120027631	yhiK	yhiK	yhiK		1
ECK120027632	yhiL	yhiL	yhiL	yhiLp	1
ECK120021018	yhiN	yhiN	yhiN	yhiNp6	1
ECK120027635	yhiR	yhiR	yhiR	yhiRp	1
ECK120027637	yhiS_1	yhiS_1	yhiS_1		1
ECK120027642	yhjA	yhjA	yhjA	yhjAp	1
ECK120021019	yhjB	yhjB	yhjB	yhjBp4	1
ECK120027643	yhjC	yhjC	yhjC	yhjCp	1
ECK120027644	yhjD	yhjD	yhjD	yhjDp5	1
ECK120027646	yhjG	yhjG	yhjG	yhjGp	1
ECK120010894	yhjH	yhjH	yhjH	yhjHp	1
ECK120016694	yhjJ	yhjJ	yhjJ	yhjJp	1
ECK120027648	yhjK	yhjK	yhjK	yhjKp2	1
ECK120027651	yhjV	yhjV	yhjV	yhjVp3	1
ECK120027654	yhjY	yhjY	yhjY	yhjYp9	1
ECK120027659	yiaA	yiaA	yiaA	yiaAp	1
ECK120021020	yiaF	yiaF	yiaF	yiaFp	1
ECK120015506	yiaG	yiaG	yiaG	yiaGp	1
ECK120009756	yiaJ	yiaJ	yiaJ	yiaJp	1
ECK120027676	yibD	yibD	yibD	yibDp1	1
ECK120027665	yibF	yibF	yibF	yibFp	1
ECK120027668	yibG	yibG	yibG	yibGp6	1
ECK120027667	yibJ	yibJ	yibJ		1
ECK120027670	yibL	yibL	yibL	yibLp6	1
ECK120027674	yibN	yibN	yibN	yibNp7	1
ECK120027678	yicC	yicC	yicC	yicCp	1
ECK120027680	yicG	yicG	yicG		1
ECK120027683	yicH	yicH	yicH	yicHp	1
ECK120027686	yicL	yicL	yicL		1
ECK120027688	yicN	yicN	yicN	yicNp4	1
ECK120021025	yicS	yicS	yicS		1
ECK120027695	yidA	yidA	yidA		1
ECK120027696	yidB	yidB	yidB	yidBp3	1
ECK120027693	yidE	yidE	yidE	yidEp6	1
ECK120021026	yidI	yidI	yidI		1
ECK120021027	yidL	yidL	yidL		1
ECK120021028	yidP	yidP	yidP		1
ECK120009110	yidQ	yidQ	yidQ	yidQp	1
ECK120021029	yidR	yidR	yidR	yidRp2	1
ECK120021031	yidX	yidX	yidX		1
ECK120027699	yidZ	yidZ	yidZ		1
ECK120021034	yifE	yifE	yifE		1
ECK120027716	yifK	yifK	yifK		1
ECK120021035	yigE	yigE	yigE		1
ECK120027721	yigI	yigI	yigI	yigIp	1
ECK120027726	yigM	yigM	yigM	yigMp3	1
ECK120021036	yihA	yihA	yihA	yihAp9	1
ECK120027732	yihD	yihD	yihD	yihDp	1
ECK120010884	yihG	yihG	yihG	yihGp	1
ECK120027735	yihI	yihI	yihI	yihIp	1
ECK120027738	yihN	yihN	yihN	yihNp5	1
ECK120027742	yihR	yihR	yihR		1
ECK120027756	yiiQ	yiiQ	yiiQ	yiiQp4	1
ECK120027757	yiiR	yiiR	yiiR		1
ECK120027762	yiiX	yiiX	yiiX		1
ECK120027763	yijE	yijE	yijE	yijEp5	1
ECK120027764	yijF	yijF	yijF	yijFp5	1
ECK120027767	yijO	yijO	yijO	yijOp5	1
ECK120027768	yijP	yijP	yijP	yijPp9	1
ECK120009066	yjaB	yjaB	yjaB	yjaBp	1
ECK120027777	yjaG	yjaG	yjaG	yjaGp4	1
ECK120030223	yjaH	yjaH	yjaH	yjaHp1	1
ECK120009585	yjaZ	yjaZ	yjaZ	yjaZp	1
ECK120027780	yjbB	yjbB	yjbB	yjbBp	1
ECK120027787	yjbI	yjbI	yjbI		1
ECK120027789	yjbJ	yjbJ	yjbJ		1
ECK120021038	yjcB	yjcB	yjcB	yjcBp	1
ECK120021039	yjcC	yjcC	yjcC	yjcCp	1
ECK120027797	yjcF	yjcF	yjcF	yjcFp6	1
ECK120027801	yjcS	yjcS	yjcS	yjcSp	1
ECK120027808	yjdF	yjdF	yjdF		1
ECK120027804	yjdM	yjdM	yjdM	yjdMp5	1
ECK120027803	yjdN	yjdN	yjdN		1
ECK120027802	yjdP	yjdP	yjdP		1
ECK120027818	yjeA	yjeA	yjeA	yjeAp	1
ECK120021040	yjeH	yjeH	yjeH		1
ECK120027813	yjeI	yjeI	yjeI	yjeIp	1
ECK120027815	yjeK	yjeK	yjeK	yjeKp3	1
ECK120027819	yjeM	yjeM	yjeM		1
ECK120027824	yjeT	yjeT	yjeT		1
ECK120049207	yjeV	yjeV	yjeV	yjeVp	1
ECK120027827	yjfN	yjfN	yjfN		1
ECK120021043	yjfY	yjfY	yjfY	yjfYp2	1
ECK120027841	yjgH	yjgH	yjgH		1
ECK120027845	yjgL	yjgL	yjgL	yjgLp2	1
ECK120021048	yjgM	yjgM	yjgM	yjgMp10	1
ECK120027848	yjgR	yjgR	yjgR	yjgRp3	1
ECK120027851	yjgW	yjgW	yjgW		1
ECK120027852	yjgX_3	yjgX_3	yjgX_3		1
ECK120021050	yjgZ	yjgZ	yjgZ	yjgZp1	1
ECK120021051	yjhD	yjhD	yjhD		1
ECK120027855	yjhE	yjhE	yjhE		1
ECK120027862	yjhF	yjhF	yjhF		1
ECK120027865	yjhP	yjhP	yjhP		1
ECK120021052	yjhR	yjhR	yjhR		1
ECK120021053	yjiC	yjiC	yjiC		1
ECK120027871	yjiJ	yjiJ	yjiJ	yjiJp4	1
ECK120021055	yjiR	yjiR	yjiR		1
ECK120027877	yjiT	yjiT	yjiT	yjiTp	1
ECK120027878	yjiV	yjiV	yjiV		1
ECK120027880	yjiY	yjiY	yjiY	yjiYp3	1
ECK120027892	yjjI	yjjI	yjjI		1
ECK120021056	yjjK	yjjK	yjjK	yjjKp11	1
ECK120027882	yjjM	yjjM	yjjM	yjjMp4	1
ECK120021057	yjjN	yjjN	yjjN		1
ECK120027884	yjjP	yjjP	yjjP	yjjPp	1
ECK120027891	yjjW	yjjW	yjjW		1
ECK120026502	yjjY	yjjY	yjjY	yjjYp6	1
ECK120021059	yjjZ	yjjZ	yjjZ	yjjZp	1
ECK120026578	ykfC	ykfC	ykfC		1
ECK120026598	ykgA	ykgA	ykgA		1
ECK120026602	ykgH	ykgH	ykgH		1
ECK120021060	ykgL	ykgL	ykgL	ykgLp1	1
ECK125095421	ykgR	ykgR	ykgR	ykgRp	1
ECK120026629	ykiA	ykiA	ykiA		1
ECK120026622	ykiB	ykiB	ykiB		1
ECK120026651	ylaB	ylaB	ylaB		1
ECK120026652	ylaC	ylaC	ylaC	ylaCp	1
ECK120026671	ylbG	ylbG	ylbG		1
ECK120026772	yliI	yliI	yliI		1
ECK120030152	ymbA	ymbA	ymbA		1
ECK120027915	ymdF	ymdF	ymdF		1
ECK120021064	ymfI	ymfI	ymfI	ymfIp1	1
ECK120026911	ymjA	ymjA	ymjA	ymjAp5	1
ECK120026941	ynaE	ynaE	ynaE		1
ECK120021065	ynaI	ynaI	ynaI	ynaIp	1
ECK120026923	ynaJ	ynaJ	ynaJ		1
ECK120021066	yncD	yncD	yncD	yncDp11	1
ECK120021067	yncE	yncE	yncE	yncEp	1
ECK120026973	yncG	yncG	yncG	yncGp	1
ECK120026974	yncH	yncH	yncH		1
ECK120026976	yncI	yncI	yncI		1
ECK120027912	yncJ	yncJ	yncJ		1
ECK120029312	yncK_1	yncK_1	yncK_1		1
ECK120029313	yncK_2	yncK_2	yncK_2		1
ECK120027911	yncL	yncL	yncL	yncLp4	1
ECK120026977	yncM	yncM	yncM		1
ECK120027000	yneF	yneF	yneF	yneFp7	1
ECK120026993	yneL	yneL	yneL		1
ECK120027005	yneM	yneM	yneM	yneMp	1
ECK120021068	ynfC	ynfC	ynfC	ynfCp9	1
ECK120027033	ynfD	ynfD	ynfD	ynfDp6	1
ECK120027036	ynfL	ynfL	ynfL	ynfLp6	1
ECK120029316	ynfP	ynfP	ynfP		1
ECK120021069	yniB	yniB	yniB	yniBp	1
ECK120027079	yniC	yniC	yniC	yniCp	1
ECK120027076	yniD	yniD	yniD	yniDp6	1
ECK120027085	ynjE	ynjE	ynjE	ynjEp	1
ECK120027109	yoaA	yoaA	yoaA		1
ECK120027113	yoaD	yoaD	yoaD		1
ECK120021072	yoaE	yoaE	yoaE	yoaEp	1
ECK120021073	yoaF	yoaF	yoaF	yoaFp10	1
ECK120021074	yoaH	yoaH	yoaH	yoaHp1	1
ECK120021075	yoaI	yoaI	yoaI		1
ECK120027114	yobD	yobD	yobD		1
ECK120021076	yobH	yobH	yobH	yobHp4	1
ECK120021077	yodD	yodD	yodD		1
ECK120015946	yoeA	yoeA	yoeA		1
ECK120027171	yoeE	yoeE	yoeE		1
ECK120027174	yoeF	yoeF	yoeF		1
ECK120021078	yohD	yohD	yohD	yohDp2	1
ECK120027221	yohF	yohF	yohF		1
ECK120027223	yohH	yohH	yohH		1
ECK120027218	yohO	yohO	yohO	yohOp6	1
ECK120027249	yojI	yojI	yojI	yojIp	1
ECK120021079	ypdI	ypdI	ypdI	ypdIp1	1
ECK120027295	ypdJ	ypdJ	ypdJ		1
ECK120027305	ypeC	ypeC	ypeC		1
ECK120027330	ypfH	ypfH	ypfH		1
ECK120027347	yphA	yphA	yphA		1
ECK120027350	yphG	yphG	yphG		1
ECK120021080	yphH	yphH	yphH		1
ECK120027384	ypjA	ypjA	ypjA	ypjAp8	1
ECK120027386	ypjB	ypjB	ypjB		1
ECK120027387	ypjC	ypjC	ypjC		1
ECK120027393	yqaE	yqaE	yqaE	yqaEp	1
ECK120027461	yqeA	yqeA	yqeA		1
ECK120027462	yqeB	yqeB	yqeB		1
ECK120027473	yqfB	yqfB	yqfB		1
ECK120027479	yqfE	yqfE	yqfE		1
ECK120021082	yqgC	yqgC	yqgC		1
ECK120021083	yqgD	yqgD	yqgD		1
ECK120021085	yqhC	yqhC	yqhC	yqhCp1	1
ECK120027507	yqhG	yqhG	yqhG		1
ECK120027508	yqhH	yqhH	yqhH	yqhHp4	1
ECK120027522	yqiC	yqiC	yqiC	yqiCp1	1
ECK120027545	yqjG	yqjG	yqjG	yqjGp2	1
ECK120021086	yqjI	yqjI	yqjI	yqjIp	1
ECK120030168	yraN	yraN	yraN		1
ECK120015336	yrbL	yrbL	yrbL	yrbLp	1
ECK120021088	yrdA	yrdA	yrdA	yrdAp	1
ECK120027627	yrhC	yrhC	yrhC		1
ECK120027662	ysaA	ysaA	ysaA		1
ECK120027658	ysaB	ysaB	ysaB	ysaBp1	1
ECK120021089	ysgA	ysgA	ysgA	ysgAp	1
ECK120021090	ytfA	ytfA	ytfA		1
ECK120021091	ytfB	ytfB	ytfB	ytfBp	1
ECK120016777	ytfE	ytfE	ytfE	ytfEp	1
ECK120027833	ytfG	ytfG	ytfG		1
ECK120009119	ytfJ	ytfJ	ytfJ	ytfJp	1
ECK120015507	ytfK	ytfK	ytfK	ytfKp	1
ECK120027835	ytfL	ytfL	ytfL	ytfLp3	1
ECK120027889	ytjA	ytjA	ytjA		1
ECK120021093	ytjC	ytjC	ytjC		1
ECK120027717	yzcX	yzcX	yzcX		1
ECK120009185	yzfA	yzfA	yzfA	yzfAp2	1
ECK120027611	yzgL	yzgL	yzgL		1
ECK120027476	zapA	zapA	zapA	zapAp3	1
ECK120021037	zapB	zapB	zapB	zapBp1	1
ECK120015950	zinT	zinT	zinT	zinTp	1
ECK120027310	zipA	zipA	zipA	zipAp9	1
ECK120009039	zntA	zntA	zntA	zntAp	1
ECK120009040	znuA	znuA	znuA	znuAp	1
ECK120009821	zraP	zraP	zraP	zraPp	1
ECK120021094	zupT	zupT	zupT	zupTp	1
ECK120009400	zwf	zwf	zwf	zwfp	1
ECK120009828	acnB	acnB	acnB	acnBp	2
ECK125095460	acrD	acrD	acrD	acrDp2	2
ECK120009789	adhE	adhE	adhE	adhEp2	2
ECK120021169	alaE	alaE	alaE	alaEp1	2
ECK120029337	alr	alr	alr	alrp1	2
ECK125135966	amiC	amiC	amiC	amiCp7	2
ECK120034121	ampH	ampH	ampH	ampHp2	2
ECK120011076	ansB	ansB	ansB	ansBp1	2
ECK120015353	ansP	ansP	ansP	ansPp1	2
ECK120020533	appY	appY	appY	appYp	2
ECK120008920	aqpZ	aqpZ	aqpZ	aqpZp2	2
ECK120011090	argE	argE	argE	argEp2	2
ECK120009200	argR	argR	argR	argRp1	2
ECK120029298	aroH	aroH	aroH	aroHp2	2
ECK120009205	aroP	aroP	aroP	aroPp1	2
ECK120015350	aspS	aspS	aspS	aspSp	2
ECK120010950	bamD	bamD	bamD	bamDp	2
ECK125136180	bax	bax	bax	baxp7	2
ECK120009573	bolA	bolA	bolA	bolAp1	2
ECK120021030	cbrA	cbrA	cbrA	cbrAp6	2
ECK120030166	cdsA	cdsA	cdsA	cdsAp2	2
ECK120009780	cfa	cfa	cfa	cfap1	2
ECK120009207	cirA	cirA	cirA	cirAp1	2
ECK125135442	citT	citT	citT	citTp6	2
ECK120030183	clpS	clpS	clpS	clpSp6	2
ECK120021109	comR	comR	comR	comRp	2
ECK120021198	crcB	crcB	crcB	crcBp3	2
ECK120026573	crl	crl	crl	crlp1	2
ECK125135951	csiR	csiR	csiR	csiRp5	2
ECK120011080	cspA	cspA	cspA	cspAp1	2
ECK120026709	cspE	cspE	cspE	cspEp2	2
ECK120009635	cutC	cutC	cutC	cutCp	2
ECK120034151	cysK	cysK	cysK	cysKp2	2
ECK120026716	dacA	dacA	dacA	dacAp2	2
ECK120030636	dapB	dapB	dapB	dapBp2	2
ECK120021184	dcuD	dcuD	dcuD	dcuDp2	2
ECK120027788	dgkA	dgkA	dgkA	dgkAp	2
ECK120026538	dgt	dgt	dgt	dgtp1	2
ECK120021205	dld	dld	dld	dldp6	2
ECK125136263	dusA	dusA	dusA	dusAp9	2
ECK125135855	eco	eco	eco	ecop7	2
ECK120027261	elaA	elaA	elaA	elaAp3	2
ECK120009637	endA	endA	endA	endAp2	2
ECK120009113	entS	entS	entS	entSp2	2
ECK125095215	exuT	exuT	exuT	exutP1	2
ECK120049200	fadR	fadR	fadR	fadRp	2
ECK125109849	fhuF	fhuF	fhuF	fhuFp2	2
ECK125136250	fieF	fieF	fieF	fieFp4	2
ECK120011106	fkpA	fkpA	fkpA	fkpAp1	2
ECK120016218	fliE	fliE	fliE	fliEp	2
ECK120029335	fre	fre	fre	frep1	2
ECK120026545	frr	frr	frr	frrp3	2
ECK120016700	ftnB	ftnB	ftnB	ftnBp	2
ECK120027510	ftsP	ftsP	ftsP	ftsPp1	2
ECK120009178	gcd	gcd	gcd	gcdp2	2
ECK120009605	glgS	glgS	glgS	glgSp2	2
ECK120034149	glk	glk	glk	glkp1	2
ECK125095423	glmY	glmY	glmY	glmYp2	2
ECK120033556	glnS	glnS	glnS	glnSp2	2
ECK120009601	gltA	gltA	gltA	gltAp2	2
ECK120011118	glyU	glyU	glyU	glyUp	2
ECK120027636	gor	gor	gor		2
ECK125109872	gpmA	gpmA	gpmA	gpmAp2	2
ECK120026571	gpt	gpt	gpt		2
ECK120016560	greA	greA	greA	greAp2	2
ECK120027609	greB	greB	greB	greBp7	2
ECK120030780	hchA	hchA	hchA	hchAp2	2
ECK125136218	hdfR	hdfR	hdfR	hdfRp6	2
ECK125135461	hscC	hscC	hscC	hscCp7	2
ECK120009592	htgA	htgA	htgA	htgAp2	2
ECK125135985	hyuA	hyuA	hyuA	hyuAp6	2
ECK120021225	iap	iap	iap	iapp6	2
ECK120009610	icd	icd	icd	icdAp2	2
ECK120016554	infA	infA	infA	infAp1	2
ECK120021243	insA-7	insA-7	insA-7	insAp13	2
ECK125136164	insH-11	insH-11	insH-11	insHp4	2
ECK125135803	insH-6	insH-6	insH-6	insHp4	2
ECK125135318	insL-1	insL-1	insL-1	insLp6	2
ECK120027289	intS	intS	intS	intSp	2
ECK120021054	iraD	iraD	iraD	iraDp2	2
ECK120026861	iraM	iraM	iraM	iraMp	2
ECK120026626	iraP	iraP	iraP	iraPp1	2
ECK120034118	ispU	ispU	ispU	ispUp2	2
ECK120021254	ivy	ivy	ivy	ivyp4	2
ECK120021261	ligB	ligB	ligB	ligBp1	2
ECK120016564	lpp	lpp	lpp	lppp2	2
ECK125134702	luxS	luxS	luxS	luxSp1	2
ECK120011125	lysC	lysC	lysC	lysCp1	2
ECK120009411	lysU	lysU	lysU	lysUp1	2
ECK125135676	maeA	maeA	maeA	maeAp4	2
ECK120016693	malQ	malPQ	malQ	malQp	2
ECK120035090	mdfA	mdfA	mdfA	cmrp2	2
ECK120049212	mdh	mdh	mdh	mdhp2	2
ECK120021239	mdtK	mdtK	mdtK	mdtKp9	2
ECK120009065	metA	metA	metA	metAp2	2
ECK125140833	metH	metH	metH	metHp2	2
ECK120015515	metR	metR	metR	metRp2	2
ECK120010905	mfd	mfd	mfd	mfdp1	2
ECK125135349	mltD	mltD	mltD	mltDp4	2
ECK120009193	mpl	mpl	mpl	mplp2	2
ECK125135832	mrp	mrp	mrp	mrpp7	2
ECK125135744	msrB	msrB	msrB	msrBp6	2
ECK120029971	mtr	mtr	mtr	mtrp1	2
ECK125135968	mutH	mutH	mutH	mutHp7	2
ECK120027574	nanR	nanR	nanR	nanRp9	2
ECK120015958	narK	narK	narK	narKp2	2
ECK120010910	narU	narU	narU	narUp1	2
ECK120027074	nlpC	nlpC	nlpC	nlpCp3	2
ECK120029470	norR	norR	norR	norRp	2
ECK120034934	ompX	ompX	ompX	ompXp1	2
ECK120009575	osmB	osmB	osmB	osmBp1	2
ECK120011099	osmC	osmC	osmC	osmCp1	2
ECK125135896	oxc	oxc	oxc	oxcp11	2
ECK120027219	pbpG	pbpG	pbpG	pbpGp5	2
ECK125109839	pfkA	pfkA	pfkA	pfkAp1	2
ECK120015357	pfkB	pfkB	pfkB	pfkBp2	2
ECK120009832	phoH	phoH	phoH	phoHp1	2
ECK125135583	pinE	pinE	pinE	pinEp3	2
ECK125135011	plsB	plsB	plsB	plsBp2	2
ECK125135868	pmrD	pmrD	pmrD	pmrDp4	2
ECK120011116	ppiD	ppiD	ppiD	ppiDp2	2
ECK125135670	pptA	pptA	pptA	pptAp7	2
ECK125136330	prfC	prfC	prfC	prfCp4	2
ECK120009007	proP	proP	proP	proPp2	2
ECK120027357	pssA	pssA	pssA	pssAp4	2
ECK120008923	ptsG	ptsG	ptsG	ptsGp1	2
ECK120020440	purT	purT	purT	purTp3	2
ECK120027134	pykA	pykA	pykA	pykAp1	2
ECK120026930	racC	racC	racC	racCp4	2
ECK120026566	rayT	rayT	rayT	rayTp1	2
ECK120009516	rcsC	rcsC	rcsC	rcsCp4	2
ECK125136227	recQ	recQ	recQ	recQp2	2
ECK125135695	rem	rem	rem	remp2	2
ECK120020445	rfaH	rfaH	rfaH	rfaHp4	2
ECK120011127	ribA	ribA	ribA	ribAp1	2
ECK125135485	rlmF	rlmF	rlmF	rlmFp7	2
ECK120020451	rluF	rluF	rluF	rluFp1	2
ECK125135516	rmf	rmf	rmf	rmfp5	2
ECK120009796	rnb	rnb	rnb	rnbp2	2
ECK125135441	rnk	rnk	rnk	rnkp7	2
ECK125135921	rodZ	rodZ	rodZ	rodZp2	2
ECK120015340	rpsT	rpsT	rpsT	rpsTp2	2
ECK120021047	rraB	rraB	rraB	rraBp2	2
ECK120011163	rsd	rsd	rsd	rsdp2	2
ECK125136329	rsmC	rsmC	rsmC	rsmCp3	2
ECK120021087	rsmI	rsmI	rsmI	rsmIp6	2
ECK120027244	rsuA	rsuA	rsuA	rsuAp2	2
ECK120033594	rutR	rutR	rutR	rutRp2	2
ECK125135721	rydB	rydB	rydB	rydBp2	2
ECK120027177	sbmC	sbmC	sbmC	sbmCp1	2
ECK120008971	serA	serA	serA	serAp2	2
ECK120027909	setB	setB	setB	setBp2	2
ECK125135428	sfmA	sfmA	sfmA	sfmAp6	2
ECK125136077	sfsB	sfsB	sfsB	sfsBp3	2
ECK120015488	slyB	slyB	slyB	slyBp2	2
ECK125135885	smrB	smrB	smrB	smrBp6	2
ECK120009190	sohB	sohB	sohB	sohBp1	2
ECK120027844	tabA	tabA	tabA	tabAp4	2
ECK120020472	tdk	tdk	tdk	tdkp1	2
ECK125136100	tldD	tldD	tldD	tldDp7	2
ECK120015502	tpiA	tpiA	tpiA	tpiAp1	2
ECK120011085	trxA	trxA	trxA	trxAp2	2
ECK120010887	tsr	tsr	tsr	tsrp	2
ECK120009634	tsx	tsx	tsx	tsxp2	2
ECK120027736	typA	typA	typA	typAp1	2
ECK120009281	tyrP	tyrP	tyrP	tyrPp1	2
ECK120027730	ubiD	ubiD	ubiD	ubiDp8	2
ECK120034152	ucpA	ucpA	ucpA	ucpAp2	2
ECK120009182	uvrD	uvrD	uvrD	uvrDp2	2
ECK120009560	uxaB	uxaB	uxaB	uxaBp2	2
ECK120027682	xanP	xanP	xanP	xanPp4	2
ECK120009824	xapR	xapR	xapR	xapRp2	2
ECK120027786	xylE	xylE	xylE	xylEp1	2
ECK125135315	yaaA	yaaA	yaaA	yaaAp5	2
ECK120020483	yacH	yacH	yacH	yacHp3	2
ECK125135329	yadE	yadE	yadE	yadEp4	2
ECK120030641	yahA	yahA	yahA	yahAp2	2
ECK125135386	yahM	yahM	yahM	yahMp5	2
ECK120020492	yahN	yahN	yahN	yahNp5	2
ECK125135396	yaiY	yaiY	yaiY	yaiYp6	2
ECK120020498	yaiZ	yaiZ	yaiZ	yaiZp	2
ECK125135401	yajD	yajD	yajD	yajDp6	2
ECK125135418	ybaQ	ybaQ	ybaQ	ybaQp3	2
ECK120030125	ybbB	ybbB	ybbB	selUp4	2
ECK120016408	ybbN	ybbN	ybbN	ybbNp1	2
ECK120026690	ybcW	ybcW	ybcW	ybcWp4	2
ECK120020502	ybdH	ybdH	ybdH	ybdHp6	2
ECK120026733	ybfA	ybfA	ybfA	ybfAp7	2
ECK125135480	ybhA	ybhA	ybhA	ybhAp10	2
ECK125135483	ybhB	ybhB	ybhB	ybhBp4	2
ECK125135481	ybhD	ybhD	ybhD	ybhDp5	2
ECK120026750	ybhH	ybhH	ybhH	ybhHp7	2
ECK120026763	ybiO	ybiO	ybiO	ybiOp2	2
ECK120026782	ybjE	ybjE	ybjE	ybjEp3	2
ECK125135493	ybjL	ybjL	ybjL	ybjLp12	2
ECK125135494	ybjM	ybjM	ybjM	ybjMp8	2
ECK120026787	ycaD	ycaD	ycaD	ycaDp1	2
ECK120026807	yccT	yccT	yccT	yccTp	2
ECK120030175	yceH	yceH	yceH	yceHp2	2
ECK125135567	ycfD	ycfD	ycfD	ycfDp5	2
ECK125135561	ycfT	ycfT	ycfT	ycfTp11	2
ECK125135596	ycgV	ycgV	ycgV	ycgVp10	2
ECK120026862	ycgX	ycgX	ycgX	ycgXp4	2
ECK120026882	ycgY	ycgY	ycgY	ycgYp1	2
ECK120026909	ycjD	ycjD	ycjD	ycjDp4	2
ECK125135648	ydbJ	ydbJ	ydbJ	ydbJp1	2
ECK120021123	ydbK	ydbK	ydbK	ydbKp	2
ECK120026956	ydcA	ydcA	ydcA	ydcAp6	2
ECK120026954	ydcF	ydcF	ydcF	ydcFp3	2
ECK120021124	ydcI	ydcI	ydcI	ydcIp	2
ECK125135657	ydcJ	ydcJ	ydcJ	ydcJp11	2
ECK120026968	ydcW	ydcW	ydcW	prrp3	2
ECK125135687	ydeE	ydeE	ydeE	ydeEp4	2
ECK120026990	ydeN	ydeN	ydeN	ydeNp3	2
ECK120027013	ydfK	ydfK	ydfK	ydfKp	2
ECK120027038	ydgD	ydgD	ydgD	ydgDp4	2
ECK125135711	ydhF	ydhF	ydhF	ydhFp3	2
ECK120027061	ydhZ	ydhZ	ydhZ	ydhZp5	2
ECK125135724	ydiM	ydiM	ydiM	ydiMp5	2
ECK125135742	ydjE	ydjE	ydjE	ydjEp6	2
ECK125135743	ydjF	ydjF	ydjF	ydjFp7	2
ECK125135745	yeaI	yeaI	yeaI	yeaIp6	2
ECK120021137	yeaM	yeaM	yeaM	yeaMp1	2
ECK120027099	yeaN	yeaN	yeaN	yeaNp4	2
ECK125135748	yeaO	yeaO	yeaO	yeaOp4	2
ECK125135750	yeaQ	yeaQ	yeaQ	yeaQp3	2
ECK120015362	yebB	yebB	yebB	yebBp1	2
ECK120021139	yebQ	yebQ	yebQ	yebQp4	2
ECK120027124	yebW	yebW	yebW	yebWp3	2
ECK125135786	yecH	yecH	yecH	yecHp5	2
ECK120030127	yecM	yecM	yecM	yecMp2	2
ECK120027154	yedI	yedI	yedI	yedIp2	2
ECK125135799	yeeN	yeeN	yeeN	yeeNp7	2
ECK120027182	yeeZ	yeeZ	yeeZ	yeeZp5	2
ECK120021149	yegJ	yegJ	yegJ	yegJp7	2
ECK120027201	yegX	yegX	yegX	yegXp1	2
ECK120030133	yeiL	yeiL	yeiL		2
ECK125135849	yeiQ	yeiQ	yeiQ	yeiQp6	2
ECK120027243	yejG	yejG	yejG	yejGp5	2
ECK125135865	yfaZ	yfaZ	yfaZ	yfaZp5	2
ECK120021155	yfbK	yfbK	yfbK	yfbKp3	2
ECK120021156	yfbN	yfbN	yfbN	yfbNp1	2
ECK125135880	yfcI	yfcI	yfcI	yfcIp8	2
ECK120021158	yfdY	yfdY	yfdY	yfdYp5	2
ECK125135899	yfeA	yfeA	yfeA	yfeAp6	2
ECK120021159	yfeH	yfeH	yfeH	yfeHp3	2
ECK125135927	yfhR	yfhR	yfhR	yfhRp4	2
ECK125135945	yfjH	yfjH	yfjH	yfjHp3	2
ECK120021170	ygbI	ygbI	ygbI	ygbIp5	2
ECK120016217	ygcG	ygcG	ygcG	ygcGp6	2
ECK120027416	ygcW	ygcW	ygcW	ygcWp11	2
ECK120021171	ygdI	ygdI	ygdI	ygdIp7	2
ECK120015512	yggE	yggE	yggE	yggEp2	2
ECK125136029	ygiD	ygiD	ygiD	ygiDp3	2
ECK120027523	ygiL	ygiL	ygiL	ygiLp4	2
ECK125136020	ygiQ	ygiQ	ygiQ	ygiQp5	2
ECK120027514	ygiV	ygiV	ygiV	ygiVp2	2
ECK120020732	ygjD	ygjD	ygjD	gcpp2	2
ECK125136039	ygjH	ygjH	ygjH	ygjHp4	2
ECK120027531	ygjI	ygjI	ygjI	ygjIp1	2
ECK120027546	yhaH	yhaH	yhaH	yhaHp7	2
ECK120021005	yhaJ	yhaJ	yhaJ	yhaJp4	2
ECK120027570	yhcC	yhcC	yhcC	yhcCp6	2
ECK125136090	yhcM	yhcM	yhcM	yhcMp4	2
ECK125136091	yhcN	yhcN	yhcN	yhcNp6	2
ECK125136092	yhcO	yhcO	yhcO	yhcOp3	2
ECK125136102	yhdH	yhdH	yhdH	yhdHp6	2
ECK120021013	yhhA	yhhA	yhhA	yhhAp4	2
ECK120021014	yhhK	yhhK	yhhK	yhhKp1	2
ECK125136150	yhhM	yhhM	yhhM	yhhMp4	2
ECK120027620	yhhN	yhhN	yhhN	yhhNp4	2
ECK120027614	yhhX	yhhX	yhhX	yhhXp4	2
ECK120027645	yhjE	yhjE	yhjE	yhjEp8	2
ECK120027653	yhjX	yhjX	yhjX	yhjXp5	2
ECK120027656	yiaD	yiaD	yiaD	yiaDp3	2
ECK120021024	yibT	yibT	yibT	yibTp5	2
ECK125136210	yieH	yieH	yieH	yieHp6	2
ECK120027746	yiiE	yiiE	yiiE	yiiEp5	2
ECK120027747	yiiF	yiiF	yiiF	yiiFp7	2
ECK125136246	yiiG	yiiG	yiiG	yiiGp8	2
ECK120027752	yiiM	yiiM	yiiM	yiiMp4	2
ECK125136257	yjaA	yjaA	yjaA	yjaAp4	2
ECK125136267	yjcE	yjcE	yjcE	yjcEp8	2
ECK120027814	yjeJ	yjeJ	yjeJ	yjeJp6	2
ECK125136284	yjfP	yjfP	yjfP	yjfPp5	2
ECK120021044	yjfZ	yjfZ	yjfZ	yjfZp7	2
ECK125136318	yjiS	yjiS	yjiS	yjiSp4	2
ECK120027893	yjjJ	yjjJ	yjjJ	yjjJp2	2
ECK120021058	yjjX	yjjX	yjjX	yjjXp5	2
ECK125136334	yjtD	yjtD	yjtD	yjtDp8	2
ECK120026600	ykgD	ykgD	ykgD	ykgDp2	2
ECK120026592	ykgJ	ykgJ	ykgJ	ykgJp2	2
ECK120026881	ymgE	ymgE	ymgE	ymgEp6	2
ECK120026999	yneE	yneE	yneE	yneEp5	2
ECK120027003	yneJ	yneJ	yneJ	yneJp5	2
ECK120027004	yneK	yneK	yneK	yneKp5	2
ECK120027018	ynfN	ynfN	ynfN	ynfNp5	2
ECK125135719	ynhG	ynhG	ynhG	ynhGp7	2
ECK125135739	ynjF	ynjF	ynjF	ynjFp6	2
ECK125109025	ynjH	ynjH	ynjH	ynjHp2	2
ECK120027110	yoaB	yoaB	yoaB	yoaBp2	2
ECK125135791	yodC	yodC	yodC	yodCp7	2
ECK125135837	yohC	yohC	yohC	yohCp4	2
ECK120027326	ypfG	ypfG	ypfG	ypfGp3	2
ECK120027907	ypfM	ypfM	ypfM	ypfMp	2
ECK125135944	ypjD	ypjD	ypjD	ypjDp5	2
ECK120027463	yqeC	yqeC	yqeC	yqeCp5	2
ECK125135974	yqeH	yqeH	yqeH	yqeHp5	2
ECK125135991	yqfA	yqfA	yqfA	yqfAp10	2
ECK125136002	yqgA	yqgA	yqgA	yqgAp4	2
ECK125135993	yqgB	yqgB	yqgB	yqgBp4	2
ECK125136019	yqhA	yqhA	yqhA	yqhAp8	2
ECK120009118	yraP	yraP	yraP	yraPp	2
ECK120027555	yraQ	yraQ	yraQ	yraQp3	2
ECK120027618	yrhB	yrhB	yrhB	yrhBp7	2
ECK120027832	ytfF	ytfF	ytfF	ytfFp5	2
ECK120021092	ytfH	ytfH	ytfH	ytfHp5	2
ECK120026802	zapC	zapC	zapC	ycbWp4	2
ECK120026746	zitB	zitB	zitB	zitBp1	2
ECK125136262	zur	zur	zur	zurp7	2
ECK120034134	acnA	acnA	acnA	acnAp3	3
ECK120021188	ade	ade	ade	adep	3
ECK120021189	ais	ais	ais	aisp4	3
ECK125136045	alx	alx	alx	alxp4	3
ECK125135404	ampG	ampG	ampG	ampGp5	3
ECK125136259	arpA	arpA	arpA	arpAp9	3
ECK125135559	bhsA	bhsA	bhsA	bhsAp8	3
ECK120016404	bssS	bssS	bssS	bssSp2	3
ECK120009631	clpA	clpA	clpA	clpAp3	3
ECK120030677	crp	crp	crp	crpp2	3
ECK125135693	cspF	cspF	cspF	cspFp7	3
ECK120009171	cstA	cstA	cstA	cstAp2	3
ECK120030679	cyaA	cyaA	cyaA	cyaAp2	3
ECK125135654	cybB	cybB	cybB	cybBp7	3
ECK120026558	dnaQ	dnaQ	dnaQ		3
ECK125135469	dtpD	dtpD	dtpD	dtpDp8	3
ECK125135513	elfA	elfA	elfA	elfAp7	3
ECK120026649	ffs	ffs	ffs	ffsp5	3
ECK120009595	fimB	fimB	fimB	fimBp1	3
ECK120008982	flu	flu	flu	flup	3
ECK120033267	ftsK	ftsK	ftsK	ftsKp2	3
ECK125136268	gltP	gltP	gltP	gltPp6	3
ECK120009137	gltX	gltX	gltX	gltXp1	3
ECK120009419	gntT	gntT	gntT	gntTp1	3
ECK125135547	grxB	grxB	grxB	grxBp2	3
ECK125135928	hcaT	hcaT	hcaT	hcaTp6	3
ECK125109028	hemL	hemL	hemL	hemLp2	3
ECK125135766	holE	holE	holE	holEp6	3
ECK125095426	htpG	htpG	htpG	htpGp3	3
ECK125136192	htrL	htrL	htrL	yibBp8	3
ECK120026723	insH-3	insH-3	insH-3	insHp3	3
ECK125135808	insH-7	insH-7	insH-7	insHp5	3
ECK125135957	ispF	ispDF	ispF	ispFp3	3
ECK125135756	kdgR	kdgR	kdgR	kdgRp8	3
ECK120027359	kgtP	kgtP	kgtP	kgtPp6	3
ECK120027708	kup	kup	kup	kupp1	3
ECK120021262	lit	lit	lit	litp1	3
ECK120027516	mdaB	mdaB	mdaB	mdaBp1	3
ECK125135658	mdoD	mdoD	mdoD	opgDp7	3
ECK120008983	metJ	metJ	metJ	metJp1	3
ECK125135834	mlrA	mlrA	mlrA	mlrAp9	3
ECK125135856	mqo	mqo	mqo	mqop5	3
ECK120021235	mrr	mrr	mrr		3
ECK120009658	ompC	ompC	ompC	ompCp2	3
ECK125135645	ompN	ompN	ompN	ompNp4	3
ECK120049209	pepA	pepA	pepA	pepAp3	3
ECK120026304	pepD	pepD	pepD	pepDp3	3
ECK125135725	ppsR	ppsR	ppsR	ppsRp6	3
ECK120010897	pspF	pspF	pspF	pspFp1	3
ECK120029309	purU	purU	purU	purUp3	3
ECK120026933	racR	racR	racR	racRp3	3
ECK125135852	rplY	rplY	rplY	rplYp5	3
ECK120020457	slyA	slyA	slyA	slyAp10	3
ECK125136115	slyD	slyD	slyD	slyDp7	3
ECK120009139	ssb	ssb	ssb	ssbp1	3
ECK120009580	stpA	stpA	stpA	stpAp2	3
ECK120034123	tig	tig	tig	tigp3	3
ECK120020582	torT	torT	torT	torTp1	3
ECK125135640	trkG	trkG	trkG	trkGp7	3
ECK120009618	uspA	uspA	uspA	uspAp3	3
ECK120009183	uvrB	uvrB	uvrB	uvrBp3	3
ECK125135316	yaaI	yaaI	yaaI	yaaIp3	3
ECK125135330	yadD	yadD	yadD	yadDp4	3
ECK125135337	yadN	yadN	yadN	yadNp8	3
ECK120026559	yafT	yafT	yafT	yafTp4	3
ECK125135399	yaiI	yaiI	yaiI	yaiIp7	3
ECK120020468	ybaP	ybaP	ybaP	ybaPp3	3
ECK125135431	ybcK	ybcK	ybcK	ybcKp7	3
ECK125135491	ybiU	ybiU	ybiU	ybiUp7	3
ECK125135505	ycaK	ycaK	ycaK	ycaKp4	3
ECK125135520	yccX	yccX	yccX	yccXp5	3
ECK120026876	ycgN	ycgN	ycgN	ycgNp1	3
ECK125135668	ydcX	ydcX	ydcX	ydcXp9	3
ECK120027007	ydeI	ydeI	ydeI	ydeIp1	3
ECK125135712	ydhC	ydhC	ydhC	ydhCp5	3
ECK125135715	ydhS	ydhS	ydhS	ydhSp5	3
ECK120021135	ydiY	ydiY	ydiY	ydiYp6	3
ECK125135770	yebA	yebA	yebA	yebAp6	3
ECK125135801	yeeO	yeeO	yeeO	yeeOp7	3
ECK120021148	yegI	yegI	yegI	yegIp7	3
ECK120027207	yehE	yehE	yehE	yehEp1	3
ECK125135843	yeiE	yeiE	yeiE	yeiEp6	3
ECK120027908	yeiW	yeiW	yeiW	yeiWp	3
ECK125135877	yfbO	yfbO	yfbO	yfbOp6	3
ECK120034157	yfgM	yfgM	yfgM	yfgMp3	3
ECK125135939	yfiL	yfiL	yfiL	yfiLp10	3
ECK125135981	ygeI	ygeI	ygeI	ygeIp7	3
ECK120027457	ygeW	ygeW	ygeW	ygeWp1	3
ECK125135999	yggM	yggM	yggM	yggMp4	3
ECK120010946	yggN	yggN	yggN	yggNp2	3
ECK125136007	yghJ	yghJ	yghJ	yghJp7	3
ECK125136025	ygiW	ygiW	ygiW	ygiWp6	3
ECK125136132	yhgE	yhgE	yhgE	yhgEp9	3
ECK125136179	yiaB	yiaB	yiaB	yiaBp6	3
ECK125136185	yiaU	yiaU	yiaU	yiaUp11	3
ECK120027664	yiaY	yiaY	yiaY	yiaYp4	3
ECK125136219	yifB	yifB	yifB	yifBp8	3
ECK120027733	yihF	yihF	yihF	yihFp1	3
ECK125136239	yihQ	yihQ	yihQ	yihQp6	3
ECK120021049	yjgN	yjgN	yjgN	yjgNp3	3
ECK125136309	yjhU	yjhU	yjhU	yjhUp8	3
ECK125136315	yjiK	yjiK	yjiK	yjiKp9	3
ECK125135379	ykgC	ykgC	ykgC	ykgCp8	3
ECK120026827	ymdA	ymdA	ymdA	ymdAp5	3
ECK125135579	ymfK	ymfK	ymfK	cohEp10	3
ECK125135697	ynfA	ynfA	ynfA	ynfAp5	3
ECK120027037	ynfM	ynfM	ynfM	ynfMp	3
ECK120027078	yniA	yniA	yniA	yniAp1	3
ECK125135740	ynjI	ynjI	ynjI	ynjIp4	3
ECK125135753	yoaC	yoaC	yoaC	yoaCp7	3
ECK120027441	yqeF	yqeF	yqeF	yqeFp1	3
ECK125135973	yqeG	yqeG	yqeG	yqeGp8	3
ECK125135979	yqeK	yqeK	yqeK	yqeKp11	3
ECK125136048	yqjF	yqjF	yqjF	yqjFp4	3
ECK125136037	yqjH	yqjH	yqjH	yqjHp4	3
ECK125136070	yraR	yraR	yraR	yraRp1	3
ECK125136078	yrbA	yrbA	yrbA	yrbAp4	3
ECK125135651	azoR	azoR	azoR	azoRp8	4
ECK125136175	bisC	bisC	bisC	bisCp7	4
ECK125135805	cld	cld	cld	cldp7	4
ECK125135707	cnu	cnu	cnu	cnup9	4
ECK125136153	dcrB	dcrB	dcrB	dcrBp6	4
ECK125135343	dxr	dxr	dxr	dxrp3	4
ECK125135413	fsr	fsr	fsr	fsrp6	4
ECK120009775	hupB	hupB	hupB	hupBp2	4
ECK125135988	idi	idi	idi	idip5	4
ECK125135584	mcrA	mcrA	mcrA	mcrAp8	4
ECK125135628	mppA	mppA	mppA	mppAp5	4
ECK125136124	nudE	nudE	nudE	nudEp6	4
ECK120009648	ppiA	ppiA	ppiA	ppiAp4	4
ECK125109846	pykF	pykF	pykF	pykFp3	4
ECK120029516	rne	rne	rne	rnep2	4
ECK120027685	setC	setC	setC	setCp10	4
ECK120008973	treR	treR	treR	treRp2	4
ECK120026588	yagN	yagN	yagN	yagNp3	4
ECK125135391	yaiS	yaiS	yaiS	yaiSp12	4
ECK125135411	ybaN	ybaN	ybaN	ybaNp8	4
ECK120026697	ybdJ	ybdJ	ybdJ	ybdJp2	4
ECK125135444	ybeF	ybeF	ybeF	ybeFp5	4
ECK120026792	ycaL	ycaL	ycaL	ycaLp1	4
ECK125135502	ycaM	ycaM	ycaM	ycaMp3	4
ECK120021108	yceF	yceF	yceF	yceFp6	4
ECK125135734	ydjO	ydjO	ydjO	ydjOp10	4
ECK125135763	yebV	yebV	yebV	yebVp6	4
ECK125135824	yegS	yegS	yegS	yegSp6	4
ECK120021153	yfaL	yfaL	yfaL	yfaLp1	4
ECK125135887	yfcV	yfcV	yfcV	yfcVp8	4
ECK125135889	yfdF	yfdF	yfdF	yfdFp7	4
ECK125135916	yfgG	yfgG	yfgG	yfgGp5	4
ECK120027374	yfjI	yfjI	yfjI	yfjIp3	4
ECK125135996	yggI	yggI	yggI	yggIp6	4
ECK120027498	yghQ	yghQ	yghQ	yghQp1	4
ECK120027537	ygjQ	ygjQ	ygjQ	ygjQp3	4
ECK125136050	yhaI	yhaI	yhaI	yhaIp10	4
ECK125136119	yhfL	yhfL	yhfL	yhfLp8	4
ECK120021017	yhiM	yhiM	yhiM	yhiMp	4
ECK125136181	yiaT	yiaT	yiaT	yiaTp4	4
ECK125136206	yicO	yicO	yicO	yicOp11	4
ECK125136264	yjcD	yjcD	yjcD	yjcDp5	4
ECK125136271	yjcO	yjcO	yjcO	yjcOp4	4
ECK125136277	yjdL	yjdL	yjdL	yjdLp2	4
ECK125136291	yjgA	yjgA	yjgA	yjgAp8	4
ECK125136300	yjgB	yjgB	yjgB	yjgBp10	4
ECK120027881	yjjL	yjjL	yjjL	yjjLp5	4
ECK120026854	ymfJ	ymfJ	ymfJ	ymfJp6	4
ECK120026869	ymgF	ymgF	ymgF	ymgFp1	4
ECK125135797	yodB	yodB	yodB	yodBp15	4
ECK120027606	yrfF	yrfF	yrfF	yrfFp6	4
ECK125136290	ytfI	ytfI	ytfI	ytfIp11	4
ECK125136099	aaeR	aaeR	aaeR	aaeRp10	5
ECK125138146	csrA	csrA	csrA	csrAp2	5
ECK125135369	matA	matA	matA	matAp5	5
ECK120009710	putP	putP	putP	putPp1	5
ECK125136226	rarD	rarD	rarD	rarDp5	5
ECK125136060	tdcR	tdcR	tdcR	tdcRp8	5
ECK120011103	topA	topA	topA	topAp3	5
ECK125135475	ybgS	ybgS	ybgS	ybgSp2	5
ECK120021117	yciN	yciN	yciN	yciNp5	5
ECK125135664	ydcL	ydcL	ydcL	ydcLp7	5
ECK120027264	yfbL	yfbL	yfbL	yfbLp3	5
ECK125136167	yhjR	yhjR	yhjR	yhjRp10	5
ECK120021210	envR	envR	envR	envRp9	6
ECK125135621	pgpB	pgpB	pgpB	pgpBp9	6
ECK120027625	rhsB	rhsB	rhsB	rhsBp3	6
ECK120009277	rpoH	rpoH	rpoH	rpoHp4	6
ECK125135789	sdiA	sdiA	sdiA	sdiAp8	6
ECK125135783	uspC	uspC	uspC	uspCp8	6
ECK125135453	ybeQ	ybeQ	ybeQ	ybeQp5	6
ECK120009741	arcA	arcA	arcA	arcAp1	7
ECK125135526	cspH	cspH	cspH	cspHp12	7
ECK125136013	yghT	yghT	yghT	yghTp5	7
ECK125136066	yraH	yraH	yraH	yraHp10	8

## Sheet: Distancia_Genes
Distance between the pairs of genes in the operons
Data source Regulon DB v9.0
Description of columns:
1.- Number of genes in the operon
2.-ID gene 1 designed by RegulonDB v9.0
3.- Gene 1name
4.- Gene 2 name
5.- Operon name
6.- The columns 6 and 7 contain the gene 1 coordinates (start and end)
8.- Coordinate gene 2 left(start)
9.-Transcription direction (strand)
10.- Distance between adyacent pairs of genes (end of gene 1 and start gen2)
#Genes_Operon	ID gen 1	Gen 1	Gen 2	Operon name	Left gene 1	Right gene 2	Left gene 2	Strand	Dist_gene1_ gene 2
3	ECK120023918	insCD-2	insD-2	insCD-2C-2D-2	1465945	1467218	1465945	reverse	-1274
3	ECK120023919	insCD-3	insD-3	insCD-3C-3D-3	2066976	2068249	2066976	reverse	-1274
6	ECK120023920	insCD-4	insD-4	insCD-4C-4D-4-ygeONM	2994394	2995667	2994394	reverse	-1274
3	ECK120023908	insEF-2	insF-2	insEF-2E-2F-2	390963	392134	390963	reverse	-1172
3	ECK120023910	insEF-4	insF-4	insEF-4E-4F-4	1093498	1094669	1093498	reverse	-1172
3	ECK120023917	insCD-1	insC-1	insC-1CD-1D-1	380530	381803	380898	forward	-906
6	ECK120023921	insCD-5	insC-5	insC-5CD-5D-5-yqiGHI	3184164	3185437	3184532	forward	-906
3	ECK120023922	insCD-6	insC-6	insC-6CD-6D-6	4496250	4497523	4496618	forward	-906
4	ECK120023906	insEF-1	insE-1	eaeH-insE-1EF-1F-1	314506	315677	314811	forward	-867
3	ECK120023909	insEF-3	insE-3	insE-3EF-3F-3	566056	567227	566361	forward	-867
3	ECK120023907	insEF-5	insE-5	insE-5EF-5F-5	2168251	2169422	2168556	forward	-867
3	ECK120023911	insAB-1	insB-1	insAB-1A-1B-1	19811	20508	19811	reverse	-698
5	ECK120023913	insAB-2	insB-2	insAB-2A-2B-2-afuBC	278402	279099	278402	reverse	-698
3	ECK120023914	insAB-3	insB-3	insAB-3A-3B-3	289873	290570	289873	reverse	-698
3	ECK120023915	insAB-5	insB-5	insAB-5A-5B-5	1976542	1977239	1976542	reverse	-698
3	ECK120023912	insAB-4	insA-4	insA-4AB-4B-4	1049056	1049753	1049250	forward	-504
5	ECK120023916	insAB-6	insA-6	yhhZ-yrhA-insA-6AB-6B-6	3581506	3582203	3581700	forward	-504
3	ECK120002826	insC-1	insD-1	insC-1CD-1D-1	380530	380940	380530	forward	-411
6	ECK120004139	insC-5	insD-5	insC-5CD-5D-5-yqiGHI	3184164	3184574	3184164	forward	-411
3	ECK120004389	insC-6	insD-6	insC-6CD-6D-6	4496250	4496660	4496250	forward	-411
4	ECK120002788	insE-1	insF-1	eaeH-insE-1EF-1F-1	314506	314814	314506	forward	-309
3	ECK120002904	insE-3	insF-3	insE-3EF-3F-3	566056	566364	566056	forward	-309
3	ECK120003709	insE-5	insF-5	insE-5EF-5F-5	2168251	2168559	2168251	forward	-309
3	ECK120016282	insA-4	insB-4	insA-4AB-4B-4	1049056	1049331	1049056	forward	-276
5	ECK120004301	insA-6	insB-6	yhhZ-yrhA-insA-6AB-6B-6	3581506	3581781	3581506	forward	-276
2	ECK120000366	mokC	hokC	mokC-hokC	16751	16960	16751	reverse	-210
3	ECK120002667	sgrS	sgrT	sgrST-setA	77367	77593	77388	forward	-206
2	ECK120002592	rybA	mntS	rybA-mntS	851948	852287	852092	reverse	-196
15	ECK120004320	phnE_2	phnE_1	phnCDE_1E_2FGHIJKLMNOP	4320466	4320834	4320684	reverse	-151
5	ECK120001277	ydfE	insD	dicB-ydfDE-insD-intQ	1648102	1649022	1648905	forward	-118
3	ECK120002705	insB-1	insA-1	insAB-1A-1B-1	19811	20314	20233	reverse	-82
5	ECK120002758	insB-2	insA-2	insAB-2A-2B-2-afuBC	278402	278905	278824	reverse	-82
3	ECK120002765	insB-3	insA-3	insAB-3A-3B-3	289873	290376	290295	reverse	-82
3	ECK120003616	insB-5	insA-5	insAB-5A-5B-5	1976542	1977045	1976964	reverse	-82
3	ECK120016925	yjhW	yjhV	insO-2-yjhWV	4507574	4507816	4507743	forward	-74
6	ECK120003732	yfaS_1	yfaT	yfaATS_1S_2QP	2328321	2332424	2332358	reverse	-67
2	ECK120003943	ypjM_2	ypjM_1	ypjM_1M_2	2770858	2771058	2770998	reverse	-61
6	ECK120004041	ygeN	ygeO	insCD-4C-4D-4-ygeONM	2993770	2994042	2993984	reverse	-59
2	ECK120004392	yjgX_2	yjgX_1	yjgX_1X_2	4498066	4498512	4498455	reverse	-58
2	ECK120000122	btuB	murI	btuB-murI	4161662	4163506	4163451	forward	-56
3	ECK120003410	ydfN	nohA	nohA-ydfN-tfaQ	1632909	1633871	1633822	reverse	-50
2	ECK120001559	ychG_2	ychG_1	ychG_1G_2	1293649	1294239	1294191	reverse	-49
2	ECK120004309	yifO	yifN	yifNO	3958035	3958310	3958265	reverse	-46
2	ECK120004400	insI-3	insM	insMI-3	4505489	4506640	4506597	reverse	-44
3	ECK120002750	insN-1	insI-1	insN-1I-1O-1	269466	269870	269827	forward	-44
3	ECK120003317	insD-2	insC-2	insCD-2C-2D-2	1465945	1466850	1466808	reverse	-43
3	ECK120003662	insD-3	insC-3	insCD-3C-3D-3	2066976	2067881	2067839	reverse	-43
6	ECK120004043	insD-4	insC-4	insCD-4C-4D-4-ygeONM	2994394	2995299	2995257	reverse	-43
2	ECK120004440	yjjQ	bglJ	yjjQ-bglJ	4601500	4602225	4602183	forward	-43
2	ECK120002644	sroD	fadD	fadD-sroD	1886041	1886126	1886085	reverse	-42
2	ECK120002673	yajL	panE	panE-yajL	442275	442865	442828	reverse	-38
2	ECK120001838	pflD	pflC	pflDC	4142018	4144315	4144281	forward	-35
2	ECK120002952	dpiB	dpiA	dpiBA	651458	653116	653085	forward	-32
4	ECK120002780	ecpE	ecpD	ecpBCDE	303719	304429	304398	reverse	-32
3	ECK120001380	holD	rimI	holD-rimI-yjjG	4605826	4606239	4606208	forward	-32
2	ECK120003593	yebS	yebT	yebST	1914282	1915565	1915534	forward	-32
2	ECK120002739	ykfJ	prfH	ykfJ-prfH	253467	253733	253702	forward	-32
11	ECK120004212	lptC	lptA	yrbG-kdsDC-lptCAB-rpoN-hpf-ptsN-rapZ-npr	3340858	3341433	3341402	forward	-32
9	ECK120001694	yjeF	tsaE	yjeF-tsaE-amiB-mutL-miaA-hfq-hflXKC	4392089	4393636	4393608	forward	-29
4	ECK120003969	nrdI	nrdE	nrdHIEF	2798987	2799397	2799370	forward	-28
6	ECK120002946	citG	citX	citCDEFXG	645854	646732	646707	reverse	-26
5	ECK120003425	insD	intQ	dicB-ydfDE-insD-intQ	1648905	1649561	1649536	forward	-26
6	ECK120003864	eutQ	eutP	eutSPQTDM	2572324	2573025	2573000	reverse	-26
2	ECK120001689	otsA	otsB	otsBA	1978212	1979636	1979611	reverse	-26
6	ECK120003496	sufD	sufC	sufABCDSE	1758544	1759815	1759790	reverse	-26
12	ECK120003687	wcaD	wcaC	wcaCDEF-gmd-fcl-gmm-wcaI-cpsBG-wcaJ-wzxC	2127685	2128902	2128877	reverse	-26
5	ECK120001525	thiP	tbpA	sgrR-sroA-tbpA-thiPQ	72911	74521	74497	reverse	-25
2	ECK120003286	ynaA	lomR_1	ynaA-lomR_1	1424478	1425506	1425482	forward	-25
6	ECK120002846	thiL	pgpA	nrdR-ribDE-nusB-thiL-pgpA	434858	435835	435813	forward	-23
4	ECK120002156	xylG	xylH	xylFGHR	3730224	3731765	3731743	forward	-23
5	ECK120001885	alsC	alsA	rpiR-alsBACE	4306512	4307492	4307471	reverse	-22
2	ECK120001057	vsr	dcm	dcm-vsr	2028472	2028942	2028923	reverse	-20
6	ECK120003161	lpoB	thiK	hinT-ycfL-lpoB-thiK-nagZ-ycfP	1161861	1162502	1162483	forward	-20
4	ECK120002879	ylbH	ybbD	rhsD-ybbC-ylbH-ybbD	527173	527883	527864	forward	-20
2	ECK120004071	cptA	sdhE	sdhE-cptA	3038438	3038845	3038826	reverse	-20
3	ECK120001909	wbbJ	wbbI	wbbIJK	2102518	2103108	2103089	reverse	-20
3	ECK120002238	intE	xisE	ymfH-xisE-intE	1198902	1200029	1200010	reverse	-20
2	ECK120003283	ynaK	ydaY	ynaK-ydaY	1423401	1423664	1423645	forward	-20
4	ECK120002138	bcsC	bcsZ	bcsABZC	3683723	3687196	3687178	reverse	-19
9	ECK120000437	hisA	hisF	hisLGDCBHAFI	2093149	2093886	2093868	forward	-19
2	ECK120001760	mobB	mobA	mobAB	4038929	4039456	4039438	reverse	-19
2	ECK120003314	paaX	paaY	paaXY	1461563	1462513	1462495	forward	-19
5	ECK120002438	dgoA	dgoK	dgoRKADT	3871018	3871635	3871619	reverse	-17
3	ECK120003424	ydfX	dicC	dicC-ydfXW	1645370	1645660	1645644	reverse	-17
12	ECK120004247	gspC	gspD	gspCDEFGHIJKLMO	3453600	3454415	3454399	forward	-17
4	ECK120004280	hofO	hofN	hofMNOP	3519031	3519471	3519455	reverse	-17
2	ECK120000008	rhsE	ydcD	rhsE-ydcD	1525914	1527962	1527946	forward	-17
5	ECK120001524	thiQ	thiP	sgrR-sroA-tbpA-thiPQ	72229	72927	72911	reverse	-17
6	ECK120002671	thiS	thiF	thiCEFSGH	4190660	4190860	4190844	reverse	-17
4	ECK120001146	ygiA	ygiB	tolC-ygiABC	3177618	3177878	3177862	forward	-17
4	ECK120002395	ybjC	nfsA	ybjC-nfsA-rimK-ybjN	890136	890423	890407	forward	-17
6	ECK120004140	insD-5	yqiG	insC-5CD-5D-5-yqiGHI	3184532	3185437	3185422	forward	-16
6	ECK120004042	ygeO	insCD-4	insCD-4C-4D-4-ygeONM	2993984	2994409	2994394	reverse	-16
5	ECK120001137	ppdC	ygdB	ppdAB-ygdB-ppdC-recC	2960463	2960786	2960771	reverse	-16
3	ECK120001910	wbbK	wbbJ	wbbIJK	2101415	2102533	2102518	reverse	-16
4	ECK120000117	bioF	bioC	bioBFCD	809604	810758	810745	forward	-14
7	ECK120003991	casE	casD	casABCDE12	2877810	2878409	2878396	reverse	-14
2	ECK120002874	fetA	fetB	fetAB	515143	515820	515807	forward	-14
2	ECK120003446	mdtI	mdtJ	mdtJI	1670844	1671173	1671160	reverse	-14
2	ECK120002755	mmuP	mmuM	mmuPM	274549	275952	275939	forward	-14
16	ECK120000335	ftsI	murE	mraZ-rsmH-ftsLI-murEF-mraY-murD-ftsW-murGC-ddlB-ftsQAZ-lpxC	91413	93179	93166	forward	-14
15	ECK120001974	napH	napG	napFDAGHBC-ccmABCDEFGH	2296737	2297600	2297587	reverse	-14
2	ECK120001679	nfrA	nfrB	nfrBA	587205	590177	590164	reverse	-14
15	ECK120000716	phnO	phnN	phnCDE_1E_2FGHIJKLMNOP	4313127	4313561	4313548	reverse	-14
5	ECK120002674	sapC	sapB	sapABCDF	1351652	1352542	1352529	reverse	-14
11	ECK120003244	ycjO	ycjP	ycjMNOPQRSTUV-ymjB	1371246	1372127	1372114	forward	-14
2	ECK120003842	yfeZ	ypeA	ypeA-yfeZ	2549299	2549748	2549735	reverse	-14
4	ECK120002314	ytfT	yjfF	ytfQRT-yjfF	4450597	4451619	4451606	forward	-14
2	ECK120003124	efeU_1	efeU_2	efeU_1U_2	1080579	1080689	1080677	forward	-13
3	ECK120003103	etp	gfcE	gfcE-etp-etk	1043453	1043899	1043887	reverse	-13
2	ECK120001950	psuG	psuK	psuKG	2255451	2256389	2256377	reverse	-13
6	ECK120002383	agaC	agaD	agaS-kbaY-agaBCDI	3282707	3283510	3283500	forward	-11
2	ECK120001298	codB	codA	codBA	354146	355405	355395	forward	-11
2	ECK120002926	cusS	cusR	cusRS	592551	593993	593983	reverse	-11
5	ECK120000175	cyoC	cyoB	cyoABCDE	447270	447884	447874	reverse	-11
5	ECK120000178	cysA	cysW	cysPUWAM	2537739	2538836	2538826	reverse	-11
4	ECK120002781	ecpD	ecpC	ecpBCDE	304398	306041	306031	reverse	-11
4	ECK120003857	eutG	eutJ	eutNEJG	2566346	2567533	2567523	reverse	-11
2	ECK120000212	dedD	folC	folC-dedD	2429044	2429706	2429696	reverse	-11
4	ECK120001793	frvX	frvB	frvABXR	4087878	4088948	4088938	reverse	-11
3	ECK120000384	glpA	glpB	glpABC	2350669	2352297	2352287	forward	-11
4	ECK120004279	hofP	hofO	hofMNOP	3518637	3519041	3519031	reverse	-11
8	ECK120001734	hybB	hybA	hybOABCDEFG	3141008	3142186	3142176	reverse	-11
12	ECK120003875	hyfF	hyfG	hyfABCDEFGHIJR-focB	2604939	2606519	2606509	forward	-11
15	ECK120002044	napD	napF	napFDAGHBC-ccmABCDEFGH	2300772	2301035	2301025	reverse	-11
11	ECK120003310	paaH	paaI	paaABCDEFGHIJK	1457078	1458505	1458495	forward	-11
5	ECK120001450	yceG	tmk	pabC-yceG-tmk-holB-ycfH	1153335	1154357	1154347	forward	-11
3	ECK120001732	hofC	hofB	ppdD-hofBC	114522	115724	115714	reverse	-11
2	ECK120003925	ratB	ratA	ratAB	2752030	2752320	2752310	reverse	-11
2	ECK120000337	rsmD	yhhL	rsmD-yhhL	3602416	3603012	3603002	forward	-11
2	ECK120002877	ybbO	tesA	tesA-ybbO	517564	518373	518363	reverse	-11
4	ECK120002803	yahE	yahF	yahDEFG	335149	336012	336002	forward	-11
5	ECK120002981	ybgK	ybgL	ybgIJKL-nei	743466	744398	744388	forward	-11
5	ECK120003342	ydcU	ydcV	ydcSTUV-patD	1511855	1512796	1512786	forward	-11
3	ECK120003923	yfiR	dgcN	yfiR-dgcN-yfiB	2739897	2740415	2740405	forward	-11
2	ECK120003972	ygaZ	ygaH	ygaZH	2807639	2808376	2808366	forward	-11
3	ECK120004239	yhdT	panF	yhdT-panF-prmA	3405397	3405639	3405629	forward	-11
3	ECK120000301	fic	yhfG	yhfG-fic-pabA	3488883	3489485	3489475	reverse	-11
3	ECK120001638	yidG	yidH	yidHGF	3853631	3853993	3853983	reverse	-11
2	ECK120003112	ymcE	gnsA	ymcE-gnsA	1051070	1051300	1051290	forward	-11
4	ECK120004166	yqjE	yqjK	yqjCDEK	3247705	3248109	3248099	forward	-11
6	ECK120003082	elfC	elfG	elfDCG-ycbUVF	998439	1001039	1001030	forward	-10
6	ECK120000477	hypB	hypC	hypABCDE-fhlA	2849023	2849895	2849886	forward	-10
5	ECK120001139	ppdB	ppdA	ppdAB-ygdB-ppdC-recC	2961175	2961738	2961729	reverse	-10
3	ECK120003805	yfdR	yfdS	yfdRST	2473006	2473542	2473533	forward	-10
3	ECK120003997	ygcN	ygcO	ygcNOP	2890679	2891950	2891941	forward	-10
10	ECK120003191	ymfP	ymfQ	ymfTLMNROPQ-ycfK-ymfS	1205483	1206145	1206136	forward	-10
2	ECK120002304	lplT	aas	aas-lplT	2970691	2971884	2971877	reverse	-8
7	ECK120001019	trpS	gph	aroKB-damX-dam-rpe-gph-trpS	3510656	3511660	3511653	reverse	-8
7	ECK120001802	gph	rpe	aroKB-damX-dam-rpe-gph-trpS	3511653	3512411	3512404	reverse	-8
5	ECK120003528	astE	astB	astCADBE	1823979	1824947	1824940	reverse	-8
4	ECK120000115	bioC	bioD	bioBFCD	810745	811500	811493	forward	-8
7	ECK120003994	casB	casA	casABCDE12	2880177	2880659	2880652	reverse	-8
6	ECK120003366	ddpF	ddpD	ddpXABCDF	1555136	1556062	1556055	reverse	-8
6	ECK120003085	ycbV	ycbF	elfDCG-ycbUVF	1002662	1003177	1003170	forward	-8
3	ECK120001206	fdnH	fdnI	fdnGHI	1548485	1549369	1549362	forward	-8
3	ECK120000352	fur	uof	fldA-uof-fur	709423	709869	709862	reverse	-8
3	ECK120002690	flhA	flhB	flhBAE	1960996	1963074	1963067	reverse	-8
6	ECK120001318	fliF	fliG	fliFGHIJK	2011253	2012911	2012904	forward	-8
6	ECK120001598	fliG	fliH	fliFGHIJK	2012904	2013899	2013892	forward	-8
2	ECK120001506	glmM	folP	folP-glmM	3320755	3322092	3322085	reverse	-8
4	ECK120000325	frdB	frdA	frdABCD	4377806	4378540	4378533	reverse	-8
3	ECK120000339	ftsX	ftsE	ftsYEX	3599051	3600109	3600102	reverse	-8
12	ECK120004253	gspI	gspJ	gspCDEFGHIJKLMO	3459996	3460373	3460366	forward	-8
12	ECK120004254	gspJ	gspK	gspCDEFGHIJKLMO	3460366	3460953	3460946	forward	-8
8	ECK120001738	hybF	hybE	hybOABCDEFG	3137999	3138340	3138333	reverse	-8
8	ECK120001737	hybE	hybD	hybOABCDEFG	3138333	3138821	3138814	reverse	-8
9	ECK120003979	hycI	hycH	hycABCDEFGHI	2840595	2841065	2841058	reverse	-8
12	ECK120003878	hyfI	hyfJ	hyfABCDEFGHIJR-focB	2608728	2609486	2609479	forward	-8
2	ECK120001520	kefF	kefC	kefFC	47246	47776	47769	forward	-8
3	ECK120003169	lolC	lolD	lolCDE	1174650	1175849	1175842	forward	-8
2	ECK120002859	mdlA	mdlB	mdlAB	468095	469867	469860	forward	-8
3	ECK120001676	metI	metN	metNIQ	220968	221621	221614	reverse	-8
5	ECK120001609	moaC	moaD	moaABCDE	817793	818278	818271	forward	-8
16	ECK120000612	murC	ddlB	mraZ-rsmH-ftsLI-murEF-mraY-murD-ftsW-murGC-ddlB-ftsQAZ-lpxC	100765	102240	102233	forward	-8
3	ECK120002209	btuF	mtn	mtn-btuF-yadS	177662	178462	178455	reverse	-8
2	ECK120000636	narL	narX	narXL	1274402	1275052	1275045	reverse	-8
7	ECK120001875	nrfE	nrfF	nrfABCDEFG	4289535	4291193	4291186	forward	-8
2	ECK120001815	opgG	opgH	opgGH	1108558	1110093	1110086	forward	-8
4	ECK120001929	yehX	yehY	osmF-yehYXW	2214503	2215429	2215422	reverse	-8
4	ECK120003127	pgaC	pgaB	pgaABCD	1085744	1087069	1087062	reverse	-8
15	ECK120000711	phnJ	phnI	phnCDE_1E_2FGHIJKLMNOP	4316784	4317629	4317622	reverse	-8
3	ECK120000762	proV	proW	proVWX	2802837	2804039	2804032	forward	-8
3	ECK120000815	recB	ptrA	ptrA-recBD	2950483	2954025	2954018	reverse	-8
6	ECK120001830	ydaC	ralR	recET-ralR-ydaCQ-intR	1411555	1411764	1411757	reverse	-8
6	ECK120001828	recT	recE	recET-ralR-ydaCQ-intR	1412008	1412817	1412810	reverse	-8
2	ECK120003933	rnlA	rnlB	rnlAB	2763940	2765013	2765006	forward	-8
4	ECK120001408	scpA	argK	scpA-argK-scpBC	3058872	3061016	3061009	forward	-8
7	ECK120000963	srlR	gutQ	srlAEBD-gutM-srlR-gutQ	2827069	2827842	2827835	forward	-8
5	ECK120003078	ssuA	ssuE	ssuEADCB	995208	996167	996160	reverse	-8
6	ECK120001537	thiF	thiE	thiCEFSGH	4190844	4191599	4191592	reverse	-8
10	ECK120001311	waaP	waaG	waaQGPSBOJYZU	3803176	3803973	3803966	reverse	-8
2	ECK120002717	rof	yaeP	yaeP-rof	213678	213932	213925	reverse	-8
5	ECK120002912	ninE	ybcO	ybcN-ninE-ybcO-rusA-ylcG	572144	572314	572307	forward	-8
5	ECK120003010	ybhS	ybhF	ybiH-ybhGFSR	825342	826475	826468	reverse	-8
5	ECK120003011	ybhF	ybhG	ybiH-ybhGFSR	826468	828204	828197	reverse	-8
8	ECK120003461	rsxB	rsxC	ydgK-rsxABCDGE-nth	1704372	1704950	1704943	forward	-8
4	ECK120001920	yehM	yehP	yehLMPQ	2203717	2205996	2205989	forward	-8
5	ECK120004091	rdgB	yggW	yggSTU-rdgB-yggW	3094703	3095296	3095289	forward	-8
9	ECK120002166	sgbH	sgbU	yiaKLMNO-lyxK-sgbHUE	3746600	3747262	3747255	forward	-8
9	ECK120001254	mutL	miaA	yjeF-tsaE-amiB-mutL-miaA-hfq-hflXKC	4395435	4397282	4397275	forward	-8
3	ECK120002796	ykgF	ykgG	ykgEFG	321562	322989	322982	forward	-8
2	ECK120004030	yqeI	yqeJ	yqeIJ	2986524	2987333	2987326	forward	-8
2	ECK120000209	deaD	yrbN	yrbN-deaD	3303993	3305882	3305875	reverse	-8
2	ECK120001225	chpS	chpB	chpSB	4446470	4446721	4446715	forward	-7
4	ECK120001641	galM	galK	galETKM	787020	788060	788054	reverse	-7
9	ECK120000441	hisF	hisI	hisLGDCBHAFI	2093868	2094644	2094638	forward	-7
7	ECK120003389	lsrA	lsrC	lsrACDBFG-tam	1599514	1601049	1601043	forward	-7
16	ECK120000615	murF	mraY	mraZ-rsmH-ftsLI-murEF-mraY-murD-ftsW-murGC-ddlB-ftsQAZ-lpxC	94650	96008	96002	forward	-7
2	ECK120003723	preT	preA	preTA	2232055	2233293	2233287	forward	-7
2	ECK120001669	viaA	ravA	ravA-viaA	3926175	3927626	3927620	reverse	-7
8	ECK120000922	sdhC	sdhD	sdhCDAB-sucABCD	754400	754789	754783	forward	-7
2	ECK120000682	pcm	umpG	umpG-pcm	2866915	2867541	2867535	reverse	-7
5	ECK120002980	ybgJ	ybgK	ybgIJKL-nei	742816	743472	743466	forward	-7
2	ECK120004200	yhbS	yhbT	yhbTS	3298277	3298780	3298774	reverse	-7
3	ECK120004263	yheT	yheU	yheSTU	3481224	3482246	3482240	forward	-7
9	ECK120002167	sgbU	sgbE	yiaKLMNO-lyxK-sgbHUE	3747255	3748115	3748109	forward	-7
4	ECK120001781	yihX	yihY	yihXY-dtd-yiiD	4073576	4074175	4074169	forward	-7
5	ECK120002643	sroC	gltI	gltI-sroC-gltJKL	685904	686066	686062	reverse	-5
2	ECK120003930	abpB	abpA	abpAB	2759373	2761562	2761559	reverse	-4
3	ECK120001870	actP	yjcH	acs-yjcH-actP	4281276	4282925	4282922	reverse	-4
2	ECK120000037	ampD	ampE	ampDE	118733	119284	119281	forward	-4
5	ECK120000006	hisM	hisQ	argT-hisJQMP	2422539	2423255	2423252	reverse	-4
7	ECK120003744	arnA	arnD	arnBCADTEF	2366061	2368043	2368040	forward	-4
7	ECK120003746	arnT	arnE	arnBCADTEF	2368930	2370582	2370579	forward	-4
5	ECK120003529	astB	astD	astCADBE	1824940	1826283	1826280	reverse	-4
5	ECK120003530	astD	astA	astCADBE	1826280	1827758	1827755	reverse	-4
5	ECK120003531	astA	astC	astCADBE	1827755	1828789	1828786	reverse	-4
4	ECK120001613	atoA	atoE	atoDAEB	2322131	2322781	2322778	forward	-4
2	ECK120001610	atoS	atoC	atoSC	2318065	2319891	2319888	forward	-4
8	ECK120000539	lpxB	rnhB	bamA-skp-lpxD-fabZ-lpxAB-rnhB-dnaE	203348	204496	204493	forward	-4
3	ECK120002144	bcsE	bcsF	bcsEFG	3694481	3696052	3696049	forward	-4
3	ECK120002145	bcsF	bcsG	bcsEFG	3696049	3696240	3696237	forward	-4
4	ECK120000114	bioB	bioF	bioBFCD	808567	809607	809604	forward	-4
6	ECK120002949	citE	citD	citCDEFXG	648805	649713	649710	reverse	-4
6	ECK120001144	yggC	yggD	cmtBA-yggPFDC	3071998	3072711	3072708	reverse	-4
6	ECK120001221	yggF	yggP	cmtBA-yggPFDC	3073239	3074204	3074201	reverse	-4
3	ECK120002049	cobS	cobU	cobUST	2062503	2063246	2063243	reverse	-4
2	ECK120000159	cpxA	cpxR	cpxRA	4101625	4102998	4102995	reverse	-4
2	ECK120001190	crfC	yjcZ	crfC-yjcZ	4325158	4327386	4327383	forward	-4
2	ECK120004323	dcuR	dcuS	dcuSR	4347338	4348057	4348054	reverse	-4
3	ECK120002221	tcyN	tcyL	dcyD-tcyLN	1995086	1995838	1995835	reverse	-4
6	ECK120003367	ddpD	ddpC	ddpXABCDF	1556055	1557041	1557038	reverse	-4
6	ECK120003368	ddpC	ddpB	ddpXABCDF	1557038	1557934	1557931	reverse	-4
5	ECK120004465	dgoD	dgoA	dgoRKADT	3869873	3871021	3871018	reverse	-4
5	ECK120002439	dgoK	dgoR	dgoRKADT	3871619	3872497	3872494	reverse	-4
5	ECK120000221	dicB	ydfD	dicB-ydfDE-insD-intQ	1647633	1647821	1647818	forward	-4
5	ECK120002340	dppF	dppD	dppABCDF	3699887	3700891	3700888	reverse	-4
2	ECK120000246	ebgA	ebgC	ebgAC	3220655	3223747	3223744	forward	-4
2	ECK120004215	mtgA	elbB	elbB-mtgA	3347103	3347831	3347828	reverse	-4
3	ECK120002918	rrrD	rzpD	essD-rrrD-rzpD	576836	577333	577330	forward	-4
4	ECK120003415	ydfP	rrrQ	essQ-ydfR-rrrQ-ydfP	1637054	1637551	1637548	reverse	-4
4	ECK120003416	rrrQ	ydfR	essQ-ydfR-rrrQ-ydfP	1637548	1638081	1638078	reverse	-4
2	ECK120003855	eutA	eutH	eutHA	2563503	2564906	2564903	reverse	-4
6	ECK120003862	eutD	eutT	eutSPQTDM	2570511	2571527	2571524	reverse	-4
6	ECK120003863	eutT	eutQ	eutSPQTDM	2571524	2572327	2572324	reverse	-4
4	ECK120000278	fdhE	fdoI	fdoGHI-fdhE	4078322	4079251	4079248	reverse	-4
4	ECK120001787	fdoI	fdoH	fdoGHI-fdhE	4079248	4079883	4079880	reverse	-4
5	ECK120026445	ylbE_1	ylbE_2	fdrA-ylbE_1E_2F-ybcF	547581	547841	547838	forward	-4
5	ECK120002897	ylbF	ybcF	fdrA-ylbE_1E_2F-ybcF	548850	549665	549662	forward	-4
5	ECK120000283	fecD	fecC	fecABCDE	4509481	4510437	4510434	reverse	-4
5	ECK120000282	fecC	fecB	fecABCDE	4510434	4511432	4511429	reverse	-4
2	ECK120000286	fecR	fecI	fecIR	4514787	4515740	4515737	reverse	-4
3	ECK120000289	fepC	fepG	fepDGC	618607	619422	619419	reverse	-4
3	ECK120000292	fepG	fepD	fepDGC	619419	620411	620408	reverse	-4
4	ECK120016289	ybdZ	entF	fes-ybdZ-entF-fepE	613165	613383	613380	forward	-4
4	ECK120000299	fhuD	fhuB	fhuACDB	170575	171465	171462	forward	-4
4	ECK120001517	fixC	fixX	fixABCX	44180	45466	45463	forward	-4
6	ECK120002693	fliJ	fliK	fliFGHIJK	2015970	2016413	2016410	forward	-4
7	ECK120000317	fliM	fliN	fliLMNOPQR	2018111	2019115	2019112	forward	-4
5	ECK120004268	frlC	frlD	frlABCDR	3500362	3501192	3501189	forward	-4
2	ECK120002008	gapC_2	gapC_1	gapC_1C_2	1487737	1487988	1487985	reverse	-4
3	ECK120003106	gfcC	gfcB	gfcBCD	1047168	1047914	1047911	reverse	-4
5	ECK120000374	glgX	glgB	glgBXCAP	3567369	3569342	3569339	reverse	-4
3	ECK120000382	glnQ	glnP	glnHPQ	844964	845686	845683	reverse	-4
3	ECK120000385	glpB	glpC	glpABC	2352287	2353546	2353543	forward	-4
12	ECK120004249	gspE	gspF	gspCDEFGHIJKLMO	3456361	3457842	3457839	forward	-4
12	ECK120004252	gspH	gspI	gspCDEFGHIJKLMO	3459490	3459999	3459996	forward	-4
12	ECK120004256	gspL	gspM	gspCDEFGHIJKLMO	3461944	3463107	3463104	forward	-4
5	ECK120004468	hcaE	hcaF	hcaEFCBD	2667054	2668415	2668412	forward	-4
5	ECK120003904	hcaC	hcaB	hcaEFCBD	2668930	2669250	2669247	forward	-4
4	ECK120000423	hemD	hemC	hemCDXY	3987111	3987851	3987848	reverse	-4
2	ECK120004154	higA	higB	higBA	3231750	3232166	3232163	reverse	-4
9	ECK120000440	hisD	hisC	hisLGDCBHAFI	2089121	2090425	2090422	forward	-4
3	ECK120000453	hsdS	hsdM	hsdRMS	4578091	4579485	4579482	reverse	-4
6	ECK120000461	hyaA	hyaB	hyaABCDEF	1031362	1032480	1032477	forward	-4
6	ECK120000463	hyaC	hyaD	hyaABCDEF	1034289	1034996	1034993	forward	-4
6	ECK120000464	hyaD	hyaE	hyaABCDEF	1034993	1035580	1035577	forward	-4
6	ECK120000465	hyaE	hyaF	hyaABCDEF	1035577	1035975	1035972	forward	-4
8	ECK120001735	hybC	hybB	hybOABCDEFG	3139308	3141011	3141008	reverse	-4
9	ECK120000474	hycH	hycG	hycABCDEFGHI	2841058	2841468	2841465	reverse	-4
9	ECK120000469	hycC	hycB	hycABCDEFGHI	2845437	2847263	2847260	reverse	-4
12	ECK120003877	hyfH	hyfI	hyfABCDEFGHIJR-focB	2608186	2608731	2608728	forward	-4
8	ECK120000491	ilvG_2	ilvM	ilvLXG_1G_2MEDA	3949646	3950227	3950224	forward	-4
3	ECK120002836	insF-2	insE-2	insEF-2E-2F-2	390963	391829	391826	reverse	-4
3	ECK120003131	insF-4	insE-4	insEF-4E-4F-4	1093498	1094364	1094361	reverse	-4
3	ECK120004401	insO-2	yjhW	insO-2-yjhWV	4506981	4507577	4507574	forward	-4
2	ECK120000510	kdpE	kdpD	kdpDE	720279	720956	720953	reverse	-4
5	ECK120000530	livG	livM	livKHMGF	3591462	3592229	3592226	reverse	-4
5	ECK120000534	livM	livH	livKHMGF	3592226	3593503	3593500	reverse	-4
3	ECK120001888	lldR	lldD	lldPRD	3777077	3777853	3777850	forward	-4
6	ECK120000516	rsmA	pdxA	lptD-surA-pdxA-rsmA-apaGH	51609	52430	52427	reverse	-4
2	ECK120003061	macA	macB	macAB	918458	919573	919570	forward	-4
6	ECK120002037	mdtD	baeS	mdtABCD-baeSR	2159488	2160903	2160900	forward	-4
6	ECK120001565	baeS	baeR	mdtABCD-baeSR	2160900	2162303	2162300	forward	-4
3	ECK120001879	mdtP	mdtO	mdtNOP	4297587	4299053	4299050	reverse	-4
6	ECK120002291	menE	menC	menFDHBCE	2371670	2373025	2373022	reverse	-4
6	ECK120002292	menH	menD	menFDHBCE	2374856	2375614	2375611	reverse	-4
6	ECK120004472	mhpD	mhpF	mhpABCDFE	371339	372148	372145	forward	-4
6	ECK120004473	mhpF	mhpE	mhpABCDFE	372145	373095	373092	forward	-4
2	ECK120003347	ydcZ	mnaT	mnaT-ydcZ	1515906	1516355	1516352	reverse	-4
2	ECK120003020	mntR	ybiR	mntR-ybiR	852406	852873	852870	forward	-4
4	ECK120000595	motB	motA	motAB-cheAW	1973353	1974279	1974276	reverse	-4
16	ECK120001073	rsmH	ftsL	mraZ-rsmH-ftsLI-murEF-mraY-murD-ftsW-murGC-ddlB-ftsQAZ-lpxC	90094	91035	91032	forward	-4
16	ECK120000614	murE	murF	mraZ-rsmH-ftsLI-murEF-mraY-murD-ftsW-murGC-ddlB-ftsQAZ-lpxC	93166	94653	94650	forward	-4
16	ECK120000338	ftsW	murG	mraZ-rsmH-ftsLI-murEF-mraY-murD-ftsW-murGC-ddlB-ftsQAZ-lpxC	98403	99647	99644	forward	-4
16	ECK120000336	ftsQ	ftsA	mraZ-rsmH-ftsLI-murEF-mraY-murD-ftsW-murGC-ddlB-ftsQAZ-lpxC	103155	103985	103982	forward	-4
2	ECK120001185	murB	birA	murB-birA	4170080	4171108	4171105	forward	-4
5	ECK120004222	yhcH	nanK	nanATEK-yhcH	3367036	3367500	3367497	reverse	-4
5	ECK120004223	nanK	nanE	nanATEK-yhcH	3367497	3368372	3368369	reverse	-4
15	ECK120001965	ccmH	ccmG	napFDAGHBC-ccmABCDEFGH	2289380	2290432	2290429	reverse	-4
15	ECK120001966	ccmG	ccmF	napFDAGHBC-ccmABCDEFGH	2290429	2290986	2290983	reverse	-4
15	ECK120001967	ccmF	ccmE	napFDAGHBC-ccmABCDEFGH	2290983	2292926	2292923	reverse	-4
15	ECK120001968	ccmE	ccmD	napFDAGHBC-ccmABCDEFGH	2292923	2293402	2293399	reverse	-4
15	ECK120002065	ccmD	ccmC	napFDAGHBC-ccmABCDEFGH	2293399	2293608	2293605	reverse	-4
15	ECK120001970	ccmB	ccmA	napFDAGHBC-ccmABCDEFGH	2294384	2295046	2295043	reverse	-4
15	ECK120001973	napB	napH	napFDAGHBC-ccmABCDEFGH	2296291	2296740	2296737	reverse	-4
15	ECK120001976	napA	napD	napFDAGHBC-ccmABCDEFGH	2298289	2300775	2300772	reverse	-4
4	ECK120000631	narG	narH	narGHJI	1279087	1282830	1282827	forward	-4
4	ECK120000632	narH	narJ	narGHJI	1282827	1284365	1284362	forward	-4
4	ECK120000637	narV	narW	narZYWV	1533961	1534641	1534638	reverse	-4
4	ECK120000640	narY	narZ	narZYWV	1535333	1536877	1536874	reverse	-4
6	ECK120001982	nikB	nikC	nikABCDER	3613264	3614208	3614205	forward	-4
6	ECK120001984	nikD	nikE	nikABCDER	3615038	3615802	3615799	forward	-4
4	ECK120000646	nirB	nirD	nirBDC-cysG	3492033	3494576	3494573	forward	-4
2	ECK120003978	norV	norW	norVW	2830498	2831937	2831934	forward	-4
4	ECK120003968	nrdH	nrdI	nrdHIEF	2798745	2798990	2798987	forward	-4
7	ECK120001872	nrfB	nrfC	nrfABCDEFG	4287268	4287834	4287831	forward	-4
7	ECK120001873	nrfC	nrfD	nrfABCDEFG	4287831	4288502	4288499	forward	-4
7	ECK120001876	nrfF	nrfG	nrfABCDEFG	4291186	4291569	4291566	forward	-4
13	ECK120001997	nuoL	nuoK	nuoABCEFGHIJKLMN	2391227	2393068	2393065	reverse	-4
13	ECK120001996	nuoK	nuoJ	nuoABCEFGHIJKLMN	2393065	2393367	2393364	reverse	-4
13	ECK120001993	nuoH	nuoG	nuoABCEFGHIJKLMN	2394487	2395464	2395461	reverse	-4
13	ECK120001708	nuoF	nuoE	nuoABCEFGHIJKLMN	2398240	2399577	2399574	reverse	-4
2	ECK120000263	envZ	ompR	ompR-envZ	3532538	3533890	3533887	reverse	-4
5	ECK120000670	oppD	oppF	oppABCDF	1302778	1303791	1303788	forward	-4
11	ECK120003307	paaE	paaF	paaABCDEFGHIJK	1454454	1455524	1455521	forward	-4
5	ECK120002181	tmk	holB	pabC-yceG-tmk-holB-ycfH	1154347	1154988	1154985	forward	-4
4	ECK120002775	paoC	paoB	paoABCD	297960	300158	300155	reverse	-4
4	ECK120002776	paoB	paoA	paoABCD	300155	301111	301108	reverse	-4
2	ECK120001342	folK	pcnB	pcnB-folK	157253	157732	157729	reverse	-4
15	ECK120000714	phnM	phnL	phnCDE_1E_2FGHIJKLMNOP	4314105	4315241	4315238	reverse	-4
15	ECK120000712	phnK	phnJ	phnCDE_1E_2FGHIJKLMNOP	4316029	4316787	4316784	reverse	-4
15	ECK120000709	phnH	phnG	phnCDE_1E_2FGHIJKLMNOP	4318686	4319270	4319267	reverse	-4
4	ECK120000743	potD	potC	potABCD	1181006	1182052	1182049	reverse	-4
4	ECK120000742	potC	potB	potABCD	1182049	1182843	1182840	reverse	-4
4	ECK120001579	potH	potI	potFGHI	895357	896310	896307	forward	-4
5	ECK120001138	ygdB	ppdB	ppdAB-ygdB-ppdC-recC	2960771	2961178	2961175	reverse	-4
2	ECK120000787	purK	purE	purEK	550750	551817	551814	reverse	-4
2	ECK120002872	ybbJ	qmcA	qmcA-ybbJ	513625	514083	514080	reverse	-4
2	ECK120004133	qseB	qseC	qseBC	3167850	3168509	3168506	forward	-4
2	ECK120001459	trmO	rcsF	rcsF-trmO	218887	219594	219591	reverse	-4
5	ECK120001905	rfbX	rfbC	rfbBDACX	2106361	2107608	2107605	reverse	-4
12	ECK120001414	wecB	wecC	rfe-wzzE-wecBC-rffGHCA-wzxE-rffT-wzyE-rffM	3968156	3969286	3969283	forward	-4
12	ECK120001442	wzxE	rffT	rfe-wzzE-wecBC-rffGHCA-wzxE-rffT-wzyE-rffM	3974301	3975551	3975548	forward	-4
12	ECK120004311	rffT	wzyE	rfe-wzzE-wecBC-rffGHCA-wzxE-rffT-wzyE-rffM	3975548	3976627	3976624	forward	-4
3	ECK120001798	rhaA	rhaB	rhaBAD	4092746	4094005	4094002	reverse	-4
2	ECK120002002	yfiH	rluD	rluD-yfiH	2732325	2733056	2733053	reverse	-4
5	ECK120000264	era	rnc	rnc-era-recO-pdxJ-acpS	2700503	2701408	2701405	reverse	-4
4	ECK120003917	rseC	rseB	rpoE-rseABC	2705344	2705823	2705820	reverse	-4
11	ECK120000874	rplW	rplD	rpsJ-rplCDWB-rpsS-rplV-rpsC-rplP-rpmC-rpsQ	3449404	3449706	3449703	reverse	-4
5	ECK120002675	sapB	sapA	sapABCDF	1352529	1353494	1353491	reverse	-4
2	ECK120000916	sbcC	sbcD	sbcDC	411831	414977	414974	reverse	-4
2	ECK120000931	selB	selA	selAB	3756040	3757884	3757881	reverse	-4
7	ECK120015144	sgcB	sgcX	sgcXBCQAER	4528278	4528556	4528553	reverse	-4
4	ECK120002063	smtA	mukF	smtA-mukFEB	972760	973545	973542	forward	-4
2	ECK120000744	potE	speF	speF-potE	716169	717488	717485	reverse	-4
7	ECK120004460	srlA	srlE	srlAEBD-gutM-srlR-gutQ	2823854	2824417	2824414	forward	-4
5	ECK120002226	ssuB	ssuC	ssuEADCB	992500	993267	993264	reverse	-4
5	ECK120003077	ssuD	ssuA	ssuEADCB	994066	995211	995208	reverse	-4
6	ECK120003495	sufS	sufD	sufABCDSE	1757327	1758547	1758544	reverse	-4
2	ECK120000975	tag	yiaC	tag-yiaC	3711115	3711678	3711675	forward	-4
3	ECK120004369	tamA	tamB	tamAB-ytfP	4440405	4442138	4442135	forward	-4
4	ECK120002832	tauB	tauC	tauABCD	385431	386198	386195	forward	-4
4	ECK120002833	tauC	tauD	tauABCD	386195	387022	387019	forward	-4
2	ECK120001813	tehA	tehB	tehAB	1498597	1499589	1499586	forward	-4
6	ECK120001539	thiH	thiG	thiCEFSGH	4188758	4189891	4189888	reverse	-4
2	ECK120003718	thiD	thiM	thiMD	2181738	2182538	2182535	reverse	-4
3	ECK120001747	torA	torD	torCAD	1058479	1061025	1061022	forward	-4
3	ECK120001151	ttdA	ttdB	ttdABT	3204485	3205396	3205393	forward	-4
3	ECK120001436	ubiJ	ubiE	ubiEJB	4017647	4018252	4018249	forward	-4
5	ECK120001039	ugpQ	ugpC	ugpBAECQ	3585393	3586136	3586133	reverse	-4
5	ECK120001038	ugpE	ugpA	ugpBAECQ	3587205	3588050	3588047	reverse	-4
3	ECK120001601	uidB	uidA	uidABC	1690914	1692287	1692284	reverse	-4
2	ECK120001052	uvrC	uvrY	uvrYC	1990898	1992730	1992727	reverse	-4
10	ECK120001310	waaG	waaQ	waaQGPSBOJYZU	3803966	3805090	3805087	reverse	-4
12	ECK120001724	wcaI	gmm	wcaCDEF-gmd-fcl-gmm-wcaI-cpsBG-wcaJ-wzxC	2122547	2123770	2123767	reverse	-4
3	ECK120003681	wcaL	wcaK	wcaKLM	2113931	2115151	2115148	reverse	-4
3	ECK120004049	xdhB	xdhC	xdhABC	3000636	3001514	3001511	forward	-4
2	ECK120002332	yabP	yabQ	yabPQ	58474	59124	59121	forward	-4
2	ECK120002196	yadG	yadH	yadGH	142779	143705	143702	forward	-4
3	ECK120002718	yaeQ	arfB	yaeQ-arfB-nlpE	214291	214836	214833	forward	-4
2	ECK120001600	ybbA	ybbP	ybbAP	518957	519643	519640	forward	-4
5	ECK120002913	ybcO	rusA	ybcN-ninE-ybcO-rusA-ylcG	572307	572597	572594	forward	-4
5	ECK120002914	rusA	ylcG	ybcN-ninE-ybcO-rusA-ylcG	572594	572956	572953	forward	-4
2	ECK120002095	ybeM_1	ybeM_2	ybeM_1M_2	657254	657481	657478	forward	-4
2	ECK120002959	ybeR	djlB	ybeR-djlB	675934	676641	676638	forward	-4
2	ECK120002962	ybeU	djlC	ybeU-djlC	678731	679438	679435	forward	-4
4	ECK120002969	ybeY	ybeZ	ybeZYX-lnt	691097	691564	691561	reverse	-4
2	ECK120002976	ybfO	ybfC	ybfOC	733443	734876	734873	forward	-4
2	ECK120001094	ybgA	phr	ybgA-phr	738224	738733	738730	forward	-4
4	ECK120001096	ybgC	tolQ	ybgC-tolQRA	773975	774379	774376	forward	-4
3	ECK120002985	ybgO	ybgP	ybgQPO	747144	748205	748202	reverse	-4
3	ECK120003006	clsB	ybhP	ybhP-clsB-ybhN	821721	822962	822959	reverse	-4
2	ECK120003051	ybjQ	amiD	ybjQ-amiD	903816	904139	904136	forward	-4
4	ECK120000606	msbA	lpxK	ycaI-msbA-lpxK-ycaQ	965844	967592	967589	forward	-4
2	ECK120003072	ycaR	kdsB	ycaR-kdsB	969896	970078	970075	forward	-4
2	ECK120026453	ychE_2	yhcF	ychE_2-yhcF	3364703	3364951	3364948	forward	-4
2	ECK120000126	btuR	yciK	yciK-btuR	1325791	1326381	1326378	reverse	-4
3	ECK120003229	yciV	yciO	yciVOQ	1321244	1322125	1322122	forward	-4
11	ECK120003248	ycjS	ycjT	ycjMNOPQRSTUV-ymjB	1374856	1375911	1375908	forward	-4
11	ECK120003249	ycjT	ycjU	ycjMNOPQRSTUV-ymjB	1375908	1378175	1378172	forward	-4
3	ECK120003254	ycjX	ycjF	ycjXF-tyrR	1382141	1383538	1383535	forward	-4
3	ECK120003298	ydbH	ynbE	ydbH-ynbE-ydbL	1441075	1443714	1443711	forward	-4
6	ECK120003487	ydhU	ydhX	ydhYVWXUT	1747587	1748372	1748369	reverse	-4
3	ECK120003500	menI	ydiJ	ydiJ-menI-ydiH	1763246	1763656	1763653	reverse	-4
5	ECK120003510	ydiS	ydiT	ydiQRST-fadK	1779419	1780708	1780705	forward	-4
2	ECK120002245	yecD	yecE	yecDE	1948856	1949422	1949419	forward	-4
3	ECK120003607	cmoA	cmoB	yecN-cmoAB	1950726	1951469	1951466	forward	-4
2	ECK120001603	yedE	yedF	yedEF	2006301	2007506	2007503	forward	-4
6	ECK120003667	yeeR	yeeS	yeeRST-cbeA-cbtA-yeeW	2072803	2074335	2074332	forward	-4
6	ECK120003671	cbtA	yeeW	yeeRST-cbeA-cbtA-yeeW	2075593	2075967	2075964	forward	-4
2	ECK120002629	yoeB	yefM	yefM-yoeB	2087235	2087489	2087486	reverse	-4
2	ECK120003697	yegK	yegL	yegLK	2149735	2150496	2150493	reverse	-4
3	ECK120003713	yegT	yegU	yegTUV	2176843	2178120	2178117	forward	-4
3	ECK120003714	yegU	yegV	yegTUV	2178117	2179121	2179118	forward	-4
4	ECK120001921	yehP	yehQ	yehLMPQ	2205989	2207125	2207122	forward	-4
2	ECK120001925	yehT	yehU	yehUT	2210265	2210984	2210981	reverse	-4
6	ECK120003733	yfaT	yfaA	yfaATS_1S_2QP	2332358	2332981	2332978	reverse	-4
7	ECK120003779	yfcP	yfcQ	yfcUTSRQPO	2448073	2448612	2448609	reverse	-4
7	ECK120003780	yfcQ	yfcR	yfcUTSRQPO	2448609	2449097	2449094	reverse	-4
3	ECK120003794	yfdG	yfdH	yfdGHI	2465877	2466239	2466236	forward	-4
3	ECK120003795	yfdH	yfdI	yfdGHI	2466236	2467156	2467153	forward	-4
5	ECK120003801	yfdN	yfdO	yfdONMLK	2470409	2470903	2470900	reverse	-4
2	ECK120003848	yffM	yffN	yffMN	2559390	2559635	2559632	forward	-4
2	ECK120003850	yffO	yffP	yffOP	2560133	2560549	2560546	forward	-4
2	ECK120003982	ygbJ	ygbK	ygbJK	2859452	2860360	2860357	forward	-4
2	ECK120004000	ygcQ	ygcR	ygcRQ	2892941	2893801	2893798	reverse	-4
4	ECK120001295	ubiH	pepP	ygfB-pepP-ubiHI	3050362	3051540	3051537	reverse	-4
2	ECK120004062	ygfM	xdhD	ygfM-xdhD	3018562	3019341	3019338	forward	-4
5	ECK120004089	yggT	yggU	yggSTU-rdgB-yggW	3093842	3094408	3094405	forward	-4
3	ECK120004217	yhcD	ychE_1	yhcAD-ychE_1	3360829	3363210	3363207	forward	-4
6	ECK120004274	php	yhfW	yhfXW-php-yhfUTS	3505734	3506612	3506609	reverse	-4
3	ECK120002108	rbbA	yhiI	yhiI-rbbA-yhhJ	3624826	3627561	3627558	reverse	-4
9	ECK120002165	lyxK	sgbH	yiaKLMNO-lyxK-sgbHUE	3745107	3746603	3746600	forward	-4
3	ECK120001637	yidF	yidG	yidHGF	3853137	3853634	3853631	reverse	-4
2	ECK120001648	yidJ	yidK	yidKJ	3854934	3856427	3856424	reverse	-4
5	ECK120000203	dapF	yigA	yifL-dapF-yigA-xerC-yigB	3992785	3993609	3993606	forward	-4
5	ECK120001181	yigA	xerC	yifL-dapF-yigA-xerC-yigB	3993606	3994313	3994310	forward	-4
4	ECK120001782	yihY	dtd	yihXY-dtd-yiiD	4074169	4075041	4075038	forward	-4
4	ECK120001783	dtd	yiiD	yihXY-dtd-yiiD	4075038	4075475	4075472	forward	-4
4	ECK120001852	yjbF	yjbG	yjbEFGH	4234285	4234923	4234920	forward	-4
2	ECK120004334	yjeN	yjeO	yjeNO	4383416	4383730	4383727	forward	-4
3	ECK120004421	yjiG	yjiH	yjiHG-iadA	4557562	4558023	4558020	reverse	-4
2	ECK120004444	yjjU	yjjV	yjjUV	4610434	4611507	4611504	forward	-4
2	ECK120003133	ymdE	ycdU	ymdE-ycdU	1094767	1095069	1095066	forward	-4
2	ECK120003174	ycfZ	ymfA	ymfA-ycfZ	1179702	1180490	1180487	reverse	-4
10	ECK120003186	ymfL	ymfM	ymfTLMNROPQ-ycfK-ymfS	1202479	1203048	1203045	forward	-4
2	ECK120001940	yohJ	yohK	yohJK	2228646	2229044	2229041	forward	-4
2	ECK120003974	yqaA	yqaB	yqaBA	2814534	2814962	2814959	reverse	-4
11	ECK120004211	kdsC	lptC	yrbG-kdsDC-lptCAB-rpoN-hpf-ptsN-rapZ-npr	3340295	3340861	3340858	forward	-4
11	ECK120002046	rapZ	npr	yrbG-kdsDC-lptCAB-rpoN-hpf-ptsN-rapZ-npr	3345137	3345991	3345988	forward	-4
4	ECK120004243	yrdB	aroE	yrdD-tsaC-aroE-yrdB	3427788	3428045	3428042	reverse	-4
2	ECK120003605	znuC	znuB	znuCB	1940686	1941441	1941438	forward	-4
2	ECK120000007	zraS	zraR	zraSR	4199949	4201346	4201343	forward	-4
4	ECK120003264	abgB	abgA	abgABT-ogt	1399834	1401279	1401279	reverse	-1
2	ECK120000034	alkB	ada	ada-alkB	2306713	2307363	2307363	reverse	-1
7	ECK120003743	arnC	arnA	arnBCADTEF	2365093	2366061	2366061	forward	-1
7	ECK120003745	arnD	arnT	arnBCADTEF	2368040	2368930	2368930	forward	-1
7	ECK120016312	arnE	arnF	arnBCADTEF	2370579	2370914	2370914	forward	-1
4	ECK120001575	artM	artQ	artPIQM	900089	900757	900757	reverse	-1
4	ECK120001612	atoD	atoA	atoDAEB	2321469	2322131	2322131	forward	-1
8	ECK120000538	lpxA	lpxB	bamA-skp-lpxD-fabZ-lpxAB-rnhB-dnaE	202560	203348	203348	forward	-1
3	ECK120001668	yieL	bglH	bglH-yieLK	3897431	3898627	3898627	reverse	-1
3	ECK120000124	btuD	btuE	btuCED	1790833	1791582	1791582	reverse	-1
2	ECK120002083	cbpM	cbpA	cbpAM	1061773	1062078	1062078	reverse	-1
3	ECK120002190	zapD	coaE	coaE-zapD-yacG	111856	112599	112599	reverse	-1
4	ECK120001197	creB	creC	creABCD	4634030	4634719	4634719	forward	-1
2	ECK120004017	csdA	csdE	csdAE	2941359	2942564	2942564	forward	-1
2	ECK120016293	cydX	ybgE	cydX-ybgE	773419	773532	773532	forward	-1
5	ECK120000176	cyoD	cyoC	cyoABCDE	446941	447270	447270	reverse	-1
3	ECK120000180	cysC	cysN	cysDNC	2871409	2872014	2872014	reverse	-1
3	ECK120000185	cysI	cysJ	cysJIH	2886409	2888121	2888121	reverse	-1
5	ECK120000193	cysW	cysU	cysPUWAM	2538826	2539701	2539701	reverse	-1
5	ECK120000192	cysU	cysP	cysPUWAM	2539701	2540534	2540534	reverse	-1
3	ECK120000819	recF	dnaN	dnaAN-recF	3878171	3879244	3879244	reverse	-1
3	ECK120002604	tpke11	dnaJ	dnaK-tpke11-dnaJ	14080	14168	14168	forward	-1
2	ECK120002436	emrY	emrK	emrKY	2478660	2480198	2480198	reverse	-1
5	ECK120000254	entB	entA	entCEBAH	626917	627774	627774	forward	-1
3	ECK120002917	essD	rrrD	essD-rrrD-rzpD	576621	576836	576836	forward	-1
2	ECK120001361	fabR	yijD	fabR-yijD	4159090	4159794	4159794	forward	-1
2	ECK120003787	fadJ	fadI	fadIJ	2455037	2457181	2457181	reverse	-1
3	ECK120002007	feoB	feoC	feoABC	3538429	3540750	3540750	forward	-1
4	ECK120000298	fhuC	fhuD	fhuACDB	169778	170575	170575	forward	-1
9	ECK120002687	flgI	flgJ	flgBCDEFGHIJ	1135497	1136594	1136594	forward	-1
3	ECK120003614	flhE	flhA	flhBAE	1960604	1960996	1960996	reverse	-1
3	ECK120001355	fliS	fliT	fliDST	2003327	2003737	2003737	forward	-1
6	ECK120001599	fliH	fliI	fliFGHIJK	2013892	2014578	2014578	forward	-1
7	ECK120001202	fliO	fliP	fliLMNOPQR	2019528	2019893	2019893	forward	-1
3	ECK120000331	fruK	fruB	fruBKA	2259449	2260387	2260387	reverse	-1
4	ECK120001792	frvR	frvX	frvABXR	4086130	4087878	4087878	reverse	-1
5	ECK120003822	ypdE	ypdF	fryBC-ypdFE-fryA	2502532	2503569	2503569	reverse	-1
3	ECK120003105	gfcD	gfcC	gfcBCD	1045072	1047168	1047168	reverse	-1
6	ECK120004104	glcE	glcD	glcDEFGBA	3123492	3124544	3124544	reverse	-1
2	ECK120001907	wbbH	glf	glf-wbbH	2104084	2105250	2105250	reverse	-1
5	ECK120000370	glgA	glgC	glgBXCAP	3564623	3566056	3566056	reverse	-1
5	ECK120002351	gltL	gltK	gltI-sroC-gltJKL	683753	684478	684478	reverse	-1
5	ECK120002350	gltK	gltJ	gltI-sroC-gltJKL	684478	685152	685152	reverse	-1
4	ECK120026455	ysdC	glvG	glvCBG-ysdC	3859196	3859372	3859372	reverse	-1
4	ECK120001651	glvG	glvB	glvCBG-ysdC	3859372	3860010	3860010	reverse	-1
12	ECK120002068	gspM	gspO	gspCDEFGHIJKLMO	3463104	3463565	3463565	forward	-1
5	ECK120004474	hcaF	hcaC	hcaEFCBD	2668412	2668930	2668930	forward	-1
3	ECK120000752	prfA	prmC	hemA-prfA-prmC	1264235	1265317	1265317	forward	-1
2	ECK120000436	hipA	hipB	hipBA	1588878	1590200	1590200	reverse	-1
9	ECK120000439	hisC	hisB	hisLGDCBHAFI	2090422	2091492	2091492	forward	-1
9	ECK120000438	hisB	hisH	hisLGDCBHAFI	2091492	2092559	2092559	forward	-1
9	ECK120000443	hisH	hisA	hisLGDCBHAFI	2092559	2093149	2093149	forward	-1
4	ECK120004281	hofN	hofM	hofMNOP	3519455	3519994	3519994	reverse	-1
2	ECK120001056	valS	holC	holC-valS	4479005	4481860	4481860	reverse	-1
8	ECK120001736	hybD	hybC	hybOABCDEFG	3138814	3139308	3139308	reverse	-1
9	ECK120000473	hycG	hycF	hycABCDEFGHI	2841465	2842232	2842232	reverse	-1
12	ECK120001133	hyfA	hyfB	hyfABCDEFGHIJR-focB	2599223	2599840	2599840	forward	-1
6	ECK120000478	hypC	hypD	hypABCDE-fhlA	2849886	2850158	2850158	forward	-1
2	ECK120001749	ispF	ispD	ispDF	2869323	2869802	2869802	reverse	-1
2	ECK120002645	sroE	ispG	ispG-sroE	2638617	2638708	2638708	reverse	-1
6	ECK120001041	uhpB	uhpA	ivbL-ilvBN-uhpABC	3846657	3848159	3848159	reverse	-1
4	ECK120000506	kdpA	kdpF	kdpFABC	726282	727955	727955	reverse	-1
3	ECK120002444	kefB	kefG	kefGB-yheV	3476824	3478629	3478629	reverse	-1
2	ECK120002628	ydaE	kilR	kilR-ydaE	1415862	1416032	1416032	reverse	-1
4	ECK120000800	pyrF	yciH	lapAB-pyrF-yciH	1339945	1340682	1340682	forward	-1
5	ECK120001529	leuB	leuA	leuLABCD	80867	81958	81958	reverse	-1
5	ECK120001378	holA	lptE	leuS-lptE-holA-nadD-cobC	669797	670828	670828	reverse	-1
3	ECK120001887	lldP	lldR	lldPRD	3775422	3777077	3777077	forward	-1
3	ECK120001267	ispE	lolB	lolB-ispE-prs	1261249	1262100	1262100	reverse	-1
3	ECK120003170	lolD	lolE	lolCDE	1175842	1176543	1176543	forward	-1
3	ECK120003290	stfR	tfaR	lomR_2-stfR-tfaR	1427073	1430435	1430435	forward	-1
6	ECK120000684	pdxA	surA	lptD-surA-pdxA-rsmA-apaGH	52427	53416	53416	reverse	-1
2	ECK120004383	lptF	lptG	lptFG	4484241	4485341	4485341	forward	-1
7	ECK120003390	lsrC	lsrD	lsrACDBFG-tam	1601043	1602071	1602071	forward	-1
2	ECK120000568	mcrC	mcrB	mcrBC	4574935	4575981	4575981	reverse	-1
6	ECK120003699	mdtA	mdtB	mdtABCD-baeSR	2152040	2153287	2153287	forward	-1
3	ECK120001880	mdtO	mdtN	mdtNOP	4299050	4301101	4301101	reverse	-1
6	ECK120001486	menC	menB	menFDHBCE	2373022	2373984	2373984	reverse	-1
8	ECK120001159	truB	rbfA	metY-rimP-nusA-infB-rbfA-truB-rpsO-pnp	3309855	3310799	3310799	reverse	-1
5	ECK120004208	mlaB	mlaC	mlaFEDCB	3334985	3335278	3335278	reverse	-1
3	ECK120002283	modA	modB	modABC	794312	795085	795085	forward	-1
2	ECK120000150	moeB	moeA	moeAB	863603	864352	864352	reverse	-1
16	ECK120000613	murD	ftsW	mraZ-rsmH-ftsLI-murEF-mraY-murD-ftsW-murGC-ddlB-ftsQAZ-lpxC	97087	98403	98403	forward	-1
3	ECK120000603	mreD	mreC	mreBCD	3396409	3396897	3396897	reverse	-1
3	ECK120000609	mtlD	mtlR	mtlADR	3772447	3773595	3773595	forward	-1
4	ECK120000634	narJ	narI	narGHJI	1284362	1285072	1285072	forward	-1
4	ECK120000638	narW	narY	narZYWV	1534638	1535333	1535333	reverse	-1
6	ECK120001981	nikA	nikB	nikABCDER	3611690	3613264	3613264	forward	-1
6	ECK120001983	nikC	nikD	nikABCDER	3614205	3615038	3615038	forward	-1
3	ECK120003409	tfaQ	ydfN	nohA-ydfN-tfaQ	1632334	1632909	1632909	reverse	-1
3	ECK120000654	nrdB	yfaE	nrdAB-yfaE	2345406	2346536	2346536	forward	-1
5	ECK120004135	yqiA	cpdA	nudF-yqiB-cpdA-yqiA-parE	3173447	3174028	3174028	reverse	-1
11	ECK120003308	paaF	paaG	paaABCDEFGHIJK	1455521	1456288	1456288	forward	-1
11	ECK120003311	paaI	paaJ	paaABCDEFGHIJK	1458495	1458917	1458917	forward	-1
4	ECK120000447	truA	usg	pdxB-usg-truA-dedA	2432846	2433658	2433658	reverse	-1
4	ECK120000690	pepQ	yigZ	pepQ-yigZ-trkH-hemG	4029184	4030515	4030515	forward	-1
15	ECK120000715	phnN	phnM	phnCDE_1E_2FGHIJKLMNOP	4313548	4314105	4314105	reverse	-1
15	ECK120000710	phnI	phnH	phnCDE_1E_2FGHIJKLMNOP	4317622	4318686	4318686	reverse	-1
2	ECK120000723	phoQ	phoP	phoPQ	1187539	1188999	1188999	reverse	-1
2	ECK120000944	prlF	yhaV	prlF-yhaV	3275024	3275359	3275359	forward	-1
6	ECK120003776	epmC	yfcA	prmB-aroC-mepA-yfcA-epmC-yfcL	2442225	2442773	2442773	reverse	-1
6	ECK120001128	yfcA	mepA	prmB-aroC-mepA-yfcA-epmC-yfcL	2442773	2443582	2443582	reverse	-1
5	ECK120000768	pspB	pspC	pspABCDE	1366825	1367049	1367049	forward	-1
5	ECK120000773	pstA	pstC	pstSCAB-phoU	3906572	3907462	3907462	reverse	-1
3	ECK120000817	recD	recB	ptrA-recBD	2948657	2950483	2950483	reverse	-1
2	ECK120000789	purM	purN	purMN	2619219	2620256	2620256	forward	-1
4	ECK120001224	mazF	mazE	relA-mazEFG	2908778	2909113	2909113	reverse	-1
3	ECK120001115	relE	relB	relBE-hokD	1643370	1643657	1643657	reverse	-1
5	ECK120001904	rfbC	rfbA	rfbBDACX	2107605	2108162	2108162	reverse	-1
5	ECK120002272	rfbD	rfbB	rfbBDACX	2109101	2110000	2110000	reverse	-1
12	ECK120001415	wecC	rffG	rfe-wzzE-wecBC-rffGHCA-wzxE-rffT-wzyE-rffM	3969283	3970545	3970545	forward	-1
4	ECK120001705	ybbC	ylbH	rhsD-ybbC-ylbH-ybbD	526805	527173	527173	forward	-1
5	ECK120000485	ileS	lspA	ribF-ileS-lspA-fkpB-ispH	22391	25207	25207	forward	-1
5	ECK120000241	acpS	pdxJ	rnc-era-recO-pdxJ-acpS	2698640	2699020	2699020	reverse	-1
4	ECK120003918	rseB	rseA	rpoE-rseABC	2705820	2706776	2706776	reverse	-1
11	ECK120000907	rpsQ	rpmC	rpsJ-rplCDWB-rpsS-rplV-rpsC-rplP-rpmC-rpsQ	3446336	3446590	3446590	reverse	-1
11	ECK120000878	rpmC	rplP	rpsJ-rplCDWB-rpsS-rplV-rpsC-rplP-rpmC-rpsQ	3446590	3446781	3446781	reverse	-1
7	ECK120003122	rutB	rutA	rutABCDEFG	1071394	1072086	1072086	reverse	-1
5	ECK120002183	sapD	sapC	sapABCDF	1350660	1351652	1351652	reverse	-1
8	ECK120000923	sdhD	sdhA	sdhCDAB-sucABCD	754783	755130	755130	forward	-1
8	ECK120000970	sucC	sucD	sdhCDAB-sucABCD	762237	763403	763403	forward	-1
4	ECK120001227	mukE	mukB	smtA-mukFEB	974872	975549	975549	forward	-1
2	ECK120001104	tfaE	stfE	stfE-tfaE	1207740	1208342	1208342	reverse	-1
6	ECK120001536	thiE	thiC	thiCEFSGH	4191592	4192227	4192227	reverse	-1
4	ECK120000998	tolC	ygiA	tolC-ygiABC	3176137	3177618	3177618	forward	-1
3	ECK120001748	torC	torA	torCAD	1057307	1058479	1058479	forward	-1
2	ECK120002296	yggL	trmI	trmI-yggL	3099829	3100155	3100155	reverse	-1
6	ECK120001013	trpA	trpB	trpLEDCBA	1314440	1315246	1315246	reverse	-1
6	ECK120001016	trpD	trpE	trpLEDCBA	1317813	1319408	1319408	reverse	-1
6	ECK120004354	ulaE	ulaF	ulaABCDEF	4420869	4421723	4421723	forward	-1
2	ECK120001046	umuD	umuC	umuDC	1229990	1230409	1230409	forward	-1
10	ECK120001321	waaO	waaB	waaQGPSBOJYZU	3800062	3801081	3801081	reverse	-1
4	ECK120000501	ispA	xseB	xseB-ispA-dxs-yajO	439426	440325	440325	reverse	-1
4	ECK120002804	yahF	yahG	yahDEFG	336002	337549	337549	forward	-1
2	ECK120001088	ybaB	recR	ybaB-recR	493300	493629	493629	forward	-1
5	ECK120002911	ybcN	ninE	ybcN-ninE-ybcO-rusA-ylcG	571689	572144	572144	forward	-1
3	ECK120003005	ybhN	clsB	ybhP-clsB-ybhN	820765	821721	821721	reverse	-1
5	ECK120003012	ybhG	ybiH	ybiH-ybhGFSR	828197	829195	829195	reverse	-1
2	ECK120003042	ybjI	ybjJ	ybjJI	884539	885354	885354	reverse	-1
11	ECK120003251	ycjV	ymjB	ycjMNOPQRSTUV-ymjB	1378845	1379813	1379813	forward	-1
4	ECK120048857	ymjD	ycjY	ycjY-ymjDC-mpaA	1388892	1388957	1388957	reverse	-1
8	ECK120003460	rsxA	rsxB	ydgK-rsxABCDGE-nth	1703791	1704372	1704372	forward	-1
8	ECK120003465	rsxE	nth	ydgK-rsxABCDGE-nth	1708852	1709547	1709547	forward	-1
3	ECK120003473	ydhJ	ydhK	ydhIJK	1719288	1720145	1720145	forward	-1
7	ECK120003535	ydjZ	ynjA	ydjXYZ-ynjABCD	1832832	1833539	1833539	forward	-1
7	ECK120003538	ynjC	ynjD	ydjXYZ-ynjABCD	1835281	1836771	1836771	forward	-1
2	ECK120003642	yedV	yedW	yedWV	2034818	2036176	2036176	reverse	-1
4	ECK120001955	yejB	yejE	yejABEF	2272201	2273295	2273295	forward	-1
7	ECK120003781	yfcR	yfcS	yfcUTSRQPO	2449094	2449606	2449606	reverse	-1
5	ECK120003800	yfdM	yfdN	yfdONMLK	2470134	2470409	2470409	reverse	-1
3	ECK120003806	yfdS	yfdT	yfdRST	2473533	2473895	2473895	forward	-1
4	ECK120003938	ypjK	yfjS	yfjR-ypjK-yfjST	2768467	2768703	2768703	forward	-1
2	ECK120004067	ygfS	ygfT	ygfTS	3026546	3027034	3027034	reverse	-1
2	ECK120004116	yghX_1	yghX_2	yghX_2X_1	3144878	3145288	3145288	reverse	-1
4	ECK120004258	tusC	tusD	yheO-tusDCB	3472995	3473354	3473354	reverse	-1
4	ECK120004259	tusD	yheO	yheO-tusDCB	3473354	3473740	3473740	reverse	-1
3	ECK120002423	yheS	yheT	yheSTU	3479311	3481224	3481224	forward	-1
6	ECK120004275	yhfW	yhfX	yhfXW-php-yhfUTS	3506609	3507835	3507835	reverse	-1
5	ECK120004299	yhhZ	yrhA	yhhZ-yrhA-insA-6AB-6B-6	3579886	3581064	3581064	forward	-1
3	ECK120001703	yhhJ	rbbA	yhiI-rbbA-yhhJ	3623702	3624826	3624826	reverse	-1
4	ECK120002442	gpsA	secB	yibN-grxC-secB-gpsA	3780665	3781684	3781684	reverse	-1
5	ECK120001058	xerC	yigB	yifL-dapF-yigA-xerC-yigB	3994310	3995206	3995206	forward	-1
4	ECK120001853	yjbG	yjbH	yjbEFGH	4234920	4235657	4235657	forward	-1
2	ECK120016286	ykgO	ykgM	ykgMO	311598	311738	311738	reverse	-1
10	ECK120003189	ymfR	ymfO	ymfTLMNROPQ-ycfK-ymfS	1204772	1204954	1204954	forward	-1
4	ECK120003320	ynbA	ynbB	ynbABCD	1475645	1476250	1476250	forward	-1
2	ECK120003398	yneG	yneH	yneHG	1609990	1610349	1610349	reverse	-1
3	ECK120004012	truC	yqcC	yqcC-truC-yqcA	2921024	2921806	2921806	reverse	-1
2	ECK120004085	yqgE	yqgF	yqgEF	3090959	3091522	3091522	forward	-1
6	ECK120004185	agaD	agaI	agaS-kbaY-agaBCDI	3283500	3284291	3284292	forward	0
2	ECK120000010	cydC	cydD	cydDC	926697	928418	928419	reverse	0
3	ECK120000235	dnaK	tpke11	dnaK-tpke11-dnaJ	12163	14079	14080	forward	0
5	ECK120000284	fecE	fecD	fecABCDE	4508713	4509480	4509481	reverse	0
2	ECK120026458	insB-7_1	insB-7_2	insB-7_1B-7_2	4516744	4517037	4517038	forward	0
6	ECK120003700	mdtB	mdtC	mdtABCD-baeSR	2153287	2156409	2156410	forward	0
6	ECK120003701	mdtC	mdtD	mdtABCD-baeSR	2156410	2159487	2159488	forward	0
5	ECK120004137	yqiB	nudF	nudF-yqiB-cpdA-yqiA-parE	3174880	3175302	3175303	reverse	0
15	ECK120000708	phnG	phnF	phnCDE_1E_2FGHIJKLMNOP	4319267	4319719	4319720	reverse	0
4	ECK120000988	thrB	thrC	thrLABC	2801	3733	3734	forward	0
6	ECK120001015	trpC	trpD	trpLEDCBA	1316451	1317812	1317813	reverse	0
5	ECK120003341	ydcT	ydcU	ydcSTUV-patD	1510841	1511854	1511855	forward	0
8	ECK120003462	rsxC	rsxD	ydgK-rsxABCDGE-nth	1704943	1707165	1707166	forward	0
2	ECK120003645	yedY	yedZ	yedYZ	2037502	2038506	2038507	forward	0
4	ECK120001954	yejA	yejB	yejABEF	2270386	2272200	2272201	forward	0
6	ECK120003730	yfaQ	yfaS_2	yfaATS_1S_2QP	2326170	2327819	2327820	reverse	0
2	ECK120003894	pbpC	yfhM	yfhM-pbpC	2643035	2645347	2645348	reverse	0
2	ECK120003178	ymfD	ymfE	ymfED	1196090	1196755	1196756	reverse	0
7	ECK120002398	cas2	cas1	casABCDE12	2876591	2876875	2876877	reverse	1
3	ECK120000189	cysN	cysD	cysDNC	2872014	2873441	2873443	reverse	1
6	ECK120003369	ddpB	ddpA	ddpXABCDF	1557931	1558953	1558955	reverse	1
3	ECK120000227	dmsB	dmsC	dmsABC	942637	943254	943256	forward	1
2	ECK120002418	ybcJ	folD	folD-ybcJ	555884	556096	556098	reverse	1
5	ECK120000344	fucK	fucU	fucPIKUR	2935460	2936908	2936910	forward	1
2	ECK120001238	gspB	gspA	gspAB	3451530	3451949	3451951	reverse	1
3	ECK120004009	gudX	gudP	gudPXD	2917428	2918768	2918770	reverse	1
4	ECK120001299	fdx	hscA	hscBA-fdx-iscX	2654770	2655105	2655107	reverse	1
5	ECK120002757	afuB	insAB-2	insAB-2A-2B-2-afuBC	278038	278400	278402	reverse	1
6	ECK120004142	yqiH	yqiI	insC-5CD-5D-5-yqiGHI	3187903	3188652	3188654	forward	1
5	ECK120002957	nadD	holA	leuS-lptE-holA-nadD-cobC	669154	669795	669797	reverse	1
2	ECK120016314	ypeB	ligA	ligA-ypeB	2525963	2526181	2526183	reverse	1
5	ECK120000529	livF	livG	livKHMGF	3590747	3591460	3591462	reverse	1
6	ECK120004469	mhpA	mhpB	mhpABCDFE	367835	369499	369501	forward	1
5	ECK120001545	moaD	moaE	moaABCDE	818271	818516	818518	forward	1
2	ECK120004129	mqsA	mqsR	mqsRA	3165873	3166268	3166270	reverse	1
16	ECK120001072	mraZ	rsmH	mraZ-rsmH-ftsLI-murEF-mraY-murD-ftsW-murGC-ddlB-ftsQAZ-lpxC	89634	90092	90094	forward	1
16	ECK120000208	ddlB	ftsQ	mraZ-rsmH-ftsLI-murEF-mraY-murD-ftsW-murGC-ddlB-ftsQAZ-lpxC	102233	103153	103155	forward	1
11	ECK120003309	paaG	paaH	paaABCDEFGHIJK	1456288	1457076	1457078	forward	1
4	ECK120003126	pgaD	pgaC	pgaABCD	1085329	1085742	1085744	reverse	1
15	ECK120000717	phnP	phnO	phnCDE_1E_2FGHIJKLMNOP	4312367	4313125	4313127	reverse	1
5	ECK120000033	puuC	puuB	puuDRCBE	1360767	1362254	1362256	forward	1
6	ECK120003271	intR	ydaQ	recET-ralR-ydaCQ-intR	1410024	1411259	1411261	reverse	1
12	ECK120001419	rffA	wzxE	rfe-wzzE-wecBC-rffGHCA-wzxE-rffT-wzyE-rffM	3973169	3974299	3974301	forward	1
5	ECK120001068	fkpB	ispH	ribF-ileS-lspA-fkpB-ispH	25826	26275	26277	forward	1
5	ECK120002184	sapF	sapD	sapABCDF	1349852	1350658	1350660	reverse	1
2	ECK120000928	secE	nusG	secE-nusG	4175381	4175764	4175766	forward	1
6	ECK120001538	thiG	thiS	thiCEFSGH	4189888	4190658	4190660	reverse	1
4	ECK120000987	thrA	thrB	thrLABC	337	2799	2801	forward	1
5	ECK120001037	ugpC	ugpE	ugpBAECQ	3586133	3587203	3587205	reverse	1
12	ECK120003683	wzxC	wcaJ	wcaCDEF-gmd-fcl-gmm-wcaI-cpsBG-wcaJ-wzxC	2116704	2118182	2118184	reverse	1
2	ECK120002824	yaiO	yaiX	yaiXO	379293	380066	380068	reverse	1
3	ECK120001273	ydfA	ydfB	ydfABC	1646532	1646687	1646689	forward	1
4	ECK120001956	yejE	yejF	yejABEF	2273295	2274320	2274322	forward	1
7	ECK120003778	yfcO	yfcP	yfcUTSRQPO	2447250	2448071	2448073	reverse	1
2	ECK120001395	yfeC	yfeD	yfeCD	2516489	2516833	2516835	forward	1
2	ECK120004096	yghD	yghE	yghED	3108612	3109148	3109150	reverse	1
2	ECK120003146	ymdB	clsC	ymdB-clsC	1105043	1105576	1105578	forward	1
10	ECK120002416	ycfK	ymfS	ymfTLMNROPQ-ycfK-ymfS	1206724	1207353	1207355	forward	1
5	ECK120003436	ynfG	ynfH	ynfEFGH-dmsD	1661014	1661631	1661633	forward	1
7	ECK120003992	casD	casC	casABCDE12	2878396	2879070	2879073	reverse	2
4	ECK120002736	yafN	yafO	dinB-yafNOP	252005	252298	252301	forward	2
2	ECK120002729	yafQ	dinJ	dinJ-yafQ	245961	246239	246242	reverse	2
5	ECK120000253	entA	entH	entCEBAH	627774	628520	628523	forward	2
4	ECK120000293	fes	ybdZ	fes-ybdZ-entF-fepE	611960	613162	613165	forward	2
2	ECK120000313	flhC	flhD	flhDC	1975290	1975868	1975871	reverse	2
7	ECK120000318	fliN	fliO	fliLMNOPQR	2019112	2019525	2019528	forward	2
3	ECK120000334	ftsE	ftsY	ftsYEX	3600102	3600770	3600773	reverse	2
4	ECK120000427	hemY	hemX	hemCDXY	3984709	3985905	3985908	reverse	2
6	ECK120002067	hinT	ycfL	hinT-ycfL-lpoB-thiK-nagZ-ycfP	1161108	1161467	1161470	forward	2
8	ECK120001733	hybA	hybO	hybOABCDEFG	3142176	3143162	3143165	reverse	2
9	ECK120000470	hycD	hycC	hycABCDEFGHI	2844511	2845434	2845437	reverse	2
5	ECK120003031	gsiC	gsiD	iaaA-gsiABCD	870190	871110	871113	forward	2
2	ECK120000493	ilvI	ilvH	ilvIH	85630	87354	87357	forward	2
8	ECK120048853	ilvX	ilvG_1	ilvLXG_1G_2MEDA	3948530	3948580	3948583	forward	2
8	ECK120000489	ilvD	ilvA	ilvLXG_1G_2MEDA	3951501	3953351	3953354	forward	2
6	ECK120004040	ygeM	ygeN	insCD-4C-4D-4-ygeONM	2993336	2993767	2993770	reverse	2
5	ECK120001528	leuC	leuB	leuLABCD	79464	80864	80867	reverse	2
6	ECK120000043	apaG	rsmA	lptD-surA-pdxA-rsmA-apaGH	51229	51606	51609	reverse	2
3	ECK120002551	valT	lysW	lysT-valT-lysW	779988	780063	780066	forward	2
2	ECK120000575	metB	metL	metBL	4126695	4127855	4127858	forward	2
5	ECK120001544	moaB	moaC	moaABCDE	817278	817790	817793	forward	2
3	ECK120000002	modB	modC	modABC	795085	795774	795777	forward	2
16	ECK120000597	mraY	murD	mraZ-rsmH-ftsLI-murEF-mraY-murD-ftsW-murGC-ddlB-ftsQAZ-lpxC	96002	97084	97087	forward	2
13	ECK120001991	nuoE	nuoC	nuoABCEFGHIJKLMN	2399574	2400074	2400077	reverse	2
5	ECK120001449	pabC	yceG	pabC-yceG-tmk-holB-ycfH	1152523	1153332	1153335	forward	2
2	ECK120002352	lpxH	ppiB	ppiB-lpxH	552441	553163	553166	reverse	2
12	ECK120001420	wzyE	rffM	rfe-wzzE-wecBC-rffGHCA-wzxE-rffT-wzyE-rffM	3976624	3977976	3977979	forward	2
5	ECK120000600	mrdB	mrdA	rsfS-rlmH-mrdAB-rlpA	664424	665536	665539	reverse	2
2	ECK120001942	sanA	yeiS	sanA-yeiS	2230900	2231619	2231622	forward	2
3	ECK120004370	tamB	ytfP	tamAB-ytfP	4442135	4445914	4445917	forward	2
6	ECK120000143	cheB	cheR	tar-tap-cheRBYZ	1965476	1966525	1966528	reverse	2
4	ECK120004315	tatB	tatC	tatABCD	4020241	4020756	4020759	forward	2
12	ECK120000157	cpsB	wcaI	wcaCDEF-gmd-fcl-gmm-wcaI-cpsBG-wcaJ-wzxC	2121108	2122544	2122547	reverse	2
12	ECK120001723	gmm	fcl	wcaCDEF-gmd-fcl-gmm-wcaI-cpsBG-wcaJ-wzxC	2123767	2124246	2124249	reverse	2
12	ECK120001722	fcl	gmd	wcaCDEF-gmd-fcl-gmm-wcaI-cpsBG-wcaJ-wzxC	2124249	2125214	2125217	reverse	2
5	ECK120003689	wcaB	wcaA	wza-wzb-wzc-wcaAB	2130091	2130579	2130582	reverse	2
5	ECK120003691	wzc	wzb	wza-wzb-wzc-wcaAB	2131514	2133676	2133679	reverse	2
2	ECK120002869	ybaS	ybaT	ybaST	510865	511797	511800	forward	2
3	ECK120003472	ydhI	ydhJ	ydhIJK	1719049	1719285	1719288	forward	2
5	ECK120003511	ydiT	fadK	ydiQRST-fadK	1780705	1780998	1781001	forward	2
4	ECK120003736	yfaW	yfaX	yfaXWVU	2358231	2359448	2359451	reverse	2
2	ECK120004060	ygfK	ssnA	ygfK-ssnA	3014082	3017180	3017183	forward	2
9	ECK120002162	yiaM	yiaN	yiaKLMNO-lyxK-sgbHUE	3742351	3742824	3742827	forward	2
2	ECK120001700	yibH	yibI	yibIH	3768266	3769402	3769405	reverse	2
9	ECK120000429	hflK	hflC	yjeF-tsaE-amiB-mutL-miaA-hfq-hflXKC	4400061	4401320	4401323	forward	2
4	ECK120004346	yjfM	yjfC	yjfKLMC	4410410	4411048	4411051	forward	2
4	ECK120000231	dnaC	dnaT	yjjB-dnaTC-yjjA	4598261	4598998	4599001	reverse	2
2	ECK120016922	ymiA	yciX	ymiA-yciX	1333148	1333312	1333315	forward	2
4	ECK120004165	yqjD	yqjE	yqjCDEK	3247397	3247702	3247705	forward	2
2	ECK120001755	amiA	hemF	amiA-hemF	2550374	2551243	2551247	forward	3
7	ECK120003742	arnB	arnC	arnBCADTEF	2363932	2365089	2365093	forward	3
8	ECK120000448	skp	lpxD	bamA-skp-lpxD-fabZ-lpxAB-rnhB-dnaE	200482	200967	200971	forward	3
8	ECK120001257	fabZ	lpxA	bamA-skp-lpxD-fabZ-lpxAB-rnhB-dnaE	202101	202556	202560	forward	3
6	ECK120002947	citX	citF	citCDEFXG	646707	647258	647262	reverse	3
9	ECK120002679	flgB	flgC	flgBCDEFGHIJ	1130241	1130657	1130661	forward	3
4	ECK120000356	galK	galT	galETKM	788054	789202	789206	reverse	3
6	ECK120002276	gatC	gatB	gatYZABCD	2170945	2172300	2172304	reverse	3
3	ECK120002343	gntU	gntK	gntRKU	3573744	3575084	3575088	reverse	3
3	ECK120002178	envC	yibQ	gpmM-envC-yibQ	3784861	3786120	3786124	forward	3
2	ECK120001285	purB	hflD	hflD-purB	1189839	1191209	1191213	reverse	3
6	ECK120000476	hypA	hypB	hypABCDE-fhlA	2848669	2849019	2849023	forward	3
6	ECK120000495	ilvN	ilvB	ivbL-ilvBN-uhpABC	3848825	3849115	3849119	reverse	3
3	ECK120000591	minE	minD	minCDE	1223502	1223768	1223772	reverse	3
3	ECK120003837	murQ	murP	murQP-yfeW	2543795	2544691	2544695	forward	3
6	ECK120001291	nrdR	ribD	nrdR-ribDE-nusB-thiL-pgpA	432226	432675	432679	forward	3
2	ECK120000676	pabB	nudL	pabB-nudL	1892829	1894190	1894194	forward	3
6	ECK120000573	mepA	aroC	prmB-aroC-mepA-yfcA-epmC-yfcL	2443582	2444406	2444410	reverse	3
3	ECK120000796	pyrB	pyrL	pyrLBI	4469483	4470418	4470422	reverse	3
6	ECK120000809	rbsK	rbsR	rbsDACBKR	3935317	3936246	3936250	forward	3
4	ECK120002097	waaF	waaC	rfaD-waaFCL	3792952	3793998	3794002	forward	3
6	ECK120000863	rplK	rplA	rplKAJL-rpoBC	4176470	4176898	4176902	forward	3
12	ECK120000867	rplO	rpmD	rplNXE-rpsNH-rplFR-rpsE-rpmD-rplO-secY-rpmJ	3442127	3442561	3442565	reverse	3
12	ECK120000879	rpmD	rpsE	rplNXE-rpsNH-rplFR-rpsE-rpmD-rplO-secY-rpmJ	3442565	3442744	3442748	reverse	3
5	ECK120001229	rlmH	rsfS	rsfS-rlmH-mrdAB-rlpA	667471	667938	667942	reverse	3
2	ECK120003453	rstA	rstB	rstAB	1680174	1680902	1680906	forward	3
2	ECK120004292	rtcA	rtcB	rtcBA	3553855	3554871	3554875	reverse	3
5	ECK120002458	argV	serV	serV-argVYZQ	2816495	2816571	2816575	reverse	3
7	ECK120000959	srlB	srlD	srlAEBD-gutM-srlR-gutQ	2825384	2825755	2825759	forward	3
4	ECK120004314	tatA	tatB	tatABCD	4019968	4020237	4020241	forward	3
8	ECK120000499	infC	thrS	thrS-infC-rpmI-rplT-pheMST-ihfA	1798120	1798662	1798666	reverse	3
2	ECK120002989	valZ	lysY	valZ-lysY	780291	780366	780370	forward	3
2	ECK120001594	yafD	yafE	yafDE	231122	231922	231926	forward	3
4	ECK120000999	tolQ	tolR	ybgC-tolQRA	774376	775068	775072	forward	3
2	ECK120001752	yceI	yceJ	yceJI	1117124	1117699	1117703	reverse	3
3	ECK120003225	ychQ	ychA	ychQA-kdsA	1266147	1266539	1266543	forward	3
8	ECK120003463	rsxD	rsxG	ydgK-rsxABCDGE-nth	1707166	1708224	1708228	forward	3
8	ECK120003464	rsxG	rsxE	ydgK-rsxABCDGE-nth	1708228	1708848	1708852	forward	3
6	ECK120003486	ydhT	ydhU	ydhYVWXUT	1746771	1747583	1747587	reverse	3
6	ECK120003489	ydhW	ydhV	ydhYVWXUT	1749101	1749748	1749752	reverse	3
2	ECK120003569	yoaG	yeaR	yeaR-yoaG	1877427	1877609	1877613	reverse	3
3	ECK120001131	yffB	dapE	yffB-dapE-ypfN	2589269	2589625	2589629	forward	3
9	ECK120002164	yiaO	lyxK	yiaKLMNO-lyxK-sgbHUE	3744117	3745103	3745107	forward	3
2	ECK120001863	yjbQ	yjbR	yjbQR	4268261	4268677	4268681	forward	3
10	ECK120003192	ymfQ	ycfK	ymfTLMNROPQ-ycfK-ymfS	1206136	1206720	1206724	forward	3
3	ECK120003600	yebZ	yobA	yobA-yebZY	1921743	1922615	1922619	reverse	3
2	ECK120004162	yqjA	mzrA	yqjA-mzrA	3245795	3246457	3246461	forward	3
4	ECK120003141	csgE	csgD	csgDEFG	1101375	1101764	1101769	reverse	4
3	ECK120000236	dnaN	dnaA	dnaAN-recF	3879244	3880344	3880349	reverse	4
4	ECK120003417	ydfR	essQ	essQ-ydfR-rrrQ-ydfP	1638078	1638389	1638394	reverse	4
2	ECK120001557	evgA	evgS	evgAS	2481777	2482391	2482396	forward	4
3	ECK120003158	flgN	flgM	flgAMN	1128637	1129053	1129058	reverse	4
7	ECK120000316	fliL	fliM	fliLMNOPQR	2017642	2018106	2018111	forward	4
6	ECK120004103	glcG	glcF	glcDEFGBA	3121849	3122253	3122258	reverse	4
2	ECK120000392	glpQ	glpT	glpTQ	2347957	2349033	2349038	reverse	4
12	ECK120003874	hyfE	hyfF	hyfABCDEFGHIJR-focB	2604284	2604934	2604939	forward	4
5	ECK120002386	mlaD	mlaE	mlaFEDCB	3335932	3336483	3336488	reverse	4
4	ECK120000142	cheA	motB	motAB-cheAW	1971384	1973348	1973353	reverse	4
3	ECK120003838	murP	yfeW	murQP-yfeW	2544695	2546119	2546124	forward	4
4	ECK120001928	yehW	yehX	osmF-yehYXW	2213767	2214498	2214503	reverse	4
2	ECK120001466	ppk	ppx	ppk-ppx	2621066	2623132	2623137	forward	4
2	ECK120003090	pqiA	pqiB	pqiAB	1011224	1012477	1012482	forward	4
6	ECK120000805	rbsA	rbsC	rbsDACBKR	3931801	3933306	3933311	forward	4
12	ECK120001418	rffC	rffA	rfe-wzzE-wecBC-rffGHCA-wzxE-rffT-wzyE-rffM	3972619	3973164	3973169	forward	4
4	ECK120000755	priB	rpsR	rpsF-priB-rpsR-rplI	4423543	4423857	4423862	forward	4
8	ECK120000433	ihfA	pheT	thrS-infC-rpmI-rplT-pheMST-ihfA	1793277	1793576	1793581	reverse	4
4	ECK120002556	valY	lysV	valUXY-lysV	2519195	2519270	2519275	forward	4
2	ECK120002553	valV	valW	valVW	1744459	1744535	1744540	forward	4
3	ECK120001003	topB	selD	ydjA-selD-topB	1843023	1844984	1844989	reverse	4
6	ECK120003547	ydjH	ydjI	ydjLKJIHG	1854005	1854952	1854957	reverse	4
7	ECK120003533	ydjX	ydjY	ydjXYZ-ynjABCD	1831425	1832135	1832140	forward	4
6	ECK120003729	yfaP	yfaQ	yfaATS_1S_2QP	2325389	2326165	2326170	reverse	4
2	ECK120003984	ygbL	ygbM	ygbLM	2861615	2862253	2862258	forward	4
3	ECK120004406	yjhH	yjhI	yjhIHG	4522128	4523033	4523038	reverse	4
4	ECK120000073	aroE	tsaC	yrdD-tsaC-aroE-yrdB	3428042	3428860	3428865	reverse	4
4	ECK120004244	tsaC	yrdD	yrdD-tsaC-aroE-yrdB	3428865	3429437	3429442	reverse	4
3	ECK120004232	aaeB	aaeA	aaeXAB	3384243	3386210	3386216	reverse	5
6	ECK120002330	caiE	caiD	caiTABCDE	34781	35371	35377	reverse	5
2	ECK120003125	efeO	efeB	efeOB	1081466	1082593	1082599	forward	5
9	ECK120000442	hisG	hisD	hisLGDCBHAFI	2088216	2089115	2089121	forward	5
6	ECK120001985	nikE	nikR	nikABCDER	3615799	3616605	3616611	forward	5
4	ECK120000956	trmH	recG	rpoZ-spoT-trmH-recG	3822538	3823227	3823233	forward	5
2	ECK120000967	sspB	sspA	sspAB	3374301	3374798	3374804	reverse	5
4	ECK120001147	ygiB	ygiC	tolC-ygiABC	3177862	3178437	3178443	forward	5
5	ECK120003692	wzb	wza	wza-wzb-wzc-wcaAB	2133679	2134122	2134128	reverse	5
5	ECK120000821	recJ	dsbC	xerD-dsbC-recJ-prfB-lysS	3034395	3036128	3036134	reverse	5
2	ECK120003026	ybiW	ybiY	ybiYW	859397	861829	861835	reverse	5
4	ECK120016298	ymjC	ymjD	ycjY-ymjDC-mpaA	1388704	1388886	1388892	reverse	5
2	ECK120002171	yiaV	yiaW	yiaWV	3750986	3752122	3752128	reverse	5
4	ECK120001574	artQ	artI	artPIQM	900757	901473	901480	reverse	6
4	ECK120002139	bcsZ	bcsB	bcsABZC	3687178	3688284	3688291	reverse	6
2	ECK120000266	exbD	exbB	exbBD	3148840	3149265	3149272	reverse	6
4	ECK120003232	lapA	lapB	lapAB-pyrF-yciH	1338267	1338575	1338582	forward	6
2	ECK120000991	thyA	lgt	lgt-thyA	2962383	2963177	2963184	reverse	6
6	ECK120000044	apaH	apaG	lptD-surA-pdxA-rsmA-apaGH	50380	51222	51229	reverse	6
15	ECK120001975	napG	napA	napFDAGHBC-ccmABCDEFGH	2297587	2298282	2298289	reverse	6
13	ECK120001998	nuoN	nuoM	nuoABCEFGHIJKLMN	2388070	2389527	2389534	reverse	6
4	ECK120001930	yehY	osmF	osmF-yehYXW	2215422	2216579	2216586	reverse	6
4	ECK120000955	spoT	trmH	rpoZ-spoT-trmH-recG	3820423	3822531	3822538	forward	6
4	ECK120000896	rpsF	priB	rpsF-priB-rpsR-rplI	4423141	4423536	4423543	forward	6
5	ECK120002478	glyT	thrT	thrU-tyrU-glyT-thrT-tufB	4173696	4173770	4173777	forward	6
6	ECK120003278	ydaU	ydaV	ydaSTUVW-rzpR	1419143	1420000	1420007	forward	6
11	ECK120004213	lptA	lptB	yrbG-kdsDC-lptCAB-rpoN-hpf-ptsN-rapZ-npr	3341402	3341959	3341966	forward	6
3	ECK120004233	aaeA	aaeX	aaeXAB	3386216	3387148	3387156	reverse	7
5	ECK120000445	hisP	hisM	argT-hisJQMP	2421758	2422531	2422539	reverse	7
6	ECK120000139	chbR	chbA	chbBCARFG	1816629	1817471	1817479	reverse	7
6	ECK120003084	ycbU	ycbV	elfDCG-ycbUVF	1002112	1002654	1002662	forward	7
7	ECK120001901	fliQ	fliR	fliLMNOPQR	2020640	2020909	2020917	forward	7
2	ECK120001906	glf	rfbX	glf-wbbH	2105250	2106353	2106361	reverse	7
12	ECK120004251	gspG	gspH	gspCDEFGHIJKLMO	3459045	3459482	3459490	forward	7
5	ECK120002387	mlaE	mlaF	mlaFEDCB	3336488	3337270	3337278	reverse	7
11	ECK120003306	paaD	paaE	paaABCDEFGHIJK	1453949	1454446	1454454	forward	7
2	ECK120003033	pdeI	dgcI	pdeI-dgcI	872202	874550	874558	forward	7
2	ECK120000730	pldB	yigL	pldB-yigL	4007193	4008215	4008223	forward	7
2	ECK120002117	rsmJ	prlC	prlC-rsmJ	3640403	3641155	3641163	reverse	7
6	ECK120000808	rbsD	rbsA	rbsDACBKR	3931374	3931793	3931801	forward	7
12	ECK120000757	secY	rplO	rplNXE-rpsNH-rplFR-rpsE-rpmD-rplO-secY-rpmJ	3440788	3442119	3442127	reverse	7
7	ECK120003120	rutD	rutC	rutABCDEFG	1070188	1070988	1070996	reverse	7
4	ECK120002061	mukF	mukE	smtA-mukFEB	973542	974864	974872	forward	7
2	ECK120000513	waaA	coaD	waaA-coaD	3806563	3807840	3807848	forward	7
3	ECK120003299	ynbE	ydbL	ydbH-ynbE-ydbL	1443711	1443896	1443904	forward	7
5	ECK120004090	yggU	rdgB	yggSTU-rdgB-yggW	3094405	3094695	3094703	forward	7
4	ECK120002393	yhdY	yhdZ	yhdWXYZ	3419347	3420450	3420458	forward	7
4	ECK120004257	tusB	tusC	yheO-tusDCB	3472700	3472987	3472995	reverse	7
2	ECK120001769	yihL	yihM	yihLM	4058470	4059180	4059188	forward	7
2	ECK120000082	ascF	ascB	ascFB	2837546	2839003	2839012	forward	8
9	ECK120000095	atpB	atpI	atpIBEFHAGDC	3919259	3920074	3920083	reverse	8
4	ECK120000508	kdpC	kdpB	kdpFABC	723630	724202	724211	reverse	8
4	ECK120000629	nagC	nagA	nagBAC-umpH	699597	700817	700826	reverse	8
11	ECK120003304	paaB	paaC	paaABCDEFGHIJK	1452892	1453179	1453188	forward	8
4	ECK120003128	pgaB	pgaA	pgaABCD	1087062	1089080	1089089	reverse	8
5	ECK120000769	pspC	pspD	pspABCDE	1367049	1367408	1367417	forward	8
2	ECK120004476	ruvB	ruvA	ruvAB	1942370	1943380	1943389	reverse	8
6	ECK120003498	sufB	sufA	sufABCDSE	1760546	1762033	1762042	reverse	8
5	ECK120002544	thrU	tyrU	thrU-tyrU-glyT-thrT-tufB	4173411	4173486	4173495	forward	8
8	ECK120016284	ykfH	ykfG	yafY-ykfBF-yafX-ykfGH-yafW-ykfI	263250	263471	263480	reverse	8
5	ECK120003946	yfjX	yfjY	yfjXY-ypjJ-yfjZ-ypjF	2773941	2774399	2774408	forward	8
5	ECK120003947	yfjY	ypjJ	yfjXY-ypjJ-yfjZ-ypjF	2774408	2774890	2774899	forward	8
2	ECK120004202	yhbU	yhbV	yhbUV	3299507	3300502	3300511	forward	8
2	ECK120016296	ymgH	ycgI	ymgH-ycgI	1222688	1222909	1222918	forward	8
2	ECK120001562	basS	basR	basRS	4330204	4331295	4331305	reverse	9
3	ECK120002191	yacG	zapD	coaE-zapD-yacG	111649	111846	111856	reverse	9
2	ECK120001373	dadA	dadX	dadAX	1236794	1238092	1238102	forward	9
4	ECK120002737	yafO	yafP	dinB-yafNOP	252301	252699	252709	forward	9
5	ECK120002338	dppC	dppB	dppABCDF	3701882	3702784	3702794	reverse	9
5	ECK120000255	entC	entE	entCEBAH	624108	625283	625293	forward	9
5	ECK120003845	eutL	eutC	eutBCLKR	2553763	2554422	2554432	reverse	9
2	ECK120000272	fadA	fadB	fadBA	4025632	4026795	4026805	reverse	9
5	ECK120002895	fdrA	ylbE_1	fdrA-ylbE_1E_2F-ybcF	545904	547571	547581	forward	9
7	ECK120000305	fimD	fimF	fimAICDFGH	4543119	4545755	4545765	forward	9
7	ECK120001900	fliP	fliQ	fliLMNOPQR	2019893	2020630	2020640	forward	9
4	ECK120000359	galT	galE	galETKM	789206	790252	790262	reverse	9
6	ECK120002274	gatA	gatZ	gatYZABCD	2172619	2173071	2173081	reverse	9
2	ECK120000403	glyS	glyQ	glyQS	3720351	3722420	3722430	reverse	9
12	ECK120004248	gspD	gspE	gspCDEFGHIJKLMO	3454399	3456351	3456361	forward	9
12	ECK120004250	gspF	gspG	gspCDEFGHIJKLMO	3457839	3459035	3459045	forward	9
5	ECK120003905	hcaB	hcaD	hcaEFCBD	2669247	2670059	2670069	forward	9
2	ECK120001811	hslU	hslV	hslVU	4118439	4119770	4119780	reverse	9
9	ECK120000472	hycF	hycE	hycABCDEFGHI	2842232	2842774	2842784	reverse	9
12	ECK120003876	hyfG	hyfH	hyfABCDEFGHIJR-focB	2606509	2608176	2608186	forward	9
6	ECK120001042	uhpC	uhpB	ivbL-ilvBN-uhpABC	3845328	3846647	3846657	reverse	9
2	ECK120000982	tdh	kbl	kbl-tdh	3788343	3789368	3789378	reverse	9
3	ECK120016318	yheV	kefB	kefGB-yheV	3476614	3476814	3476824	reverse	9
2	ECK120000554	malQ	malP	malPQ	3546008	3548092	3548102	reverse	9
2	ECK120000556	malX	malY	malXY	1697379	1698971	1698981	forward	9
7	ECK120002494	leuW	metT	metT-leuW-glnUW-metU-glnVX	696186	696270	696280	reverse	9
6	ECK120004471	mhpC	mhpD	mhpABCDFE	370463	371329	371339	forward	9
2	ECK120004459	molR_3	yehI	molR_3-yehI	2197344	2198291	2198301	forward	9
15	ECK120001972	napC	napB	napFDAGHBC-ccmABCDEFGH	2295679	2296281	2296291	reverse	9
4	ECK120002450	nrdE	nrdF	nrdHIEF	2799370	2801514	2801524	forward	9
3	ECK120001497	hemE	nfi	nudC-hemE-nfi	4195739	4196803	4196813	forward	9
4	ECK120002774	paoD	paoC	paoABCD	296994	297950	297960	reverse	9
4	ECK120001578	potG	potH	potFGHI	894214	895347	895357	forward	9
3	ECK120002011	hofB	ppdD	ppdD-hofBC	115714	117099	117109	reverse	9
4	ECK120000829	rfaD	waaF	rfaD-waaFCL	3792010	3792942	3792952	forward	9
4	ECK120001170	waaC	waaL	rfaD-waaFCL	3794002	3794961	3794971	forward	9
2	ECK120003176	nudJ	rluE	rluE-nudJ	1193050	1193511	1193521	reverse	9
12	ECK120000870	rplR	rplF	rplNXE-rpsNH-rplFR-rpsE-rpmD-rplO-secY-rpmJ	3443266	3443619	3443629	reverse	9
7	ECK120003119	rutE	rutD	rutABCDEFG	1069588	1070178	1070188	reverse	9
6	ECK120003497	sufC	sufB	sufABCDSE	1759790	1760536	1760546	reverse	9
3	ECK120000677	pal	cpoB	tolB-pal-cpoB	778290	778811	778821	forward	9
6	ECK120002309	ulaB	ulaC	ulaABCDEF	4419416	4419721	4419731	forward	9
6	ECK120004353	ulaD	ulaE	ulaABCDEF	4420209	4420859	4420869	forward	9
5	ECK120000545	lysS	prfB	xerD-dsbC-recJ-prfB-lysS	3031679	3033196	3033206	reverse	9
2	ECK120002806	yahI	yahJ	yahIJ	339389	340339	340349	forward	9
2	ECK120002909	ybcL	ybcM	ybcLM	570116	570667	570677	forward	9
11	ECK120003247	ycjR	ycjS	ycjMNOPQRSTUV-ymjB	1374058	1374846	1374856	forward	9
6	ECK120003546	ydjG	ydjH	ydjLKJIHG	1853015	1853995	1854005	reverse	9
7	ECK120003536	ynjA	ynjB	ydjXYZ-ynjABCD	1833539	1834087	1834097	forward	9
2	ECK120003627	yedN_2	yedN_1	yedN_1N_2	2009372	2009563	2009573	reverse	9
2	ECK120003638	yedS_1	yedS_2	yedS_1S_2	2032075	2032560	2032570	forward	9
2	ECK120003964	ygaV	ygaP	ygaVP	2795233	2795532	2795542	forward	9
4	ECK120002392	yhdX	yhdY	yhdWXYZ	3418156	3419337	3419347	forward	9
2	ECK120001628	yicI	yicJ	yicJI	3830242	3832560	3832570	reverse	9
9	ECK120001332	amiB	mutL	yjeF-tsaE-amiB-mutL-miaA-hfq-hflXKC	4394088	4395425	4395435	forward	9
4	ECK120004345	yjfL	yjfM	yjfKLMC	4410002	4410400	4410410	forward	9
2	ECK120004426	yjiL	yjiM	yjiML	4561945	4562712	4562722	reverse	9
10	ECK120003187	ymfM	ymfN	ymfTLMNROPQ-ycfK-ymfS	1203045	1203383	1203393	forward	9
2	ECK120003206	ymgD	ymgG	ymgGD	1221528	1221857	1221867	reverse	9
4	ECK120000661	ogt	abgT	abgABT-ogt	1397745	1398260	1398271	reverse	10
2	ECK120000269	accB	accC	accBC	3403458	3403928	3403939	forward	10
3	ECK120002892	allE	allC	allDCE	542485	543270	543281	reverse	10
2	ECK120000041	ansA	pncA	ansA-pncA	1848884	1849900	1849911	forward	10
3	ECK120000048	araA	araB	araBAD	66835	68337	68348	reverse	10
3	ECK120000061	argC	argB	argCBH	4153024	4154028	4154039	forward	10
2	ECK120001028	tyrA	aroF	aroF-tyrA	2736970	2738091	2738102	reverse	10
2	ECK120003514	arpB_1	arpB_2	arpB_1B_2	1801118	1801591	1801602	forward	10
4	ECK120002140	bcsB	bcsA	bcsABZC	3688291	3690630	3690641	reverse	10
6	ECK120002948	citF	citE	citCDEFXG	647262	648794	648805	reverse	10
3	ECK120002261	dhaM	dhaL	dhaKLM	1246919	1248337	1248348	reverse	10
3	ECK120003221	dhaL	dhaK	dhaKLM	1248348	1248980	1248991	reverse	10
3	ECK120000226	dmsA	dmsB	dmsABC	940182	942626	942637	forward	10
5	ECK120002339	dppD	dppC	dppABCDF	3700888	3701871	3701882	reverse	10
4	ECK120003858	eutJ	eutE	eutNEJG	2567523	2568359	2568370	reverse	10
5	ECK120002896	ylbE_2	ylbF	fdrA-ylbE_1E_2F-ybcF	547838	548839	548850	forward	10
4	ECK120000327	frdD	frdC	frdABCD	4377030	4377389	4377400	reverse	10
4	ECK120000326	frdC	frdB	frdABCD	4377400	4377795	4377806	reverse	10
4	ECK120001794	frvB	frvA	frvABXR	4088938	4090389	4090400	reverse	10
6	ECK120002572	glcF	glcE	glcDEFGBA	3122258	3123481	3123492	reverse	10
6	ECK120003162	thiK	nagZ	hinT-ycfL-lpoB-thiK-nagZ-ycfP	1162483	1163307	1163318	forward	10
12	ECK120001255	hyfB	hyfC	hyfABCDEFGHIJR-focB	2599840	2601858	2601869	forward	10
4	ECK120004182	agaV	agaW	kbaZ-agaVWA	3278239	3278712	3278723	forward	10
5	ECK120001527	leuD	leuC	leuLABCD	78848	79453	79464	reverse	10
2	ECK120003065	lolA	rarA	lolA-rarA	936592	937206	937217	forward	10
5	ECK120001456	holB	ycfH	pabC-yceG-tmk-holB-ycfH	1154985	1155989	1156000	forward	10
2	ECK120000736	pntB	pntA	pntAB	1672996	1674384	1674395	reverse	10
3	ECK120003054	ybjT	ltaE	poxB-ltaE-ybjT	906075	907505	907516	reverse	10
3	ECK120001833	gldA	fsaB	ptsA-fsaB-gldA	4135955	4137058	4137069	reverse	10
5	ECK120001884	alsE	alsC	rpiR-alsBACE	4305806	4306501	4306512	reverse	10
12	ECK120000875	rplX	rplN	rplNXE-rpsNH-rplFR-rpsE-rpmD-rplO-secY-rpmJ	3445475	3445789	3445800	reverse	10
11	ECK120000858	rplD	rplC	rpsJ-rplCDWB-rpsS-rplV-rpsC-rplP-rpmC-rpsQ	3449703	3450308	3450319	reverse	10
5	ECK120000845	rlpA	mrdB	rsfS-rlmH-mrdAB-rlpA	663325	664413	664424	reverse	10
7	ECK120003118	rutF	rutE	rutABCDEFG	1069083	1069577	1069588	reverse	10
4	ECK120001409	argK	scpB	scpA-argK-scpBC	3061009	3062004	3062015	forward	10
2	ECK120002901	sfmH	sfmF	sfmHF	561565	562542	562553	forward	10
7	ECK120000958	srlE	srlB	srlAEBD-gutM-srlR-gutQ	2824414	2825373	2825384	forward	10
5	ECK120003076	ssuC	ssuD	ssuEADCB	993264	994055	994066	reverse	10
6	ECK120000147	cheZ	cheY	tar-tap-cheRBYZ	1964417	1965061	1965072	reverse	10
4	ECK120000927	secD	secF	tgt-yajC-secDF	426871	428718	428729	forward	10
12	ECK120003686	wcaE	wcaD	wcaCDEF-gmd-fcl-gmm-wcaI-cpsBG-wcaJ-wzxC	2126928	2127674	2127685	reverse	10
3	ECK120003680	wcaM	wcaL	wcaKLM	2112526	2113920	2113931	reverse	10
3	ECK120004048	xdhA	xdhB	xdhABC	2998367	3000625	3000636	forward	10
5	ECK120003009	ybhR	ybhS	ybiH-ybhGFSR	824225	825331	825342	reverse	10
2	ECK120016300	ydaF	ydaG	ydaGF	1417180	1417335	1417346	reverse	10
4	ECK120001919	yehL	yehM	yehLMPQ	2202618	2203706	2203717	forward	10
2	ECK120003762	yfbT	yfbU	yfbUT	2409461	2410111	2410122	reverse	10
2	ECK120003852	yffQ	yffR	yffQR	2561599	2561991	2562002	forward	10
2	ECK120001894	zntR	yhdN	yhdN-zntR	3436727	3437152	3437163	reverse	10
6	ECK120004273	yhfU	php	yhfXW-php-yhfUTS	3505370	3505723	3505734	reverse	10
3	ECK120004405	yjhG	yjhH	yjhIHG	4520150	4522117	4522128	reverse	10
2	ECK120000018	yjiA	yjiX	yjiXA	4585932	4586888	4586899	reverse	10
3	ECK120002795	ykgE	ykgF	ykgEFG	320832	321551	321562	forward	10
5	ECK120003435	ynfF	ynfG	ynfEFGH-dmsD	1658580	1661003	1661014	forward	10
3	ECK120004189	yraJ	yraK	yraIJK	3286836	3289352	3289363	forward	10
3	ECK120004285	yrfG	hslR	yrfG-hslRO	3526691	3527359	3527370	forward	10
2	ECK120000260	acrE	acrF	acrEF	3411886	3413043	3413055	forward	11
4	ECK120001348	appC	appB	appCBXA	1036963	1038507	1038519	forward	11
3	ECK120000055	araH	araG	araFGH	1980578	1981567	1981579	reverse	11
3	ECK120002050	cobT	cobS	cobUST	2061412	2062491	2062503	reverse	11
4	ECK120002930	cusB	cusA	cusCFBA	596702	597925	597937	forward	11
5	ECK120000177	cyoE	cyoD	cyoABCDE	446039	446929	446941	reverse	11
6	ECK120003083	elfG	ycbU	elfDCG-ycbUVF	1001030	1002100	1002112	forward	11
4	ECK120003859	eutE	eutN	eutNEJG	2568370	2569773	2569785	reverse	11
9	ECK120002680	flgC	flgD	flgBCDEFGHIJ	1130661	1131065	1131077	forward	11
9	ECK120002686	flgH	flgI	flgBCDEFGHIJ	1134787	1135485	1135497	forward	11
2	ECK120001893	flgK	flgL	flgKL	1137601	1139244	1139256	forward	11
3	ECK120000378	glnG	glnL	glnALG	4051892	4053301	4053313	reverse	11
5	ECK120002349	gltJ	sroC	gltI-sroC-gltJKL	685152	685892	685904	reverse	11
2	ECK120003056	hcr	hcp	hcp-hcr	910405	911373	911385	reverse	11
2	ECK120002331	rluA	hepA	hepA-rluA	59687	60346	60358	reverse	11
4	ECK120002188	iscX	fdx	hscBA-fdx-iscX	2654558	2654758	2654770	reverse	11
12	ECK120003873	hyfD	hyfE	hyfABCDEFGHIJR-focB	2602833	2604272	2604284	forward	11
5	ECK120002215	afuC	afuB	insAB-2A-2B-2-afuBC	276980	278026	278038	reverse	11
7	ECK120003391	lsrD	lsrB	lsrACDBFG-tam	1602071	1603063	1603075	forward	11
13	ECK120001995	nuoJ	nuoI	nuoABCEFGHIJKLMN	2393364	2393918	2393930	reverse	11
5	ECK120000669	oppC	oppD	oppABCDF	1301858	1302766	1302778	forward	11
11	ECK120003303	paaA	paaB	paaABCDEFGHIJK	1451951	1452880	1452892	forward	11
2	ECK120001684	panC	panB	panBC	147944	148795	148807	reverse	11
4	ECK120001010	trkH	hemG	pepQ-yigZ-trkH-hemG	4031168	4032619	4032631	forward	11
2	ECK120000759	proB	proA	proBA	259612	260715	260727	forward	11
3	ECK120001834	fsaB	ptsA	ptsA-fsaB-gldA	4137069	4137731	4137743	reverse	11
2	ECK120000783	purD	purH	purHD	4202665	4203954	4203966	reverse	11
3	ECK120002791	rclC	rclB	rclABC	316950	317543	317555	reverse	11
12	ECK120000831	rfe	wzzE	rfe-wzzE-wecBC-rffGHCA-wzxE-rffT-wzyE-rffM	3965939	3967042	3967054	forward	11
2	ECK120003088	rlmL	uup	rlmL-uup	1007067	1009175	1009187	forward	11
5	ECK120000685	pdxJ	recO	rnc-era-recO-pdxJ-acpS	2699020	2699751	2699763	reverse	11
5	ECK120000823	recO	era	rnc-era-recO-pdxJ-acpS	2699763	2700491	2700503	reverse	11
2	ECK120003427	rspB	rspA	rspAB	1650920	1651939	1651951	reverse	11
7	ECK120003121	rutC	rutB	rutABCDEFG	1070996	1071382	1071394	reverse	11
7	ECK120004409	sgcE	sgcA	sgcXBCQAER	4524928	4525560	4525572	reverse	11
7	ECK120002321	sgcC	sgcB	sgcXBCQAER	4526953	4528266	4528278	reverse	11
6	ECK120001014	trpB	trpC	trpLEDCBA	1315246	1316439	1316451	reverse	11
4	ECK120002201	yadL	yadM	yadMLKC	151626	152231	152243	reverse	11
2	ECK120002762	yagG	yagH	yagGH	284619	286001	286013	forward	11
3	ECK120003505	ydiN	ydiB	ydiNB-aroD	1770536	1771801	1771813	forward	11
3	ECK120000678	panF	prmA	yhdT-panF-prmA	3405629	3407080	3407092	forward	11
6	ECK120004271	yhfS	yhfT	yhfXW-php-yhfUTS	3502957	3504042	3504054	reverse	11
6	ECK120004272	yhfT	yhfU	yhfXW-php-yhfUTS	3504054	3505358	3505370	reverse	11
9	ECK120002160	yiaK	yiaL	yiaKLMNO-lyxK-sgbHUE	3740756	3741754	3741766	forward	11
2	ECK120004325	yjdI	yjdJ	yjdIJ	4349866	4350096	4350108	forward	11
2	ECK120002318	yjhB	yjhC	yjhBC	4502081	4503298	4503310	forward	11
2	ECK120004412	yjhQ	yjhX	yjhXQ	4531262	4531807	4531819	reverse	11
10	ECK120003188	ymfN	ymfR	ymfTLMNROPQ-ycfK-ymfS	1203393	1204760	1204772	forward	11
2	ECK120003908	yphB	yphC	yphCB	2671838	2672710	2672722	reverse	11
6	ECK120004184	agaS	kbaY	agaS-kbaY-agaBCDI	3279998	3281152	3281165	forward	12
4	ECK120001347	appB	appX	appCBXA	1038519	1039655	1039668	forward	12
3	ECK120002120	arsB	arsC	arsRBC	3646958	3648247	3648260	forward	12
9	ECK120000094	atpA	atpH	atpIBEFHAGDC	3916339	3917880	3917893	reverse	12
7	ECK120003993	casC	casB	casABCDE12	2879073	2880164	2880177	reverse	12
6	ECK120002087	chbG	chbF	chbBCARFG	1814410	1815159	1815172	reverse	12
4	ECK120001196	creA	creB	creABCD	4633544	4634017	4634030	forward	12
5	ECK120003844	eutK	eutL	eutBCLKR	2553250	2553750	2553763	reverse	12
6	ECK120003865	eutP	eutS	eutSPQTDM	2573000	2573479	2573492	reverse	12
3	ECK120001205	fdnG	fdnH	fdnGHI	1545425	1548472	1548485	forward	12
4	ECK120001788	fdoH	fdoG	fdoGHI-fdhE	4079880	4080782	4080795	reverse	12
7	ECK120000307	fimF	fimG	fimAICDFGH	4545765	4546295	4546308	forward	12
7	ECK120001534	gcl	hyi	gcl-hyi-glxR-ybbW-allB-ybbY-glxK	533140	534921	534934	forward	12
3	ECK120000396	gltB	gltD	gltBDF	3352654	3357207	3357220	forward	12
3	ECK120002496	leuZ	cysT	glyW-cysT-leuZ	1989839	1989925	1989938	reverse	12
8	ECK120001739	hybG	hybF	hybOABCDEFG	3137738	3137986	3137999	reverse	12
3	ECK120000561	manY	manZ	manXYZ	1901106	1901906	1901919	forward	12
15	ECK120001971	ccmA	napC	napFDAGHBC-ccmABCDEFGH	2295043	2295666	2295679	reverse	12
5	ECK120000816	recC	ppdC	ppdAB-ygdB-ppdC-recC	2957082	2960450	2960463	reverse	12
3	ECK120000802	pyrI	pyrB	pyrLBI	4469009	4469470	4469483	reverse	12
12	ECK120000860	rplF	rpsH	rplNXE-rpsNH-rplFR-rpsE-rpmD-rplO-secY-rpmJ	3443629	3444162	3444175	reverse	12
2	ECK120002077	ptsP	rppH	rppH-ptsP	2964210	2966456	2966469	reverse	12
11	ECK120000868	rplP	rpsC	rpsJ-rplCDWB-rpsS-rplV-rpsC-rplP-rpmC-rpsQ	3446781	3447191	3447204	reverse	12
7	ECK120002545	thrV	rrfD	rrsD-ileU-alaU-rrlD-rrfD-thrV-rrfF	3421602	3421677	3421690	reverse	12
2	ECK120002234	rsmE	gshB	rsmE-gshB	3089156	3089887	3089900	forward	12
2	ECK120000917	sbmA	yaiW	sbmA-yaiW	395863	397083	397096	forward	12
7	ECK120004410	sgcQ	sgcC	sgcXBCQAER	4526134	4526940	4526953	reverse	12
6	ECK120003494	sufE	sufS	sufABCDSE	1756898	1757314	1757327	reverse	12
4	ECK120002831	tauA	tauB	tauABCD	384456	385418	385431	forward	12
2	ECK120001337	ubiC	ubiA	ubiCA	4250529	4251026	4251039	forward	12
8	ECK120001288	fabD	fabG	yceD-rpmF-plsX-fabHDG-acpP-fabF	1148951	1149880	1149893	forward	12
6	ECK120003277	ydaT	ydaU	ydaSTUVW-rzpR	1418708	1419130	1419143	forward	12
3	ECK120003382	ydeR	ydeS	ydeTSR	1585817	1586320	1586333	reverse	12
6	ECK120003488	ydhX	ydhW	ydhYVWXUT	1748369	1749088	1749101	reverse	12
2	ECK120002199	yfaD	ypaA	yfaD-ypaA	2354926	2355825	2355838	forward	12
7	ECK120003783	yfcT	yfcU	yfcUTSRQPO	2450378	2451274	2451287	reverse	12
9	ECK120002163	yiaN	yiaO	yiaKLMNO-lyxK-sgbHUE	3742827	3744104	3744117	forward	12
3	ECK120004420	iadA	yjiG	yjiHG-iadA	4556377	4557549	4557562	reverse	12
3	ECK120003599	yebY	yebZ	yobA-yebZY	1921389	1921730	1921743	reverse	12
2	ECK120002092	cspC	yobF	yobF-cspC	1905250	1905459	1905472	reverse	12
3	ECK120003819	ypdB	ypdC	ypdABC	2498405	2499139	2499152	forward	12
2	ECK120003941	yfjU	ypjM_3	ypjM_3-yfjU	2769862	2770176	2770189	reverse	12
3	ECK120000105	betA	betB	betIBA	324801	326471	326485	reverse	13
3	ECK120000106	betB	betI	betIBA	326485	327957	327971	reverse	13
5	ECK120001300	gabD	gabT	csiD-lhgO-gabDTP	2789295	2790743	2790757	forward	13
6	ECK120003370	ddpA	ddpX	ddpXABCDF	1558955	1560505	1560519	reverse	13
5	ECK120000257	entE	entB	entCEBAH	625293	626903	626917	forward	13
6	ECK120003160	ycfL	lpoB	hinT-ycfL-lpoB-thiK-nagZ-ycfP	1161470	1161847	1161861	forward	13
4	ECK120000741	potB	potA	potABCD	1182840	1183667	1183681	reverse	13
2	ECK120002390	ybaM	priC	priC-ybaM	489334	489495	489509	reverse	13
7	ECK120004177	tdcF	tdcE	tdcABCDEFG	3257743	3258132	3258146	reverse	13
7	ECK120001154	tdcD	tdcC	tdcABCDEFG	3260474	3261694	3261708	reverse	13
3	ECK120001435	ubiE	ubiJ	ubiEJB	4016878	4017633	4017647	forward	13
6	ECK120002310	ulaC	ulaD	ulaABCDEF	4419731	4420195	4420209	forward	13
10	ECK120001320	waaB	waaS	waaQGPSBOJYZU	3801081	3802190	3802204	reverse	13
3	ECK120002223	arfB	nlpE	yaeQ-arfB-nlpE	214833	215255	215269	forward	13
11	ECK120003242	ycjM	ycjN	ycjMNOPQRSTUV-ymjB	1368240	1369919	1369933	forward	13
11	ECK120003250	ycjU	ycjV	ycjMNOPQRSTUV-ymjB	1378172	1378831	1378845	forward	13
3	ECK120003383	ydeS	ydeT	ydeTSR	1586333	1586863	1586877	reverse	13
2	ECK120003419	ydfT	ydfU	ydfUT	1640513	1641265	1641279	reverse	13
2	ECK120002287	ydiF	ydiO	ydiFO	1773611	1775206	1775220	forward	13
2	ECK120003611	cutC	yecM	yecM-cutC	1956544	1957290	1957304	reverse	13
2	ECK120001824	yeeD	yeeE	yeeED	2082250	2082477	2082491	reverse	13
2	ECK120001426	yigF	yigG	yigGF	4000442	4000822	4000836	reverse	13
4	ECK120003322	ynbC	ynbD	ynbABCD	1477162	1478919	1478933	forward	13
11	ECK120002389	yrbG	kdsD	yrbG-kdsDC-lptCAB-rpoN-hpf-ptsN-rapZ-npr	3338297	3339274	3339288	forward	13
4	ECK120002313	ytfR	ytfT	ytfQRT-yjfF	4449081	4450583	4450597	forward	13
9	ECK120000101	atpH	atpF	atpIBEFHAGDC	3917893	3918426	3918441	reverse	14
3	ECK120001667	yieK	yieL	bglH-yieLK	3896694	3897416	3897431	reverse	14
6	ECK120002950	citD	citC	citCDEFXG	649710	650006	650021	reverse	14
6	ECK120004081	yggP	cmtA	cmtBA-yggPFDC	3074201	3075478	3075493	reverse	14
3	ECK120003623	tcyL	dcyD	dcyD-tcyLN	1995835	1996503	1996518	reverse	14
2	ECK120001404	def	fmt	def-fmt	3431712	3432221	3432236	forward	14
4	ECK120001515	fixA	fixB	fixABCX	42403	43173	43188	forward	14
2	ECK120001836	frwC	frwB	frwCB	4140553	4141632	4141647	forward	14
5	ECK120003823	ypdF	fryC	fryBC-ypdFE-fryA	2503569	2504654	2504669	reverse	14
12	ECK120004255	gspK	gspL	gspCDEFGHIJKLMO	3460946	3461929	3461944	forward	14
3	ECK120000841	rimI	yjjG	holD-rimI-yjjG	4606208	4606654	4606669	forward	14
5	ECK120000846	lptE	leuS	leuS-lptE-holA-nadD-cobC	670828	671409	671424	reverse	14
3	ECK120000549	malG	malF	malEFG	4240649	4241539	4241554	reverse	14
6	ECK120001336	menB	menH	menFDHBCE	2373984	2374841	2374856	reverse	14
13	ECK120001994	nuoI	nuoH	nuoABCEFGHIJKLMN	2393930	2394472	2394487	reverse	14
5	ECK120000668	oppB	oppC	oppABCDF	1300923	1301843	1301858	forward	14
11	ECK120003305	paaC	paaD	paaABCDEFGHIJK	1453188	1453934	1453949	forward	14
4	ECK120000021	aceE	aceF	pdhR-aceEF-lpd	123017	125680	125695	forward	14
5	ECK120000726	phoU	pstB	pstSCAB-phoU	3904876	3905601	3905616	reverse	14
12	ECK120000895	rpsE	rplR	rplNXE-rpsNH-rplFR-rpsE-rpmD-rplO-secY-rpmJ	3442748	3443251	3443266	reverse	14
12	ECK120000904	rpsN	rplE	rplNXE-rpsNH-rplFR-rpsE-rpmD-rplO-secY-rpmJ	3444601	3444906	3444921	reverse	14
12	ECK120000859	rplE	rplX	rplNXE-rpsNH-rplFR-rpsE-rpmD-rplO-secY-rpmJ	3444921	3445460	3445475	reverse	14
11	ECK120000873	rplV	rpsS	rpsJ-rplCDWB-rpsS-rplV-rpsC-rplP-rpmC-rpsQ	3447923	3448255	3448270	reverse	14
8	ECK120000968	sucA	sucB	sdhCDAB-sucABCD	757929	760730	760745	forward	14
2	ECK120002492	leuU	secG	secG-leuU	3320094	3320180	3320195	reverse	14
6	ECK120000146	cheY	cheB	tar-tap-cheRBYZ	1965072	1965461	1965476	reverse	14
8	ECK120000702	pheT	pheS	thrS-infC-rpmI-rplT-pheMST-ihfA	1793581	1795968	1795983	reverse	14
2	ECK120002375	uxaA	uxaC	uxaCA	3239849	3241336	3241351	reverse	14
3	ECK120004064	xanQ	guaD	xanQ-guaD-ghxQ	3022373	3023773	3023788	forward	14
2	ECK120002760	yagE	yagF	yagEF	281502	282410	282425	forward	14
3	ECK120002986	ybgP	ybgQ	ybgQPO	748202	748930	748945	reverse	14
7	ECK120003534	ydjY	ydjZ	ydjXYZ-ynjABCD	1832140	1832817	1832832	forward	14
3	ECK120003818	ypdA	ypdB	ypdABC	2496693	2498390	2498405	forward	14
2	ECK120003870	tmcA	ypfJ	ypfJ-tmcA	2591866	2593881	2593896	reverse	14
7	ECK120003990	cas1	casE	casABCDE12	2876877	2877794	2877810	reverse	15
4	ECK120002929	cusF	cusB	cusCFBA	596354	596686	596702	forward	15
2	ECK120000168	cydA	cydB	cydAB	770681	772249	772265	forward	15
5	ECK120001157	garK	garR	garPLRK-rnpB	3268647	3269873	3269889	reverse	15
5	ECK120000014	garL	garP	garPLRK-rnpB	3270809	3271579	3271595	reverse	15
6	ECK120004141	yqiG	yqiH	insC-5CD-5D-5-yqiGHI	3185422	3187887	3187903	forward	15
2	ECK120000523	lepB	lepA	lepAB	2702357	2703331	2703347	reverse	15
7	ECK120002501	metU	glnW	metT-leuW-glnUW-metU-glnVX	695887	695963	695979	reverse	15
3	ECK120000587	mglC	mglA	mglBAC	2234765	2235775	2235791	reverse	15
16	ECK120001074	ftsL	ftsI	mraZ-rsmH-ftsLI-murEF-mraY-murD-ftsW-murGC-ddlB-ftsQAZ-lpxC	91032	91397	91413	forward	15
2	ECK120003172	nagK	cobB	nagK-cobB	1177816	1178727	1178743	forward	15
13	ECK120001989	nuoB	nuoA	nuoABCEFGHIJKLMN	2401973	2402635	2402651	reverse	15
2	ECK120000899	rpsI	rplM	rplM-rpsI	3375837	3376229	3376245	reverse	15
8	ECK120000920	sdhA	sdhB	sdhCDAB-sucABCD	755130	756896	756912	forward	15
6	ECK120004352	ulaA	ulaB	ulaABCDEF	4418003	4419400	4419416	forward	15
12	ECK120003685	wcaF	wcaE	wcaCDEF-gmd-fcl-gmm-wcaI-cpsBG-wcaJ-wzxC	2126364	2126912	2126928	reverse	15
3	ECK120000951	speD	speE	yacC-speED	134788	135582	135598	reverse	15
8	ECK120002742	ykfG	yafX	yafY-ykfBF-yafX-ykfGH-yafW-ykfI	263480	263956	263972	reverse	15
8	ECK120000271	fabH	fabD	yceD-rpmF-plsX-fabHDG-acpP-fabF	1147982	1148935	1148951	forward	15
4	ECK120001912	yehA	yehB	yehDCBA	2185402	2186436	2186452	reverse	15
4	ECK120001913	yehB	yehC	yehDCBA	2186452	2188932	2188948	reverse	15
6	ECK120003731	yfaS_2	yfaS_1	yfaATS_1S_2QP	2327820	2328305	2328321	reverse	15
2	ECK120003888	yfgH	yfgI	yfgHI	2627814	2628332	2628348	forward	15
3	ECK120002419	dgcN	yfiB	yfiR-dgcN-yfiB	2740405	2741631	2741647	forward	15
2	ECK120004206	obgE	yhbE	yhbE-obgE	3328604	3329776	3329792	reverse	15
4	ECK120003321	ynbB	ynbC	ynbABCD	1476250	1477146	1477162	forward	15
2	ECK120000651	bamC	dapA	dapA-bamC	2595853	2596887	2596904	reverse	16
3	ECK120002006	feoA	feoB	feoABC	3538185	3538412	3538429	forward	16
2	ECK120001263	yeiB	folE	folE-yeiB	2239832	2240989	2241006	reverse	16
3	ECK120000330	fruA	fruK	fruBKA	2257741	2259432	2259449	reverse	16
3	ECK120000393	glpR	glpG	glpEGR	3557870	3558628	3558645	reverse	16
4	ECK120002032	hscA	hscB	hscBA-fdx-iscX	2655107	2656957	2656974	reverse	16
12	ECK120003872	hyfC	hyfD	hyfABCDEFGHIJR-focB	2601869	2602816	2602833	forward	16
4	ECK120002034	iscA	iscU	iscRSUA	2657585	2657908	2657925	reverse	16
3	ECK120001323	emrA	emrB	mprA-emrAB	2809449	2810621	2810638	forward	16
2	ECK120002250	rcsD	rcsB	rcsDB	2311510	2314182	2314199	forward	16
2	ECK120001763	rdoA	dsbA	rdoA-dsbA	4040438	4041424	4041441	forward	16
2	ECK120000883	rpmH	rnpA	rpmH-rnpA	3882359	3882499	3882516	forward	16
11	ECK120000909	rpsS	rplB	rpsJ-rplCDWB-rpsS-rplV-rpsC-rplP-rpmC-rpsQ	3448270	3448548	3448565	reverse	16
5	ECK120000901	rpsK	rpsM	rpsMKD-rpoA-rplQ	3439731	3440120	3440137	reverse	16
7	ECK120004408	sgcR	sgcE	sgcXBCQAER	4524129	4524911	4524928	reverse	16
6	ECK120003549	ydjJ	ydjK	ydjLKJIHG	1855814	1856857	1856874	reverse	16
3	ECK120003998	ygcO	ygcP	ygcNOP	2891941	2892201	2892218	forward	16
2	ECK120004152	ygjJ	ygjK	ygjJK	3225823	3226893	3226910	forward	16
2	ECK120004277	yhfY	yhfZ	yhfZY	3509082	3509444	3509461	reverse	16
3	ECK120001776	yihS	yihT	yihUTS	4068538	4069779	4069796	reverse	16
7	ECK120004466	rpe	dam	aroKB-damX-dam-rpe-gph-trpS	3512404	3513081	3513099	reverse	17
4	ECK120001573	artI	artP	artPIQM	901480	902211	902229	reverse	17
2	ECK120000130	carA	carB	carAB	29651	30799	30817	forward	17
2	ECK120000244	dsdX	dsdA	dsdXA	2475869	2477206	2477224	forward	17
5	ECK120000372	glgC	glgX	glgBXCAP	3566056	3567351	3567369	reverse	17
9	ECK120000471	hycE	hycD	hycABCDEFGHI	2842784	2844493	2844511	reverse	17
5	ECK120003030	gsiB	gsiC	iaaA-gsiABCD	868634	870172	870190	forward	17
6	ECK120004470	mhpB	mhpC	mhpABCDFE	369501	370445	370463	forward	17
2	ECK120002432	mngA	mngB	mngAB	765207	767183	767201	forward	17
11	ECK120000893	rpsC	rplV	rpsJ-rplCDWB-rpsS-rplV-rpsC-rplP-rpmC-rpsQ	3447204	3447905	3447923	reverse	17
11	ECK120000856	rplB	rplW	rpsJ-rplCDWB-rpsS-rplV-rpsC-rplP-rpmC-rpsQ	3448565	3449386	3449404	reverse	17
10	ECK120001389	waaY	waaJ	waaQGPSBOJYZU	3798290	3798988	3799006	reverse	17
5	ECK120003340	ydcS	ydcT	ydcSTUV-patD	1509678	1510823	1510841	forward	17
7	ECK120003537	ynjB	ynjC	ydjXYZ-ynjABCD	1834097	1835263	1835281	forward	17
4	ECK120003734	yfaU	yfaV	yfaXWVU	2356064	2356867	2356885	reverse	17
5	ECK120004088	yggS	yggT	yggSTU-rdgB-yggW	3093120	3093824	3093842	forward	17
4	ECK120004344	yjfK	yjfL	yjfKLMC	4409325	4409984	4410002	forward	17
3	ECK120004011	yqcA	truC	yqcC-truC-yqcA	2920557	2921006	2921024	reverse	17
3	ECK120000110	bglB	bglF	bglGFB	3900312	3901724	3901743	reverse	18
6	ECK120002692	fliI	fliJ	fliFGHIJK	2014578	2015951	2015970	forward	18
5	ECK120000373	glgP	glgA	glgBXCAP	3562157	3564604	3564623	reverse	18
6	ECK120000462	hyaB	hyaC	hyaABCDEF	1032477	1034270	1034289	forward	18
2	ECK120000526	lexA	dinF	lexA-dinF	4255138	4255746	4255765	forward	18
5	ECK120004209	mlaC	mlaD	mlaFEDCB	3335278	3335913	3335932	reverse	18
4	ECK120000647	nirC	cysG	nirBDC-cysG	3495025	3495831	3495850	forward	18
5	ECK120004342	yjfI	yjfJ	nsrR-rnr-rlmB-yjfIJ	4408156	4408557	4408576	forward	18
12	ECK120001416	rffG	rffH	rfe-wzzE-wecBC-rffGHCA-wzxE-rffT-wzyE-rffM	3970545	3971612	3971631	forward	18
4	ECK120000890	rpoZ	spoT	rpoZ-spoT-trmH-recG	3820129	3820404	3820423	forward	18
4	ECK120001136	rimM	rpsP	rpsP-rimM-trmD-rplS	2743392	2743940	2743959	reverse	18
6	ECK120000144	cheR	tap	tar-tap-cheRBYZ	1966528	1967388	1967407	reverse	18
8	ECK120002741	yafW	ykfH	yafY-ykfBF-yafX-ykfGH-yafW-ykfI	262914	263231	263250	reverse	18
2	ECK120003095	yccS	yccF	yccFS	1020953	1023106	1023125	reverse	18
11	ECK120003246	ycjQ	ycjR	ycjMNOPQRSTUV-ymjB	1372987	1374039	1374058	forward	18
3	ECK120003499	ydiH	menI	ydiJ-menI-ydiH	1762958	1763227	1763246	reverse	18
2	ECK120003957	ygaQ_1	ygaQ_2	ygaQ_1Q_2	2784419	2784751	2784770	forward	18
9	ECK120001693	tsaE	amiB	yjeF-tsaE-amiB-mutL-miaA-hfq-hflXKC	4393608	4394069	4394088	forward	18
5	ECK120003961	csiD	lhgO	csiD-lhgO-gabDTP	2787007	2787984	2788004	forward	19
7	ECK120000308	fimG	fimH	fimAICDFGH	4546308	4546811	4546831	forward	19
9	ECK120002683	flgE	flgF	flgBCDEFGHIJ	1131797	1133005	1133025	forward	19
3	ECK120001758	etk	etp	gfcE-etp-etk	1041253	1043433	1043453	reverse	19
5	ECK120002269	iaaA	gsiA	iaaA-gsiABCD	865791	866756	866776	forward	19
5	ECK120003029	gsiA	gsiB	iaaA-gsiABCD	866776	868614	868634	forward	19
8	ECK120000494	ilvM	ilvE	ilvLXG_1G_2MEDA	3950224	3950487	3950507	forward	19
4	ECK120004183	agaW	agaA	kbaZ-agaVWA	3278723	3279124	3279144	forward	19
3	ECK120001399	marR	marA	marRAB	1617144	1617578	1617598	forward	19
3	ECK120004415	nanM	nanC	nanCMS	4535682	4536788	4536808	reverse	19
6	ECK120001293	ribE	nusB	nrdR-ribDE-nusB-thiL-pgpA	433871	434341	434361	forward	19
2	ECK120000751	prc	proQ	proQ-prc	1910792	1912840	1912860	reverse	19
2	ECK120001731	talA	tktB	talA-tktB	2576688	2577638	2577658	forward	19
5	ECK120003508	ydiQ	ydiR	ydiQRST-fadK	1777641	1778405	1778425	forward	19
2	ECK120001959	yejL	yejM	yejLM	2282151	2282378	2282398	forward	19
7	ECK120003782	yfcS	yfcT	yfcUTSRQPO	2449606	2450358	2450378	reverse	19
4	ECK120002484	hisR	leuT	argX-hisR-leuT-proM	3980532	3980608	3980629	forward	20
9	ECK120000096	atpC	atpD	atpIBEFHAGDC	3913576	3913995	3914016	reverse	20
2	ECK120003883	bepA	yfgD	bepA-yfgD	2614116	2615579	2615600	forward	20
5	ECK120002566	eutC	eutB	eutBCLKR	2554432	2555319	2555340	reverse	20
2	ECK120003770	folX	yfcH	folX-yfcH	2419347	2419709	2419730	forward	20
5	ECK120002424	frlA	frlB	frlABCDR	3497932	3499269	3499290	forward	20
3	ECK120004008	gudD	gudX	gudPXD	2916067	2917407	2917428	reverse	20
4	ECK120000145	cheW	cheA	motAB-cheAW	1970860	1971363	1971384	reverse	20
15	ECK120000707	phnF	phnE_2	phnCDE_1E_2FGHIJKLMNOP	4319720	4320445	4320466	reverse	20
2	ECK120000837	rhsA	yibA	rhsA-yibA	3760206	3764339	3764360	forward	20
2	ECK120002561	rpmA	rplU	rplU-rpmA	3330884	3331141	3331162	reverse	20
7	ECK120003117	rutG	rutF	rutABCDEFG	1067734	1069062	1069083	reverse	20
3	ECK120001269	radA	nadR	serB-radA-nadR	4623935	4625317	4625338	forward	20
2	ECK120003151	yceO	solA	solA-yceO	1118530	1118670	1118691	reverse	20
2	ECK120002362	yccJ	wrbA	wrbA-yccJ	1066087	1066314	1066335	reverse	20
8	ECK120002740	ykfI	yafW	yafY-ykfBF-yafX-ykfGH-yafW-ykfI	262552	262893	262914	reverse	20
11	ECK120003243	ycjN	ycjO	ycjMNOPQRSTUV-ymjB	1369933	1371225	1371246	forward	20
6	ECK120003490	ydhV	ydhY	ydhYVWXUT	1749752	1751854	1751875	reverse	20
6	ECK120003548	ydjI	ydjJ	ydjLKJIHG	1854957	1855793	1855814	reverse	20
5	ECK120003948	yfjZ	ypjF	yfjXY-ypjJ-yfjZ-ypjF	2775137	2775454	2775475	forward	20
3	ECK120001470	yhcA	yhcD	yhcAD-ychE_1	3360134	3360808	3360829	forward	20
4	ECK120000882	rpmG	rpmB	yicR-rpmBG-mutM	3809273	3809440	3809461	reverse	20
11	ECK120004210	kdsD	kdsC	yrbG-kdsDC-lptCAB-rpoN-hpf-ptsN-rapZ-npr	3339288	3340274	3340295	forward	20
3	ECK120002893	allC	allD	allDCE	543281	544516	544538	reverse	21
6	ECK120001145	yggD	yggF	cmtBA-yggPFDC	3072708	3073217	3073239	reverse	21
5	ECK120000174	cyoB	cyoA	cyoABCDE	447874	449865	449887	reverse	21
5	ECK120003824	fryC	fryB	fryBC-ypdFE-fryA	2504669	2505916	2505938	reverse	21
7	ECK120002890	ybbY	glxK	gcl-hyi-glxR-ybbW-allB-ybbY-glxK	539789	541090	541112	forward	21
6	ECK120002441	glcB	glcG	glcDEFGBA	3119656	3121827	3121849	reverse	21
4	ECK120000426	hemX	hemD	hemCDXY	3985908	3987089	3987111	reverse	21
12	ECK120003880	hyfR	focB	hyfABCDEFGHIJR-focB	2609922	2611934	2611956	forward	21
5	ECK120001543	moaA	moaB	moaABCDE	816267	817256	817278	forward	21
2	ECK120004336	mscM	psd	psd-mscM	4384070	4387393	4387415	reverse	21
7	ECK120000980	tdcC	tdcB	tdcABCDEFG	3261708	3263039	3263061	reverse	21
5	ECK120003343	ydcV	patD	ydcSTUV-patD	1512786	1513580	1513602	forward	21
2	ECK120003651	yeeL_2	yeeL_1	yeeL_1L_2	2050300	2050626	2050648	reverse	21
2	ECK120001155	yhaB	yhaC	yhaBC	3265876	3266415	3266437	forward	21
2	ECK120001661	yieE	yieF	yieEF	3891892	3892653	3892675	forward	21
2	ECK120001647	acrB	acrA	acrAB	480478	483627	483650	reverse	22
5	ECK120002252	lhgO	gabD	csiD-lhgO-gabDTP	2788004	2789272	2789295	forward	22
3	ECK120003423	ydfW	ydfX	dicC-ydfXW	1645198	1645347	1645370	reverse	22
3	ECK120000391	glpK	glpF	glpFKX	4113737	4115245	4115268	reverse	22
6	ECK120003163	nagZ	ycfP	hinT-ycfL-lpoB-thiK-nagZ-ycfP	1163318	1164343	1164366	forward	22
4	ECK120004181	kbaZ	agaV	kbaZ-agaVWA	3276936	3278216	3278239	forward	22
4	ECK120000507	kdpB	kdpA	kdpFABC	724211	726259	726282	reverse	22
4	ECK120000985	tgt	yajC	tgt-yajC-secDF	425361	426488	426511	forward	22
8	ECK120002745	ykfB	yafY	yafY-ykfBF-yafX-ykfGH-yafW-ykfI	264844	265311	265334	reverse	22
3	ECK120016285	ykgN	yagB	yagAB-ykgN	279248	279586	279609	reverse	22
5	ECK120002979	ybgI	ybgJ	ybgIJKL-nei	742050	742793	742816	forward	22
6	ECK120003276	ydaS	ydaT	ydaSTUVW-rzpR	1418389	1418685	1418708	forward	22
6	ECK120003279	ydaV	ydaW	ydaSTUVW-rzpR	1420007	1420753	1420776	forward	22
4	ECK120001304	ubiI	ubiH	ygfB-pepP-ubiHI	3049137	3050339	3050362	reverse	22
2	ECK120001550	glnE	ygiF	ygiF-glnE	3194823	3197663	3197686	reverse	22
2	ECK120004173	yhaK	yhaL	yhaKL	3252341	3253042	3253065	forward	22
2	ECK120001671	hsrA	yieP	yieP-hsrA	3937208	3938635	3938658	reverse	22
3	ECK120003911	yphE	yphF	yphFED	2674872	2676383	2676406	reverse	22
11	ECK120000889	rpoN	hpf	yrbG-kdsDC-lptCAB-rpoN-hpf-ptsN-rapZ-npr	3342739	3344172	3344195	forward	22
3	ECK120000364	gcvH	gcvT	gcvTHP	3047182	3047571	3047595	reverse	23
4	ECK120004387	idnO	idnD	idnDOTR	4490610	4491374	4491398	reverse	23
5	ECK120002956	cobC	nadD	leuS-lptE-holA-nadD-cobC	668519	669130	669154	reverse	23
7	ECK120003393	lsrF	lsrG	lsrACDBFG-tam	1604124	1604999	1605023	forward	23
7	ECK120002470	glnU	leuW	metT-leuW-glnUW-metU-glnVX	696088	696162	696186	reverse	23
3	ECK120000590	minD	minC	minCDE	1223772	1224584	1224608	reverse	23
4	ECK120004078	scpB	scpC	scpA-argK-scpBC	3062015	3062800	3062824	forward	23
2	ECK120003136	ycdX	ycdY	ycdXY	1098102	1098839	1098863	forward	23
3	ECK120003361	yddK	yddL	yddLKJ	1542782	1543738	1543762	reverse	23
4	ECK120003939	yfjS	yfjT	yfjR-ypjK-yfjST	2768703	2769146	2769170	forward	23
3	ECK120001777	yihT	yihU	yihUTS	4069796	4070674	4070698	reverse	23
2	ECK120001858	yjbL	yjbM	yjbLM	4258344	4258598	4258622	forward	23
2	ECK120003602	yobB	exoX	yobB-exoX	1923464	1924120	1924144	forward	23
4	ECK120003140	csgF	csgE	csgDEFG	1100934	1101350	1101375	reverse	24
2	ECK120003372	dosP	dosC	dosCP	1561358	1563757	1563782	reverse	24
6	ECK120003081	elfD	elfC	elfDCG-ycbUVF	997713	998414	998439	forward	24
9	ECK120002682	flgD	flgE	flgBCDEFGHIJ	1131077	1131772	1131797	forward	24
3	ECK120000832	fliD	fliS	fliDST	2001896	2003302	2003327	forward	24
5	ECK120003821	fryA	ypdE	fryBC-ypdFE-fryA	2500012	2502507	2502532	reverse	24
3	ECK120002123	mdtE	mdtF	gadE-mdtEF	3657255	3658412	3658437	forward	24
4	ECK120001652	glvB	glvC	glvCBG-ysdC	3860010	3860495	3860520	reverse	24
2	ECK120016303	hicA	hicB	hicAB	1507310	1507486	1507511	forward	24
8	ECK120000498	infB	nusA	metY-rimP-nusA-infB-rbfA-truB-rpsO-pnp	3311364	3314036	3314061	reverse	24
5	ECK120004136	cpdA	yqiB	nudF-yqiB-cpdA-yqiA-parE	3174028	3174855	3174880	reverse	24
15	ECK120000706	phnD	phnC	phnCDE_1E_2FGHIJKLMNOP	4321359	4322375	4322400	reverse	24
6	ECK120000807	rbsC	rbsB	rbsDACBKR	3933311	3934276	3934301	forward	24
2	ECK120003609	torZ	torY	torYZ	1952602	1955031	1955056	reverse	24
5	ECK120001059	dsbC	xerD	xerD-dsbC-recJ-prfB-lysS	3036134	3036844	3036869	reverse	24
4	ECK120002848	dxs	ispA	xseB-ispA-dxs-yajO	437539	439401	439426	reverse	24
4	ECK120000164	lnt	ybeX	ybeZYX-lnt	688566	690104	690129	reverse	24
3	ECK120003910	yphD	yphE	yphFED	2673849	2674847	2674872	reverse	24
3	ECK120004286	hslR	hslO	yrfG-hslRO	3527370	3527771	3527796	forward	24
2	ECK120001282	dusB	fis	dusB-fis	3408302	3409267	3409293	forward	25
4	ECK120002782	ecpC	ecpB	ecpBCDE	306031	308556	308582	reverse	25
5	ECK120000884	rpoA	rpsD	rpsMKD-rpoA-rplQ	3438062	3439051	3439077	reverse	25
2	ECK120002086	seqA	pgm	seqA-pgm	712210	712755	712781	forward	25
2	ECK120000432	hha	tomB	tomB-hha	479314	479532	479558	reverse	25
12	ECK120001721	gmd	wcaF	wcaCDEF-gmd-fcl-gmm-wcaI-cpsBG-wcaJ-wzxC	2125217	2126338	2126364	reverse	25
4	ECK120000689	pepP	ygfB	ygfB-pepP-ubiHI	3051537	3052862	3052888	reverse	25
9	ECK120000097	atpD	atpG	atpIBEFHAGDC	3914016	3915398	3915425	reverse	26
4	ECK120003139	csgG	csgF	csgDEFG	1100074	1100907	1100934	reverse	26
7	ECK120003392	lsrB	lsrF	lsrACDBFG-tam	1603075	1604097	1604124	forward	26
11	ECK120003312	paaJ	paaK	paaABCDEFGHIJK	1458917	1460122	1460149	forward	26
5	ECK120003240	puuD	puuR	puuDRCBE	1359144	1359908	1359935	forward	26
3	ECK120002606	tff	rpsB	tff-rpsB-tsf	189712	189847	189874	forward	26
4	ECK120002200	yadK	yadL	yadMLKC	151003	151599	151626	reverse	26
2	ECK120002769	yagL	yagM	yagML	292444	293142	293169	reverse	26
2	ECK120003074	ycbK	gloC	ycbK-gloC	982298	982846	982873	forward	26
6	ECK120003550	ydjK	ydjL	ydjLKJIHG	1856874	1858253	1858280	reverse	26
5	ECK120003798	yfdK	yfdL	yfdONMLK	2469099	2469539	2469566	reverse	26
2	ECK120001806	yiiS	uspD	yiiS-uspD	4110990	4111289	4111316	forward	26
2	ECK120002430	yqcE	ygcE	yqcE-ygcE	2898614	2899891	2899918	forward	26
2	ECK120004144	yqiJ	yqiK	yqiJK	3190230	3190859	3190886	forward	26
6	ECK120001726	cmtA	cmtB	cmtBA-yggPFDC	3075493	3076881	3076909	reverse	27
2	ECK120000345	fucO	fucA	fucAO	2929887	2931035	2931063	reverse	27
2	ECK120004327	ghoS	ghoT	ghoST	4350607	4350903	4350931	forward	27
4	ECK120003896	iscU	iscS	iscRSUA	2657925	2658311	2658339	reverse	27
2	ECK120002616	isrC	flu	isrC-flu	2069341	2069535	2069563	forward	27
8	ECK120000658	nusA	rimP	metY-rimP-nusA-infB-rbfA-truB-rpsO-pnp	3314061	3315548	3315576	reverse	27
4	ECK120000620	mutY	yggX	mutY-yggX-mltC-nupG	3101035	3102087	3102115	forward	27
4	ECK120000353	fusA	rpsG	rpsLG-fusA-tufA	3469422	3471536	3471564	reverse	27
4	ECK120001084	yajC	secD	tgt-yajC-secDF	426511	426843	426871	forward	27
3	ECK120003230	yciO	yciQ	yciVOQ	1322122	1322742	1322770	forward	27
3	ECK120000202	dapE	ypfN	yffB-dapE-ypfN	2589629	2590756	2590784	forward	27
2	ECK120004175	yhaM	yhaO	yhaOM	3253363	3254673	3254701	reverse	27
2	ECK120001730	lplA	ytjB	ytjB-lplA	4621124	4622140	4622168	reverse	27
6	ECK120003711	gatZ	gatY	gatYZABCD	2173081	2174343	2174372	reverse	28
3	ECK120002489	leuP	leuQ	leuQPV	4604223	4604309	4604338	reverse	28
3	ECK120001121	yebC	nudB	nudB-yebC-ruvC	1945435	1946175	1946204	reverse	28
5	ECK120000680	parE	yqiA	nudF-yqiB-cpdA-yqiA-parE	3171526	3173418	3173447	reverse	28
4	ECK120003200	ymgA	ariR	ycgZ-ymgA-ariR-ymgC	1215291	1215563	1215592	forward	28
5	ECK120004300	yrhA	insAB-6	yhhZ-yrhA-insA-6AB-6B-6	3581064	3581477	3581506	forward	28
3	ECK120004188	yraI	yraJ	yraIJK	3286112	3286807	3286836	forward	28
3	ECK120000020	aceB	aceA	aceBAK	4213501	4215102	4215132	forward	29
5	ECK120001158	garR	garL	garPLRK-rnpB	3269889	3270779	3270809	reverse	29
2	ECK120002080	glnK	amtB	glnK-amtB	471822	472160	472190	forward	29
12	ECK120003879	hyfJ	hyfR	hyfABCDEFGHIJR-focB	2609479	2609892	2609922	forward	29
2	ECK120001106	yciB	yciC	yciCB	1310375	1310914	1310944	reverse	29
3	ECK120001274	ydfB	ydfC	ydfABC	1646689	1646817	1646847	forward	29
2	ECK120003970	ygaX	ygaY	ygaXY	2806338	2806604	2806634	forward	29
4	ECK120001614	atoE	atoB	atoDAEB	2322778	2324100	2324131	forward	30
6	ECK120001513	caiA	caiT	caiTABCDE	39244	40386	40417	reverse	30
3	ECK120000171	cynT	cynS	cynTSX	358023	358682	358713	forward	30
6	ECK120002275	gatB	gatA	gatYZABCD	2172304	2172588	2172619	reverse	30
3	ECK120000201	dapD	glnD	map-glnD-dapD	185123	185947	185978	reverse	30
4	ECK120001012	trmD	rimM	rpsP-rimM-trmD-rplS	2742594	2743361	2743392	reverse	30
5	ECK120000599	mrdA	rlmH	rsfS-rlmH-mrdAB-rlpA	665539	667440	667471	reverse	30
2	ECK120002899	sfmC	sfmD	sfmCD	558197	558889	558920	forward	30
2	ECK120001711	ybfG	ybfH	ybfHG	715170	715580	715611	reverse	30
11	ECK120003245	ycjP	ycjQ	ycjMNOPQRSTUV-ymjB	1372114	1372956	1372987	forward	30
3	ECK120001212	ydiB	aroD	ydiNB-aroD	1771813	1772679	1772710	forward	30
3	ECK120001398	marA	marB	marRAB	1617598	1617981	1618013	forward	31
12	ECK120001210	rpmJ	secY	rplNXE-rpsNH-rplFR-rpsE-rpmD-rplO-secY-rpmJ	3440640	3440756	3440788	reverse	31
2	ECK120003574	yeaV	yeaW	yeaVW	1881212	1882657	1882689	forward	31
2	ECK120003919	yfiP	patZ	yfiP-patZ	2717245	2717943	2717975	forward	31
2	ECK120004110	yghR	yghS	yghSR	3130476	3131234	3131266	reverse	31
3	ECK120000675	pabA	fic	yhfG-fic-pabA	3488288	3488851	3488883	reverse	31
10	ECK120003185	ymfT	ymfL	ymfTLMNROPQ-ycfK-ymfS	1202247	1202447	1202479	forward	31
3	ECK120000170	cynS	cynX	cynTSX	358713	359183	359216	forward	32
5	ECK120000346	fucP	fucI	fucPIKUR	2932257	2933573	2933606	forward	32
5	ECK120002511	rnpB	garK	garPLRK-rnpB	3268238	3268614	3268647	reverse	32
4	ECK120002216	rseA	rpoE	rpoE-rseABC	2706776	2707426	2707459	reverse	32
11	ECK120000857	rplC	rpsJ	rpsJ-rplCDWB-rpsS-rplV-rpsC-rplP-rpmC-rpsQ	3450319	3450948	3450981	reverse	32
10	ECK120001387	waaU	waaZ	waaQGPSBOJYZU	3796262	3797335	3797368	reverse	32
6	ECK120003280	ydaW	rzpR	ydaSTUVW-rzpR	1420776	1421336	1421369	forward	32
2	ECK120003834	yfeK	yfeS	yfeKS	2535364	2535738	2535771	forward	32
3	ECK120002177	gpmM	envC	gpmM-envC-yibQ	3783283	3784827	3784861	forward	33
3	ECK120002504	metZ	metW	metZWV	2945409	2945485	2945519	forward	33
3	ECK120002559	metW	metV	metZWV	2945519	2945595	2945629	forward	33
6	ECK120003775	yfcL	epmC	prmB-aroC-mepA-yfcA-epmC-yfcL	2441913	2442191	2442225	reverse	33
4	ECK120002815	prpC	prpD	prpBCDE	349236	350405	350439	forward	33
12	ECK120000898	rpsH	rpsN	rplNXE-rpsNH-rplFR-rpsE-rpmD-rplO-secY-rpmJ	3444175	3444567	3444601	reverse	33
5	ECK120000894	rpsD	rpsK	rpsMKD-rpoA-rplQ	3439077	3439697	3439731	reverse	33
7	ECK120004178	tdcE	tdcD	tdcABCDEFG	3258146	3260440	3260474	reverse	33
2	ECK120004038	ygeK	ygeL	ygeLK	2992482	2992925	2992959	reverse	33
2	ECK120001779	yihV	yihW	yihVW	4071762	4072658	4072692	forward	33
2	ECK120003228	yciU	clsA	clsA-yciU	1304845	1305174	1305209	reverse	34
3	ECK120002569	frmA	frmR	frmRAB	377686	378795	378830	reverse	34
3	ECK120002493	leuV	leuP	leuQPV	4604102	4604188	4604223	reverse	34
7	ECK120002472	glnW	glnU	metT-leuW-glnUW-metU-glnVX	695979	696053	696088	reverse	34
3	ECK120000914	ruvC	yebC	nudB-yebC-ruvC	1944879	1945400	1945435	reverse	34
6	ECK120000071	aroC	prmB	prmB-aroC-mepA-yfcA-epmC-yfcL	2444410	2445495	2445530	reverse	34
3	ECK120000997	tolB	pal	tolB-pal-cpoB	776963	778255	778290	forward	34
[truncated: 456 more rows]

## Sheet: Genes_Size_GC
Genes size and GC content
[truncated: 4,660 more rows]

## Sheet: GC intergenics
GC and size of intergenics regions
[truncated: 2,522 more rows]

[truncated: 25 more sheets: Protein_genes, Pseudogenes, Phantom Gene, Ribosomal and tRNA genes, Small RNA genes, Overlapping 4 nucleotides, SD, TSS_SD_UT, TSS_Nucleotide, SIGMA24_10_35, SIGMA28_10_35, SIGMA32_10_35, SIGMA38_10_35, SIGMA54_12_24, SIGMA70_10_35, SIGMA24_10_TSS, SIGMA28_10_TSS, SIGMA32_10_TSS, SIGMA38_10_TSS, SIGMA54_12_TSS …]
