# Supplementary material for: Consensus architecture of promoters and transcription units in Escherichia coli : design principles for synthetic biology
Source: Royal Society of Chemistry journal article supplement (doi:10.1039/c6mb00789a), 2017-02-17
Supplement: c6mb00789a5.xlsx [file c6mb00789a5.xlsx]

## Sheet: Sl1344GenesDist
Salmonella enterica enterica serovar Typhimurium str. SL1344, distance between pair of genes
Data source: biocyc.org v20.5
Description of Columns
1.- Gene name
2.- Columns 2 and 3 contains the start and end gene coordinates
4.-Distance in nucleotides between the end of gene 1 and the beggining of gene 2
5.-Transcription-Direction (strand)
Gene name	Left	Right	Dist_Gen2	Strand
GJB7-415	476002	476901	0	reverse
GJB7-895	987030	987413	0	reverse
GJB7-897	988163	989884	0	reverse
GJB7-1320	1426262	1427284	0	reverse
GJB7-1392	1487363	1488421	0	reverse
GJB7-1800	1926234	1927109	0	reverse
GJB7-2058	2161568	2163007	0	reverse
GJB7-2059	2163008	2163952	0	reverse
GJB7-2068	2172833	2173384	0	reverse
GJB7-2502	2663163	2665478	0	reverse
GJB7-3604	3824788	3825540	0	reverse
GJB7-23	25803	28424	0	forward
GJB7-24	28425	29432	0	forward
GJB7-1356	1456240	1456506	0	forward
GJB7-2101	2213241	2216363	0	forward
GJB7-3063	3254468	3255046	0	forward
GJB7-3364	3569518	3570522	0	forward
GJB7-4003	4263074	4263385	0	forward
GJB7-4395	4689596	4690939	0	forward
GJB7-53	61106	61792	1	reverse
GJB7-530	601976	602188	1	reverse
GJB7-629	706256	706897	1	reverse
GJB7-1429	1529785	1530642	1	reverse
GJB7-1954	2065512	2066507	1	reverse
GJB7-1996	2100402	2100683	1	reverse
GJB7-2182	2306685	2307350	1	reverse
GJB7-2263	2395930	2397147	1	reverse
GJB7-2330	2466364	2467467	1	reverse
GJB7-2509	2675576	2675911	1	reverse
GJB7-2534	2703125	2703889	1	reverse
GJB7-2598	2764947	2765417	1	reverse
GJB7-3539	3744818	3745888	1	reverse
GJB7-3545	3749976	3750689	1	reverse
GJB7-3982	4242294	4243535	1	reverse
GJB7-4130	4399483	4400253	1	reverse
GJB7-2	337	2799	1	forward
GJB7-118	139950	140408	1	forward
GJB7-129	152614	153534	1	forward
GJB7-699	782065	782400	1	forward
GJB7-771	854223	855908	1	forward
GJB7-785	871891	872142	1	forward
GJB7-906	1004343	1004960	1	forward
GJB7-1043	1145829	1147295	1	forward
GJB7-1108	1209268	1209915	1	forward
GJB7-1329	1436851	1437252	1	forward
GJB7-1624	1744020	1745012	1	forward
GJB7-1969	2078541	2078783	1	forward
GJB7-2192	2316844	2317869	1	forward
GJB7-2385	2527069	2527431	1	forward
GJB7-2722	2886920	2887495	1	forward
GJB7-2969	3151558	3152976	1	forward
GJB7-3900	4155208	4156338	1	forward
GJB7-4087	4352515	4353393	1	forward
GJB7-4117	4383348	4383731	1	forward
GJB7-89	102286	102663	2	reverse
GJB7-110	129676	131076	2	reverse
GJB7-418	478846	479643	2	reverse
GJB7-419	479646	480506	2	reverse
GJB7-524	597231	597953	2	reverse
GJB7-558	633804	634658	2	reverse
GJB7-623	700318	701430	2	reverse
GJB7-755	837627	838775	2	reverse
GJB7-1390	1486044	1486736	2	reverse
GJB7-1469	1568849	1570651	2	reverse
GJB7-1849	1978703	1979281	2	reverse
GJB7-1918	2037460	2038728	2	reverse
GJB7-1925	2043913	2044500	2	reverse
GJB7-1939	2054744	2055067	2	reverse
GJB7-1950	2063001	2063615	2	reverse
GJB7-1999	2102129	2102923	2	reverse
GJB7-2079	2186216	2187652	2	reverse
GJB7-2081	2188875	2189348	2	reverse
GJB7-2082	2189351	2190316	2	reverse
GJB7-2088	2195196	2195684	2	reverse
GJB7-2208	2332550	2333077	2	reverse
GJB7-2237	2360197	2360847	2	reverse
GJB7-2297	2433701	2434201	2	reverse
GJB7-2566	2740541	2740870	2	reverse
GJB7-2597	2764291	2764944	2	reverse
GJB7-2842	3018197	3019120	2	reverse
GJB7-2876	3051690	3053471	2	reverse
GJB7-3073	3264067	3265083	2	reverse
GJB7-3139	3332358	3333344	2	reverse
GJB7-3503	3701215	3701490	2	reverse
GJB7-3554	3759397	3760065	2	reverse
GJB7-3728	3960279	3961130	2	reverse
GJB7-4074	4335000	4335719	2	reverse
GJB7-4170	4441733	4443478	2	reverse
GJB7-4188	4457808	4458413	2	reverse
GJB7-4510	4823375	4824112	2	reverse
GJB7-49	57344	57793	2	forward
GJB7-115	135901	137562	2	forward
GJB7-124	146318	147400	2	forward
GJB7-582	659409	660164	2	forward
GJB7-763	845702	846391	2	forward
GJB7-783	870904	871416	2	forward
GJB7-829	920865	921785	2	forward
GJB7-955	1062811	1063794	2	forward
GJB7-1145	1246545	1246904	2	forward
GJB7-1335	1441373	1441846	2	forward
GJB7-1337	1443319	1443906	2	forward
GJB7-1351	1452543	1453844	2	forward
GJB7-2027	2126451	2127806	2	forward
GJB7-2269	2401669	2402826	2	forward
GJB7-2423	2558049	2558918	2	forward
GJB7-3653	3879523	3879996	2	forward
GJB7-3693	3926630	3927562	2	forward
GJB7-3822	4067479	4067736	2	forward
GJB7-3881	4133532	4135382	2	forward
GJB7-3948	4202307	4202855	2	forward
GJB7-4072	4331151	4332311	2	forward
GJB7-4220	4492817	4493233	2	forward
GJB7-4334	4627031	4628290	2	forward
GJB7-4344	4638305	4638943	2	forward
GJB7-4379	4668363	4672142	2	forward
GJB7-604	682762	683313	3	reverse
GJB7-625	703365	703832	3	reverse
GJB7-1172	1276340	1277710	3	reverse
GJB7-1391	1486739	1487359	3	reverse
GJB7-1702	1828152	1828961	3	reverse
GJB7-2139	2256618	2257787	3	reverse
GJB7-2355	2491429	2492253	3	reverse
GJB7-2539	2712285	2712920	3	reverse
GJB7-2701	2870709	2870924	3	reverse
GJB7-2704	2871689	2872342	3	reverse
GJB7-2879	3055166	3055957	3	reverse
GJB7-3408	3608848	3609282	3	reverse
GJB7-3409	3609286	3609465	3	reverse
GJB7-3505	3701862	3702881	3	reverse
GJB7-3601	3818743	3819852	3	reverse
GJB7-3749	3989858	3990967	3	reverse
GJB7-3775	4016935	4017225	3	reverse
GJB7-3	2801	3730	3	forward
GJB7-223	264912	265397	3	forward
GJB7-225	266532	266987	3	forward
GJB7-278	319207	319743	3	forward
GJB7-407	468877	469326	3	forward
GJB7-520	593793	594602	3	forward
GJB7-703	786747	787517	3	forward
GJB7-726	812839	813531	3	forward
GJB7-1114	1214389	1214805	3	forward
GJB7-1654	1776965	1778560	3	forward
GJB7-1744	1869671	1870483	3	forward
GJB7-1754	1878734	1880098	3	forward
GJB7-1760	1887122	1887922	3	forward
GJB7-1967	2077110	2077943	3	forward
GJB7-2019	2120759	2121034	3	forward
GJB7-2022	2122149	2122640	3	forward
GJB7-2455	2595050	2595406	3	forward
GJB7-2519	2684160	2685203	3	forward
GJB7-3215	3415899	3416561	3	forward
GJB7-3246	3449315	3449599	3	forward
GJB7-3655	3881288	3882274	3	forward
GJB7-3688	3920432	3921715	3	forward
GJB7-3866	4116922	4117851	3	forward
GJB7-3947	4202049	4202303	3	forward
GJB7-4119	4384436	4384864	3	forward
GJB7-330	379183	380508	4	reverse
GJB7-665	741103	742323	4	reverse
GJB7-1081	1185468	1185863	4	reverse
GJB7-1111	1212761	1213183	4	reverse
GJB7-1846	1974745	1976760	4	reverse
GJB7-1928	2045576	2045989	4	reverse
GJB7-2061	2165334	2166335	4	reverse
GJB7-2065	2169981	2171060	4	reverse
GJB7-2169	2290004	2290393	4	reverse
GJB7-2254	2385246	2386316	4	reverse
GJB7-2699	2869840	2870214	4	reverse
GJB7-2906	3080608	3081369	4	reverse
GJB7-3298	3499017	3499568	4	reverse
GJB7-3388	3594748	3595566	4	reverse
GJB7-3389	3595571	3596143	4	reverse
GJB7-3818	4063833	4064933	4	reverse
GJB7-3983	4243537	4244400	4	reverse
GJB7-4169	4441123	4441728	4	reverse
GJB7-4466	4774524	4776155	4	reverse
GJB7-22	25112	25798	4	forward
GJB7-280	321087	322391	4	forward
GJB7-1004	1110249	1111502	4	forward
GJB7-1235	1332462	1333505	4	forward
GJB7-1276	1373530	1375917	4	forward
GJB7-1524	1636624	1637943	4	forward
GJB7-1897	2020631	2021098	4	forward
GJB7-2029	2128363	2128713	4	forward
GJB7-2474	2612653	2614719	4	forward
GJB7-3725	3955384	3957495	4	forward
GJB7-3899	4154655	4155203	4	forward
GJB7-4361	4651496	4651810	4	forward
GJB7-420	480509	481618	5	reverse
GJB7-822	910608	913040	5	reverse
GJB7-1467	1567541	1568149	5	reverse
GJB7-2067	2171835	2172827	5	reverse
GJB7-2091	2198772	2199221	5	reverse
GJB7-2260	2393574	2393750	5	reverse
GJB7-3033	3222669	3224402	5	reverse
GJB7-3328	3531464	3531964	5	reverse
GJB7-3351	3551420	3553387	5	reverse
GJB7-3701	3934829	3935842	5	reverse
GJB7-460	525840	526100	5	forward
GJB7-3177	3370959	3371630	5	forward
GJB7-3726	3957500	3958189	5	forward
GJB7-3863	4113397	4114902	5	forward
GJB7-4143	4409767	4411164	5	forward
GJB7-867	958831	959547	6	reverse
GJB7-2231	2353432	2354127	6	reverse
GJB7-2288	2422070	2423527	6	reverse
GJB7-2564	2739089	2739826	6	reverse
GJB7-2565	2739833	2740534	6	reverse
GJB7-2689	2863923	2864330	6	reverse
GJB7-2816	2993054	2993127	6	reverse
GJB7-2993	3179479	3180273	6	reverse
GJB7-3148	3340280	3340705	6	reverse
GJB7-3577	3784500	3785258	6	reverse
GJB7-350	402817	404775	6	forward
GJB7-423	483694	484797	6	forward
GJB7-733	818396	818468	6	forward
GJB7-1333	1440510	1440779	6	forward
GJB7-1564	1680744	1681505	6	forward
GJB7-3305	3504493	3505047	6	forward
GJB7-4360	4651094	4651489	6	forward
GJB7-1499	1605748	1606389	7	reverse
GJB7-1575	1693484	1693807	7	reverse
GJB7-1651	1773633	1774253	7	reverse
GJB7-2570	2744721	2745467	7	reverse
GJB7-3299	3499573	3500355	7	reverse
GJB7-3352	3553393	3554325	7	reverse
GJB7-3407	3607509	3608840	7	reverse
GJB7-3436	3624317	3624604	7	reverse
GJB7-4281	4580663	4580932	7	reverse
GJB7-45	52649	52864	7	forward
GJB7-789	874226	874834	7	forward
GJB7-1211	1309798	1309983	7	forward
GJB7-1331	1438728	1439939	7	forward
GJB7-2390	2529791	2529863	7	forward
GJB7-2649	2818166	2818675	7	forward
GJB7-2677	2851713	2853893	7	forward
GJB7-3092	3282933	3283223	7	forward
GJB7-3862	4112970	4113389	7	forward
GJB7-4093	4360951	4361955	7	forward
GJB7-172	203987	205066	8	reverse
GJB7-687	769105	769689	8	reverse
GJB7-877	968520	969491	8	reverse
GJB7-1994	2098914	2099729	8	reverse
GJB7-2150	2270695	2271339	8	reverse
GJB7-2646	2816456	2816794	8	reverse
GJB7-3358	3562726	3563319	8	reverse
GJB7-3852	4100663	4101478	8	reverse
GJB7-3976	4234295	4235704	8	reverse
GJB7-1199	1302170	1302496	8	forward
GJB7-1305	1409167	1409535	8	forward
GJB7-1902	2023641	2023910	8	forward
GJB7-3260	3460978	3461973	8	forward
GJB7-3707	3940718	3941929	8	forward
GJB7-137	162267	162458	9	reverse
GJB7-142	166323	167708	9	reverse
GJB7-605	683317	684846	9	reverse
GJB7-1425	1526525	1527172	9	reverse
GJB7-2228	2351399	2352001	9	reverse
GJB7-2429	2563383	2564042	9	reverse
GJB7-2685	2860773	2861288	9	reverse
GJB7-2840	3015918	3016460	9	reverse
GJB7-2925	3095503	3096942	9	reverse
GJB7-3031	3219939	3221456	9	reverse
GJB7-3411	3609987	3610340	9	reverse
GJB7-3500	3693347	3695425	9	reverse
GJB7-3513	3711607	3712152	9	reverse
GJB7-3612	3833659	3834561	9	reverse
GJB7-3637	3861085	3863154	9	reverse
GJB7-3691	3924196	3925221	9	reverse
GJB7-3759	4000864	4001133	9	reverse
GJB7-3768	4009026	4010354	9	reverse
GJB7-3955	4209682	4210845	9	reverse
GJB7-3990	4252183	4253034	9	reverse
GJB7-4063	4320588	4321919	9	reverse
GJB7-4177	4448898	4449620	9	reverse
GJB7-4261	4553931	4555001	9	reverse
GJB7-161	192407	193390	9	forward
GJB7-518	590848	592512	9	forward
GJB7-536	608163	609170	9	forward
GJB7-579	655743	656918	9	forward
GJB7-730	816702	817226	9	forward
GJB7-857	948845	949978	9	forward
GJB7-863	955159	955479	9	forward
GJB7-902	998133	998747	9	forward
GJB7-987	1087228	1087923	9	forward
GJB7-1044	1147297	1148148	9	forward
GJB7-1048	1150358	1151734	9	forward
GJB7-1655	1778564	1779922	9	forward
GJB7-1790	1918122	1918280	9	forward
GJB7-1901	2022894	2023631	9	forward
GJB7-2016	2118037	2118558	9	forward
GJB7-2023	2122644	2122919	9	forward
GJB7-2190	2313935	2315740	9	forward
GJB7-2788	2968677	2968916	9	forward
GJB7-3253	3456449	3457039	9	forward
GJB7-3317	3515940	3520400	9	forward
GJB7-3687	3918878	3920422	9	forward
GJB7-3944	4198836	4199591	9	forward
GJB7-4038	4298387	4299346	9	forward
GJB7-4051	4310544	4310837	9	forward
GJB7-4114	4381662	4381733	9	forward
GJB7-4137	4405476	4406540	9	forward
GJB7-4329	4620945	4622264	9	forward
GJB7-4343	4637897	4638295	9	forward
GJB7-4353	4647226	4647531	9	forward
GJB7-4355	4648019	4648669	9	forward
GJB7-88	101427	102275	10	reverse
GJB7-101	118080	119582	10	reverse
GJB7-109	129060	129665	10	reverse
GJB7-264	304656	305711	10	reverse
GJB7-434	494675	496666	10	reverse
GJB7-515	587415	588200	10	reverse
GJB7-622	699240	700307	10	reverse
GJB7-756	838778	839824	10	reverse
GJB7-874	964160	965593	10	reverse
GJB7-948	1056703	1057812	10	reverse
GJB7-1430	1530644	1531261	10	reverse
GJB7-1840	1969195	1969839	10	reverse
GJB7-1953	2064878	2065501	10	reverse
GJB7-2007	2108538	2109170	10	reverse
GJB7-2073	2177743	2179146	10	reverse
GJB7-2292	2427514	2428068	10	reverse
GJB7-2323	2459847	2460623	10	reverse
GJB7-2435	2570263	2571102	10	reverse
GJB7-2491	2650764	2651942	10	reverse
GJB7-2540	2712924	2714285	10	reverse
GJB7-2574	2747770	2748153	10	reverse
GJB7-2931	3102098	3102844	10	reverse
GJB7-3107	3297083	3297517	10	reverse
GJB7-3238	3441185	3442132	10	reverse
GJB7-3381	3588205	3588277	10	reverse
GJB7-3399	3603447	3603872	10	reverse
GJB7-3416	3612196	3612510	10	reverse
GJB7-3426	3616423	3617028	10	reverse
GJB7-3443	3628482	3628682	10	reverse
GJB7-3602	3819856	3822156	10	reverse
GJB7-3611	3832665	3833648	10	reverse
GJB7-3752	3992723	3993208	10	reverse
GJB7-4082	4345256	4345918	10	reverse
GJB7-4311	4603060	4603419	10	reverse
GJB7-4312	4603430	4603825	10	reverse
GJB7-4433	4728965	4729897	10	reverse
GJB7-4457	4757260	4759344	10	reverse
GJB7-4497	4806883	4807839	10	reverse
GJB7-61	70003	70872	10	forward
GJB7-340	390542	391183	10	forward
GJB7-400	461817	463664	10	forward
GJB7-826	916410	917351	10	forward
GJB7-834	925875	926729	10	forward
GJB7-905	1001888	1004332	10	forward
GJB7-956	1063797	1064546	10	forward
GJB7-1046	1148681	1149484	10	forward
GJB7-1072	1177964	1179244	10	forward
GJB7-1141	1240404	1241408	10	forward
GJB7-1148	1247914	1248738	10	forward
GJB7-1412	1512549	1514078	10	forward
GJB7-1438	1539102	1540316	10	forward
GJB7-1544	1659766	1660047	10	forward
GJB7-2014	2115673	2117337	10	forward
GJB7-2107	2224446	2225162	10	forward
GJB7-2520	2685207	2686025	10	forward
GJB7-2606	2771095	2774295	10	forward
GJB7-2747	2912676	2913656	10	forward
GJB7-2778	2958155	2958589	10	forward
GJB7-2799	2975058	2977202	10	forward
GJB7-2913	3086336	3087763	10	forward
GJB7-3003	3192086	3193114	10	forward
GJB7-3160	3353326	3353808	10	forward
GJB7-3240	3443310	3444164	10	forward
GJB7-3483	3673903	3674571	10	forward
GJB7-4037	4297042	4298376	10	forward
GJB7-4407	4704524	4704862	10	forward
GJB7-95	109334	109993	11	reverse
GJB7-431	492840	493730	11	reverse
GJB7-567	639166	640284	11	reverse
GJB7-661	737961	738042	11	reverse
GJB7-1175	1279602	1280063	11	reverse
GJB7-1317	1420909	1421646	11	reverse
GJB7-1551	1664695	1665897	11	reverse
GJB7-1673	1793477	1794484	11	reverse
GJB7-2152	2272065	2273102	11	reverse
GJB7-2431	2564967	2566328	11	reverse
GJB7-2436	2571113	2572516	11	reverse
GJB7-2508	2675364	2675564	11	reverse
GJB7-2548	2720159	2720890	11	reverse
GJB7-2549	2720902	2721630	11	reverse
GJB7-2713	2880640	2880873	11	reverse
GJB7-2934	3104484	3106040	11	reverse
GJB7-3732	3965890	3968208	11	reverse
GJB7-3771	4012531	4013544	11	reverse
GJB7-4081	4344141	4345244	11	reverse
GJB7-4145	4412492	4413781	11	reverse
GJB7-4462	4767568	4771209	11	reverse
GJB7-220	260122	260979	11	forward
GJB7-315	365793	366896	11	forward
GJB7-346	398046	400334	11	forward
GJB7-519	592522	593781	11	forward
GJB7-1115	1214809	1215213	11	forward
GJB7-1120	1218788	1219486	11	forward
GJB7-1343	1446645	1446872	11	forward
GJB7-1547	1662323	1662760	11	forward
GJB7-1721	1847246	1848790	11	forward
GJB7-2025	2123936	2125330	11	forward
GJB7-2777	2957166	2958143	11	forward
GJB7-2825	3001444	3002415	11	forward
GJB7-2826	3002427	3002789	11	forward
GJB7-3126	3318126	3319598	11	forward
GJB7-3369	3573686	3575137	11	forward
GJB7-3377	3582524	3583681	11	forward
GJB7-3463	3648130	3648939	11	forward
GJB7-3650	3876954	3877952	11	forward
GJB7-3654	3879999	3881276	11	forward
GJB7-3873	4126828	4126901	11	forward
GJB7-3893	4148618	4149721	11	forward
GJB7-3916	4171105	4171647	11	forward
GJB7-3959	4215218	4216669	11	forward
GJB7-4028	4288667	4289356	11	forward
GJB7-4112	4381377	4381449	11	forward
GJB7-4140	4408040	4408312	11	forward
GJB7-4410	4705560	4706336	11	forward
GJB7-4437	4733500	4733916	11	forward
GJB7-55	63548	64849	12	reverse
GJB7-1462	1564527	1564868	12	reverse
GJB7-1766	1893115	1893324	12	reverse
GJB7-2085	2192034	2192780	12	reverse
GJB7-2428	2562876	2563370	12	reverse
GJB7-2442	2575739	2576218	12	reverse
GJB7-2510	2675913	2677763	12	reverse
GJB7-2577	2749664	2750011	12	reverse
GJB7-2995	3181371	3183617	12	reverse
GJB7-3412	3610350	3610883	12	reverse
GJB7-3420	3613501	3613911	12	reverse
GJB7-3848	4097745	4099286	12	reverse
GJB7-3984	4244405	4245430	12	reverse
GJB7-4007	4265281	4266183	12	reverse
GJB7-4187	4457481	4457795	12	reverse
GJB7-4427	4724079	4724540	12	reverse
GJB7-4479	4786676	4787848	12	reverse
GJB7-219	259351	260109	12	forward
GJB7-229	269544	273026	12	forward
GJB7-288	332062	332508	12	forward
GJB7-507	576955	578736	12	forward
GJB7-549	621298	621534	12	forward
GJB7-701	784576	785472	12	forward
GJB7-748	829385	831160	12	forward
GJB7-1002	1106206	1108314	12	forward
GJB7-1134	1234423	1235352	12	forward
GJB7-1254	1351797	1353152	12	forward
GJB7-1309	1413037	1414257	12	forward
GJB7-1487	1590134	1591585	12	forward
GJB7-1722	1848802	1849938	12	forward
GJB7-2411	2548304	2548684	12	forward
GJB7-3493	3685658	3687976	12	forward
GJB7-4505	4817210	4818046	12	forward
GJB7-4553	4864327	4864800	12	forward
GJB7-471	538423	538590	13	reverse
GJB7-1294	1393556	1394707	13	reverse
GJB7-1359	1458502	1458575	13	reverse
GJB7-1451	1553947	1554336	13	reverse
GJB7-1500	1606397	1607281	13	reverse
GJB7-1731	1858458	1859528	13	reverse
GJB7-2124	2241571	2244060	13	reverse
GJB7-2210	2334382	2334900	13	reverse
GJB7-2492	2651953	2652573	13	reverse
GJB7-2932	3102855	3103913	13	reverse
GJB7-3072	3263046	3264053	13	reverse
GJB7-3278	3482460	3482543	13	reverse
GJB7-4538	4847047	4849455	13	reverse
GJB7-580	656928	658538	13	forward
GJB7-715	798133	799899	13	forward
GJB7-982	1082233	1082496	13	forward
GJB7-1118	1217182	1217937	13	forward
GJB7-1146	1246907	1247281	13	forward
GJB7-1545	1660058	1661371	13	forward
GJB7-2655	2820291	2823074	13	forward
GJB7-3301	3501430	3502365	13	forward
GJB7-3813	4056670	4057932	13	forward
GJB7-4204	4475990	4476487	13	forward
GJB7-4275	4573172	4575601	13	forward
GJB7-4354	4647541	4648005	13	forward
GJB7-631	707930	708520	14	reverse
GJB7-742	824174	824719	14	reverse
GJB7-1674	1794496	1795404	14	reverse
GJB7-1865	1992933	1993016	14	reverse
GJB7-1941	2055321	2056526	14	reverse
GJB7-2038	2135797	2136375	14	reverse
GJB7-2149	2269487	2270680	14	reverse
GJB7-2166	2287003	2288145	14	reverse
GJB7-2213	2336900	2337268	14	reverse
GJB7-2245	2374473	2375675	14	reverse
GJB7-2279	2411715	2412572	14	reverse
GJB7-2293	2428079	2428621	14	reverse
GJB7-2599	2765419	2766084	14	reverse
GJB7-2683	2860282	2860401	14	reverse
GJB7-3117	3307823	3308197	14	reverse
GJB7-3410	3609469	3609972	14	reverse
GJB7-3415	3611642	3612181	14	reverse
GJB7-3422	3614643	3614975	14	reverse
GJB7-3522	3724134	3725429	14	reverse
GJB7-3834	4081311	4082036	14	reverse
GJB7-3849	4099299	4099832	14	reverse
GJB7-4000	4261087	4261515	14	reverse
GJB7-4198	4468039	4468929	14	reverse
GJB7-151	176244	178907	14	forward
GJB7-323	373674	374300	14	forward
GJB7-369	429947	431065	14	forward
GJB7-535	605536	608148	14	forward
GJB7-717	801156	803957	14	forward
GJB7-722	810524	811663	14	forward
GJB7-1003	1108327	1110234	14	forward
GJB7-1123	1221610	1223271	14	forward
GJB7-1267	1365073	1365387	14	forward
GJB7-1882	2006970	2008373	14	forward
GJB7-2015	2117348	2118022	14	forward
GJB7-2409	2546219	2547511	14	forward
GJB7-2782	2962710	2964158	14	forward
GJB7-3182	3377022	3377693	14	forward
GJB7-3244	3447534	3448805	14	forward
GJB7-3896	4151962	4153224	14	forward
GJB7-4084	4348739	4349818	14	forward
GJB7-4502	4815517	4815939	14	forward
GJB7-266	306714	308597	15	reverse
GJB7-1816	1942648	1943967	15	reverse
GJB7-2084	2191464	2192018	15	reverse
GJB7-2123	2240548	2241555	15	reverse
GJB7-2151	2271348	2272049	15	reverse
GJB7-2162	2281654	2282664	15	reverse
GJB7-2299	2436093	2436755	15	reverse
GJB7-2458	2596792	2598810	15	reverse
GJB7-2988	3174174	3177545	15	reverse
GJB7-3288	3491635	3492807	15	reverse
GJB7-3331	3533823	3534215	15	reverse
GJB7-3338	3540149	3541450	15	reverse
GJB7-3339	3541466	3543241	15	reverse
GJB7-3927	4180719	4181099	15	reverse
GJB7-3991	4253044	4254285	15	reverse
GJB7-4390	4684521	4686026	15	reverse
GJB7-25	29433	29978	15	forward
GJB7-51	58946	60148	15	forward
GJB7-76	88687	89457	15	forward
GJB7-120	141348	141713	15	forward
GJB7-693	777459	778202	15	forward
GJB7-721	808940	810508	15	forward
GJB7-747	829124	829369	15	forward
GJB7-1133	1233454	1234407	15	forward
GJB7-1275	1372531	1373514	15	forward
GJB7-1336	1441849	1443303	15	forward
GJB7-1339	1444377	1444811	15	forward
GJB7-1548	1662772	1663404	15	forward
GJB7-3393	3598418	3598927	15	forward
GJB7-3532	3737959	3738906	15	forward
GJB7-3935	4187405	4188421	15	forward
GJB7-4041	4301279	4301443	15	forward
GJB7-4098	4367017	4367652	15	forward
GJB7-4277	4576234	4577007	15	forward
GJB7-4352	4645813	4647210	15	forward
GJB7-16	16493	17026	16	reverse
GJB7-56	64862	66637	16	reverse
GJB7-185	217026	217730	16	reverse
GJB7-343	391905	393362	16	reverse
GJB7-1031	1134195	1134536	16	reverse
GJB7-1799	1925864	1926217	16	reverse
GJB7-2178	2301297	2302985	16	reverse
GJB7-2461	2600708	2601742	16	reverse
GJB7-2552	2723498	2724472	16	reverse
GJB7-2705	2872346	2873428	16	reverse
GJB7-2729	2894442	2895008	16	reverse
GJB7-2965	3145967	3147115	16	reverse
GJB7-3423	3614990	3615268	16	reverse
GJB7-354	409652	410662	16	forward
GJB7-633	711405	711695	16	forward
GJB7-1306	1409544	1411031	16	forward
GJB7-2241	2365024	2367693	16	forward
GJB7-2806	2984354	2985526	16	forward
GJB7-3820	4066999	4067139	16	forward
GJB7-3969	4224634	4225620	16	forward
GJB7-4230	4502472	4503749	16	forward
GJB7-4328	4620467	4620928	16	forward
GJB7-4414	4709283	4710023	16	forward
GJB7-868	959554	960285	17	reverse
GJB7-1039	1141518	1142030	17	reverse
GJB7-1464	1565756	1566817	17	reverse
GJB7-1841	1969850	1970239	17	reverse
GJB7-2568	2743940	2744257	17	reverse
GJB7-2841	3016470	3018179	17	reverse
GJB7-2923	3094537	3094893	17	reverse
GJB7-3421	3613924	3614625	17	reverse
GJB7-3424	3615285	3616106	17	reverse
GJB7-3470	3659514	3660191	17	reverse
GJB7-3700	3933801	3934811	17	reverse
GJB7-3764	4005261	4005734	17	reverse
GJB7-4558	4869517	4870074	17	reverse
GJB7-194	231299	233956	17	forward
GJB7-1345	1447129	1447878	17	forward
GJB7-2868	3042432	3044093	17	forward
GJB7-3658	3884426	3885286	17	forward
GJB7-3782	4024411	4025748	17	forward
GJB7-3879	4132164	4132424	17	forward
GJB7-4342	4637196	4637879	17	forward
GJB7-4506	4818059	4819120	17	forward
GJB7-539	610980	611702	18	reverse
GJB7-658	737661	737734	18	reverse
GJB7-1014	1120014	1122167	18	reverse
GJB7-2430	2564052	2564948	18	reverse
GJB7-2662	2827261	2827809	18	reverse
GJB7-2864	3038327	3038632	18	reverse
GJB7-2872	3046988	3047236	18	reverse
GJB7-2873	3047255	3049312	18	reverse
GJB7-2921	3093306	3094016	18	reverse
GJB7-2956	3136539	3136988	18	reverse
GJB7-2973	3155320	3155715	18	reverse
GJB7-3297	3498363	3498998	18	reverse
GJB7-4025	4286131	4286646	18	reverse
GJB7-37	41723	42913	18	forward
GJB7-67	75883	77031	18	forward
GJB7-1160	1261987	1262898	18	forward
GJB7-1716	1842796	1844589	18	forward
GJB7-2013	2114953	2115654	18	forward
GJB7-2018	2120390	2120740	18	forward
GJB7-3090	3281647	3282351	18	forward
GJB7-3187	3380486	3381106	18	forward
GJB7-3484	3674582	3674983	18	forward
GJB7-3492	3685412	3685639	18	forward
GJB7-3724	3955090	3955365	18	forward
GJB7-4305	4600191	4600757	18	forward
GJB7-4393	4687565	4688470	18	forward
GJB7-649	729583	731121	19	reverse
GJB7-891	984216	984893	19	reverse
GJB7-1774	1898702	1900750	19	reverse
GJB7-1832	1958592	1959338	19	reverse
GJB7-2700	2870219	2870689	19	reverse
GJB7-3290	3493918	3494175	19	reverse
GJB7-3337	3539398	3540129	19	reverse
GJB7-3520	3720234	3722681	19	reverse
GJB7-1660	1783260	1783766	19	forward
GJB7-2446	2580246	2581196	19	forward
GJB7-3084	3276843	3277622	19	forward
GJB7-3181	3375206	3377002	19	forward
GJB7-163	194197	194991	20	reverse
GJB7-688	769698	771746	20	reverse
GJB7-1059	1161297	1161524	20	reverse
GJB7-1598	1717202	1718032	20	reverse
GJB7-1845	1974221	1974724	20	reverse
GJB7-1874	1998929	1999597	20	reverse
GJB7-2227	2350761	2351378	20	reverse
GJB7-2314	2452638	2454029	20	reverse
GJB7-2953	3132002	3133342	20	reverse
GJB7-3231	3430739	3432070	20	reverse
GJB7-3710	3943352	3943519	20	reverse
GJB7-3845	4094982	4095401	20	reverse
GJB7-4058	4315780	4317288	20	reverse
GJB7-409	470522	470992	20	forward
GJB7-1117	1215950	1217161	20	forward
GJB7-2424	2558921	2559820	20	forward
GJB7-3302	3502379	3503365	20	forward
GJB7-516	588211	589446	21	reverse
GJB7-950	1060835	1061134	21	reverse
GJB7-1291	1390406	1391341	21	reverse
GJB7-1315	1418592	1419935	21	reverse
GJB7-2075	2180374	2181654	21	reverse
GJB7-3060	3251412	3252575	21	reverse
GJB7-3911	4164666	4165835	21	reverse
GJB7-296	343044	345554	21	forward
GJB7-782	869893	870882	21	forward
GJB7-1894	2017477	2018847	21	forward
GJB7-2781	2961420	2962688	21	forward
GJB7-3252	3456032	3456427	21	forward
GJB7-3395	3599942	3601231	21	forward
GJB7-4525	4833234	4833680	21	forward
GJB7-466	528735	531884	22	reverse
GJB7-1616	1737717	1737935	22	reverse
GJB7-3621	3845430	3847958	22	reverse
GJB7-3992	4254301	4255179	22	reverse
GJB7-4282	4580940	4581155	22	reverse
GJB7-398	460307	461434	22	forward
GJB7-513	584866	586164	22	forward
GJB7-3307	3505827	3507260	22	forward
GJB7-4409	4705235	4705537	22	forward
GJB7-183	215429	216370	23	reverse
GJB7-414	474116	475978	23	reverse
GJB7-2083	2190319	2191440	23	reverse
GJB7-2750	2916251	2916886	23	reverse
GJB7-2886	3060545	3060952	23	reverse
GJB7-3109	3298878	3299405	23	reverse
GJB7-228	268924	269520	23	forward
GJB7-271	313924	314466	23	forward
GJB7-285	328491	328907	23	forward
GJB7-287	329849	332038	23	forward
GJB7-295	342307	343020	23	forward
GJB7-788	873495	874202	23	forward
GJB7-1076	1182228	1182965	23	forward
GJB7-1743	1868940	1869647	23	forward
GJB7-1803	1927960	1928616	23	forward
GJB7-3651	3877964	3878428	23	forward
GJB7-3907	4162584	4162656	23	forward
GJB7-1162	1263820	1264866	24	reverse
GJB7-2538	2711709	2712260	24	reverse
GJB7-2645	2815382	2816431	24	reverse
GJB7-2865	3038651	3038893	24	reverse
GJB7-2887	3060976	3063033	24	reverse
GJB7-3108	3297528	3298853	24	reverse
GJB7-3173	3367167	3367994	24	reverse
GJB7-3272	3474315	3476993	24	reverse
GJB7-4389	4683687	4684496	24	reverse
GJB7-4450	4747757	4748521	24	reverse
GJB7-680	758602	759144	24	forward
GJB7-737	819489	820532	24	forward
GJB7-1149	1248749	1249774	24	forward
GJB7-1565	1681512	1682159	24	forward
GJB7-1968	2077947	2078516	24	forward
GJB7-3864	4114908	4115873	24	forward
GJB7-2261	2393756	2394559	25	reverse
GJB7-2880	3055961	3056221	25	reverse
GJB7-3045	3235893	3236282	25	reverse
GJB7-3226	3422720	3424030	25	reverse
GJB7-3235	3437158	3438048	25	reverse
GJB7-3402	3604783	3605772	25	reverse
GJB7-402	464794	465159	25	forward
GJB7-1022	1128494	1129042	25	forward
GJB7-1663	1785722	1786126	25	forward
GJB7-2780	2960408	2961394	25	forward
GJB7-3062	3254017	3254442	25	forward
GJB7-3371	3576691	3577656	25	forward
GJB7-4503	4815954	4816415	25	forward
GJB7-173	205075	207621	26	reverse
GJB7-660	737863	737934	26	reverse
GJB7-1080	1185025	1185441	26	reverse
GJB7-1231	1327968	1328624	26	reverse
GJB7-1990	2095018	2096088	26	reverse
GJB7-2064	2168641	2169954	26	reverse
GJB7-2328	2464298	2464867	26	reverse
GJB7-2494	2653972	2655090	26	reverse
GJB7-2836	3013445	3014254	26	reverse
GJB7-3390	3596148	3596690	26	reverse
GJB7-3846	4095422	4096804	26	reverse
GJB7-381	440331	440876	26	forward
GJB7-1116	1215225	1215923	26	forward
GJB7-3241	3444175	3445089	26	forward
GJB7-464	527619	527837	27	reverse
GJB7-2063	2167714	2168613	27	reverse
GJB7-2195	2320199	2321389	27	reverse
GJB7-2199	2324542	2325162	27	reverse
GJB7-2513	2678839	2679225	27	reverse
GJB7-2573	2747164	2747742	27	reverse
GJB7-2875	3050433	3051662	27	reverse
GJB7-3133	3327905	3328153	27	reverse
GJB7-3171	3364666	3366558	27	reverse
GJB7-3273	3477018	3478520	27	reverse
GJB7-399	461457	461789	27	forward
GJB7-936	1043688	1044236	27	forward
GJB7-2456	2595410	2596537	27	forward
GJB7-3100	3289388	3290440	27	forward
GJB7-1426	1527182	1528084	28	reverse
GJB7-1450	1553703	1553918	28	reverse
GJB7-2512	2678487	2678810	28	reverse
GJB7-3816	4060169	4062583	28	reverse
GJB7-1159	1260714	1261958	28	forward
GJB7-3083	3276107	3276814	28	forward
GJB7-4048	4307508	4308509	28	forward
GJB7-4049	4308538	4309560	28	forward
GJB7-211	249285	250109	29	reverse
GJB7-1824	1951353	1952093	29	reverse
GJB7-3414	3611322	3611612	29	reverse
GJB7-59	68637	69683	29	forward
GJB7-801	886512	888557	29	forward
GJB7-862	953786	955129	29	forward
GJB7-2186	2309225	2310211	29	forward
GJB7-3949	4202858	4203637	29	forward
GJB7-624	701433	703334	30	reverse
GJB7-1327	1433019	1433657	30	reverse
GJB7-1952	2064488	2064847	30	reverse
GJB7-2295	2429610	2432336	30	reverse
GJB7-3772	4013556	4014872	30	reverse
GJB7-4521	4831333	4831416	30	reverse
GJB7-534	604813	605505	30	forward
GJB7-570	643490	644704	30	forward
GJB7-885	978884	979204	30	forward
GJB7-3245	3448820	3449284	30	forward
GJB7-643	723699	724937	31	reverse
GJB7-1558	1674526	1675644	31	reverse
GJB7-2613	2779159	2779809	31	reverse
GJB7-3406	3607361	3607477	31	reverse
GJB7-3456	3641242	3641805	31	reverse
GJB7-3703	3936997	3937230	31	reverse
GJB7-221	260991	262343	31	forward
GJB7-238	281229	281651	31	forward
GJB7-454	520012	520350	31	forward
GJB7-2201	2326377	2326604	31	forward
GJB7-2768	2943912	2945156	31	forward
GJB7-2967	3148334	3149650	31	forward
GJB7-3169	3363614	3364195	31	forward
GJB7-4153	4423328	4424929	31	forward
GJB7-4216	4487883	4489298	31	forward
GJB7-557	632728	633771	32	reverse
GJB7-1531	1647836	1648066	32	reverse
GJB7-2352	2489764	2490039	32	reverse
GJB7-2720	2885953	2886462	32	reverse
GJB7-3342	3544284	3545183	32	reverse
GJB7-3427	3617039	3617668	32	reverse
GJB7-827	917362	919233	32	forward
GJB7-2171	2291982	2292869	32	forward
GJB7-2981	3162526	3162599	32	forward
GJB7-3897	4153239	4154291	32	forward
GJB7-1931	2047582	2048922	33	reverse
GJB7-3229	3427137	3429431	33	reverse
GJB7-3403	3605798	3606418	33	reverse
GJB7-3413	3610896	3611288	33	reverse
GJB7-4542	4851993	4853009	33	reverse
GJB7-282	323372	323803	33	forward
GJB7-325	375193	376107	33	forward
GJB7-1669	1789721	1791181	33	forward
GJB7-3920	4173567	4173770	33	forward
GJB7-3994	4256257	4257159	33	forward
GJB7-4193	4463546	4463788	33	forward
GJB7-74	85512	86654	34	reverse
GJB7-1926	2044503	2045024	34	reverse
GJB7-2592	2762220	2762822	34	reverse
GJB7-3928	4181115	4181573	34	reverse
GJB7-4520	4831215	4831298	34	reverse
GJB7-729	815375	816667	34	forward
GJB7-1049	1151744	1152640	34	forward
GJB7-4161	4436046	4436147	34	forward
GJB7-10	10092	10805	35	reverse
GJB7-1435	1537564	1538124	35	reverse
GJB7-2119	2237195	2237941	35	reverse
GJB7-2224	2349107	2349280	35	reverse
GJB7-2356	2492257	2493342	35	reverse
GJB7-4428	4724553	4725488	35	reverse
GJB7-1107	1208648	1209232	35	forward
GJB7-2739	2905815	2906030	35	forward
GJB7-203	240605	241228	36	reverse
GJB7-1823	1950795	1951316	36	reverse
GJB7-4293	4587351	4587926	36	reverse
GJB7-500	570600	571430	36	forward
GJB7-923	1024701	1026965	36	forward
GJB7-602	680393	681856	37	reverse
GJB7-1701	1827260	1828114	37	reverse
GJB7-1810	1934510	1935151	37	reverse
GJB7-2334	2472052	2473569	37	reverse
GJB7-2578	2750024	2751472	37	reverse
GJB7-2545	2718443	2719369	37	forward
GJB7-4337	4631181	4631606	37	forward
GJB7-243	285514	286329	38	reverse
GJB7-659	737753	737824	38	reverse
GJB7-875	965604	966605	38	reverse
GJB7-2094	2202707	2204563	38	reverse
GJB7-2561	2734839	2735081	38	reverse
GJB7-3071	3262534	3263007	38	reverse
GJB7-3122	3312886	3313809	38	reverse
GJB7-3958	4214565	4215179	38	forward
GJB7-42	48372	50411	39	reverse
GJB7-2905	3079618	3080568	39	reverse
GJB7-362	418473	419642	39	forward
GJB7-2467	2605687	2607150	39	forward
GJB7-3695	3928611	3929564	39	forward
GJB7-4231	4503766	4520445	39	forward
GJB7-946	1056132	1056380	40	reverse
GJB7-1099	1202408	1202521	40	reverse
GJB7-1705	1830184	1831266	40	reverse
GJB7-2438	2572928	2573218	40	reverse
GJB7-2660	2826061	2826408	40	reverse
GJB7-3020	3209159	3209902	40	reverse
GJB7-3380	3588043	3588164	40	reverse
GJB7-3401	3604359	3604742	40	reverse
GJB7-4557	4868391	4869476	40	reverse
GJB7-363	419682	421133	40	forward
GJB7-451	515754	516212	40	forward
GJB7-972	1072934	1073467	40	forward
GJB7-1342	1446389	1446604	40	forward
GJB7-1829	1956209	1956604	40	forward
GJB7-2405	2542608	2544335	40	forward
GJB7-2608	2775458	2775697	40	forward
GJB7-4136	4404662	4405435	40	forward
GJB7-1083	1187273	1187728	41	forward
GJB7-1229	1326853	1327296	41	forward
GJB7-2784	2965586	2966986	41	forward
GJB7-3159	3352301	3353284	41	forward
GJB7-4124	4391344	4395567	41	forward
GJB7-4138	4406550	4407221	41	forward
GJB7-4362	4651815	4652042	41	forward
GJB7-947	1056421	1056660	42	reverse
GJB7-1428	1529128	1529742	42	reverse
GJB7-2225	2349316	2350062	42	reverse
GJB7-4288	4584169	4584921	42	reverse
GJB7-4318	4609814	4613116	42	reverse
GJB7-860	951857	952330	42	forward
GJB7-2607	2774306	2775415	42	forward
GJB7-97	113085	115436	43	reverse
GJB7-436	498086	499561	43	reverse
GJB7-1909	2029188	2029406	43	reverse
GJB7-3684	3917350	3917817	43	reverse
GJB7-3929	4181608	4182492	43	reverse
GJB7-3989	4250103	4252139	43	reverse
GJB7-4444	4741031	4742542	43	reverse
GJB7-533	604236	604769	43	forward
GJB7-925	1028747	1029724	43	forward
GJB7-3247	3449603	3450976	43	forward
GJB7-3517	3716593	3718308	43	forward
GJB7-3672	3901816	3902499	43	forward
GJB7-4300	4595355	4595648	43	forward
GJB7-896	987414	988118	44	reverse
GJB7-945	1054795	1056087	44	reverse
GJB7-1296	1396470	1397228	44	reverse
GJB7-2661	2826449	2827216	44	reverse
GJB7-3859	4107616	4109016	44	reverse
GJB7-46	52872	53810	44	forward
GJB7-2389	2529674	2529746	44	forward
GJB7-2626	2793068	2794423	44	forward
GJB7-2741	2908638	2909921	44	forward
GJB7-3156	3347286	3348587	44	forward
GJB7-568	640296	641000	45	reverse
GJB7-2043	2145186	2146100	45	reverse
GJB7-2383	2526657	2526729	45	reverse
GJB7-3987	4247208	4248629	45	reverse
GJB7-3988	4248675	4250057	45	reverse
GJB7-4461	4763845	4767522	45	reverse
GJB7-4559	4870092	4872629	45	reverse
GJB7-474	540395	542323	45	forward
GJB7-980	1081040	1081726	45	forward
GJB7-1070	1175783	1176943	45	forward
GJB7-1471	1572186	1573277	45	forward
GJB7-3309	3507688	3508179	45	forward
GJB7-3908	4162680	4162763	45	forward
GJB7-656	737422	737493	46	reverse
GJB7-664	740304	741056	46	reverse
GJB7-2132	2250946	2251413	46	reverse
GJB7-3017	3206685	3207383	46	reverse
GJB7-3023	3213855	3214487	46	reverse
GJB7-3324	3527194	3527883	46	reverse
GJB7-3851	4100377	4100616	46	reverse
GJB7-852	944768	945058	46	forward
GJB7-4162	4436182	4436721	46	forward
GJB7-174	207648	208331	47	reverse
GJB7-2069	2173385	2174263	47	reverse
GJB7-2427	2561776	2562828	47	reverse
GJB7-3189	3383264	3384697	47	reverse
GJB7-4540	4850254	4850943	47	reverse
GJB7-786	872144	872596	47	forward
GJB7-3306	3505054	3505779	47	forward
GJB7-1554	1668555	1670063	48	reverse
GJB7-2072	2176672	2177694	48	reverse
GJB7-2283	2416494	2416805	48	reverse
GJB7-2339	2477470	2478129	48	reverse
GJB7-3839	4086103	4087476	48	reverse
GJB7-189	223735	225924	48	forward
GJB7-708	793150	793287	48	forward
GJB7-1023	1129068	1129847	48	forward
GJB7-1054	1156476	1156838	48	forward
GJB7-2388	2529553	2529625	48	forward
GJB7-2404	2542302	2542559	48	forward
GJB7-3453	3637128	3637760	48	forward
GJB7-657	737540	737611	49	reverse
GJB7-952	1061307	1061567	49	reverse
GJB7-1219	1314570	1315088	49	reverse
GJB7-1741	1867812	1868471	49	reverse
GJB7-3097	3287419	3288138	49	reverse
GJB7-4421	4715683	4717335	49	reverse
GJB7-77	89473	90414	49	forward
GJB7-634	711712	712884	49	forward
GJB7-670	748945	750351	49	forward
GJB7-746	827806	829074	49	forward
GJB7-672	750782	752086	50	reverse
GJB7-1940	2055070	2055270	50	reverse
GJB7-2569	2744275	2744670	50	reverse
GJB7-3847	4096831	4097694	50	reverse
GJB7-1251	1349063	1350421	50	forward
GJB7-1273	1371625	1371822	50	forward
GJB7-1374	1471636	1471875	50	forward
GJB7-1685	1807912	1808370	50	forward
GJB7-2648	2817762	2818115	50	forward
GJB7-2392	2530110	2530994	51	reverse
GJB7-2949	3124343	3126577	51	reverse
GJB7-3797	4037841	4038578	51	reverse
GJB7-4182	4454362	4454679	51	reverse
GJB7-926	1029768	1031000	51	forward
GJB7-1130	1231415	1231936	51	forward
GJB7-1338	1443909	1444325	51	forward
GJB7-3394	3598943	3599890	51	forward
GJB7-3450	3635181	3635399	51	forward
GJB7-3566	3770894	3771943	51	forward
GJB7-4316	4607879	4609381	51	forward
GJB7-4534	4842914	4844236	51	forward
GJB7-734	818475	818547	52	forward
GJB7-1077	1182989	1183543	52	forward
GJB7-1759	1886101	1887069	52	forward
GJB7-1828	1955338	1956156	52	forward
GJB7-4402	4699954	4700769	52	forward
GJB7-71	81728	82513	53	reverse
GJB7-92	104473	105759	53	reverse
GJB7-1174	1278442	1279548	53	reverse
GJB7-2077	2183287	2184681	53	reverse
GJB7-2560	2732413	2734785	53	reverse
GJB7-3294	3496312	3497571	53	reverse
GJB7-3583	3792419	3793738	53	reverse
GJB7-2624	2789559	2790239	53	forward
GJB7-3533	3738922	3739683	53	forward
GJB7-2394	2531263	2532519	54	reverse
GJB7-2576	2748581	2749609	54	reverse
GJB7-2684	2860416	2860718	54	reverse
GJB7-1119	1217951	1218733	54	forward
GJB7-3723	3954412	3955035	54	forward
GJB7-1866	1993031	1993101	55	reverse
GJB7-2125	2244074	2244757	55	reverse
GJB7-2262	2394585	2395874	55	reverse
GJB7-2319	2456735	2457286	55	reverse
GJB7-4431	4726390	4727793	55	reverse
GJB7-232	276017	278158	55	forward
GJB7-2530	2697667	2699811	55	forward
GJB7-3894	4149733	4150779	55	forward
GJB7-413	473085	474059	56	reverse
GJB7-1290	1389063	1390349	56	reverse
GJB7-1489	1592913	1594988	56	reverse
GJB7-1868	1993381	1993929	56	reverse
GJB7-2318	2456124	2456678	56	reverse
GJB7-3009	3199036	3199797	56	reverse
GJB7-3473	3662601	3663689	56	reverse
GJB7-1664	1786152	1786895	56	forward
GJB7-1979	2084162	2086330	56	forward
GJB7-3224	3421718	3422419	56	forward
GJB7-73	84183	85454	57	reverse
GJB7-773	857515	857991	57	reverse
GJB7-1020	1126693	1127010	57	reverse
GJB7-1750	1875330	1876025	57	reverse
GJB7-2487	2645308	2646267	57	reverse
GJB7-2575	2748164	2748523	57	reverse
GJB7-2640	2809791	2810699	57	reverse
GJB7-3398	3603120	3603389	57	reverse
GJB7-3615	3837910	3839235	57	reverse
GJB7-4509	4822856	4823317	57	reverse
GJB7-247	289180	290723	57	forward
GJB7-312	362704	363948	57	forward
GJB7-341	391194	391418	57	forward
GJB7-706	790296	791129	57	forward
GJB7-853	945105	945763	57	forward
GJB7-1348	1449081	1450097	57	forward
GJB7-1761	1887926	1888786	57	forward
GJB7-1962	2073535	2074125	57	forward
GJB7-2031	2129155	2130369	57	forward
GJB7-2970	3152978	3153400	57	forward
GJB7-3906	4162453	4162526	57	forward
GJB7-3961	4217614	4219157	57	forward
GJB7-4103	4372578	4374121	57	forward
GJB7-4548	4859579	4861552	57	forward
GJB7-4555	4865700	4866926	57	forward
GJB7-1063	1163465	1163860	58	reverse
GJB7-1316	1419957	1420850	58	reverse
GJB7-1372	1469778	1470875	58	reverse
GJB7-1877	2001705	2002256	58	reverse
GJB7-2393	2531046	2531204	58	reverse
GJB7-3582	3791317	3792360	58	reverse
GJB7-512	583446	584807	58	forward
GJB7-1383	1479168	1479497	58	forward
GJB7-2410	2547526	2548245	58	forward
GJB7-2962	3142234	3143523	58	forward
GJB7-3497	3690218	3690901	58	forward
GJB7-4411	4706348	4706992	58	forward
GJB7-494	563503	564357	59	reverse
GJB7-666	742328	743482	59	reverse
GJB7-913	1011663	1013945	59	reverse
GJB7-1618	1738317	1738541	59	reverse
GJB7-3548	3752729	3753655	59	reverse
GJB7-3850	4099847	4100317	59	reverse
GJB7-3910	4163467	4164606	59	reverse
GJB7-697	780848	780979	59	forward
GJB7-1302	1406409	1406819	59	forward
GJB7-1385	1480339	1481613	59	forward
GJB7-2135	2254084	2254815	59	forward
GJB7-1639	1758368	1759483	60	reverse
GJB7-1946	2060954	2061304	60	reverse
GJB7-2209	2333080	2334321	60	reverse
GJB7-4397	4691770	4692936	60	reverse
GJB7-131	154363	155625	60	forward
GJB7-828	919266	920804	60	forward
GJB7-1581	1698618	1698917	60	forward
GJB7-332	383064	383825	61	reverse
GJB7-2420	2556338	2556913	61	reverse
GJB7-2562	2735120	2738482	61	reverse
GJB7-40	46190	47356	61	forward
GJB7-134	158203	158631	61	forward
GJB7-176	209289	209729	61	forward
GJB7-1084	1187770	1188225	61	forward
GJB7-1282	1379651	1380364	61	forward
GJB7-72	82567	84120	62	reverse
GJB7-2915	3088055	3089047	62	reverse
GJB7-3034	3224408	3225082	62	reverse
GJB7-3760	4001143	4002003	62	reverse
GJB7-981	1081772	1082170	62	forward
GJB7-3192	3389249	3389863	62	forward
GJB7-4039	4299356	4300396	62	forward
GJB7-1105	1206492	1207139	63	reverse
GJB7-1571	1687323	1688123	63	reverse
GJB7-2329	2464894	2466300	63	reverse
GJB7-2641	2810757	2811824	63	reverse
GJB7-3541	3746732	3747619	63	reverse
GJB7-3584	3793792	3794637	63	reverse
GJB7-3780	4022113	4023198	63	reverse
GJB7-4448	4745314	4746312	63	reverse
GJB7-195	233974	234726	63	forward
GJB7-584	660762	662867	63	forward
GJB7-3676	3909652	3910842	63	forward
GJB7-3932	4184103	4185950	63	forward
GJB7-447	511157	511852	64	reverse
GJB7-682	760924	761409	64	reverse
GJB7-3360	3563819	3564871	64	reverse
GJB7-27	30505	31209	64	forward
GJB7-727	813535	813963	64	forward
GJB7-1122	1220595	1221545	64	forward
GJB7-2665	2829917	2830708	64	forward
GJB7-2675	2838768	2850242	64	forward
GJB7-3482	3671706	3673838	64	forward
GJB7-1764	1890275	1891084	65	reverse
GJB7-2146	2265718	2266479	65	reverse
GJB7-2814	2992776	2992849	65	reverse
GJB7-2815	2992915	2992988	65	reverse
GJB7-3230	3429465	3430673	65	reverse
GJB7-509	579626	580504	65	forward
GJB7-2285	2417376	2418293	65	forward
GJB7-3931	4183291	4184037	65	forward
GJB7-556	631675	632661	66	reverse
GJB7-566	638851	639099	66	reverse
GJB7-4062	4319592	4320521	66	reverse
GJB7-277	318655	319140	66	forward
GJB7-964	1068076	1068873	66	forward
GJB7-4121	4385992	4386489	66	forward
GJB7-759	842153	843628	67	reverse
GJB7-1807	1932390	1932743	67	reverse
GJB7-2337	2475070	2476338	67	reverse
GJB7-2341	2478990	2480003	67	reverse
GJB7-2413	2549367	2550278	67	reverse
GJB7-2763	2935199	2935738	67	reverse
GJB7-3986	4246448	4247140	67	reverse
GJB7-635	712934	713887	67	forward
GJB7-707	791187	793082	67	forward
GJB7-1354	1454560	1455528	67	forward
GJB7-2651	2818847	2819185	67	forward
GJB7-3220	3418650	3419135	67	forward
GJB7-994	1097909	1098535	68	reverse
GJB7-1008	1114230	1114748	68	reverse
GJB7-1371	1469302	1469709	68	reverse
GJB7-2679	2855616	2855834	68	reverse
GJB7-2694	2867802	2868380	68	reverse
GJB7-3112	3301289	3303028	68	reverse
GJB7-1138	1237942	1238751	68	forward
GJB7-1203	1304382	1304975	68	forward
GJB7-1213	1310672	1310923	68	forward
GJB7-2654	2819701	2820222	68	forward
GJB7-2846	3022374	3022730	68	forward
GJB7-3964	4219674	4222671	68	forward
GJB7-470	537418	538353	69	reverse
GJB7-503	573174	574268	69	reverse
GJB7-1475	1576636	1578192	69	reverse
GJB7-2481	2620521	2622098	69	reverse
GJB7-3228	3425703	3427067	69	reverse
GJB7-3702	3935848	3936927	69	reverse
GJB7-3918	4172092	4172412	69	reverse
GJB7-390	450281	450970	69	forward
GJB7-2802	2979722	2980786	69	forward
GJB7-4027	4287977	4288597	69	forward
GJB7-1768	1894129	1894416	70	reverse
GJB7-2469	2607576	2608301	70	reverse
GJB7-2874	3049331	3050362	70	reverse
GJB7-4560	4872675	4873358	70	reverse
GJB7-383	441345	442022	70	forward
GJB7-917	1018042	1019130	70	forward
GJB7-4359	4650817	4651023	70	forward
GJB7-258	299914	301281	71	reverse
GJB7-843	936005	936763	71	reverse
GJB7-1749	1874677	1875258	71	reverse
GJB7-2056	2158646	2160076	71	reverse
GJB7-2400	2536717	2538732	71	reverse
GJB7-3077	3269629	3271542	71	reverse
GJB7-3165	3360020	3360886	71	reverse
GJB7-3432	3619784	3620968	71	reverse
GJB7-989	1088568	1089272	71	forward
GJB7-1047	1149495	1150286	71	forward
GJB7-1884	2008795	2009163	71	forward
GJB7-4332	4625156	4625464	71	forward
GJB7-1239	1337306	1337722	72	reverse
GJB7-2543	2716192	2717058	72	reverse
GJB7-3430	3618856	3619332	72	reverse
GJB7-1456	1558036	1559424	72	forward
GJB7-2623	2789067	2789486	72	forward
GJB7-3563	3768246	3768911	72	forward
GJB7-3591	3802026	3802925	72	forward
GJB7-4400	4697472	4698494	72	forward
GJB7-1102	1204337	1204582	73	reverse
GJB7-1913	2031897	2033327	73	reverse
GJB7-2632	2800374	2800446	73	reverse
GJB7-3162	3355171	3356583	73	reverse
GJB7-3404	3606452	3606784	73	reverse
GJB7-4489	4796855	4797556	73	reverse
GJB7-859	950938	951783	73	forward
GJB7-1091	1194087	1196630	73	forward
GJB7-1659	1782683	1783186	73	forward
GJB7-2202	2326636	2328396	73	forward
GJB7-3679	3912770	3913966	73	forward
GJB7-1599	1718053	1720035	74	reverse
GJB7-3770	4011866	4012456	74	reverse
GJB7-4425	4723095	4723541	74	reverse
GJB7-392	452744	454063	74	forward
GJB7-979	1080564	1080965	74	forward
GJB7-1720	1846323	1847171	74	forward
GJB7-2273	2406684	2408330	74	forward
GJB7-3738	3975383	3976000	74	forward
GJB7-642	721944	723623	75	reverse
GJB7-1404	1502253	1503182	75	reverse
GJB7-1615	1737327	1737641	75	reverse
GJB7-2236	2358478	2360121	75	reverse
GJB7-2937	3110201	3110935	75	reverse
GJB7-3132	3326777	3327829	75	reverse
GJB7-3384	3591790	3591862	75	reverse
GJB7-3506	3702885	3704102	75	reverse
GJB7-3510	3708621	3709451	75	reverse
GJB7-3762	4003543	4004901	75	reverse
GJB7-231	274178	275941	75	forward
GJB7-532	603618	604160	75	forward
GJB7-2365	2502523	2503464	75	forward
GJB7-2827	3002801	3003580	75	forward
GJB7-3869	4121449	4122990	75	forward
GJB7-4147	4416018	4417559	75	forward
GJB7-1395	1491200	1491781	76	reverse
GJB7-2305	2441710	2443536	76	reverse
GJB7-2532	2701376	2701714	76	reverse
GJB7-2810	2989511	2991067	76	reverse
GJB7-4426	4723616	4724002	76	reverse
GJB7-1280	1378047	1378796	76	forward
GJB7-2309	2445655	2446857	76	forward
GJB7-2658	2824931	2825620	76	forward
GJB7-3968	4224288	4224557	76	forward
GJB7-4123	4387239	4391267	76	forward
GJB7-1740	1867273	1867734	77	reverse
GJB7-1989	2094011	2094940	77	reverse
GJB7-2952	3130782	3131924	77	reverse
GJB7-3682	3915432	3916253	77	reverse
GJB7-256	298231	299010	77	forward
GJB7-347	400346	400810	77	forward
GJB7-958	1064901	1065212	77	forward
GJB7-1778	1903426	1906065	77	forward
GJB7-4415	4710040	4711953	77	forward
GJB7-5	5114	5887	78	reverse
GJB7-1205	1306147	1306395	78	reverse
GJB7-1535	1650489	1652453	78	reverse
GJB7-1880	2003942	2005147	78	reverse
GJB7-3716	3947273	3947914	78	reverse
GJB7-410	471013	471432	78	forward
GJB7-505	575491	575973	78	forward
GJB7-511	581913	583367	78	forward
GJB7-2176	2299247	2300296	78	forward
GJB7-3081	3274081	3275436	78	forward
GJB7-2301	2437609	2437761	79	reverse
GJB7-3028	3218145	3218215	79	reverse
GJB7-1132	1232295	1233374	79	forward
GJB7-1375	1471926	1472822	79	forward
GJB7-4050	4309589	4310464	79	forward
GJB7-1169	1272877	1273998	80	reverse
GJB7-1173	1277714	1278361	80	reverse
GJB7-1227	1325211	1325465	80	reverse
GJB7-2179	2303002	2303859	80	reverse
GJB7-2238	2360850	2361911	80	reverse
GJB7-2315	2454050	2454322	80	reverse
GJB7-4369	4657714	4658679	80	reverse
GJB7-2766	2938953	2940068	80	forward
GJB7-3559	3763059	3763685	80	forward
GJB7-3936	4188437	4189237	80	forward
GJB7-1093	1196932	1197306	81	reverse
GJB7-2062	2166340	2167632	81	reverse
GJB7-1	169	255	81	forward
GJB7-201	238657	240078	81	forward
GJB7-4106	4374622	4377622	81	forward
GJB7-1312	1415909	1416148	82	reverse
GJB7-2307	2444283	2444777	82	reverse
GJB7-2943	3118827	3120125	82	reverse
GJB7-1250	1348660	1348980	82	forward
GJB7-2247	2377254	2377949	82	forward
GJB7-2529	2696253	2697584	82	forward
GJB7-3373	3578064	3578948	82	forward
GJB7-4331	4624123	4625073	82	forward
GJB7-559	634661	635335	83	reverse
GJB7-1503	1611987	1613114	83	forward
GJB7-4268	4563690	4565045	83	forward
GJB7-4544	4853804	4854772	83	forward
GJB7-1932	2048956	2050884	84	reverse
GJB7-2821	2997430	2998491	84	reverse
GJB7-3141	3334655	3334942	84	reverse
GJB7-3289	3492823	3493833	84	reverse
GJB7-3622	3847981	3848679	84	reverse
GJB7-3807	4050526	4051863	84	reverse
GJB7-506	576052	576870	84	forward
GJB7-954	1062352	1062726	84	forward
GJB7-1075	1181205	1182143	84	forward
GJB7-1977	2082737	2083009	84	forward
GJB7-4345	4638946	4640109	84	forward
GJB7-486	555572	556366	85	reverse
GJB7-2281	2413342	2415012	85	reverse
GJB7-3455	3639939	3641156	85	reverse
GJB7-4001	4261530	4261841	85	reverse
GJB7-4347	4641861	4642181	85	reverse
GJB7-12	11593	13509	85	forward
GJB7-193	230653	231213	85	forward
GJB7-366	424651	427587	85	forward
GJB7-1136	1236255	1236491	85	forward
GJB7-2669	2833488	2834366	85	forward
GJB7-3372	3577682	3577978	85	forward
GJB7-3952	4205143	4206621	85	forward
GJB7-1025	1130174	1130503	86	reverse
GJB7-2089	2195687	2196529	86	reverse
GJB7-2298	2434204	2436006	86	reverse
GJB7-3685	3917861	3918112	86	reverse
GJB7-3835	4082051	4082824	86	reverse
GJB7-4483	4791267	4792538	86	reverse
GJB7-125	147403	148719	86	forward
GJB7-1634	1755466	1755678	86	forward
GJB7-112	132170	133741	87	reverse
GJB7-2470	2608372	2609661	87	reverse
GJB7-4044	4302044	4303636	87	reverse
GJB7-856	947645	948757	87	forward
GJB7-1382	1477959	1479080	87	forward
GJB7-4212	4483854	4485164	87	forward
GJB7-433	494071	494586	88	reverse
GJB7-1396	1491858	1492298	88	reverse
GJB7-2489	2648863	2649084	88	reverse
GJB7-80	92181	93521	88	forward
GJB7-311	362157	362615	88	forward
GJB7-408	469330	470433	88	forward
GJB7-1252	1350472	1350819	88	forward
GJB7-1631	1749977	1751110	88	forward
GJB7-1633	1753395	1755377	88	forward
GJB7-3211	3410930	3411622	88	forward
GJB7-4201	4472172	4473281	88	forward
GJB7-1288	1387043	1388683	89	reverse
GJB7-1820	1946622	1947551	89	reverse
GJB7-3856	4105477	4105920	89	reverse
GJB7-4429	4725524	4725625	89	reverse
GJB7-1086	1188744	1189064	89	forward
GJB7-1658	1782411	1782593	89	forward
GJB7-1683	1805792	1806805	90	reverse
GJB7-2095	2204602	2205183	90	reverse
GJB7-2331	2467469	2468890	90	reverse
GJB7-3618	3841737	3841810	90	reverse
GJB7-975	1077233	1079314	90	forward
GJB7-1976	2082173	2082646	90	forward
GJB7-4338	4631644	4634082	90	forward
GJB7-910	1009255	1010079	91	reverse
GJB7-1112	1213188	1213481	91	reverse
GJB7-1914	2033401	2034096	91	reverse
GJB7-2601	2766788	2767693	91	reverse
GJB7-4064	4321929	4322459	91	reverse
GJB7-4319	4613159	4614127	91	reverse
GJB7-18	17867	19966	91	forward
GJB7-377	437203	437523	91	forward
GJB7-1278	1376424	1377404	91	forward
GJB7-1507	1616060	1617448	91	forward
GJB7-3567	3771995	3772573	91	forward
GJB7-4526	4833702	4834379	91	forward
GJB7-4061	4319014	4319499	92	reverse
GJB7-4511	4824115	4824654	92	reverse
GJB7-636	713955	715883	92	forward
GJB7-769	852315	853256	92	forward
GJB7-3335	3536834	3538201	92	forward
GJB7-1247	1345970	1346878	93	reverse
GJB7-1806	1931637	1932296	93	reverse
GJB7-2703	2871131	2871595	93	reverse
GJB7-3056	3247469	3248215	93	reverse
GJB7-3315	3511909	3514245	93	reverse
GJB7-3514	3712162	3713721	93	reverse
GJB7-4065	4322551	4323525	93	reverse
GJB7-704	787521	788231	93	forward
GJB7-1341	1445606	1446295	93	forward
GJB7-2303	2439711	2440925	93	forward
GJB7-178	211027	211407	94	reverse
GJB7-1017	1124846	1125304	94	reverse
GJB7-2419	2555344	2556243	94	reverse
GJB7-3194	3391272	3392096	94	reverse
GJB7-3442	3627797	3628387	94	reverse
GJB7-4498	4807850	4808053	94	reverse
GJB7-1495	1602034	1602249	94	forward
GJB7-3082	3275515	3276012	94	forward
GJB7-873	963051	964064	95	reverse
GJB7-1232	1328651	1329667	95	reverse
GJB7-3434	3623251	3623721	95	reverse
GJB7-4270	4566657	4568303	95	reverse
GJB7-355	410679	410903	95	forward
GJB7-510	580570	581817	95	forward
GJB7-1272	1371095	1371529	95	forward
GJB7-3943	4197310	4198740	95	forward
GJB7-562	636516	637169	96	reverse
GJB7-1263	1361556	1361846	96	reverse
GJB7-3433	3621040	3623154	96	reverse
GJB7-3854	4102483	4103112	96	reverse
GJB7-4056	4313815	4314561	96	reverse
GJB7-854	945821	946723	96	forward
GJB7-1224	1322078	1323274	96	forward
GJB7-1729	1855651	1856565	96	forward
GJB7-4394	4688489	4689499	96	forward
GJB7-4455	4752546	4756061	96	forward
GJB7-674	753263	754666	97	reverse
GJB7-1775	1900770	1901456	97	reverse
GJB7-2276	2409034	2409291	97	reverse
GJB7-2349	2485584	2486240	97	reverse
GJB7-3232	3432091	3433080	97	reverse
GJB7-3234	3435915	3437060	97	reverse
GJB7-3472	3661226	3662503	97	reverse
GJB7-3709	3942445	3943254	97	reverse
GJB7-4043	4301680	4301946	97	reverse
GJB7-4164	4437634	4437906	97	reverse
GJB7-1323	1429936	1430574	97	forward
GJB7-4040	4300459	4301181	97	forward
GJB7-34	37103	38674	98	reverse
GJB7-1431	1531272	1533707	98	reverse
GJB7-1597	1716546	1717103	98	reverse
GJB7-3665	3894008	3895399	98	reverse
GJB7-36	40131	41624	98	forward
GJB7-984	1085560	1085892	98	forward
GJB7-2796	2974158	2974334	98	forward
GJB7-4085	4349833	4350153	98	forward
GJB7-4246	4537151	4537297	98	forward
GJB7-4405	4702409	4703761	98	forward
GJB7-619	696776	697417	99	reverse
GJB7-2786	2967727	2968176	99	reverse
GJB7-3642	3866228	3867682	99	reverse
GJB7-270	311185	313824	99	forward
GJB7-336	386594	388168	99	forward
GJB7-1370	1468554	1469201	100	reverse
GJB7-1650	1772657	1773532	100	reverse
GJB7-2282	2415098	2416393	100	reverse
GJB7-2437	2572528	2572827	100	reverse
GJB7-2506	2672948	2673733	100	reverse
GJB7-21	24469	25011	100	forward
GJB7-132	155686	156837	100	forward
GJB7-508	578749	579525	100	forward
GJB7-1972	2080066	2080863	100	forward
GJB7-2968	3149682	3151457	100	forward
GJB7-3366	3571515	3571985	100	forward
GJB7-4035	4294934	4295923	100	forward
GJB7-1671	1791592	1792374	101	reverse
GJB7-3059	3250231	3251310	101	reverse
GJB7-2117	2235255	2236259	101	forward
GJB7-3490	3682073	3682546	101	forward
GJB7-4154	4424961	4426265	101	forward
GJB7-4501	4812650	4815415	101	forward
GJB7-1400	1496053	1497561	102	reverse
GJB7-1825	1952123	1952575	102	reverse
GJB7-4368	4656949	4657611	102	reverse
GJB7-2045	2147330	2148229	102	forward
GJB7-3905	4160965	4162350	102	forward
GJB7-889	983478	983879	103	reverse
GJB7-2628	2794788	2796089	103	reverse
GJB7-3283	3486106	3488040	103	reverse
GJB7-3788	4030691	4031125	103	reverse
GJB7-445	510175	510549	103	forward
GJB7-3348	3550283	3550546	103	forward
GJB7-1103	1204656	1205702	104	reverse
GJB7-1387	1482592	1483197	104	reverse
GJB7-4350	4643526	4644281	104	reverse
GJB7-1896	2019309	2020526	104	forward
GJB7-3580	3788971	3789813	104	forward
GJB7-224	265401	266426	105	forward
GJB7-1511	1623513	1624193	105	forward
GJB7-3105	3296036	3296743	105	forward
GJB7-3154	3344840	3346003	105	forward
GJB7-3755	3996858	3997151	105	forward
GJB7-164	195012	195872	106	reverse
GJB7-1262	1360589	1361449	106	reverse
GJB7-3776	4017229	4018917	106	reverse
GJB7-4439	4734974	4735462	106	reverse
GJB7-2189	2312272	2313828	106	forward
GJB7-3168	3362158	3363507	106	forward
GJB7-3898	4154324	4154548	106	forward
GJB7-3400	3603883	3604251	107	reverse
GJB7-294	341687	342199	107	forward
GJB7-1802	1927622	1927852	107	forward
GJB7-2012	2114561	2114845	107	forward
GJB7-3714	3946036	3946491	107	forward
GJB7-3914	4167912	4170458	107	forward
GJB7-4306	4600776	4600952	107	forward
GJB7-70	81023	81619	108	reverse
GJB7-303	351199	351966	108	reverse
GJB7-620	697517	697780	108	reverse
GJB7-1034	1136741	1136851	108	reverse
GJB7-2148	2268440	2269378	108	reverse
GJB7-3327	3530564	3531355	108	reverse
GJB7-3458	3642429	3642596	108	reverse
GJB7-3504	3701493	3701753	108	reverse
GJB7-1201	1302693	1303340	108	forward
GJB7-1736	1865367	1865897	108	forward
GJB7-3367	3572086	3573345	108	forward
GJB7-4207	4480063	4480431	108	forward
GJB7-601	679477	680283	109	reverse
GJB7-2979	3160305	3161111	109	reverse
GJB7-3267	3468958	3469842	109	reverse
GJB7-3594	3805739	3807799	109	reverse
GJB7-319	369393	370107	109	forward
GJB7-2767	2940149	2943802	109	forward
GJB7-240	282458	284176	110	reverse
GJB7-739	821273	822211	110	reverse
GJB7-1405	1503258	1504559	110	reverse
GJB7-1602	1723821	1724075	110	reverse
GJB7-2078	2184735	2186105	110	reverse
GJB7-2493	2652587	2653861	110	reverse
GJB7-3164	3357651	3359909	110	reverse
GJB7-7	7665	8618	110	forward
GJB7-476	542698	543303	110	forward
GJB7-690	773872	774078	110	forward
GJB7-1578	1696882	1697871	110	forward
GJB7-1780	1907697	1907936	110	forward
GJB7-2963	3143582	3144949	110	forward
GJB7-3125	3316831	3318015	110	forward
GJB7-3248	3451020	3452063	110	forward
GJB7-2595	2763714	2763905	111	reverse
GJB7-4057	4314658	4315668	111	reverse
GJB7-4310	4602415	4602948	111	reverse
GJB7-4432	4727849	4728853	111	reverse
GJB7-1271	1369055	1370983	111	forward
GJB7-1620	1739440	1740420	111	forward
GJB7-4247	4537396	4538832	111	forward
GJB7-1100	1202562	1203680	112	reverse
GJB7-3007	3196444	3197151	112	reverse
GJB7-4053	4311703	4312470	112	reverse
GJB7-248	290781	290854	112	forward
GJB7-2249	2379116	2381401	112	forward
GJB7-2744	2911390	2911674	112	forward
GJB7-2960	3139344	3140192	112	forward
GJB7-3101	3290468	3290743	112	forward
GJB7-3363	3568431	3569405	112	forward
GJB7-898	989885	991651	113	reverse
GJB7-1079	1184165	1184911	113	reverse
GJB7-3488	3679779	3681014	113	reverse
GJB7-473	539730	540281	113	forward
GJB7-920	1021561	1022244	113	forward
GJB7-2378	2519936	2520934	113	forward
GJB7-675	754764	755690	114	reverse
GJB7-1528	1643687	1645132	114	reverse
GJB7-2239	2361992	2363044	114	reverse
GJB7-2265	2398181	2399377	114	reverse
GJB7-1200	1302505	1302578	114	forward
GJB7-1779	1906143	1907582	114	forward
GJB7-2625	2790293	2792953	114	forward
GJB7-3814	4057946	4059139	114	forward
GJB7-3962	4219215	4219288	114	forward
GJB7-4104	4374179	4374252	114	forward
GJB7-795	878868	879974	115	reverse
GJB7-1454	1555755	1556945	115	reverse
GJB7-2229	2352011	2352460	115	reverse
GJB7-3325	3527930	3529420	115	reverse
GJB7-4292	4587163	4587235	115	reverse
GJB7-316	366908	368158	115	forward
GJB7-2108	2225173	2227284	115	forward
GJB7-462	526302	526772	116	reverse
GJB7-644	724969	725904	116	reverse
GJB7-1570	1686676	1687206	116	reverse
GJB7-1815	1941560	1942531	116	reverse
GJB7-1945	2060334	2060837	116	reverse
GJB7-1981	2088651	2088905	116	reverse
GJB7-2593	2762857	2763105	116	reverse
GJB7-2686	2861298	2862470	116	reverse
GJB7-2820	2996813	2997313	116	reverse
GJB7-3648	3875334	3875807	116	reverse
GJB7-299	348088	349035	116	forward
GJB7-352	408034	408135	116	forward
GJB7-1712	1837970	1838554	116	forward
GJB7-3319	3522035	3523138	116	forward
GJB7-523	596604	597113	117	reverse
GJB7-2243	2368463	2371309	117	reverse
GJB7-3190	3384745	3387588	117	reverse
GJB7-1234	1331793	1332344	117	forward
GJB7-1629	1748572	1748871	117	forward
GJB7-3308	3507283	3507570	117	forward
GJB7-4094	4361963	4362739	117	forward
GJB7-242	284991	285395	118	reverse
GJB7-806	891662	893884	118	reverse
GJB7-1215	1311289	1311636	118	reverse
GJB7-2034	2131943	2133001	118	reverse
GJB7-2490	2649173	2650645	118	reverse
GJB7-3889	4143372	4144853	118	reverse
GJB7-4478	4785649	4786557	118	reverse
GJB7-103	121643	122488	118	forward
GJB7-127	149960	151027	118	forward
GJB7-468	533242	533895	118	forward
GJB7-749	831173	832474	118	forward
GJB7-4115	4381743	4381815	118	forward
GJB7-2433	2567740	2568966	119	reverse
GJB7-2486	2639591	2645188	119	reverse
GJB7-3021	3209943	3212432	119	reverse
GJB7-3345	3547347	3547976	119	reverse
GJB7-4258	4550896	4551339	119	reverse
GJB7-4113	4381461	4381542	119	forward
GJB7-180	212482	213273	120	reverse
GJB7-2497	2657786	2658217	120	reverse
GJB7-4295	4589642	4589989	120	reverse
GJB7-4418	4712551	4713015	120	reverse
GJB7-4517	4828720	4829508	120	reverse
GJB7-2666	2830773	2832014	120	forward
GJB7-3730	3962566	3963957	120	forward
GJB7-1675	1795419	1796339	121	reverse
GJB7-2111	2230294	2230710	121	reverse
GJB7-3791	4032286	4033512	121	reverse
GJB7-1210	1309035	1309676	121	forward
GJB7-1437	1538654	1538980	121	forward
GJB7-1221	1317272	1318558	122	reverse
GJB7-3011	3201120	3202298	122	reverse
GJB7-222	262375	264789	122	forward
GJB7-361	417463	418350	122	forward
GJB7-1171	1275542	1276216	123	reverse
GJB7-2036	2133740	2134912	123	reverse
GJB7-3529	3734614	3735309	123	reverse
GJB7-728	814028	815251	123	forward
GJB7-1137	1236577	1237818	123	forward
GJB7-1813	1939052	1939921	123	forward
GJB7-3146	3338755	3339159	123	forward
GJB7-3221	3419203	3420189	123	forward
GJB7-4533	4841993	4842790	123	forward
GJB7-4545	4854856	4856238	123	forward
GJB7-1104	1205807	1206367	124	reverse
GJB7-2449	2583637	2584680	124	reverse
GJB7-1253	1350908	1351672	124	forward
GJB7-2197	2322264	2324024	124	forward
GJB7-179	211502	212356	125	reverse
GJB7-3047	3237857	3239059	125	reverse
GJB7-3435	3623817	3624191	125	reverse
GJB7-3544	3749623	3749850	125	reverse
GJB7-1421	1521955	1523175	125	forward
GJB7-2321	2458129	2458776	125	forward
GJB7-949	1057823	1060708	126	reverse
GJB7-1367	1466265	1466846	126	reverse
GJB7-1919	2038731	2039150	126	reverse
GJB7-4016	4275245	4276393	126	reverse
GJB7-14	15014	15961	126	forward
GJB7-38	42932	44185	126	forward
GJB7-1384	1479556	1480212	126	forward
GJB7-2805	2983697	2984227	126	forward
GJB7-529	601303	601848	127	reverse
GJB7-2448	2583279	2583509	127	reverse
GJB7-1420	1520928	1521827	127	forward
GJB7-1491	1597570	1599354	128	reverse
GJB7-2501	2660629	2663034	128	reverse
GJB7-615	693144	693932	128	forward
GJB7-702	785485	786618	128	forward
GJB7-2425	2559841	2560170	128	forward
GJB7-4209	4481327	4482652	128	forward
GJB7-4219	4491975	4492688	128	forward
GJB7-1442	1544840	1545526	129	reverse
GJB7-1879	2003303	2003812	129	reverse
GJB7-2634	2802529	2805102	129	reverse
GJB7-2752	2917473	2918315	129	reverse
GJB7-3528	3733489	3734484	129	reverse
GJB7-206	242841	244358	129	forward
GJB7-2783	2964173	2965456	129	forward
GJB7-3823	4067739	4069385	129	forward
GJB7-2459	2598826	2599689	130	reverse
GJB7-1085	1188287	1188613	130	forward
GJB7-1183	1287685	1287897	131	reverse
GJB7-3088	3279831	3280517	131	reverse
GJB7-4199	4468944	4470488	131	reverse
GJB7-4223	4493918	4494373	131	reverse
GJB7-321	370836	372119	131	forward
GJB7-1546	1661385	1662191	131	forward
GJB7-2154	2274598	2275506	131	forward
GJB7-4339	4634173	4634904	131	forward
GJB7-2076	2181676	2183154	132	reverse
GJB7-2774	2953789	2954802	132	reverse
GJB7-3095	3285044	3286051	132	reverse
GJB7-1057	1159383	1159889	132	forward
GJB7-1789	1917075	1917989	132	forward
GJB7-678	757232	757513	133	reverse
GJB7-2163	2282680	2284200	133	reverse
GJB7-4263	4555676	4557319	133	reverse
GJB7-262	303393	304124	133	forward
GJB7-1131	1231988	1232161	133	forward
GJB7-3865	4115898	4116788	133	forward
GJB7-54	61794	63413	134	reverse
GJB7-3326	3529536	3530429	134	reverse
GJB7-732	818189	818261	134	forward
GJB7-900	993279	993773	134	forward
GJB7-1423	1523952	1525241	135	reverse
GJB7-1529	1645247	1646671	135	reverse
GJB7-1746	1870875	1872002	135	reverse
GJB7-2942	3118020	3118691	135	reverse
GJB7-3837	4083801	4084760	135	reverse
GJB7-3924	4176234	4176950	135	forward
GJB7-1258	1356928	1358319	136	reverse
GJB7-4443	4740451	4740894	136	reverse
GJB7-723	811678	811791	136	forward
GJB7-1061	1162526	1162693	136	forward
GJB7-1567	1682912	1683592	136	forward
GJB7-1963	2074183	2075010	136	forward
GJB7-1259	1358456	1359055	137	reverse
GJB7-2877	3053474	3053971	137	reverse
GJB7-4422	4717385	4718802	137	reverse
GJB7-4458	4759355	4761817	137	reverse
GJB7-735	818600	818672	137	forward
GJB7-1756	1880944	1882308	137	forward
GJB7-655	736708	737283	138	reverse
GJB7-3527	3732817	3733350	138	reverse
GJB7-3638	3863164	3864075	138	reverse
GJB7-3652	3878452	3879384	138	forward
GJB7-621	697889	699100	139	reverse
GJB7-4264	4557453	4558790	139	reverse
GJB7-901	993908	997993	139	forward
GJB7-3151	3341698	3342885	139	forward
GJB7-3942	4196409	4197170	139	forward
GJB7-100	117244	117939	140	reverse
GJB7-182	213870	215288	140	reverse
GJB7-1298	1399804	1401015	140	reverse
GJB7-1986	2091879	2091951	140	reverse
GJB7-187	218305	220779	140	forward
GJB7-217	257144	257701	140	forward
GJB7-718	803972	805180	141	forward
GJB7-1735	1863681	1865225	141	forward
GJB7-3013	3203361	3203843	141	forward
GJB7-3396	3601253	3602629	141	forward
GJB7-1492	1599483	1600268	142	reverse
GJB7-1574	1692892	1693341	142	reverse
GJB7-1614	1735781	1737184	142	reverse
GJB7-2053	2154547	2155530	142	reverse
GJB7-3767	4007492	4008883	142	reverse
GJB7-4017	4276520	4277347	142	reverse
GJB7-276	318129	318512	142	forward
GJB7-918	1019201	1020484	142	forward
GJB7-1045	1148158	1148538	142	forward
GJB7-1483	1584297	1584629	142	forward
GJB7-4196	4465224	4467320	142	forward
GJB7-808	894722	895381	143	reverse
GJB7-878	969500	971152	143	reverse
GJB7-3018	3207430	3207942	143	reverse
GJB7-3076	3268754	3269485	143	reverse
GJB7-233	278214	278603	143	forward
GJB7-339	389874	390398	143	forward
GJB7-1486	1588983	1589990	143	forward
GJB7-1516	1629072	1629293	144	reverse
GJB7-3355	3555770	3557215	144	reverse
GJB7-215	255276	256127	144	forward
GJB7-1202	1303449	1304237	144	forward
GJB7-2517	2682152	2682955	144	forward
GJB7-3216	3416565	3416948	144	forward
GJB7-3219	3418206	3418505	144	forward
GJB7-1587	1707001	1707984	145	reverse
GJB7-2834	3010313	3012553	145	reverse
GJB7-2844	3020949	3021557	145	reverse
GJB7-3751	3991828	3992577	145	reverse
GJB7-356	410999	412003	145	forward
GJB7-1876	2000758	2001558	146	reverse
GJB7-3281	3484442	3485290	146	reverse
GJB7-3405	3606858	3607214	146	reverse
GJB7-4271	4568399	4569739	146	reverse
GJB7-79	91747	92034	146	forward
GJB7-216	256272	256997	146	forward
GJB7-787	872644	873348	146	forward
GJB7-1155	1253924	1254889	147	reverse
GJB7-1612	1733034	1734575	147	reverse
GJB7-3817	4062612	4063685	147	reverse
GJB7-401	463675	464646	147	forward
GJB7-4032	4292033	4292533	147	forward
GJB7-4363	4652084	4652533	147	forward
GJB7-890	983983	984067	148	reverse
GJB7-1191	1294301	1294831	148	reverse
GJB7-3295	3497625	3497918	148	reverse
GJB7-1709	1834614	1835561	148	forward
GJB7-2670	2834452	2836113	148	forward
GJB7-9	9376	9942	149	reverse
GJB7-1640	1759544	1759852	149	reverse
GJB7-2165	2285831	2286853	149	reverse
GJB7-2338	2476406	2477320	149	reverse
GJB7-2809	2988846	2989361	149	reverse
GJB7-3698	3932121	3932930	149	reverse
GJB7-444	508154	510025	149	forward
GJB7-3199	3395211	3396956	149	forward
GJB7-4238	4527438	4528787	149	forward
GJB7-3269	3472329	3472598	150	reverse
GJB7-4516	4828111	4828569	150	reverse
GJB7-1591	1711227	1711979	150	forward
GJB7-3374	3579031	3579195	150	forward
GJB7-1360	1458589	1458662	151	reverse
GJB7-1867	1993157	1993229	151	reverse
GJB7-4257	4550310	4550744	151	reverse
GJB7-135	158693	161398	151	forward
GJB7-1188	1291945	1292217	151	forward
GJB7-2603	2768366	2768833	151	forward
GJB7-3210	3410332	3410778	151	forward
GJB7-1406	1504670	1506376	152	reverse
GJB7-2035	2133120	2133587	152	reverse
GJB7-207	244488	245915	152	forward
GJB7-255	296903	298078	152	forward
GJB7-4020	4280503	4281339	152	forward
GJB7-487	556452	557279	153	reverse
GJB7-1295	1394721	1396316	153	reverse
GJB7-1432	1533806	1536247	153	reverse
GJB7-1843	1971303	1972169	153	reverse
GJB7-1875	1999618	2000604	153	reverse
GJB7-2156	2276033	2276728	153	forward
GJB7-495	564417	565187	154	reverse
GJB7-1094	1197388	1198602	154	reverse
GJB7-1794	1921044	1921925	154	reverse
GJB7-4066	4323619	4324644	154	reverse
GJB7-48	56689	57189	154	forward
GJB7-1310	1414270	1414686	154	forward
GJB7-1285	1382251	1383297	155	reverse
GJB7-1538	1654391	1655059	155	reverse
GJB7-3340	3543257	3543511	155	reverse
GJB7-3507	3704178	3704291	155	reverse
GJB7-921	1022358	1024031	155	forward
GJB7-1126	1228273	1229232	155	forward
GJB7-1135	1235365	1236099	155	forward
GJB7-1284	1381903	1382094	156	reverse
GJB7-2480	2620008	2620364	156	reverse
GJB7-3613	3834571	3835590	156	reverse
GJB7-3985	4245443	4246291	156	reverse
GJB7-548	619816	621141	156	forward
GJB7-3334	3536273	3536677	156	forward
GJB7-650	731141	732019	157	reverse
GJB7-876	966644	968362	157	reverse
GJB7-1935	2051648	2053144	157	reverse
GJB7-2417	2553141	2554157	157	reverse
GJB7-3598	3811595	3812881	157	reverse
GJB7-4492	4799595	4801184	157	reverse
GJB7-3829	4076544	4077503	157	forward
GJB7-4118	4383733	4384278	157	forward
GJB7-57	66654	66893	158	reverse
GJB7-1686	1808421	1809263	158	forward
GJB7-647	727420	728160	159	reverse
GJB7-2515	2680648	2681142	159	reverse
GJB7-2712	2879425	2880480	159	reverse
GJB7-4186	4456866	4457321	159	reverse
GJB7-150	175320	176084	159	forward
GJB7-1167	1269559	1270788	159	forward
GJB7-4323	4617001	4617073	159	forward
GJB7-4324	4617233	4617305	159	forward
GJB7-2857	3032477	3033382	160	reverse
GJB7-4089	4353735	4354586	160	reverse
GJB7-4449	4746376	4747596	160	reverse
GJB7-1665	1786952	1787491	160	forward
GJB7-3880	4132442	4133371	160	forward
GJB7-4401	4698567	4699793	160	forward
GJB7-540	611721	612032	161	reverse
GJB7-393	454138	455508	161	forward
GJB7-677	756539	757069	162	reverse
GJB7-3044	3232857	3235730	162	reverse
GJB7-39	44312	46027	162	forward
GJB7-3446	3631315	3633222	162	forward
GJB7-148	171814	173220	163	reverse
GJB7-2055	2157076	2158482	163	reverse
GJB7-3040	3228734	3229393	163	reverse
GJB7-3417	3612521	3612892	163	reverse
GJB7-4173	4445212	4445571	163	reverse
GJB7-2402	2540022	2540783	163	forward
GJB7-4202	4473370	4474728	163	forward
GJB7-1908	2027311	2029023	164	reverse
GJB7-2948	3123903	3124178	164	reverse
GJB7-4539	4849469	4850089	164	reverse
GJB7-731	817236	818024	164	forward
GJB7-2803	2980856	2981851	164	forward
GJB7-4078	4339966	4340856	164	forward
GJB7-589	666130	667365	165	reverse
GJB7-652	732647	733732	165	reverse
GJB7-2485	2632119	2639425	165	reverse
GJB7-999	1103256	1104293	165	forward
GJB7-2755	2923005	2923880	165	forward
GJB7-3699	3933080	3933634	166	reverse
GJB7-3838	4084896	4085936	166	reverse
GJB7-554	626681	628651	166	forward
GJB7-761	844511	844762	166	forward
GJB7-1975	2081934	2082006	166	forward
GJB7-4225	4497295	4497411	166	forward
GJB7-252	294819	294892	167	forward
GJB7-1402	1499039	1500685	167	forward
GJB7-1621	1740532	1742181	167	forward
GJB7-1557	1672732	1674357	168	reverse
GJB7-2215	2338601	2340967	168	reverse
GJB7-374	434201	434914	168	forward
GJB7-2346	2484214	2484462	168	forward
GJB7-403	465185	465877	169	forward
GJB7-2998	3185720	3186433	169	forward
GJB7-758	841074	841982	170	reverse
GJB7-888	982624	983307	170	reverse
GJB7-1480	1582858	1583247	170	reverse
GJB7-3207	3405500	3406789	170	forward
GJB7-3350	3550976	3551248	171	reverse
GJB7-2130	2249729	2250187	171	forward
GJB7-387	444382	445554	172	reverse
GJB7-1035	1136960	1138429	172	reverse
GJB7-1325	1430980	1431939	172	reverse
GJB7-919	1020627	1021388	172	forward
GJB7-1268	1365402	1366238	172	forward
GJB7-96	110005	112911	173	reverse
GJB7-965	1068940	1069257	173	forward
GJB7-3646	3871846	3873873	173	forward
GJB7-2460	2599820	2600533	174	reverse
GJB7-3641	3865700	3866053	174	reverse
GJB7-2916	3089110	3090243	175	reverse
GJB7-3382	3588288	3588409	175	reverse
GJB7-3585	3794701	3795678	175	reverse
GJB7-184	216394	216849	176	reverse
GJB7-1474	1575173	1576459	176	reverse
GJB7-1496	1602344	1602487	176	forward
GJB7-2157	2276882	2277766	176	forward
GJB7-107	125690	126673	177	reverse
GJB7-2361	2497968	2499278	177	reverse
GJB7-2987	3171108	3173996	177	reverse
GJB7-3519	3719301	3720056	177	reverse
GJB7-3635	3859524	3859811	177	reverse
GJB7-3261	3461982	3462860	177	forward
GJB7-4107	4377704	4377825	177	forward
GJB7-463	526889	527440	178	reverse
GJB7-1326	1432112	1432840	178	reverse
GJB7-3266	3466890	3468779	178	reverse
GJB7-1151	1250596	1251900	178	forward
GJB7-4208	4480540	4481148	178	forward
GJB7-2344	2482309	2483487	179	reverse
GJB7-64	72947	73840	179	forward
GJB7-230	273039	273998	179	forward
GJB7-1441	1544456	1544659	180	reverse
GJB7-2140	2257791	2258708	180	reverse
GJB7-2514	2679253	2680467	180	reverse
GJB7-3471	3660209	3661045	180	reverse
GJB7-998	1100463	1103075	180	forward
GJB7-4203	4474892	4475809	180	forward
GJB7-4399	4695342	4697291	180	forward
GJB7-4485	4794345	4794860	180	forward
GJB7-1848	1977691	1978521	181	reverse
GJB7-3578	3785265	3787307	181	reverse
GJB7-583	660167	660580	181	forward
GJB7-2518	2683100	2683978	181	forward
GJB7-2527	2692976	2694166	181	forward
GJB7-2997	3184843	3185538	181	forward
GJB7-3871	4123349	4126337	181	forward
GJB7-2325	2461338	2462024	182	reverse
GJB7-4376	4664256	4665599	182	reverse
GJB7-250	291235	294327	182	forward
GJB7-4105	4374367	4374439	182	forward
GJB7-938	1044973	1046163	184	reverse
GJB7-2992	3178824	3179294	184	reverse
GJB7-3431	3619405	3619599	184	reverse
GJB7-4181	4451823	4454177	184	reverse
GJB7-380	439691	440146	184	forward
GJB7-612	691643	692215	184	forward
GJB7-2453	2589478	2591178	184	forward
GJB7-4033	4292681	4293583	184	forward
GJB7-4149	4417901	4420901	184	forward
GJB7-272	314490	315983	185	forward
GJB7-441	503571	504842	185	forward
GJB7-498	566610	569024	185	forward
GJB7-916	1017164	1017856	185	forward
GJB7-3915	4170566	4170919	185	forward
GJB7-4217	4489330	4490409	185	forward
GJB7-4430	4725715	4726203	186	reverse
GJB7-3736	3971323	3972860	186	forward
GJB7-4139	4407263	4407853	186	forward
GJB7-4218	4490595	4491788	186	forward
GJB7-251	294510	294631	187	forward
GJB7-3872	4126519	4126640	187	forward
GJB7-3096	3286184	3287230	188	reverse
GJB7-3842	4090346	4092175	188	reverse
GJB7-349	401375	402628	188	forward
GJB7-1834	1960164	1961897	188	forward
GJB7-2473	2611826	2612464	188	forward
GJB7-3974	4231905	4232420	188	forward
GJB7-2174	2296604	2298073	189	reverse
GJB7-2444	2577047	2577505	189	reverse
GJB7-3140	3333347	3334465	189	reverse
GJB7-3787	4028840	4030501	189	reverse
GJB7-3800	4039909	4041309	189	reverse
GJB7-1181	1286319	1286558	190	reverse
GJB7-1638	1757440	1758177	190	reverse
GJB7-1747	1872138	1872596	190	reverse
GJB7-2922	3094035	3094346	190	reverse
GJB7-4522	4831447	4831530	190	reverse
GJB7-2999	3186603	3186821	190	forward
GJB7-3995	4257193	4257996	190	forward
GJB7-1738	1866419	1866592	191	reverse
GJB7-3766	4006848	4007300	191	reverse
GJB7-886	979235	981511	191	forward
GJB7-705	788325	790103	192	forward
GJB7-1478	1581046	1581534	192	forward
GJB7-1773	1897627	1898508	193	reverse
GJB7-1839	1967850	1969001	193	reverse
GJB7-1943	2057169	2058410	193	reverse
GJB7-2382	2524274	2526463	193	reverse
GJB7-3356	3557360	3561073	193	reverse
GJB7-4148	4417635	4417707	193	forward
GJB7-944	1053398	1054600	194	reverse
GJB7-2657	2823570	2824736	194	forward
GJB7-4077	4338215	4339771	194	forward
GJB7-1552	1665909	1666484	195	reverse
GJB7-1982	2089022	2090476	195	reverse
GJB7-2511	2677776	2678291	195	reverse
GJB7-2525	2690063	2691202	195	reverse
GJB7-249	290967	291039	195	forward
GJB7-1590	1710516	1711031	195	forward
GJB7-2813	2992506	2992579	196	reverse
GJB7-4166	4439207	4439935	196	reverse
GJB7-397	459046	460110	196	forward
GJB7-770	853349	854026	196	forward
GJB7-1207	1306706	1307251	196	forward
[truncated: 1,875 more rows]

## Sheet: SL1344GenesOverlapping
Salmonella enterica enterica serovar Typhimurium str. SL1344, Overlapping between genes
Data source: biocyc.org v20.5
Description of Columns
1.- Gene name
2.- Columns 2 and 3 contains the start and end gene coordinates
4.-Distance in nucleotides between the end of gene 1 and the beggining of gene 2
5.-Transcription-Direction (strand)
Gene name	left	right	Dist_Gen2	Strand
GJB7-1957	2068665	2069282	-134	reverse
GJB7-988	1087933	1088670	-103	forward
GJB7-2563	2738544	2739191	-103	reverse
GJB7-3475	3664732	3665970	-86	reverse
GJB7-833	925442	925957	-83	forward
GJB7-974	1075762	1077309	-77	forward
GJB7-894	986884	987102	-73	reverse
GJB7-2697	2869282	2869485	-71	reverse
GJB7-1087	1189154	1189693	-65	forward
GJB7-1942	2056541	2057227	-59	reverse
GJB7-4101	4369506	4371392	-56	forward
GJB7-4524	4832852	4833289	-56	forward
GJB7-1959	2070185	2071393	-55	reverse
GJB7-1468	1568155	1568898	-50	reverse
GJB7-1924	2042364	2043959	-47	reverse
GJB7-1322	1428201	1429979	-44	forward
GJB7-2861	3036364	3037044	-44	reverse
GJB7-3251	3454032	3456074	-43	forward
GJB7-4514	4826700	4827425	-40	forward
GJB7-1777	1902180	1903463	-38	forward
GJB7-425	485713	486303	-38	reverse
GJB7-2696	2868888	2869319	-38	reverse
GJB7-2650	2818683	2818883	-37	forward
GJB7-2734	2897574	2897894	-37	forward
GJB7-3821	4067156	4067515	-37	forward
GJB7-2718	2885007	2885348	-37	reverse
GJB7-1347	1448441	1449115	-35	forward
GJB7-4086	4350252	4352549	-35	forward
GJB7-329	378459	379217	-35	reverse
GJB7-1937	2053859	2054377	-35	reverse
GJB7-1378	1475438	1476334	-34	reverse
GJB7-609	687515	689176	-32	forward
GJB7-3304	3503949	3504524	-32	forward
GJB7-3828	4075388	4076575	-32	forward
GJB7-1923	2041795	2042394	-31	reverse
GJB7-4327	4618948	4620495	-29	forward
GJB7-603	681894	682790	-29	reverse
GJB7-1927	2045059	2045604	-29	reverse
GJB7-2567	2740873	2743968	-29	reverse
GJB7-2581	2753274	2755205	-29	reverse
GJB7-2862	3037001	3037600	-29	reverse
GJB7-2947	3123641	3123931	-29	reverse
GJB7-3391	3596717	3597190	-29	reverse
GJB7-4531	4839369	4840232	-29	reverse
GJB7-334	385057	385821	-28	forward
GJB7-337	388268	389011	-28	forward
GJB7-2798	2974675	2975085	-28	forward
GJB7-4341	4636153	4637223	-28	forward
GJB7-588	665540	666157	-28	reverse
GJB7-1307	1411048	1411794	-26	forward
GJB7-1628	1748418	1748597	-26	forward
GJB7-1473	1574173	1575198	-26	reverse
GJB7-1852	1980867	1982288	-26	reverse
GJB7-2086	2192793	2194007	-26	reverse
GJB7-106	124104	125714	-25	reverse
GJB7-4294	4587963	4589666	-25	reverse
GJB7-411	471511	472488	-23	forward
GJB7-3625	3850667	3851248	-23	forward
GJB7-560	635419	635889	-23	reverse
GJB7-1920	2039277	2039438	-23	reverse
GJB7-2441	2575072	2575761	-23	reverse
GJB7-2711	2879070	2879447	-23	reverse
GJB7-2884	3058832	3059275	-23	reverse
GJB7-3115	3305580	3306137	-23	reverse
GJB7-4459	4761955	4762776	-23	reverse
GJB7-932	1034769	1036091	-20	forward
GJB7-977	1079721	1080020	-20	forward
GJB7-1147	1247295	1247933	-20	forward
GJB7-1330	1437254	1438747	-20	forward
GJB7-1352	1453847	1454224	-20	forward
GJB7-1353	1454205	1454579	-20	forward
GJB7-3713	3944832	3946055	-20	forward
GJB7-543	614292	615944	-20	reverse
GJB7-1912	2031446	2031916	-20	reverse
GJB7-2002	2104439	2105494	-20	reverse
GJB7-2918	3091039	3091800	-20	reverse
GJB7-3037	3226728	3227141	-20	reverse
GJB7-4131	4400255	4400455	-20	reverse
GJB7-2050	2152366	2153103	-19	forward
GJB7-2930	3101466	3102116	-19	reverse
GJB7-3600	3815219	3818761	-19	reverse
GJB7-776	860462	861619	-17	forward
GJB7-969	1071458	1071793	-17	forward
GJB7-3757	4000107	4000466	-17	forward
GJB7-4412	4707051	4708184	-17	forward
GJB7-105	123413	124120	-17	reverse
GJB7-331	380513	383080	-17	reverse
GJB7-1165	1267325	1268188	-17	reverse
GJB7-2003	2105475	2106248	-17	reverse
GJB7-2137	2254963	2255694	-17	reverse
GJB7-2580	2753087	2753290	-17	reverse
GJB7-3477	3666276	3666749	-17	reverse
GJB7-3809	4053093	4053710	-17	reverse
GJB7-4156	4428082	4428516	-17	reverse
GJB7-275	317659	318144	-16	forward
GJB7-1349	1450155	1450523	-16	forward
GJB7-2030	2128718	2129170	-16	forward
GJB7-2892	3067839	3068288	-16	forward
GJB7-995	1098604	1098903	-16	reverse
GJB7-2989	3177561	3177881	-16	reverse
GJB7-3980	4240700	4241434	-16	reverse
GJB7-121	141729	143495	-14	forward
GJB7-492	561974	562651	-14	forward
GJB7-784	871419	871904	-14	forward
GJB7-1415	1517104	1517466	-14	forward
GJB7-1622	1742349	1743143	-14	forward
GJB7-3145	3338358	3338768	-14	forward
GJB7-3242	3445116	3446543	-14	forward
GJB7-3320	3523255	3524508	-14	forward
GJB7-3556	3761669	3762265	-14	forward
GJB7-4495	4806232	4806519	-14	forward
GJB7-268	309104	309928	-14	reverse
GJB7-673	752137	753276	-14	reverse
GJB7-1539	1655215	1655811	-14	reverse
GJB7-1995	2099738	2100415	-14	reverse
GJB7-2057	2160148	2161581	-14	reverse
GJB7-2120	2237977	2238777	-14	reverse
GJB7-2230	2352576	2353445	-14	reverse
GJB7-2421	2556975	2557424	-14	reverse
GJB7-2692	2866551	2867459	-14	reverse
GJB7-2726	2891273	2892970	-14	reverse
GJB7-2727	2892957	2893190	-14	reverse
GJB7-2775	2954935	2956350	-14	reverse
GJB7-2870	3044647	3046278	-14	reverse
GJB7-2878	3054109	3055179	-14	reverse
GJB7-2924	3094911	3095516	-14	reverse
GJB7-3344	3546695	3547360	-14	reverse
GJB7-3748	3989128	3989871	-14	reverse
GJB7-4222	4493593	4493931	-14	reverse
GJB7-3064	3255047	3255754	-13	forward
GJB7-1463	1564881	1565768	-13	reverse
GJB7-3634	3859051	3859536	-13	reverse
GJB7-4178	4449630	4450673	-13	reverse
GJB7-160	191146	192417	-11	forward
GJB7-695	778868	779800	-11	forward
GJB7-963	1067940	1068086	-11	forward
GJB7-1056	1158770	1159393	-11	forward
GJB7-1139	1238820	1239776	-11	forward
GJB7-1194	1297610	1298584	-11	forward
GJB7-1350	1450508	1452553	-11	forward
GJB7-1718	1845336	1845932	-11	forward
GJB7-2017	2118568	2120400	-11	forward
GJB7-2256	2387952	2389580	-11	forward
GJB7-3368	3573454	3573696	-11	forward
GJB7-4228	4499778	4501166	-11	forward
GJB7-4416	4712031	4712273	-11	forward
GJB7-4504	4816441	4817220	-11	forward
GJB7-141	165131	166333	-11	reverse
GJB7-1476	1578262	1579503	-11	reverse
GJB7-1481	1583418	1583702	-11	reverse
GJB7-2004	2106232	2106810	-11	reverse
GJB7-2233	2356617	2356880	-11	reverse
GJB7-2336	2474406	2475080	-11	reverse
GJB7-2368	2504977	2506224	-11	reverse
GJB7-2414	2550346	2551443	-11	reverse
GJB7-2434	2569086	2570273	-11	reverse
GJB7-2558	2731024	2731602	-11	reverse
GJB7-2672	2836766	2837056	-11	reverse
GJB7-2709	2877245	2878222	-11	reverse
GJB7-2881	3056247	3056921	-11	reverse
GJB7-3138	3331190	3332368	-11	reverse
GJB7-3357	3561267	3562736	-11	reverse
GJB7-3457	3641837	3642439	-11	reverse
GJB7-3476	3665885	3666286	-11	reverse
GJB7-3785	4027697	4028059	-11	reverse
GJB7-3802	4042124	4044676	-11	reverse
GJB7-4184	4455255	4456682	-11	reverse
GJB7-1241	1339047	1340273	-10	forward
GJB7-2847	3022799	3023671	-10	forward
GJB7-2855	3030679	3031539	-10	forward
GJB7-2522	2687050	2688036	-10	reverse
GJB7-2715	2881397	2883640	-10	reverse
GJB7-2991	3178270	3178833	-10	reverse
GJB7-4172	4444106	4445221	-10	reverse
GJB7-4512	4824747	4825220	-10	reverse
GJB7-26	29994	30512	-8	forward
GJB7-63	72403	72954	-8	forward
GJB7-85	98258	98788	-8	forward
GJB7-128	151146	152621	-8	forward
GJB7-452	516253	518025	-8	forward
GJB7-501	571467	572483	-8	forward
GJB7-594	672639	673199	-8	forward
GJB7-777	861603	862358	-8	forward
GJB7-931	1033973	1034776	-8	forward
GJB7-976	1079405	1079728	-8	forward
GJB7-1090	1192559	1194094	-8	forward
GJB7-1157	1258821	1260020	-8	forward
GJB7-1244	1342770	1344113	-8	forward
GJB7-1695	1821135	1822931	-8	forward
GJB7-1891	2014107	2015789	-8	forward
GJB7-1892	2015782	2016777	-8	forward
GJB7-2643	2813398	2813916	-8	forward
GJB7-2801	2978527	2979729	-8	forward
GJB7-2829	3004213	3004986	-8	forward
GJB7-3093	3283231	3283824	-8	forward
GJB7-3657	3883771	3884433	-8	forward
GJB7-4241	4531669	4532079	-8	forward
GJB7-4250	4540175	4541131	-8	forward
GJB7-4276	4575615	4576241	-8	forward
GJB7-4330	4622274	4624130	-8	forward
GJB7-204	241265	242065	-8	reverse
GJB7-235	280042	280296	-8	reverse
GJB7-244	286368	287021	-8	reverse
GJB7-528	600873	601310	-8	reverse
GJB7-796	880090	881220	-8	reverse
GJB7-797	881213	882949	-8	reverse
GJB7-951	1061156	1061314	-8	reverse
GJB7-1036	1138602	1139966	-8	reverse
GJB7-1319	1423207	1426269	-8	reverse
GJB7-1393	1488422	1490629	-8	reverse
GJB7-1838	1965779	1967857	-8	reverse
GJB7-2138	2255678	2256625	-8	reverse
GJB7-2306	2443613	2444290	-8	reverse
GJB7-2312	2450865	2451818	-8	reverse
GJB7-2399	2536497	2536724	-8	reverse
GJB7-2499	2659201	2660010	-8	reverse
GJB7-2596	2764017	2764298	-8	reverse
GJB7-2682	2857482	2860289	-8	reverse
GJB7-2691	2865953	2866558	-8	reverse
GJB7-2695	2868449	2868895	-8	reverse
GJB7-2837	3014281	3014751	-8	reverse
GJB7-2972	3154227	3155327	-8	reverse
GJB7-2986	3167570	3171115	-8	reverse
GJB7-3001	3188139	3189341	-8	reverse
GJB7-3134	3328181	3328522	-8	reverse
GJB7-3135	3328515	3329003	-8	reverse
GJB7-3149	3340712	3341446	-8	reverse
GJB7-3280	3483112	3484449	-8	reverse
GJB7-3468	3657766	3658770	-8	reverse
GJB7-3469	3658763	3659521	-8	reverse
GJB7-3553	3758349	3759404	-8	reverse
GJB7-3704	3937262	3938059	-8	reverse
GJB7-3740	3979037	3979519	-8	reverse
GJB7-3761	4002066	4003550	-8	reverse
GJB7-3801	4041499	4042131	-8	reverse
GJB7-4024	4284831	4286138	-8	reverse
GJB7-4132	4400436	4401194	-8	reverse
GJB7-4171	4443481	4444113	-8	reverse
GJB7-4313	4603836	4604570	-8	reverse
GJB7-123	144966	146324	-7	forward
GJB7-289	332521	336123	-7	forward
GJB7-694	778218	778874	-7	forward
GJB7-713	797403	797792	-7	forward
GJB7-1195	1298574	1299386	-7	forward
GJB7-1196	1299380	1300177	-7	forward
GJB7-2051	2153085	2153861	-7	forward
GJB7-2160	2279109	2280350	-7	forward
GJB7-3065	3255742	3256419	-7	forward
GJB7-3996	4258187	4258786	-7	forward
GJB7-4046	4304939	4306474	-7	forward
GJB7-754	836593	837633	-7	reverse
GJB7-1983	2090672	2090998	-7	reverse
GJB7-2005	2106800	2107405	-7	reverse
GJB7-2908	3082009	3083271	-7	reverse
GJB7-2917	3090419	3091045	-7	reverse
GJB7-28	31274	32119	-4	forward
GJB7-60	69713	70006	-4	forward
GJB7-78	90464	91750	-4	forward
GJB7-119	140410	141351	-4	forward
GJB7-122	143482	144969	-4	forward
GJB7-126	148806	149963	-4	forward
GJB7-130	153536	154366	-4	forward
GJB7-145	169358	169921	-4	forward
GJB7-159	190196	191149	-4	forward
GJB7-170	202177	203103	-4	forward
GJB7-191	226770	227660	-4	forward
GJB7-196	234790	235257	-4	forward
GJB7-227	267779	268927	-4	forward
GJB7-237	280687	281232	-4	forward
GJB7-279	319747	321090	-4	forward
GJB7-284	327706	328494	-4	forward
GJB7-353	408252	409655	-4	forward
GJB7-497	565927	566613	-4	forward
GJB7-571	644735	644953	-4	forward
GJB7-595	673192	675471	-4	forward
GJB7-639	717608	718315	-4	forward
GJB7-725	812438	812842	-4	forward
GJB7-768	851095	852318	-4	forward
GJB7-775	859425	860465	-4	forward
GJB7-814	901532	902005	-4	forward
GJB7-858	949988	950941	-4	forward
GJB7-871	961904	962227	-4	forward
GJB7-882	975148	976266	-4	forward
GJB7-924	1027002	1028750	-4	forward
GJB7-927	1031052	1031234	-4	forward
GJB7-957	1064557	1064904	-4	forward
GJB7-962	1067332	1067943	-4	forward
GJB7-970	1071777	1072229	-4	forward
GJB7-978	1080001	1080567	-4	forward
GJB7-983	1082510	1085563	-4	forward
GJB7-1005	1111507	1113147	-4	forward
GJB7-1042	1144543	1145832	-4	forward
GJB7-1055	1156887	1158773	-4	forward
GJB7-1140	1239766	1240407	-4	forward
GJB7-1242	1340264	1341298	-4	forward
GJB7-1243	1341295	1342773	-4	forward
GJB7-1301	1403356	1406412	-4	forward
GJB7-1308	1411769	1413040	-4	forward
GJB7-1334	1440786	1441376	-4	forward
GJB7-1340	1444827	1445609	-4	forward
GJB7-1344	1446884	1447132	-4	forward
GJB7-1346	1447896	1448444	-4	forward
GJB7-1355	1455596	1456243	-4	forward
GJB7-1357	1456507	1457286	-4	forward
GJB7-1508	1617540	1621280	-4	forward
GJB7-1510	1622821	1623516	-4	forward
GJB7-1525	1637948	1640929	-4	forward
GJB7-1543	1658651	1659769	-4	forward
GJB7-1566	1682184	1682915	-4	forward
GJB7-1648	1771222	1771983	-4	forward
GJB7-1707	1832877	1833500	-4	forward
GJB7-1715	1841681	1842799	-4	forward
GJB7-1717	1844608	1845339	-4	forward
GJB7-1719	1845922	1846326	-4	forward
GJB7-1818	1945006	1945761	-4	forward
GJB7-1827	1954775	1955341	-4	forward
GJB7-1830	1956645	1957388	-4	forward
GJB7-1887	2011310	2012575	-4	forward
GJB7-1895	2018869	2019312	-4	forward
GJB7-1898	2021103	2022107	-4	forward
GJB7-1965	2075984	2076499	-4	forward
GJB7-1966	2076496	2077113	-4	forward
GJB7-2021	2121520	2122152	-4	forward
GJB7-2024	2122929	2123939	-4	forward
GJB7-2026	2125342	2126454	-4	forward
GJB7-2046	2148332	2149636	-4	forward
GJB7-2047	2149633	2150712	-4	forward
GJB7-2048	2150709	2151776	-4	forward
GJB7-2102	2216364	2219444	-4	forward
GJB7-2104	2220853	2222256	-4	forward
GJB7-2116	2233987	2235258	-4	forward
GJB7-2155	2275638	2276036	-4	forward
GJB7-2158	2277943	2278662	-4	forward
GJB7-2257	2389570	2390829	-4	forward
GJB7-2270	2402829	2403812	-4	forward
GJB7-2271	2403809	2405791	-4	forward
GJB7-2272	2405788	2406687	-4	forward
GJB7-2653	2819480	2819704	-4	forward
GJB7-2656	2823088	2823573	-4	forward
GJB7-2676	2850307	2851716	-4	forward
GJB7-2723	2887497	2888522	-4	forward
GJB7-2732	2896802	2897353	-4	forward
GJB7-2733	2897350	2897577	-4	forward
GJB7-2745	2911787	2912308	-4	forward
GJB7-2746	2912305	2912679	-4	forward
GJB7-2761	2933257	2933556	-4	forward
GJB7-2795	2973730	2974161	-4	forward
GJB7-2797	2974433	2974678	-4	forward
GJB7-2824	3000884	3001447	-4	forward
GJB7-2832	3007647	3009086	-4	forward
GJB7-2849	3023934	3025055	-4	forward
GJB7-2853	3028947	3029864	-4	forward
GJB7-2854	3029861	3030682	-4	forward
GJB7-2896	3069908	3070198	-4	forward
GJB7-3091	3282370	3282936	-4	forward
GJB7-3167	3361502	3362161	-4	forward
GJB7-3218	3417811	3418209	-4	forward
GJB7-3303	3503386	3503952	-4	forward
GJB7-3310	3508225	3509079	-4	forward
GJB7-3449	3634117	3635184	-4	forward
GJB7-3461	3644998	3647541	-4	forward
GJB7-3516	3715262	3716596	-4	forward
GJB7-3534	3739737	3740708	-4	forward
GJB7-3606	3825989	3827560	-4	forward
GJB7-3607	3827557	3827748	-4	forward
GJB7-3656	3882278	3883774	-4	forward
GJB7-3668	3898719	3899867	-4	forward
GJB7-3674	3907227	3908882	-4	forward
GJB7-3675	3908879	3909655	-4	forward
GJB7-3680	3914040	3915218	-4	forward
GJB7-3883	4137213	4137530	-4	forward
GJB7-3895	4150835	4151965	-4	forward
GJB7-3901	4156340	4157590	-4	forward
GJB7-3902	4157587	4158666	-4	forward
GJB7-3903	4158663	4160021	-4	forward
GJB7-3921	4173804	4174631	-4	forward
GJB7-3922	4174628	4175335	-4	forward
GJB7-3945	4199601	4200206	-4	forward
GJB7-3997	4258780	4259652	-4	forward
GJB7-3998	4259649	4260086	-4	forward
GJB7-4047	4306468	4307511	-4	forward
GJB7-4108	4378003	4379031	-4	forward
GJB7-4194	4463822	4464490	-4	forward
GJB7-4227	4499149	4499781	-4	forward
GJB7-4229	4501156	4502475	-4	forward
GJB7-4248	4538944	4539510	-4	forward
GJB7-4249	4539507	4540178	-4	forward
GJB7-4251	4541124	4543346	-4	forward
GJB7-4286	4583140	4583433	-4	forward
GJB7-4378	4666633	4668366	-4	forward
GJB7-4413	4708168	4709286	-4	forward
GJB7-4529	4837493	4838566	-4	forward
GJB7-90	102666	103487	-4	reverse
GJB7-181	213394	213873	-4	reverse
GJB7-241	284287	284994	-4	reverse
GJB7-265	305722	306717	-4	reverse
GJB7-267	308613	309107	-4	reverse
GJB7-344	393379	396546	-4	reverse
GJB7-388	445727	448867	-4	reverse
GJB7-490	560461	560913	-4	reverse
GJB7-522	595540	596607	-4	reverse
GJB7-527	600052	600876	-4	reverse
GJB7-544	615925	616851	-4	reverse
GJB7-574	650273	651067	-4	reverse
GJB7-606	684856	685764	-4	reverse
GJB7-607	685761	686057	-4	reverse
GJB7-651	732177	732650	-4	reverse
GJB7-683	761474	762793	-4	reverse
GJB7-685	765750	766427	-4	reverse
GJB7-686	766424	769108	-4	reverse
GJB7-792	876367	877608	-4	reverse
GJB7-807	894003	894725	-4	reverse
GJB7-846	939042	939857	-4	reverse
GJB7-1097	1201001	1201576	-4	reverse
GJB7-1176	1280075	1280404	-4	reverse
GJB7-1289	1388773	1389066	-4	reverse
GJB7-1465	1566835	1567245	-4	reverse
GJB7-1490	1595045	1597573	-4	reverse
GJB7-1613	1734723	1735784	-4	reverse
GJB7-1672	1792476	1793480	-4	reverse
GJB7-1691	1813027	1813737	-4	reverse
GJB7-1692	1813734	1815269	-4	reverse
GJB7-1703	1828965	1829354	-4	reverse
GJB7-1842	1970257	1971306	-4	reverse
GJB7-1847	1976765	1977694	-4	reverse
GJB7-1869	1993986	1995818	-4	reverse
GJB7-1873	1998180	1998932	-4	reverse
GJB7-1930	2046527	2047585	-4	reverse
GJB7-1933	2050969	2051295	-4	reverse
GJB7-1936	2053302	2053862	-4	reverse
GJB7-1938	2054343	2054747	-4	reverse
GJB7-1944	2058604	2060337	-4	reverse
GJB7-1949	2062519	2063004	-4	reverse
GJB7-1991	2096115	2096858	-4	reverse
GJB7-1992	2096855	2097400	-4	reverse
GJB7-1993	2097397	2098917	-4	reverse
GJB7-1997	2100685	2101422	-4	reverse
GJB7-1998	2101419	2102132	-4	reverse
GJB7-2000	2102926	2103717	-4	reverse
GJB7-2008	2109181	2110140	-4	reverse
GJB7-2037	2135036	2135800	-4	reverse
GJB7-2066	2171065	2171838	-4	reverse
GJB7-2074	2179157	2180377	-4	reverse
GJB7-2080	2187655	2188878	-4	reverse
GJB7-2087	2193982	2195199	-4	reverse
GJB7-2090	2196616	2198775	-4	reverse
GJB7-2133	2251460	2252179	-4	reverse
GJB7-2220	2345109	2346152	-4	reverse
GJB7-2221	2346149	2346706	-4	reverse
GJB7-2222	2346703	2348634	-4	reverse
GJB7-2223	2348631	2349110	-4	reverse
GJB7-2232	2354134	2356620	-4	reverse
GJB7-2277	2409389	2410756	-4	reverse
GJB7-2280	2412587	2413345	-4	reverse
GJB7-2290	2425377	2427218	-4	reverse
GJB7-2291	2427215	2427517	-4	reverse
GJB7-2294	2428636	2429613	-4	reverse
GJB7-2296	2432367	2433704	-4	reverse
GJB7-2313	2451811	2452641	-4	reverse
GJB7-2324	2460634	2461341	-4	reverse
GJB7-2369	2506214	2508220	-4	reverse
GJB7-2407	2545034	2545273	-4	reverse
GJB7-2432	2566340	2567743	-4	reverse
GJB7-2439	2573259	2574275	-4	reverse
GJB7-2440	2574272	2575075	-4	reverse
GJB7-2500	2660003	2660632	-4	reverse
GJB7-2533	2701791	2703128	-4	reverse
GJB7-2550	2721642	2722547	-4	reverse
GJB7-2559	2731592	2732416	-4	reverse
GJB7-2579	2751510	2753090	-4	reverse
GJB7-2584	2756646	2757119	-4	reverse
GJB7-2589	2760589	2761266	-4	reverse
GJB7-2590	2761263	2761403	-4	reverse
GJB7-2600	2766099	2766791	-4	reverse
GJB7-2611	2777727	2778206	-4	reverse
GJB7-2635	2805232	2805963	-4	reverse
GJB7-2680	2855903	2857003	-4	reverse
GJB7-2681	2857000	2857485	-4	reverse
GJB7-2690	2864337	2865956	-4	reverse
GJB7-2693	2867446	2867805	-4	reverse
GJB7-2698	2869415	2869843	-4	reverse
GJB7-2716	2883631	2884488	-4	reverse
GJB7-2730	2895025	2895267	-4	reverse
GJB7-2759	2930361	2930999	-4	reverse
GJB7-2811	2991144	2991569	-4	reverse
GJB7-2838	3014744	3015154	-4	reverse
GJB7-2860	3035915	3036367	-4	reverse
GJB7-2863	3037572	3038330	-4	reverse
GJB7-2885	3059253	3060548	-4	reverse
GJB7-2888	3063058	3064176	-4	reverse
GJB7-2889	3064173	3065861	-4	reverse
GJB7-2901	3075478	3075858	-4	reverse
GJB7-2904	3078125	3079621	-4	reverse
GJB7-2907	3081374	3082012	-4	reverse
GJB7-2919	3091781	3092830	-4	reverse
GJB7-2928	3100256	3100552	-4	reverse
GJB7-2929	3100549	3101469	-4	reverse
GJB7-2933	3103927	3104487	-4	reverse
GJB7-2954	3133363	3134703	-4	reverse
GJB7-2985	3165738	3167573	-4	reverse
GJB7-2990	3177866	3178273	-4	reverse
GJB7-3019	3208086	3209162	-4	reverse
GJB7-3048	3239185	3240363	-4	reverse
GJB7-3137	3329490	3331193	-4	reverse
GJB7-3174	3368019	3368441	-4	reverse
GJB7-3313	3510304	3511032	-4	reverse
GJB7-3322	3525858	3526325	-4	reverse
GJB7-3323	3526322	3527197	-4	reverse
GJB7-3387	3594494	3594751	-4	reverse
GJB7-3425	3616124	3616426	-4	reverse
GJB7-3523	3725444	3727420	-4	reverse
GJB7-3526	3731480	3732820	-4	reverse
GJB7-3538	3744081	3744821	-4	reverse
GJB7-3540	3745890	3746735	-4	reverse
GJB7-3543	3749258	3749626	-4	reverse
GJB7-3546	3750691	3751458	-4	reverse
GJB7-3547	3751455	3752732	-4	reverse
GJB7-3570	3774280	3777021	-4	reverse
GJB7-3603	3822167	3824791	-4	reverse
GJB7-3610	3831655	3832668	-4	reverse
GJB7-3664	3892161	3894011	-4	reverse
GJB7-3705	3938052	3939176	-4	reverse
GJB7-3763	4004977	4005264	-4	reverse
GJB7-3784	4027170	4027700	-4	reverse
GJB7-3792	4033634	4034677	-4	reverse
GJB7-3793	4034674	4035231	-4	reverse
GJB7-3794	4035228	4037159	-4	reverse
GJB7-3795	4037156	4037635	-4	reverse
GJB7-3796	4037632	4037844	-4	reverse
GJB7-3799	4039286	4039912	-4	reverse
GJB7-3808	4051948	4053096	-4	reverse
GJB7-3810	4053694	4054572	-4	reverse
GJB7-3912	4165857	4166597	-4	reverse
GJB7-3966	4223122	4223637	-4	reverse
GJB7-3981	4241419	4242297	-4	reverse
GJB7-4005	4263723	4264652	-4	reverse
GJB7-4006	4264649	4265284	-4	reverse
GJB7-4015	4274934	4275248	-4	reverse
GJB7-4018	4277490	4278749	-4	reverse
GJB7-4030	4289814	4291187	-4	reverse
GJB7-4129	4398353	4399486	-4	reverse
GJB7-4168	4440671	4441126	-4	reverse
GJB7-4175	4447282	4448211	-4	reverse
GJB7-4185	4456672	4456869	-4	reverse
GJB7-4243	4532800	4534449	-4	reverse
GJB7-4262	4555011	4555679	-4	reverse
GJB7-4273	4570469	4571188	-4	reverse
GJB7-4283	4581178	4581465	-4	reverse
GJB7-4381	4672543	4673751	-4	reverse
GJB7-4463	4771221	4771823	-4	reverse
GJB7-4480	4787861	4788322	-4	reverse
GJB7-4491	4798189	4799598	-4	reverse
GJB7-4537	4846478	4847050	-4	reverse
GJB7-47	53855	56689	-1	forward
GJB7-62	70883	72403	-1	forward
GJB7-190	225973	226770	-1	forward
GJB7-197	235254	235730	-1	forward
GJB7-198	235730	236260	-1	forward
GJB7-226	266991	267779	-1	forward
GJB7-283	323837	327706	-1	forward
GJB7-324	374315	375193	-1	forward
GJB7-475	542369	542698	-1	forward
GJB7-581	658552	659409	-1	forward
GJB7-596	675468	676025	-1	forward
GJB7-714	797786	798133	-1	forward
GJB7-719	805322	806488	-1	forward
GJB7-751	833671	834750	-1	forward
GJB7-762	844929	845702	-1	forward
GJB7-933	1036072	1036776	-1	forward
GJB7-991	1093029	1095236	-1	forward
GJB7-1121	1219498	1220595	-1	forward
GJB7-1158	1260013	1260714	-1	forward
GJB7-1193	1295976	1297610	-1	forward
GJB7-1279	1377496	1378047	-1	forward
GJB7-1457	1559497	1560423	-1	forward
GJB7-1509	1621277	1622821	-1	forward
GJB7-1521	1635198	1635713	-1	forward
GJB7-1549	1663420	1664211	-1	forward
GJB7-1623	1743130	1744020	-1	forward
GJB7-1653	1775403	1776965	-1	forward
GJB7-1656	1779932	1781125	-1	forward
GJB7-1883	2008388	2008795	-1	forward
GJB7-1893	2016770	2017477	-1	forward
GJB7-1899	2022104	2022517	-1	forward
GJB7-1900	2022517	2022894	-1	forward
GJB7-2020	2121038	2121520	-1	forward
GJB7-2028	2127809	2128363	-1	forward
GJB7-2049	2151773	2152366	-1	forward
GJB7-2100	2212000	2213241	-1	forward
GJB7-2103	2219441	2220853	-1	forward
GJB7-2106	2223562	2224446	-1	forward
GJB7-2191	2315750	2316844	-1	forward
GJB7-2250	2381514	2382644	-1	forward
GJB7-2274	2408405	2408662	-1	forward
GJB7-2347	2484631	2484999	-1	forward
GJB7-2463	2602783	2603355	-1	forward
GJB7-2472	2610774	2611826	-1	forward
GJB7-2652	2819253	2819480	-1	forward
GJB7-2707	2874421	2876187	-1	forward
GJB7-2848	3023662	3023934	-1	forward
GJB7-2912	3085743	3086336	-1	forward
GJB7-2976	3157418	3158623	-1	forward
GJB7-3086	3278805	3279368	-1	forward
GJB7-3694	3927565	3928611	-1	forward
GJB7-3826	4072689	4073651	-1	forward
GJB7-3830	4077661	4078416	-1	forward
GJB7-3878	4130518	4132164	-1	forward
GJB7-3923	4175332	4176234	-1	forward
GJB7-3957	4213234	4214565	-1	forward
GJB7-4195	4464487	4465224	-1	forward
GJB7-4356	4648679	4649533	-1	forward
GJB7-4408	4704873	4705235	-1	forward
GJB7-4446	4742937	4744037	-1	forward
GJB7-91	103484	104473	-1	reverse
GJB7-111	131079	132170	-1	reverse
GJB7-138	162468	163211	-1	reverse
GJB7-147	170864	171814	-1	reverse
GJB7-432	493742	494071	-1	reverse
GJB7-563	637266	637634	-1	reverse
GJB7-575	651064	652053	-1	reverse
GJB7-630	706899	707930	-1	reverse
GJB7-645	726021	726746	-1	reverse
GJB7-646	726746	727420	-1	reverse
GJB7-791	875405	876367	-1	reverse
GJB7-798	882942	883937	-1	reverse
GJB7-824	914223	914972	-1	reverse
GJB7-866	958163	958831	-1	reverse
GJB7-1052	1155016	1155321	-1	reverse
GJB7-1170	1274079	1275542	-1	reverse
GJB7-1226	1324327	1325211	-1	reverse
GJB7-1377	1473399	1475438	-1	reverse
GJB7-1389	1485409	1486044	-1	reverse
GJB7-1394	1490622	1491200	-1	reverse
GJB7-1424	1525377	1526525	-1	reverse
GJB7-1466	1567242	1567541	-1	reverse
GJB7-1576	1693815	1694006	-1	reverse
GJB7-1617	1737958	1738317	-1	reverse
GJB7-1637	1757114	1757440	-1	reverse
GJB7-1690	1812350	1813027	-1	reverse
GJB7-1704	1829351	1830184	-1	reverse
GJB7-1837	1965387	1965779	-1	reverse
GJB7-1929	2045994	2046527	-1	reverse
GJB7-1934	2051292	2051648	-1	reverse
GJB7-1956	2067772	2068665	-1	reverse
GJB7-2001	2103714	2104439	-1	reverse
GJB7-2006	2107399	2108538	-1	reverse
GJB7-2070	2174311	2175210	-1	reverse
GJB7-2226	2350105	2350761	-1	reverse
GJB7-2278	2410753	2411715	-1	reverse
GJB7-2340	2478178	2478990	-1	reverse
GJB7-2353	2490072	2490620	-1	reverse
GJB7-2354	2490620	2491429	-1	reverse
GJB7-2360	2495821	2497968	-1	reverse
GJB7-2415	2551433	2552308	-1	reverse
GJB7-2416	2552308	2553141	-1	reverse
GJB7-2498	2658338	2659201	-1	reverse
GJB7-2547	2719779	2720159	-1	reverse
GJB7-2612	2778203	2779159	-1	reverse
GJB7-2702	2870928	2871131	-1	reverse
GJB7-2751	2916910	2917473	-1	reverse
GJB7-2839	3015151	3015918	-1	reverse
GJB7-2843	3019123	3020949	-1	reverse
GJB7-2882	3056911	3057822	-1	reverse
GJB7-2883	3057822	3058832	-1	reverse
GJB7-2920	3092827	3093306	-1	reverse
GJB7-2938	3111011	3112723	-1	reverse
GJB7-2957	3137007	3137789	-1	reverse
GJB7-3025	3215876	3216274	-1	reverse
GJB7-3098	3288188	3288514	-1	reverse
GJB7-3120	3311295	3311675	-1	reverse
GJB7-3131	3326067	3326777	-1	reverse
GJB7-3136	3328996	3329490	-1	reverse
GJB7-3172	3366586	3367167	-1	reverse
GJB7-3270	3472749	3473693	-1	reverse
GJB7-3296	3498067	3498363	-1	reverse
GJB7-3341	3543667	3544284	-1	reverse
GJB7-3359	3563328	3563819	-1	reverse
GJB7-3418	3613056	3613310	-1	reverse
GJB7-3419	3613310	3613501	-1	reverse
GJB7-3437	3624612	3624968	-1	reverse
GJB7-3438	3624968	3625354	-1	reverse
GJB7-3444	3628693	3630498	-1	reverse
GJB7-3478	3666733	3667272	-1	reverse
GJB7-3521	3722701	3724134	-1	reverse
GJB7-3569	3773156	3774280	-1	reverse
GJB7-3683	3916331	3917350	-1	reverse
GJB7-3750	3990971	3991828	-1	reverse
GJB7-3769	4010364	4011866	-1	reverse
GJB7-3798	4038630	4039286	-1	reverse
GJB7-3836	4082911	4083801	-1	reverse
GJB7-4012	4273214	4273537	-1	reverse
GJB7-4133	4401187	4401822	-1	reverse
GJB7-4174	4445735	4447282	-1	reverse
GJB7-4179	4450661	4450870	-1	reverse
GJB7-4180	4450870	4451823	-1	reverse
GJB7-4183	4454731	4455255	-1	reverse
GJB7-4442	4737596	4740451	-1	reverse
GJB7-4460	4762754	4763845	-1	reverse

## Sheet: SL1344DistTssATG
Salmonella enterica enterica serovar Typhimurium str. SL1344 Distance between the beggining of gene and the TSS position
Data source Carsten Kröge et al 2012
Description of columns
1.-Transcription start site(TSS) position
2.-Transcription direction(strand)
3.-ID gene downstream TSS
4.- The columns 4 and 5 are the co-ordinates gene downstream TSS(start and end)
6.-Distance between the TSS position and the beggining to gene
7.-Nucleotide transcription start site
TSS	Strand	ID gene	Left	Right	Dist_TSS-ATG	TSS_Seq
7483	reverse	SL0006	5966	7396	86	A
11322	reverse	SL0011	10841	11245	76	A
27254	reverse	SL0023	25803	28424	-1171	G
38239	reverse	SL0034	37103	38674	-436	A
52583	reverse	SL0044	52280	52543	39	C
52672	reverse	SL0044	52280	52543	128	A
59539	reverse	SL0051	58946	60148	-610	A
62908	reverse	SL0054	61794	63413	-506	A
103091	reverse	SL0090	102286	102663	427	A
103130	reverse	SL0091	102666	103487	-358	A
103644	reverse	SL0091	102666	103487	156	G
108316	reverse	SL0094	105813	108173	142	A
108304	reverse	SL0094	105813	108173	130	A
113046	reverse	SL0097	110005	112911	134	C
113106	reverse	SL0097	110005	112911	194	C
126802	reverse	SroA	126713	126802	-1	G
133941	reverse	SL0114	133829	133915	25	A
141689	reverse	SL0121	141348	141713	-25	T
163988	reverse	SL0140	163211	163831	156	A
163935	reverse	SL0140	163211	163831	103	A
174901	reverse	SL0150	173384	174757	143	G
189419	reverse	SL0160	188511	189353	65	G
196349	reverse	SL0168	195979	196326	22	T
200644	reverse	SL0170	198216	200606	37	G
202101	reverse	SL0172	201406	202068	32	A
202791	reverse	SL0173	202177	203103	-313	A
211469	reverse	SL0181	211027	211407	61	G
215415	reverse	SL0185	213870	215288	126	G
216901	reverse	SL0187	216394	216849	51	C
218298	reverse	SL0189	217747	218277	20	A
241303	reverse	SL0206	240605	241228	74	G
243714	reverse	SL0209	242841	244358	-645	A
247726	reverse	SL0212	247314	247700	25	G
253889	reverse	SL0216	253048	253842	46	A
280561	reverse	SL0239	280289	280507	53	G
284237	reverse	SL0243	282458	284176	60	A
284388	reverse	SL0244	284287	284994	-607	G
285422	reverse	SL0245	284991	285395	26	A
286407	reverse	SL0246	285514	286329	77	A
288115	reverse	SL0248	287014	288045	69	G
301308	reverse	SL0255	299914	301281	26	G
303848	reverse	SL0259	303393	304124	-277	A
349691	reverse	SL0302	349371	350090	-400	A
349421	reverse	SL0302	349371	350090	-670	A
351992	reverse	SL0304	351199	351966	25	A
353440	reverse	SL0305	352075	354519	-1080	A
355453	reverse	SL0306	354759	355337	115	A
357107	reverse	SL0308	356288	357028	78	T
357155	reverse	SL0308	356288	357028	126	G
361986	reverse	SL0312	360451	361908	77	A
362014	reverse	SL0312	360451	361908	105	A
374081	reverse	SL0325	373674	374300	-220	A
375384	reverse	SL0326	374315	375193	190	A
391397	reverse	SL0343	391194	391418	-22	T
391338	reverse	SL0343	391194	391418	-81	G
408206	reverse	SL0354	408034	408135	70	G
411113	reverse	SL0358	410999	412003	-891	A
414961	reverse	SL0360	414298	414930	30	T
424164	reverse	SL0367	423164	424138	25	T
432569	reverse	SL0373	432212	432520	48	A
439584	reverse	SL0381	438742	439551	32	T
439661	reverse	SL0381	438742	439551	109	A
443357	reverse	SL0387	442415	443326	30	T
458200	reverse	SL0397	457559	458161	38	G
458451	reverse	SL0397	457559	458161	289	G
460028	reverse	SL0399	459046	460110	-83	A
466783	reverse	STnc1060	466718	466783	-1	G
467963	reverse	SL0407	467023	467886	76	G
468751	reverse	SL0408	468186	468725	25	A
470566	reverse	SL0411	470522	470992	-427	G
474085	reverse	SL0415	473085	474059	25	G
477176	reverse	SL0418	476902	477144	31	G
486480	reverse	SL0427	485713	486303	176	A
497676	reverse	SL0437	496677	497633	42	A
508930	reverse	SL0446	508154	510025	-1096	A
510701	reverse	SL0448	510653	511051	-351	G
514919	reverse	SL0452	514586	515641	-723	A
522665	reverse	SL0458	521768	522628	36	A
523775	reverse	SL0460	523445	523834	-60	A
525640	reverse	SL0461	524065	525615	24	A
525681	reverse	SL0461	524065	525615	65	A
526811	reverse	SL0464	526302	526772	38	G
527215	reverse	SL0465	526889	527440	-226	C
528041	reverse	SL0466	527619	527837	203	A
528328	reverse	SL0467	527865	528239	88	A
528361	reverse	SL0467	527865	528239	121	G
533586	reverse	SL0469	531907	533100	485	A
533460	reverse	SL0469	531907	533100	359	A
533567	reverse	SL0469	531907	533100	466	A
533507	reverse	SL0469	531907	533100	406	A
539206	reverse	SL0474	538604	539119	86	G
543368	reverse	SL0479	542698	543303	64	G
546551	reverse	SL0482	546402	547364	-814	A
551548	reverse	SL0485	549838	551514	33	G
556385	reverse	SL0489	555572	556366	18	T
559996	reverse	SL0491	557433	559934	61	A
561876	reverse	SL0494	560910	561827	48	A
561920	reverse	SL0494	560910	561827	92	A
565991	reverse	SL0499	565342	565956	34	T
569812	reverse	SL0502	569210	570343	-532	G
574268	reverse	SL0506	573174	574268	-1	A
580453	reverse	SL0512	579626	580504	-52	A
598505	reverse	SL0529	597956	598450	54	C
602721	reverse	SL0535	602190	603056	-336	G
603097	reverse	SL0535	602190	603056	40	A
610589	reverse	SL0542	609744	610376	212	G
612453	reverse	SL0544	611721	612032	420	A
623518	reverse	SL0555	622186	623361	156	A
626278	reverse	SL0557	625123	626370	-93	G
626522	reverse	SL0557	625123	626370	151	G
639123	reverse	SL0570	638851	639099	23	T
664315	reverse	SL0590	663164	664252	62	A
667587	reverse	SL0593	666130	667365	221	T
677325	reverse	SL0602	676860	677288	36	G
680315	reverse	SL0605	679477	680283	31	A
692779	reverse	SL0618	692670	693053	-275	A
693081	reverse	SL0618	692670	693053	27	G
695400	reverse	SL0621	694350	695315	84	A
696497	reverse	SL0622	695521	696474	22	A
696680	reverse	SL0622	695521	696474	205	A
697721	reverse	SL0624	697517	697780	-60	G
704254	reverse	SL0630	703836	704153	100	G
705262	reverse	SL0631	704482	705090	171	A
711179	reverse	SL0636	708535	711117	61	A
729315	reverse	SL0654	728320	729246	68	A
733744	reverse	SL0658	732647	733732	11	A
733784	reverse	SL0658	732647	733732	51	A
735358	reverse	SL0659	733898	735322	35	C
737310	reverse	SL0661	736708	737283	26	T
740059	reverse	SL0662	738350	740014	44	A
742596	reverse	SL0664	741103	742323	272	A
742990	reverse	SL0665	742328	743482	-493	G
756326	reverse	SL0675	755805	756257	68	A
757125	reverse	SL0676	756539	757069	55	A
757565	reverse	SL0677	757232	757513	51	A
766500	reverse	SL0684	765750	766427	72	A
780537	reverse	SL0695	779790	780524	12	A
781645	reverse	SL0697	781039	781605	39	A
822857	reverse	SL0736	822322	822708	148	G
827567	reverse	SL0741	826600	827583	-17	A
836444	reverse	SL0749	835617	836369	74	A
840877	reverse	SL0753	839835	840851	25	A
840973	reverse	SL0753	839835	840851	121	A
844503	reverse	SL0756	843696	844484	18	T
850899	reverse	SL0763	849574	850857	41	T
850983	reverse	SL0763	849574	850857	125	A
858009	reverse	SL0769	857515	857991	17	G
859371	reverse	SL0770	858049	859338	32	C
867800	reverse	SL0776	866199	868496	-697	A
867457	reverse	SL0776	866199	868496	-1040	G
869520	reverse	SL0777	868588	869496	23	G
869594	reverse	SL0777	868588	869496	97	G
890026	reverse	SL0799	889717	889977	48	A
890554	reverse	SL0800	890262	890528	25	A
894144	reverse	SL0802	891662	893884	259	C
896464	reverse	SL0805	895525	896271	192	G
896520	reverse	SL0805	895525	896271	248	A
897292	reverse	SL0806	896748	897251	40	G
901069	reverse	SL0809	899373	900953	115	G
901397	reverse	RybA	901301	901397	-1	A
904203	reverse	SL0812	903158	904078	124	A
927674	reverse	SL0832	926740	927687	-14	A
936807	reverse	SL0840	936005	936763	43	G
937590	reverse	SL0841	936835	937443	146	A
941893	reverse	RybB	941815	941893	-1	G
943784	reverse	SL0846	941970	943655	128	A
944631	reverse	SL0848	944335	944598	32	G
946813	reverse	SL0853	946820	947296	-484	G
957972	reverse	SL0863	957195	957926	45	A
961119	reverse	SL0867	960303	961031	87	T
961067	reverse	SL0867	960303	961031	35	T
961832	reverse	SL0868	961261	961776	55	G
972229	reverse	SL0877	971296	972087	141	G
975026	reverse	SL0879	974052	975020	5	A
978647	reverse	SL0882	978339	978560	86	G
987137	reverse	SL0891	986884	987102	34	G
987370	reverse	SL0892	987030	987413	-44	G
991687	reverse	SL0895	989885	991651	35	G
992761	reverse	SL0896	991765	992733	27	A
1010322	reverse	SL0907	1009255	1010079	242	A
1010222	reverse	SL0907	1009255	1010079	142	A
1010207	reverse	SL0907	1009255	1010079	127	A
1046168	reverse	SL0935	1044973	1046163	4	T
1047551	reverse	SL0936	1046348	1047439	111	A
1049505	reverse	SL0937	1048046	1049446	58	A
1050228	reverse	SL0938	1049647	1050108	119	A
1056111	reverse	SL0942	1054795	1056087	23	G
1062027	reverse	SL0950	1061617	1061958	68	A
1065431	reverse	SL0956	1065290	1065580	-150	C
1087199	reverse	SL0983	1086605	1087138	60	G
1091555	reverse	SL0987	1089344	1092694	-1140	T
1097117	reverse	SL0991	1096293	1097261	-145	A
1099602	reverse	SL0995	1098888	1099574	27	A
1112936	reverse	SL1004	1111507	1113147	-212	A
1114775	reverse	SL1007	1114230	1114748	26	T
1116605	reverse	SL1008	1114817	1116403	201	T
1118472	reverse	SL1010	1117287	1118339	132	G
1119234	reverse	SL1011	1118696	1119205	28	A
1121708	reverse	SL1013	1120014	1122167	-460	A
1127158	reverse	SL1019	1126693	1127010	147	A
1128351	reverse	SL1020	1127068	1128279	71	C
1130527	reverse	SL1024	1130174	1130503	23	G
1131280	reverse	SL1025	1130590	1131168	111	A
1132284	reverse	SL1026	1131870	1132550	-267	A
1136295	reverse	SL1030	1134553	1136238	56	G
1138456	reverse	SL1033	1136960	1138429	26	A
1144344	reverse	SL1039	1143828	1144268	75	A
1156297	reverse	SL1051	1155321	1156241	55	A
1156332	reverse	SL1051	1155321	1156241	90	T
1162188	reverse	SL1058	1161545	1162141	46	G
1167924	reverse	SL1062	1163919	1167881	42	A
1171484	reverse	SL1064	1170638	1171492	-9	A
1172531	reverse	SL1065	1171598	1172479	51	G
1182286	reverse	SL1073	1182228	1182965	-680	A
1188216	reverse	SL1081	1187770	1188225	-10	G
1192739	reverse	SL1087	1192559	1194094	-1356	G
1198660	reverse	SL1091	1197388	1198602	57	A
1203703	reverse	SL1097	1202562	1203680	22	A
1204124	reverse	SL1098	1203793	1204050	73	G
1204115	reverse	SL1098	1203793	1204050	64	A
1206391	reverse	SL1101	1205807	1206367	23	A
1207166	reverse	SL1102	1206492	1207139	26	A
1213533	reverse	SL1109	1213188	1213481	51	A
1214257	reverse	SL1110	1213573	1214232	24	A
1228061	reverse	SL1122	1224496	1227699	361	G
1228095	reverse	SL1122	1224496	1227699	395	G
1253357	reverse	SL1150	1252693	1253328	28	A
1261080	reverse	SL1156	1260714	1261958	-879	C
1265806	reverse	SL1160	1264891	1265670	135	T
1276250	reverse	SL1169	1275542	1276216	33	A
1276239	reverse	SL1169	1275542	1276216	22	A
1287920	reverse	SL1182	1287685	1287897	22	G
1290674	reverse	STnc520	1290590	1290674	-1	G
1291605	reverse	SL1185	1290898	1291242	362	A
1295057	reverse	SL1189	1294301	1294831	225	G
1294997	reverse	SL1189	1294301	1294831	165	G
1306458	reverse	SL1202	1306147	1306395	62	G
1309937	reverse	RyhB2	1309727	1309937	-1	A
1311683	reverse	SL1213	1311289	1311636	46	G
1314455	reverse	SL1216	1313814	1314260	194	T
1316856	reverse	SL1218	1315138	1316631	224	A
1316658	reverse	SL1218	1315138	1316631	26	T
1320781	reverse	SL1220	1318681	1320615	165	A
1320607	reverse	SL1220	1318681	1320615	-9	A
1326695	reverse	SL1225	1325546	1326541	153	A
1326785	reverse	SL1225	1325546	1326541	243	G
1331677	reverse	SL1230	1329763	1331619	57	A
1336897	reverse	SL1234	1335489	1336832	64	T
1346874	reverse	SL1244	1345970	1346878	-5	A
1347835	reverse	SL1245	1346972	1347799	35	G
1351281	reverse	SL1250	1350908	1351672	-392	G
1359183	reverse	SL1256	1358456	1359055	127	G
1361476	reverse	SL1259	1360589	1361449	26	C
1365160	reverse	SL1263	1363971	1364930	229	A
1363997	reverse	SL1263	1363971	1364930	-934	G
1365578	reverse	SL1265	1365402	1366238	-661	A
1368311	reverse	SL1266	1366940	1368163	147	A
1383348	reverse	SL1281	1382251	1383297	50	A
1393672	reverse	SL1290	1393556	1394707	-1036	G
1394056	reverse	SL1290	1393556	1394707	-652	G
1401790	reverse	RprA	1401682	1401790	-1	A
1403154	reverse	SL1298	1401973	1403091	62	G
1416505	reverse	SL1311	1416231	1416467	37	G
1418419	reverse	SL1312	1416778	1418136	282	A
1432000	reverse	SL1323	1430980	1431939	60	A
1436769	reverse	SL1326	1433688	1436450	318	A
1436618	reverse	SL1326	1433688	1436450	167	G
1448790	reverse	STnc1220	1448718	1448790	-1	A
1453137	reverse	SL1349	1452543	1453844	-708	A
1465951	reverse	SL1362	1464772	1465797	153	T
1466899	reverse	SL1363	1466265	1466846	52	A
1467849	reverse	SL1364	1466973	1467827	21	G
1469228	reverse	SL1366	1468554	1469201	26	T
1469736	reverse	SL1367	1469302	1469709	26	A
1477733	reverse	SL1377	1477220	1477687	45	A
1477787	reverse	SL1377	1477220	1477687	99	A
1484900	reverse	SL1384	1483302	1484807	92	G
1491804	reverse	SL1391	1491200	1491781	22	G
1508895	reverse	SL1405	1508142	1508873	21	T
1518687	reverse	SL1414	1517822	1518643	43	G
1520858	reverse	SL1416	1519555	1520808	49	G
1538542	reverse	SL1433	1538160	1538501	40	G
1544717	reverse	SL1439	1544456	1544659	57	G
1546429	reverse	SL1441	1545656	1546402	26	A
1550213	reverse	SL1445	1550184	1550576	-364	A
1552539	reverse	SL1446	1551267	1552454	84	A
1568411	reverse	SL1466	1568155	1568898	-488	C
1576488	reverse	SL1472	1575173	1576459	28	G
1583310	reverse	SL1478	1582858	1583247	62	G
1583959	reverse	SL1480	1583692	1583940	18	A
1588785	reverse	SL1484	1587258	1588724	60	A
1600917	reverse	SL1492	1600411	1600740	176	G
1600805	reverse	SL1492	1600411	1600740	64	G
1601547	reverse	SL1493	1601090	1601521	25	T
1601322	reverse	SL1493	1601090	1601521	-200	T
1616249	reverse	SL1507	1616060	1617448	-1200	C
1627035	reverse	SL1514	1626357	1626989	45	G
1633879	reverse	SL1519	1632950	1633615	263	A
1635012	reverse	SL1520	1633949	1635019	-8	A
1636435	reverse	SL1523	1636167	1636400	34	A
1641378	reverse	SL1526	1640926	1643070	-1693	T
1647622	reverse	SL1530	1646807	1647577	44	G
1648679	reverse	SL1531	1648099	1648497	181	A
1648668	reverse	SL1531	1648099	1648497	170	A
1653082	reverse	SL1535	1652532	1653068	13	T
1655091	reverse	SL1537	1654391	1655059	31	T
1662282	reverse	STnc1120 (RyjB)	1662190	1662282	-1	G
1674401	reverse	SL1556	1672732	1674357	43	A
1677055	reverse	SL1560	1677004	1677720	-666	A
1677919	reverse	SL1560	1677004	1677720	198	G
1692136	reverse	SL1571	1688187	1692089	46	A
1702639	reverse	MicC	1702531	1702639	-1	G
1703838	reverse	SL1583	1703468	1703806	31	A
1706905	reverse	STnc580 (FnrS)	1706784	1706905	-1	G
1708009	reverse	SL1587	1707001	1707984	24	A
1713418	reverse	SL1593	1713132	1713386	31	A
1723055	reverse	SL1602	1722495	1723607	-553	G
1724823	reverse	SL1604	1724186	1724776	46	A
1730493	reverse	SL1609	1728851	1730464	28	G
1734604	reverse	SL1613	1733034	1734575	28	A
1737669	reverse	SL1616	1737327	1737641	27	G
1739313	reverse	SL1620	1738601	1739269	43	G
1746567	reverse	SL1627	1745836	1746543	23	G
1748413	reverse	SL1628	1747010	1748383	29	A
1759909	reverse	SL1641	1759544	1759852	56	C
1760789	reverse	SL1642	1760002	1760766	22	G
1760390	reverse	SL1642	1760002	1760766	-377	A
1764536	reverse	SL1644	1761608	1764283	252	A
1764333	reverse	SL1644	1761608	1764283	49	A
1766328	reverse	SL1645	1765260	1766234	93	A
1766390	reverse	SL1645	1765260	1766234	155	A
1769313	reverse	SL1646	1766645	1769242	70	T
1769603	reverse	SL1646	1766645	1769242	360	G
1769483	reverse	SL1646	1766645	1769242	240	G
1769512	reverse	SL1646	1766645	1769242	269	T
1773606	reverse	SL1651	1772657	1773532	73	C
1775159	reverse	SL1653	1774261	1775142	16	G
1785413	reverse	SL1663	1784746	1785384	28	G
1789691	reverse	STnc1270	1789368	1789691	-1	G
1803845	reverse	SL1681	1802856	1803473	371	A
1805641	reverse	SL1683	1804681	1805589	51	G
1807938	reverse	SL1685	1806896	1807801	136	G
1825001	reverse	SL1696	1823575	1824999	1	T
1832692	reverse	SL1705	1831307	1832563	128	A
1832601	reverse	SL1705	1831307	1832563	37	G
1837747	reverse	SL1710	1837416	1837694	52	A
1838994	reverse	SL1712	1838671	1839762	-769	C
1841236	reverse	SL1713	1839921	1841186	49	G
1853978	reverse	SL1725	1853698	1853952	25	G
1860877	reverse	SL1731	1859542	1860840	36	A
1860895	reverse	SL1731	1859542	1860840	54	C
1863494	reverse	SL1733	1862742	1863461	32	A
1866653	reverse	SL1737	1866419	1866592	60	G
1866947	reverse	SL1738	1866784	1866921	25	A
1866940	reverse	SL1738	1866784	1866921	18	A
1867098	reverse	SL1738	1866784	1866921	176	G
1868856	reverse	SL1741	1868521	1868853	2	A
1868859	reverse	SL1741	1868521	1868853	5	A
1876053	reverse	SL1749	1875330	1876025	27	T
1878675	reverse	SL1752	1878474	1878653	21	A
1881432	reverse	SL1755	1880944	1882308	-877	A
1893525	reverse	SL1767	1893337	1893480	44	G
1893528	reverse	SL1767	1893337	1893480	47	G
1893683	reverse	SL1767	1893337	1893480	202	A
1894435	reverse	SL1768	1894129	1894416	18	T
1894655	reverse	SL1769	1894487	1894630	24	A
1894752	reverse	SL1769	1894487	1894630	121	A
1896070	reverse	SL1771	1895239	1896030	39	T
1898571	reverse	SL1773	1897627	1898508	62	A
1901505	reverse	SL1775	1900770	1901456	48	G
1902148	reverse	SL1776	1901554	1902138	9	A
1902138	reverse	SL1776	1901554	1902138	-1	A
1909349	reverse	SL1783	1909131	1909295	53	G
1910324	reverse	SL1784	1909580	1910302	21	G
1919904	reverse	SL1797	1919657	1919839	64	A
1925723	reverse	SdsR	1925621	1925723	-1	G
1927512	reverse	SL1809	1927110	1927490	21	G
1929651	reverse	SL1813	1929373	1931424	-1774	A
1932768	reverse	SL1815	1932390	1932743	24	G
1933128	reverse	SL1816	1932811	1933101	26	A
1941769	reverse	SL1823	1941560	1942531	-763	A
1942565	reverse	SL1823	1941560	1942531	33	A
1944358	reverse	SL1825	1943983	1944984	-627	A
1954546	reverse	SL1836	1952678	1954450	95	C
1969025	reverse	SL1849	1967850	1969001	23	A
1974008	reverse	SL1854	1972323	1973984	23	A
1977502	reverse	SL1857	1976765	1977694	-193	A
1978737	reverse	SL1858	1977691	1978521	215	A
1979837	reverse	SL1860	1979284	1979634	202	G
1979990	reverse	SL1860	1979284	1979634	355	G
1980165	reverse	SL1860	1979284	1979634	530	A
1983117	reverse	SL1863	1982263	1983066	50	A
1987759	reverse	SL1869	1987502	1987741	17	T
1990014	reverse	SL1871	1989254	1989919	94	T
1990692	reverse	SL1872	1990157	1990462	229	G
1992661	reverse	SL1874	1992348	1992680	-20	C
1993962	reverse	SL1875	1993381	1993929	32	A
1995988	reverse	SL1876	1993986	1995818	169	A
1996514	reverse	SL1877	1995815	1996471	42	G
1998026	reverse	SL1879	1997226	1997948	77	A
2001700	reverse	SL1883	2000758	2001558	141	G
2003064	reverse	SL1885	2002315	2003034	29	A
2003051	reverse	SL1885	2002315	2003034	16	G
2006775	reverse	SL1888	2005226	2006713	61	A
2009321	reverse	SL1892	2009235	2010719	-1399	A
2013915	reverse	SL1897	2013576	2013890	24	G
2026302	reverse	DsrA	2026216	2026302	-1	C
2029398	reverse	SL1916	2029188	2029406	-9	G
2029431	reverse	SL1916	2029188	2029406	24	G
2030389	reverse	SL1917	2029450	2030361	27	C
2037150	reverse	SL1924	2036793	2037005	144	G
2064634	reverse	SL1958	2064488	2064847	-214	G
2064847	reverse	SL1958	2064488	2064847	-1	A
2070988	reverse	STnc1290	2070801	2070988	-1	G
2090510	reverse	SL1986	2089022	2090476	33	A
2091366	reverse	SL1987	2090672	2090998	367	G
2091482	reverse	SL1988	2090992	2091378	103	A
2094969	reverse	SL1991	2094011	2094940	28	A
2111918	reverse	SL2011	2110137	2111516	401	A
2111978	reverse	SL2011	2110137	2111516	461	G
2113116	reverse	SL2012	2112114	2112878	237	A
2131875	reverse	SL2035	2131363	2131698	176	G
2131704	reverse	SL2035	2131363	2131698	5	A
2131748	reverse	SL2035	2131363	2131698	49	A
2133618	reverse	SL2037	2133120	2133587	30	T
2138688	reverse	SL2041	2136390	2138666	21	A
2145102	reverse	SL2045	2143542	2144906	195	C
2144765	reverse	SL2045	2143542	2144906	-142	G
2155560	reverse	SL2056	2154547	2155530	29	A
2156959	reverse	SL2057	2155673	2156839	119	A
2170107	reverse	SL2067	2168641	2169954	152	G
2170683	reverse	SL2068	2169981	2171060	-378	A
2176466	reverse	SL2074	2175210	2176295	170	T
2177589	reverse	SL2075	2176672	2177694	-106	A
2205972	reverse	SL2099	2205274	2205915	56	G
2206164	reverse	SL2099	2205274	2205915	248	G
2222242	reverse	SL2107	2220853	2222256	-15	G
2231318	reverse	SL2115	2230832	2231167	150	A
2233801	reverse	SL2118	2232681	2233733	67	G
2237966	reverse	SL2122	2237195	2237941	24	A
2239713	reverse	SL2124	2238764	2239561	151	G
2241057	reverse	SL2126	2240548	2241555	-499	C
2243576	reverse	SL2127	2241571	2244060	-485	C
2242767	reverse	SL2127	2241571	2244060	-1294	A
2245953	reverse	SL2130	2245622	2245903	49	A
2253874	reverse	SL2137	2252176	2253861	12	G
2253887	reverse	SL2137	2252176	2253861	25	T
2253896	reverse	SL2137	2252176	2253861	34	G
2258750	reverse	SL2143	2257791	2258708	41	T
2283676	reverse	SL2166	2282680	2284200	-525	A
2285752	reverse	SL2167	2284334	2285332	419	G
2286904	reverse	SL2168	2285831	2286853	50	C
2288898	reverse	SL2170	2288160	2288828	69	A
2289036	reverse	SL2170	2288160	2288828	207	A
2290177	reverse	SL2172	2290004	2290393	-217	G
2292937	reverse	SL2175	2292902	2294224	-1288	A
2305167	reverse	SL2183	2303940	2305070	96	A
2319847	reverse	SL2197	2319464	2319808	38	A
2320037	reverse	STnc1340	2319956	2320037	-1	A
2322177	reverse	SL2199	2321417	2322112	64	A
2324836	reverse	SL2202	2324542	2325162	-327	A
2364373	reverse	SL2237	2363159	2364127	245	G
2364393	reverse	SL2237	2363159	2364127	265	T
2371344	reverse	SL2240	2368463	2371309	34	A
2374100	reverse	SL2241	2371427	2374063	36	C
2387789	reverse	SL2252	2386321	2387679	109	A
2387757	reverse	SL2252	2386321	2387679	77	A
2387768	reverse	SL2252	2386321	2387679	88	A
2400078	reverse	SL2263	2399492	2400139	-62	G
2401492	reverse	SL2265	2400783	2401388	103	G
2409317	reverse	SL2273	2409034	2409291	25	A
2415035	reverse	SL2278	2413342	2415012	22	A
2417431	reverse	SL2281	2416854	2417315	115	A
2437342	reverse	SL2297	2436771	2437214	127	A
2437519	reverse	SL2297	2436771	2437214	304	G
2439167	reverse	SL2299	2437841	2438779	387	C
2443562	reverse	SL2302	2441710	2443536	25	A
2445474	reverse	SL2305	2444860	2445315	158	A
2445867	reverse	SL2306	2445655	2446857	-991	A
2457310	reverse	SL2316	2456735	2457286	23	G
2461024	reverse	SL2321	2460634	2461341	-318	A
2463037	reverse	SL2323	2462207	2462989	47	A
2465749	reverse	SL2325	2464298	2464867	881	C
2465446	reverse	SL2325	2464298	2464867	578	G
2465078	reverse	SL2325	2464298	2464867	210	G
2474131	reverse	SL2332	2473607	2474095	35	G
2474515	reverse	SL2332	2473607	2474095	419	G
2474543	reverse	SL2332	2473607	2474095	447	T
2475333	reverse	SL2333	2474406	2475080	252	A
2477402	reverse	SL2335	2476406	2477320	81	A
2481240	reverse	SL2339	2480071	2481207	32	G
2483608	reverse	SL2341	2482309	2483487	120	T
2487588	reverse	SL2347	2486338	2487552	35	G
2495809	reverse	SL2356	2495127	2495612	196	A
2495742	reverse	SL2356	2495127	2495612	129	A
2496184	reverse	SL2357	2495821	2497968	-1785	A
2499785	reverse	SL2359	2499456	2499740	44	A
2501592	reverse	SL2361	2501479	2502234	-643	G
2502396	reverse	SL2361	2501479	2502234	161	A
2502361	reverse	SL2361	2501479	2502234	126	G
2503938	reverse	SL2363	2503771	2504709	-772	A
2503968	reverse	SL2363	2503771	2504709	-742	T
2509602	reverse	SL2366	2508217	2509410	191	A
2511814	reverse	SL2368	2511513	2511755	58	G
2515021	reverse	SL2370	2513721	2514959	61	G
2519783	reverse	SL2373	2518104	2519756	26	A
2522831	reverse	SL2376	2521435	2522676	154	G
2529352	reverse	SL2381	2527879	2529294	57	T
2539837	reverse	SL2391	2538804	2539790	46	G
2548307	reverse	SL2401	2548304	2548684	-378	T
2555147	reverse	SL2408	2554315	2555106	40	A
2556287	reverse	SL2409	2555344	2556243	43	A
2568592	reverse	SL2423	2567740	2568966	-375	A
2580110	reverse	SL2435	2577695	2579974	135	A
2599714	reverse	SL2449	2598826	2599689	24	A
2600760	reverse	SL2451	2600708	2601742	-983	A
2602661	reverse	SL2452	2601759	2602637	23	A
2608307	reverse	SL2459	2607576	2608301	5	G
2610419	reverse	SL2461	2609749	2610375	43	G
2613543	reverse	SL2464	2612653	2614719	-1177	A
2619781	reverse	SL2469	2619659	2619988	-208	A
2622279	reverse	SL2471	2620521	2622098	180	A
2641126	reverse	SL2477	2639591	2645188	-4063	G
2641465	reverse	SL2477	2639591	2645188	-3724	A
2650935	reverse	SL2482	2650764	2651942	-1008	T
2656287	reverse	SL2486	2655117	2656121	165	G
2657887	reverse	SL2487	2656413	2657579	307	T
2657720	reverse	SL2487	2656413	2657579	140	T
2658251	reverse	SL2488	2657786	2658217	33	T
2663029	reverse	SL2492	2660629	2663034	-6	T
2671900	reverse	SL2496	2671711	2672379	-480	T
2681209	reverse	SL2506	2680648	2681142	66	G
2682057	reverse	SL2507	2681302	2682033	23	A
2692714	reverse	SL2517	2691398	2692651	62	C
2692874	reverse	SL2517	2691398	2692651	222	G
2705564	reverse	GlmY	2705381	2705564	-1	A
2712984	reverse	SL2531	2712285	2712920	63	A
2716852	reverse	SL2535	2716192	2717058	-207	G
2723169	reverse	SL2543	2722544	2723224	-56	A
2726378	reverse	SL2545	2724489	2726288	89	A
2726431	reverse	SL2545	2724489	2726288	142	G
2729701	reverse	STnc1380	2729634	2729701	-1	G
2759717	reverse	IsrJ	2759646	2759717	-1	A
2760556	reverse	IsrK	2760480	2760556	-1	A
2762866	reverse	SL2582	2762220	2762822	43	A
2763482	reverse	SL2584	2763222	2763455	26	A
2768367	reverse	SL2592	2767785	2768207	159	A
2771060	reverse	STnc1400	2770951	2771060	-1	G
2779439	reverse	SL2603	2779159	2779809	-371	A
2780633	reverse	SL2604	2779841	2780416	216	G
2786777	reverse	SL2610	2786319	2786702	74	A
2805222	reverse	SL2620	2802529	2805102	119	T
2806652	reverse	SL2622	2805960	2806940	-289	A
2807198	reverse	SL2622	2805960	2806940	257	G
2807900	reverse	SL2623	2807072	2807809	90	G
2813009	reverse	SL2628	2811888	2812958	50	A
2817746	reverse	SL2633	2816803	2817798	-53	G
2828145	reverse	SL2649	2827828	2828076	68	G
2833403	reverse	SL2654	2832775	2833365	37	G
2837506	reverse	SL2659	2837046	2837522	-17	G
2851225	reverse	SL2662	2850307	2851716	-492	G
2854563	reverse	SL2664	2853901	2855064	-502	G
2878267	reverse	SL2695	2877245	2878222	44	G
2893332	reverse	SL2714	2892957	2893190	141	G
2894037	reverse	SL2715	2893177	2893725	311	A
2905149	reverse	SL2727	2904537	2905364	-216	G
2905391	reverse	SL2727	2904537	2905364	26	G
2908137	reverse	SL2729	2906066	2908135	1	A
2911253	reverse	SL2732	2910939	2911295	-43	A
2950709	reverse	SL2763	2949378	2950430	278	A
2952817	reverse	SL2765	2952171	2953067	-251	G
2954019	reverse	SL2767	2953789	2954802	-784	A
2968481	reverse	SL2780	2968276	2968434	46	A
2968491	reverse	SL2780	2968276	2968434	56	G
2970244	reverse	SL2783	2969801	2970202	41	G
2978239	reverse	SL2793	2977213	2978172	66	A
2977832	reverse	SL2793	2977213	2978172	-341	G
2992157	reverse	SL2805	2991566	2992132	24	T
2993839	reverse	SL2806	2993527	2993712	126	A
2996764	reverse	SL2807	2993947	2996577	186	A
2998545	reverse	SL2809	2997430	2998491	53	A
2998896	reverse	SL2809	2997430	2998491	404	G
3033456	reverse	SL2845	3032477	3033382	73	G
3040128	reverse	SL2854	3038918	3040096	31	A
3047036	reverse	SL2859	3046265	3046657	378	T
3054030	reverse	SL2865	3053474	3053971	58	A
3066639	reverse	SL2878	3065858	3066508	130	A
3089613	reverse	SL2903	3088055	3089047	565	T
3094425	reverse	SL2910	3094035	3094346	78	G
3108738	reverse	SL2923	3106052	3108715	22	A
3118715	reverse	SL2930	3118020	3118691	23	A
3121892	reverse	SL2932	3120208	3121845	46	G
3121895	reverse	SL2932	3120208	3121845	49	C
3123914	reverse	SL2935	3123641	3123931	-18	A
3127954	reverse	SL2938	3126629	3127924	29	G
3127205	reverse	SL2938	3126629	3127924	-720	C
3136195	reverse	SL2943	3134700	3136058	136	G
3138522	reverse	CsrB	3138160	3138522	-1	G
3155803	reverse	SL2961	3155320	3155715	87	C
3156154	reverse	SL2961	3155320	3155715	438	G
3157294	reverse	SL2963	3156998	3157225	68	G
3161277	reverse	SL2967	3160305	3161111	165	G
3162349	reverse	SL2968	3161221	3162318	30	G
3164124	reverse	SL2969	3162818	3164071	52	T
3184189	reverse	SL2982	3183630	3184160	28	A
3191670	reverse	OmrA	3191584	3191670	-1	C
3191870	reverse	OmrB	3191785	3191870	-1	C
3202320	reverse	SL2997	3201120	3202298	21	G
3205542	reverse	SL3001	3205245	3205517	24	T
3216531	reverse	SL3012	3216274	3216501	29	A
3219073	reverse	SL3014	3218295	3219053	19	G
3222606	reverse	SL3017	3221466	3222347	258	T
3227417	reverse	SL3023	3227122	3227388	28	G
3229430	reverse	SL3025	3228734	3229393	36	G
3229992	reverse	SL3026	3229557	3229868	123	A
3237510	reverse	SL3031	3236308	3237402	107	A
3242308	reverse	SL3035	3241702	3242280	27	A
3246185	reverse	SL3039	3245497	3246156	28	G
3250061	reverse	SL3043	3249144	3250004	56	G
3252809	reverse	SL3045	3251412	3252575	233	A
3253677	reverse	SL3046	3252597	3253643	33	C
3259345	reverse	SL3052	3257113	3259059	285	A
3261273	reverse	STnc750 (sRNA8)	3261185	3261273	-1	A
3268583	reverse	SL3060	3267800	3268549	33	A
3276099	reverse	SL3067	3275515	3276012	86	T
3287254	reverse	SL3081	3286184	3287230	23	A
3288770	reverse	SL3083	3288188	3288514	255	G
3289267	reverse	SL3084	3288514	3289233	33	T
3314756	reverse	SL3107	3313848	3314726	29	A
3322438	reverse	SL3112	3321322	3322380	57	G
3324993	reverse	SL3113	3323050	3324906	86	G
3334493	reverse	SL3124	3333347	3334465	27	C
3334610	reverse	SL3124	3333347	3334465	144	T
3336718	reverse	SL3126	3335027	3336670	47	G
3338319	reverse	SL3128	3337751	3338266	52	A
3338725	reverse	SL3128	3337751	3338266	458	A
3341528	reverse	SL3133	3340712	3341446	81	A
3346248	reverse	SL3139	3346109	3346936	-689	G
3349187	reverse	SL3141	3348632	3349087	99	A
3359957	reverse	SL3148	3357651	3359909	47	A
3366806	reverse	SL3156	3366586	3367167	-362	A
3368127	reverse	SL3157	3367167	3367994	132	A
3369078	reverse	SL3159	3368438	3369070	7	G
3373136	reverse	SL3163	3372861	3373691	-556	A
3373797	reverse	SL3163	3372861	3373691	105	A
3375382	reverse	SL3165	3375206	3377002	-1621	A
3379513	reverse	SL3168	3378556	3379209	303	G
3380271	reverse	SL3170	3380019	3380228	42	A
3383144	reverse	RygD	3383000	3383144	-1	A
3392599	reverse	SL3179	3392191	3392553	45	A
3394555	reverse	SL3182	3393519	3394532	22	A
3399685	reverse	SL3186	3399077	3399583	101	A
3399607	reverse	SL3186	3399077	3399583	23	T
3403103	reverse	SL3189	3401507	3403072	30	G
3403869	reverse	SL3190	3403460	3404980	-1112	A
3405023	reverse	SL3190	3403460	3404980	42	G
3416957	reverse	SL3200	3416565	3416948	8	T
3418509	reverse	SL3203	3418206	3418505	3	G
3434145	reverse	SL3217	3433178	3434116	28	G
3469617	reverse	SL3254	3468958	3469842	-226	G
3472237	reverse	SL3255	3469952	3472087	149	G
3472701	reverse	SL3256	3472329	3472598	102	G
3474351	reverse	SL3258	3473693	3474094	256	A
3479170	reverse	SL3261	3478548	3478970	199	A
3482973	reverse	SL3264	3482557	3482889	83	C
3484704	reverse	SL3265	3483112	3484449	254	A
3488083	reverse	SL3268	3486106	3488040	42	G
3488881	reverse	SL3269	3488144	3488770	110	A
3488647	reverse	SL3269	3488144	3488770	-124	A
3488837	reverse	SL3269	3488144	3488770	66	A
3490098	reverse	SL3271	3489346	3489822	275	A
3489968	reverse	SL3271	3489346	3489822	145	A
3493194	reverse	SL3274	3492823	3493833	-640	A
3494570	reverse	SL3276	3494195	3494506	63	C
3494863	reverse	SL3276	3494195	3494506	356	G
3501244	reverse	SL3285	3500363	3501175	68	A
3528294	reverse	SL3310	3527930	3529420	-1127	A
3531383	reverse	SL3312	3530564	3531355	27	G
3532755	reverse	SL3314	3531970	3532608	146	C
3534817	reverse	SL3317	3534231	3534659	157	G
3548003	reverse	SL3330	3547347	3547976	26	G
3549216	reverse	SL3331	3548096	3549034	181	G
3549079	reverse	SL3331	3548096	3549034	44	A
3551366	reverse	SL3335	3550976	3551248	117	A
3557323	reverse	SL3340	3555770	3557215	107	A
3563612	reverse	SL3343	3562726	3563319	292	A
3568305	reverse	SL3348	3566287	3568227	77	A
3567183	reverse	SL3348	3566287	3568227	-1045	T
3568396	reverse	SL3348	3566287	3568227	168	A
3580557	reverse	SL3361	3579346	3581445	-889	A
3585324	reverse	SL3364	3583693	3586806	-1483	A
3597329	reverse	SL3371	3596717	3597190	138	G
3600175	reverse	SL3375	3599942	3601231	-1057	A
3603415	reverse	SL3378	3603120	3603389	25	G
3607873	reverse	SL3387	3607509	3608840	-968	C
3608093	reverse	SL3387	3607509	3608840	-748	A
3612966	reverse	SL3397	3612521	3612892	73	G
3613194	reverse	SL3397	3612521	3612892	301	G
3618182	reverse	SL3408	3617701	3618012	169	G
3619355	reverse	SL3410	3618856	3619332	22	A
3624358	reverse	SL3415	3623817	3624191	166	G
3626287	reverse	SL3419	3625354	3626088	198	A
3627219	reverse	SL3420	3626353	3627171	47	C
3627445	reverse	SL3420	3626353	3627171	273	A
3628448	reverse	SL3422	3627797	3628387	60	A
3633424	reverse	STnc1590	3633247	3633424	-1	G
3634366	reverse	SL3428	3633608	3633919	446	A
3633948	reverse	SL3428	3633608	3633919	28	G
3636955	reverse	SL3432	3636416	3636820	134	T
3643312	reverse	SL3439	3642705	3643277	34	A
3664371	reverse	SL3454	3663746	3664267	103	C
3664647	reverse	SL3454	3663746	3664267	379	G
3674079	reverse	SL3463	3673903	3674571	-493	A
3681175	reverse	SL3468	3679779	3681014	160	G
3681947	reverse	SL3469	3681128	3681847	99	T
3681881	reverse	SL3469	3681128	3681847	33	A
3690211	reverse	SL3476	3689410	3690180	30	A
3701783	reverse	SL3484	3701493	3701753	29	G
3709944	reverse	SL3492	3709527	3709853	90	A
3713683	reverse	SL3495	3712162	3713721	-39	A
3729756	reverse	SL3505	3727417	3729603	152	G
3731222	reverse	SL3506	3729950	3731056	165	T
3739897	reverse	SL3515	3739737	3740708	-812	A
3749102	reverse	SL3523	3747683	3748999	102	A
3748983	reverse	SL3523	3747683	3748999	-17	G
3749864	reverse	SL3525	3749623	3749850	13	G
3758323	reverse	SL3533	3757249	3758103	219	G
3768099	reverse	SL3543	3767831	3768076	22	G
3770787	reverse	SL3546	3769545	3770762	24	A
3778332	reverse	STnc770 (sRNA6)	3778180	3778332	-1	A
3781919	reverse	SL3555	3781454	3781789	129	A
3782045	reverse	SL3555	3781454	3781789	255	A
3787362	reverse	SL3559	3785265	3787307	54	A
3808716	reverse	SL3576	3807909	3808676	39	G
3811534	reverse	SL3578	3809888	3811375	158	C
3812934	reverse	SL3579	3811595	3812881	52	G
3825895	reverse	SL3586	3825541	3825744	150	A
3837518	reverse	SL3596	3835747	3837303	214	A
3850584	reverse	SL3607	3849806	3850510	73	A
3851182	reverse	SL3608	3850667	3851248	-67	G
3856789	reverse	SL3613	3856026	3856736	52	G
3856814	reverse	SL3613	3856026	3856736	77	C
3859815	reverse	SL3618	3859524	3859811	3	G
3864111	reverse	SL3621	3863164	3864075	35	T
3864598	reverse	SL3622	3864214	3864516	81	G
3866073	reverse	SL3624	3865700	3866053	19	A
3871627	reverse	SL3628	3870706	3871530	96	G
3876749	reverse	SL3632	3875924	3876724	24	G
3878746	reverse	SL3635	3878452	3879384	-639	A
3890851	reverse	SL3645	3889288	3890826	24	G
3896135	reverse	SL3649	3895498	3896106	28	T
3910302	reverse	SL3659	3909652	3910842	-541	A
3912484	reverse	SL3661	3911447	3912451	32	A
3916370	reverse	SL3665	3915432	3916253	116	A
3917685	reverse	SL3667	3917350	3917817	-133	G
3917873	reverse	SL3667	3917350	3917817	55	G
3918668	reverse	SL3669	3918199	3918630	37	T
3923730	reverse	SL3673	3922668	3923702	27	G
3933003	reverse	SL3681	3932121	3932930	72	A
3940349	reverse	SL3689	3939173	3940207	141	A
3943917	reverse	SL3694	3943540	3943776	140	A
3962417	reverse	SL3712	3961133	3962338	78	G
3978504	reverse	SL3723	3976075	3978942	-439	G
3980446	reverse	SL3725	3979512	3980300	145	A
3981763	reverse	SL3726	3981153	3981833	-71	A
3982565	reverse	SL3727	3982062	3982541	23	A
3986780	reverse	SL3729	3985802	3986497	282	A
4006546	reverse	SL3751	4005752	4006495	50	G
4012484	reverse	SL3756	4011866	4012456	27	G
4015862	reverse	SL3759	4014903	4015823	38	A
4019149	reverse	SL3763	4019024	4019122	26	G
4027737	reverse	SL3771	4027170	4027700	36	A
4028501	reverse	SL3773	4028049	4028396	104	G
4030532	reverse	SL3774	4028840	4030501	30	A
4031741	reverse	SL3776	4031229	4031648	92	G
4047705	reverse	SL3791	4046645	4047685	19	T
4055359	reverse	SL3797	4054569	4055258	100	A
4066627	reverse	SL3805	4064938	4066338	288	T
4077413	reverse	SL3815	4076544	4077503	-91	A
4079476	reverse	SL3818	4079045	4080382	-907	G
4094761	reverse	SL3830	4094054	4094752	8	A
4101951	reverse	SL3839	4101487	4101867	83	G
4105942	reverse	SL3842	4105477	4105920	21	T
4127951	reverse	SL3858	4127090	4127938	12	G
4133361	reverse	SL3863	4132442	4133371	-11	A
4138802	reverse	SL3868	4137871	4138758	43	G
4140796	reverse	SL3870	4140489	4140770	25	A
4166239	reverse	SL3892	4165857	4166597	-359	A
4167675	reverse	SL3893	4166594	4167550	124	G
4167558	reverse	SL3893	4166594	4167550	7	A
4168728	reverse	SL3894	4167912	4170458	-1731	G
4168311	reverse	SL3894	4167912	4170458	-2148	A
4172436	reverse	SL3898	4172092	4172412	23	A
4182516	reverse	SL3909	4181608	4182492	23	A
4196164	reverse	SL3921	4195338	4196150	13	G
4205008	reverse	SL3931	4204469	4204957	50	G
4213086	reverse	SL3936	4210855	4213044	41	A
4227230	reverse	SL3946	4226273	4227181	48	T
4228939	reverse	SL3947	4227569	4230355	-1417	A
4231350	reverse	SL3948	4230690	4231289	60	A
4231558	reverse	SL3948	4230690	4231289	268	A
4261871	reverse	SL3977	4261530	4261841	29	A
4271529	reverse	SL3987	4270545	4271576	-48	T
4281372	reverse	SL3997	4280503	4281339	32	A
4291972	reverse	SL4008	4291184	4291882	89	G
4304723	reverse	SL4022	4303724	4304683	39	A
4311086	reverse	SL4029	4310847	4311611	-526	A
4313202	reverse	SL4031	4312583	4313179	22	A
4314585	reverse	SL4033	4313815	4314561	23	A
4318368	reverse	SL4036	4317309	4318154	213	G
4318230	reverse	SL4036	4317309	4318154	75	A
4319525	reverse	SL4038	4319014	4319499	25	T
4321215	reverse	SL4040	4320588	4321919	-705	C
4322519	reverse	SL4041	4321929	4322459	59	A
4324699	reverse	SL4043	4323619	4324644	54	G
4330947	reverse	SL4048	4330569	4330886	60	G
4331010	reverse	SL4048	4330569	4330886	123	T
4340911	reverse	SL4055	4339966	4340856	54	A
4348517	reverse	SL4060	4345929	4348430	86	A
4354610	reverse	SL4066	4353735	4354586	23	G
4356503	reverse	SL4068	4354747	4356480	22	A
4356601	reverse	SL4068	4354747	4356480	120	T
4364423	reverse	OxyS	4364305	4364423	-1	A
4366852	reverse	SL4075	4365418	4366818	33	T
4381150	reverse	SL4083	4380025	4380975	174	A
4404049	reverse	STnc1460	4403810	4404049	-1	G
4421992	reverse	SL4116	4421536	4421973	18	A
4429348	reverse	SL4122	4428500	4429324	23	A
4436006	reverse	SL4125	4435285	4435974	31	G
4437929	reverse	SL4129	4437634	4437906	22	A
4439006	reverse	SL4130	4438004	4438945	60	A
4448562	reverse	SL4141	4448208	4448570	-9	A
4461191	reverse	SL4156	4459759	4461108	82	G
4466108	reverse	SL4161	4465224	4467320	-1213	C
4471852	reverse	SL4166	4470620	4471819	32	G
4479928	reverse	SL4172	4477472	4479892	35	G
4480064	reverse	SL4172	4477472	4479892	171	G
4480016	reverse	SL4172	4477472	4479892	123	A
4497389	reverse	SL4190	4494505	4497330	58	G
4518159	reverse	SL4197	4503766	4520445	-2287	A
4524095	reverse	SL4200	4523673	4525274	-1180	G
4536984	reverse	SL4211	4535006	4536964	19	C
4546489	reverse	SL4220	4545776	4546387	101	T
4551857	reverse	SL4226	4551459	4551794	62	C
4557342	reverse	SL4230	4555676	4557319	22	A
4563505	reverse	SL4234	4562489	4563421	83	A
4563442	reverse	SL4234	4562489	4563421	20	A
4572840	reverse	SL4241	4571185	4572816	23	A
4582497	reverse	SL4251	4581462	4582337	159	A
4584953	reverse	SL4255	4584169	4584921	31	G
4590024	reverse	SL4261	4589642	4589989	34	T
4591543	reverse	SL4262	4590110	4591294	248	G
4593069	reverse	SL4263	4591526	4592962	106	A
4595144	reverse	SL4265	4593838	4595079	64	A
4594032	reverse	SL4265	4593838	4595079	-1048	G
4595123	reverse	SL4265	4593838	4595079	43	G
4601872	reverse	SL4274	4601237	4601824	47	G
4606448	reverse	SL4280	4604563	4606353	94	A
4615363	reverse	SL4286	4614219	4615295	67	T
4618974	reverse	SL4289	4617810	4618949	24	G
4642590	reverse	SL4312	4642267	4642596	-7	A
4650410	reverse	SL4322	4650348	4650623	-214	A
4654394	reverse	SL4329	4653657	4654292	101	A
4658743	reverse	SL4333	4657714	4658679	63	A
4662229	reverse	SL4336	4660140	4662083	145	T
4663689	reverse	SL4338	4663081	4663638	50	A
4675884	reverse	SL4347	4675322	4675852	31	A
4677113	reverse	SL4348	4676079	4677077	35	G
4681405	reverse	SL4351	4680006	4681439	-35	A
4725643	reverse	SL4392	4725524	4725625	17	A
4736104	reverse	SL4403	4735569	4736072	31	C
4747147	reverse	SL4412	4746376	4747596	-450	A
4774026	reverse	SL4429	4773248	4773973	52	G
4776588	reverse	SL4431	4776160	4776417	170	G
4783583	reverse	SL4438	4782409	4783422	160	A
4789052	reverse	SL4445	4788319	4788990	61	G
4792538	reverse	SL4447	4791267	4792538	-1	A
4794112	reverse	SL4448	4792625	4793866	245	G
4794931	reverse	SL4449	4794345	4794860	70	G
4796863	reverse	SL4453	4796855	4797556	-694	A
4822620	reverse	SL4472	4820282	4822474	145	A
4822656	reverse	SL4472	4820282	4822474	181	A
4850186	reverse	SL4500	4849469	4850089	96	A
4876955	reverse	SL4525	4875950	4876666	288	G
4877163	reverse	SL4525	4875950	4876666	496	A
148	forward	SL0001	169	255	20	A
139	forward	SL0001	169	255	29	A
2920	forward	SL0003	2801	3730	-120	A
7619	forward	SL0007	7665	8618	45	A
8703	forward	SL0008	8729	9319	25	A
9971	forward	SL0009	9376	9942	-596	G
11553	forward	SL0012	11593	13509	39	A
11479	forward	SL0012	11593	13509	113	A
17964	forward	SL0018	17867	19966	-98	A
28821	forward	SL0024	28425	29432	-397	G
38577	forward	SL0034	37103	38674	-1475	G
41629	forward	STnc1010	41629	41708	-1	A
52158	forward	SL0045	52649	52864	490	G
56528	forward	SL0048	56689	57189	160	A
60076	forward	SL0052	60164	61084	87	G
61807	forward	SL0054	61794	63413	-14	G
73932	forward	SL0065	74020	74841	87	C
75783	forward	SL0067	75883	77031	99	G
80468	forward	SL0069	80551	80946	82	A
94100	forward	SL0082	94134	94550	33	A
95102	forward	SL0083	94774	95064	-329	A
103692	forward	SL0092	103484	104473	-209	A
107850	forward	SL0094	105813	108173	-2038	A
121475	forward	SL0104	121643	122488	167	A
126895	forward	SL0109	126851	128509	-45	A
128577	forward	SgrS	128577	128808	-1	G
138281	forward	SL0118	138340	139344	58	G
139906	forward	SL0119	139950	140408	43	G
139679	forward	SL0119	139950	140408	270	G
152498	forward	SL0130	152614	153534	115	G
153123	forward	SL0131	153536	154366	412	T
156887	forward	SL0134	156938	157855	50	C
158081	forward	SL0135	158203	158631	121	G
164007	forward	SL0141	164057	165100	49	A
169327	forward	SL0146	169358	169921	30	G
175261	forward	SL0151	175320	176084	58	A
175252	forward	SL0151	175320	176084	67	T
180940	forward	SL0154	181011	182435	70	G
185745	forward	SL0159	185853	188450	107	G
189553	forward	SL0161	189599	189961	45	A
189389	forward	SL0161	189599	189961	209	A
193360	forward	SL0165	193400	194167	39	A
193196	forward	SL0165	193400	194167	203	G
201302	forward	SL0171	200812	201348	-491	A
200741	forward	SL0171	200812	201348	70	C
209257	forward	SL0179	209289	209729	31	A
209767	forward	SL0180	209791	211020	23	G
216735	forward	SL0187	216394	216849	-342	G
240111	forward	SL0205	240160	240504	48	A
241011	forward	SL0206	240605	241228	-407	A
242876	forward	SL0209	242841	244358	-36	G
249153	forward	SL0213	247947	249248	-1207	T
247971	forward	SL0213	247947	249248	-25	A
257086	forward	SL0220	257144	257701	57	A
257033	forward	SL0220	257144	257701	110	C
260604	forward	SL0224	260991	262343	386	C
266145	forward	SL0227	265401	266426	-745	G
266079	forward	SL0227	265401	266426	-679	A
274508	forward	SL0234	274178	275941	-331	A
278642	forward	SL0237	278747	279958	104	G
280665	forward	SL0240	280687	281232	21	C
281385	forward	SL0241	281229	281651	-157	A
288208	forward	SL0249	288235	288801	26	A
298160	forward	SL0253	298231	299010	70	A
298151	forward	SL0253	298231	299010	79	A
302111	forward	SL0257	302143	302865	31	A
301943	forward	SL0257	302143	302865	199	G
303348	forward	SL0259	303393	304124	44	A
303264	forward	SL0259	303393	304124	128	A
335662	forward	SL0286	332521	336123	-3142	A
339272	forward	SL0291	339522	339830	249	A
348004	forward	SL0300	348088	349035	83	A
347905	forward	SL0300	348088	349035	182	G
354728	forward	SL0306	354759	355337	30	G
357260	forward	SL0309	357278	358333	17	G
362099	forward	SL0313	362157	362615	57	A
362677	forward	SL0314	362704	363948	26	C
363987	forward	SL0315	364006	364407	18	T
370206	forward	SL0322	370217	370540	10	G
385054	forward	SL0336	385057	385821	2	T
385010	forward	SL0336	385057	385821	46	A
384440	forward	SL0336	385057	385821	616	A
387604	forward	SL0338	386594	388168	-1011	A
386135	forward	SL0338	386594	388168	458	G
388229	forward	SL0339	388268	389011	38	G
402753	forward	SL0352	402817	404775	63	T
407911	forward	SL0354	408034	408135	122	T
410957	forward	SL0358	410999	412003	41	G
415097	forward	SL0361	415162	415437	64	A
429665	forward	SL0371	429947	431065	281	G
432757	forward	SL0374	432788	433003	30	T
436396	forward	SL0378	436585	436851	188	A
436361	forward	SL0378	436585	436851	223	G
437138	forward	SL0379	437203	437523	64	A
440204	forward	SL0383	440331	440876	126	A
440880	forward	SL0384	440903	441094	22	T
441214	forward	SL0385	441345	442022	130	G
442066	forward	SL0386	442093	442377	26	A
450249	forward	SL0392	450281	450970	31	G
449889	forward	SL0392	450281	450970	391	G
452570	forward	SL0394	452744	454063	173	T
455137	forward	SL0395	454138	455508	-1000	A
453902	forward	SL0395	454138	455508	235	A
453849	forward	SL0395	454138	455508	288	G
460090	forward	SL0400	460307	461434	216	G
461285	forward	SL0401	461457	461789	171	G
466015	forward	SL0406	466047	466394	31	A
468850	forward	SL0409	468877	469326	26	T
468724	forward	SL0409	468877	469326	152	A
477272	forward	SL0419	477354	478802	81	C
489329	forward	SL0431	489742	491253	412	A
500450	forward	SL0440	500487	500804	36	G
500439	forward	SL0440	500487	500804	47	G
501010	forward	SL0441	501151	502449	140	G
502623	forward	SL0442	502696	503319	72	A
502595	forward	SL0442	502696	503319	100	A
504954	forward	SL0444	505028	507382	73	A
507535	forward	SL0445	507591	507863	55	G
507473	forward	SL0445	507591	507863	117	G
507992	forward	SL0446	508154	510025	161	T
522771	forward	SL0459	522843	523412	71	G
524149	forward	SL0461	524065	525615	-85	A
526128	forward	SL0463	526106	526246	-23	G
527341	forward	SL0465	526889	527440	-453	G
531989	forward	SL0469	531907	533100	-83	G
533197	forward	SL0470	533242	533895	44	A
533970	forward	SL0471	534014	537376	43	T
533698	forward	SL0471	534014	537376	315	A
539629	forward	SL0476	539730	540281	100	T
540358	forward	SL0477	540395	542323	36	T
542177	forward	SL0478	542369	542698	191	G
545487	forward	SL0481	545529	546173	41	G
546378	forward	SL0482	546402	547364	23	A
549958	forward	SL0485	549838	551514	-121	A
555450	forward	ChiX (MicM)	555450	555566	-1	A
570517	forward	SL0503	570600	571430	82	A
575431	forward	SL0508	575491	575973	59	A
589453	forward	SL0521	589468	590517	14	T
597731	forward	SL0528	597231	597953	-501	A
598589	forward	SL0530	598623	600008	33	A
603732	forward	SL0536	603618	604160	-115	G
603411	forward	SL0536	603618	604160	206	G
623659	forward	SL0556	623687	625081	27	C
630379	forward	SL0559	628818	631547	-1562	A
638338	forward	SL0569	638504	638845	165	T
641427	forward	SL0573	641046	643301	-382	G
660725	forward	SL0588	660762	662867	36	G
660661	forward	SL0588	660762	662867	100	A
666431	forward	SL0593	666130	667365	-302	A
669873	forward	SL0596	669937	670500	63	G
672379	forward	SL0598	672639	673199	259	G
691628	forward	SL0616	691643	692215	14	G
692360	forward	SL0617	692400	692612	39	C
693987	forward	SL0620	694061	694264	73	G
712984	forward	SL0639	712934	713887	-51	A
713869	forward	SL0640	713955	715883	85	A
715951	forward	SL0641	715976	716449	24	A
716827	forward	SL0642	716488	717483	-340	G
735443	forward	SL0660	735466	736641	22	A
742036	forward	SL0664	741103	742323	-934	A
744055	forward	SL0666	743542	744342	-514	G
748856	forward	SL0669	748945	750351	88	G
758466	forward	SL0679	758602	759144	135	A
773787	forward	SL0689	773872	774078	84	A
777411	forward	SL0692	777459	778202	47	G
781016	forward	SL0697	781039	781605	22	T
793221	forward	SL0710	793336	794127	114	A
797179	forward	SL0714	797403	797792	223	A
800770	forward	SL0718	801156	803957	385	A
807346	forward	RybD	807346	807429	-1	A
808685	forward	SL0722	808940	810508	254	A
808651	forward	SL0722	808940	810508	288	G
812318	forward	SL0726	812438	812842	119	G
840396	forward	SL0753	839835	840851	-562	A
844591	forward	SL0757	844511	844762	-81	A
844835	forward	SL0758	844929	845702	93	G
848123	forward	SL0762	848435	849430	311	A
851064	forward	SL0764	851095	852318	30	A
854135	forward	SL0767	854223	855908	87	C
863658	forward	SL0775	863688	865709	29	C
866177	forward	SL0776	866199	868496	21	G
869761	forward	SL0778	869893	870882	131	A
869676	forward	SL0778	869893	870882	216	A
878468	forward	SL0790	878496	878906	27	G
898762	forward	SL0808	898795	899310	32	T
898567	forward	SL0808	898795	899310	227	A
898557	forward	SL0808	898795	899310	237	A
916339	forward	SL0823	916410	917351	70	T
924314	forward	SL0829	924346	924729	31	G
928205	forward	SL0833	927981	929144	-225	G
932197	forward	SL0835	931284	932174	-914	A
932127	forward	SL0835	931284	932174	-844	T
934650	forward	SL0839	934758	935960	107	A
934578	forward	SL0839	934758	935960	179	A
937633	forward	SL0842	937756	938988	122	A
943723	forward	SL0847	943926	944303	202	A
945792	forward	SL0852	945821	946723	28	G
951804	forward	SL0858	951857	952330	52	A
961825	forward	SL0869	961904	962227	78	A
972361	forward	SL0878	972397	974055	35	A
974644	forward	SL0879	974052	975020	-593	A
993011	forward	SL0897	993279	993773	267	G
993819	forward	SL0898	993908	997993	88	A
1000128	forward	SL0901	1000359	1001651	230	A
1001754	forward	SL0902	1001888	1004332	133	G
1010548	forward	SL0909	1010628	1011587	79	A
1021524	forward	SL0917	1021561	1022244	36	G
1022255	forward	SL0918	1022358	1024031	102	A
1022222	forward	SL0918	1022358	1024031	135	G
1022078	forward	SL0918	1022358	1024031	279	G
1031023	forward	SL0924	1031052	1031234	28	A
1032162	forward	SL0926	1032188	1033081	25	A
1033933	forward	SL0928	1033973	1034776	39	T
1041469	forward	SL0932	1041587	1043428	117	A
1041436	forward	SL0932	1041587	1043428	150	G
1043457	forward	SL0933	1043688	1044236	230	C
1046189	forward	SL0935	1044973	1046163	-1217	A
1055773	forward	SL0942	1054795	1056087	-979	A
1055099	forward	SL0942	1054795	1056087	-305	G
1060741	forward	isrB-1	1060741	1060835	-1	G
1065267	forward	SL0956	1065290	1065580	22	A
1065141	forward	SL0956	1065290	1065580	148	G
1065845	forward	SL0957	1065872	1066105	26	A
1066471	forward	SL0958	1066521	1067123	49	A
1068926	forward	SL0962	1068940	1069257	13	A
1101248	forward	SL0997	1100463	1103075	-786	G
1100431	forward	SL0997	1100463	1103075	31	G
1104358	forward	SL0999	1104459	1105001	100	T
1116737	forward	SL1009	1116763	1117215	25	A
1119368	forward	SL1012	1119422	1120027	53	A
1131800	forward	SL1026	1131870	1132550	69	A
1136541	forward	SL1031	1136570	1136740	28	G
1138539	forward	SL1034	1138602	1139966	62	A
1156457	forward	SL1052	1156476	1156838	18	G
1159994	forward	SL1056	1160022	1161263	27	G
1162430	forward	SL1059	1162526	1162693	95	A
1168170	forward	SL1063	1168303	1169811	132	A
1170379	forward	SL1064	1170638	1171492	258	A
1170291	forward	SL1064	1170638	1171492	346	A
1172385	forward	SL1065	1171598	1172479	-788	G
1172766	forward	SL1066	1172764	1174260	-3	A
1183644	forward	SL1075	1183596	1184126	-49	A
1190000	forward	SL1085	1189629	1191116	-372	T
1189852	forward	SL1085	1189629	1191116	-224	A
1189626	forward	SL1085	1189629	1191116	2	G
1208607	forward	SL1104	1208648	1209232	40	A
1212289	forward	SL1107	1211105	1212679	-1185	G
1214363	forward	SL1111	1214389	1214805	25	T
1221586	forward	SL1120	1221610	1223271	23	A
1228273	forward	SL1123	1228273	1229232	-1	A
1229340	forward	SL1124	1229388	1230131	47	C
1231413	forward	SL1127	1231415	1231936	1	C
1232435	forward	SL1129	1232295	1233374	-141	A
1235748	forward	SL1132	1235365	1236099	-384	G
1235629	forward	SL1132	1235365	1236099	-265	A
1236163	forward	SL1133	1236255	1236491	91	A
1236152	forward	SL1133	1236255	1236491	102	A
1237924	forward	SL1135	1237942	1238751	17	G
1239531	forward	SL1137	1239766	1240407	234	T
1241892	forward	SL1139	1241419	1242216	-474	A
1246491	forward	SL1142	1246545	1246904	53	A
1249670	forward	SL1147	1249799	1250341	128	T
1249599	forward	SL1147	1249799	1250341	199	G
1253515	forward	SL1151	1253570	1253827	54	A
1258794	forward	SL1154	1258821	1260020	26	T
1262715	forward	SL1158	1262917	1263738	201	T
1269538	forward	SL1164	1269559	1270788	20	A
1269451	forward	SL1164	1269559	1270788	107	G
1275574	forward	SL1169	1275542	1276216	-33	G
1281123	forward	SL1176	1281238	1282488	114	G
1281075	forward	SL1176	1281238	1282488	162	A
1282751	forward	SL1177	1282936	1284060	184	A
1288546	forward	SL1184	1289191	1289661	644	G
1288534	forward	SL1184	1289191	1289661	656	A
1292720	forward	SL1187	1292369	1292836	-352	G
1292311	forward	SL1187	1292369	1292836	57	G
1303294	forward	SL1199	1303449	1304237	154	A
1304297	forward	SL1200	1304382	1304975	84	G
1305018	forward	SL1201	1305044	1305892	25	T
1306685	forward	SL1204	1306706	1307251	20	T
1307410	forward	SL1205	1307448	1308086	37	T
1309950	forward	SL1210	1309991	1310239	40	G
1310648	forward	SL1211	1310672	1310923	23	A
1313017	forward	SL1215	1313040	1313834	22	T
1320361	forward	SL1220	1318681	1320615	-1681	A
1320981	forward	SL1221	1321042	1321788	60	G
1326848	forward	SL1226	1326853	1327296	4	G
1326798	forward	SL1226	1326853	1327296	54	T
1337044	forward	SL1235	1337071	1337346	26	A
1338989	forward	SL1238	1339047	1340273	57	G
1345198	forward	SL1243	1345410	1345895	211	A
1345883	forward	STnc1640	1345883	1345970	-1	T
1347991	forward	SL1246	1348018	1348359	26	A
1348551	forward	SL1247	1348660	1348980	108	A
1356394	forward	SL1254	1356584	1356826	189	T
1363077	forward	SL1262	1363164	1363922	86	A
1365437	forward	SL1265	1365402	1366238	-36	A
1365294	forward	SL1265	1365402	1366238	107	A
1369915	forward	SL1267	1369055	1370983	-861	A
1368901	forward	SL1267	1369055	1370983	153	G
1370806	forward	SL1268	1371095	1371529	288	G
1375754	forward	SL1272	1373530	1375917	-2225	A
1375554	forward	SL1272	1373530	1375917	-2025	G
1375286	forward	SL1272	1373530	1375917	-1757	T
1379519	forward	SL1278	1379651	1380364	131	A
1384573	forward	SL1283	1384623	1387001	49	G
1395800	forward	SL1291	1394721	1396316	-1080	A
1403251	forward	SL1299	1403356	1406412	104	G
1406895	forward	SL1301	1406879	1407106	-17	G
1428115	forward	SL1320	1428201	1429979	85	A
1435601	forward	SL1326	1433688	1436450	-1914	T
1436851	forward	SL1327	1436851	1437252	-1	A
1468041	forward	SL1365	1468129	1468476	87	G
1471611	forward	SL1370	1471636	1471875	24	A
1471902	forward	SL1371	1471926	1472822	23	A
1476540	forward	SL1376	1476732	1477172	191	G
1479120	forward	SL1379	1479168	1479497	47	G
1480274	forward	SL1381	1480339	1481613	64	C
1482931	forward	SL1383	1482592	1483197	-340	A
1493211	forward	SL1394	1493233	1494273	21	A
1498969	forward	SL1398	1499039	1500685	69	A
1516822	forward	SL1412	1517104	1517466	281	G
1525331	forward	SL1421	1525377	1526525	45	A
1527167	forward	SL1422	1526525	1527172	-643	A
1534697	forward	SL1429	1533806	1536247	-892	G
1534664	forward	SL1429	1533806	1536247	-859	G
1548865	forward	SL1443	1548928	1549110	62	G
1550156	forward	SL1445	1550184	1550576	27	G
1550746	forward	STnc560 (MgrR)	1550746	1550844	-1	G
1561014	forward	SL1457	1561006	1561953	-9	G
1573409	forward	SL1470	1573323	1574114	-87	A
1588723	forward	SL1485	1588983	1589990	259	A
1602269	forward	SL1495	1602344	1602487	74	G
1611957	forward	SL1503	1611987	1613114	29	G
1611583	forward	SL1503	1611987	1613114	403	A
1615247	forward	SL1506	1615267	1615845	19	A
1626912	forward	SL1514	1626357	1626989	-556	A
1626457	forward	SL1514	1626357	1626989	-101	A
1636599	forward	SL1524	1636624	1637943	24	G
1643966	forward	SL1528	1643687	1645132	-280	C
1648981	forward	SL1532	1649034	1649984	52	A
1658617	forward	SL1542	1658651	1659769	33	A
1665395	forward	SL1550	1664695	1665897	-701	A
1671748	forward	SL1555	1671748	1672671	-1	A
1685719	forward	SL1568	1685743	1686405	23	G
1686526	forward	RydC	1686526	1686591	-1	C
1696792	forward	SL1577	1696882	1697871	89	A
1697954	forward	SL1578	1697982	1698392	27	G
1700304	forward	SL1581	1698978	1702502	-1327	A
1698914	forward	SL1581	1698978	1702502	63	A
1702962	forward	SL1582	1702984	1703418	21	G
1708850	forward	SL1588	1708130	1709284	-721	A
1710445	forward	SL1590	1710516	1711031	70	A
1711201	forward	SL1591	1711227	1711979	25	A
1712096	forward	SL1592	1712130	1713077	33	A
1713577	forward	SL1594	1713625	1714656	47	A
1730620	forward	SL1610	1730654	1731382	33	A
1732405	forward	SL1612	1732438	1732944	32	C
1740507	forward	SL1622	1740532	1742181	24	A
1748905	forward	SL1631	1748989	1749777	83	C
1748742	forward	SL1631	1748989	1749777	246	A
1750961	forward	SL1633	1751199	1753133	237	A
1755628	forward	SL1636	1755765	1756517	136	A
1755468	forward	SL1636	1755765	1756517	296	G
1756633	forward	SL1637	1756776	1756994	142	A
1760908	forward	SL1643	1760962	1761552	53	A
1765181	forward	SL1645	1765260	1766234	78	A
1769626	forward	SL1647	1769645	1769896	18	C
1782355	forward	SL1659	1782411	1782593	55	G
1786593	forward	SL1666	1786952	1787491	358	G
1787624	forward	SL1667	1787652	1788053	27	G
1791191	forward	SL1671	1791215	1791544	23	A
1798125	forward	SL1678	1798160	1798474	34	T
1799792	forward	SL1680	1799981	1802659	188	G
1804100	forward	SL1682	1804136	1804549	35	A
1807869	forward	SL1686	1807912	1808370	42	A
1825140	forward	SL1697	1825176	1825529	35	A
1824847	forward	SL1697	1825176	1825529	328	A
1832739	forward	SL1706	1832877	1833500	137	T
1834198	forward	SL1707	1833497	1834348	-702	G
1850367	forward	SL1723	1850384	1851709	16	A
1854093	forward	SL1726	1854121	1854855	27	A
1856620	forward	SL1729	1856662	1858395	41	G
1861118	forward	SL1732	1861169	1862695	50	G
1863633	forward	SL1734	1863681	1865225	47	T
1868880	forward	SL1742	1868940	1869647	59	T
1868867	forward	SL1742	1868940	1869647	72	A
1878093	forward	SL1751	1878124	1878468	30	A
1880893	forward	SL1755	1880944	1882308	50	A
1885987	forward	SL1759	1886101	1887069	113	G
1889505	forward	SL1763	1889712	1890278	206	G
1894039	forward	SL1768	1894129	1894416	89	G
1894764	forward	SL1770	1894788	1895027	23	A
1902155	forward	SL1777	1902180	1903463	24	A
1911654	forward	SL1786	1911711	1912187	56	A
1920693	forward	SL1799	1920747	1920947	53	A
1927601	forward	SL1810	1927622	1927852	20	G
1927927	forward	SL1811	1927960	1928616	32	A
1927904	forward	SL1811	1927960	1928616	55	G
1928621	forward	SL1812	1928640	1929338	18	T
1939895	forward	SL1822	1940045	1941487	149	T
1956180	forward	SL1839	1956209	1956604	28	G
1960107	forward	SL1844	1960164	1961897	56	C
1960052	forward	SL1844	1960164	1961897	111	G
1980387	forward	SL1861	1980421	1980849	33	A
1986360	forward	SL1867	1986384	1986719	23	A
1986920	forward	SL1868	1986959	1987456	38	A
1995580	forward	SL1876	1993986	1995818	-1595	A
1996885	forward	SL1878	1996935	1997159	49	C
2006938	forward	SL1889	2006970	2008373	31	A
2006916	forward	SL1889	2006970	2008373	53	C
2012935	forward	SL1896	2013070	2013456	134	A
2014021	forward	SL1898	2014107	2015789	85	G
2025955	forward	SL1913	2025980	2026207	24	G
2032362	forward	SL1920	2031897	2033327	-466	G
2040483	forward	SL1928	2040503	2041510	19	A
2071271	forward	STnc1300	2071271	2071409	-1	A
2072244	forward	SL1967	2072244	2072939	-1	A
2079892	forward	SL1977	2080066	2080863	173	G
2088048	forward	SL1983	2086387	2088117	-1662	A
2091057	forward	SL1988	2090992	2091378	-66	G
2091670	forward	SL1989	2091704	2091871	33	A
2094308	forward	SL1991	2094011	2094940	-298	G
2105835	forward	SL2005	2105475	2106248	-361	C
2114535	forward	SL2014	2114561	2114845	25	A
2132959	forward	STnc1650	2132959	2133102	-1	A
2134323	forward	SL2038	2133740	2134912	-584	T
2133760	forward	SL2038	2133740	2134912	-21	A
2139197	forward	SL2043	2139285	2141633	87	T
2141813	forward	SL2044	2141976	2143406	162	A
2147102	forward	STnc700	2147102	2147280	-1	A
2163079	forward	SL2062	2163008	2163952	-72	A
2201003	forward	SL2096	2201041	2202621	37	G
2206182	forward	SL2100	2206246	2209236	63	A
2211623	forward	RyeC	2211623	2211760	-1	G
2227325	forward	SL2112	2227400	2228761	74	C
2228847	forward	CyaR	2228847	2228932	-1	G
2233958	forward	SL2119	2233987	2235258	28	G
2253398	forward	SL2137	2252176	2253861	-1223	A
2254855	forward	SL2139	2254875	2254982	19	A
2275617	forward	SL2158	2275638	2276036	20	A
2277915	forward	SL2161	2277943	2278662	27	A
2287179	forward	SL2169	2287003	2288145	-177	A
2309209	forward	SL2189	2309225	2310211	15	A
2310222	forward	SL2190	2310241	2310960	18	G
2311317	forward	SL2191	2311374	2311946	56	G
2311208	forward	SL2191	2311374	2311946	165	G
2311148	forward	SL2191	2311374	2311946	225	T
2312222	forward	SL2192	2312272	2313828	49	A
2324073	forward	SL2201	2324149	2324433	75	G
2326350	forward	SL2204	2326377	2326604	26	C
2331777	forward	SL2209	2331729	2332172	-49	A
2340307	forward	SL2217	2338601	2340967	-1707	G
2342448	forward	IsrG	2342448	2342729	-1	G
2344341	forward	SL2222	2344418	2345065	76	G
2344271	forward	SL2222	2344418	2345065	146	G
2357730	forward	SL2232	2357775	2358269	44	A
2364629	forward	MicF	2364629	2364721	-1	G
2364867	forward	SL2238	2365024	2367693	156	A
2367508	forward	SL2239	2367710	2368360	201	G
2377467	forward	SL2244	2377254	2377949	-214	T
2378987	forward	SL2246	2379116	2381401	128	A
2387889	forward	SL2253	2387952	2389580	62	A
2392385	forward	SL2256	2392511	2393464	125	A
2396859	forward	SL2260	2395930	2397147	-930	C
2400290	forward	SL2264	2400313	2400738	22	C
2401611	forward	SL2266	2401669	2402826	57	A
2401520	forward	SL2266	2401669	2402826	148	G
2418328	forward	SL2283	2418359	2419360	30	A
2438450	forward	SL2299	2437841	2438779	-610	A
2440356	forward	SL2300	2439711	2440925	-646	G
2445430	forward	SL2306	2445655	2446857	224	G
2455419	forward	SL2314	2455099	2456118	-321	A
2455036	forward	SL2314	2455099	2456118	62	A
2457328	forward	SL2317	2457342	2457986	13	A
2458808	forward	SL2319	2458902	2459795	93	G
2470561	forward	SL2330	2470589	2472016	27	A
2476553	forward	SL2335	2476406	2477320	-148	A
2491777	forward	SL2352	2491429	2492253	-349	A
2500056	forward	SL2360	2500105	2501418	48	T
2500011	forward	SL2360	2500105	2501418	93	A
2502497	forward	SL2362	2502523	2503464	25	A
2512036	forward	SL2369	2512277	2513197	240	G
2516674	forward	SL2372	2516849	2518084	174	A
2519914	forward	SL2374	2519936	2520934	21	T
2519793	forward	SL2374	2519936	2520934	142	A
2521009	forward	SL2375	2521048	2521374	38	A
2522986	forward	SL2377	2523019	2524221	32	G
2522664	forward	SL2377	2523019	2524221	354	G
2527023	forward	SL2379	2527069	2527431	45	A
2539982	forward	SL2392	2540022	2540783	39	G
2540842	forward	SL2393	2540947	2541918	104	A
2542037	forward	SL2394	2542302	2542559	264	C
2541849	forward	SL2394	2542302	2542559	452	A
2544152	forward	SL2396	2544376	2544885	223	G
2552698	forward	SL2406	2552308	2553141	-391	G
2585409	forward	SL2441	2585584	2586882	174	A
2594747	forward	SL2445	2595050	2595406	302	A
2602755	forward	SL2453	2602783	2603355	27	T
2605583	forward	SL2457	2605687	2607150	103	G
2609519	forward	SL2460	2608372	2609661	-1148	A
2612560	forward	SL2464	2612653	2614719	92	G
2618831	forward	SL2468	2618927	2619118	95	G
2623760	forward	SL2473	2623795	2625144	34	A
2670596	forward	SL2495	2670622	2671464	25	A
2672651	forward	RyfA	2672651	2672944	-1	G
2682116	forward	SL2508	2682152	2682955	35	G
2688767	forward	SL2515	2688791	2690068	23	A
2694319	forward	SL2519	2694348	2695892	28	T
2697694	forward	SL2521	2697667	2699811	-28	A
2703276	forward	SL2525	2703125	2703889	-152	T
2710041	forward	SL2529	2710114	2711658	72	A
2718411	forward	SL2537	2718443	2719369	31	A
2726728	forward	SL2546	2726717	2728186	-12	A
2726687	forward	SL2546	2726717	2728186	29	T
2729133	forward	SL2547	2729043	2729588	-91	A
2752205	forward	SL2570	2751510	2753090	-696	C
2758129	forward	SL2577	2758157	2758843	27	A
2767704	forward	STnc1390	2767704	2767767	-1	G
2768448	forward	SL2593	2768366	2768833	-83	T
2786997	forward	SL2611	2787021	2787710	23	A
2789010	forward	SL2613	2789067	2789486	56	A
2790267	forward	SL2615	2790293	2792953	25	G
2792627	forward	SL2616	2793068	2794423	440	A
2808050	forward	SL2624	2808081	2808419	30	A
2808504	forward	sRNA3	2808504	2808645	-1	G
2824895	forward	SL2644	2824931	2825620	35	A
2829887	forward	SL2651	2829917	2830708	29	C
2833141	forward	SL2654	2832775	2833365	-367	A
2834416	forward	SL2656	2834452	2836113	35	A
2836213	forward	SL2657	2836262	2836600	48	A
2837604	forward	SL2660	2837672	2838154	67	T
2862878	forward	SL2674	2863004	2863726	125	A
2886760	forward	SL2708	2886920	2887495	159	G
2908611	forward	SL2730	2908638	2909921	26	A
2908594	forward	SL2730	2908638	2909921	43	A
2950920	forward	SL2764	2950949	2951878	28	A
2952143	forward	SL2765	2952171	2953067	27	T
2960357	forward	SL2773	2960408	2961394	50	A
2970828	forward	SL2784	2970901	2971350	72	A
2971872	forward	SL2786	2971885	2972223	12	T
2977814	forward	SL2793	2977213	2978172	-602	A
2983673	forward	SL2798	2983697	2984227	23	T
2983276	forward	SL2798	2983697	2984227	420	A
2989429	forward	MicA	2989429	2989502	-1	G
3003996	forward	SL2817	3004213	3004986	216	T
3003910	forward	SL2817	3004213	3004986	302	A
3039861	forward	SL2854	3038918	3040096	-944	G
3040377	forward	SL2855	3040412	3041341	34	A
3040110	forward	SL2855	3040412	3041341	301	G
3042084	forward	SL2856	3042432	3044093	347	A
3050747	forward	SL2862	3049331	3050362	-1417	G
3049772	forward	SL2862	3049331	3050362	-442	A
3065801	forward	SL2877	3064173	3065861	-1629	G
3066873	forward	SL2879	3066965	3067408	91	A
3067787	forward	SL2880	3067839	3068288	51	A
3098079	forward	SL2915	3098111	3099157	31	G
3109049	forward	SL2924	3109160	3110113	110	G
3139315	forward	SL2948	3139344	3140192	28	A
3140270	forward	SL2949	3140305	3141669	34	A
3142111	forward	SL2950	3142234	3143523	122	G
3141945	forward	SL2950	3142234	3143523	288	A
3148218	forward	SL2955	3148334	3149650	115	A
3156779	forward	GcvB	3156779	3156979	-1	A
3161794	forward	SL2968	3161221	3162318	-574	A
3184797	forward	SL2983	3184843	3185538	45	A
3185694	forward	SL2984	3185720	3186433	25	T
3186544	forward	SL2985	3186603	3186821	58	A
3186968	forward	SL2986	3187012	3188052	43	C
3206878	forward	SL3003	3206685	3207383	-194	A
3214779	forward	SL3010	3214534	3215070	-246	A
3217008	forward	SL3013	3217204	3218010	195	A
3218208	forward	SL3014	3218295	3219053	86	A
3219264	forward	IsrO	3219100	3219300	-165	C
3219264	forward	SL3015	3219318	3219863	53	C
3226124	forward	SL3021	3226154	3226675	29	A
3227326	forward	SL3023	3227122	3227388	-205	A
3227607	forward	SL3024	3227638	3228618	30	A
3229996	forward	SL3027	3230027	3231460	30	A
3240996	forward	SL3034	3240360	3241502	-637	A
3242325	forward	SL3036	3242447	3242776	121	T
3242809	forward	SsrS (6S)	3242594	3243000	-216	G
3242594	forward	SsrS (6S)	3242594	3243000	-1	A
3243669	forward	RygC	3243669	3243813	-1	G
3259317	forward	SL3053	3259380	3260138	62	A
3261695	forward	SL3055	3261364	3262254	-332	A
3272256	forward	SL3065	3272395	3273549	138	C
3278768	forward	SL3071	3278805	3279368	36	T
3285914	forward	SL3080	3285044	3286051	-871	A
3324162	forward	SL3113	3323050	3324906	-1113	A
3322951	forward	SL3113	3323050	3324906	98	A
3338306	forward	SL3129	3338358	3338768	51	A
3339257	forward	SL3131	3339283	3340167	25	G
3342990	forward	SL3136	3343025	3343684	34	A
3348578	forward	SL3141	3348632	3349087	53	G
3360754	forward	SL3149	3360020	3360886	-735	G
3369159	forward	SL3160	3369271	3370746	111	A
3369026	forward	SL3160	3369271	3370746	244	A
3370924	forward	SL3161	3370959	3371630	34	A
3378316	forward	SL3167	3377708	3378385	-609	T
3387253	forward	SL3174	3384745	3387588	-2509	A
3394625	forward	SL3183	3394760	3394975	134	C
3396578	forward	SL3184	3395211	3396956	-1368	A
3405375	forward	SL3191	3405500	3406789	124	A
3406917	forward	SL3192	3406960	3408978	42	T
3410407	forward	SL3194	3410332	3410778	-76	A
3410224	forward	SL3194	3410332	3410778	107	G
3411680	forward	SL3196	3411711	3412709	30	A
3414124	forward	SL3198	3414205	3415449	80	G
3413890	forward	SL3198	3414205	3415449	314	T
3415729	forward	SL3199	3415899	3416561	169	G
3415675	forward	SL3199	3415899	3416561	223	T
3420270	forward	SL3206	3420313	3420678	42	G
3422416	forward	SL3209	3422476	3422607	59	G
3439273	forward	SL3223	3439374	3440945	100	A
3458389	forward	SL3242	3458457	3458975	67	C
3488865	forward	SL3270	3488897	3489190	31	G
3491263	forward	SL3272	3490070	3491503	-1194	A
3490043	forward	SL3272	3490070	3491503	26	T
3494878	forward	SL3277	3494764	3495735	-115	A
3494690	forward	SL3277	3494764	3495735	73	A
3501323	forward	SL3286	3501430	3502365	106	T
3502831	forward	SL3287	3502379	3503365	-453	A
3503340	forward	SL3288	3503386	3503952	45	A
3511800	forward	ArcZ	3511800	3511917	-1	G
3513245	forward	SL3300	3511909	3514245	-1337	A
3515728	forward	SL3302	3515940	3520400	211	C
3536214	forward	SL3319	3536273	3536677	58	A
3549420	forward	SL3332	3549448	3549918	27	G
3571221	forward	SL3352	3571515	3571985	293	G
3576659	forward	SL3357	3576691	3577656	31	C
3585280	forward	SL3364	3583693	3586806	-1588	G
3584677	forward	SL3364	3583693	3586806	-985	A
3586972	forward	SL3365	3587042	3587263	69	G
3598379	forward	SL3373	3598418	3598927	38	A
3599554	forward	SL3375	3599942	3601231	387	T
3602747	forward	SL3377	3602771	3603184	23	G
3636956	forward	SL3433	3637128	3637760	171	G
3636761	forward	SL3433	3637128	3637760	366	G
3657390	forward	SL3447	3657451	3657621	60	G
3668127	forward	SL3460	3668148	3670724	20	G
3671486	forward	SL3462	3671706	3673838	219	A
3678058	forward	SL3467	3678085	3679704	26	A
3677946	forward	SL3467	3678085	3679704	138	G
3688697	forward	SL3475	3688460	3689374	-238	G
3690794	forward	SL3478	3690960	3691535	165	G
3691953	forward	SL3479	3691960	3693228	6	T
3698360	forward	SL3482	3698422	3701127	61	A
3710010	forward	SL3493	3710052	3711560	41	A
3724707	forward	SL3503	3724134	3725429	-574	A
3746499	forward	SL3521	3745890	3746735	-610	G
3755219	forward	SL3531	3755246	3755629	26	A
3766133	forward	SL3542	3766164	3767807	30	A
3768200	forward	SL3544	3768246	3768911	45	G
3768946	forward	SL3545	3768984	3769541	37	A
3771968	forward	SL3548	3771995	3772573	26	T
3782010	forward	SL3556	3782177	3782611	166	A
3782838	forward	SL3557	3782936	3784408	97	C
3796495	forward	SL3568	3796899	3798548	403	G
3808879	forward	SL3577	3808905	3809834	25	A
3825974	forward	SL3587	3825989	3827560	14	A
3828706	forward	SL3589	3827745	3829424	-962	T
3829661	forward	STnc710	3829661	3829727	-1	G
3850417	forward	SL3608	3850667	3851248	249	G
3854953	forward	SL3612	3855002	3855976	48	G
3857127	forward	SL3614	3857175	3857465	47	G
3857590	forward	SL3615	3857766	3857966	175	A
3889218	forward	SL3645	3889288	3890826	69	A
3910889	forward	SL3660	3910906	3911379	16	G
3920432	forward	SL3671	3920432	3921715	-1	A
3926582	forward	SL3676	3926630	3927562	47	A
3940628	forward	SL3690	3940718	3941929	89	A
3941836	forward	SL3691	3941938	3942417	101	A
3946282	forward	SL3698	3946599	3947195	316	A
3948808	forward	SL3701	3948835	3949698	26	A
3954370	forward	SL3706	3954412	3955035	41	G
3954907	forward	SL3707	3955090	3955365	182	C
3964052	forward	SL3714	3964078	3965787	25	A
3971297	forward	SL3718	3971323	3972860	25	A
3984355	forward	SL3728	3982856	3985582	-1500	A
4016076	forward	SL3760	4016148	4016933	71	A
4020938	forward	SL3766	4021002	4022186	63	G
4028476	forward	SL3773	4028049	4028396	-428	A
4031920	forward	SL3777	4031949	4032284	28	G
4031831	forward	SL3777	4031949	4032284	117	G
4041808	forward	SL3787	4041499	4042131	-310	A
4047534	forward	SL3792	4047765	4050500	230	A
4059229	forward	SL3801	4059254	4060150	24	A
4066903	forward	SL3806	4066999	4067139	95	C
4067676	forward	SL3809	4067739	4069385	62	T
4072456	forward	STnc400	4072456	4072529	-1	A
4077632	forward	SL3816	4077661	4078416	28	A
4077614	forward	SL3816	4077661	4078416	46	A
4106597	forward	SL3844	4106619	4107611	21	A
4112431	forward	SL3847	4110905	4112773	-1527	G
4110567	forward	SL3847	4110905	4112773	337	G
4112940	forward	SL3848	4112970	4113389	29	A
4116795	forward	SL3852	4116922	4117851	126	A
4116665	forward	SL3852	4116922	4117851	256	G
4127181	forward	SL3858	4127090	4127938	-92	G
4128009	forward	SL3859	4128045	4128383	35	A
4130247	forward	SL3861	4130518	4132164	270	A
4136531	forward	SL3865	4135385	4136929	-1147	G
4138854	forward	SL3869	4138922	4140397	67	A
4146500	forward	SL3875	4146381	4146710	-120	T
4146298	forward	SL3875	4146381	4146710	82	A
4146257	forward	SL3875	4146381	4146710	123	T
4146907	forward	SL3876	4147129	4148388	221	A
4146874	forward	SL3876	4147129	4148388	254	G
4148589	forward	SL3877	4148618	4149721	28	A
4162243	forward	SL3889	4160965	4162350	-1279	A
4160901	forward	SL3889	4160965	4162350	63	A
4163192	forward	GlmZ	4163192	4163399	-1	G
4167766	forward	SL3894	4167912	4170458	145	G
4167543	forward	SL3894	4167912	4170458	368	A
4173538	forward	SL3900	4173567	4173770	28	A
4174233	forward	SL3902	4174628	4175335	394	G
4179482	forward	SL3906	4179720	4180670	237	A
4179408	forward	SL3906	4179720	4180670	311	A
4179370	forward	SL3906	4179720	4180670	349	A
4184850	forward	SL3912	4184103	4185950	-748	A
4183994	forward	SL3912	4184103	4185950	108	A
4187336	forward	SL3915	4187405	4188421	68	A
4196368	forward	SL3922	4196409	4197170	40	T
4197021	forward	SL3923	4197310	4198740	288	A
4202015	forward	SL3927	4202049	4202303	33	C
4204548	forward	SL3931	4204469	4204957	-80	G
4204536	forward	SL3931	4204469	4204957	-68	A
4206023	forward	SL3932	4205143	4206621	-881	A
4205127	forward	SL3932	4205143	4206621	15	T
4214992	forward	SL3939	4215218	4216669	225	G
4224266	forward	SL3943	4224288	4224557	21	A
4224608	forward	SL3944	4224634	4225620	25	A
4227542	forward	SL3947	4227569	4230355	26	A
4230504	forward	Spf	4230504	4230613	-1	G
4231595	forward	CsrC	4231595	4231838	-1	A
4231866	forward	SL3950	4231905	4232420	38	A
4232507	forward	SL3951	4232609	4233982	101	A
4238588	forward	SL3955	4238822	4240645	233	A
4242860	forward	SL3958	4242294	4243535	-567	G
4249942	forward	SL3964	4248675	4250057	-1268	A
4263060	forward	SL3979	4263074	4263385	13	A
4269363	forward	SL3986	4269441	4270277	77	A
4274239	forward	SL3991	4274279	4274845	39	A
4280447	forward	SL3997	4280503	4281339	55	G
4281389	forward	SL3998	4281492	4282340	102	T
4291997	forward	SL4009	4292033	4292533	35	G
4293166	forward	SL4010	4292681	4293583	-486	A
4293687	forward	SL4011	4293768	4294730	80	A
4300238	forward	SL4017	4300459	4301181	220	G
4304876	forward	SL4023	4304939	4306474	62	A
4314199	forward	SL4033	4313815	4314561	-385	A
4318496	forward	SL4037	4318553	4318792	56	T
4318181	forward	SL4037	4318553	4318792	371	A
4327098	forward	SL4045	4327201	4327413	102	G
4327047	forward	SL4045	4327201	4327413	153	A
4328157	forward	IsrP	4328157	4328304	-1	G
4352248	forward	SL4064	4352515	4353393	266	G
4356616	forward	STnc1600	4356616	4356686	-1	G
4366954	forward	SL4076	4367017	4367652	62	G
4369304	forward	SL4079	4369506	4371392	201	G
4377980	forward	SL4081	4378003	4379031	22	G
4379660	forward	SL4082	4379028	4379990	-633	G
4384344	forward	SL4088	4384436	4384864	91	G
4385616	forward	SL4090	4385992	4386489	375	C
4386536	forward	SL4091	4386556	4386921	19	G
4396640	forward	SL4096	4396681	4397691	40	G
4398005	forward	SL4097	4398014	4398202	8	T
4403603	forward	SL4103	4401822	4403717	-1782	G
4405453	forward	SL4106	4405476	4406540	22	A
4405439	forward	SL4106	4405476	4406540	36	G
4407935	forward	SL4109	4408040	4408312	104	G
4433402	forward	SL4124	4433653	4435209	250	A
4433309	forward	SL4124	4433653	4435209	343	T
4446023	forward	SL4139	4445735	4447282	-289	G
4459159	forward	SL4155	4459279	4459626	119	G
4472124	forward	SL4167	4472172	4473281	47	A
4475966	forward	SL4170	4475990	4476487	23	A
4479883	forward	SL4173	4480063	4480431	179	A
4480512	forward	SL4174	4480540	4481148	27	A
4482710	forward	SL4176	4482781	4482993	70	A
4486745	forward	STnc880	4486745	4486823	-1	G
4491916	forward	SL4185	4491975	4492688	58	G
4497472	forward	SL4192	4497578	4498108	105	T
4517053	forward	SL4197	4503766	4520445	-13288	A
4516926	forward	SL4197	4503766	4520445	-13161	G
4514973	forward	SL4197	4503766	4520445	-11208	T
4522325	forward	SL4198	4520485	4522551	-1841	G
4528878	forward	SL4205	4528937	4530583	58	G
4537302	forward	SL4213	4537396	4538832	93	G
4544198	forward	SL4219	4544308	4545618	109	G
4552158	forward	SL4227	4552262	4553764	103	A
4558909	forward	SL4232	4558930	4559691	20	T
4560950	forward	SL4233	4559989	4562259	-962	G
4562397	forward	SL4234	4562489	4563421	91	A
4563667	forward	SL4235	4563690	4565045	22	G
4579411	forward	SL4247	4579464	4580369	52	G
4580485	forward	STnc440	4580485	4580565	-1	A
4582081	forward	SL4251	4581462	4582337	-620	A
4588732	forward	SL4260	4587963	4589666	-770	A
4591454	forward	SL4263	4591526	4592962	71	G
4595283	forward	SL4266	4595355	4595648	71	A
4597541	forward	SL4268	4597564	4597935	22	A
4600148	forward	SL4271	4600191	4600757	42	C
4599849	forward	SL4271	4600191	4600757	341	A
4600763	forward	SL4272	4600776	4600952	12	G
4601021	forward	SL4273	4601060	4601206	38	G
4620061	forward	SL4291	4620467	4620928	405	A
4624672	forward	SL4294	4624123	4625073	-550	G
4624269	forward	SL4294	4624123	4625073	-147	A
4625091	forward	SL4295	4625156	4625464	64	G
4626909	forward	SL4297	4627031	4628290	121	A
4629654	forward	SL4299	4629676	4630974	21	A
4629649	forward	SL4299	4629676	4630974	26	T
4631142	forward	SL4300	4631181	4631606	38	A
4655349	forward	SL4331	4655428	4656837	78	G
4661963	forward	SL4337	4662351	4663091	387	A
4663788	forward	SL4339	4663965	4664171	176	A
4666492	forward	SL4342	4666633	4668366	140	A
4672067	forward	SL4344	4672145	4672489	77	G
4671913	forward	SL4344	4672145	4672489	231	A
4679089	forward	SL4350	4679122	4679955	32	T
4720006	forward	SL4387	4720271	4722979	264	A
4726628	forward	SL4394	4726390	4727793	-239	G
4728866	forward	SL4396	4728965	4729897	98	G
4733471	forward	SL4400	4733500	4733916	28	A
4742951	forward	SL4409	4742937	4744037	-15	A
4742778	forward	SL4409	4742937	4744037	158	A
4776762	forward	SL4432	4776906	4777514	143	A
4783982	forward	SL4440	4784224	4784670	241	A
4794555	forward	SL4449	4794345	4794860	-211	A
4797957	forward	STnc1470	4797957	4798031	-1	A
4837141	forward	SL4490	4837493	4838566	351	A
4844729	forward	SL4496	4844288	4845511	-442	T
4850619	forward	SL4501	4850254	4850943	-366	T
4856247	forward	SL4507	4856362	4857621	114	A

## Sheet: PA14DistGenes
Pseudomonas aeruginosa UCBPP-PA14 Distance between pairs of genes
Data source: biocyc.org v20.5
Description of Columns
1.- Gene name
2.- Columns 2 and 3 contains the start and end gene coordinates
4.-Distance in nucleotides between the end of gene 1 and the beggining of gene 2
5.-Transcription-Direction (strand)
Gene name	Left	Right	Dist_Gen2	Strand
GI5K-681	727001	727720	0	forward
GI5K-732	767932	768366	0	forward
GI5K-2483	2655504	2656148	0	forward
GI5K-2708	2949029	2949247	0	forward
GI5K-3322	3682244	3682951	0	forward
GI5K-3699	4081597	4082310	0	forward
GI5K-2827	3117562	3119106	0	reverse
GI5K-2864	3156060	3157346	0	reverse
GI5K-3655	4037754	4039727	0	reverse
GI5K-4197	4604863	4605072	0	reverse
GI5K-4580	5033978	5035462	0	reverse
GI5K-4692	5150402	5150875	0	reverse
GI5K-5841	6408888	6410033	0	reverse
GI5K-88	101659	102504	1	forward
GI5K-200	224960	225679	1	forward
GI5K-205	229047	229928	1	forward
GI5K-446	487942	491082	1	forward
GI5K-513	565793	567169	1	forward
GI5K-540	592432	593829	1	forward
GI5K-618	670488	671162	1	forward
GI5K-640	690976	691509	1	forward
GI5K-667	714461	715066	1	forward
GI5K-957	1027770	1028399	1	forward
GI5K-1189	1265448	1266092	1	forward
GI5K-1270	1353499	1354680	1	forward
GI5K-1462	1566589	1567533	1	forward
GI5K-1664	1787554	1787859	1	forward
GI5K-1941	2090660	2091808	1	forward
GI5K-1979	2144768	2146291	1	forward
GI5K-2160	2333988	2335103	1	forward
GI5K-2456	2627215	2628495	1	forward
GI5K-2577	2761652	2762281	1	forward
GI5K-2924	3226187	3226903	1	forward
GI5K-3047	3366606	3367769	1	forward
GI5K-3255	3610769	3611455	1	forward
GI5K-3312	3670001	3671020	1	forward
GI5K-3635	4016053	4017318	1	forward
GI5K-4209	4614359	4614955	1	forward
GI5K-4240	4644946	4647591	1	forward
GI5K-4602	5055897	5056298	1	forward
GI5K-4702	5158354	5158818	1	forward
GI5K-5028	5508717	5509334	1	forward
GI5K-5164	5652314	5652877	1	forward
GI5K-5239	5733427	5734269	1	forward
GI5K-936	1002496	1003503	1	reverse
GI5K-1567	1694342	1694713	1	reverse
GI5K-1681	1806213	1807127	1	reverse
GI5K-1787	1935570	1935905	1	reverse
GI5K-1827	1970616	1971554	1	reverse
GI5K-1838	1979921	1980220	1	reverse
GI5K-2154	2327152	2328768	1	reverse
GI5K-2341	2500250	2500888	1	reverse
GI5K-2428	2595662	2596162	1	reverse
GI5K-2749	3021340	3023889	1	reverse
GI5K-2872	3164893	3166302	1	reverse
GI5K-3054	3374868	3376478	1	reverse
GI5K-3055	3376480	3377496	1	reverse
GI5K-3056	3377498	3378571	1	reverse
GI5K-3409	3772204	3773502	1	reverse
GI5K-3688	4069751	4070203	1	reverse
GI5K-3852	4248270	4248926	1	reverse
GI5K-4047	4453900	4454706	1	reverse
GI5K-4129	4541023	4542168	1	reverse
GI5K-4188	4596992	4597687	1	reverse
GI5K-4606	5060075	5060977	1	reverse
GI5K-5004	5483587	5484060	1	reverse
GI5K-5024	5503596	5504426	1	reverse
GI5K-5043	5521541	5522560	1	reverse
GI5K-5509	6049297	6049551	1	reverse
GI5K-5571	6111318	6113108	1	reverse
GI5K-5911	6482718	6483302	1	reverse
GI5K-5917	6487668	6489035	1	reverse
GI5K-262	291568	293184	2	forward
GI5K-660	705588	706283	2	forward
GI5K-721	763700	763891	2	forward
GI5K-730	767249	767749	2	forward
GI5K-779	830905	833181	2	forward
GI5K-927	994341	995087	2	forward
GI5K-1030	1102625	1103203	2	forward
GI5K-1105	1188951	1189691	2	forward
GI5K-1368	1465051	1465788	2	forward
GI5K-1385	1485522	1487150	2	forward
GI5K-1726	1867837	1868889	2	forward
GI5K-1731	1871326	1872060	2	forward
GI5K-3262	3618097	3619539	2	forward
GI5K-3433	3791591	3792244	2	forward
GI5K-4079	4490502	4491269	2	forward
GI5K-4111	4523092	4523589	2	forward
GI5K-4231	4635805	4638582	2	forward
GI5K-4753	5219801	5220481	2	forward
GI5K-4768	5236082	5237203	2	forward
GI5K-4909	5371711	5372538	2	forward
GI5K-5006	5484787	5485425	2	forward
GI5K-5145	5634070	5635119	2	forward
GI5K-5294	5789189	5789848	2	forward
GI5K-5504	6044551	6045627	2	forward
GI5K-5935	6505800	6506360	2	forward
GI5K-684	728625	729716	2	reverse
GI5K-912	982553	983818	2	reverse
GI5K-946	1013779	1014609	2	reverse
GI5K-1146	1226065	1226859	2	reverse
GI5K-1513	1629852	1630886	2	reverse
GI5K-1762	1906068	1907063	2	reverse
GI5K-2368	2525215	2526804	2	reverse
GI5K-2440	2609286	2610176	2	reverse
GI5K-2502	2678435	2679706	2	reverse
GI5K-2848	3137263	3139038	2	reverse
GI5K-2873	3166304	3167740	2	reverse
GI5K-2932	3233419	3234672	2	reverse
GI5K-3305	3661273	3661719	2	reverse
GI5K-3351	3714270	3715094	2	reverse
GI5K-3366	3730426	3733149	2	reverse
GI5K-3395	3759834	3760787	2	reverse
GI5K-3406	3771428	3771775	2	reverse
GI5K-3407	3771778	3772035	2	reverse
GI5K-3437	3794450	3796552	2	reverse
GI5K-3459	3815757	3816626	2	reverse
GI5K-3684	4066758	4067894	2	reverse
GI5K-3845	4241995	4242732	2	reverse
GI5K-3924	4330448	4332289	2	reverse
GI5K-3952	4352729	4352941	2	reverse
GI5K-4186	4595483	4596526	2	reverse
GI5K-4616	5072953	5073657	2	reverse
GI5K-4659	5118188	5119129	2	reverse
GI5K-4685	5144637	5145692	2	reverse
GI5K-4712	5166046	5167488	2	reverse
GI5K-4977	5450114	5451361	2	reverse
GI5K-5063	5545446	5545937	2	reverse
GI5K-5111	5597947	5598861	2	reverse
GI5K-5118	5604283	5604672	2	reverse
GI5K-519	572694	573518	3	forward
GI5K-729	766895	767245	3	forward
GI5K-731	767752	767928	3	forward
GI5K-1044	1117899	1119365	3	forward
GI5K-1131	1211981	1212916	3	forward
GI5K-1352	1447684	1449531	3	forward
GI5K-1378	1475049	1475825	3	forward
GI5K-1556	1685805	1686809	3	forward
GI5K-1605	1731056	1732027	3	forward
GI5K-1926	2075598	2076887	3	forward
GI5K-2041	2211845	2213182	3	forward
GI5K-2323	2471477	2473855	3	forward
GI5K-2718	2956615	2972064	3	forward
GI5K-2962	3264667	3265914	3	forward
GI5K-3035	3345406	3346047	3	forward
GI5K-3359	3722462	3723988	3	forward
GI5K-3503	3870059	3870844	3	forward
GI5K-4815	5278639	5280276	3	forward
GI5K-4852	5309848	5310105	3	forward
GI5K-4886	5346464	5346736	3	forward
GI5K-5334	5832989	5833804	3	forward
GI5K-5539	6077376	6077846	3	forward
GI5K-259	284712	285209	3	reverse
GI5K-295	328093	329082	3	reverse
GI5K-554	605219	606244	3	reverse
GI5K-1476	1584016	1585119	3	reverse
GI5K-1518	1635662	1638973	3	reverse
GI5K-1678	1803546	1804538	3	reverse
GI5K-1795	1941725	1942528	3	reverse
GI5K-1998	2164832	2165212	3	reverse
GI5K-2863	3154662	3156056	3	reverse
GI5K-2949	3248245	3249321	3	reverse
GI5K-3057	3378573	3380381	3	reverse
GI5K-3168	3498805	3499818	3	reverse
GI5K-3549	3920241	3922013	3	reverse
GI5K-3654	4037208	4037750	3	reverse
GI5K-3807	4202942	4203571	3	reverse
GI5K-3819	4215896	4216669	3	reverse
GI5K-3878	4279323	4280768	3	reverse
GI5K-3905	4309006	4309917	3	reverse
GI5K-3943	4347730	4349013	3	reverse
GI5K-3950	4352054	4352431	3	reverse
GI5K-3951	4352435	4352725	3	reverse
GI5K-4458	4881162	4882919	3	reverse
GI5K-4648	5105368	5106231	3	reverse
GI5K-4976	5449139	5450110	3	reverse
GI5K-5215	5704768	5705304	3	reverse
GI5K-5361	5868925	5869701	3	reverse
GI5K-5381	5891005	5892423	3	reverse
GI5K-5468	5998619	5999494	3	reverse
GI5K-5522	6062348	6062608	3	reverse
GI5K-5614	6158167	6159291	3	reverse
GI5K-5767	6326330	6327508	3	reverse
GI5K-5846	6414586	6416025	3	reverse
GI5K-1060	1139299	1139550	4	forward
GI5K-1314	1405645	1407273	4	forward
GI5K-1340	1433233	1434057	4	forward
GI5K-1345	1437645	1438748	4	forward
GI5K-1935	2086376	2087593	4	forward
GI5K-1949	2097863	2099302	4	forward
GI5K-2277	2441012	2441449	4	forward
GI5K-2391	2557190	2558917	4	forward
GI5K-2471	2640027	2641109	4	forward
GI5K-3107	3435469	3436767	4	forward
GI5K-3235	3579807	3580268	4	forward
GI5K-3269	3624953	3625195	4	forward
GI5K-3311	3668914	3669996	4	forward
GI5K-3333	3691732	3692229	4	forward
GI5K-4340	4751681	4752283	4	forward
GI5K-4637	5091554	5093650	4	forward
GI5K-4821	5285345	5286286	4	forward
GI5K-5027	5506940	5508712	4	forward
GI5K-5104	5590504	5593770	4	forward
GI5K-5900	6471293	6472150	4	forward
GI5K-29	30523	32076	4	reverse
GI5K-1116	1198334	1198426	4	reverse
GI5K-1414	1514941	1515834	4	reverse
GI5K-1485	1597097	1598179	4	reverse
GI5K-1932	2081960	2083936	4	reverse
GI5K-3126	3457302	3459128	4	reverse
GI5K-3424	3785397	3785726	4	reverse
GI5K-3944	4349017	4349373	4	reverse
GI5K-4051	4458125	4459546	4	reverse
GI5K-4061	4472946	4473548	4	reverse
GI5K-4381	4793615	4794280	4	reverse
GI5K-4484	4908122	4909066	4	reverse
GI5K-4725	5181541	5182332	4	reverse
GI5K-5489	6024110	6024712	4	reverse
GI5K-5606	6152213	6152695	4	reverse
GI5K-5646	6194758	6195504	4	reverse
GI5K-5738	6292401	6292802	4	reverse
GI5K-5799	6357284	6357460	4	reverse
GI5K-170	190557	191222	5	forward
GI5K-211	233582	233986	5	forward
GI5K-569	620189	621250	5	forward
GI5K-1104	1187404	1188945	5	forward
GI5K-1405	1505405	1506445	5	forward
GI5K-1976	2141913	2142431	5	forward
GI5K-2077	2245770	2246585	5	forward
GI5K-2223	2395469	2395541	5	forward
GI5K-3219	3563689	3564456	5	forward
GI5K-3358	3721917	3722456	5	forward
GI5K-4218	4621146	4621400	5	forward
GI5K-4803	5265022	5265750	5	forward
GI5K-177	196940	197542	5	reverse
GI5K-269	302683	303804	5	reverse
GI5K-2286	2446265	2446747	5	reverse
GI5K-2728	2997066	2998490	5	reverse
GI5K-2928	3230292	3231167	5	reverse
GI5K-3461	3817957	3818463	5	reverse
GI5K-3796	4191791	4192570	5	reverse
GI5K-4048	4454708	4455724	5	reverse
GI5K-4072	4484799	4485239	5	reverse
GI5K-4403	4819772	4820626	5	reverse
GI5K-4954	5422102	5423541	5	reverse
GI5K-5775	6335270	6336265	5	reverse
GI5K-1180	1256916	1258775	6	forward
GI5K-1257	1338564	1342460	6	forward
GI5K-1277	1361312	1361839	6	forward
GI5K-1936	2087598	2088044	6	forward
GI5K-2005	2171419	2171976	6	forward
GI5K-3310	3667060	3668907	6	forward
GI5K-4460	4884920	4885870	6	forward
GI5K-79	92696	94045	6	reverse
GI5K-1213	1288938	1289873	6	reverse
GI5K-1808	1954790	1955617	6	reverse
GI5K-2436	2605566	2606186	6	reverse
GI5K-2830	3120434	3121891	6	reverse
GI5K-3465	3821431	3824064	6	reverse
GI5K-3808	4203575	4205551	6	reverse
GI5K-5416	5943768	5945423	6	reverse
GI5K-5634	6183475	6184233	6	reverse
GI5K-435	477315	477821	7	forward
GI5K-537	591110	591637	7	forward
GI5K-659	705239	705580	7	forward
GI5K-971	1040070	1040426	7	forward
GI5K-1178	1256021	1256344	7	forward
GI5K-1302	1391688	1392113	7	forward
GI5K-2807	3087301	3088323	7	forward
GI5K-4116	4526078	4526572	7	forward
GI5K-4511	4946628	4947179	7	forward
GI5K-5377	5887049	5887699	7	forward
GI5K-5563	6104117	6104956	7	forward
GI5K-5706	6262382	6263590	7	forward
GI5K-5793	6355205	6355774	7	forward
GI5K-34	35926	36291	7	reverse
GI5K-75	84645	87743	7	reverse
GI5K-408	444738	445358	7	reverse
GI5K-770	819408	820520	7	reverse
GI5K-2419	2584180	2585640	7	reverse
GI5K-2842	3131350	3131865	7	reverse
GI5K-2885	3181060	3181524	7	reverse
GI5K-3690	4070706	4071677	7	reverse
GI5K-4101	4511775	4512887	7	reverse
GI5K-4500	4939140	4940105	7	reverse
GI5K-5342	5843612	5845876	7	reverse
GI5K-5607	6152700	6153884	7	reverse
GI5K-693	739340	740086	8	forward
GI5K-926	993817	994332	8	forward
GI5K-956	1026406	1027761	8	forward
GI5K-974	1042886	1043989	8	forward
GI5K-1324	1418127	1418678	8	forward
GI5K-1888	2034189	2036357	8	forward
GI5K-2646	2840489	2841007	8	forward
GI5K-3258	3613477	3614364	8	forward
GI5K-3970	4372229	4372396	8	forward
GI5K-4201	4608130	4609845	8	forward
GI5K-4519	4957850	4959079	8	forward
GI5K-4696	5153876	5154415	8	forward
GI5K-4817	5281595	5282128	8	forward
GI5K-4851	5309339	5309839	8	forward
GI5K-5238	5732966	5733418	8	forward
GI5K-5240	5734271	5734573	8	forward
GI5K-5824	6386825	6387274	8	forward
GI5K-174	193066	193608	8	reverse
GI5K-531	586014	586466	8	reverse
GI5K-889	954123	955508	8	reverse
GI5K-2184	2356910	2359402	8	reverse
GI5K-2266	2431760	2431978	8	reverse
GI5K-2875	3168837	3170045	8	reverse
GI5K-3137	3468329	3468979	8	reverse
GI5K-3402	3769290	3769910	8	reverse
GI5K-3414	3777824	3778237	8	reverse
GI5K-3415	3778246	3778491	8	reverse
GI5K-3419	3781116	3781622	8	reverse
GI5K-3508	3875737	3876543	8	reverse
GI5K-4226	4628589	4629941	8	reverse
GI5K-4407	4824497	4825447	8	reverse
GI5K-4488	4912050	4912796	8	reverse
GI5K-5184	5668330	5669259	8	reverse
GI5K-5325	5823071	5824498	8	reverse
GI5K-5465	5995985	5996854	8	reverse
GI5K-5467	5997741	5998610	8	reverse
GI5K-2	2056	3159	9	forward
GI5K-103	119248	120168	9	forward
GI5K-108	125293	126417	9	forward
GI5K-357	397086	397889	9	forward
GI5K-647	696289	698526	9	forward
GI5K-700	742681	743049	9	forward
GI5K-1626	1751065	1751787	9	forward
GI5K-1718	1858574	1860640	9	forward
GI5K-2454	2625132	2625758	9	forward
GI5K-2469	2637996	2639063	9	forward
GI5K-2470	2639073	2640017	9	forward
GI5K-2763	3039326	3039886	9	forward
GI5K-3139	3469644	3470309	9	forward
GI5K-4609	5063248	5064669	9	forward
GI5K-5018	5497966	5498925	9	forward
GI5K-76	87751	88479	9	reverse
GI5K-834	891558	893717	9	reverse
GI5K-937	1003505	1005307	9	reverse
GI5K-1686	1818107	1818994	9	reverse
GI5K-1818	1962803	1963696	9	reverse
GI5K-2051	2221269	2221577	9	reverse
GI5K-2172	2345654	2347231	9	reverse
GI5K-2366	2524349	2524582	9	reverse
GI5K-3129	3460525	3461277	9	reverse
GI5K-3331	3688547	3689929	9	reverse
GI5K-3420	3781631	3782515	9	reverse
GI5K-4183	4592795	4593619	9	reverse
GI5K-4385	4798998	4799303	9	reverse
GI5K-4482	4906701	4907687	9	reverse
GI5K-4531	4980026	4982794	9	reverse
GI5K-4538	4987566	4988477	9	reverse
GI5K-4541	4990630	4991814	9	reverse
GI5K-5076	5559001	5559894	9	reverse
GI5K-5121	5606850	5607701	9	reverse
GI5K-5608	6153892	6155226	9	reverse
GI5K-5739	6292807	6294033	9	reverse
GI5K-5957	6528228	6529100	9	reverse
GI5K-32	34645	35559	10	forward
GI5K-102	118146	119237	10	forward
GI5K-109	126427	128019	10	forward
GI5K-110	128030	128584	10	forward
GI5K-156	173624	174343	10	forward
GI5K-227	251329	252120	10	forward
GI5K-454	499715	501907	10	forward
GI5K-512	565534	565782	10	forward
GI5K-728	766351	766884	10	forward
GI5K-1169	1247545	1249407	10	forward
GI5K-1351	1446939	1447673	10	forward
GI5K-2479	2648473	2651127	10	forward
GI5K-2666	2885721	2886104	10	forward
GI5K-3565	3933756	3934109	10	forward
GI5K-3576	3947245	3948672	10	forward
GI5K-3868	4268057	4268722	10	forward
GI5K-3973	4373199	4375703	10	forward
GI5K-3974	4375714	4376205	10	forward
GI5K-4372	4781552	4782274	10	forward
GI5K-4419	4836101	4836571	10	forward
GI5K-4610	5064679	5065743	10	forward
GI5K-4848	5307321	5308010	10	forward
GI5K-4863	5327953	5328603	10	forward
GI5K-4870	5332854	5333210	10	forward
GI5K-5268	5759121	5759792	10	forward
GI5K-5541	6079343	6080527	10	forward
GI5K-5662	6214536	6214676	10	forward
GI5K-5663	6214687	6215934	10	forward
GI5K-5919	6490547	6491329	10	forward
GI5K-296	329086	329955	10	reverse
GI5K-412	448962	449555	10	reverse
GI5K-526	582560	583399	10	reverse
GI5K-854	913925	914317	10	reverse
GI5K-857	916840	917619	10	reverse
GI5K-951	1018515	1019336	10	reverse
GI5K-999	1067632	1068261	10	reverse
GI5K-1836	1978689	1979366	10	reverse
GI5K-1970	2126731	2127669	10	reverse
GI5K-2037	2204383	2205012	10	reverse
GI5K-2430	2598026	2598703	10	reverse
GI5K-2517	2693904	2697041	10	reverse
GI5K-2692	2928084	2929112	10	reverse
GI5K-2745	3017037	3017573	10	reverse
GI5K-2773	3050054	3051271	10	reverse
GI5K-2780	3059331	3060164	10	reverse
GI5K-2968	3271981	3275283	10	reverse
GI5K-2981	3286708	3287226	10	reverse
GI5K-3018	3326011	3326940	10	reverse
GI5K-3030	3339951	3340853	10	reverse
GI5K-3464	3819909	3821420	10	reverse
GI5K-3499	3865760	3867454	10	reverse
GI5K-3560	3928846	3929442	10	reverse
GI5K-3651	4035079	4035513	10	reverse
GI5K-3722	4108837	4109928	10	reverse
GI5K-3805	4201706	4202596	10	reverse
GI5K-4065	4477784	4478986	10	reverse
GI5K-4088	4499455	4499976	10	reverse
GI5K-4089	4499987	4501084	10	reverse
GI5K-4190	4598188	4599246	10	reverse
GI5K-4280	4685179	4686006	10	reverse
GI5K-4489	4912805	4913224	10	reverse
GI5K-4846	5305003	5305668	10	reverse
GI5K-4960	5434538	5434918	10	reverse
GI5K-5073	5556302	5557189	10	reverse
GI5K-5125	5610902	5611309	10	reverse
GI5K-5287	5780919	5782196	10	reverse
GI5K-5439	5972142	5973071	10	reverse
GI5K-5520	6060781	6061551	10	reverse
GI5K-284	319880	320317	11	forward
GI5K-432	467977	468852	11	forward
GI5K-442	484832	485401	11	forward
GI5K-655	702227	702721	11	forward
GI5K-715	760807	761106	11	forward
GI5K-719	762589	763275	11	forward
GI5K-727	765947	766339	11	forward
GI5K-1002	1072466	1074115	11	forward
GI5K-1064	1142001	1142996	11	forward
GI5K-1103	1183607	1187392	11	forward
GI5K-1904	2053723	2054265	11	forward
GI5K-1916	2063572	2064996	11	forward
GI5K-1960	2111927	2113024	11	forward
GI5K-2035	2202589	2203587	11	forward
GI5K-2045	2215846	2216454	11	forward
GI5K-2473	2642373	2643359	11	forward
GI5K-2576	2761188	2761640	11	forward
GI5K-2673	2895611	2897611	11	forward
GI5K-2719	2972068	2978637	11	forward
GI5K-3347	3708903	3711629	11	forward
GI5K-3522	3890090	3890605	11	forward
GI5K-3583	3954185	3955600	11	forward
GI5K-3693	4073921	4074508	11	forward
GI5K-4144	4556864	4557421	11	forward
GI5K-4217	4620901	4621134	11	forward
GI5K-4425	4841942	4843450	11	forward
GI5K-4741	5205656	5206666	11	forward
GI5K-5585	6125795	6128134	11	forward
GI5K-5	7018	7791	11	reverse
GI5K-413	449566	450387	11	reverse
GI5K-1153	1234554	1234922	11	reverse
GI5K-2032	2200343	2200828	11	reverse
GI5K-2206	2379170	2380234	11	reverse
GI5K-2423	2589403	2589903	11	reverse
GI5K-2424	2589915	2590463	11	reverse
GI5K-2833	3123481	3124173	11	reverse
GI5K-2847	3135932	3137251	11	reverse
GI5K-3417	3779064	3779951	11	reverse
GI5K-3498	3863676	3865748	11	reverse
GI5K-3548	3919522	3920229	11	reverse
GI5K-4066	4478997	4480106	11	reverse
GI5K-4266	4670212	4671234	11	reverse
GI5K-4666	5124709	5125116	11	reverse
GI5K-4680	5138285	5140186	11	reverse
GI5K-4691	5149743	5150390	11	reverse
GI5K-4920	5385469	5385933	11	reverse
GI5K-5128	5615034	5615684	11	reverse
GI5K-5345	5847418	5849307	11	reverse
GI5K-5418	5946586	5947104	11	reverse
GI5K-5701	6258966	6259121	11	reverse
GI5K-5952	6525415	6525951	11	reverse
GI5K-85	98900	99418	12	forward
GI5K-643	694084	695244	12	forward
GI5K-717	761956	762231	12	forward
GI5K-718	762244	762576	12	forward
GI5K-723	764184	764552	12	forward
GI5K-972	1040434	1040901	12	forward
GI5K-1101	1180817	1182112	12	forward
GI5K-1166	1244929	1245972	12	forward
GI5K-2054	2223532	2224215	12	forward
GI5K-2944	3246017	3246607	12	forward
GI5K-2959	3261616	3261921	12	forward
GI5K-3198	3539082	3540482	12	forward
GI5K-3254	3610001	3610756	12	forward
GI5K-3625	4005020	4006162	12	forward
GI5K-5146	5635122	5635982	12	forward
GI5K-94	110675	110959	12	reverse
GI5K-769	816306	819395	12	reverse
GI5K-810	864945	865931	12	reverse
GI5K-851	910888	911694	12	reverse
GI5K-1086	1167617	1168780	12	reverse
GI5K-1218	1294251	1295408	12	reverse
GI5K-1233	1310460	1310735	12	reverse
GI5K-1273	1357056	1358348	12	reverse
GI5K-1357	1453305	1453928	12	reverse
GI5K-1477	1585123	1586547	12	reverse
GI5K-2504	2680695	2681399	12	reverse
GI5K-2515	2692483	2693151	12	reverse
GI5K-2641	2835508	2836152	12	reverse
GI5K-2643	2837589	2838287	12	reverse
GI5K-2752	3026648	3027073	12	reverse
GI5K-3026	3334631	3335710	12	reverse
GI5K-3136	3467639	3468316	12	reverse
GI5K-3233	3578742	3579140	12	reverse
GI5K-3468	3827167	3827574	12	reverse
GI5K-3672	4052038	4052928	12	reverse
GI5K-3763	4159147	4159887	12	reverse
GI5K-3896	4301961	4302869	12	reverse
GI5K-3934	4338856	4339626	12	reverse
GI5K-3946	4350851	4351099	12	reverse
GI5K-3947	4351112	4351363	12	reverse
GI5K-4071	4484073	4484786	12	reverse
GI5K-4706	5161030	5161641	12	reverse
GI5K-4898	5359482	5359555	12	reverse
GI5K-5321	5818473	5819774	12	reverse
GI5K-5691	6247082	6247426	12	reverse
GI5K-654	701926	702213	13	forward
GI5K-713	759559	760194	13	forward
GI5K-725	764899	765438	13	forward
GI5K-1045	1119369	1120376	13	forward
GI5K-1994	2160174	2160797	13	forward
GI5K-2070	2240409	2240945	13	forward
GI5K-3102	3429132	3430739	13	forward
GI5K-3164	3494919	3495599	13	forward
GI5K-3715	4101481	4103082	13	forward
GI5K-4701	5158032	5158340	13	forward
GI5K-4804	5265756	5266289	13	forward
GI5K-4910	5372541	5373140	13	forward
GI5K-5447	5977936	5978184	13	forward
GI5K-5795	6356020	6356424	13	forward
GI5K-587	633343	633813	13	reverse
GI5K-761	807526	808362	13	reverse
GI5K-809	864434	864931	13	reverse
GI5K-824	880045	881136	13	reverse
GI5K-1480	1589681	1591108	13	reverse
GI5K-1677	1803293	1803532	13	reverse
GI5K-1997	2164495	2164818	13	reverse
GI5K-2835	3124687	3125970	13	reverse
GI5K-2971	3278336	3278578	13	reverse
GI5K-3212	3556129	3556965	13	reverse
GI5K-3277	3635217	3635714	13	reverse
GI5K-3361	3725032	3726219	13	reverse
GI5K-3389	3752461	3754605	13	reverse
GI5K-3517	3883374	3883715	13	reverse
GI5K-3648	4031588	4032688	13	reverse
GI5K-3812	4209501	4209887	13	reverse
GI5K-4022	4430999	4431751	13	reverse
GI5K-4045	4452098	4452541	13	reverse
GI5K-4262	4666044	4667042	13	reverse
GI5K-4263	4667056	4667346	13	reverse
GI5K-4272	4675997	4677109	13	reverse
GI5K-4307	4715309	4715614	13	reverse
GI5K-4542	4991824	4993074	13	reverse
GI5K-4653	5110888	5112234	13	reverse
GI5K-4897	5359396	5359468	13	reverse
GI5K-5117	5604187	5604269	13	reverse
GI5K-5782	6342074	6342748	13	reverse
GI5K-5946	6519059	6519568	13	reverse
GI5K-226	249935	251314	14	forward
GI5K-644	695257	695760	14	forward
GI5K-653	701654	701911	14	forward
GI5K-1290	1374776	1375219	14	forward
GI5K-1641	1762508	1763482	14	forward
GI5K-1721	1862506	1863060	14	forward
GI5K-2081	2249314	2249670	14	forward
GI5K-3275	3631084	3634788	14	forward
GI5K-3579	3950769	3952196	14	forward
GI5K-3711	4096997	4097956	14	forward
GI5K-4905	5365845	5367437	14	forward
GI5K-5280	5774457	5775512	14	forward
GI5K-5442	5974053	5974823	14	forward
GI5K-5534	6072697	6073470	14	forward
GI5K-5540	6077850	6079328	14	forward
GI5K-876	941975	942700	14	reverse
GI5K-1474	1581022	1582197	14	reverse
GI5K-2340	2493939	2500235	14	reverse
GI5K-2494	2668775	2669335	14	reverse
GI5K-2655	2870581	2873250	14	reverse
GI5K-4283	4688666	4689046	14	reverse
GI5K-4671	5128667	5129059	14	reverse
GI5K-4714	5168388	5172218	14	reverse
GI5K-5292	5787767	5788462	14	reverse
GI5K-5930	6501486	6502688	14	reverse
GI5K-208	231082	231888	15	forward
GI5K-445	486775	487926	15	forward
GI5K-1276	1361045	1361296	15	forward
GI5K-1369	1465791	1466348	15	forward
GI5K-1453	1554529	1556022	15	forward
GI5K-3097	3421686	3422876	15	forward
GI5K-3505	3872515	3873162	15	forward
GI5K-4720	5177262	5177549	15	forward
GI5K-5788	6348251	6348781	15	forward
GI5K-80	94052	95386	15	reverse
GI5K-337	374583	375617	15	reverse
GI5K-564	613682	614872	15	reverse
GI5K-586	632869	633327	15	reverse
GI5K-1096	1176243	1176992	15	reverse
GI5K-1781	1929042	1931366	15	reverse
GI5K-1866	2007828	2008763	15	reverse
GI5K-2887	3182434	3183162	15	reverse
GI5K-3458	3812214	3815741	15	reverse
GI5K-3737	4127099	4127515	15	reverse
GI5K-4127	4539063	4540049	15	reverse
GI5K-4181	4591238	4591912	15	reverse
GI5K-5482	6018152	6019090	15	reverse
GI5K-5752	6306130	6306963	15	reverse
GI5K-5827	6389416	6391239	15	reverse
GI5K-5882	6452959	6453837	15	reverse
GI5K-5944	6516367	6518202	15	reverse
GI5K-716	761118	761939	16	forward
GI5K-736	770346	770735	16	forward
GI5K-743	778276	779664	16	forward
GI5K-1929	2078376	2079881	16	forward
GI5K-2808	3088331	3089179	16	forward
GI5K-3003	3310576	3311004	16	forward
GI5K-3340	3699817	3701025	16	forward
GI5K-4320	4730156	4732348	16	forward
GI5K-4347	4758490	4758936	16	forward
GI5K-5011	5488704	5489492	16	forward
GI5K-5241	5734582	5735100	16	forward
GI5K-5708	6264129	6266693	16	forward
GI5K-30	32081	33004	16	reverse
GI5K-678	724269	725237	16	reverse
GI5K-1261	1345181	1347709	16	reverse
GI5K-1263	1348745	1349836	16	reverse
GI5K-1611	1736789	1737325	16	reverse
GI5K-1909	2057398	2058144	16	reverse
GI5K-2003	2169708	2170640	16	reverse
GI5K-2354	2511265	2511603	16	reverse
GI5K-2628	2823512	2823706	16	reverse
GI5K-2803	3084472	3085272	16	reverse
GI5K-3948	4351376	4351468	16	reverse
GI5K-4191	4599257	4599862	16	reverse
GI5K-4273	4677123	4677821	16	reverse
GI5K-5067	5549104	5549883	16	reverse
GI5K-5120	5605496	5606833	16	reverse
GI5K-5890	6461404	6462093	16	reverse
GI5K-5955	6526798	6527667	16	reverse
GI5K-552	603247	604536	17	forward
GI5K-1184	1260046	1261185	17	forward
GI5K-1239	1313291	1314076	17	forward
GI5K-1589	1715757	1716758	17	forward
GI5K-1859	2001615	2002331	17	forward
GI5K-2318	2467219	2469141	17	forward
GI5K-2560	2740053	2740820	17	forward
GI5K-2757	3030453	3031784	17	forward
GI5K-3618	3996050	3996565	17	forward
GI5K-3986	4389721	4390524	17	forward
GI5K-4299	4706093	4706881	17	forward
GI5K-4869	5332597	5332836	17	forward
GI5K-4881	5341788	5342726	17	forward
GI5K-5221	5712956	5713426	17	forward
GI5K-839	898045	898251	17	reverse
GI5K-852	911707	912510	17	reverse
GI5K-911	982017	982535	17	reverse
GI5K-1231	1308320	1308685	17	reverse
GI5K-1363	1457967	1459175	17	reverse
GI5K-1536	1658658	1659200	17	reverse
GI5K-1568	1694715	1695275	17	reverse
GI5K-2615	2809895	2810350	17	reverse
GI5K-2772	3048648	3050036	17	reverse
GI5K-2858	3148916	3149791	17	reverse
GI5K-2984	3287787	3290309	17	reverse
GI5K-3462	3818469	3819662	17	reverse
GI5K-3775	4168546	4169769	17	reverse
GI5K-4142	4554594	4555784	17	reverse
GI5K-4596	5048511	5050811	17	reverse
GI5K-4687	5147143	5147778	17	reverse
GI5K-5025	5504428	5505510	17	reverse
GI5K-5626	6174599	6176809	17	reverse
GI5K-735	769971	770327	18	forward
GI5K-924	992358	992837	18	forward
GI5K-1187	1262998	1264113	18	forward
GI5K-1294	1378878	1384118	18	forward
GI5K-1338	1431928	1432275	18	forward
GI5K-1729	1870142	1870456	18	forward
GI5K-1956	2104434	2105234	18	forward
GI5K-3120	3451794	3452072	18	forward
GI5K-3220	3564462	3565631	18	forward
GI5K-3712	4097971	4098390	18	forward
GI5K-5010	5488143	5488685	18	forward
GI5K-5550	6089362	6090357	18	forward
GI5K-5655	6207985	6208260	18	forward
GI5K-486	540138	540758	18	reverse
GI5K-940	1007379	1009679	18	reverse
GI5K-1410	1512199	1512420	18	reverse
GI5K-2310	2461821	2462339	18	reverse
GI5K-2600	2794984	2796006	18	reverse
GI5K-2850	3139925	3140911	18	reverse
GI5K-4064	4475714	4477765	18	reverse
GI5K-4271	4675214	4675978	18	reverse
GI5K-4705	5160079	5161011	18	reverse
GI5K-5481	6017336	6018133	18	reverse
GI5K-5951	6523852	6525396	18	reverse
GI5K-5958	6529110	6529898	18	reverse
GI5K-724	764565	764879	19	forward
GI5K-963	1032325	1033035	19	forward
GI5K-1388	1489398	1489682	19	forward
GI5K-1751	1896332	1896404	19	forward
GI5K-1943	2092473	2092545	19	forward
GI5K-2559	2738366	2740033	19	forward
GI5K-2813	3095748	3096767	19	forward
GI5K-5665	6216806	6217507	19	forward
GI5K-176	195871	196920	19	reverse
GI5K-2380	2538496	2539410	19	reverse
GI5K-2982	3287237	3287476	19	reverse
GI5K-3362	3726233	3727831	19	reverse
GI5K-3676	4057392	4058180	19	reverse
GI5K-3931	4336875	4337537	19	reverse
GI5K-4621	5077330	5077659	19	reverse
GI5K-5127	5611793	5615014	19	reverse
GI5K-5331	5829348	5830391	19	reverse
GI5K-5753	6306979	6308655	19	reverse
GI5K-1561	1690298	1691446	20	forward
GI5K-1625	1750250	1751044	20	forward
GI5K-2015	2180121	2181506	20	forward
GI5K-2099	2270442	2271455	20	forward
GI5K-3104	3431547	3433514	20	forward
GI5K-3646	4028906	4030144	20	forward
GI5K-4439	4854862	4855677	20	forward
GI5K-5049	5529629	5530636	20	forward
GI5K-5862	6429771	6431075	20	forward
GI5K-1094	1174918	1175304	20	reverse
GI5K-1478	1586560	1588191	20	reverse
GI5K-2116	2287689	2288456	20	reverse
GI5K-2152	2325060	2325854	20	reverse
GI5K-4573	5028215	5028523	20	reverse
GI5K-4688	5147796	5149061	20	reverse
GI5K-5357	5862849	5864009	20	reverse
GI5K-5692	6247439	6247630	20	reverse
GI5K-5716	6273680	6274297	20	reverse
GI5K-635	688080	688529	21	forward
GI5K-1922	2070083	2072857	21	forward
GI5K-2284	2444914	2445693	21	forward
GI5K-3313	3671022	3672632	21	forward
GI5K-4819	5283717	5284796	21	forward
GI5K-5553	6093086	6094534	21	forward
GI5K-1456	1558980	1559993	21	reverse
GI5K-2107	2278687	2279646	21	reverse
GI5K-2620	2814154	2817342	21	reverse
GI5K-2889	3184999	3186315	21	reverse
GI5K-2998	3304080	3305528	21	reverse
GI5K-3170	3500844	3502376	21	reverse
GI5K-3758	4152349	4152822	21	reverse
GI5K-4647	5104093	5105346	21	reverse
GI5K-5308	5807061	5807507	21	reverse
GI5K-5875	6445141	6445608	21	reverse
GI5K-139	153952	155049	22	forward
GI5K-225	248614	249912	22	forward
GI5K-233	257439	258482	22	forward
GI5K-353	392268	392747	22	forward
GI5K-696	741058	741128	22	forward
GI5K-737	770752	771372	22	forward
GI5K-970	1039403	1040047	22	forward
GI5K-1432	1533277	1534809	22	forward
GI5K-1651	1774674	1775732	22	forward
GI5K-2073	2242261	2243199	22	forward
GI5K-2546	2726001	2727038	22	forward
GI5K-3268	3623926	3624930	22	forward
GI5K-760	806856	807503	22	reverse
GI5K-799	853407	854207	22	reverse
GI5K-827	883311	884285	22	reverse
GI5K-1120	1200752	1201879	22	reverse
GI5K-2387	2552900	2553829	22	reverse
GI5K-2725	2992515	2993798	22	reverse
GI5K-2754	3027657	3029141	22	reverse
GI5K-2778	3056681	3058156	22	reverse
GI5K-2970	3277432	3278313	22	reverse
GI5K-3211	3555459	3556106	22	reverse
GI5K-3386	3749019	3750017	22	reverse
GI5K-3770	4164624	4165730	22	reverse
GI5K-4049	4455730	4457526	22	reverse
GI5K-4054	4462626	4462922	22	reverse
GI5K-4187	4596529	4596969	22	reverse
GI5K-4536	4986525	4986809	22	reverse
GI5K-5275	5767227	5768696	22	reverse
GI5K-5354	5857766	5858947	22	reverse
GI5K-5569	6109662	6110105	22	reverse
GI5K-722	763894	764160	23	forward
GI5K-1849	1989608	1990336	23	forward
GI5K-2320	2469754	2469948	23	forward
GI5K-5147	5635995	5636660	23	forward
GI5K-5220	5712489	5712932	23	forward
GI5K-422	459425	460429	23	reverse
GI5K-1014	1085222	1085629	23	reverse
GI5K-3087	3413625	3413924	23	reverse
GI5K-3169	3499822	3500820	23	reverse
GI5K-3215	3559479	3560696	23	reverse
GI5K-3301	3656223	3657578	23	reverse
GI5K-4490	4913235	4915082	23	reverse
GI5K-4916	5379415	5382246	23	reverse
GI5K-4923	5388497	5388754	23	reverse
GI5K-120	135162	135890	24	forward
GI5K-1183	1259590	1260021	24	forward
GI5K-3009	3317016	3318287	24	forward
GI5K-3291	3645827	3646897	24	forward
GI5K-1260	1343444	1345156	24	reverse
GI5K-4535	4984830	4986500	24	reverse
GI5K-5462	5993276	5993626	24	reverse
GI5K-5475	6008728	6009579	24	reverse
GI5K-115	131135	132208	25	forward
GI5K-116	132234	133148	25	forward
GI5K-354	392770	395049	25	forward
GI5K-578	627637	628125	25	forward
GI5K-787	841579	842601	25	forward
GI5K-1181	1258782	1259120	25	forward
GI5K-1372	1467925	1469115	25	forward
GI5K-1646	1769732	1770847	25	forward
GI5K-2453	2622671	2625106	25	forward
GI5K-2598	2793178	2794191	25	forward
GI5K-2986	3290965	3291489	25	forward
GI5K-3222	3566872	3567564	25	forward
GI5K-3870	4269374	4270096	25	forward
GI5K-4300	4706899	4707138	25	forward
GI5K-4777	5241572	5242021	25	forward
GI5K-5446	5977575	5977910	25	forward
GI5K-2794	3075453	3075596	25	reverse
GI5K-2980	3285822	3286682	25	reverse
GI5K-3607	3979782	3983270	25	reverse
GI5K-4063	4474369	4475688	25	reverse
GI5K-4731	5191975	5192535	25	reverse
GI5K-317	355236	356390	26	forward
GI5K-921	989984	990643	26	forward
GI5K-1029	1102008	1102598	26	forward
GI5K-1188	1264132	1265421	26	forward
GI5K-3346	3708550	3708876	26	forward
GI5K-3611	3986936	3989335	26	forward
GI5K-5094	5575942	5578893	26	forward
GI5K-5743	6297661	6298197	26	forward
GI5K-16	17389	18762	26	reverse
GI5K-173	192659	193039	26	reverse
GI5K-2407	2571056	2571949	26	reverse
GI5K-2625	2821507	2822322	26	reverse
GI5K-2948	3247868	3248218	26	reverse
GI5K-3818	4215345	4215869	26	reverse
GI5K-3926	4332925	4333872	26	reverse
GI5K-4727	5183983	5188533	26	reverse
GI5K-5570	6110128	6111291	26	reverse
GI5K-5643	6191799	6192929	26	reverse
GI5K-98	113281	115506	27	forward
GI5K-1177	1255607	1255993	27	forward
GI5K-2447	2616936	2617304	27	forward
GI5K-2918	3220256	3221353	27	forward
GI5K-3382	3747130	3747348	27	forward
GI5K-3997	4405954	4406322	27	forward
GI5K-4798	5260394	5262133	27	forward
GI5K-181	201007	202926	27	reverse
GI5K-789	843098	843736	27	reverse
GI5K-862	921046	923232	27	reverse
GI5K-2420	2585648	2587177	27	reverse
GI5K-2868	3160432	3160737	27	reverse
GI5K-2911	3211626	3212621	27	reverse
GI5K-2937	3238696	3239118	27	reverse
GI5K-3031	3340864	3341373	27	reverse
GI5K-3421	3782525	3782821	27	reverse
GI5K-3469	3827587	3829062	27	reverse
GI5K-3689	4070205	4070678	27	reverse
GI5K-4070	4482657	4484045	27	reverse
GI5K-4707	5161654	5162103	27	reverse
GI5K-4955	5423547	5426678	27	reverse
GI5K-5113	5599356	5601878	27	reverse
GI5K-1	483	2027	28	forward
GI5K-199	224119	224931	28	forward
GI5K-733	768367	769695	28	forward
GI5K-1129	1210828	1211142	28	forward
GI5K-1342	1434813	1435598	28	forward
GI5K-2078	2246591	2247640	28	forward
GI5K-2561	2740838	2742028	28	forward
GI5K-2676	2899827	2900261	28	forward
GI5K-2811	3090885	3094634	28	forward
GI5K-4663	5123078	5123455	28	forward
GI5K-4822	5286291	5287619	28	forward
GI5K-5295	5789851	5791050	28	forward
GI5K-5432	5963960	5964493	28	forward
GI5K-5513	6053126	6054412	28	forward
GI5K-5856	6424984	6425277	28	forward
GI5K-882	947387	948499	28	reverse
GI5K-1658	1782763	1783554	28	reverse
GI5K-2724	2991632	2992486	28	reverse
GI5K-2988	3291942	3293306	28	reverse
GI5K-3927	4333899	4334456	28	reverse
GI5K-4140	4553158	4553868	28	reverse
GI5K-4485	4909071	4909550	28	reverse
GI5K-4585	5039188	5040342	28	reverse
GI5K-5414	5937636	5939069	28	reverse
GI5K-5605	6150967	6152184	28	reverse
GI5K-656	702733	703080	29	forward
GI5K-695	740947	741028	29	forward
GI5K-1175	1253836	1254327	29	forward
GI5K-1713	1850024	1851712	29	forward
GI5K-2764	3039896	3041041	29	forward
GI5K-4417	4833756	4835039	29	forward
GI5K-4703	5158820	5159680	29	forward
GI5K-4836	5294926	5295531	29	forward
GI5K-5269	5759803	5760417	29	forward
GI5K-765	812129	812617	29	reverse
GI5K-885	950502	951014	29	reverse
GI5K-1217	1293079	1294221	29	reverse
GI5K-1356	1452241	1453275	29	reverse
GI5K-2344	2503467	2503745	29	reverse
GI5K-5210	5697536	5698327	29	reverse
GI5K-5310	5808435	5808665	29	reverse
GI5K-5879	6449427	6450206	29	reverse
GI5K-47	59018	59704	30	forward
GI5K-216	238918	240351	30	forward
GI5K-709	755164	755634	30	forward
GI5K-710	755665	757785	30	forward
GI5K-891	956812	957381	30	forward
GI5K-1505	1622352	1623338	30	forward
GI5K-2026	2192750	2194897	30	forward
GI5K-3756	4147938	4151027	30	forward
GI5K-4358	4767825	4769072	30	forward
GI5K-5008	5487031	5487579	30	forward
GI5K-5664	6215945	6216775	30	forward
GI5K-817	871465	872487	30	reverse
GI5K-1091	1172887	1173132	30	reverse
GI5K-1793	1939714	1941291	30	reverse
GI5K-2791	3070920	3072155	30	reverse
GI5K-2912	3212649	3213824	30	reverse
GI5K-3668	4049210	4049617	30	reverse
GI5K-5042	5520974	5521510	30	reverse
GI5K-5817	6378082	6379164	30	reverse
GI5K-5949	6521534	6522910	30	reverse
GI5K-502	557442	557885	31	forward
GI5K-688	734686	734759	31	forward
GI5K-973	1040914	1042854	31	forward
GI5K-2605	2800268	2801389	31	forward
GI5K-4723	5180631	5181008	31	forward
GI5K-5794	6355782	6355988	31	forward
GI5K-2345	2503775	2504167	31	reverse
GI5K-2771	3047822	3048616	31	reverse
GI5K-2834	3124185	3124655	31	reverse
GI5K-3853	4248928	4250235	31	reverse
GI5K-4365	4774608	4775429	31	reverse
GI5K-4408	4825456	4826040	31	reverse
GI5K-4516	4955401	4955473	31	reverse
GI5K-5056	5539415	5539487	31	reverse
GI5K-5758	6315886	6315958	31	reverse
GI5K-650	699647	700636	32	forward
GI5K-1397	1496636	1497385	32	forward
GI5K-1504	1621282	1622319	32	forward
GI5K-1853	1994594	1995439	32	forward
GI5K-1955	2104138	2104401	32	forward
GI5K-2337	2491674	2491988	32	forward
GI5K-3010	3318312	3319541	32	forward
GI5K-65	74060	75043	32	reverse
GI5K-255	279718	280557	32	reverse
GI5K-826	882259	883278	32	reverse
GI5K-1791	1937791	1938417	32	reverse
GI5K-2713	2952680	2953633	32	reverse
GI5K-2798	3079172	3079537	32	reverse
GI5K-3682	4064032	4065393	32	reverse
GI5K-4270	4674192	4675181	32	reverse
GI5K-4465	4891261	4892103	32	reverse
GI5K-285	320329	320736	33	forward
GI5K-1031	1103206	1104801	33	forward
GI5K-1880	2025973	2026257	33	forward
GI5K-2071	2240959	2241141	33	forward
GI5K-2080	2248294	2249280	33	forward
GI5K-2484	2656149	2657975	33	forward
GI5K-2597	2792656	2793144	33	forward
GI5K-3112	3441918	3443309	33	forward
GI5K-5888	6459514	6459804	33	forward
GI5K-1522	1643445	1644245	33	reverse
GI5K-1591	1717889	1718347	33	reverse
GI5K-2699	2938495	2939415	33	reverse
GI5K-3411	3775306	3775728	33	reverse
GI5K-4146	4557967	4559040	33	reverse
GI5K-4715	5172233	5173690	33	reverse
GI5K-5153	5642400	5642645	33	reverse
GI5K-536	590293	591075	34	forward
GI5K-1848	1988578	1989573	34	forward
GI5K-2322	2470426	2471442	34	forward
GI5K-5430	5961348	5963111	34	forward
GI5K-146	162413	163261	34	reverse
GI5K-360	399726	400523	34	reverse
GI5K-438	479319	480734	34	reverse
GI5K-1580	1703714	1704058	34	reverse
GI5K-3116	3447272	3447928	34	reverse
GI5K-4018	4427833	4428240	34	reverse
GI5K-4486	4909579	4910241	34	reverse
GI5K-5317	5814807	5815991	34	reverse
GI5K-1176	1254357	1255571	35	forward
GI5K-1292	1375985	1376626	35	forward
GI5K-2574	2758086	2759846	35	forward
GI5K-3725	4113679	4114620	35	forward
GI5K-4232	4638585	4639574	35	forward
GI5K-4342	4753546	4754154	35	forward
GI5K-5791	6353285	6354271	35	forward
GI5K-179	198460	200499	35	reverse
GI5K-764	810876	812093	35	reverse
GI5K-1592	1718381	1718965	35	reverse
GI5K-3216	3560720	3561208	35	reverse
GI5K-3470	3829090	3829596	35	reverse
GI5K-3815	4212329	4213156	35	reverse
GI5K-5367	5875218	5876495	35	reverse
GI5K-1067	1144659	1146221	36	forward
GI5K-3772	4166280	4166705	36	forward
GI5K-4593	5045954	5047120	36	forward
GI5K-4635	5089455	5090555	36	forward
GI5K-4940	5405096	5406310	36	forward
GI5K-5029	5509336	5510184	36	forward
GI5K-5525	6064004	6064402	36	forward
GI5K-387	427077	428075	36	reverse
GI5K-612	662979	663359	36	reverse
GI5K-1214	1289880	1291259	36	reverse
GI5K-2204	2376726	2377697	36	reverse
GI5K-2746	3017584	3019590	36	reverse
GI5K-3000	3307292	3308224	36	reverse
GI5K-3537	3906090	3907319	36	reverse
GI5K-4081	4492050	4494344	36	reverse
GI5K-4174	4586665	4587288	36	reverse
GI5K-4763	5232640	5232712	36	reverse
GI5K-5309	5807529	5808398	36	reverse
GI5K-5508	6048769	6049260	36	reverse
GI5K-5822	6383971	6385185	36	reverse
GI5K-1267	1352097	1352708	37	forward
GI5K-1269	1353267	1353461	37	forward
GI5K-1900	2050430	2051350	37	forward
GI5K-1982	2148060	2148536	37	forward
GI5K-2060	2229651	2230649	37	forward
GI5K-3767	4162977	4163627	37	forward
GI5K-4555	5009374	5010111	37	forward
GI5K-5593	6136038	6137402	37	forward
GI5K-5837	6404008	6406194	37	forward
GI5K-986	1053645	1054682	37	reverse
GI5K-998	1066311	1067594	37	reverse
GI5K-2451	2620775	2621455	37	reverse
GI5K-4581	5035463	5036782	37	reverse
GI5K-1429	1529470	1531197	38	forward
GI5K-2146	2318037	2318621	38	forward
GI5K-2892	3188265	3189263	38	forward
GI5K-3528	3895910	3896815	38	forward
GI5K-5603	6148877	6150070	38	forward
GI5K-55	67187	67735	38	reverse
GI5K-1758	1900319	1902124	38	reverse
GI5K-1865	2006575	2007789	38	reverse
GI5K-2747	3019627	3020694	38	reverse
GI5K-3900	4304556	4305404	38	reverse
GI5K-4282	4687275	4688627	38	reverse
GI5K-4729	5189195	5190964	38	reverse
GI5K-1236	1311858	1312034	39	forward
GI5K-1975	2138292	2141873	39	forward
GI5K-3038	3349149	3351023	39	forward
GI5K-3062	3387041	3387703	39	forward
GI5K-1440	1542808	1544325	39	reverse
GI5K-2779	3058179	3059291	39	reverse
GI5K-3298	3651973	3653661	39	reverse
GI5K-4305	4713564	4714166	39	reverse
GI5K-4405	4822581	4824005	39	reverse
GI5K-5673	6224329	6225657	39	reverse
GI5K-21	22893	23981	40	forward
GI5K-193	215908	218280	40	forward
GI5K-312	348859	349611	40	forward
GI5K-1563	1692252	1693076	40	forward
GI5K-2806	3086373	3087260	40	forward
GI5K-3206	3548064	3550478	40	forward
GI5K-5033	5512065	5512649	40	forward
GI5K-5658	6209585	6212437	40	forward
GI5K-5675	6226475	6226735	40	forward
GI5K-249	274012	274488	40	reverse
GI5K-451	496862	497416	40	reverse
GI5K-1545	1671482	1673239	40	reverse
GI5K-3363	3727851	3728876	40	reverse
GI5K-3512	3879065	3879706	40	reverse
GI5K-3706	4091232	4091588	40	reverse
GI5K-4128	4540065	4540982	40	reverse
GI5K-4324	4735450	4736562	40	reverse
GI5K-4523	4968641	4972156	40	reverse
GI5K-5375	5883665	5885089	40	reverse
GI5K-1278	1361846	1362604	41	forward
GI5K-1656	1780802	1782106	41	forward
GI5K-2735	3007457	3007780	41	forward
GI5K-3273	3629785	3630303	41	forward
GI5K-5032	5511409	5512023	41	forward
GI5K-5232	5726982	5727074	41	forward
GI5K-5895	6466722	6467510	41	forward
GI5K-507	562082	562402	41	reverse
GI5K-2640	2834555	2835466	41	reverse
GI5K-2776	3054202	3055134	41	reverse
GI5K-4099	4509070	4510215	41	reverse
GI5K-5768	6327512	6328351	41	reverse
GI5K-5948	6521067	6521492	41	reverse
GI5K-499	553627	554424	42	forward
GI5K-642	693583	694041	42	forward
GI5K-1179	1256352	1256873	42	forward
GI5K-2190	2363130	2364260	42	forward
GI5K-3209	3553065	3554705	42	forward
GI5K-4631	5085536	5085919	42	forward
GI5K-5656	6208279	6209160	42	forward
GI5K-450	495947	496819	42	reverse
GI5K-1110	1192617	1193000	42	reverse
GI5K-3546	3915162	3916391	42	reverse
GI5K-4154	4566976	4567989	42	reverse
GI5K-4265	4668703	4670169	42	reverse
GI5K-5062	5544387	5545403	42	reverse
GI5K-5196	5683209	5684876	42	reverse
GI5K-5355	5858970	5860649	42	reverse
GI5K-5461	5992334	5993233	42	reverse
GI5K-738	771395	772396	43	forward
GI5K-1167	1245985	1247103	43	forward
GI5K-1296	1384936	1385475	43	forward
GI5K-1854	1995472	1996632	43	forward
GI5K-1990	2155414	2156517	43	forward
GI5K-2397	2561978	2563057	43	forward
GI5K-2589	2779567	2781063	43	forward
GI5K-3046	3364838	3366562	43	forward
GI5K-3195	3535976	3538003	43	forward
GI5K-5529	6068121	6069188	43	forward
GI5K-605	654752	655984	43	reverse
GI5K-610	661752	662084	43	reverse
GI5K-1615	1740354	1742264	43	reverse
GI5K-1833	1976148	1976624	43	reverse
GI5K-2442	2610796	2611923	43	reverse
GI5K-3445	3801649	3802800	43	reverse
GI5K-2606	2801421	2801711	44	forward
GI5K-3199	3540495	3540842	44	forward
GI5K-3716	4103096	4104478	44	forward
GI5K-3790	4184198	4186099	44	forward
GI5K-81	95402	95866	44	reverse
GI5K-3686	4068673	4068942	44	reverse
GI5K-4472	4897432	4897827	44	reverse
GI5K-5114	5601906	5603387	44	reverse
GI5K-621	673136	675529	45	forward
GI5K-1376	1473505	1474566	45	forward
GI5K-1386	1487153	1487998	45	forward
GI5K-1398	1497418	1498053	45	forward
GI5K-2896	3192371	3193795	45	forward
GI5K-2151	2323029	2325014	45	reverse
GI5K-2422	2589049	2589357	45	reverse
GI5K-3601	3971117	3971443	45	reverse
GI5K-3604	3975847	3976224	45	reverse
GI5K-3669	4049648	4050127	45	reverse
GI5K-4067	4480118	4480813	45	reverse
GI5K-4284	4689061	4690221	45	reverse
GI5K-5884	6454656	6455261	45	reverse
GI5K-92	105874	108582	46	forward
GI5K-428	464377	464784	46	forward
GI5K-657	703110	703364	46	forward
GI5K-2529	2708860	2709183	46	forward
GI5K-2649	2844726	2845874	46	forward
GI5K-3185	3522478	3522774	46	forward
GI5K-959	1028696	1029337	46	reverse
GI5K-3148	3482981	3483373	46	reverse
GI5K-3938	4343539	4344210	46	reverse
GI5K-4068	4480859	4481644	46	reverse
GI5K-5591	6133932	6135200	46	reverse
GI5K-5598	6143444	6143833	46	reverse
GI5K-5719	6275878	6276249	46	reverse
GI5K-633	687109	687309	47	forward
GI5K-880	945954	946913	47	forward
GI5K-2306	2459289	2459732	47	forward
GI5K-2668	2889137	2890393	47	forward
GI5K-339	377448	378491	47	reverse
GI5K-3093	3418259	3419098	47	reverse
GI5K-5801	6358152	6358262	47	reverse
GI5K-122	136732	138081	48	forward
GI5K-699	742560	742632	48	forward
GI5K-2363	2521309	2521704	48	forward
GI5K-3100	3427393	3427797	48	forward
GI5K-3620	3997636	3998145	48	forward
GI5K-4418	4835069	4836052	48	forward
GI5K-4592	5045603	5045905	48	forward
GI5K-4781	5245268	5246905	48	forward
GI5K-425	461511	462080	48	reverse
GI5K-1330	1422613	1423398	48	reverse
GI5K-2369	2526807	2528114	48	reverse
GI5K-3352	3715097	3715351	48	reverse
GI5K-3441	3799503	3799694	48	reverse
GI5K-4278	4683383	4684021	48	reverse
GI5K-4713	5167491	5168339	48	reverse
GI5K-4962	5435993	5436196	48	reverse
GI5K-5177	5659342	5660739	48	reverse
GI5K-5373	5880991	5882199	48	reverse
GI5K-5521	6061562	6062299	48	reverse
GI5K-484	538283	539641	49	forward
GI5K-493	547884	548288	49	forward
GI5K-1507	1624802	1626253	49	forward
GI5K-1902	2053367	2053439	49	forward
GI5K-2383	2544083	2546152	49	forward
GI5K-2785	3064789	3065349	49	forward
GI5K-3531	3897972	3900218	49	forward
GI5K-4739	5202483	5203937	49	forward
GI5K-5811	6373059	6373694	49	forward
GI5K-287	321051	321983	49	reverse
GI5K-351	390120	391361	49	reverse
GI5K-949	1016947	1017840	49	reverse
GI5K-1898	2047744	2049243	49	reverse
GI5K-5107	5594439	5594636	49	reverse
GI5K-5417	5945430	5946536	49	reverse
GI5K-5954	6526491	6526748	49	reverse
GI5K-348	387894	388361	50	forward
GI5K-429	464831	465196	50	forward
GI5K-1374	1470564	1472948	50	forward
GI5K-1631	1754862	1755677	50	forward
GI5K-2125	2296065	2296901	50	forward
GI5K-4612	5067018	5068148	50	forward
GI5K-4636	5090592	5091503	50	forward
GI5K-4840	5301173	5301439	50	forward
GI5K-534	588006	588320	50	reverse
GI5K-1542	1667115	1667345	50	reverse
GI5K-2213	2386531	2386983	50	reverse
GI5K-2230	2397913	2400054	50	reverse
GI5K-2514	2692127	2692432	50	reverse
GI5K-2903	3200932	3202104	50	reverse
GI5K-4624	5079035	5080678	50	reverse
GI5K-4646	5102858	5104042	50	reverse
GI5K-5075	5557967	5558950	50	reverse
GI5K-5197	5684919	5685128	50	reverse
GI5K-5353	5857011	5857715	50	reverse
GI5K-5776	6336271	6336750	50	reverse
GI5K-5777	6336801	6337766	50	reverse
GI5K-5950	6522941	6523801	50	reverse
GI5K-859	918509	919420	51	forward
GI5K-1565	1693512	1693850	51	reverse
GI5K-1636	1758954	1759139	51	reverse
GI5K-2150	2322153	2322977	51	reverse
GI5K-2183	2356352	2356858	51	reverse
GI5K-2857	3147362	3148864	51	reverse
GI5K-3316	3675521	3675594	51	reverse
GI5K-5316	5813463	5814755	51	reverse
GI5K-5735	6290543	6291697	51	reverse
GI5K-303	337768	338724	52	forward
GI5K-1285	1368457	1369761	52	forward
GI5K-1433	1534832	1536037	52	forward
GI5K-1623	1748289	1749125	52	forward
GI5K-2593	2784041	2785327	52	forward
GI5K-3345	3706047	3708497	52	forward
GI5K-3564	3932315	3933703	52	forward
GI5K-4742	5206678	5207589	52	forward
GI5K-1111	1193043	1193138	52	reverse
GI5K-1619	1745467	1746162	52	reverse
GI5K-2130	2300528	2301301	52	reverse
GI5K-2977	3282592	3285030	52	reverse
GI5K-3130	3461287	3462201	52	reverse
GI5K-3514	3880629	3881066	52	reverse
GI5K-4184	4593629	4594135	52	reverse
GI5K-4189	4597689	4598135	52	reverse
GI5K-4249	4656406	4656891	52	reverse
GI5K-5649	6198335	6199408	52	reverse
GI5K-1196	1272963	1273418	53	forward
GI5K-1393	1493023	1494135	53	forward
GI5K-1607	1733200	1734333	53	forward
GI5K-1704	1840369	1840677	53	forward
GI5K-2392	2558922	2560109	53	forward
GI5K-2404	2568133	2569314	53	forward
GI5K-3134	3465040	3466911	53	forward
GI5K-18	20090	21034	53	reverse
GI5K-509	563308	563601	53	reverse
GI5K-1965	2120707	2121786	53	reverse
GI5K-2123	2294770	2295027	53	reverse
GI5K-2228	2396846	2397391	53	reverse
GI5K-2659	2877066	2877917	53	reverse
GI5K-3167	3497825	3498751	53	reverse
GI5K-3497	3863071	3863622	53	reverse
GI5K-3674	4053770	4054876	53	reverse
GI5K-4434	4852169	4852426	53	reverse
GI5K-4639	5094303	5095250	53	reverse
GI5K-4969	5442038	5442589	53	reverse
GI5K-5259	5750379	5750993	53	reverse
GI5K-5419	5947116	5949248	53	reverse
GI5K-316	354084	355181	54	forward
GI5K-661	706286	707056	54	forward
GI5K-1003	1074127	1074558	54	forward
GI5K-1106	1189694	1190377	54	forward
GI5K-3619	3996583	3997581	54	forward
GI5K-4526	4973983	4974786	54	forward
GI5K-5703	6259725	6261305	54	forward
GI5K-5725	6281317	6281697	54	forward
GI5K-383	423650	424198	54	reverse
GI5K-1659	1783583	1784053	54	reverse
GI5K-1765	1908686	1909495	54	reverse
GI5K-2450	2620013	2620720	54	reverse
GI5K-2804	3085289	3085870	54	reverse
GI5K-3328	3687156	3687228	54	reverse
GI5K-3501	3867742	3868896	54	reverse
GI5K-4062	4473553	4474314	54	reverse
GI5K-4764	5232749	5233456	54	reverse
GI5K-302	336327	337712	55	forward
GI5K-624	677604	678713	55	forward
GI5K-698	741311	742504	55	forward
GI5K-1291	1375234	1375929	55	forward
GI5K-1341	1434062	1434757	55	forward
GI5K-2186	2360105	2360710	55	forward
GI5K-2209	2383065	2383511	55	forward
GI5K-4939	5403895	5405040	55	forward
GI5K-5437	5969743	5971425	55	forward
GI5K-382	421999	423594	55	reverse
GI5K-2118	2289187	2289876	55	reverse
GI5K-2869	3160765	3161766	55	reverse
GI5K-2947	3247591	3247812	55	reverse
GI5K-3476	3841020	3841622	55	reverse
GI5K-3718	4105311	4105544	55	reverse
GI5K-4123	4533871	4535157	55	reverse
GI5K-4171	4585653	4585871	55	reverse
GI5K-4281	4686017	4687219	55	reverse
GI5K-4384	4797779	4798942	55	reverse
GI5K-4936	5401030	5401584	55	reverse
GI5K-5392	5903344	5904267	55	reverse
GI5K-210	232593	233525	56	forward
GI5K-1107	1190432	1191250	56	forward
GI5K-1205	1282296	1282772	56	forward
GI5K-1583	1706618	1708375	56	forward
GI5K-1987	2153286	2153567	56	forward
GI5K-2371	2530609	2531289	56	forward
GI5K-3162	3493209	3493778	56	forward
GI5K-3451	3807762	3808082	56	forward
GI5K-3886	4291948	4292745	56	forward
GI5K-5290	5785100	5786038	56	forward
GI5K-62	71923	72360	56	reverse
GI5K-1653	1776770	1777648	56	reverse
GI5K-2019	2185022	2185408	56	reverse
GI5K-4423	4840050	4840871	56	reverse
GI5K-5130	5617015	5617821	56	reverse
GI5K-5781	6340863	6342017	56	reverse
GI5K-24	25757	26674	57	forward
GI5K-215	237370	238860	57	forward
GI5K-649	699383	699589	57	forward
GI5K-3119	3449781	3451736	57	forward
GI5K-4831	5292765	5293115	57	forward
GI5K-2694	2930093	2931397	57	reverse
GI5K-3327	3687017	3687098	57	reverse
GI5K-3513	3879747	3880571	57	reverse
GI5K-4160	4575244	4575957	57	reverse
GI5K-5323	5820141	5821112	57	reverse
GI5K-5953	6525963	6526433	57	reverse
GI5K-373	414409	415233	58	forward
GI5K-399	438196	438396	58	forward
GI5K-463	511622	513112	58	forward
GI5K-662	707111	707713	58	forward
GI5K-1243	1317148	1317348	58	forward
GI5K-1918	2065916	2066479	58	forward
GI5K-1958	2108357	2110321	58	forward
GI5K-2288	2447809	2448390	58	forward
GI5K-2617	2811128	2812006	58	forward
GI5K-3070	3394935	3395342	58	forward
GI5K-3866	4265435	4266256	58	forward
GI5K-4427	4844691	4845509	58	forward
GI5K-4783	5251580	5252446	58	forward
GI5K-4934	5398633	5399121	58	forward
GI5K-5030	5510221	5510292	58	forward
GI5K-5562	6103138	6104058	58	forward
GI5K-5721	6277196	6278059	58	forward
GI5K-952	1019347	1020741	58	reverse
GI5K-1209	1285136	1285843	58	reverse
GI5K-2234	2402727	2403137	58	reverse
GI5K-2359	2517383	2517997	58	reverse
GI5K-2907	3205778	3206281	58	reverse
GI5K-3287	3642173	3643165	58	reverse
GI5K-5170	5655635	5656435	58	reverse
GI5K-5835	6398719	6400920	58	reverse
GI5K-1168	1247147	1247485	59	forward
GI5K-1430	1531236	1532423	59	forward
GI5K-2756	3029917	3030393	59	forward
GI5K-4722	5179126	5180571	59	forward
GI5K-5547	6085293	6085838	59	forward
GI5K-219	243064	243945	59	reverse
GI5K-2119	2289932	2290717	59	reverse
GI5K-2438	2606611	2607780	59	reverse
GI5K-2566	2747020	2748414	59	reverse
GI5K-3642	4024551	4024907	59	reverse
GI5K-3664	4046127	4046849	59	reverse
GI5K-3802	4198236	4198748	59	reverse
GI5K-4180	4591106	4591178	59	reverse
GI5K-4961	5434929	5435933	59	reverse
GI5K-5391	5902247	5903284	59	reverse
GI5K-5427	5957662	5958429	59	reverse
GI5K-431	465868	467916	60	forward
GI5K-1051	1126214	1128139	60	forward
GI5K-2336	2489403	2491613	60	forward
GI5K-3165	3495613	3496365	60	forward
GI5K-3243	3597214	3598236	60	forward
GI5K-3289	3644484	3645194	60	forward
GI5K-4842	5301889	5303424	60	forward
GI5K-5369	5877500	5877832	60	forward
GI5K-5555	6095892	6096902	60	forward
GI5K-676	722204	723004	60	reverse
GI5K-4399	4816867	4817568	60	reverse
GI5K-4562	5017092	5017451	60	reverse
GI5K-4583	5038205	5038795	60	reverse
GI5K-5060	5542343	5543356	60	reverse
GI5K-5764	6322104	6323576	60	reverse
GI5K-2319	2469159	2469692	61	forward
GI5K-3163	3493835	3494857	61	forward
GI5K-3174	3506718	3507815	61	forward
GI5K-5535	6073485	6074237	61	forward
GI5K-5724	6279150	6281255	61	forward
GI5K-71	80049	80963	61	reverse
GI5K-403	441599	441856	61	reverse
GI5K-505	560220	561194	61	reverse
GI5K-807	862150	862476	61	reverse
GI5K-1772	1914796	1915611	61	reverse
GI5K-2221	2393754	2394416	61	reverse
GI5K-4257	4660244	4660331	61	reverse
GI5K-5038	5517418	5518065	61	reverse
GI5K-5815	6377112	6377660	61	reverse
GI5K-58	69374	70261	62	forward
GI5K-4244	4651789	4653111	62	forward
GI5K-4329	4738824	4740008	62	forward
GI5K-5242	5735117	5735422	62	forward
GI5K-309	345159	345824	62	reverse
GI5K-386	426604	427014	62	reverse
GI5K-1119	1200057	1200689	62	reverse
GI5K-1265	1350839	1351339	62	reverse
GI5K-1806	1952350	1954182	62	reverse
GI5K-2226	2395992	2396312	62	reverse
GI5K-2851	3140930	3142237	62	reverse
GI5K-2890	3186337	3187047	62	reverse
GI5K-4982	5457101	5458807	62	reverse
GI5K-5003	5483039	5483524	62	reverse
GI5K-5477	6010690	6012093	62	reverse
GI5K-1036	1107458	1108471	63	forward
GI5K-1442	1545469	1545939	63	forward
GI5K-3200	3540887	3542119	63	forward
GI5K-4778	5242047	5242217	63	forward
GI5K-4841	5301490	5301825	63	forward
GI5K-5148	5636684	5638117	63	forward
GI5K-2691	2927517	2928020	63	reverse
GI5K-3820	4216673	4217134	63	reverse
GI5K-3854	4250267	4250878	63	reverse
GI5K-5282	5776477	5777190	63	reverse
GI5K-114	130492	131070	64	forward
GI5K-395	435419	436273	64	forward
GI5K-1200	1276607	1278778	64	forward
GI5K-1387	1488044	1489333	64	forward
GI5K-1596	1720161	1720676	64	forward
GI5K-1831	1975171	1975542	64	forward
GI5K-2085	2252711	2253607	64	forward
GI5K-2362	2520399	2521244	64	forward
GI5K-3279	3636128	3637168	64	forward
GI5K-3370	3738178	3738981	64	forward
GI5K-3637	4019120	4020034	64	forward
GI5K-5336	5835355	5836818	64	forward
GI5K-783	836689	837600	64	reverse
GI5K-868	932168	932566	64	reverse
GI5K-1819	1963706	1964041	64	reverse
GI5K-1868	2009666	2010406	64	reverse
GI5K-3304	3660468	3661208	64	reverse
GI5K-4578	5032471	5033043	64	reverse
GI5K-313	349652	351010	65	forward
GI5K-573	623313	624377	65	forward
GI5K-687	733095	734620	65	forward
GI5K-706	746203	750276	65	forward
GI5K-976	1045017	1046042	65	forward
GI5K-1022	1091836	1092411	65	forward
GI5K-1526	1648632	1649519	65	forward
GI5K-1665	1787861	1789576	65	forward
GI5K-1767	1910972	1911688	65	forward
GI5K-4426	4843462	4844625	65	forward
GI5K-5161	5649827	5650576	65	forward
GI5K-5699	6257067	6258401	65	forward
GI5K-5723	6278818	6279084	65	forward
GI5K-56	67774	68280	65	reverse
GI5K-236	260374	261639	65	reverse
GI5K-1693	1826612	1827112	65	reverse
GI5K-2108	2279668	2280846	65	reverse
GI5K-2232	2401079	2401672	65	reverse
GI5K-2534	2714625	2714903	65	reverse
GI5K-3933	4338173	4338790	65	reverse
GI5K-4499	4937932	4939074	65	reverse
GI5K-4517	4955505	4955578	65	reverse
GI5K-4568	5022041	5022814	65	reverse
GI5K-5057	5539519	5539592	65	reverse
GI5K-5119	5604675	5605430	65	reverse
GI5K-5454	5983588	5984550	65	reverse
GI5K-5759	6315990	6316063	65	reverse
GI5K-1127	1209585	1210067	66	forward
GI5K-1743	1887467	1888054	66	forward
GI5K-2961	3264184	3264600	66	forward
GI5K-3724	4111189	4113612	66	forward
GI5K-4013	4423761	4424174	66	forward
GI5K-5142	5629153	5630298	66	forward
GI5K-5401	5920919	5924275	66	forward
GI5K-987	1054720	1055343	66	reverse
GI5K-1018	1088521	1088955	66	reverse
GI5K-1401	1500527	1500850	66	reverse
GI5K-1829	1972347	1973492	66	reverse
GI5K-2264	2429873	2431111	66	reverse
GI5K-2880	3175803	3176147	66	reverse
GI5K-4074	4485905	4486267	66	reverse
GI5K-4193	4600488	4601234	66	reverse
GI5K-5356	5860692	5862782	66	reverse
GI5K-5631	6180061	6180543	66	reverse
GI5K-5727	6282490	6283110	66	reverse
GI5K-194	218321	219223	67	forward
GI5K-821	875397	877481	67	forward
GI5K-1624	1749178	1750182	67	forward
GI5K-1774	1916624	1917562	67	forward
GI5K-2814	3096787	3103164	67	forward
GI5K-2920	3221908	3223428	67	forward
GI5K-3013	3321024	3321965	67	forward
GI5K-3118	3448793	3449713	67	forward
GI5K-4003	4413782	4415116	67	forward
GI5K-4233	4639610	4640035	67	forward
GI5K-4740	5203987	5205588	67	forward
GI5K-4834	5294150	5294512	67	forward
GI5K-5084	5567101	5567955	67	forward
GI5K-5091	5574317	5574763	67	forward
GI5K-5204	5692539	5693078	67	forward
GI5K-5902	6472805	6474136	67	forward
GI5K-506	561256	562014	67	reverse
GI5K-3535	3903275	3904000	67	reverse
GI5K-4487	4910276	4911982	67	reverse
GI5K-4677	5135577	5136923	67	reverse
GI5K-5600	6145113	6146732	67	reverse
GI5K-5601	6146800	6147798	67	reverse
GI5K-5945	6518218	6518991	67	reverse
GI5K-1325	1418687	1419982	68	forward
GI5K-1740	1878700	1879299	68	forward
GI5K-1875	2018692	2019789	68	forward
GI5K-1889	2036366	2038018	68	forward
GI5K-2112	2283740	2284354	68	forward
GI5K-2485	2658009	2658569	68	forward
GI5K-2557	2735341	2737035	68	forward
GI5K-3343	3702898	3704109	68	forward
GI5K-5515	6055751	6056524	68	forward
GI5K-5867	6435138	6436886	68	forward
GI5K-1895	2044203	2044275	68	reverse
GI5K-3230	3575143	3577506	68	reverse
GI5K-3526	3894332	3894808	68	reverse
GI5K-3545	3913657	3915093	68	reverse
GI5K-3769	4164079	4164555	68	reverse
GI5K-4361	4771279	4771752	68	reverse
GI5K-4626	5081218	5081685	68	reverse
GI5K-5306	5804393	5805469	68	reverse
GI5K-557	607682	608512	69	forward
GI5K-1383	1483003	1483953	69	forward
GI5K-1919	2066538	2067620	69	forward
GI5K-2139	2310997	2312676	69	forward
GI5K-3612	3989362	3990201	69	forward
GI5K-4833	5293805	5294080	69	forward
GI5K-5092	5574831	5575712	69	forward
GI5K-178	197548	198390	69	reverse
GI5K-449	494807	495877	69	reverse
GI5K-599	651201	651650	69	reverse
GI5K-1786	1935114	1935500	69	reverse
GI5K-3355	3717181	3718191	69	reverse
GI5K-4506	4942836	4943795	69	reverse
GI5K-366	406358	407398	70	forward
GI5K-977	1046108	1047268	70	forward
GI5K-1126	1208798	1209514	70	forward
GI5K-1373	1469141	1470493	70	forward
GI5K-1394	1494189	1495040	70	forward
GI5K-3568	3935985	3937349	70	forward
GI5K-4478	4902216	4903610	70	forward
GI5K-878	943770	945029	70	reverse
GI5K-4921	5385945	5387063	70	reverse
GI5K-5284	5778373	5779266	70	reverse
GI5K-5622	6169019	6171007	70	reverse
GI5K-5962	6533634	6535001	70	reverse
GI5K-130	142886	143386	71	forward
GI5K-1418	1518968	1519621	71	forward
GI5K-3754	4146137	4146754	71	forward
GI5K-4814	5277443	5278567	71	forward
GI5K-5907	6479530	6480408	71	forward
GI5K-329	367074	367766	71	reverse
GI5K-916	985718	986587	71	reverse
GI5K-1232	1308703	1310388	71	reverse
GI5K-1761	1905418	1905996	71	reverse
GI5K-1985	2151239	2152240	71	reverse
GI5K-2853	3143243	3144025	71	reverse
GI5K-3350	3713608	3714198	71	reverse
GI5K-4481	4905964	4906629	71	reverse
GI5K-5183	5667632	5668258	71	reverse
GI5K-149	164828	165925	72	forward
GI5K-570	621256	622419	72	forward
GI5K-629	682911	683729	72	forward
GI5K-989	1058202	1058633	72	forward
GI5K-1339	1432294	1433160	72	forward
GI5K-2057	2226281	2228506	72	forward
GI5K-2638	2832396	2833166	72	forward
GI5K-4867	5331863	5332168	72	forward
GI5K-5746	6299698	6300387	72	forward
GI5K-371	412384	413580	72	reverse
GI5K-1211	1287179	1287673	72	reverse
GI5K-1473	1580299	1580949	72	reverse
GI5K-2094	2261848	2262276	72	reverse
GI5K-2155	2328770	2329648	72	reverse
GI5K-3442	3799743	3800420	72	reverse
GI5K-3683	4065426	4066685	72	reverse
GI5K-4182	4591928	4592722	72	reverse
GI5K-5380	5889976	5890932	72	reverse
GI5K-5488	6023780	6024037	72	reverse
GI5K-5778	6337817	6338701	72	reverse
GI5K-1337	1431174	1431854	73	forward
GI5K-1927	2076891	2077538	73	forward
GI5K-2688	2911261	2912025	73	forward
GI5K-3597	3967658	3968545	73	forward
GI5K-4808	5268174	5270099	73	forward
GI5K-5411	5934144	5935217	73	forward
GI5K-5542	6080538	6082067	73	forward
GI5K-1135	1215812	1217167	73	reverse
GI5K-2246	2413674	2413937	73	reverse
GI5K-2522	2701170	2703530	73	reverse
GI5K-2748	3020733	3021266	73	reverse
GI5K-2753	3027086	3027583	73	reverse
GI5K-3840	4236144	4237343	73	reverse
GI5K-2016	2181527	2183086	74	forward
GI5K-3633	4014009	4014791	74	forward
GI5K-3907	4311093	4311980	74	forward
GI5K-5333	5831403	5832914	74	forward
GI5K-2343	2502850	2503392	74	reverse
GI5K-4302	4708174	4708956	74	reverse
GI5K-4577	5031317	5032396	74	reverse
GI5K-4968	5441709	5441963	74	reverse
GI5K-5939	6509471	6511495	74	reverse
GI5K-86	99431	100927	75	forward
GI5K-196	220837	221955	75	forward
GI5K-1102	1182125	1183531	75	forward
GI5K-2096	2263799	2264926	75	forward
GI5K-2238	2407091	2407711	75	forward
GI5K-3714	4100014	4101405	75	forward
GI5K-5707	6263598	6264053	75	forward
GI5K-1391	1490681	1491907	75	reverse
GI5K-1815	1960424	1961041	75	reverse
GI5K-2439	2607840	2609210	75	reverse
GI5K-2781	3060175	3061107	75	reverse
GI5K-2983	3287496	3287711	75	reverse
GI5K-374	415292	416104	76	forward
GI5K-436	477829	478623	76	forward
GI5K-511	564699	565457	76	forward
GI5K-1595	1719866	1720084	76	forward
GI5K-1662	1785406	1786338	76	forward
GI5K-3822	4217820	4219871	76	forward
GI5K-5898	6469554	6470231	76	forward
GI5K-2342	2500890	2502773	76	reverse
GI5K-3144	3476491	3478818	76	reverse
GI5K-3827	4224835	4225284	76	reverse
GI5K-4104	4514728	4515906	76	reverse
GI5K-5363	5870557	5871204	76	reverse
GI5K-682	727721	728143	77	forward
GI5K-1023	1092477	1092980	77	forward
GI5K-1190	1266094	1267236	77	forward
GI5K-1560	1689249	1690220	77	forward
GI5K-1884	2029301	2030569	77	forward
GI5K-2187	2360766	2361044	77	forward
GI5K-2707	2947542	2948951	77	forward
GI5K-3307	3662879	3663361	77	forward
GI5K-3447	3804043	3805026	77	forward
GI5K-3452	3808139	3808696	77	forward
GI5K-3730	4118644	4119309	77	forward
GI5K-3787	4180443	4181177	77	forward
GI5K-4700	5156461	5157954	77	forward
GI5K-5144	5633510	5633992	77	forward
GI5K-5217	5706731	5708359	77	forward
GI5K-5365	5872546	5874492	77	forward
GI5K-245	271601	272047	77	reverse
GI5K-861	920399	920968	77	reverse
GI5K-2268	2432715	2434523	77	reverse
GI5K-2642	2836165	2837511	77	reverse
GI5K-3761	4155789	4158230	77	reverse
GI5K-3978	4379275	4381332	77	reverse
GI5K-5671	6223248	6223565	77	reverse
GI5K-5713	6271267	6272595	77	reverse
GI5K-704	745034	745534	78	forward
GI5K-2895	3190988	3192292	78	forward
GI5K-4479	4903681	4904997	78	forward
GI5K-96	111195	112514	78	reverse
GI5K-2432	2599727	2600281	78	reverse
GI5K-2836	3125984	3126334	78	reverse
GI5K-3364	3728917	3729678	78	reverse
GI5K-3600	3970442	3971038	78	reverse
GI5K-4057	4464957	4465328	78	reverse
GI5K-4105	4515983	4518256	78	reverse
GI5K-4126	4537734	4538984	78	reverse
GI5K-5181	5665085	5666491	78	reverse
GI5K-5621	6167474	6168940	78	reverse
GI5K-1221	1297693	1299162	79	forward
GI5K-1913	2061055	2061966	79	forward
GI5K-2258	2423812	2424852	79	forward
GI5K-4442	4856798	4857841	79	forward
GI5K-5227	5719308	5719631	79	forward
GI5K-5554	6094556	6095812	79	forward
GI5K-5742	6296826	6297581	79	forward
GI5K-597	647191	649044	79	reverse
GI5K-772	821625	822791	79	reverse
GI5K-945	1013172	1013699	79	reverse
GI5K-2255	2419750	2420673	79	reverse
GI5K-3509	3876552	3877214	79	reverse
GI5K-3884	4289371	4291143	79	reverse
GI5K-3968	4370648	4371325	79	reverse
GI5K-4617	5073660	5074343	79	reverse
GI5K-4718	5174913	5175905	79	reverse
GI5K-1883	2028084	2029220	80	forward
GI5K-2170	2343997	2344767	80	forward
GI5K-2374	2532804	2533907	80	forward
GI5K-2923	3225300	3226106	80	forward
GI5K-5079	5563545	5563892	80	forward
GI5K-5832	6395062	6396528	80	forward
GI5K-404	441918	442241	80	reverse
GI5K-426	462129	463088	80	reverse
GI5K-2429	2596164	2597945	80	reverse
GI5K-2624	2821052	2821426	80	reverse
GI5K-2974	3279311	3281440	80	reverse
GI5K-3734	4124250	4124591	80	reverse
GI5K-4860	5320295	5323549	80	reverse
GI5K-1843	1983607	1984599	81	forward
GI5K-2273	2437310	2438188	81	forward
GI5K-2662	2880132	2881049	81	forward
GI5K-2921	3223496	3224443	81	forward
GI5K-4004	4415184	4415837	81	forward
GI5K-5159	5648586	5649443	81	forward
GI5K-5223	5714904	5715770	81	forward
GI5K-2532	2710945	2712999	81	reverse
GI5K-2700	2939449	2940867	81	reverse
GI5K-3393	3758224	3758955	81	reverse
GI5K-4132	4544567	4545922	81	reverse
GI5K-318	356417	357298	82	forward
GI5K-375	416181	416759	82	forward
GI5K-712	759165	759476	82	forward
GI5K-1490	1605748	1606074	82	forward
GI5K-2027	2194928	2196103	82	forward
GI5K-2197	2368830	2369063	82	forward
GI5K-4113	4524065	4524382	82	forward
GI5K-4467	4893060	4894265	82	forward
GI5K-4566	5019403	5020317	82	forward
GI5K-598	649124	651118	82	reverse
GI5K-1407	1506934	1508004	82	reverse
GI5K-1481	1591122	1592291	82	reverse
GI5K-2871	3163743	3164810	82	reverse
GI5K-3932	4337557	4338090	82	reverse
GI5K-4845	5304246	5304920	82	reverse
GI5K-5002	5482666	5482956	82	reverse
GI5K-5712	6269976	6271184	82	reverse
GI5K-59	70324	71028	83	forward
GI5K-335	373079	374068	83	forward
GI5K-1156	1237183	1237995	83	forward
GI5K-1645	1768608	1769648	83	forward
GI5K-1666	1789642	1789992	83	forward
GI5K-1954	2103194	2104054	83	forward
GI5K-2272	2436828	2437226	83	forward
GI5K-3779	4172017	4172709	83	forward
GI5K-5237	5732184	5732882	83	forward
GI5K-5813	6374808	6376007	83	forward
GI5K-133	145477	146970	83	reverse
GI5K-542	595676	595870	83	reverse
GI5K-845	903291	903533	83	reverse
GI5K-1019	1089022	1089678	83	reverse
GI5K-1147	1226862	1227752	83	reverse
GI5K-3490	3855216	3856250	83	reverse
GI5K-3680	4060397	4061686	83	reverse
GI5K-4844	5303917	5304162	83	reverse
GI5K-5805	6364967	6366007	83	reverse
GI5K-11	14236	15123	84	forward
GI5K-430	465247	465783	84	forward
GI5K-455	501918	503396	84	forward
GI5K-481	535279	535983	84	forward
GI5K-1844	1984681	1985211	84	forward
GI5K-2121	2292047	2293036	84	forward
GI5K-3109	3438067	3438705	84	forward
GI5K-4317	4724553	4726598	84	forward
GI5K-4565	5018512	5019318	84	forward
GI5K-875	940586	941890	84	reverse
GI5K-1098	1177638	1178033	84	reverse
GI5K-2315	2465327	2465503	84	reverse
GI5K-3570	3938762	3939001	84	reverse
GI5K-4192	4599879	4600403	84	reverse
GI5K-4225	4626261	4628504	84	reverse
GI5K-4586	5040371	5041156	84	reverse
GI5K-4928	5393100	5393717	84	reverse
GI5K-843	901559	902767	85	forward
GI5K-1598	1721937	1724612	85	forward
GI5K-2143	2314953	2315591	85	forward
GI5K-2818	3106367	3108091	85	forward
GI5K-3590	3961719	3962453	85	forward
GI5K-3788	4181255	4182928	85	forward
GI5K-5695	6251036	6252355	85	forward
GI5K-5807	6366948	6368201	85	forward
GI5K-307	342926	344032	85	reverse
GI5K-2193	2365530	2365985	85	reverse
GI5K-3125	3456053	3457216	85	reverse
GI5K-4056	4463447	4464871	85	reverse
GI5K-4366	4775461	4775901	85	reverse
GI5K-4667	5125128	5125745	85	reverse
GI5K-4913	5377450	5378394	85	reverse
GI5K-2685	2908569	2909483	86	forward
GI5K-4177	4588146	4588991	86	forward
GI5K-1202	1280276	1280671	86	reverse
GI5K-1521	1642132	1643358	86	reverse
GI5K-1749	1894225	1895160	86	reverse
GI5K-2173	2347241	2347729	86	reverse
GI5K-2443	2611967	2612437	86	reverse
GI5K-2901	3198432	3200078	86	reverse
GI5K-3132	3462683	3464203	86	reverse
GI5K-3799	4194004	4195932	86	reverse
GI5K-3880	4282067	4283848	86	reverse
GI5K-5276	5768719	5770059	86	reverse
GI5K-5937	6507745	6508989	86	reverse
GI5K-697	741151	741223	87	forward
GI5K-894	961011	961751	87	forward
GI5K-1873	2014754	2017519	87	forward
GI5K-2224	2395547	2395619	87	forward
GI5K-3237	3582626	3583180	87	forward
GI5K-4321	4732365	4732988	87	forward
GI5K-186	206784	208394	87	reverse
GI5K-555	606248	606856	87	reverse
GI5K-1095	1175325	1176155	87	reverse
GI5K-2458	2629899	2630873	87	reverse
GI5K-2994	3299517	3300263	87	reverse
GI5K-3032	3341401	3343233	87	reverse
GI5K-69	78396	78671	88	forward
GI5K-84	97777	98811	88	forward
GI5K-1132	1212920	1213672	88	forward
GI5K-1667	1790076	1792214	88	forward
GI5K-1923	2072879	2073736	88	forward
GI5K-2645	2839486	2840400	88	forward
GI5K-2897	3193841	3195094	88	forward
GI5K-3225	3570750	3571139	88	forward
GI5K-4855	5313527	5314075	88	forward
GI5K-5251	5743847	5744143	88	forward
GI5K-5722	6278118	6278729	88	forward
GI5K-409	445366	446505	88	reverse
GI5K-913	983821	984525	88	reverse
GI5K-1011	1081151	1082047	88	reverse
GI5K-1412	1513025	1514089	88	reverse
GI5K-1637	1759191	1759337	88	reverse
GI5K-2927	3228608	3230203	88	reverse
GI5K-3463	3819680	3819820	88	reverse
GI5K-3574	3945179	3946336	88	reverse
GI5K-3673	4052941	4053681	88	reverse
GI5K-3959	4357867	4359048	88	reverse
GI5K-538	591645	591902	89	forward
GI5K-1425	1524359	1525681	89	forward
GI5K-1673	1799776	1800066	89	forward
GI5K-1800	1945934	1947589	89	forward
GI5K-2325	2474142	2474498	89	forward
GI5K-2573	2757361	2757996	89	forward
GI5K-5100	5585136	5585516	89	forward
GI5K-5731	6285895	6287970	89	forward
GI5K-898	967444	968133	89	reverse
GI5K-1015	1085653	1086387	89	reverse
GI5K-3250	3604857	3605066	89	reverse
GI5K-4716	5173724	5174329	89	reverse
GI5K-5132	5619127	5621040	89	reverse
GI5K-5150	5639111	5640004	89	reverse
GI5K-646	696088	696198	90	forward
GI5K-2028	2196186	2196560	90	forward
GI5K-2412	2574563	2575900	90	forward
GI5K-2488	2661144	2664122	90	forward
GI5K-5404	5927048	5928325	90	forward
GI5K-1581	1704093	1705499	90	reverse
GI5K-2203	2375865	2376635	90	reverse
GI5K-3665	4046909	4047325	90	reverse
GI5K-4008	4418774	4419622	90	reverse
GI5K-5407	5929818	5930585	90	reverse
GI5K-5518	6059020	6059772	90	reverse
GI5K-5688	6243935	6245008	90	reverse
GI5K-333	370829	372223	91	forward
GI5K-754	798202	799926	91	forward
GI5K-3203	3545631	3546311	91	forward
GI5K-3263	3619542	3619763	91	forward
GI5K-4835	5294580	5294834	91	forward
GI5K-5069	5552437	5553999	91	forward
GI5K-5400	5919211	5920827	91	forward
GI5K-248	273633	273920	91	reverse
GI5K-985	1053401	1053553	91	reverse
GI5K-1144	1223012	1224022	91	reverse
GI5K-1675	1801165	1802331	91	reverse
GI5K-3027	3335723	3338374	91	reverse
GI5K-3670	4050173	4051063	91	reverse
GI5K-4250	4656944	4657447	91	reverse
GI5K-4436	4852842	4853291	91	reverse
GI5K-169	189058	190464	92	forward
GI5K-238	263577	265481	92	forward
GI5K-1149	1228936	1229070	92	forward
GI5K-1862	2003686	2004846	92	forward
GI5K-1907	2055894	2056331	92	forward
GI5K-3872	4271307	4272224	92	forward
GI5K-4219	4621406	4621732	92	forward
GI5K-4373	4782285	4783181	92	forward
GI5K-4475	4899424	4900203	92	forward
GI5K-5105	5593775	5594068	92	forward
GI5K-439	480769	481491	92	reverse
GI5K-591	638309	638644	92	reverse
GI5K-853	912528	913832	92	reverse
GI5K-1134	1214715	1215719	92	reverse
GI5K-2989	3293335	3293907	92	reverse
GI5K-3605	3976270	3978654	92	reverse
GI5K-4038	4445150	4446298	92	reverse
GI5K-4765	5233511	5234050	92	reverse
GI5K-5926	6498135	6499163	92	reverse
GI5K-1530	1652656	1653462	93	forward
GI5K-2259	2424932	2425528	93	forward
GI5K-2669	2890441	2891817	93	forward
GI5K-3713	4098409	4099920	93	forward
GI5K-4734	5195069	5196682	93	forward
GI5K-5099	5584191	5585042	93	forward
GI5K-5527	6064672	6065778	93	forward
GI5K-5808	6368287	6369537	93	forward
GI5K-5810	6369948	6372965	93	forward
GI5K-785	839129	840448	93	reverse
GI5K-1164	1244524	1244649	93	reverse
GI5K-1812	1958113	1958847	93	reverse
GI5K-3320	3679967	3680608	93	reverse
GI5K-4139	4552978	4553064	93	reverse
GI5K-4575	5029232	5029843	93	reverse
GI5K-5116	5604020	5604093	93	reverse
GI5K-3285	3640779	3641216	94	forward
GI5K-3558	3927801	3928352	94	forward
GI5K-4020	4429321	4430310	94	forward
GI5K-4985	5466256	5467254	94	forward
GI5K-5396	5912407	5915106	94	forward
GI5K-5433	5964522	5965865	94	forward
GI5K-460	508105	509472	94	reverse
GI5K-606	656028	656534	94	reverse
GI5K-1076	1154465	1156819	94	reverse
GI5K-1081	1160401	1161378	94	reverse
GI5K-1093	1174167	1174823	94	reverse
GI5K-1355	1450941	1452146	94	reverse
GI5K-3671	4051155	4051943	94	reverse
GI5K-4676	5134388	5135482	94	reverse
GI5K-5176	5658630	5659247	94	reverse
GI5K-5320	5817176	5818378	94	reverse
GI5K-5583	6123449	6124768	94	reverse
GI5K-5916	6486815	6487573	94	reverse
GI5K-774	823833	824888	95	forward
GI5K-2810	3090172	3090789	95	forward
GI5K-3632	4012138	4013913	95	forward
GI5K-3789	4183014	4184102	95	forward
GI5K-5224	5715852	5716736	95	forward
GI5K-5629	6178839	6179507	95	forward
GI5K-5854	6424234	6424446	95	forward
GI5K-813	867362	868546	95	reverse
GI5K-832	889157	890047	95	reverse
GI5K-2104	2277092	2277400	95	reverse
GI5K-3782	4176124	4176918	95	reverse
GI5K-4159	4572629	4575148	95	reverse
GI5K-5110	5597582	5597851	95	reverse
GI5K-5318	5816026	5816211	95	reverse
GI5K-5751	6305306	6306034	95	reverse
GI5K-1323	1417317	1418030	96	forward
GI5K-1744	1888121	1888975	96	forward
GI5K-2165	2338187	2339080	96	forward
GI5K-2736	3007822	3008742	96	forward
GI5K-5102	5587464	5589401	96	forward
GI5K-835	893727	894983	96	reverse
GI5K-2795	3075622	3076974	96	reverse
GI5K-2973	3279080	3279214	96	reverse
GI5K-4917	5382270	5383208	96	reverse
GI5K-5478	6012156	6013685	96	reverse
GI5K-2321	2469972	2470328	97	forward
GI5K-5565	6107697	6108110	97	forward
GI5K-5838	6406232	6406660	97	forward
GI5K-594	640410	640483	97	reverse
GI5K-847	905308	906723	97	reverse
GI5K-1620	1746215	1746985	97	reverse
GI5K-2701	2940949	2941629	97	reverse
GI5K-3412	3775762	3776592	97	reverse
GI5K-5198	5685179	5685955	97	reverse
GI5K-334	372315	372980	98	forward
GI5K-1576	1700492	1701388	98	forward
GI5K-2177	2350962	2352392	98	forward
GI5K-3066	3390035	3390499	98	forward
GI5K-4393	4812268	4812672	98	forward
GI5K-1446	1549571	1549993	98	reverse
GI5K-2381	2539430	2541670	98	reverse
GI5K-4082	4494381	4496291	98	reverse
GI5K-4102	4512895	4513542	98	reverse
GI5K-4932	5395520	5397973	98	reverse
GI5K-708	754693	755064	99	forward
GI5K-895	961839	964895	99	forward
GI5K-2960	3261934	3264084	99	forward
GI5K-4767	5234279	5235982	99	forward
GI5K-631	685467	685781	99	reverse
GI5K-673	719519	720166	99	reverse
GI5K-793	848003	848746	99	reverse
GI5K-1790	1937290	1937691	99	reverse
GI5K-2350	2507551	2508237	99	reverse
GI5K-2860	3151011	3151997	99	reverse
GI5K-4422	4839255	4839950	99	reverse
GI5K-4576	5029937	5031217	99	reverse
GI5K-4579	5033108	5033878	99	reverse
GI5K-5590	6132678	6133832	99	reverse
GI5K-38	39223	40110	100	forward
GI5K-123	138130	138816	100	forward
GI5K-1851	1992306	1993568	100	forward
GI5K-2330	2478590	2478874	100	forward
GI5K-4036	4444633	4444824	100	forward
GI5K-4413	4829610	4830554	100	forward
GI5K-608	658179	659450	100	reverse
GI5K-1007	1078614	1079006	100	reverse
GI5K-1078	1157864	1158373	100	reverse
GI5K-1548	1675921	1676673	100	reverse
GI5K-2402	2565968	2566324	100	reverse
[truncated: 3,053 more rows]

## Sheet: PA14GenesOverlapping
Pseudomonas aeruginosa UCBPP-PA14 Overlapping between genes
Data source: biocyc.org v20.5
Description of Columns
1.- Gene name
2.- Columns 2 and 3 contains the start and end gene coordinates
4.-Distance in nucleotides between the end of gene 1 and the beggining of gene 2
5.-Transcription-Direction (strand)
Gene name	Left-End-Position	Right-End-Position	Dist_Gen2	TranscriptionreverseDirection
GI5K-5914	6486029	6486730	-188	forward
GI5K-2521	2700661	2701278	-109	reverse
GI5K-4449	4862635	4863513	-100	reverse
GI5K-2524	2704176	2705093	-83	reverse
GI5K-1248	1328012	1328974	-80	forward
GI5K-99	115534	115983	-71	forward
GI5K-1814	1959439	1960494	-71	reverse
GI5K-3141	3471184	3473829	-71	reverse
GI5K-1140	1220135	1221262	-70	reverse
GI5K-5834	6397997	6398788	-70	reverse
GI5K-5360	5866676	5868988	-64	reverse
GI5K-4141	4553897	4554655	-62	reverse
GI5K-1719	1860650	1861465	-61	forward
GI5K-3221	3565650	3566924	-53	forward
GI5K-2526	2705903	2707231	-52	reverse
GI5K-4456	4878789	4880135	-46	reverse
GI5K-1010	1080409	1081194	-44	reverse
GI5K-1162	1243940	1244128	-41	forward
GI5K-3408	3772038	3772241	-38	reverse
GI5K-90	103012	104871	-37	forward
GI5K-2750	3023891	3024907	-37	reverse
GI5K-3466	3824071	3825078	-37	reverse
GI5K-2787	3066463	3067299	-35	forward
GI5K-1390	1490467	1490715	-35	reverse
GI5K-645	695775	696119	-32	forward
GI5K-2393	2560163	2560597	-32	forward
GI5K-1226	1304052	1304930	-29	forward
GI5K-4028	4435431	4436738	-29	forward
GI5K-3127	3459133	3460278	-29	reverse
GI5K-113	129723	130517	-26	forward
GI5K-648	698536	699408	-26	forward
GI5K-905	975501	976991	-26	forward
GI5K-2335	2488133	2489428	-26	forward
GI5K-528	584567	585082	-26	reverse
GI5K-5689	6245099	6245452	-26	reverse
GI5K-4512	4947187	4948602	-25	forward
GI5K-5189	5676805	5678040	-25	forward
GI5K-4060	4472308	4472970	-25	reverse
GI5K-1885	2030647	2031909	-23	forward
GI5K-1974	2135468	2138314	-23	forward
GI5K-1977	2142437	2143804	-23	forward
GI5K-4874	5335128	5336633	-23	forward
GI5K-3695	4074936	4076381	-23	reverse
GI5K-4151	4563788	4564390	-23	reverse
GI5K-3585	3956148	3958583	-22	forward
GI5K-5261	5751808	5752497	-22	forward
GI5K-3401	3768667	3769311	-22	reverse
GI5K-26	27667	28653	-20	forward
GI5K-2324	2473859	2474161	-20	forward
GI5K-2893	3189302	3189946	-20	forward
GI5K-3972	4372889	4373218	-20	forward
GI5K-615	665301	666593	-20	reverse
GI5K-3418	3779963	3781135	-20	reverse
GI5K-3427	3786451	3786729	-20	reverse
GI5K-1807	1954245	1954808	-19	reverse
GI5K-5208	5695402	5696256	-19	reverse
GI5K-264	294101	297238	-17	forward
GI5K-2939	3240498	3241922	-17	forward
GI5K-3228	3573078	3574487	-17	forward
GI5K-3282	3637871	3639529	-17	forward
GI5K-4504	4941752	4942201	-17	forward
GI5K-4789	5255206	5255913	-17	forward
GI5K-4873	5334260	5335144	-17	forward
GI5K-5093	5575782	5575958	-17	forward
GI5K-2751	3024871	3026664	-17	reverse
GI5K-2769	3046079	3046732	-17	reverse
GI5K-2993	3296915	3299533	-17	reverse
GI5K-3028	3338466	3339314	-17	reverse
GI5K-3124	3454285	3456069	-17	reverse
GI5K-4133	4546004	4546870	-17	reverse
GI5K-4411	4828647	4829099	-17	reverse
GI5K-5383	5893317	5894453	-17	reverse
GI5K-5842	6410034	6411161	-17	reverse
GI5K-3077	3404017	3404775	-16	forward
GI5K-4849	5308021	5308776	-16	forward
GI5K-3017	3325268	3326026	-16	reverse
GI5K-1573	1698525	1698914	-14	forward
GI5K-1642	1763497	1766208	-14	forward
GI5K-1858	2000159	2001628	-14	forward
GI5K-2405	2569368	2569625	-14	forward
GI5K-3638	4020099	4020950	-14	forward
GI5K-3645	4027729	4028919	-14	forward
GI5K-4341	4752288	4753559	-14	forward
GI5K-4557	5010943	5011923	-14	forward
GI5K-4697	5154424	5154996	-14	forward
GI5K-180	200535	201020	-14	reverse
GI5K-1763	1907066	1907863	-14	reverse
GI5K-2693	2929123	2930106	-14	reverse
GI5K-2826	3116940	3117575	-14	reverse
GI5K-3024	3332168	3333364	-14	reverse
GI5K-3248	3601871	3604201	-14	reverse
GI5K-3426	3786093	3786464	-14	reverse
GI5K-4498	4937352	4937945	-14	reverse
GI5K-5052	5534575	5535195	-14	reverse
GI5K-1192	1269092	1270240	-13	forward
GI5K-1396	1495581	1496648	-13	forward
GI5K-2347	2504847	2505386	-13	forward
GI5K-3430	3789086	3789562	-13	forward
GI5K-4016	4425603	4426871	-13	forward
GI5K-5195	5682853	5683221	-13	reverse
GI5K-5326	5824507	5824974	-13	reverse
GI5K-514	567171	568049	-11	forward
GI5K-1037	1108535	1109326	-11	forward
GI5K-1632	1755728	1756444	-11	forward
GI5K-2390	2556397	2557200	-11	forward
GI5K-2396	2561398	2561988	-11	forward
GI5K-2547	2727061	2727486	-11	forward
GI5K-2681	2904651	2906825	-11	forward
GI5K-3473	3832600	3834642	-11	forward
GI5K-3890	4295514	4296665	-11	forward
GI5K-4816	5280280	5281605	-11	forward
GI5K-4857	5317504	5318850	-11	forward
GI5K-4904	5365571	5365855	-11	forward
GI5K-5046	5524691	5525989	-11	forward
GI5K-5165	5652879	5653361	-11	forward
GI5K-95	110972	111205	-11	reverse
GI5K-457	504138	505409	-11	reverse
GI5K-588	633827	634174	-11	reverse
GI5K-993	1062074	1062556	-11	reverse
GI5K-2876	3170054	3171382	-11	reverse
GI5K-2991	3294854	3295567	-11	reverse
GI5K-3239	3583955	3585142	-11	reverse
GI5K-3240	3585132	3587303	-11	reverse
GI5K-4046	4452555	4453910	-11	reverse
GI5K-4618	5074423	5075703	-11	reverse
GI5K-4651	5108626	5109699	-11	reverse
GI5K-4948	5414255	5415532	-11	reverse
GI5K-5022	5502057	5502854	-11	reverse
GI5K-5651	6202982	6203863	-11	reverse
GI5K-603	653893	654246	-10	forward
GI5K-1252	1332509	1333900	-10	forward
GI5K-1634	1757597	1758154	-10	forward
GI5K-4801	5264247	5264522	-10	forward
GI5K-525	581088	582569	-10	reverse
GI5K-1612	1737342	1738169	-10	reverse
GI5K-2874	3167743	3168846	-10	reverse
GI5K-5348	5851044	5851502	-10	reverse
GI5K-91	104835	105881	-8	forward
GI5K-206	229930	230229	-8	forward
GI5K-433	468864	476294	-8	forward
GI5K-517	570781	571986	-8	forward
GI5K-518	571979	572701	-8	forward
GI5K-547	598668	598904	-8	forward
GI5K-639	690096	690983	-8	forward
GI5K-658	703411	705246	-8	forward
GI5K-757	802793	803968	-8	forward
GI5K-908	978924	979808	-8	forward
GI5K-925	992856	993824	-8	forward
GI5K-1128	1210134	1210835	-8	forward
GI5K-1158	1239195	1240313	-8	forward
GI5K-1245	1321218	1323335	-8	forward
GI5K-1316	1407790	1409058	-8	forward
GI5K-1588	1714667	1715764	-8	forward
GI5K-1852	1993669	1994601	-8	forward
GI5K-1876	2019858	2020967	-8	forward
GI5K-2042	2213186	2214397	-8	forward
GI5K-2046	2216466	2217689	-8	forward
GI5K-2053	2222289	2223539	-8	forward
GI5K-2066	2237024	2237980	-8	forward
GI5K-2067	2237973	2238665	-8	forward
GI5K-2079	2247669	2248301	-8	forward
GI5K-2086	2253672	2254304	-8	forward
GI5K-2138	2310252	2311004	-8	forward
GI5K-2575	2759882	2761195	-8	forward
GI5K-2705	2945626	2946051	-8	forward
GI5K-2956	3255048	3256799	-8	forward
GI5K-2957	3256792	3258846	-8	forward
GI5K-3586	3958562	3958771	-8	forward
GI5K-3610	3985489	3986943	-8	forward
GI5K-3971	4372405	4372896	-8	forward
GI5K-4214	4618794	4619462	-8	forward
GI5K-4245	4653174	4653635	-8	forward
GI5K-4310	4717492	4718886	-8	forward
GI5K-4420	4836582	4838099	-8	forward
GI5K-4461	4885877	4886899	-8	forward
GI5K-4549	5003033	5004148	-8	forward
GI5K-4793	5258160	5258417	-8	forward
GI5K-4794	5258410	5258904	-8	forward
GI5K-5445	5977178	5977582	-8	forward
GI5K-5894	6465920	6466729	-8	forward
GI5K-66	75076	75741	-8	reverse
GI5K-72	81025	82737	-8	reverse
GI5K-272	305950	306903	-8	reverse
GI5K-276	311665	312174	-8	reverse
GI5K-361	400558	401937	-8	reverse
GI5K-390	429277	430764	-8	reverse
GI5K-529	585057	585500	-8	reverse
GI5K-782	835206	836696	-8	reverse
GI5K-1071	1150420	1150803	-8	reverse
GI5K-1413	1514178	1514948	-8	reverse
GI5K-1511	1628499	1629215	-8	reverse
GI5K-1680	1804964	1806220	-8	reverse
GI5K-1968	2125225	2126247	-8	reverse
GI5K-2134	2305495	2306595	-8	reverse
GI5K-2437	2606193	2606618	-8	reverse
GI5K-2852	3142300	3143250	-8	reverse
GI5K-2856	3146722	3147369	-8	reverse
GI5K-2908	3206340	3208643	-8	reverse
GI5K-2916	3217796	3218755	-8	reverse
GI5K-3251	3605156	3607432	-8	reverse
GI5K-3848	4244368	4244889	-8	reverse
GI5K-3849	4244882	4246354	-8	reverse
GI5K-3850	4246347	4247342	-8	reverse
GI5K-4059	4467231	4472315	-8	reverse
GI5K-4108	4521112	4521921	-8	reverse
GI5K-4155	4568032	4569078	-8	reverse
GI5K-4251	4657539	4657814	-8	reverse
GI5K-4304	4711781	4713571	-8	reverse
GI5K-4398	4816128	4816874	-8	reverse
GI5K-4400	4817629	4818546	-8	reverse
GI5K-4415	4831499	4832881	-8	reverse
GI5K-4569	5022880	5023806	-8	reverse
GI5K-4650	5107191	5108633	-8	reverse
GI5K-4655	5113330	5114706	-8	reverse
GI5K-4708	5162131	5163507	-8	reverse
GI5K-4914	5378480	5378920	-8	reverse
GI5K-4915	5378913	5379422	-8	reverse
GI5K-4949	5415522	5417003	-8	reverse
GI5K-4978	5451364	5451903	-8	reverse
GI5K-5051	5532276	5534582	-8	reverse
GI5K-5137	5624704	5625009	-8	reverse
GI5K-5271	5761035	5762057	-8	reverse
GI5K-5453	5982861	5983595	-8	reverse
GI5K-5456	5985654	5988239	-8	reverse
GI5K-5471	6004374	6005174	-8	reverse
GI5K-1065	1143008	1143898	-7	forward
GI5K-1370	1466364	1467119	-7	forward
GI5K-1727	1868892	1869503	-7	forward
GI5K-3593	3964572	3964940	-7	forward
GI5K-3911	4316081	4317343	-7	forward
GI5K-5849	6418319	6419947	-7	forward
GI5K-5852	6422099	6423241	-7	forward
GI5K-527	583410	584573	-7	reverse
GI5K-1696	1828780	1829613	-7	reverse
GI5K-3550	3922017	3922385	-7	reverse
GI5K-4153	4566077	4566982	-7	reverse
GI5K-4156	4569071	4569922	-7	reverse
GI5K-5023	5502844	5503602	-7	reverse
GI5K-5382	5892427	5893323	-7	reverse
GI5K-3	3169	4278	-4	forward
GI5K-27	28634	29920	-4	forward
GI5K-68	76354	78399	-4	forward
GI5K-89	102506	103015	-4	forward
GI5K-100	115913	117112	-4	forward
GI5K-152	168212	168757	-4	forward
GI5K-159	176167	177318	-4	forward
GI5K-160	177315	178385	-4	forward
GI5K-207	230222	231085	-4	forward
GI5K-209	231904	232596	-4	forward
GI5K-222	245632	246483	-4	forward
GI5K-223	246480	247262	-4	forward
GI5K-266	298567	298875	-4	forward
GI5K-349	388412	389683	-4	forward
GI5K-365	405267	406361	-4	forward
GI5K-392	432275	433630	-4	forward
GI5K-419	455375	456748	-4	forward
GI5K-434	476287	477318	-4	forward
GI5K-470	520909	522240	-4	forward
GI5K-546	597970	598671	-4	forward
GI5K-617	669475	670491	-4	forward
GI5K-636	688551	689066	-4	forward
GI5K-638	689773	690099	-4	forward
GI5K-641	691511	693586	-4	forward
GI5K-651	700669	701298	-4	forward
GI5K-652	701295	701657	-4	forward
GI5K-665	713513	713815	-4	forward
GI5K-668	715068	716117	-4	forward
GI5K-692	738405	739343	-4	forward
GI5K-714	760208	760810	-4	forward
GI5K-750	785708	790024	-4	forward
GI5K-751	790021	795450	-4	forward
GI5K-752	795447	796496	-4	forward
GI5K-753	796493	798205	-4	forward
GI5K-849	908648	910321	-4	forward
GI5K-893	958480	961014	-4	forward
GI5K-919	987974	988438	-4	forward
GI5K-923	991885	992361	-4	forward
GI5K-929	995865	996482	-4	forward
GI5K-975	1043998	1045020	-4	forward
GI5K-979	1047620	1048273	-4	forward
GI5K-1001	1071822	1072469	-4	forward
GI5K-1032	1104835	1105704	-4	forward
GI5K-1059	1138820	1139302	-4	forward
GI5K-1062	1140109	1140666	-4	forward
GI5K-1083	1162672	1164162	-4	forward
GI5K-1185	1261203	1261961	-4	forward
GI5K-1186	1261958	1263001	-4	forward
GI5K-1240	1314094	1314369	-4	forward
GI5K-1268	1352746	1353270	-4	forward
GI5K-1315	1407278	1407793	-4	forward
GI5K-1317	1409051	1409740	-4	forward
GI5K-1318	1409737	1412046	-4	forward
GI5K-1326	1420051	1420797	-4	forward
GI5K-1327	1420794	1421699	-4	forward
GI5K-1328	1421696	1422019	-4	forward
GI5K-1350	1446019	1446942	-4	forward
GI5K-1371	1467113	1467928	-4	forward
GI5K-1377	1474612	1475052	-4	forward
GI5K-1395	1495111	1495584	-4	forward
GI5K-1431	1532483	1533280	-4	forward
GI5K-1500	1614329	1615486	-4	forward
GI5K-1501	1615483	1618644	-4	forward
GI5K-1531	1653556	1654416	-4	forward
GI5K-1557	1686813	1687637	-4	forward
GI5K-1562	1691467	1692255	-4	forward
GI5K-1575	1699716	1700495	-4	forward
GI5K-1600	1725533	1727323	-4	forward
GI5K-1601	1727320	1728651	-4	forward
GI5K-1606	1732031	1733203	-4	forward
GI5K-1629	1752884	1753984	-4	forward
GI5K-1630	1753981	1754865	-4	forward
GI5K-1647	1770873	1772030	-4	forward
GI5K-1730	1870475	1871329	-4	forward
GI5K-1737	1877635	1878057	-4	forward
GI5K-1799	1945626	1945937	-4	forward
GI5K-1801	1947679	1949478	-4	forward
GI5K-1821	1965017	1965829	-4	forward
GI5K-1840	1981024	1981911	-4	forward
GI5K-1886	2031887	2033236	-4	forward
GI5K-1890	2038087	2039199	-4	forward
GI5K-1925	2074729	2075601	-4	forward
GI5K-1930	2079898	2081109	-4	forward
GI5K-1937	2088051	2088569	-4	forward
GI5K-1938	2088566	2088955	-4	forward
GI5K-1939	2088952	2089665	-4	forward
GI5K-1940	2089662	2090663	-4	forward
GI5K-1953	2102217	2103197	-4	forward
GI5K-1978	2143782	2144771	-4	forward
GI5K-2011	2175335	2175874	-4	forward
GI5K-2043	2214390	2215175	-4	forward
GI5K-2047	2217682	2218710	-4	forward
GI5K-2058	2228579	2229214	-4	forward
GI5K-2063	2231636	2232100	-4	forward
GI5K-2136	2308172	2309632	-4	forward
GI5K-2137	2309629	2310255	-4	forward
GI5K-2140	2312746	2313594	-4	forward
GI5K-2168	2341041	2341997	-4	forward
GI5K-2169	2341994	2344000	-4	forward
GI5K-2216	2388940	2389425	-4	forward
GI5K-2219	2392375	2393265	-4	forward
GI5K-2239	2407787	2408719	-4	forward
GI5K-2253	2418001	2419185	-4	forward
GI5K-2312	2463228	2463449	-4	forward
GI5K-2334	2485638	2488136	-4	forward
GI5K-2395	2560976	2561401	-4	forward
GI5K-2411	2573895	2574566	-4	forward
GI5K-2571	2751825	2753564	-4	forward
GI5K-2586	2772055	2773335	-4	forward
GI5K-2587	2773332	2776463	-4	forward
GI5K-2588	2776460	2779570	-4	forward
GI5K-2596	2791292	2792659	-4	forward
GI5K-2632	2825911	2826564	-4	forward
GI5K-2637	2831563	2832399	-4	forward
GI5K-2674	2897623	2898636	-4	forward
GI5K-2677	2900290	2902275	-4	forward
GI5K-2682	2906815	2907024	-4	forward
GI5K-2740	3011096	3011566	-4	forward
GI5K-2758	3031802	3032560	-4	forward
GI5K-2759	3032557	3036372	-4	forward
GI5K-2765	3041071	3042255	-4	forward
GI5K-2786	3065399	3066466	-4	forward
GI5K-2788	3067265	3068464	-4	forward
GI5K-2812	3094663	3095751	-4	forward
GI5K-2817	3105621	3106370	-4	forward
GI5K-2820	3108760	3109725	-4	forward
GI5K-2883	3177507	3180521	-4	forward
GI5K-2919	3221381	3221911	-4	forward
GI5K-2958	3258839	3261619	-4	forward
GI5K-2963	3265918	3266856	-4	forward
GI5K-2964	3266853	3267590	-4	forward
GI5K-2965	3267587	3268792	-4	forward
GI5K-3011	3319574	3320317	-4	forward
GI5K-3012	3320314	3321027	-4	forward
GI5K-3048	3367771	3368439	-4	forward
GI5K-3050	3369223	3371043	-4	forward
GI5K-3085	3413042	3413296	-4	forward
GI5K-3103	3430753	3431550	-4	forward
GI5K-3108	3436772	3438070	-4	forward
GI5K-3121	3452091	3452447	-4	forward
GI5K-3159	3491319	3491894	-4	forward
GI5K-3161	3492721	3493212	-4	forward
GI5K-3196	3538047	3538193	-4	forward
GI5K-3204	3546403	3546909	-4	forward
GI5K-3208	3551857	3553068	-4	forward
GI5K-3223	3567590	3570019	-4	forward
GI5K-3224	3570016	3570753	-4	forward
GI5K-3309	3665234	3667063	-4	forward
GI5K-3324	3684343	3686175	-4	forward
GI5K-3429	3787767	3789089	-4	forward
GI5K-3431	3789550	3790668	-4	forward
GI5K-3432	3790665	3791594	-4	forward
GI5K-3434	3792247	3792513	-4	forward
GI5K-3435	3792510	3793298	-4	forward
GI5K-3474	3834632	3835372	-4	forward
GI5K-3520	3887191	3887949	-4	forward
GI5K-3530	3897484	3897975	-4	forward
GI5K-3580	3952211	3952822	-4	forward
GI5K-3581	3952819	3953013	-4	forward
GI5K-3584	3955612	3956151	-4	forward
GI5K-3596	3966078	3967661	-4	forward
GI5K-3617	3995127	3996053	-4	forward
GI5K-3623	4000789	4003317	-4	forward
GI5K-3624	4003314	4005023	-4	forward
GI5K-3661	4042922	4044400	-4	forward
GI5K-3755	4146826	4147941	-4	forward
GI5K-3785	4179035	4179781	-4	forward
GI5K-3786	4179778	4180446	-4	forward
GI5K-3858	4256213	4257157	-4	forward
GI5K-3869	4268733	4269377	-4	forward
GI5K-3889	4294069	4295517	-4	forward
GI5K-3908	4312055	4312390	-4	forward
GI5K-3910	4314228	4316084	-4	forward
GI5K-3912	4317337	4317951	-4	forward
GI5K-3913	4317948	4318826	-4	forward
GI5K-3914	4318823	4320190	-4	forward
GI5K-3917	4322421	4324019	-4	forward
GI5K-3918	4324016	4324975	-4	forward
GI5K-3919	4324972	4326201	-4	forward
GI5K-4077	4488332	4489255	-4	forward
GI5K-4078	4489252	4490505	-4	forward
GI5K-4176	4587841	4588149	-4	forward
GI5K-4178	4589078	4589455	-4	forward
GI5K-4208	4614009	4614362	-4	forward
GI5K-4292	4699090	4699446	-4	forward
GI5K-4355	4764566	4765000	-4	forward
GI5K-4357	4766533	4767828	-4	forward
GI5K-4396	4814332	4815072	-4	forward
GI5K-4438	4853789	4854865	-4	forward
GI5K-4462	4886892	4887956	-4	forward
GI5K-4550	5004141	5004902	-4	forward
GI5K-4556	5010149	5010946	-4	forward
GI5K-4558	5011910	5013481	-4	forward
GI5K-4559	5013478	5014755	-4	forward
GI5K-4560	5014752	5015759	-4	forward
GI5K-4662	5121267	5123081	-4	forward
GI5K-4664	5123484	5124077	-4	forward
GI5K-4769	5237206	5238078	-4	forward
GI5K-4770	5238075	5238686	-4	forward
GI5K-4776	5240946	5241575	-4	forward
GI5K-4784	5252505	5253185	-4	forward
GI5K-4785	5253182	5253679	-4	forward
GI5K-4786	5253676	5253825	-4	forward
GI5K-4788	5254508	5255209	-4	forward
GI5K-4790	5255897	5256121	-4	forward
GI5K-4792	5257636	5258163	-4	forward
GI5K-4796	5259130	5260146	-4	forward
GI5K-4797	5260143	5260397	-4	forward
GI5K-4799	5262161	5262928	-4	forward
GI5K-4800	5262925	5264250	-4	forward
GI5K-4810	5270777	5272666	-4	forward
GI5K-4820	5284818	5285348	-4	forward
GI5K-4832	5293173	5293808	-4	forward
GI5K-4850	5308761	5309342	-4	forward
GI5K-4868	5332241	5332600	-4	forward
GI5K-4871	5333221	5333607	-4	forward
GI5K-4872	5333604	5334263	-4	forward
GI5K-4876	5337054	5339996	-4	forward
GI5K-4877	5339993	5340277	-4	forward
GI5K-4883	5344126	5344467	-4	forward
GI5K-4889	5348012	5350435	-4	forward
GI5K-4895	5355824	5357743	-4	forward
GI5K-4941	5406347	5407159	-4	forward
GI5K-5012	5489509	5491881	-4	forward
GI5K-5019	5498935	5499834	-4	forward
GI5K-5047	5525979	5526674	-4	forward
GI5K-5087	5569828	5571123	-4	forward
GI5K-5096	5581256	5582659	-4	forward
GI5K-5098	5583394	5584194	-4	forward
GI5K-5160	5649525	5649830	-4	forward
GI5K-5166	5653351	5653728	-4	forward
GI5K-5226	5718313	5719311	-4	forward
GI5K-5234	5728528	5730117	-4	forward
GI5K-5235	5730114	5731193	-4	forward
GI5K-5267	5758621	5759124	-4	forward
GI5K-5339	5840480	5842018	-4	forward
GI5K-5370	5877893	5879068	-4	forward
GI5K-5443	5974838	5975464	-4	forward
GI5K-5448	5978198	5978623	-4	forward
GI5K-5449	5978620	5979423	-4	forward
GI5K-5502	6043190	6043711	-4	forward
GI5K-5526	6064439	6064675	-4	forward
GI5K-5528	6065872	6068124	-4	forward
GI5K-5536	6074299	6074994	-4	forward
GI5K-5544	6082452	6083510	-4	forward
GI5K-5545	6083507	6084415	-4	forward
GI5K-5548	6085898	6087736	-4	forward
GI5K-5551	6090376	6091008	-4	forward
GI5K-5610	6155877	6156188	-4	forward
GI5K-5666	6217527	6218438	-4	forward
GI5K-5730	6284966	6285898	-4	forward
GI5K-5796	6356438	6356671	-4	forward
GI5K-5797	6356668	6357000	-4	forward
GI5K-5809	6369631	6369951	-4	forward
GI5K-5850	6419941	6421242	-4	forward
GI5K-5851	6421239	6422102	-4	forward
GI5K-5857	6425306	6425638	-4	forward
GI5K-5860	6428188	6429132	-4	forward
GI5K-5877	6446259	6447608	-4	forward
GI5K-5901	6472155	6472808	-4	forward
GI5K-5934	6504907	6505803	-4	forward
GI5K-17	18789	20093	-4	reverse
GI5K-36	37108	37914	-4	reverse
GI5K-74	83929	84648	-4	reverse
GI5K-77	88489	89169	-4	reverse
GI5K-82	95911	96453	-4	reverse
GI5K-127	141481	141762	-4	reverse
GI5K-187	208482	209321	-4	reverse
GI5K-240	266282	267136	-4	reverse
GI5K-258	282565	284715	-4	reverse
GI5K-270	303810	304676	-4	reverse
GI5K-340	378539	379327	-4	reverse
GI5K-341	379324	380253	-4	reverse
GI5K-406	443597	444190	-4	reverse
GI5K-421	458157	459428	-4	reverse
GI5K-459	506831	508108	-4	reverse
GI5K-490	545340	546311	-4	reverse
GI5K-530	585493	586017	-4	reverse
GI5K-532	586475	587653	-4	reverse
GI5K-533	587650	588009	-4	reverse
GI5K-607	656629	658182	-4	reverse
GI5K-614	664318	665304	-4	reverse
GI5K-745	780267	781697	-4	reverse
GI5K-747	781999	782754	-4	reverse
GI5K-762	808376	810259	-4	reverse
GI5K-763	810256	810879	-4	reverse
GI5K-768	814846	816309	-4	reverse
GI5K-816	870437	871468	-4	reverse
GI5K-825	881150	882262	-4	reverse
GI5K-828	884308	885348	-4	reverse
GI5K-856	915383	916843	-4	reverse
GI5K-877	942715	943773	-4	reverse
GI5K-888	953365	954126	-4	reverse
GI5K-900	971409	971615	-4	reverse
GI5K-917	986659	987321	-4	reverse
GI5K-933	999811	1000698	-4	reverse
GI5K-938	1005317	1006051	-4	reverse
GI5K-965	1033659	1034972	-4	reverse
GI5K-992	1061238	1062077	-4	reverse
GI5K-1069	1148922	1149641	-4	reverse
GI5K-1070	1149638	1150423	-4	reverse
GI5K-1072	1150796	1151323	-4	reverse
GI5K-1077	1156914	1157867	-4	reverse
GI5K-1099	1178118	1178777	-4	reverse
GI5K-1154	1234934	1235362	-4	reverse
GI5K-1210	1285902	1287182	-4	reverse
GI5K-1229	1307101	1308090	-4	reverse
GI5K-1230	1308087	1308323	-4	reverse
GI5K-1262	1347726	1348748	-4	reverse
GI5K-1354	1450522	1450944	-4	reverse
GI5K-1464	1569445	1570839	-4	reverse
GI5K-1465	1570836	1571249	-4	reverse
GI5K-1466	1571246	1571593	-4	reverse
GI5K-1467	1571590	1573239	-4	reverse
GI5K-1468	1573236	1574123	-4	reverse
GI5K-1469	1574120	1576108	-4	reverse
GI5K-1470	1576105	1577124	-4	reverse
GI5K-1479	1588212	1589684	-4	reverse
GI5K-1495	1609324	1609998	-4	reverse
GI5K-1510	1627864	1628502	-4	reverse
GI5K-1514	1630889	1633213	-4	reverse
GI5K-1515	1633210	1633776	-4	reverse
GI5K-1520	1641698	1642135	-4	reverse
GI5K-1535	1658203	1658661	-4	reverse
GI5K-1544	1670289	1671485	-4	reverse
GI5K-1613	1738160	1739074	-4	reverse
GI5K-1614	1739071	1740357	-4	reverse
GI5K-1679	1804542	1804967	-4	reverse
GI5K-1682	1807129	1808457	-4	reverse
GI5K-1683	1808454	1809620	-4	reverse
GI5K-1687	1819004	1820782	-4	reverse
GI5K-1695	1828013	1828783	-4	reverse
GI5K-1697	1829607	1830410	-4	reverse
GI5K-1710	1846437	1846907	-4	reverse
GI5K-1764	1907850	1908689	-4	reverse
GI5K-1771	1914545	1914799	-4	reverse
GI5K-1785	1934977	1935117	-4	reverse
GI5K-1826	1969975	1970619	-4	reverse
GI5K-1828	1971556	1972350	-4	reverse
GI5K-1869	2010471	2011151	-4	reverse
GI5K-1946	2093120	2094157	-4	reverse
GI5K-1962	2115489	2116784	-4	reverse
GI5K-1966	2121840	2123471	-4	reverse
GI5K-1967	2123468	2125228	-4	reverse
GI5K-1969	2126240	2126734	-4	reverse
GI5K-2050	2220550	2221272	-4	reverse
GI5K-2093	2261099	2261851	-4	reverse
GI5K-2117	2288477	2289190	-4	reverse
GI5K-2128	2298532	2299563	-4	reverse
GI5K-2129	2299560	2300531	-4	reverse
GI5K-2133	2304770	2305498	-4	reverse
GI5K-2205	2377734	2379173	-4	reverse
GI5K-2241	2409545	2410876	-4	reverse
GI5K-2247	2414011	2414592	-4	reverse
GI5K-2270	2435738	2436079	-4	reverse
GI5K-2339	2492593	2493942	-4	reverse
GI5K-2421	2587205	2589052	-4	reverse
GI5K-2425	2590475	2591470	-4	reverse
GI5K-2427	2594316	2595665	-4	reverse
GI5K-2435	2604748	2605569	-4	reverse
GI5K-2441	2610179	2610799	-4	reverse
GI5K-2459	2630961	2631944	-4	reverse
GI5K-2460	2631941	2632276	-4	reverse
GI5K-2462	2632578	2632937	-4	reverse
GI5K-2466	2634462	2636045	-4	reverse
GI5K-2503	2679709	2680698	-4	reverse
GI5K-2507	2683111	2683836	-4	reverse
GI5K-2509	2686568	2686960	-4	reverse
GI5K-2510	2686957	2688027	-4	reverse
GI5K-2511	2688024	2688488	-4	reverse
GI5K-2516	2693164	2693907	-4	reverse
GI5K-2518	2697052	2698281	-4	reverse
GI5K-2520	2699666	2700664	-4	reverse
GI5K-2523	2703604	2704179	-4	reverse
GI5K-2539	2718848	2720011	-4	reverse
GI5K-2591	2781439	2782857	-4	reverse
GI5K-2601	2796025	2796516	-4	reverse
GI5K-2614	2808672	2809898	-4	reverse
GI5K-2619	2812739	2814157	-4	reverse
GI5K-2634	2827632	2828954	-4	reverse
GI5K-2658	2876533	2877069	-4	reverse
GI5K-2671	2893079	2893954	-4	reverse
GI5K-2695	2931455	2934685	-4	reverse
GI5K-2710	2950112	2951029	-4	reverse
GI5K-2711	2951026	2951931	-4	reverse
GI5K-2712	2951928	2952683	-4	reverse
GI5K-2714	2953666	2954226	-4	reverse
GI5K-2715	2954223	2954552	-4	reverse
GI5K-2716	2954549	2955088	-4	reverse
GI5K-2770	3046716	3047825	-4	reverse
GI5K-2777	3055176	3056684	-4	reverse
GI5K-2828	3119107	3119769	-4	reverse
GI5K-2829	3119766	3120437	-4	reverse
GI5K-2865	3157347	3158399	-4	reverse
GI5K-2886	3181532	3182437	-4	reverse
GI5K-2899	3196396	3198054	-4	reverse
GI5K-2904	3202155	3202511	-4	reverse
GI5K-2915	3216786	3217799	-4	reverse
GI5K-2929	3231173	3231517	-4	reverse
GI5K-2933	3234675	3236069	-4	reverse
GI5K-2952	3250575	3251351	-4	reverse
GI5K-2967	3269786	3271984	-4	reverse
GI5K-2972	3278592	3279083	-4	reverse
GI5K-2990	3294000	3294857	-4	reverse
GI5K-2992	3295557	3296918	-4	reverse
GI5K-3022	3330603	3331559	-4	reverse
GI5K-3025	3333351	3334634	-4	reverse
GI5K-3029	3339298	3339954	-4	reverse
GI5K-3064	3388251	3389204	-4	reverse
GI5K-3128	3460250	3460528	-4	reverse
GI5K-3181	3517005	3519209	-4	reverse
GI5K-3182	3519206	3520195	-4	reverse
GI5K-3190	3528562	3529038	-4	reverse
GI5K-3213	3556979	3558862	-4	reverse
GI5K-3214	3558859	3559482	-4	reverse
GI5K-3394	3759037	3759837	-4	reverse
GI5K-3403	3769919	3770665	-4	reverse
GI5K-3405	3771000	3771431	-4	reverse
GI5K-3422	3782849	3783283	-4	reverse
GI5K-3423	3783280	3785400	-4	reverse
GI5K-3425	3785731	3786096	-4	reverse
GI5K-3443	3800493	3801038	-4	reverse
GI5K-3444	3801035	3801652	-4	reverse
GI5K-3456	3810500	3811489	-4	reverse
GI5K-3460	3816629	3817960	-4	reverse
GI5K-3510	3877294	3878154	-4	reverse
GI5K-3516	3882913	3883377	-4	reverse
GI5K-3538	3907356	3907802	-4	reverse
GI5K-3652	4035524	4036747	-4	reverse
GI5K-3653	4036744	4037211	-4	reverse
GI5K-3656	4039728	4040216	-4	reverse
GI5K-3657	4040213	4040389	-4	reverse
GI5K-3659	4041267	4041938	-4	reverse
GI5K-3678	4058676	4059419	-4	reverse
GI5K-3687	4068987	4069754	-4	reverse
GI5K-3697	4077152	4080262	-4	reverse
GI5K-3748	4138746	4140104	-4	reverse
GI5K-3762	4158308	4159150	-4	reverse
GI5K-3800	4196019	4197566	-4	reverse
GI5K-3825	4223178	4224161	-4	reverse
GI5K-3831	4227853	4228146	-4	reverse
GI5K-3846	4242735	4243319	-4	reverse
GI5K-3847	4243316	4244371	-4	reverse
GI5K-3851	4247335	4248273	-4	reverse
GI5K-3879	4280772	4282070	-4	reverse
GI5K-3894	4299668	4299925	-4	reverse
GI5K-3904	4307897	4309009	-4	reverse
GI5K-3942	4347632	4347733	-4	reverse
GI5K-3961	4360378	4361397	-4	reverse
GI5K-3967	4369305	4370651	-4	reverse
GI5K-4087	4499207	4499458	-4	reverse
GI5K-4091	4502114	4502461	-4	reverse
GI5K-4092	4502458	4502715	-4	reverse
GI5K-4093	4502712	4503236	-4	reverse
GI5K-4094	4503233	4504732	-4	reverse
GI5K-4135	4549111	4550262	-4	reverse
GI5K-4166	4580547	4580960	-4	reverse
GI5K-4185	4594188	4595486	-4	reverse
GI5K-4264	4667360	4668706	-4	reverse
GI5K-4277	4682103	4683386	-4	reverse
GI5K-4368	4776310	4777830	-4	reverse
GI5K-4401	4818539	4819228	-4	reverse
GI5K-4406	4824045	4824500	-4	reverse
GI5K-4450	4863414	4865318	-4	reverse
GI5K-4452	4866692	4867507	-4	reverse
GI5K-4496	4933538	4934947	-4	reverse
GI5K-4497	4934944	4937355	-4	reverse
GI5K-4507	4943865	4944410	-4	reverse
GI5K-4521	4962745	4964910	-4	reverse
GI5K-4522	4964907	4968644	-4	reverse
GI5K-4537	4986832	4987569	-4	reverse
GI5K-4539	4988487	4989371	-4	reverse
GI5K-4540	4989368	4990633	-4	reverse
GI5K-4584	5038856	5039191	-4	reverse
GI5K-4615	5072714	5072956	-4	reverse
GI5K-4649	5106235	5107194	-4	reverse
GI5K-4657	5116162	5117901	-4	reverse
GI5K-4658	5117898	5118191	-4	reverse
GI5K-4690	5149438	5149746	-4	reverse
GI5K-4726	5182337	5183986	-4	reverse
GI5K-4728	5188560	5189198	-4	reverse
GI5K-4747	5210872	5211801	-4	reverse
GI5K-4748	5211798	5212475	-4	reverse
GI5K-4759	5227647	5228483	-4	reverse
GI5K-4773	5239235	5239924	-4	reverse
GI5K-4774	5239921	5240391	-4	reverse
GI5K-4861	5323630	5324829	-4	reverse
GI5K-4892	5353510	5354049	-4	reverse
GI5K-4901	5362595	5363323	-4	reverse
GI5K-4950	5416996	5418189	-4	reverse
GI5K-4975	5448564	5449142	-4	reverse
GI5K-5015	5494480	5495502	-4	reverse
GI5K-5040	5519564	5520016	-4	reverse
GI5K-5126	5611320	5611796	-4	reverse
GI5K-5169	5655060	5655638	-4	reverse
GI5K-5180	5663163	5665088	-4	reverse
GI5K-5191	5678513	5679949	-4	reverse
GI5K-5192	5679946	5680920	-4	reverse
GI5K-5209	5696238	5697539	-4	reverse
GI5K-5258	5749615	5750382	-4	reverse
GI5K-5264	5755394	5756506	-4	reverse
GI5K-5285	5779337	5780053	-4	reverse
GI5K-5286	5780050	5780922	-4	reverse
GI5K-5312	5809333	5810079	-4	reverse
GI5K-5343	5845884	5846408	-4	reverse
GI5K-5385	5896298	5897776	-4	reverse
GI5K-5386	5897773	5898531	-4	reverse
GI5K-5388	5899262	5900068	-4	reverse
GI5K-5390	5901186	5902250	-4	reverse
GI5K-5420	5949302	5949826	-4	reverse
GI5K-5421	5949823	5950446	-4	reverse
GI5K-5426	5956226	5957665	-4	reverse
GI5K-5458	5990266	5990703	-4	reverse
GI5K-5466	5996863	5997744	-4	reverse
GI5K-5469	5999498	6001735	-4	reverse
GI5K-5472	6005167	6006375	-4	reverse
GI5K-5473	6006372	6007904	-4	reverse
GI5K-5474	6007901	6008731	-4	reverse
GI5K-5484	6020270	6020860	-4	reverse
GI5K-5487	6023214	6023783	-4	reverse
GI5K-5493	6028600	6029994	-4	reverse
GI5K-5523	6062612	6063253	-4	reverse
GI5K-5558	6100299	6101120	-4	reverse
GI5K-5615	6159295	6162045	-4	reverse
GI5K-5642	6190564	6191802	-4	reverse
GI5K-5644	6192956	6193711	-4	reverse
GI5K-5650	6199461	6202985	-4	reverse
GI5K-5843	6411145	6412527	-4	reverse
GI5K-5847	6416029	6417000	-4	reverse
GI5K-5864	6431866	6432480	-4	reverse
GI5K-5881	6450947	6452962	-4	reverse
GI5K-5905	6476342	6477685	-4	reverse
GI5K-5929	6500848	6501489	-4	reverse
GI5K-5938	6509076	6509474	-4	reverse
GI5K-101	117109	118146	-1	forward
GI5K-138	152381	153952	-1	forward
GI5K-197	222031	222339	-1	forward
GI5K-204	227383	229047	-1	forward
GI5K-253	278510	279133	-1	forward
GI5K-393	433627	434298	-1	forward
GI5K-482	536068	536757	-1	forward
GI5K-539	591992	592432	-1	forward
GI5K-548	598897	600078	-1	forward
GI5K-566	616135	618132	-1	forward
GI5K-628	682237	682911	-1	forward
GI5K-664	712461	713513	-1	forward
GI5K-680	725967	727001	-1	forward
GI5K-702	743709	744140	-1	forward
GI5K-720	763287	763700	-1	forward
GI5K-755	800018	802180	-1	forward
GI5K-930	996479	996898	-1	forward
GI5K-962	1031915	1032325	-1	forward
GI5K-969	1038138	1039403	-1	forward
GI5K-978	1047339	1047620	-1	forward
GI5K-1114	1196245	1197924	-1	forward
GI5K-1173	1252142	1252915	-1	forward
GI5K-1375	1472999	1473505	-1	forward
GI5K-1379	1475829	1476965	-1	forward
GI5K-1421	1521988	1522251	-1	forward
GI5K-1461	1563719	1566589	-1	forward
GI5K-1506	1623369	1624802	-1	forward
GI5K-1627	1751797	1752255	-1	forward
GI5K-1628	1752255	1752884	-1	forward
GI5K-1633	1756434	1757597	-1	forward
GI5K-1874	2017607	2018692	-1	forward
GI5K-1877	2020960	2023200	-1	forward
GI5K-1891	2039196	2040149	-1	forward
GI5K-1906	2055247	2055894	-1	forward
GI5K-1934	2084868	2086376	-1	forward
GI5K-1952	2101330	2102217	-1	forward
GI5K-2044	2215172	2215846	-1	forward
GI5K-2059	2229211	2229651	-1	forward
GI5K-2061	2230687	2230872	-1	forward
GI5K-2062	2230872	2231636	-1	forward
GI5K-2076	2244526	2245770	-1	forward
GI5K-2089	2256891	2257640	-1	forward
GI5K-2141	2313591	2313950	-1	forward
GI5K-2167	2340124	2341041	-1	forward
GI5K-2394	2560566	2560976	-1	forward
GI5K-2398	2563101	2564087	-1	forward
GI5K-2409	2573273	2573581	-1	forward
GI5K-2410	2573581	2573895	-1	forward
GI5K-2636	2829794	2831563	-1	forward
GI5K-2801	3081983	3083158	-1	forward
GI5K-2955	3253507	3255048	-1	forward
GI5K-3867	4266315	4268057	-1	forward
GI5K-3916	4321135	4322421	-1	forward
GI5K-3985	4388570	4389721	-1	forward
GI5K-4027	4434859	4435431	-1	forward
GI5K-4112	4523592	4524065	-1	forward
GI5K-4213	4617733	4618794	-1	forward
GI5K-4328	4738624	4738824	-1	forward
GI5K-4440	4855698	4855970	-1	forward
GI5K-4588	5042340	5043095	-1	forward
GI5K-4695	5152896	5153876	-1	forward
GI5K-4698	5154983	5155510	-1	forward
GI5K-4743	5207642	5208616	-1	forward
GI5K-4787	5253822	5254508	-1	forward
GI5K-4795	5258897	5259130	-1	forward
GI5K-4818	5282137	5283717	-1	forward
GI5K-4853	5310109	5312343	-1	forward
GI5K-4875	5336611	5337054	-1	forward
GI5K-4880	5341357	5341788	-1	forward
GI5K-4882	5342744	5344126	-1	forward
GI5K-5009	5487610	5488143	-1	forward
GI5K-5514	6054441	6055751	-1	forward
GI5K-5546	6084412	6085293	-1	forward
GI5K-5893	6465417	6465920	-1	forward
GI5K-5897	6468547	6469554	-1	forward
GI5K-8	10434	12488	-1	reverse
GI5K-73	82730	83929	-1	reverse
GI5K-134	147054	147341	-1	reverse
GI5K-389	428681	429277	-1	reverse
GI5K-424	461077	461511	-1	reverse
GI5K-611	662128	662979	-1	reverse
GI5K-746	781694	781999	-1	reverse
GI5K-833	890143	891558	-1	reverse
GI5K-1087	1168793	1169455	-1	reverse
GI5K-1088	1169455	1170390	-1	reverse
GI5K-1512	1629208	1629852	-1	reverse
GI5K-2002	2168842	2169708	-1	reverse
GI5K-2461	2632273	2632578	-1	reverse
GI5K-2584	2769040	2770365	-1	reverse
GI5K-2729	2998496	3000487	-1	reverse
GI5K-2877	3171372	3172559	-1	reverse
GI5K-2902	3200165	3200932	-1	reverse
GI5K-3082	3409721	3410395	-1	reverse
GI5K-3189	3528236	3528562	-1	reverse
GI5K-3191	3529035	3532880	-1	reverse
GI5K-3241	3587293	3588570	-1	reverse
GI5K-3297	3651137	3651973	-1	reverse
GI5K-3374	3741216	3742163	-1	reverse
GI5K-3404	3770662	3771000	-1	reverse
GI5K-3410	3773504	3775306	-1	reverse
GI5K-3457	3811486	3812214	-1	reverse
GI5K-3489	3854107	3855216	-1	reverse
GI5K-3543	3911275	3912162	-1	reverse
GI5K-3685	4067897	4068673	-1	reverse
GI5K-3806	4202607	4202942	-1	reverse
GI5K-3895	4299922	4301961	-1	reverse
GI5K-3903	4306779	4307897	-1	reverse
GI5K-3940	4345187	4346203	-1	reverse
GI5K-3995	4402698	4403159	-1	reverse
GI5K-4095	4504729	4505067	-1	reverse
GI5K-4130	4542170	4542931	-1	reverse
GI5K-4203	4610827	4611102	-1	reverse
GI5K-4229	4633563	4634900	-1	reverse
GI5K-4367	4775987	4776310	-1	reverse
GI5K-4483	4907697	4908122	-1	reverse
GI5K-4495	4932324	4933538	-1	reverse
GI5K-4595	5048269	5048511	-1	reverse
GI5K-4652	5109689	5110888	-1	reverse
GI5K-4654	5112248	5113330	-1	reverse
GI5K-4656	5114699	5116162	-1	reverse
GI5K-4668	5125831	5126613	-1	reverse
GI5K-4669	5126613	5127824	-1	reverse
GI5K-4693	5150876	5151673	-1	reverse
GI5K-4717	5174419	5174913	-1	reverse
GI5K-4859	5319600	5320295	-1	reverse
GI5K-4893	5354046	5354756	-1	reverse
GI5K-4994	5476364	5476627	-1	reverse
GI5K-5059	5541735	5542343	-1	reverse
GI5K-5066	5548775	5549104	-1	reverse
GI5K-5074	5557200	5557967	-1	reverse
GI5K-5089	5572245	5572952	-1	reverse
GI5K-5302	5796339	5797274	-1	reverse
GI5K-5319	5816307	5817176	-1	reverse
GI5K-5324	5821170	5823071	-1	reverse
GI5K-5344	5846405	5847418	-1	reverse
GI5K-5387	5898528	5899262	-1	reverse
GI5K-5389	5900065	5901186	-1	reverse
GI5K-5422	5950443	5951039	-1	reverse
GI5K-5620	6166506	6167474	-1	reverse
GI5K-5635	6184240	6184818	-1	reverse
GI5K-5728	6283177	6283977	-1	reverse
GI5K-5740	6294043	6295122	-1	reverse
GI5K-5783	6342762	6343184	-1	reverse
GI5K-5844	6412524	6413789	-1	reverse
GI5K-5845	6413789	6414586	-1	reverse
GI5K-5959	6529917	6530561	-1	reverse

## Sheet: PA14TssATG
Pseudomonas aeruginosa UCBPP-PA14 Distance between the beggining of gene and the TSS position
Data source Omri Wurtzel et.al 2012
Description of columns
1.-Transcription start site(TSS) position
2.-Transcription direction(strand)
3.- The columns 3 and 4 are the co-ordinates gene downstream TSS(start and end)
5.-Distance between the TSS position and the beggining to gene
6.-Nucleotide transcription start site
TSS	Strand	Left	Right	Dist_TSS-ATG	TSS seq
8367	reverse	7018	8339	27	C
13469	reverse	10434	13435	33	G
17259	reverse	16923	17240	18	A
21083	reverse	17389	21034	48	A
21706	reverse	21088	21594	111	A
39143	reverse	37108	39119	23	A
63112	reverse	61430	63091	20	A
67006	reverse	66550	66978	27	A
72932	reverse	72417	72833	98	A
75240	reverse	74060	75043	196	A
81545	reverse	80049	80963	581	A
97711	reverse	92696	97409	301	G
113068	reverse	112593	113027	40	A
129732	reverse	129498	129707	24	A
134327	reverse	133849	134301	25	C
142028	reverse	141481	141986	41	A
147054	reverse	145477	146970	83	A
148744	reverse	147054	148687	56	A
151354	reverse	149853	151223	130	A
159627	reverse	158517	159413	213	C
163972	reverse	162413	163922	49	A
185636	reverse	184817	185614	21	A
200583	reverse	198460	200499	83	A
203065	reverse	200535	202926	138	A
203419	reverse	202954	203319	99	G
226500	reverse	226263	226475	24	A
235794	reverse	234841	235770	23	A
270629	reverse	269376	270560	68	A
272587	reverse	272125	272559	27	A
274511	reverse	274012	274488	22	C
276047	reverse	274529	276019	27	A
277978	reverse	277003	277935	42	G
280871	reverse	280590	280853	17	T
288324	reverse	280973	288272	51	G
289271	reverse	288454	288972	298	A
291320	reverse	290802	291137	182	G
303906	reverse	302683	303804	101	T
305711	reverse	303810	305599	111	G
307755	reverse	305950	307666	88	A
309483	reverse	307985	309462	20	A
313034	reverse	312961	313034	-1	G
344046	reverse	342926	344032	13	T
347138	reverse	345887	346948	189	C
348625	reverse	347204	348580	44	T
360858	reverse	358448	360835	22	A
362522	reverse	361977	362480	41	G
363181	reverse	362585	363169	11	C
368654	reverse	367074	368608	45	A
384619	reverse	382631	384574	44	G
385261	reverse	384875	385207	53	A
386115	reverse	385330	386001	113	T
403377	reverse	399726	403315	61	G
412090	reverse	410218	412056	33	A
414220	reverse	412384	414192	27	A
419039	reverse	418555	418986	52	C
420928	reverse	419138	420871	56	T
421298	reverse	420999	421250	47	A
421879	reverse	421371	421850	28	C
425775	reverse	421999	425683	91	G
432205	reverse	426604	432154	50	T
444797	reverse	443597	444606	190	G
446529	reverse	444738	446505	23	C
451267	reverse	448962	451091	175	C
460988	reverse	458157	460965	22	A
462080	reverse	461077	462080	-1	A
464189	reverse	463169	464122	66	C
483008	reverse	479319	482987	20	A
499024	reverse	494807	498866	157	T
515989	reverse	514655	515878	110	G
517230	reverse	515998	517179	50	A
530498	reverse	529041	530474	23	C
535363	reverse	534444	535331	31	G
541770	reverse	540138	541727	42	A
551973	reverse	551016	551942	30	A
553547	reverse	552585	553523	23	A
557198	reverse	554958	557135	62	G
561218	reverse	560220	561194	23	C
562040	reverse	561256	562014	25	A
606882	reverse	605219	606856	25	C
610252	reverse	609732	610151	100	C
614963	reverse	613682	614872	90	T
615889	reverse	614888	615889	-1	A
619999	reverse	619177	619974	24	A
627548	reverse	626346	627524	23	G
630538	reverse	630110	630463	74	T
637867	reverse	634969	637740	126	G
639867	reverse	638309	639858	8	A
640308	reverse	640117	640278	29	T
640639	reverse	640410	640483	155	C
649192	reverse	647191	649044	147	A
651151	reverse	649124	651118	32	C
652010	reverse	651720	651935	74	C
653831	reverse	653240	653809	21	A
656700	reverse	654752	656534	165	A
658202	reverse	656629	658182	19	T
661666	reverse	659551	661473	192	A
662395	reverse	661752	662084	310	G
663386	reverse	662128	663359	26	A
665335	reverse	664318	665304	30	T
669418	reverse	665301	669348	69	T
673008	reverse	671923	672984	23	T
685810	reverse	685467	685781	28	A
686651	reverse	685881	686651	-1	A
717799	reverse	717012	717656	142	G
720190	reverse	719519	720166	23	A
720630	reverse	720266	720604	25	A
723159	reverse	722204	723004	154	A
724183	reverse	723065	724147	35	T
725699	reverse	724269	725676	22	A
731281	reverse	728625	731062	218	C
782086	reverse	780267	781999	86	C
784438	reverse	781999	784394	43	C
806546	reverse	805310	806518	27	T
812646	reverse	806856	812617	28	A
813471	reverse	812647	813135	335	C
822825	reverse	821625	822791	33	G
827143	reverse	826064	826930	212	T
830809	reverse	827138	830659	149	A
844550	reverse	843098	844483	66	A
851427	reverse	849992	851380	46	G
869715	reverse	868642	869571	143	G
895490	reverse	895080	895379	110	A
898035	reverse	897613	897912	122	A
905113	reverse	903291	905044	68	T
908280	reverse	905308	908266	13	G
923876	reverse	923260	923847	28	T
925503	reverse	923965	925350	152	A
935294	reverse	934960	935266	27	A
953087	reverse	952772	953062	24	A
981904	reverse	981171	981869	34	A
984671	reverse	982017	984525	145	T
999729	reverse	997819	999702	26	C
1000966	reverse	999811	1000937	28	G
1010744	reverse	1007379	1010699	44	T
1011803	reverse	1010865	1011554	248	G
1013732	reverse	1013172	1013699	32	C
1015439	reverse	1013779	1015277	161	G
1024031	reverse	1022458	1023978	52	A
1029357	reverse	1028696	1029337	19	G
1031144	reverse	1029384	1031123	20	A
1031804	reverse	1031314	1031769	34	A
1050314	reverse	1049398	1050291	22	A
1052864	reverse	1051492	1052838	25	T
1058060	reverse	1053645	1058031	28	C
1063602	reverse	1061238	1063568	33	A
1065104	reverse	1063737	1065077	26	T
1066165	reverse	1065554	1066102	62	G
1067646	reverse	1066311	1067594	51	T
1069069	reverse	1067632	1069069	-1	A
1077898	reverse	1076787	1077872	25	G
1079072	reverse	1078614	1079006	65	A
1079460	reverse	1079107	1079316	143	C
1080071	reverse	1079518	1080027	43	C
1082576	reverse	1082136	1082552	23	G
1086422	reverse	1085222	1086387	34	A
1087586	reverse	1086477	1087562	23	C
1088977	reverse	1088521	1088955	21	G
1089702	reverse	1089022	1089678	23	T
1095701	reverse	1094430	1095605	95	C
1096737	reverse	1095964	1096593	143	A
1106859	reverse	1106421	1106702	156	A
1115430	reverse	1113381	1115342	87	T
1117540	reverse	1115532	1117461	78	A
1124181	reverse	1122963	1124138	42	A
1135094	reverse	1132653	1135031	62	A
1138060	reverse	1137829	1138011	48	A
1138629	reverse	1138174	1138602	26	A
1151738	reverse	1148922	1151715	22	G
1153703	reverse	1152100	1153683	19	A
1171223	reverse	1167617	1171112	110	A
1177497	reverse	1176243	1177472	24	T
1178055	reverse	1177638	1178033	21	T
1180801	reverse	1178118	1180642	158	A
1193140	reverse	1192303	1193138	1	T
1194432	reverse	1193191	1194201	230	A
1202876	reverse	1200752	1202849	26	A
1204562	reverse	1203010	1204533	28	G
1207416	reverse	1206731	1207378	37	C
1215803	reverse	1214715	1215719	83	A
1219264	reverse	1218347	1219243	20	G
1221495	reverse	1221193	1221495	-1	A
1228882	reverse	1227836	1228813	68	A
1234481	reverse	1231581	1234433	47	C
1234956	reverse	1234554	1234922	33	A
1237071	reverse	1234934	1236846	224	A
1244787	reverse	1244524	1244649	137	T
1244826	reverse	1244743	1244826	-1	G
1275699	reverse	1273874	1275652	46	A
1281634	reverse	1280758	1281606	27	C
1284086	reverse	1283436	1284065	20	A
1303723	reverse	1302743	1303723	-1	A
1311127	reverse	1310460	1311098	28	A
1311707	reverse	1311410	1311523	183	G
1316887	reverse	1316504	1316812	74	T
1338277	reverse	1336808	1338163	113	A
1350637	reverse	1343444	1350596	40	A
1351415	reverse	1350839	1351339	75	A
1351978	reverse	1351402	1351956	21	T
1364431	reverse	1363643	1364329	101	A
1366444	reverse	1364442	1366277	166	C
1372575	reverse	1371277	1372497	77	A
1391607	reverse	1390844	1391485	121	A
1394128	reverse	1393758	1394099	28	C
1396946	reverse	1396095	1396898	47	A
1397796	reverse	1397019	1397660	135	G
1401869	reverse	1400900	1401805	63	G
1424002	reverse	1422613	1423851	150	A
1426514	reverse	1424253	1426481	32	T
1437599	reverse	1436911	1437549	49	A
1443138	reverse	1442690	1443088	49	C
1445777	reverse	1443231	1445735	41	G
1453376	reverse	1452241	1453275	100	T
1454346	reverse	1453305	1454288	57	A
1455336	reverse	1454959	1455252	83	A
1462892	reverse	1462062	1462847	44	A
1492917	reverse	1490467	1492891	25	A
1500944	reverse	1500527	1500850	93	G
1508187	reverse	1506934	1508004	182	A
1509566	reverse	1508087	1509490	75	G
1512939	reverse	1512199	1512849	89	A
1521829	reverse	1520134	1521744	84	T
1529415	reverse	1528469	1529356	58	C
1538306	reverse	1537346	1538266	39	A
1541614	reverse	1540030	1541568	45	G
1542640	reverse	1541847	1542602	37	C
1550644	reverse	1550092	1550622	21	T
1553376	reverse	1553171	1553347	28	C
1554399	reverse	1553474	1554397	1	T
1560358	reverse	1558980	1560308	49	A
1563424	reverse	1561612	1563391	32	C
1578320	reverse	1569445	1578269	50	A
1581017	reverse	1580299	1580949	67	A
1597011	reverse	1596211	1596990	20	A
1598329	reverse	1597097	1598179	149	A
1603275	reverse	1600241	1603228	46	T
1607882	reverse	1607376	1607852	29	A
1608311	reverse	1608062	1608283	27	A
1611065	reverse	1609324	1611041	23	A
1613981	reverse	1613566	1613952	28	C
1627785	reverse	1627576	1627755	29	A
1628594	reverse	1627864	1628502	91	A
1635390	reverse	1634535	1635233	156	A
1644470	reverse	1643445	1644245	224	G
1646347	reverse	1644279	1646315	31	T
1656176	reverse	1655333	1655929	246	C
1665475	reverse	1663729	1665444	30	A
1667362	reverse	1667115	1667345	16	C
1675111	reverse	1673280	1675049	61	G
1684740	reverse	1682727	1684710	29	A
1694000	reverse	1693512	1693850	149	A
1694265	reverse	1693902	1694213	51	A
1694745	reverse	1694342	1694713	31	A
1695480	reverse	1694715	1695275	204	T
1696023	reverse	1695293	1695997	25	T
1719315	reverse	1719001	1719267	47	A
1748046	reverse	1747602	1747928	117	A
1759755	reverse	1758954	1759704	50	A
1768365	reverse	1768003	1768341	23	A
1774331	reverse	1773860	1774207	123	A
1783571	reverse	1782763	1783554	16	A
1784461	reverse	1783583	1784431	29	A
1785346	reverse	1784576	1785274	71	A
1802409	reverse	1801165	1802331	77	A
1803562	reverse	1802423	1803532	29	T
1807241	reverse	1803546	1807127	113	A
1809695	reverse	1807129	1809620	74	A
1816815	reverse	1809617	1816675	139	G
1831297	reverse	1826612	1831264	32	G
1837049	reverse	1836543	1836998	50	G
1846973	reverse	1845111	1846907	65	A
1847884	reverse	1846904	1847854	29	G
1866196	reverse	1865762	1866175	20	A
1893707	reverse	1893347	1893556	150	A
1896192	reverse	1895247	1896167	24	C
1899089	reverse	1898307	1899053	35	C
1904368	reverse	1902163	1904259	108	G
1910781	reverse	1906068	1910608	172	A
1914609	reverse	1913806	1914441	167	T
1914829	reverse	1914545	1914799	29	A
1915658	reverse	1914796	1915611	46	A
1916486	reverse	1915673	1916464	21	A
1919505	reverse	1918863	1919495	9	C
1935531	reverse	1934977	1935500	30	T
1943919	reverse	1941725	1943893	25	A
1954867	reverse	1952350	1954808	58	A
1956759	reverse	1954790	1956553	205	T
1964062	reverse	1962803	1964041	20	A
1964890	reverse	1964106	1964870	19	C
1968346	reverse	1966871	1968262	83	G
1968860	reverse	1968479	1968796	63	A
1973492	reverse	1969975	1973492	-1	A
1978597	reverse	1978120	1978560	36	A
1980832	reverse	1978689	1980809	22	T
1986550	reverse	1985515	1986519	30	A
2006458	reverse	2005423	2006346	111	A
2009518	reverse	2006575	2009507	10	A
2011870	reverse	2009666	2011846	23	C
2044275	reverse	2044203	2044275	-1	T
2045615	reverse	2044344	2045540	74	G
2058987	reverse	2057398	2058964	22	T
2084637	reverse	2081960	2084597	39	G
2128774	reverse	2120707	2128660	113	A
2148059	reverse	2147704	2147934	124	G
2152260	reverse	2151239	2152240	19	A
2154979	reverse	2154740	2154952	26	A
2159191	reverse	2157662	2159092	98	G
2164407	reverse	2163047	2164378	28	A
2165573	reverse	2164495	2165545	27	A
2168744	reverse	2167408	2168673	70	G
2171470	reverse	2168842	2171253	216	A
2174172	reverse	2174092	2174165	6	A
2174577	reverse	2174319	2174540	36	G
2175287	reverse	2174672	2175268	18	C
2185537	reverse	2185022	2185408	128	G
2190983	reverse	2190408	2190845	137	A
2192387	reverse	2191504	2192322	64	A
2201480	reverse	2200343	2201454	25	A
2208500	reverse	2204383	2208469	30	G
2236725	reverse	2233274	2236447	277	A
2240318	reverse	2239721	2240299	18	G
2256638	reverse	2254915	2256570	67	G
2263493	reverse	2262349	2263443	49	G
2270074	reverse	2268777	2269871	202	T
2275163	reverse	2273468	2275078	84	A
2287390	reverse	2286036	2287367	22	A
2303857	reverse	2301354	2303510	346	A
2333588	reverse	2333398	2333565	22	T
2349811	reverse	2348301	2349773	37	G
2350805	reverse	2349912	2350715	89	A
2355181	reverse	2354166	2355101	79	G
2356892	reverse	2356352	2356858	33	C
2360182	reverse	2356910	2360094	87	G
2362540	reverse	2362150	2362468	71	A
2362974	reverse	2362888	2362974	-1	G
2368773	reverse	2367879	2368733	39	A
2371774	reverse	2370395	2371741	32	A
2373699	reverse	2372693	2373484	214	A
2385408	reverse	2384255	2385382	25	C
2386481	reverse	2385522	2386397	83	A
2387057	reverse	2386531	2386983	73	T
2388354	reverse	2387034	2388245	108	C
2392280	reverse	2389932	2392250	29	A
2394437	reverse	2393754	2394416	20	A
2395273	reverse	2394478	2395251	21	A
2396738	reverse	2395992	2396695	42	A
2397754	reverse	2396846	2397684	69	A
2403158	reverse	2402727	2403137	20	C
2406334	reverse	2403705	2406152	181	G
2413959	reverse	2413674	2413937	21	C
2417810	reverse	2417456	2417755	54	A
2420711	reverse	2419750	2420673	37	A
2421780	reverse	2420753	2421751	28	C
2426461	reverse	2426013	2426390	70	G
2431162	reverse	2429873	2431111	50	A
2436449	reverse	2435738	2436420	28	A
2440591	reverse	2439277	2440560	30	A
2444391	reverse	2443370	2444275	115	G
2451226	reverse	2450961	2451159	66	G
2454029	reverse	2452624	2453901	127	G
2457347	reverse	2456849	2457319	27	G
2457922	reverse	2457668	2457898	23	A
2459192	reverse	2458340	2459154	37	A
2461186	reverse	2460195	2461094	91	G
2465518	reverse	2465327	2465503	14	A
2465935	reverse	2465588	2465914	20	T
2475979	reverse	2475474	2475824	154	T
2502725	reverse	2492593	2502719	5	C
2503807	reverse	2502850	2503745	61	G
2515876	reverse	2514810	2515673	202	T
2515994	reverse	2515840	2515967	26	G
2519058	reverse	2517383	2519030	27	T
2534911	reverse	2534342	2534842	68	A
2538192	reverse	2537045	2538037	154	A
2552774	reverse	2551476	2552717	56	G
2565736	reverse	2565307	2565660	75	G
2566368	reverse	2565968	2566324	43	C
2568015	reverse	2566425	2567978	36	A
2573079	reverse	2571056	2573058	20	T
2594232	reverse	2584180	2594184	47	T
2598819	reverse	2594316	2598703	115	T
2599230	reverse	2598714	2599127	102	A
2604546	reverse	2602558	2604153	392	G
2606653	reverse	2604748	2606618	34	G
2609247	reverse	2606611	2609210	36	C
2611956	reverse	2610179	2611923	32	G
2614972	reverse	2612524	2614749	222	A
2616819	reverse	2616438	2616710	108	A
2619969	reverse	2619690	2619908	60	C
2622474	reverse	2620775	2622443	30	C
2630897	reverse	2629899	2630873	23	A
2632009	reverse	2630961	2631944	64	T
2633350	reverse	2631941	2633329	20	A
2634149	reverse	2633440	2634108	40	A
2636711	reverse	2634462	2636647	63	G
2646243	reverse	2645509	2646081	161	A
2647477	reverse	2646291	2647394	82	G
2653469	reverse	2652368	2653396	72	G
2660539	reverse	2659452	2660507	31	G
2666581	reverse	2665498	2666538	42	G
2671511	reverse	2670885	2671487	23	A
2676093	reverse	2674712	2676055	37	A
2701086	reverse	2699666	2701059	26	T
2708835	reverse	2708294	2708695	139	A
2721561	reverse	2718848	2721213	347	C
2725236	reverse	2725090	2725225	10	A
2797936	reverse	2794984	2797907	28	A
2806923	reverse	2805646	2806899	23	C
2819771	reverse	2818839	2819753	17	C
2821451	reverse	2821052	2821426	24	A
2823144	reverse	2821507	2823116	27	A
2878220	reverse	2876533	2878192	27	C
2884446	reverse	2882674	2884416	29	A
2893933	reverse	2893079	2893783	149	T
2895188	reverse	2893951	2894922	265	A
2903295	reverse	2902952	2903221	73	G
2926281	reverse	2925613	2926125	155	A
2931507	reverse	2927517	2931397	109	A
2935702	reverse	2931455	2935656	45	T
2941713	reverse	2940949	2941629	83	A
2942612	reverse	2941727	2942587	24	A
2953661	reverse	2950112	2953633	27	A
2988665	reverse	2986159	2988606	58	A
3001721	reverse	2997066	3001662	58	A
3002819	reverse	3001763	3002758	60	A
3010362	reverse	3010057	3010299	62	T
3016490	reverse	3014295	3016342	147	G
3029858	reverse	3017037	3029709	148	A
3063581	reverse	3055176	3063556	24	T
3081899	reverse	3080972	3081865	33	A
3129008	reverse	3128598	3128975	32	G
3139809	reverse	3135932	3139757	51	G
3145196	reverse	3144097	3145119	76	G
3159825	reverse	3154662	3159628	196	A
3176712	reverse	3175803	3176615	96	A
3184629	reverse	3181060	3184587	41	A
3187100	reverse	3184999	3187047	52	A
3188160	reverse	3187110	3188081	78	A
3228562	reverse	3227598	3228482	79	C
3231268	reverse	3230292	3231167	100	C
3233266	reverse	3232682	3233266	-1	A
3236410	reverse	3233419	3236380	29	T
3253187	reverse	3252774	3253139	47	A
3315733	reverse	3314904	3315701	31	A
3344637	reverse	3332168	3344595	41	G
3345371	reverse	3344797	3345273	97	A
3359501	reverse	3356866	3359460	40	A
3361786	reverse	3359632	3361740	45	T
3373386	reverse	3372115	3373338	47	A
3400317	reverse	3398891	3400120	196	G
3411355	reverse	3409721	3411303	51	A
3414448	reverse	3413625	3414421	26	C
3417531	reverse	3416155	3417510	20	A
3419131	reverse	3418259	3419098	32	A
3421557	reverse	3420889	3421521	35	A
3427258	reverse	3426271	3427200	57	G
3435358	reverse	3434505	3435308	49	A
3447214	reverse	3445941	3447122	91	T
3448719	reverse	3447272	3448661	57	G
3457248	reverse	3454285	3457216	31	A
3462502	reverse	3462254	3462325	176	G
3478839	reverse	3476491	3478818	20	T
3483351	reverse	3482981	3483328	22	C
3483679	reverse	3483420	3483653	25	T
3487633	reverse	3487340	3487606	26	A
3490123	reverse	3489415	3490123	-1	G
3491166	reverse	3490204	3491037	128	C
3503431	reverse	3497825	3503357	73	A
3506660	reverse	3505040	3506527	132	G
3561227	reverse	3555459	3561208	18	T
3561931	reverse	3561244	3561732	198	C
3577529	reverse	3575143	3577506	22	A
3579582	reverse	3578742	3579476	105	G
3596759	reverse	3583955	3596759	-1	A
3600586	reverse	3599215	3600471	114	G
3601430	reverse	3600755	3601180	249	T
3601739	reverse	3601464	3601703	35	A
3613506	reverse	3612564	3613391	114	G
3621889	reverse	3621000	3621863	25	C
3623771	reverse	3622472	3623677	93	A
3627031	reverse	3626428	3627012	18	A
3636059	reverse	3635217	3636030	28	C
3637648	reverse	3637485	3637640	7	G
3643203	reverse	3642173	3643165	37	A
3644296	reverse	3643224	3644249	46	A
3654577	reverse	3651137	3654513	63	A
3657584	reverse	3656223	3657578	5	G
3659895	reverse	3657602	3659857	37	A
3661258	reverse	3660468	3661208	49	A
3662539	reverse	3661273	3662483	55	A
3675594	reverse	3673549	3675414	179	G
3675594	reverse	3675521	3675594	-1	G
3675958	reverse	3675646	3675918	39	A
3678484	reverse	3676054	3678450	33	T
3679886	reverse	3678582	3679862	23	G
3680779	reverse	3679967	3680608	170	C
3682066	reverse	3680702	3682012	53	C
3687098	reverse	3687017	3687098	-1	G
3687229	reverse	3687156	3687228	0	G
3687381	reverse	3687283	3687356	24	T
3691661	reverse	3688547	3691609	51	C
3695136	reverse	3694468	3695091	44	C
3696670	reverse	3696181	3696648	21	C
3713556	reverse	3712447	3713499	56	A
3714400	reverse	3713608	3714198	201	T
3716424	reverse	3714270	3716398	25	A
3717094	reverse	3716586	3717074	19	T
3720719	reverse	3718261	3720636	82	A
3730354	reverse	3725032	3730194	159	A
3735912	reverse	3730426	3735857	54	A
3738087	reverse	3737426	3738043	43	G
3740471	reverse	3739450	3740424	46	C
3741253	reverse	3740556	3741053	199	A
3742623	reverse	3741216	3742540	82	G
3746315	reverse	3745760	3746266	48	G
3748434	reverse	3747673	3748395	38	A
3763262	reverse	3762552	3763238	23	A
3763741	reverse	3763348	3763689	51	C
3776645	reverse	3775762	3776592	52	C
3777626	reverse	3776690	3777526	99	G
3778956	reverse	3777824	3778937	18	A
3796581	reverse	3794450	3796552	28	A
3797447	reverse	3796555	3797424	22	A
3798508	reverse	3797585	3798445	62	G
3799720	reverse	3799503	3799694	25	A
3801671	reverse	3799743	3801652	18	G
3803966	reverse	3802844	3803935	30	C
3809891	reverse	3809384	3809845	45	A
3829670	reverse	3827167	3829596	73	A
3831434	reverse	3829632	3831188	245	A
3842887	reverse	3841020	3842844	42	G
3846469	reverse	3845527	3846420	48	A
3856279	reverse	3854107	3856250	28	A
3856698	reverse	3856334	3856612	85	G
3877235	reverse	3875737	3877214	20	A
3881072	reverse	3879747	3881066	5	A
3882833	reverse	3881119	3882786	46	G
3884783	reverse	3882913	3884751	31	A
3906017	reverse	3903275	3905972	44	A
3911161	reverse	3909651	3910964	196	G
3913496	reverse	3911275	3913328	167	A
3915153	reverse	3913657	3915093	59	T
3916410	reverse	3915162	3916391	18	A
3922877	reverse	3916434	3922765	111	G
3925225	reverse	3924515	3925123	101	A
3927720	reverse	3926831	3927697	22	T
3930636	reverse	3928846	3930598	37	A
3939022	reverse	3938762	3939001	20	A
3946388	reverse	3945179	3946336	51	A
3947246	reverse	3946425	3947057	188	A
3961501	reverse	3961006	3961473	27	G
3971187	reverse	3970442	3971038	148	A
3971507	reverse	3971117	3971443	63	T
3975230	reverse	3974940	3975182	47	G
3976246	reverse	3975847	3976224	21	T
3978703	reverse	3976270	3978654	48	A
3979735	reverse	3978747	3979616	118	C
3983996	reverse	3979782	3983955	40	A
3992490	reverse	3991629	3992408	81	A
3994839	reverse	3994374	3994754	84	A
4010156	reverse	4009092	4010087	68	G
4041320	reverse	4035079	4041144	175	A
4042757	reverse	4041267	4042636	120	C
4060394	reverse	4049210	4060258	135	A
4062026	reverse	4060397	4061686	339	A
4066716	reverse	4064032	4066685	30	G
4069077	reverse	4066758	4068942	134	T
4077099	reverse	4074936	4077048	50	A
4084996	reverse	4084370	4084975	20	T
4086254	reverse	4085339	4086058	195	G
4089241	reverse	4086509	4089217	23	A
4094362	reverse	4093734	4094345	16	C
4105553	reverse	4105311	4105544	8	A
4106498	reverse	4105600	4106472	25	A
4125333	reverse	4124250	4125304	28	G
4131171	reverse	4130109	4131147	23	C
4134917	reverse	4133700	4134890	26	C
4142286	reverse	4138746	4142251	34	A
4163029	reverse	4162085	4162978	50	A
4164579	reverse	4164079	4164555	23	G
4176968	reverse	4176124	4176918	49	G
4177532	reverse	4177014	4177472	59	G
4193016	reverse	4191791	4193007	8	A
4198036	reverse	4196019	4197970	65	A
4199168	reverse	4198236	4199140	27	G
4206969	reverse	4201706	4206553	415	G
4225687	reverse	4223178	4225636	50	G
4227755	reverse	4226666	4227598	156	A
4229287	reverse	4227853	4229267	19	A
4232568	reverse	4231645	4232484	83	A
4236002	reverse	4235425	4235979	22	A
4240509	reverse	4239848	4240408	100	G
4250926	reverse	4241995	4250878	47	A
4253086	reverse	4250942	4252792	293	T
4262850	reverse	4261914	4262828	21	C
4277296	reverse	4276883	4277278	17	C
4279057	reverse	4277525	4278964	92	T
4283954	reverse	4279323	4283848	105	A
4285444	reverse	4283935	4285179	264	T
4306104	reverse	4304556	4306051	52	A
4330385	reverse	4328782	4330281	103	A
4332930	reverse	4330448	4332765	164	G
4334516	reverse	4332925	4334456	59	A
4335020	reverse	4334485	4334892	127	T
4338115	reverse	4336875	4338090	24	A
4338814	reverse	4338173	4338790	23	T
4341081	reverse	4338856	4341039	41	A
4345115	reverse	4343539	4345081	33	C
4351264	reverse	4350851	4351099	164	A
4371340	reverse	4369305	4371325	14	A
4372043	reverse	4371405	4372007	35	G
4381821	reverse	4379275	4381730	90	A
4382933	reverse	4382230	4382901	31	G
4391263	reverse	4391031	4391240	22	A
4394022	reverse	4393260	4393970	51	C
4403507	reverse	4402698	4403159	347	A
4405718	reverse	4403159	4405534	183	G
4419642	reverse	4418774	4419622	19	A
4425436	reverse	4424601	4425290	145	C
4433292	reverse	4430999	4433261	30	T
4434675	reverse	4434110	4434649	25	G
4439394	reverse	4438536	4439375	18	T
4446325	reverse	4445150	4446298	26	T
4448653	reverse	4447842	4448621	31	G
4457927	reverse	4452098	4457878	48	C
4460801	reverse	4458125	4460759	41	G
4462389	reverse	4460872	4462344	44	T
4463351	reverse	4462626	4463325	25	A
4464891	reverse	4463447	4464871	19	T
4465345	reverse	4464957	4465328	16	T
4466960	reverse	4465407	4466873	86	G
4473680	reverse	4467231	4473548	131	A
4474462	reverse	4473553	4474314	147	G
4481688	reverse	4474369	4481644	43	A
4485686	reverse	4482657	4485652	33	G
4486289	reverse	4485905	4486267	21	G
4486671	reverse	4486334	4486651	19	A
4496331	reverse	4492050	4496291	39	T
4497357	reverse	4496390	4497304	52	G
4498589	reverse	4498020	4498493	95	G
4508686	reverse	4508197	4508661	24	A
4513563	reverse	4511775	4513542	20	A
4514645	reverse	4513641	4514522	122	G
4515893	reverse	4514728	4515879	13	T
4522237	reverse	4521112	4522213	23	A
4522996	reverse	4522329	4522961	34	T
4525815	reverse	4525203	4525763	51	A
4533820	reverse	4532540	4533717	102	A
4536794	reverse	4533871	4536784	9	T
4553064	reverse	4552978	4553064	-1	G
4553928	reverse	4553158	4553868	59	A
4556707	reverse	4553897	4556680	26	C
4559344	reverse	4557967	4559325	18	C
4566064	reverse	4563788	4565960	103	A
4571540	reverse	4566077	4571469	70	G
4580183	reverse	4579750	4580154	28	C
4585460	reverse	4584990	4585439	20	C
4585910	reverse	4585653	4585871	38	A
4587413	reverse	4586665	4587288	124	A
4587651	reverse	4587325	4587609	41	A
4591183	reverse	4591106	4591178	4	G
4594307	reverse	4593629	4594135	171	A
4598183	reverse	4594188	4598135	47	A
4601295	reverse	4600488	4601234	60	A
4603263	reverse	4601301	4603076	186	T
4608135	reverse	4607615	4608022	112	A
4611592	reverse	4610827	4611566	25	T
4612540	reverse	4612305	4612499	40	G
4616328	reverse	4615576	4616280	47	C
4623454	reverse	4622057	4623385	68	C
4624197	reverse	4623573	4624112	84	C
4626183	reverse	4625326	4626156	26	A
4628608	reverse	4626261	4628504	103	C
4630879	reverse	4628589	4630849	29	C
4644736	reverse	4644338	4644697	38	T
4655650	reverse	4654070	4655518	131	A
4659935	reverse	4659862	4659935	-1	G
4660123	reverse	4660050	4660123	-1	G
4660331	reverse	4660244	4660331	-1	G
4660618	reverse	4660393	4660578	39	G
4662039	reverse	4660763	4662001	37	T
4673714	reverse	4666044	4673681	32	A
4676026	reverse	4674192	4675978	47	A
4679556	reverse	4678646	4679425	130	A
4681956	reverse	4679966	4681921	34	A
4691123	reverse	4685179	4691094	28	A
4693279	reverse	4692241	4693185	93	G
4702349	reverse	4701912	4702325	23	C
4702857	reverse	4702446	4702829	27	G
4705837	reverse	4704698	4705771	65	A
4708994	reverse	4708174	4708956	37	A
4711641	reverse	4709031	4711502	138	G
4716227	reverse	4715309	4716176	50	T
4723820	reverse	4722774	4723724	95	T
4724510	reverse	4723858	4724457	52	T
4735303	reverse	4734300	4735259	43	G
4738547	reverse	4737344	4738517	29	T
4744059	reverse	4743296	4744009	49	G
4744807	reverse	4744115	4744756	50	T
4760986	reverse	4760148	4760960	25	A
4772657	reverse	4771279	4772588	68	A
4775926	reverse	4774608	4775901	24	G
4793509	reverse	4791877	4793292	216	G
4794521	reverse	4793615	4794494	26	C
4802872	reverse	4801152	4802672	199	A
4809589	reverse	4808815	4809567	21	A
4816899	reverse	4816128	4816874	24	T
4819611	reverse	4817629	4819602	8	A
4822449	reverse	4819772	4822431	17	T
4824181	reverse	4822581	4824005	175	T
4825522	reverse	4824045	4825447	74	A
4826706	reverse	4825456	4826653	52	A
4829356	reverse	4828647	4829337	18	G
4840018	reverse	4839255	4839950	67	G
4861609	reverse	4860837	4861445	163	A
4862609	reverse	4861608	4862516	92	A
4892484	reverse	4891261	4892399	84	A
4896243	reverse	4895932	4896225	17	G
4906655	reverse	4905964	4906629	25	A
4946387	reverse	4945726	4946322	64	T
4955473	reverse	4955401	4955473	-1	G
4955606	reverse	4955505	4955578	27	A
4977741	reverse	4976043	4977659	81	A
4994207	reverse	4984830	4993999	207	A
4998416	reverse	4996812	4998302	113	T
5007015	reverse	5006137	5006988	26	C
5009164	reverse	5007707	5009149	14	G
5017473	reverse	5017092	5017451	21	C
5017956	reverse	5017512	5017934	21	G
5018428	reverse	5018035	5018418	9	A
5024950	reverse	5022880	5024926	23	A
5029166	reverse	5028215	5029128	37	A
5040326	reverse	5038856	5040303	22	T
5041207	reverse	5040371	5041156	50	A
5042273	reverse	5041241	5042137	135	A
5044760	reverse	5043868	5044728	31	G
5051140	reverse	5050829	5051056	83	A
5053714	reverse	5052664	5053653	60	G
5075793	reverse	5074423	5075703	89	A
5076491	reverse	5075693	5076376	114	A
5078181	reverse	5077330	5078062	118	A
5081129	reverse	5079035	5081022	106	C
5082538	reverse	5081218	5082488	49	C
5088706	reverse	5087803	5088639	66	A
5089423	reverse	5088872	5089351	71	G
5095979	reverse	5094303	5095939	39	G
5097337	reverse	5096060	5097277	59	T
5100250	reverse	5097424	5100174	75	C
5101579	reverse	5100308	5101231	347	A
5104093	reverse	5101834	5104042	50	A
5105468	reverse	5104093	5105346	121	A
5119655	reverse	5105368	5119587	67	A
5121168	reverse	5120292	5121140	27	C
5125885	reverse	5124709	5125745	139	C
5128472	reverse	5125831	5128417	54	A
5129678	reverse	5128667	5129502	175	G
5135510	reverse	5134388	5135482	27	C
5136949	reverse	5135577	5136923	25	T
5137721	reverse	5136991	5137620	100	T
5141161	reverse	5138285	5141115	45	T
5143371	reverse	5142550	5143308	62	A
5149355	reverse	5147143	5149321	33	A
5150427	reverse	5149438	5150390	36	T
5152710	reverse	5150402	5152482	227	G
5165470	reverse	5164043	5165392	77	C
5168455	reverse	5166046	5168339	115	A
5174392	reverse	5168388	5174329	62	G
5177074	reverse	5175985	5177022	51	A
5191090	reverse	5182337	5190964	125	A
5191843	reverse	5191003	5191812	30	C
5192625	reverse	5191975	5192535	89	A
5193844	reverse	5192561	5193829	14	A
5199681	reverse	5198442	5199659	21	G
5210279	reverse	5209620	5210252	26	C
5213630	reverse	5210872	5213227	402	G
5219794	reverse	5217322	5219583	210	G
5225081	reverse	5223821	5224984	96	A
5227572	reverse	5225436	5227457	114	A
5229062	reverse	5227647	5229046	15	T
5231564	reverse	5229197	5231452	111	A
5232712	reverse	5232640	5232712	-1	G
5234085	reverse	5233511	5234050	34	A
5234292	reverse	5234143	5234253	38	A
5239153	reverse	5238920	5239129	23	G
5240076	reverse	5239235	5239924	151	G
5267926	reverse	5267621	5267854	71	A
5277226	reverse	5276845	5277171	54	T
5305695	reverse	5303917	5305668	26	T
5306819	reverse	5305679	5306710	108	T
5323983	reverse	5319600	5323549	433	G
5327860	reverse	5323630	5327621	238	A
5331712	reverse	5331379	5331690	21	A
5341187	reverse	5340930	5341148	38	A
5346379	reverse	5346001	5346345	33	A
5355372	reverse	5353510	5355289	82	A
5359516	reverse	5359396	5359468	47	G
5359555	reverse	5359482	5359555	-1	C
5359640	reverse	5359568	5359640	-1	T
5362521	reverse	5359875	5362439	81	A
5369957	reverse	5368835	5369929	27	T
5378432	reverse	5377450	5378394	37	T
5383230	reverse	5378480	5383208	21	C
5387134	reverse	5385469	5387063	70	A
5388396	reverse	5387134	5388354	41	T
5389216	reverse	5388497	5389089	126	C
5393748	reverse	5393100	5393717	30	C
5394259	reverse	5393802	5394107	151	G
5395613	reverse	5395026	5395367	245	A
5398017	reverse	5395520	5397973	43	G
5398459	reverse	5398072	5398398	60	A
5401613	reverse	5401030	5401584	28	C
5411263	reverse	5409885	5411222	40	G
5413748	reverse	5413169	5413657	90	T
5421073	reverse	5419376	5421040	32	A
5427895	reverse	5422102	5427869	25	G
5435948	reverse	5434538	5435933	14	T
5438387	reverse	5435993	5438311	75	G
5439191	reverse	5438649	5439155	35	G
5441992	reverse	5441709	5441963	28	G
5446028	reverse	5445230	5446006	21	G
5450330	reverse	5448564	5450110	219	A
5464955	reverse	5457101	5464854	100	A
5472328	reverse	5470313	5472303	24	G
5479608	reverse	5478992	5479579	28	A
5483006	reverse	5482666	5482956	49	C
5483545	reverse	5483039	5483524	20	T
5484650	reverse	5483587	5484619	30	C
5502031	reverse	5501402	5501923	107	T
5514537	reverse	5514196	5514501	35	A
5518088	reverse	5517418	5518065	22	A
5519480	reverse	5518127	5519365	114	A
5520906	reverse	5519564	5520714	191	C
5535939	reverse	5532276	5535889	49	A
5536251	reverse	5536028	5536159	91	T
5539487	reverse	5539415	5539487	-1	G
5539620	reverse	5539519	5539592	27	A
5541223	reverse	5539658	5541183	39	T
5543382	reverse	5541735	5543356	25	C
5544306	reverse	5543417	5544232	73	G
5545445	reverse	5544387	5545403	41	A
5547921	reverse	5545446	5547664	256	T
5549983	reverse	5548775	5549883	99	A
5561015	reverse	5556302	5560968	46	G
5567021	reverse	5565696	5566931	89	A
5595084	reverse	5594439	5595030	53	G
5597442	reverse	5595303	5597408	33	T
5597958	reverse	5597582	5597851	106	A
5603407	reverse	5599356	5603387	19	A
5604054	reverse	5603432	5603890	163	C
5604093	reverse	5604020	5604093	-1	C
5604269	reverse	5604187	5604269	-1	G
5605452	reverse	5604283	5605430	21	A
5609749	reverse	5605496	5609630	118	A
5610536	reverse	5609829	5610452	83	C
5611933	reverse	5610902	5611796	136	A
5615039	reverse	5611793	5615014	24	T
5616853	reverse	5615034	5616832	20	C
5617877	reverse	5617015	5617821	55	A
5619028	reverse	5617878	5619011	16	A
5621098	reverse	5619127	5621040	57	A
5621750	reverse	5621130	5621690	59	A
5624076	reverse	5623604	5624008	67	G
5625621	reverse	5624704	5625436	184	T
5627049	reverse	5626213	5626986	62	C
5641030	reverse	5640094	5640987	42	C
5642336	reverse	5641111	5642292	43	G
5642633	reverse	5642400	5642624	8	A
5648352	reverse	5647324	5648325	26	G
5657223	reverse	5655060	5657099	123	T
5658526	reverse	5658407	5658498	27	T
5659296	reverse	5658630	5659247	48	A
5662220	reverse	5659342	5662194	25	A
5667574	reverse	5663163	5667499	74	A
5672491	reverse	5668330	5672348	142	A
5689025	reverse	5686053	5688764	260	A
5694561	reverse	5693711	5694508	52	G
5704127	reverse	5702032	5703942	184	A
5706546	reverse	5704193	5706378	167	T
5738975	reverse	5738681	5738947	27	T
5741445	reverse	5740541	5741404	40	G
5743487	reverse	5743033	5743449	37	A
5745054	reverse	5744620	5745027	26	G
5748116	reverse	5745988	5748057	58	C
5768716	reverse	5767227	5768696	19	T
5777217	reverse	5776477	5777190	26	G
5778049	reverse	5777254	5778015	33	A
5784717	reverse	5783356	5784480	236	A
5793517	reverse	5793033	5793479	37	T
5796192	reverse	5794355	5796088	103	A
5802422	reverse	5800034	5802277	144	G
5807143	reverse	5804393	5806932	210	G
5809222	reverse	5807061	5809114	107	C
5812958	reverse	5809333	5812799	158	G
5814778	reverse	5813463	5814755	22	C
5816034	reverse	5814807	5815991	42	A
5820499	reverse	5816026	5820035	463	A
5821131	reverse	5820141	5821112	18	T
5824589	reverse	5821170	5824498	90	A
5828235	reverse	5827671	5828213	21	A
5831332	reverse	5829348	5831262	69	A
5849337	reverse	5842609	5849307	29	T
5849977	reverse	5849319	5849939	37	C
5850927	reverse	5850072	5850890	36	A
5852143	reverse	5851044	5852110	32	G
5855265	reverse	5853158	5855041	223	G
5864865	reverse	5862849	5864821	43	G
5885117	reverse	5883665	5885089	27	C
5889987	reverse	5888931	5889815	171	A
5891070	reverse	5889976	5890932	137	T
5896259	reverse	5891005	5896194	64	T
5904289	reverse	5896298	5904267	21	A
5907512	reverse	5904323	5907271	240	A
5930611	reverse	5929818	5930585	25	T
5937540	reverse	5936392	5937459	80	C
5943627	reverse	5937636	5943543	83	C
5946556	reverse	5943768	5946536	19	C
5952152	reverse	5946586	5952103	48	A
5956162	reverse	5954855	5956123	38	C
5957974	reverse	5956226	5957665	308	A
5958770	reverse	5958489	5958704	65	C
5973121	reverse	5972142	5973071	49	G
5973559	reverse	5973082	5973498	60	A
5973939	reverse	5973642	5973917	21	A
5985567	reverse	5982861	5985416	150	G
5990269	reverse	5985654	5989809	459	T
5991740	reverse	5990266	5991671	68	A
5994928	reverse	5992334	5994901	26	C
6004191	reverse	5995985	6004104	86	A
6010784	reverse	6004374	6010572	211	T
6012115	reverse	6010690	6012093	21	A
6013744	reverse	6012156	6013685	58	A
6017122	reverse	6015332	6017011	110	G
6021636	reverse	6020270	6021609	26	A
6024097	reverse	6023214	6024037	59	G
6025753	reverse	6024110	6025727	25	G
6026422	reverse	6025867	6026397	24	C
6028572	reverse	6026551	6028491	80	G
6033671	reverse	6028600	6033596	74	G
6037034	reverse	6034912	6036729	304	A
6048290	reverse	6047783	6048250	39	A
6049284	reverse	6048769	6049260	23	A
6058978	reverse	6058115	6058870	107	C
6063883	reverse	6060781	6063843	39	C
6071636	reverse	6070863	6071600	35	G
6103027	reverse	6102527	6102964	62	G
6109055	reverse	6108684	6108899	155	A
6116061	reverse	6115411	6116013	47	A
6118294	reverse	6116678	6118219	74	A
6119329	reverse	6118335	6119228	100	C
6120681	reverse	6120182	6120577	103	G
6125628	reverse	6124863	6125606	21	C
6131802	reverse	6130369	6131667	134	G
6133853	reverse	6132678	6133832	20	T
6135946	reverse	6135247	6135924	21	A
6144006	reverse	6143444	6143833	172	G
6145020	reverse	6143880	6144962	57	G
6147826	reverse	6146800	6147798	27	C
6148955	reverse	6147866	6148780	174	G
6155249	reverse	6150967	6155226	22	C
6155841	reverse	6155236	6155790	50	C
6163253	reverse	6158167	6163115	137	T
6163762	reverse	6163322	6163741	20	A
6168962	reverse	6166506	6168940	21	C
6172486	reverse	6171078	6172337	148	C
6172949	reverse	6172582	6172908	40	A
6176848	reverse	6174599	6176809	38	A
6177885	reverse	6176827	6177840	44	T
6180566	reverse	6180061	6180543	22	G
6182537	reverse	6180610	6182511	25	T
6188339	reverse	6187256	6188314	24	A
6189737	reverse	6189131	6189613	123	C
6192949	reverse	6190564	6192929	19	C
6194671	reverse	6192956	6194649	21	A
6206656	reverse	6206092	6206610	45	G
6207915	reverse	6206903	6207883	31	A
6214343	reverse	6213947	6214282	60	A
6223642	reverse	6223248	6223565	76	A
6224100	reverse	6223643	6224068	31	G
6226082	reverse	6224329	6226035	46	G
6232624	reverse	6231622	6232539	84	A
6235782	reverse	6234066	6235742	39	G
6242487	reverse	6240535	6242394	92	A
6243134	reverse	6242604	6243014	119	T
6243854	reverse	6243236	6243784	69	A
6246782	reverse	6245099	6246725	56	A
6247847	reverse	6247082	6247630	216	G
6256895	reverse	6255344	6256837	57	A
6259499	reverse	6258966	6259369	129	C
6268795	reverse	6267659	6268729	65	C
6275001	reverse	6273680	6274959	41	G
6276299	reverse	6275878	6276249	49	A
6277046	reverse	6276296	6277015	30	A
6284853	reverse	6283177	6284828	24	C
6290447	reverse	6289541	6290341	105	G
6291783	reverse	6290543	6291697	85	G
6292016	reverse	6291749	6291916	99	T
6292299	reverse	6292100	6292267	31	G
6296662	reverse	6292401	6296621	40	G
6299582	reverse	6299138	6299576	5	G
6304202	reverse	6303269	6304168	33	T
6305206	reverse	6304285	6305187	18	A
6306208	reverse	6305306	6306034	173	G
6307137	reverse	6306130	6306963	173	A
6315958	reverse	6315886	6315958	-1	G
6316091	reverse	6315990	6316063	27	A
6322032	reverse	6320283	6321968	63	A
6324280	reverse	6322104	6324230	49	A
6329519	reverse	6326330	6329331	187	G
6333014	reverse	6332741	6332989	24	A
6346293	reverse	6344830	6346287	5	A
6358070	reverse	6357284	6358025	44	A
6363649	reverse	6361121	6363562	86	A
6366091	reverse	6364967	6366007	83	A
6366753	reverse	6366091	6366732	20	T
6378010	reverse	6377722	6377967	42	G
6379798	reverse	6378082	6379686	111	C
6385212	reverse	6383971	6385185	26	G
6391241	reverse	6389416	6391239	1	A
6392758	reverse	6391255	6392670	87	G
6395003	reverse	6393773	6394976	26	G
6403865	reverse	6400979	6403831	33	A
6418009	reverse	6408888	6417911	97	G
6428139	reverse	6427701	6428120	18	C
6434823	reverse	6433984	6434784	38	C
6438935	reverse	6438334	6438894	40	A
6445895	reverse	6445141	6445791	103	A
6450219	reverse	6449427	6450206	12	T
6454569	reverse	6450947	6454488	80	A
6455291	reverse	6454656	6455261	29	T
6455702	reverse	6455307	6455600	101	G
6459500	reverse	6456695	6459436	63	C
6462205	reverse	6461404	6462093	111	T
6464360	reverse	6462110	6464314	45	G
6485229	reverse	6482718	6485007	221	A
6487744	reverse	6486815	6487573	170	T
6492360	reverse	6492091	6492303	56	A
6492952	reverse	6492521	6492922	29	A
6494004	reverse	6493118	6493975	28	G
6499209	reverse	6498135	6499163	45	A
6500246	reverse	6499256	6500224	21	C
6511519	reverse	6509076	6511495	23	T
6512604	reverse	6511570	6512529	74	A
6513986	reverse	6512693	6513877	108	G
6518265	reverse	6516367	6518202	62	A
6520997	reverse	6519059	6520946	50	A
6526968	reverse	6521067	6526748	219	A
6527698	reverse	6526798	6527667	30	T
6528147	reverse	6527684	6528064	82	G
6532476	reverse	6528228	6532453	22	T
6535101	reverse	6533634	6535001	99	A
6536968	reverse	6535072	6536808	159	C
NA	reverse	16336	16608
NA	reverse	24589	25566
NA	reverse	30523	34532
NA	reverse	35926	36922
NA	reverse	55575	56984
NA	reverse	60765	61148
NA	reverse	67187	68280
NA	reverse	68346	69266
NA	reverse	71923	72360
NA	reverse	75076	76276
NA	reverse	81025	92474
NA	reverse	110675	112514
NA	reverse	140273	141181
NA	reverse	142162	142785
NA	reverse	143881	145308
NA	reverse	164072	164590
NA	reverse	191825	192532
NA	reverse	192659	195608
NA	reverse	195871	198390
NA	reverse	203517	204689
NA	reverse	204880	205815
NA	reverse	206784	208394
NA	reverse	208482	210934
NA	reverse	212285	213643
NA	reverse	214640	215557
NA	reverse	236099	237019
NA	reverse	243064	243945
NA	reverse	244005	244787
NA	reverse	254764	256110
NA	reverse	260374	261639
NA	reverse	261705	263030
NA	reverse	266282	267579
NA	reverse	267696	269201
NA	reverse	271601	272047
NA	reverse	272724	273365
NA	reverse	273633	273920
NA	reverse	276153	276839
NA	reverse	279718	280557
NA	reverse	311665	312499
NA	reverse	313222	313638
NA	reverse	318332	319753
NA	reverse	321051	321983
NA	reverse	322033	323247
NA	reverse	323410	324180
NA	reverse	324289	324975
NA	reverse	325606	326364
NA	reverse	326536	327288
NA	reverse	328093	331944
NA	reverse	332121	332303
NA	reverse	332467	334749
NA	reverse	344118	344996
NA	reverse	345159	345824
NA	reverse	364234	364986
NA	reverse	365755	366309
NA	reverse	369396	370625
NA	reverse	374583	377027
NA	reverse	377448	381299
NA	reverse	390120	392064
NA	reverse	396209	396964
NA	reverse	403906	405057
NA	reverse	407991	408464
NA	reverse	408603	409988
NA	reverse	436948	437679
NA	reverse	441599	441856
NA	reverse	441918	442241
NA	reverse	442322	443476
NA	reverse	446594	448561
NA	reverse	448669	448839
NA	reverse	453674	454573
NA	reverse	462129	463088
NA	reverse	486057	486500
NA	reverse	492637	494556
NA	reverse	504138	506649
NA	reverse	506831	509472
NA	reverse	509567	511006
NA	reverse	511113	511229
NA	reverse	518907	520529
NA	reverse	523867	526068
NA	reverse	526330	527706
NA	reverse	542843	546826
NA	reverse	548941	550668
NA	reverse	559121	560017
NA	reverse	562082	562402
NA	reverse	562444	563169
NA	reverse	563308	563601
NA	reverse	563655	564581
NA	reverse	581088	590077
NA	reverse	595676	596637
NA	reverse	596990	597868
NA	reverse	600869	601375
NA	reverse	606944	607453
NA	reverse	611373	612116
NA	reverse	624927	625583
NA	reverse	629307	629981
NA	reverse	630641	631552
NA	reverse	631998	632513
NA	reverse	632869	634778
NA	reverse	640581	642266
NA	reverse	643347	647084
NA	reverse	651201	651650
NA	reverse	658179	659450
NA	reverse	663396	664202
NA	reverse	775225	778062
NA	reverse	814846	820974
NA	reverse	822871	823725
NA	reverse	833833	835038
NA	reverse	835206	837600
NA	reverse	837665	838993
NA	reverse	839129	840448
NA	reverse	840542	841270
NA	reverse	846470	847765
NA	reverse	848003	848746
NA	reverse	848846	849247
NA	reverse	851913	852836
NA	reverse	853407	854793
NA	reverse	854929	855861
NA	reverse	856435	858843
NA	reverse	860054	860512
NA	reverse	862150	862476
NA	reverse	862538	864247
NA	reverse	864434	866321
NA	reverse	867362	868546
NA	reverse	870437	873423
NA	reverse	874353	875141
NA	reverse	880045	886145
NA	reverse	889157	890047
NA	reverse	890143	894983
NA	reverse	895688	897481
NA	reverse	898045	898562
NA	reverse	899938	901194
NA	reverse	910888	913832
NA	reverse	913925	915251
NA	reverse	915383	918289
NA	reverse	920399	920968
NA	reverse	921046	923232
NA	reverse	932168	932566
NA	reverse	932631	933824
NA	reverse	935422	936666
NA	reverse	936949	937824
NA	reverse	938752	940431
NA	reverse	940586	941890
NA	reverse	941975	945029
NA	reverse	945100	945633
NA	reverse	947387	949493
NA	reverse	950502	952606
NA	reverse	953365	956341
NA	reverse	967444	968133
NA	reverse	968223	971198
NA	reverse	971409	971986
NA	reverse	972926	973594
NA	reverse	984614	985204
NA	reverse	985718	986587
NA	reverse	986659	987788
NA	reverse	1002496	1006974
NA	reverse	1011901	1012170
NA	reverse	1016947	1017840
NA	reverse	1017890	1022248
NA	reverse	1033659	1035688
NA	reverse	1036617	1037840
NA	reverse	1053401	1053553
NA	reverse	1059517	1061052
NA	reverse	1080409	1082047
NA	reverse	1089762	1090856
NA	reverse	1091014	1091595
NA	reverse	1120835	1121623
NA	reverse	1154465	1158373
NA	reverse	1158474	1159355
NA	reverse	1160401	1161378
NA	reverse	1161473	1162426
NA	reverse	1172887	1174062
NA	reverse	1174167	1174823
NA	reverse	1174918	1176155
NA	reverse	1194757	1195316
NA	reverse	1198334	1198694
NA	reverse	1200057	1200689
NA	reverse	1215812	1217167
NA	reverse	1217241	1217711
NA	reverse	1220135	1221262
NA	reverse	1222474	1222824
NA	reverse	1223012	1224022
NA	reverse	1224114	1225946
NA	reverse	1226065	1227752
NA	reverse	1241505	1242002
NA	reverse	1251175	1251990
NA	reverse	1271832	1272782
NA	reverse	1280276	1280671
NA	reverse	1285136	1285843
NA	reverse	1285902	1287673
NA	reverse	1287746	1288786
NA	reverse	1288938	1291259
NA	reverse	1291296	1292204
NA	reverse	1293079	1296317
NA	reverse	1296452	1297429
NA	reverse	1303857	1304084
NA	reverse	1306031	1306970
NA	reverse	1307101	1310388
NA	reverse	1330245	1331201
NA	reverse	1355439	1356752
NA	reverse	1357056	1359161
NA	reverse	1373065	1374294
NA	reverse	1397984	1399846
NA	reverse	1427074	1427418
NA	reverse	1441873	1442553
NA	reverse	1450522	1452146
NA	reverse	1455574	1455933
NA	reverse	1457967	1461895
NA	reverse	1500917	1503484
NA	reverse	1503610	1504617
NA	reverse	1513025	1516930
NA	reverse	1517909	1518835
NA	reverse	1522431	1523216
NA	reverse	1526841	1528250
NA	reverse	1539568	1539897
NA	reverse	1542808	1545204
NA	reverse	1549571	1549993
NA	reverse	1550981	1551619
NA	reverse	1578657	1580102
NA	reverse	1581022	1583774
NA	reverse	1584016	1595308
NA	reverse	1598184	1599101
NA	reverse	1628499	1634357
NA	reverse	1635662	1641403
NA	reverse	1641698	1643358
NA	reverse	1658203	1660546
NA	reverse	1660714	1662081
NA	reverse	1667396	1670152
NA	reverse	1670289	1673239
NA	reverse	1675921	1676673
NA	reverse	1676774	1678738
NA	reverse	1696108	1696665
NA	reverse	1697536	1698429
NA	reverse	1703714	1705499
NA	reverse	1705590	1706333
NA	reverse	1712442	1713254
NA	reverse	1717889	1718965
NA	reverse	1729996	1730283
NA	reverse	1734730	1735656
NA	reverse	1736789	1744455
NA	reverse	1744684	1745097
NA	reverse	1745467	1746985
NA	reverse	1747083	1747448
NA	reverse	1759897	1760415
NA	reverse	1776770	1779051
NA	reverse	1797521	1799707
NA	reverse	1818107	1821654
NA	reverse	1822786	1823700
NA	reverse	1832307	1834664
NA	reverse	1837281	1840133
NA	reverse	1856273	1857703
NA	reverse	1866762	1867277
NA	reverse	1878462	1878749
NA	reverse	1883722	1887201
NA	reverse	1893771	1895160
NA	reverse	1900319	1902124
NA	reverse	1905418	1905996
NA	reverse	1912348	1913637
NA	reverse	1922000	1922695
NA	reverse	1923032	1924132
NA	reverse	1926578	1927303
NA	reverse	1927460	1928419
NA	reverse	1929042	1932050
NA	reverse	1933020	1933820
NA	reverse	1934355	1934861
NA	reverse	1935570	1936104
NA	reverse	1936671	1936868
NA	reverse	1937290	1938800
NA	reverse	1939714	1941585
NA	reverse	1944036	1944257
NA	reverse	1951802	1952068
NA	reverse	1958113	1961041
NA	reverse	1961117	1961671
NA	reverse	1973559	1975013
NA	reverse	1976148	1976624
NA	reverse	1976668	1978005
NA	reverse	1999115	1999972
NA	reverse	2003101	2003538
NA	reverse	2011997	2013331
NA	reverse	2047744	2050360
NA	reverse	2059615	2060943
NA	reverse	2062516	2063409
NA	reverse	2093120	2095272
NA	reverse	2100240	2101205
NA	reverse	2115489	2117452
NA	reverse	2149167	2151071
NA	reverse	2152312	2153292
NA	reverse	2177117	2178148
NA	reverse	2185465	2187393
NA	reverse	2220550	2222351
NA	reverse	2225617	2226150
NA	reverse	2250687	2251820
NA	reverse	2260023	2260970
NA	reverse	2261099	2262276
NA	reverse	2277092	2277400
NA	reverse	2277496	2278077
NA	reverse	2278687	2282021
NA	reverse	2282748	2283674
NA	reverse	2287689	2291946
NA	reverse	2294770	2295854
NA	reverse	2298532	2301301
NA	reverse	2304770	2307835
NA	reverse	2320164	2321990
NA	reverse	2322153	2322977
NA	reverse	2323029	2325014
NA	reverse	2325060	2327035
NA	reverse	2327152	2329648
NA	reverse	2329721	2331523
NA	reverse	2332401	2333165
NA	reverse	2336025	2336540
NA	reverse	2337500	2338141
NA	reverse	2345654	2347729
NA	reverse	2347816	2348175
NA	reverse	2353093	2353959
NA	reverse	2355297	2355845
NA	reverse	2364957	2365385
NA	reverse	2365530	2365985
NA	reverse	2366071	2367090
NA	reverse	2375865	2376635
NA	reverse	2376726	2381838
NA	reverse	2381976	2382941
NA	reverse	2397913	2400737
NA	reverse	2401079	2401672
NA	reverse	2401738	2402463
NA	reverse	2403196	2403576
NA	reverse	2409545	2411553
NA	reverse	2414011	2415332
NA	reverse	2416187	2416591
NA	reverse	2426933	2428012
NA	reverse	2431178	2431645
NA	reverse	2431760	2432544
NA	reverse	2432715	2434523
NA	reverse	2434601	2435260
NA	reverse	2442781	2442951
NA	reverse	2446265	2447721
NA	reverse	2449679	2450374
NA	reverse	2452096	2452512
NA	reverse	2454791	2455678
NA	reverse	2461821	2463071
NA	reverse	2474825	2475199
NA	reverse	2503775	2504678
NA	reverse	2507551	2508237
NA	reverse	2508337	2508825
NA	reverse	2511265	2513929
NA	reverse	2516093	2517184
NA	reverse	2524349	2525068
NA	reverse	2525215	2530001
NA	reverse	2535012	2535536
NA	reverse	2538496	2543870
NA	reverse	2552900	2554826
NA	reverse	2576304	2578448
NA	reverse	2583256	2584065
NA	reverse	2599727	2600281
NA	reverse	2600360	2602378
NA	reverse	2609286	2610176
NA	reverse	2611967	2612437
NA	reverse	2620013	2620720
NA	reverse	2668775	2669787
NA	reverse	2678435	2682782
NA	reverse	2683111	2686286
NA	reverse	2686568	2690485
NA	reverse	2691005	2692000
NA	reverse	2692127	2699525
NA	reverse	2701170	2703530
NA	reverse	2703604	2705649
NA	reverse	2705903	2707950
NA	reverse	2709577	2710638
NA	reverse	2710945	2712999
NA	reverse	2713081	2713905
NA	reverse	2714625	2714903
NA	reverse	2714969	2715496
NA	reverse	2715633	2716943
NA	reverse	2717346	2717738
NA	reverse	2718015	2718521
NA	reverse	2723429	2724928
NA	reverse	2728313	2729800
NA	reverse	2730777	2732504
NA	reverse	2733014	2733244
NA	reverse	2734145	2734291
NA	reverse	2734428	2735120
NA	reverse	2743301	2744233
NA	reverse	2745827	2748414
NA	reverse	2748474	2749379
NA	reverse	2750021	2750833
NA	reverse	2763407	2764402
NA	reverse	2767719	2768843
NA	reverse	2769040	2771798
NA	reverse	2781439	2783528
NA	reverse	2799234	2800106
NA	reverse	2802846	2803064
NA	reverse	2808672	2811000
NA	reverse	2812739	2818608
NA	reverse	2823512	2824001
NA	reverse	2827632	2829631
NA	reverse	2834555	2837511
NA	reverse	2837589	2839361
NA	reverse	2870581	2874218
NA	reverse	2874987	2876003
NA	reverse	2903336	2904250
NA	reverse	2908062	2908307
NA	reverse	2910054	2910617
NA	reverse	2937476	2937790
NA	reverse	2938495	2940867
NA	reverse	2943630	2945267
NA	reverse	2953666	2956296
NA	reverse	2988709	2990358
NA	reverse	2991632	2995167
NA	reverse	3044774	3045901
NA	reverse	3046079	3052517
NA	reverse	3054202	3055134
NA	reverse	3063779	3064684
NA	reverse	3070920	3073445
NA	reverse	3073663	3075288
NA	reverse	3075453	3076974
NA	reverse	3077071	3077592
NA	reverse	3079172	3080868
NA	reverse	3084472	3085272
NA	reverse	3085289	3086083
NA	reverse	3116940	3122326
NA	reverse	3123481	3126334
NA	reverse	3126413	3127303
NA	reverse	3129531	3131228
NA	reverse	3131350	3132463
NA	reverse	3133779	3134849
NA	reverse	3139925	3144025
NA	reverse	3146722	3150795
NA	reverse	3151011	3151997
NA	reverse	3152097	3153542
NA	reverse	3160432	3163555
NA	reverse	3163743	3164810
NA	reverse	3164893	3174547
NA	reverse	3176984	3177358
NA	reverse	3196396	3198149
NA	reverse	3198432	3200078
NA	reverse	3200165	3203704
NA	reverse	3205778	3206281
NA	reverse	3206340	3209256
NA	reverse	3209914	3211497
NA	reverse	3211626	3215177
NA	reverse	3215363	3216613
NA	reverse	3216786	3220073
NA	reverse	3228608	3230203
NA	reverse	3231173	3232551
NA	reverse	3237985	3238539
NA	reverse	3238696	3240360
NA	reverse	3242840	3243160
NA	reverse	3243835	3245934
NA	reverse	3247591	3249795
NA	reverse	3249997	3250449
NA	reverse	3250575	3252445
NA	reverse	3269786	3277288
NA	reverse	3277432	3281688
NA	reverse	3282592	3285030
NA	reverse	3285083	3285370
NA	reverse	3285822	3290863
NA	reverse	3291942	3293907
NA	reverse	3294000	3300902
NA	reverse	3304080	3309397
NA	reverse	3312668	3313744
NA	reverse	3315808	3316761
NA	reverse	3322528	3324300
NA	reverse	3325268	3328426
NA	reverse	3330603	3332065
NA	reverse	3353004	3353906
NA	reverse	3373541	3374722
NA	reverse	3374868	3382925
NA	reverse	3383604	3384506
NA	reverse	3386039	3386926
NA	reverse	3388251	3389707
NA	reverse	3392089	3392496
NA	reverse	3397868	3398770
NA	reverse	3400608	3401978
NA	reverse	3402135	3403511
NA	reverse	3405199	3406659
NA	reverse	3406799	3407320
NA	reverse	3411438	3412862
NA	reverse	3419146	3420507
NA	reverse	3444304	3445728
NA	reverse	3457302	3462201
NA	reverse	3462683	3464203
NA	reverse	3464290	3464727
NA	reverse	3467639	3469164
NA	reverse	3471184	3476224
NA	reverse	3478895	3480598
NA	reverse	3484359	3484730
NA	reverse	3485025	3485360
NA	reverse	3487713	3488321
NA	reverse	3503576	3504904
NA	reverse	3516130	3516510
NA	reverse	3517005	3522169
NA	reverse	3523452	3525752
NA	reverse	3525885	3527735
NA	reverse	3528236	3534841
NA	reverse	3535826	3535948
NA	reverse	3562214	3562927
NA	reverse	3571865	3572848
NA	reverse	3577575	3578108
NA	reverse	3601871	3604715
NA	reverse	3604857	3605066
NA	reverse	3605156	3609101
NA	reverse	3615195	3616649
NA	reverse	3627135	3629423
NA	reverse	3640075	3640656
NA	reverse	3647850	3648611
NA	reverse	3649645	3650289
NA	reverse	3686462	3686683
NA	reverse	3717181	3718191
NA	reverse	3743992	3744477
NA	reverse	3749019	3751011
NA	reverse	3752461	3755824
NA	reverse	3756395	3757282
NA	reverse	3758224	3758955
NA	reverse	3759037	3762202
NA	reverse	3768667	3775728
NA	reverse	3779064	3787576
NA	reverse	3801649	3802800
NA	reverse	3805908	3806822
NA	reverse	3810500	3826622
NA	reverse	3843452	3844087
NA	reverse	3846579	3847340
NA	reverse	3850461	3852419
NA	reverse	3853035	3853643
NA	reverse	3857768	3859392
NA	reverse	3859513	3860205
NA	reverse	3860306	3862963
NA	reverse	3863071	3867554
NA	reverse	3867742	3869817
NA	reverse	3874504	3875571
NA	reverse	3877294	3878963
NA	reverse	3879065	3879706
NA	reverse	3894332	3894808
NA	reverse	3894877	3895911
NA	reverse	3901580	3902362
NA	reverse	3906090	3908272
NA	reverse	3908740	3909504
NA	reverse	3925257	3925511
NA	reverse	3925615	3926370
NA	reverse	3931056	3931937
NA	reverse	3939086	3940144
NA	reverse	3965117	3965971
NA	reverse	3969171	3970319
NA	reverse	3971489	3973594
NA	reverse	4008578	4008907
NA	reverse	4011378	4011809
NA	reverse	4024551	4026202
NA	reverse	4031588	4034069
NA	reverse	4045256	4048387
NA	reverse	4061770	4063893
NA	reverse	4068987	4072206
NA	reverse	4072450	4073733
NA	reverse	4077152	4081416
NA	reverse	4089383	4089814
NA	reverse	4091232	4093245
NA	reverse	4095896	4096789
NA	reverse	4107730	4108641
NA	reverse	4108837	4110979
NA	reverse	4115434	4117026
NA	reverse	4117919	4118551
NA	reverse	4119822	4123109
NA	reverse	4127099	4127785
NA	reverse	4128129	4129094
NA	reverse	4135139	4136281
NA	reverse	4136496	4137002
NA	reverse	4145464	4145865
NA	reverse	4152349	4154124
NA	reverse	4155789	4160223
NA	reverse	4164624	4166133
NA	reverse	4168546	4170536
NA	reverse	4170711	4171061
NA	reverse	4171244	4171951
NA	reverse	4174351	4175940
NA	reverse	4194004	4195932
NA	reverse	4199269	4201467
NA	reverse	4207180	4208721
NA	reverse	4209501	4211259
NA	reverse	4212329	4214307
NA	reverse	4215345	4217671
NA	reverse	4220494	4223049
NA	reverse	4236144	4237343
NA	reverse	4237417	4237866
NA	reverse	4253144	4255183
NA	reverse	4259749	4260651
NA	reverse	4274001	4275005
NA	reverse	4289371	4291783
NA	reverse	4298169	4298951
NA	reverse	4299668	4303079
NA	reverse	4306779	4310961
NA	reverse	4335035	4335652
NA	reverse	4345187	4347501
NA	reverse	4347632	4350664
NA	reverse	4351112	4351919
NA	reverse	4352054	4353159
NA	reverse	4357867	4359048
NA	reverse	4359137	4360276
NA	reverse	4360378	4362023
NA	reverse	4363190	4364500
NA	reverse	4365841	4369203
NA	reverse	4376844	4378040
NA	reverse	4384822	4385634
NA	reverse	4391560	4392918
NA	reverse	4412386	4413288
NA	reverse	4419713	4420588
NA	reverse	4421727	4422458
NA	reverse	4427833	4429186
NA	reverse	4442396	4444162
NA	reverse	4446391	4447014
NA	reverse	4481691	4482440
NA	reverse	4499207	4502000
NA	reverse	4502114	4507868
NA	reverse	4509070	4510215
NA	reverse	4510257	4511615
NA	reverse	4515983	4520479
NA	reverse	4530409	4531770
NA	reverse	4537734	4544043
NA	reverse	4544567	4549001
NA	reverse	4549111	4550645
NA	reverse	4551643	4552635
NA	reverse	4561030	4562088
NA	reverse	4572629	4576632
NA	reverse	4577077	4577454
NA	reverse	4580547	4583020
NA	reverse	4583157	4583726
NA	reverse	4585927	4586130
NA	reverse	4591238	4592722
NA	reverse	4592795	4593619
NA	reverse	4598188	4600403
NA	reverse	4604863	4605702
NA	reverse	4612649	4613884
NA	reverse	4616482	4617519
NA	reverse	4620225	4620785
NA	reverse	4631099	4633327
NA	reverse	4633563	4635619
NA	reverse	4642558	4643607
NA	reverse	4649638	4651542
NA	reverse	4656406	4658181
NA	reverse	4658346	4658876
NA	reverse	4662149	4665899
NA	reverse	4675997	4678527
NA	reverse	4682103	4685065
NA	reverse	4696353	4697912
NA	reverse	4702982	4704400
NA	reverse	4711781	4715144
NA	reverse	4722101	4722520
NA	reverse	4735450	4737193
NA	reverse	4744858	4745877
NA	reverse	4746970	4747911
NA	reverse	4748020	4748703
NA	reverse	4750546	4751322
NA	reverse	4761260	4761493
NA	reverse	4762009	4762434
NA	reverse	4763392	4764345
NA	reverse	4773215	4773610
NA	reverse	4775987	4778360
NA	reverse	4780784	4781434
NA	reverse	4790041	4790829
NA	reverse	4797779	4799951
NA	reverse	4802984	4806166
NA	reverse	4816867	4817568
NA	reverse	4831499	4833545
NA	reverse	4840050	4840871
NA	reverse	4840928	4841839
NA	reverse	4849172	4851148
NA	reverse	4852169	4852426
NA	reverse	4852480	4852725
NA	reverse	4852842	4853291
NA	reverse	4853383	4853550
NA	reverse	4862635	4866469
NA	reverse	4866692	4878535
NA	reverse	4878789	4884677
NA	reverse	4895224	4895700
NA	reverse	4897432	4898168
NA	reverse	4906701	4917507
NA	reverse	4917899	4930432
NA	reverse	4930632	4931810
NA	reverse	4932324	4940562
NA	reverse	4941173	4941604
NA	reverse	4942836	4943795
NA	reverse	4943865	4945123
NA	reverse	4952020	4952151
NA	reverse	4952288	4955171
NA	reverse	4955644	4957169
NA	reverse	4962745	4972880
NA	reverse	4972993	4973883
NA	reverse	4980026	4983310
NA	reverse	5022041	5022814
NA	reverse	5026822	5028078
NA	reverse	5029232	5032396
NA	reverse	5032471	5033878
NA	reverse	5033978	5038040
NA	reverse	5038205	5038795
NA	reverse	5044878	5045450
NA	reverse	5048269	5050811
NA	reverse	5051273	5051746
NA	reverse	5054897	5055799
NA	reverse	5060075	5061551
NA	reverse	5072714	5074343
NA	reverse	5083414	5084421
NA	reverse	5084536	5085537
NA	reverse	5130715	5132040
NA	reverse	5144637	5147017
NA	reverse	5160079	5163895
NA	reverse	5174419	5175905
NA	reverse	5181541	5182332
NA	reverse	5214554	5217106
NA	reverse	5223280	5223705
NA	reverse	5232749	5233456
NA	reverse	5239921	5240813
NA	reverse	5243628	5244719
NA	reverse	5288357	5289001
NA	reverse	5290815	5291081
NA	reverse	5362595	5364282
NA	reverse	5383305	5384843
NA	reverse	5394364	5394852
NA	reverse	5401640	5403235
NA	reverse	5411518	5412909
NA	reverse	5414255	5418872
NA	reverse	5439742	5441103
NA	reverse	5442038	5444184
NA	reverse	5446113	5447111
NA	reverse	5450114	5454727
NA	reverse	5456409	5456798
NA	reverse	5474607	5475221
NA	reverse	5476364	5476809
NA	reverse	5478166	5478444
NA	reverse	5481996	5482409
NA	reverse	5492827	5494200
NA	reverse	5494480	5496416
NA	reverse	5502057	5506796
NA	reverse	5520974	5523608
NA	reverse	5523804	5524406
NA	reverse	5536295	5539185
NA	reverse	5549900	5552224
NA	reverse	5564489	5564938
NA	reverse	5568938	5569414
NA	reverse	5572245	5574124
NA	reverse	5597947	5599253
NA	reverse	5639111	5640004
NA	reverse	5642679	5643569
NA	reverse	5644360	5645637
NA	reverse	5651247	5652182
NA	reverse	5667632	5668258
NA	reverse	5672656	5673585
NA	reverse	5678513	5681279
NA	reverse	5682853	5685955
NA	reverse	5688991	5689209
NA	reverse	5689539	5690378
NA	reverse	5690963	5692366
NA	reverse	5695402	5700483
NA	reverse	5749615	5751670
NA	reverse	5753858	5755174
NA	reverse	5755394	5757603
NA	reverse	5761035	5762586
NA	reverse	5765866	5767119
NA	reverse	5768719	5771732
NA	reverse	5772744	5774078
NA	reverse	5778373	5779266
NA	reverse	5779337	5783121
NA	reverse	5787767	5789079
NA	reverse	5796339	5799772
NA	reverse	5824507	5826470
NA	reverse	5839045	5840334
NA	reverse	5857011	5862782
NA	reverse	5865080	5866492
NA	reverse	5866676	5870439
NA	reverse	5870557	5871204
NA	reverse	5871281	5872372
NA	reverse	5875218	5877415
NA	reverse	5880991	5883537
NA	reverse	5885130	5886941
NA	reverse	5915852	5916688
NA	reverse	5930676	5931581
NA	reverse	5933103	5934032
NA	reverse	5957662	5958429
NA	reverse	6013782	6015224
NA	reverse	6017336	6018133
NA	reverse	6018152	6020128
NA	reverse	6033735	6034319
NA	reverse	6036946	6038400
NA	reverse	6040695	6042902
NA	reverse	6049297	6049972
NA	reverse	6059020	6060609
NA	reverse	6100299	6101683
NA	reverse	6109662	6114345
NA	reverse	6123449	6124768
NA	reverse	6133932	6135200
NA	reverse	6140394	6143270
NA	reverse	6145113	6146732
NA	reverse	6169019	6171007
NA	reverse	6182616	6183245
NA	reverse	6183475	6186734
NA	reverse	6189893	6190384
NA	reverse	6194758	6196585
NA	reverse	6198335	6205895
NA	reverse	6213220	6213624
NA	reverse	6219164	6220333
NA	reverse	6221897	6222811
NA	reverse	6230422	6231471
NA	reverse	6243935	6245008
NA	reverse	6247651	6250215
NA	reverse	6254034	6255197
NA	reverse	6261568	6262242
NA	reverse	6269976	6273062
NA	reverse	6282490	6283110
NA	reverse	6306979	6310708
NA	reverse	6311131	6312102
NA	reverse	6312498	6312629
NA	reverse	6312766	6315656
NA	reverse	6316129	6317654
NA	reverse	6318229	6319545
NA	reverse	6333258	6334151
NA	reverse	6335270	6339712
NA	reverse	6340863	6342017
NA	reverse	6342074	6344536
NA	reverse	6358152	6358262
NA	reverse	6358310	6359599
NA	reverse	6377112	6377660
NA	reverse	6381099	6382007
NA	reverse	6385222	6386697
NA	reverse	6387982	6389235
NA	reverse	6397997	6400920
NA	reverse	6431866	6433616
NA	reverse	6439037	6440326
NA	reverse	6441760	6442989
NA	reverse	6443094	6444428
NA	reverse	6450236	6450829
NA	reverse	6464424	6465347
NA	reverse	6476342	6479448
NA	reverse	6481281	6481781
NA	reverse	6485386	6485952
NA	reverse	6487668	6490389
NA	reverse	6500848	6503107
NA	reverse	6503614	6504807
NA	reverse	6507745	6508989
NA	reverse	6518218	6518991
NA	reverse	6532927	6533310
442	forward	483	3159	40	T
3084	forward	3169	4278	84	T
4182	forward	4275	6695	92	A
8453	forward	8671	10377	217	G
13436	forward	13540	14091	103	G
14213	forward	14236	15123	22	T
21652	forward	21733	22758	80	A
23999	forward	24022	24579	22	A
25701	forward	25757	27556	55	C
27643	forward	27667	30519	23	T
34576	forward	34645	35559	68	G
35475	forward	35570	35947	94	A
40158	forward	40211	40426	52	A
40438	forward	40610	40837	171	A
54844	forward	54909	55304	64	A
57123	forward	57148	58476	24	G
58999	forward	59018	60088	18	T
63570	forward	63701	63841	130	G
71086	forward	71112	71567	25	A
71625	forward	71678	71911	52	A
76328	forward	76354	78671	25	G
97663	forward	97777	98811	113	A
98785	forward	98900	100927	114	A
100936	forward	101003	101491	66	A
105773	forward	105874	110560	100	T
113230	forward	113281	121410	50	G
121654	forward	121786	122514	131	A
125157	forward	125293	129482	135	G
133084	forward	133174	133809	89	A
134415	forward	134433	134906	17	A
135890	forward	135915	136502	24	A
136662	forward	136732	138081	69	G
139720	forward	139831	140241	110	G
142861	forward	142886	143386	24	A
143428	forward	143458	143799	29	G
156127	forward	156164	156727	36	T
159743	forward	159868	161217	124	A
161303	forward	161387	162376	83	A
167037	forward	167065	168015	27	A
173568	forward	173624	174959	55	T
176108	forward	176167	181429	58	A
181430	forward	181628	182566	197	G
183070	forward	183147	183299	76	A
183406	forward	183454	184788	47	T
190534	forward	190557	191818	22	A
220671	forward	220837	223775	165	T
224050	forward	224119	226082	68	C
226664	forward	226691	227272	26	G
227357	forward	227383	234756	25	A
244719	forward	244942	245481	222	G
245590	forward	245632	248464	41	A
249899	forward	249935	252532	35	A
259382	forward	259470	260348	87	G
265545	forward	265574	266242	28	A
278398	forward	278510	279531	111	G
291633	forward	291676	293936	42	A
293823	forward	294101	298367	277	A
298411	forward	298567	299717	155	T
309547	forward	309749	311728	201	A
312525	forward	312549	312912	23	A
313596	forward	313663	315114	66	A
315131	forward	315359	316639	227	A
316788	forward	316965	318164	176	C
319822	forward	319880	321054	57	A
334862	forward	334920	336098	57	A
339822	forward	339852	340823	29	G
341409	forward	341437	342828	27	A
348827	forward	348859	349611	31	A
349571	forward	349652	351010	80	C
350728	forward	351076	352446	347	T
352350	forward	352562	353665	211	C
353997	forward	354084	355181	86	A
355220	forward	355236	358250	15	C
360929	forward	360946	361998	16	A
363261	forward	363273	364214	11	C
365104	forward	365104	365733	-1	A
366553	forward	366575	367069	21	C
368789	forward	368901	369338	111	A
370760	forward	370829	372223	68	C
372228	forward	372315	374068	86	T
374125	forward	374152	374502	26	A
381633	forward	381663	382592	29	A
386232	forward	386260	387774	27	T
387815	forward	387894	390147	78	G
392242	forward	392268	395049	25	A
395050	forward	395075	396205	24	T
397067	forward	397086	397889	18	C
397877	forward	397899	398699	21	T
398847	forward	398905	399699	57	T
414330	forward	414409	415233	78	A
415271	forward	415292	416759	20	G
416805	forward	416842	417186	36	A
417391	forward	417456	418442	64	A
432223	forward	432275	435305	51	C
435396	forward	435419	436273	22	G
438434	forward	438455	439252	20	T
439259	forward	439406	440077	146	C
451099	forward	451306	453666	206	G
454689	forward	454728	455132	38	A
455347	forward	455375	457929	27	C
464260	forward	464377	465783	116	A
465832	forward	465868	479311	35	A
483127	forward	483161	484651	33	G
484809	forward	484832	485988	22	T
486754	forward	486775	492541	20	T
503460	forward	503481	504101	20	A
517306	forward	517400	518308	93	G
518319	forward	518460	518864	140	A
[truncated: 1,803 more rows]

## Sheet: PAO1DistGenes
Pseudomonas aeruginosa PAO1 Distance between pairs of genes
Data source: biocyc.org v20.5
Description of Columns
1.- Gene name
2.- Columns 2 and 3 contains the start and end gene coordinates(start and end)
4.-Distance in nucleotides between the end of gene 1 and the beggining of gene 2
5.-Transcription-Direction (strand)
Gene Name	Left	Right	Dist_Gen2	Strand
GCXG-1412	1512260	1514035	0	forward
GCXG-1500	1604599	1605087	0	forward
GCXG-2279	2474442	2475494	0	forward
GCXG-2316	2513179	2513841	0	forward
GCXG-667	716011	716730	0	forward
GCXG-977	1045832	1046461	0	forward
GCXG-1454	1559966	1561918	0	reverse
GCXG-1829	1950439	1951725	0	reverse
GCXG-2440	2693781	2694545	0	reverse
GCXG-2615	2923961	2925787	0	reverse
GCXG-4302	4757124	4758452	0	reverse
GCXG-4413	4870428	4871912	0	reverse
GCXG-4528	4986811	4987284	0	reverse
GCXG-5186	5726357	5727238	0	reverse
GCXG-5558	6135968	6137113	0	reverse
GCXG-1039	1107000	1107761	1	forward
GCXG-1121	1194207	1195223	1	forward
GCXG-1171	1243594	1245663	1	forward
GCXG-1293	1384361	1385668	1	forward
GCXG-1465	1573551	1574024	1	forward
GCXG-1741	1859493	1861295	1	forward
GCXG-200	228223	228942	1	forward
GCXG-2089	2253819	2255627	1	forward
GCXG-2090	2255629	2256702	1	forward
GCXG-2091	2256704	2257720	1	forward
GCXG-211	238896	239777	1	forward
GCXG-2132	2312899	2313789	1	forward
GCXG-2272	2465102	2466538	1	forward
GCXG-2401	2619695	2620711	1	forward
GCXG-2670	2983963	2985744	1	forward
GCXG-2755	3077312	3079195	1	forward
GCXG-2926	3239711	3240589	1	forward
GCXG-3249	3593144	3593731	1	forward
GCXG-3260	3601596	3602390	1	forward
GCXG-3381	3738775	3740103	1	forward
GCXG-3493	3845775	3846335	1	forward
GCXG-4099	4520942	4522744	1	forward
GCXG-429	473191	476331	1	forward
GCXG-4435	4892345	4892746	1	forward
GCXG-4538	4994763	4995227	1	forward
GCXG-4632	5100683	5104168	1	forward
GCXG-4748	5236774	5237391	1	forward
GCXG-4890	5380580	5381143	1	forward
GCXG-4962	5462763	5463605	1	forward
GCXG-498	553005	554381	1	forward
GCXG-528	582455	583855	1	forward
GCXG-603	657667	658341	1	forward
GCXG-625	678286	678819	1	forward
GCXG-653	703477	704082	1	forward
GCXG-88	104006	104851	1	forward
GCXG-986	1053400	1053846	1	forward
GCXG-461	515653	516027	1	reverse
GCXG-935	1002681	1003964	1	reverse
GCXG-965	1036158	1036577	1	reverse
GCXG-1520	1626062	1627495	1	reverse
GCXG-1839	1962046	1963656	1	reverse
GCXG-1894	2020625	2021710	1	reverse
GCXG-2098	2265761	2266429	1	reverse
GCXG-2234	2421343	2422020	1	reverse
GCXG-2562	2864170	2865105	1	reverse
GCXG-2642	2952017	2953414	1	reverse
GCXG-2920	3233343	3234254	1	reverse
GCXG-3100	3421696	3423066	1	reverse
GCXG-3140	3475956	3476480	1	reverse
GCXG-3398	3757659	3759374	1	reverse
GCXG-3557	3918251	3918469	1	reverse
GCXG-3615	3988838	3990595	1	reverse
GCXG-3808	4202573	4203322	1	reverse
GCXG-3858	4259255	4260397	1	reverse
GCXG-4078	4497573	4497848	1	reverse
GCXG-4278	4722851	4724356	1	reverse
GCXG-4439	4896523	4897425	1	reverse
GCXG-4724	5211632	5212105	1	reverse
GCXG-4744	5231653	5232483	1	reverse
GCXG-4763	5249599	5250618	1	reverse
GCXG-5227	5777134	5777388	1	reverse
GCXG-5289	5839105	5840895	1	reverse
GCXG-5627	6209479	6210063	1	reverse
GCXG-5632	6214434	6215801	1	reverse
GCXG-1226	1305583	1306056	2	forward
GCXG-1300	1391277	1391861	2	forward
GCXG-1469	1575559	1576335	2	forward
GCXG-1692	1816855	1818186	2	forward
GCXG-1713	1837388	1838257	2	forward
GCXG-1743	1862558	1862761	2	forward
GCXG-1744	1862764	1863021	2	forward
GCXG-1755	1872602	1874014	2	forward
GCXG-1784	1898816	1901521	2	forward
GCXG-1799	1919322	1919576	2	forward
GCXG-1846	1972195	1972956	2	forward
GCXG-2226	2412857	2414251	2	forward
GCXG-2271	2463996	2465099	2	forward
GCXG-2295	2493218	2493934	2	forward
GCXG-2658	2971111	2971731	2	forward
GCXG-2730	3053844	3055151	2	forward
GCXG-3300	3639366	3640163	2	forward
GCXG-3547	3908412	3910736	2	forward
GCXG-3896	4298311	4299201	2	forward
GCXG-4089	4510971	4511636	2	forward
GCXG-4122	4541951	4542655	2	forward
GCXG-4589	5056095	5056775	2	forward
GCXG-4726	5212833	5213471	2	forward
GCXG-4871	5362146	5363195	2	forward
GCXG-5015	5517821	5518480	2	forward
GCXG-5222	5772298	5773374	2	forward
GCXG-5649	6232555	6233115	2	forward
GCXG-643	692898	693593	2	forward
GCXG-726	785969	786925	2	forward
GCXG-988	1054566	1055006	2	forward
GCXG-670	717635	718726	2	reverse
GCXG-944	1011983	1012972	2	reverse
GCXG-1057	1125865	1126338	2	reverse
GCXG-1089	1157954	1158655	2	reverse
GCXG-1717	1842299	1842565	2	reverse
GCXG-1888	2014915	2015136	2	reverse
GCXG-2856	3173759	3173834	2	reverse
GCXG-3204	3539128	3540207	2	reverse
GCXG-3330	3674570	3675160	2	reverse
GCXG-3334	3677720	3678331	2	reverse
GCXG-3693	4070012	4070857	2	reverse
GCXG-3710	4091671	4092228	2	reverse
GCXG-3931	4335276	4335959	2	reverse
GCXG-4003	4420204	4421799	2	reverse
GCXG-4108	4530743	4531387	2	reverse
GCXG-4255	4693112	4693756	2	reverse
GCXG-4304	4758891	4759067	2	reverse
GCXG-4313	4762659	4762925	2	reverse
GCXG-4449	4909401	4910105	2	reverse
GCXG-4492	4954630	4955571	2	reverse
GCXG-4520	4981046	4982101	2	reverse
GCXG-4548	5002455	5003897	2	reverse
GCXG-4698	5177655	5178902	2	reverse
GCXG-4783	5273514	5274005	2	reverse
GCXG-4836	5326018	5326932	2	reverse
GCXG-4843	5332354	5332743	2	reverse
GCXG-1267	1352525	1353823	3	forward
GCXG-1326	1417500	1417961	3	forward
GCXG-1338	1429082	1431058	3	forward
GCXG-1501	1605088	1607061	3	forward
GCXG-1606	1721124	1721492	3	forward
GCXG-1980	2133391	2134389	3	forward
GCXG-2088	2251275	2253815	3	forward
GCXG-2203	2393708	2394178	3	forward
GCXG-2280	2475495	2476781	3	forward
GCXG-3082	3403812	3404141	3	forward
GCXG-3285	3625201	3626562	3	forward
GCXG-3384	3742265	3742690	3	forward
GCXG-3542	3900233	3902659	3	forward
GCXG-3601	3971586	3973010	3	forward
GCXG-4602	5071567	5072691	3	forward
GCXG-5055	5561599	5562414	3	forward
GCXG-507	562721	563545	3	forward
GCXG-5256	5805206	5805676	3	forward
GCXG-728	789360	789650	3	forward
GCXG-735	792637	792993	3	forward
GCXG-263	293301	293798	3	reverse
GCXG-282	313938	314927	3	reverse
GCXG-541	595245	596270	3	reverse
GCXG-1652	1771122	1772651	3	reverse
GCXG-1791	1909698	1910681	3	reverse
GCXG-2111	2289085	2290335	3	reverse
GCXG-2189	2376538	2377476	3	reverse
GCXG-2766	3099810	3100112	3	reverse
GCXG-3039	3354947	3356158	3	reverse
GCXG-3155	3490752	3491411	3	reverse
GCXG-3203	3537808	3539124	3	reverse
GCXG-3455	3806070	3807242	3	reverse
GCXG-3504	3853413	3854237	3	reverse
GCXG-3700	4081045	4082181	3	reverse
GCXG-3726	4107505	4108485	3	reverse
GCXG-3909	4311951	4312703	3	reverse
GCXG-3989	4403891	4404898	3	reverse
GCXG-4303	4758453	4758887	3	reverse
GCXG-4305	4759070	4759570	3	reverse
GCXG-4481	4941810	4942673	3	reverse
GCXG-4525	4985782	4985843	3	reverse
GCXG-4697	5176680	5177651	3	reverse
GCXG-4939	5434116	5434652	3	reverse
GCXG-5101	5619608	5621026	3	reverse
GCXG-5333	5885954	5887078	3	reverse
GCXG-5486	6053412	6054590	3	reverse
GCXG-5563	6141666	6143105	3	reverse
GCXG-1107	1175614	1176375	4	forward
GCXG-1117	1189172	1190380	4	forward
GCXG-1726	1848707	1849072	4	forward
GCXG-2021	2173912	2175057	4	forward
GCXG-3149	3483642	3484349	4	forward
GCXG-3592	3959033	3959950	4	forward
GCXG-3663	4041079	4042170	4	forward
GCXG-4469	4927998	4930094	4	forward
GCXG-4747	5234997	5236769	4	forward
GCXG-4829	5318575	5321841	4	forward
GCXG-5616	6198055	6198912	4	forward
GCXG-5634	6217313	6218095	4	forward
GCXG-707	770847	771326	4	forward
GCXG-734	791370	792632	4	forward
GCXG-29	30502	32055	4	reverse
GCXG-1818	1941720	1942442	4	reverse
GCXG-1840	1963658	1964677	4	reverse
GCXG-1881	2008308	2009477	4	reverse
GCXG-1914	2049949	2052144	4	reverse
GCXG-2040	2196129	2197427	4	reverse
GCXG-2627	2939646	2940797	4	reverse
GCXG-2706	3021796	3022983	4	reverse
GCXG-2810	3132229	3132816	4	reverse
GCXG-3146	3480246	3480692	4	reverse
GCXG-3733	4116188	4119265	4	reverse
GCXG-3738	4123261	4123956	4	reverse
GCXG-3764	4150196	4150711	4	reverse
GCXG-3976	4385900	4386352	4	reverse
GCXG-4561	5017960	5018751	4	reverse
GCXG-5207	5751857	5752459	4	reverse
GCXG-5324	5880000	5880482	4	reverse
GCXG-5365	5922544	5923290	4	reverse
GCXG-5457	6019482	6019883	4	reverse
GCXG-5518	6084369	6084545	4	reverse
GCXG-1096	1164275	1164682	5	forward
GCXG-1120	1192405	1194201	5	forward
GCXG-1350	1441632	1442063	5	forward
GCXG-168	191697	192362	5	forward
GCXG-1690	1815153	1816346	5	forward
GCXG-217	243431	243835	5	forward
GCXG-2230	2417410	2417754	5	forward
GCXG-2420	2643306	2645297	5	forward
GCXG-2802	3126252	3127220	5	forward
GCXG-2998	3317524	3318657	5	forward
GCXG-5330	5884320	5884502	5	forward
GCXG-556	610214	611275	5	forward
GCXG-778	835523	837322	5	forward
GCXG-175	198080	198682	5	reverse
GCXG-956	1029825	1030151	5	reverse
GCXG-1576	1690510	1690695	5	reverse
GCXG-1580	1694042	1694227	5	reverse
GCXG-1792	1910685	1912211	5	reverse
GCXG-1930	2066786	2067955	5	reverse
GCXG-3004	3321704	3322753	5	reverse
GCXG-3066	3387850	3389430	5	reverse
GCXG-3103	3425555	3426922	5	reverse
GCXG-3566	3926791	3927552	5	reverse
GCXG-3672	4051097	4051558	5	reverse
GCXG-3932	4335962	4336702	5	reverse
GCXG-4330	4780768	4780833	5	reverse
GCXG-4676	5149633	5151072	5	reverse
GCXG-5494	6062352	6063347	5	reverse
GCXG-1337	1428080	1429075	6	forward
GCXG-1686	1809737	1810744	6	forward
GCXG-2313	2510622	2511050	6	forward
GCXG-2662	2975291	2975716	6	forward
GCXG-3272	3612559	3613488	6	forward
GCXG-3835	4235220	4236599	6	forward
GCXG-80	95048	96397	6	reverse
GCXG-1841	1964682	1965764	6	reverse
GCXG-3075	3397096	3397374	6	reverse
GCXG-3145	3479721	3480239	6	reverse
GCXG-3801	4195400	4196158	6	reverse
GCXG-3867	4267372	4267710	6	reverse
GCXG-4477	4938276	4939187	6	reverse
GCXG-5136	5672366	5674021	6	reverse
GCXG-5353	5911262	5912020	6	reverse
GCXG-1067	1136388	1137035	7	forward
GCXG-1463	1572023	1572544	7	forward
GCXG-1552	1668455	1668832	7	forward
GCXG-2301	2500485	2501075	7	forward
GCXG-2679	2994728	2996257	7	forward
GCXG-418	462565	463071	7	forward
GCXG-4264	4705956	4706402	7	forward
GCXG-4817	5306989	5308425	7	forward
GCXG-5097	5615652	5616302	7	forward
GCXG-525	581133	581660	7	forward
GCXG-5280	5831902	5832741	7	forward
GCXG-5425	5989460	5990668	7	forward
GCXG-5512	6082290	6082859	7	forward
GCXG-642	692549	692890	7	forward
GCXG-690	738719	739168	7	forward
GCXG-34	35905	36270	7	reverse
GCXG-76	87000	90098	7	reverse
GCXG-392	430002	430622	7	reverse
GCXG-679	730679	732094	7	reverse
GCXG-1052	1123148	1123348	7	reverse
GCXG-1807	1928666	1928886	7	reverse
GCXG-2339	2546652	2547500	7	reverse
GCXG-2773	3106919	3106994	7	reverse
GCXG-3776	4165719	4165880	7	reverse
GCXG-3869	4269619	4270140	7	reverse
GCXG-4064	4485349	4485816	7	reverse
GCXG-5063	5572222	5574486	7	reverse
GCXG-5325	5880487	5881671	7	reverse
GCXG-1647	1766285	1766947	8	forward
GCXG-1731	1852288	1853172	8	forward
GCXG-1735	1855862	1856299	8	forward
GCXG-1736	1856308	1856553	8	forward
GCXG-1748	1864134	1864880	8	forward
GCXG-2269	2461460	2462788	8	forward
GCXG-2821	3141719	3142276	8	forward
GCXG-2896	3209289	3209972	8	forward
GCXG-4145	4570096	4570920	8	forward
GCXG-4351	4794404	4795633	8	forward
GCXG-4532	4990285	4990824	8	forward
GCXG-4961	5462302	5462754	8	forward
GCXG-4963	5463607	5463909	8	forward
GCXG-5542	6113902	6114351	8	forward
GCXG-703	767173	767592	8	forward
GCXG-774	831914	832498	8	forward
GCXG-949	1020708	1021607	8	forward
GCXG-172	194206	194748	8	reverse
GCXG-519	576037	576489	8	reverse
GCXG-973	1040724	1041680	8	reverse
GCXG-1196	1276117	1276608	8	reverse
GCXG-1891	2017967	2018794	8	reverse
GCXG-2259	2448568	2449545	8	reverse
GCXG-2493	2785370	2786356	8	reverse
GCXG-3195	3529508	3530458	8	reverse
GCXG-3564	3925369	3926238	8	reverse
GCXG-3754	4138007	4139302	8	reverse
GCXG-4061	4481230	4482252	8	reverse
GCXG-4079	4497850	4498479	8	reverse
GCXG-4109	4531390	4532136	8	reverse
GCXG-4250	4688889	4689893	8	reverse
GCXG-4343	4786021	4786725	8	reverse
GCXG-4909	5397690	5398619	8	reverse
GCXG-5046	5551681	5553108	8	reverse
GCXG-5185	5725479	5726348	8	reverse
GCXG-107	127378	128502	9	forward
GCXG-1730	1851982	1852278	9	forward
GCXG-1820	1943067	1944737	9	forward
GCXG-2	2056	3159	9	forward
GCXG-2018	2171989	2172903	9	forward
GCXG-2732	3056890	3057366	9	forward
GCXG-2908	3221652	3222140	9	forward
GCXG-3268	3609905	3610240	9	forward
GCXG-3376	3726452	3728230	9	forward
GCXG-343	382914	383717	9	forward
GCXG-4098	4520198	4520932	9	forward
GCXG-4201	4632873	4634129	9	forward
GCXG-4442	4899696	4901117	9	forward
GCXG-4738	5226026	5226982	9	forward
GCXG-631	683599	685836	9	forward
GCXG-709	772275	772700	9	forward
GCXG-796	857998	858636	9	forward
GCXG-991	1057400	1057906	9	forward
GCXG-77	90106	90834	9	reverse
GCXG-2009	2163010	2163873	9	reverse
GCXG-2387	2603560	2604705	9	reverse
GCXG-2628	2940802	2941884	9	reverse
GCXG-2629	2941894	2942838	9	reverse
GCXG-2644	2954818	2956143	9	reverse
GCXG-3342	3685759	3686574	9	reverse
GCXG-3434	3787021	3787479	9	reverse
GCXG-4336	4783228	4783761	9	reverse
GCXG-4363	4816580	4819348	9	reverse
GCXG-4370	4824121	4825032	9	reverse
GCXG-4373	4827185	4828369	9	reverse
GCXG-4618	5087011	5087087	9	reverse
GCXG-4798	5287069	5287962	9	reverse
GCXG-4846	5334921	5335772	9	reverse
GCXG-5326	5881679	5883013	9	reverse
GCXG-5458	6019888	6021114	9	reverse
GCXG-5671	6254972	6255844	9	reverse
GCXG-1079	1147928	1148833	10	forward
GCXG-108	128512	130104	10	forward
GCXG-1080	1148844	1149941	10	forward
GCXG-109	130115	130669	10	forward
GCXG-1103	1169822	1170931	10	forward
GCXG-1340	1431691	1432026	10	forward
GCXG-1430	1533238	1534278	10	forward
GCXG-155	174773	175492	10	forward
GCXG-1595	1712908	1714053	10	forward
GCXG-1656	1775849	1776034	10	forward
GCXG-1687	1810751	1813384	10	forward
GCXG-2116	2295013	2295522	10	forward
GCXG-2128	2307957	2309432	10	forward
GCXG-2171	2355918	2356157	10	forward
GCXG-2183	2366106	2368100	10	forward
GCXG-233	261179	261970	10	forward
GCXG-2370	2583483	2584415	10	forward
GCXG-2377	2592084	2593319	10	forward
GCXG-2403	2624204	2626210	10	forward
GCXG-2668	2982781	2983194	10	forward
GCXG-3043	3360875	3364321	10	forward
GCXG-3112	3442823	3443803	10	forward
GCXG-32	34624	35538	10	forward
GCXG-3251	3594208	3594570	10	forward
GCXG-4036	4455887	4456684	10	forward
GCXG-4084	4505508	4506902	10	forward
GCXG-4180	4609567	4610226	10	forward
GCXG-4183	4612605	4613528	10	forward
GCXG-437	484964	487156	10	forward
GCXG-4443	4901127	4902191	10	forward
GCXG-497	552746	552994	10	forward
GCXG-4989	5487715	5488386	10	forward
GCXG-5258	5807173	5808357	10	forward
GCXG-5380	5941336	5941476	10	forward
GCXG-5381	5941487	5942734	10	forward
GCXG-702	765315	767162	10	forward
GCXG-894	964372	965574	10	forward
GCXG-984	1051673	1052278	10	forward
GCXG-283	314931	315800	10	reverse
GCXG-395	434226	434819	10	reverse
GCXG-514	572583	573422	10	reverse
GCXG-763	819855	821372	10	reverse
GCXG-808	874206	875102	10	reverse
GCXG-1192	1272200	1272796	10	reverse
GCXG-1193	1272807	1273298	10	reverse
GCXG-1277	1365218	1365862	10	reverse
GCXG-1581	1694233	1694841	10	reverse
GCXG-1590	1708004	1709401	10	reverse
GCXG-2474	2743800	2746679	10	reverse
GCXG-2619	2929583	2930797	10	reverse
GCXG-3035	3351656	3352879	10	reverse
GCXG-3355	3703022	3703156	10	reverse
GCXG-3560	3921270	3922073	10	reverse
GCXG-3727	4108489	4110336	10	reverse
GCXG-3878	4276154	4277074	10	reverse
GCXG-4306	4759574	4759924	10	reverse
GCXG-4617	5086925	5087000	10	reverse
GCXG-4795	5284370	5285257	10	reverse
GCXG-4850	5338973	5339380	10	reverse
GCXG-5008	5509551	5510828	10	reverse
GCXG-5159	5700758	5701687	10	reverse
GCXG-5238	5788614	5789384	10	reverse
GCXG-1102	1169115	1169810	11	forward
GCXG-1607	1721496	1723268	11	forward
GCXG-1657	1776045	1777739	11	forward
GCXG-1733	1853665	1854837	11	forward
GCXG-2296	2493937	2495712	11	forward
GCXG-2310	2508293	2508763	11	forward
GCXG-2674	2990435	2991430	11	forward
GCXG-2675	2991442	2991990	11	forward
GCXG-271	305725	306162	11	forward
GCXG-2873	3187546	3189138	11	forward
GCXG-3048	3367903	3368517	11	forward
GCXG-3891	4290427	4290855	11	forward
GCXG-415	453239	454114	11	forward
GCXG-425	470081	470650	11	forward
GCXG-4577	5042068	5043078	11	forward
GCXG-4631	5100084	5100671	11	forward
GCXG-5303	5853585	5855924	11	forward
GCXG-638	689537	690031	11	forward
GCXG-909	979329	980345	11	forward
GCXG-5	7018	7791	11	reverse
GCXG-396	434830	435651	11	reverse
GCXG-758	813329	814492	11	reverse
GCXG-957	1030157	1030411	11	reverse
GCXG-1024	1092025	1092498	11	reverse
GCXG-1460	1569302	1569709	11	reverse
GCXG-1573	1687373	1687912	11	reverse
GCXG-1633	1751674	1752891	11	reverse
GCXG-1803	1922295	1923032	11	reverse
GCXG-2254	2444886	2445533	11	reverse
GCXG-2429	2657798	2665144	11	reverse
GCXG-2467	2734157	2735182	11	reverse
GCXG-2563	2865107	2865736	11	reverse
GCXG-2625	2937585	2938541	11	reverse
GCXG-3045	3365007	3365744	11	reverse
GCXG-3165	3502642	3503280	11	reverse
GCXG-3177	3513154	3514011	11	reverse
GCXG-3559	3919774	3921258	11	reverse
GCXG-3933	4336708	4338249	11	reverse
GCXG-3935	4342122	4343528	11	reverse
GCXG-3972	4382010	4382900	11	reverse
GCXG-4032	4450447	4450878	11	reverse
GCXG-4307	4759935	4760468	11	reverse
GCXG-4315	4763119	4763532	11	reverse
GCXG-4319	4764880	4765701	11	reverse
GCXG-4500	4961151	4961558	11	reverse
GCXG-4515	4974694	4976595	11	reverse
GCXG-4527	4986152	4986799	11	reverse
GCXG-4642	5113005	5113469	11	reverse
GCXG-4853	5343105	5343755	11	reverse
GCXG-5066	5576028	5577917	11	reverse
GCXG-5138	5675184	5675702	11	reverse
GCXG-5419	5985716	5985871	11	reverse
GCXG-5666	6252159	6252695	11	reverse
GCXG-1097	1164688	1165128	12	forward
GCXG-1216	1297309	1298709	12	forward
GCXG-1250	1331517	1331714	12	forward
GCXG-1383	1474391	1474714	12	forward
GCXG-1481	1590533	1591273	12	forward
GCXG-1683	1805753	1807228	12	forward
GCXG-1916	2052941	2053264	12	forward
GCXG-2011	2165213	2165863	12	forward
GCXG-2120	2298012	2300663	12	forward
GCXG-2398	2617019	2617516	12	forward
GCXG-2496	2788011	2789072	12	forward
GCXG-2498	2789861	2791207	12	forward
GCXG-3600	3969942	3971573	12	forward
GCXG-3721	4103732	4104079	12	forward
GCXG-3805	4198843	4199643	12	forward
GCXG-3830	4230162	4231058	12	forward
GCXG-3950	4356201	4356863	12	forward
GCXG-4186	4615346	4616149	12	forward
GCXG-4265	4706410	4707522	12	forward
GCXG-4556	5013671	5013961	12	forward
GCXG-4872	5363198	5364058	12	forward
GCXG-628	681394	682554	12	forward
GCXG-731	790617	790709	12	forward
GCXG-732	790722	790973	12	forward
GCXG-85	101247	101765	12	forward
GCXG-1530	1638379	1638639	12	reverse
GCXG-1895	2021712	2022398	12	reverse
GCXG-1951	2091490	2091837	12	reverse
GCXG-2192	2379310	2381460	12	reverse
GCXG-2208	2396536	2396883	12	reverse
GCXG-3027	3343799	3345100	12	reverse
GCXG-3107	3434373	3435359	12	reverse
GCXG-3121	3452872	3455253	12	reverse
GCXG-3881	4279389	4280507	12	reverse
GCXG-4063	4483396	4485336	12	reverse
GCXG-4311	4761940	4762254	12	reverse
GCXG-4316	4763544	4764230	12	reverse
GCXG-4317	4764243	4764575	12	reverse
GCXG-4542	4997439	4998050	12	reverse
GCXG-5042	5547083	5548384	12	reverse
GCXG-5409	5973833	5974177	12	reverse
GCXG-1123	1196021	1197376	13	forward
GCXG-1145	1216671	1218167	13	forward
GCXG-1333	1423374	1424732	13	forward
GCXG-1507	1610745	1612112	13	forward
GCXG-1638	1758748	1759770	13	forward
GCXG-1761	1878980	1880185	13	forward
GCXG-1789	1906842	1908440	13	forward
GCXG-1873	1998587	1998949	13	forward
GCXG-1937	2073555	2075438	13	forward
GCXG-2180	2364311	2364802	13	forward
GCXG-2308	2506614	2506964	13	forward
GCXG-3083	3404145	3404525	13	forward
GCXG-3385	3742694	3743686	13	forward
GCXG-3597	3965842	3967011	13	forward
GCXG-4211	4645594	4646706	13	forward
GCXG-4273	4716660	4718543	13	forward
GCXG-4537	4994441	4994749	13	forward
GCXG-5167	5706552	5706800	13	forward
GCXG-5514	6083105	6083509	13	forward
GCXG-868	935427	935975	13	forward
GCXG-903	973770	974468	13	forward
GCXG-912	982885	984231	13	forward
GCXG-913	984245	984535	13	forward
GCXG-574	623368	623838	13	reverse
GCXG-1437	1539749	1541131	13	reverse
GCXG-1984	2137846	2138598	13	reverse
GCXG-2045	2202649	2203446	13	reverse
GCXG-3011	3328203	3328385	13	reverse
GCXG-3086	3406321	3408546	13	reverse
GCXG-3565	3926247	3926777	13	reverse
GCXG-3988	4403707	4403877	13	reverse
GCXG-4309	4761062	4761367	13	reverse
GCXG-4321	4766009	4766611	13	reverse
GCXG-4374	4828379	4829629	13	reverse
GCXG-4486	4947330	4948676	13	reverse
GCXG-5501	6069156	6069830	13	reverse
GCXG-5660	6245803	6246312	13	reverse
GCXG-2266	2457510	2458280	14	forward
GCXG-2605	2913922	2914359	14	forward
GCXG-3603	3974359	3975921	14	forward
GCXG-4155	4579510	4580568	14	forward
GCXG-4624	5093378	5094970	14	forward
GCXG-5001	5503051	5504106	14	forward
GCXG-5162	5702669	5703439	14	forward
GCXG-5251	5800527	5801300	14	forward
GCXG-5257	5805680	5807158	14	forward
GCXG-629	682567	683070	14	forward
GCXG-891	961370	962530	14	forward
GCXG-1441	1545837	1546256	14	reverse
GCXG-1577	1690701	1691312	14	reverse
GCXG-1875	1999512	1999874	14	reverse
GCXG-3000	3318883	3319659	14	reverse
GCXG-3198	3532812	3533933	14	reverse
GCXG-3339	3681500	3684148	14	reverse
GCXG-3554	3915807	3916763	14	reverse
GCXG-3788	4182075	4182770	14	reverse
GCXG-4505	4965109	4965501	14	reverse
GCXG-4550	5004798	5008628	14	reverse
GCXG-4842	5332254	5332339	14	reverse
GCXG-5013	5516399	5517094	14	reverse
GCXG-5644	6228241	6229443	14	reverse
GCXG-5678	6263805	6264212	14	reverse
GCXG-1041	1108949	1109866	15	forward
GCXG-1415	1516433	1516687	15	forward
GCXG-1693	1818189	1819058	15	forward
GCXG-214	240931	241737	15	forward
GCXG-232	259784	261163	15	forward
GCXG-3222	3564445	3565173	15	forward
GCXG-3940	4348186	4348650	15	forward
GCXG-428	472024	473175	15	forward
GCXG-5267	5817191	5818186	15	forward
GCXG-5507	6075334	6075864	15	forward
GCXG-993	1058812	1059606	15	forward
GCXG-81	96404	97738	15	reverse
GCXG-95	113303	114595	15	reverse
GCXG-324	360413	361447	15	reverse
GCXG-502	557354	558361	15	reverse
GCXG-551	603706	604896	15	reverse
GCXG-573	622894	623352	15	reverse
GCXG-1650	1769047	1770321	15	reverse
GCXG-2050	2208169	2211306	15	reverse
GCXG-3624	4001196	4002092	15	reverse
GCXG-3709	4090900	4091655	15	reverse
GCXG-3802	4196165	4196692	15	reverse
GCXG-5200	5745895	5746833	15	reverse
GCXG-5471	6033211	6034044	15	reverse
GCXG-5545	6116493	6118316	15	reverse
GCXG-5598	6180048	6180926	15	reverse
GCXG-5658	6243111	6244946	15	reverse
GCXG-1408	1507164	1508720	16	forward
GCXG-2511	2803345	2803623	16	forward
GCXG-2744	3068040	3070349	16	forward
GCXG-3077	3398104	3398700	16	forward
GCXG-3172	3509324	3510127	16	forward
GCXG-3449	3801104	3801931	16	forward
GCXG-3815	4207408	4208151	16	forward
GCXG-3817	4209256	4210278	16	forward
GCXG-4731	5216764	5217552	16	forward
GCXG-4964	5463918	5464436	16	forward
GCXG-5427	5991168	5993774	16	forward
GCXG-730	790166	790600	16	forward
GCXG-902	973064	973753	16	forward
GCXG-983	1051132	1051656	16	forward
GCXG-30	32060	32983	16	reverse
GCXG-580	630434	630510	16	reverse
GCXG-664	713279	714247	16	reverse
GCXG-1811	1933054	1933632	16	reverse
GCXG-2338	2545769	2546635	16	reverse
GCXG-3138	3475648	3475724	16	reverse
GCXG-3152	3487181	3488392	16	reverse
GCXG-3310	3650722	3650798	16	reverse
GCXG-4291	4746640	4747137	16	reverse
GCXG-4298	4755447	4756067	16	reverse
GCXG-4318	4764588	4764863	16	reverse
GCXG-4787	5277172	5277951	16	reverse
GCXG-4845	5333567	5334904	16	reverse
GCXG-5606	6188166	6188855	16	reverse
GCXG-5669	6253542	6254411	16	reverse
GCXG-1026	1093251	1094129	17	forward
GCXG-1371	1464111	1464860	17	forward
GCXG-1689	1814995	1815135	17	forward
GCXG-2169	2352532	2353068	17	forward
GCXG-2285	2482045	2483031	17	forward
GCXG-2378	2593330	2594547	17	forward
GCXG-2524	2816347	2816979	17	forward
GCXG-3492	3845053	3845757	17	forward
GCXG-3715	4096124	4098826	17	forward
GCXG-4123	4542658	4543923	17	forward
GCXG-4185	4614024	4615328	17	forward
GCXG-451	504121	505029	17	forward
GCXG-4945	5442304	5442774	17	forward
GCXG-539	593273	594562	17	forward
GCXG-855	918617	919240	17	reverse
GCXG-1180	1258087	1258470	17	reverse
GCXG-1537	1647101	1648099	17	reverse
GCXG-2393	2612041	2612799	17	reverse
GCXG-2579	2885362	2886552	17	reverse
GCXG-3229	3570941	3571603	17	reverse
GCXG-3470	3821385	3822497	17	reverse
GCXG-3863	4264530	4265288	17	reverse
GCXG-4429	4884961	4887261	17	reverse
GCXG-4522	4983552	4984187	17	reverse
GCXG-4745	5232485	5233567	17	reverse
GCXG-5345	5902386	5904596	17	reverse
GCXG-1104	1170942	1172144	18	forward
GCXG-2134	2314512	2315690	18	forward
GCXG-2293	2490738	2492045	18	forward
GCXG-2539	2830831	2831322	18	forward
GCXG-2780	3110901	3111614	18	forward
GCXG-3667	4045160	4045570	18	forward
GCXG-4095	4515550	4516551	18	forward
GCXG-4730	5216203	5216745	18	forward
GCXG-5373	5934770	5935045	18	forward
GCXG-904	974482	975594	18	forward
GCXG-471	527324	527944	18	reverse
GCXG-1440	1544307	1545818	18	reverse
GCXG-1929	2065493	2066767	18	reverse
GCXG-2027	2181741	2182097	18	reverse
GCXG-3125	3460380	3463037	18	reverse
GCXG-3332	3675894	3676748	18	reverse
GCXG-3740	4124858	4125724	18	reverse
GCXG-3784	4173175	4173867	18	reverse
GCXG-3860	4261070	4262359	18	reverse
GCXG-4111	4532653	4533621	18	reverse
GCXG-4299	4756084	4756473	18	reverse
GCXG-4541	4996488	4997420	18	reverse
GCXG-5199	5745079	5745876	18	reverse
GCXG-5665	6250596	6252140	18	reverse
GCXG-5672	6255854	6256642	18	reverse
GCXG-1219	1300258	1300791	19	forward
GCXG-1406	1504605	1505729	19	forward
GCXG-1477	1585640	1586014	19	forward
GCXG-1788	1905797	1906822	19	forward
GCXG-2718	3040242	3042482	19	forward
GCXG-3524	3881093	3882421	19	forward
GCXG-5383	5943606	5944307	19	forward
GCXG-174	197011	198060	19	reverse
GCXG-2333	2532669	2539043	19	reverse
GCXG-2580	2886570	2887337	19	reverse
GCXG-3690	4067604	4068308	19	reverse
GCXG-4072	4492602	4493195	19	reverse
GCXG-4310	4761381	4761920	19	reverse
GCXG-4340	4785593	4785668	19	reverse
GCXG-4852	5339864	5343085	19	reverse
GCXG-5052	5557958	5559001	19	reverse
GCXG-5472	6034060	6035736	19	reverse
GCXG-2928	3242324	3243484	20	forward
GCXG-2964	3280165	3280878	20	forward
GCXG-3599	3968449	3969921	20	forward
GCXG-3942	4349502	4350332	20	forward
GCXG-4769	5257696	5258703	20	forward
GCXG-5579	6156854	6158158	20	forward
GCXG-745	801967	802239	20	reverse
GCXG-1509	1613234	1614649	20	reverse
GCXG-2043	2199762	2200664	20	reverse
GCXG-2980	3297240	3297884	20	reverse
GCXG-3065	3386270	3387829	20	reverse
GCXG-3435	3787489	3788211	20	reverse
GCXG-3499	3848795	3849583	20	reverse
GCXG-4406	4864665	4864973	20	reverse
GCXG-4523	4984205	4985470	20	reverse
GCXG-5078	5591452	5592612	20	reverse
GCXG-5410	5974190	5974381	20	reverse
GCXG-5435	6000761	6001378	20	reverse
GCXG-101	120164	121324	21	forward
GCXG-1978	2130854	2131813	21	forward
GCXG-2156	2336209	2337846	21	forward
GCXG-2519	2808743	2809987	21	forward
GCXG-2972	3288515	3289693	21	forward
GCXG-3621	3997822	3998115	21	forward
GCXG-5270	5820910	5822358	21	forward
GCXG-620	675390	675839	21	forward
GCXG-1838	1961227	1962024	21	reverse
GCXG-2804	3127860	3128270	21	reverse
GCXG-3159	3494567	3495424	21	reverse
GCXG-4480	4940535	4941788	21	reverse
GCXG-5029	5535685	5536131	21	reverse
GCXG-5591	6172223	6172690	21	reverse
GCXG-1114	1186606	1186986	22	forward
GCXG-1119	1192053	1192382	22	forward
GCXG-1376	1468510	1468890	22	forward
GCXG-139	155988	157085	22	forward
GCXG-1390	1483123	1483875	22	forward
GCXG-1764	1883661	1884632	22	forward
GCXG-1938	2075452	2076288	22	forward
GCXG-2181	2364816	2365058	22	forward
GCXG-231	258463	259761	22	forward
GCXG-2366	2577150	2579519	22	forward
GCXG-2372	2585299	2586411	22	forward
GCXG-239	267638	268681	22	forward
GCXG-2396	2614893	2615438	22	forward
GCXG-2423	2648626	2649972	22	forward
GCXG-2710	3027078	3028052	22	forward
GCXG-339	378096	378575	22	forward
GCXG-3920	4322788	4323735	22	forward
GCXG-4208	4642508	4643548	22	forward
GCXG-4230	4667904	4668467	22	forward
GCXG-987	1053848	1054543	22	forward
GCXG-205	232066	233100	22	reverse
GCXG-1882	2009482	2009724	22	reverse
GCXG-2546	2837334	2840489	22	reverse
GCXG-2592	2899924	2900349	22	reverse
GCXG-3008	3325379	3326122	22	reverse
GCXG-3411	3770470	3771480	22	reverse
GCXG-3556	3917209	3918228	22	reverse
GCXG-3645	4021972	4023177	22	reverse
GCXG-4065	4485824	4486180	22	reverse
GCXG-4297	4754423	4755424	22	reverse
GCXG-4368	4823080	4823364	22	reverse
GCXG-4478	4939194	4939277	22	reverse
GCXG-4682	5162069	5162449	22	reverse
GCXG-4996	5495821	5497290	22	reverse
GCXG-5075	5586370	5587551	22	reverse
GCXG-5287	5837449	5837892	22	reverse
GCXG-1036	1104009	1105364	23	forward
GCXG-1405	1503568	1504581	23	forward
GCXG-1850	1974821	1977076	23	forward
GCXG-1934	2071209	2071697	23	forward
GCXG-1979	2131835	2133367	23	forward
GCXG-2060	2219778	2220251	23	forward
GCXG-4019	4438619	4439353	23	forward
GCXG-4270	4714314	4714802	23	forward
GCXG-4873	5364071	5364736	23	forward
GCXG-4944	5441837	5442280	23	forward
GCXG-701	763657	765291	23	forward
GCXG-405	444687	445691	23	reverse
GCXG-2769	3103643	3103999	23	reverse
GCXG-3239	3582171	3583592	23	reverse
GCXG-4312	4762267	4762635	23	reverse
GCXG-4638	5106951	5109782	23	reverse
GCXG-4645	5116032	5116289	23	reverse
GCXG-119	137248	137976	24	forward
GCXG-3818	4210295	4212823	24	forward
GCXG-1132	1204785	1205006	24	reverse
GCXG-1860	1986989	1987756	24	reverse
GCXG-2144	2323554	2324783	24	reverse
GCXG-2326	2525049	2525846	24	reverse
GCXG-2541	2832369	2833130	24	reverse
GCXG-3864	4265306	4266445	24	reverse
GCXG-4367	4821385	4823055	24	reverse
GCXG-5182	5721892	5722242	24	reverse
GCXG-5193	5736470	5737321	24	reverse
GCXG-1105	1172163	1174214	25	forward
GCXG-114	133220	134293	25	forward
GCXG-115	134319	135233	25	forward
GCXG-1548	1660727	1661386	25	forward
GCXG-340	378598	380877	25	forward
GCXG-4274	4718557	4719393	25	forward
GCXG-4611	5077061	5077510	25	forward
GCXG-5166	5706191	5706526	25	forward
GCXG-5422	5986475	5988055	25	forward
GCXG-565	617662	618150	25	forward
GCXG-207	233929	234849	25	reverse
GCXG-1275	1363439	1364473	25	reverse
GCXG-1927	2062398	2064827	25	reverse
GCXG-2645	2956153	2956779	25	reverse
GCXG-3416	3774578	3775735	25	reverse
GCXG-3706	4087526	4088878	25	reverse
GCXG-4242	4679599	4680066	25	reverse
GCXG-4567	5028394	5028954	25	reverse
GCXG-4855	5344950	5345060	25	reverse
GCXG-1224	1303892	1304449	26	forward
GCXG-1327	1417965	1418738	26	forward
GCXG-1504	1608068	1609291	26	forward
GCXG-2201	2392945	2393397	26	forward
GCXG-2204	2394182	2395258	26	forward
GCXG-2514	2804230	2804994	26	forward
GCXG-2691	3008847	3009929	26	forward
GCXG-304	341111	342265	26	forward
GCXG-4816	5304011	5306962	26	forward
GCXG-5462	6024742	6025278	26	forward
GCXG-171	193799	194179	26	reverse
GCXG-996	1061207	1062034	26	reverse
GCXG-1544	1654480	1655319	26	reverse
GCXG-1804	1923044	1925770	26	reverse
GCXG-3353	3702093	3702950	26	reverse
GCXG-3859	4260399	4261043	26	reverse
GCXG-3866	4267145	4267345	26	reverse
GCXG-4004	4421802	4422380	26	reverse
GCXG-4114	4534710	4535807	26	reverse
GCXG-4341	4785688	4785761	26	reverse
GCXG-4563	5020402	5024952	26	reverse
GCXG-5288	5837915	5839078	26	reverse
GCXG-5362	5919585	5920715	26	reverse
GCXG-1098	1165141	1165854	27	forward
GCXG-1223	1303457	1303864	27	forward
GCXG-1464	1572552	1573523	27	forward
GCXG-1729	1851520	1851954	27	forward
GCXG-2115	2293153	2294985	27	forward
GCXG-2247	2435101	2436276	27	forward
GCXG-2678	2992853	2994700	27	forward
GCXG-4175	4604006	4604593	27	forward
GCXG-4240	4678210	4678929	27	forward
GCXG-5246	5797065	5797337	27	forward
GCXG-97	115299	117524	27	forward
GCXG-16	17366	18739	27	reverse
GCXG-179	202147	204066	27	reverse
GCXG-1768	1887058	1887297	27	reverse
GCXG-2240	2427014	2427544	27	reverse
GCXG-2651	2962303	2964579	27	reverse
GCXG-3870	4270148	4270471	27	reverse
GCXG-4543	4998063	4998512	27	reverse
GCXG-4677	5151078	5154209	27	reverse
GCXG-4719	5206720	5207007	27	reverse
GCXG-4838	5327427	5329949	27	reverse
GCXG-1	483	2027	28	forward
GCXG-1028	1095276	1096034	28	forward
GCXG-1682	1805218	1805724	28	forward
GCXG-199	227382	228194	28	forward
GCXG-2166	2349488	2350060	28	forward
GCXG-2424	2649995	2651278	28	forward
GCXG-3404	3763182	3763652	28	forward
GCXG-4149	4573741	4575303	28	forward
GCXG-4497	4959520	4959897	28	forward
GCXG-5016	5518483	5519682	28	forward
GCXG-5152	5692576	5693109	28	forward
GCXG-5231	5780963	5782249	28	forward
GCXG-5573	6152064	6152357	28	forward
GCXG-674	723696	723772	28	forward
GCXG-706	770156	770818	28	forward
GCXG-2464	2730518	2732503	28	reverse
GCXG-2578	2884206	2885333	28	reverse
GCXG-3003	3321043	3321675	28	reverse
GCXG-3736	4121114	4122391	28	reverse
GCXG-3911	4313763	4314452	28	reverse
GCXG-4301	4756979	4757095	28	reverse
GCXG-4348	4791951	4792026	28	reverse
GCXG-4418	4875638	4876792	28	reverse
GCXG-4776	5267479	5267554	28	reverse
GCXG-5134	5666234	5667667	28	reverse
GCXG-5323	5878754	5879971	28	reverse
GCXG-5477	6042963	6043038	28	reverse
GCXG-2265	2456569	2457480	29	forward
GCXG-2752	3075922	3076314	29	forward
GCXG-3722	4104092	4104715	29	forward
GCXG-3831	4231071	4232228	29	forward
GCXG-3945	4351595	4352494	29	forward
GCXG-4269	4713796	4714284	29	forward
GCXG-4539	4995229	4996089	29	forward
GCXG-4990	5488397	5489011	29	forward
GCXG-639	690043	690390	29	forward
GCXG-259	288384	289175	29	reverse
GCXG-765	821902	822885	29	reverse
GCXG-2335	2540079	2541167	29	reverse
GCXG-2386	2602346	2603530	29	reverse
GCXG-3347	3695179	3695481	29	reverse
GCXG-3872	4270921	4272135	29	reverse
GCXG-4934	5426895	5427686	29	reverse
GCXG-5031	5537059	5537289	29	reverse
GCXG-5595	6176516	6177295	29	reverse
GCXG-1485	1594087	1594566	30	forward
GCXG-222	248767	250200	30	forward
GCXG-2246	2433748	2435070	30	forward
GCXG-2355	2564290	2565549	30	forward
GCXG-4218	4654432	4655337	30	forward
GCXG-47	60656	61342	30	forward
GCXG-4728	5215091	5215639	30	forward
GCXG-5382	5942745	5943575	30	forward
GCXG-822	887583	888284	30	reverse
GCXG-3054	3373254	3374429	30	reverse
GCXG-3572	3933317	3934750	30	reverse
GCXG-4143	4568277	4569023	30	reverse
GCXG-4324	4767811	4769004	30	reverse
GCXG-4325	4769035	4771155	30	reverse
GCXG-4762	5249032	5249568	30	reverse
GCXG-5535	6105159	6106241	30	reverse
GCXG-5663	6248278	6249654	30	reverse
GCXG-1292	1383718	1384329	31	forward
GCXG-2309	2506978	2508261	31	forward
GCXG-2379	2594565	2595953	31	forward
GCXG-2751	3075411	3075890	31	forward
GCXG-4161	4587320	4587949	31	forward
GCXG-4559	5017040	5017417	31	forward
GCXG-487	544654	545097	31	forward
GCXG-5513	6082867	6083073	31	forward
GCXG-773	831301	831882	31	forward
GCXG-815	881486	881926	31	forward
GCXG-2534	2825636	2825926	31	reverse
GCXG-4062	4482261	4483364	31	reverse
GCXG-1003	1068193	1068456	32	forward
GCXG-1471	1577547	1578806	32	forward
GCXG-1969	2118585	2118893	32	forward
GCXG-2348	2554962	2556260	32	forward
GCXG-2435	2689567	2690127	32	forward
GCXG-2449	2702926	2704344	32	forward
GCXG-4209	4643571	4644545	32	forward
GCXG-634	686957	687946	32	forward
GCXG-905	975613	976377	32	forward
GCXG-66	76416	77399	32	reverse
GCXG-2143	2322778	2323521	32	reverse
GCXG-2255	2445545	2446564	32	reverse
GCXG-3126	3463056	3463856	32	reverse
GCXG-3235	3577320	3578480	32	reverse
GCXG-3573	3934781	3935767	32	reverse
GCXG-3681	4059957	4060592	32	reverse
GCXG-1022	1090606	1090857	33	forward
GCXG-1739	1858207	1859037	33	forward
GCXG-272	306174	306581	33	forward
GCXG-3538	3895324	3897357	33	forward
GCXG-5329	5883972	5884286	33	forward
GCXG-5604	6186603	6186893	33	forward
GCXG-2542	2833155	2834168	33	reverse
GCXG-2614	2923367	2923927	33	reverse
GCXG-3001	3319674	3320030	33	reverse
GCXG-3010	3327189	3328169	33	reverse
GCXG-4002	4419301	4420170	33	reverse
GCXG-4551	5008643	5010100	33	reverse
GCXG-4879	5370476	5370721	33	reverse
GCXG-1149	1220745	1221656	34	forward
GCXG-2031	2185527	2186225	34	forward
GCXG-3479	3833774	3835180	34	forward
GCXG-5150	5689964	5691727	34	forward
GCXG-524	580316	581098	34	forward
GCXG-705	768415	770121	34	forward
GCXG-346	385554	386351	34	reverse
GCXG-421	464568	465983	34	reverse
GCXG-2258	2448033	2448533	34	reverse
GCXG-2767	3100116	3102494	34	reverse
GCXG-3240	3583616	3584344	34	reverse
GCXG-3418	3776959	3777999	34	reverse
GCXG-5038	5543417	5544601	34	reverse
GCXG-1330	1420326	1421441	35	forward
GCXG-1681	1803626	1805182	35	forward
GCXG-1933	2070685	2071173	35	forward
GCXG-3468	3820006	3820272	35	forward
GCXG-4749	5237393	5238241	35	forward
GCXG-5510	6080124	6081356	35	forward
GCXG-177	199600	201639	35	reverse
GCXG-943	1011522	1011947	35	reverse
GCXG-1427	1528803	1529561	35	reverse
GCXG-2565	2866193	2867506	35	reverse
GCXG-3786	4179276	4181342	35	reverse
GCXG-3871	4270499	4270885	35	reverse
GCXG-5087	5603821	5605098	35	reverse
GCXG-1087	1153637	1155547	36	forward
GCXG-1618	1735706	1736152	36	forward
GCXG-2154	2333999	2335135	36	forward
GCXG-2875	3190211	3191650	36	forward
GCXG-3834	4234275	4235183	36	forward
GCXG-4426	4882404	4883570	36	forward
GCXG-4467	4925899	4926999	36	forward
GCXG-4662	5132629	5133843	36	forward
GCXG-5426	5990676	5991131	36	forward
GCXG-597	650158	650538	36	reverse
GCXG-1374	1467488	1467901	36	reverse
GCXG-2035	2190084	2190854	36	reverse
GCXG-3969	4377311	4379650	36	reverse
GCXG-5030	5536153	5537022	36	reverse
GCXG-5226	5776606	5777097	36	reverse
GCXG-5540	6111048	6112262	36	reverse
GCXG-2647	2959468	2960418	37	forward
GCXG-4037	4456695	4457324	37	forward
GCXG-4049	4469613	4470236	37	forward
GCXG-4388	4845938	4846675	37	forward
GCXG-5311	5863825	5865189	37	forward
GCXG-5554	6131088	6133274	37	forward
GCXG-1379	1470580	1470978	37	reverse
GCXG-3021	3338456	3338641	37	reverse
GCXG-3097	3420309	3420785	37	reverse
GCXG-3132	3468051	3468950	37	reverse
GCXG-3183	3515416	3516900	37	reverse
GCXG-3809	4203324	4204505	37	reverse
GCXG-3811	4204734	4205258	37	reverse
GCXG-4414	4871913	4873232	37	reverse
GCXG-1246	1328545	1329153	38	forward
GCXG-3223	3565189	3566124	38	forward
GCXG-3304	3642964	3645060	38	forward
GCXG-5321	5876664	5877857	38	forward
GCXG-892	962545	962925	38	forward
GCXG-56	69543	70091	38	reverse
GCXG-1627	1746231	1746653	38	reverse
GCXG-3648	4025586	4026773	38	reverse
GCXG-4565	5025614	5027383	38	reverse
GCXG-1853	1980165	1980977	39	forward
GCXG-2371	2584426	2585259	39	forward
GCXG-3254	3595942	3597279	39	forward
GCXG-3637	4012806	4013645	39	forward
GCXG-776	833454	833909	39	forward
GCXG-870	936459	937397	39	forward
GCXG-1806	1926176	1928626	39	reverse
GCXG-2083	2245986	2246456	39	reverse
GCXG-2108	2283419	2285323	39	reverse
GCXG-3104	3426928	3427446	39	reverse
GCXG-5391	5951115	5952443	39	reverse
GCXG-1040	1107763	1108908	40	forward
GCXG-1643	1762928	1763752	40	forward
GCXG-1787	1904995	1905756	40	forward
GCXG-193	219172	221544	40	forward
GCXG-21	22872	23960	40	forward
GCXG-2374	2587906	2589414	40	forward
GCXG-299	334734	335486	40	forward
GCXG-3515	3865897	3867666	40	forward
GCXG-4753	5240122	5240706	40	forward
GCXG-5376	5936370	5939222	40	forward
GCXG-5393	5953261	5953521	40	forward
GCXG-851	914412	915002	40	forward
GCXG-255	284197	284673	40	reverse
GCXG-434	482111	482665	40	reverse
GCXG-1943	2080661	2081812	40	reverse
GCXG-2340	2547508	2548530	40	reverse
GCXG-3497	3847718	3847933	40	reverse
GCXG-3568	3928331	3929338	40	reverse
GCXG-4355	4805195	4808710	40	reverse
GCXG-5095	5612268	5613692	40	reverse
GCXG-1069	1138314	1139672	41	forward
GCXG-2499	2791220	2791864	41	forward
GCXG-4752	5239466	5240080	41	forward
GCXG-5611	6193484	6194272	41	forward
GCXG-492	549294	549614	41	reverse
GCXG-1877	2003868	2004332	41	reverse
GCXG-2413	2635051	2635971	41	reverse
GCXG-3406	3764476	3765087	41	reverse
GCXG-3800	4195008	4195358	41	reverse
GCXG-5076	5587574	5589253	41	reverse
GCXG-5487	6054594	6055433	41	reverse
GCXG-5662	6247811	6248236	41	reverse
GCXG-1014	1080853	1081899	42	forward
GCXG-1609	1724244	1727075	42	forward
GCXG-2261	2451707	2452426	42	forward
GCXG-3445	3794819	3796966	42	forward
GCXG-4463	4921981	4922364	42	forward
GCXG-484	540839	541636	42	forward
GCXG-5374	5935064	5935945	42	forward
GCXG-627	680893	681351	42	forward
GCXG-910	980357	981379	42	forward
GCXG-433	481196	482068	42	reverse
GCXG-1940	2077047	2077583	42	reverse
GCXG-2889	3204514	3205080	42	reverse
GCXG-3108	3435372	3435944	42	reverse
GCXG-3196	3530467	3531708	42	reverse
GCXG-3414	3773430	3773948	42	reverse
GCXG-3868	4267717	4269576	42	reverse
GCXG-4782	5272455	5273471	42	reverse
GCXG-4920	5412569	5414236	42	reverse
GCXG-5181	5720950	5721849	42	reverse
GCXG-1706	1830879	1831970	43	forward
GCXG-2656	2969473	2969943	43	forward
GCXG-5245	5795954	5797021	43	forward
GCXG-590	641932	643164	43	reverse
GCXG-595	648931	649263	43	reverse
GCXG-2099	2266431	2267594	43	reverse
GCXG-2257	2447573	2447989	43	reverse
GCXG-2700	3017818	3018804	43	reverse
GCXG-3234	3575912	3577276	43	reverse
GCXG-3782	4170770	4172485	43	reverse
GCXG-3880	4279007	4279345	43	reverse
GCXG-4296	4753990	4754379	43	reverse
GCXG-1345	1436491	1436618	44	forward
GCXG-719	782229	782525	44	forward
GCXG-82	97754	98218	44	reverse
GCXG-1356	1447226	1448503	44	reverse
GCXG-1436	1538976	1539704	44	reverse
GCXG-1950	2090213	2091445	44	reverse
GCXG-2533	2824659	2825591	44	reverse
GCXG-4337	4783771	4784139	44	reverse
GCXG-4839	5329977	5331458	44	reverse
GCXG-5309	5861721	5862989	44	reverse
GCXG-1101	1168284	1169069	45	forward
GCXG-1484	1593151	1594041	45	forward
GCXG-1551	1666025	1668409	45	forward
GCXG-1555	1669989	1672034	45	forward
GCXG-2676	2992002	2992502	45	forward
GCXG-2929	3243505	3244299	45	forward
GCXG-606	660315	662708	45	forward
GCXG-890	960497	961324	45	forward
GCXG-3680	4059018	4059911	45	reverse
GCXG-3692	4068677	4069966	45	reverse
GCXG-3702	4082958	4083398	45	reverse
GCXG-5600	6181745	6182350	45	reverse
GCXG-1100	1167488	1168237	46	forward
GCXG-1212	1293267	1294091	46	forward
GCXG-2000	2150524	2150781	46	forward
GCXG-4076	4495126	4496865	46	forward
GCXG-411	449639	450046	46	forward
GCXG-640	690420	690674	46	forward
GCXG-92	108221	110929	46	forward
GCXG-1962	2108942	2109511	46	reverse
GCXG-2490	2780927	2781451	46	reverse
GCXG-3179	3514723	3514798	46	reverse
GCXG-4854	5343767	5344903	46	reverse
GCXG-5316	5871231	5871620	46	reverse
GCXG-5438	6002959	6003330	46	reverse
GCXG-1467	1574475	1575242	47	forward
GCXG-2054	2213693	2215054	47	forward
GCXG-618	674419	674619	47	forward
GCXG-326	363278	364321	47	reverse
GCXG-2472	2740977	2742353	47	reverse
GCXG-4151	4575908	4576324	47	reverse
GCXG-121	138818	140167	48	forward
GCXG-1798	1918275	1919273	48	forward
GCXG-2729	3051957	3053795	48	forward
GCXG-3748	4134138	4134542	48	forward
GCXG-4425	4882053	4882355	48	forward
GCXG-4615	5080757	5082394	48	forward
GCXG-896	966526	967521	48	forward
GCXG-408	446773	447342	48	reverse
GCXG-764	821383	821853	48	reverse
GCXG-1535	1645211	1646488	48	reverse
GCXG-2047	2205190	2206353	48	reverse
GCXG-2735	3059035	3060216	48	reverse
GCXG-3181	3515014	3515089	48	reverse
GCXG-4684	5163536	5163739	48	reverse
GCXG-4902	5388702	5390099	48	reverse
GCXG-5093	5609594	5610802	48	reverse
GCXG-3185	3517928	3518995	49	forward
GCXG-4086	4507897	4508358	49	forward
GCXG-4575	5038901	5040355	49	forward
GCXG-469	525469	526827	49	forward
GCXG-478	535085	535489	49	forward
GCXG-5529	6100135	6100770	49	forward
GCXG-274	306896	307828	49	reverse
GCXG-337	375951	377189	49	reverse
GCXG-1624	1741939	1743240	49	reverse
GCXG-2361	2571688	2572755	49	reverse
GCXG-2714	3031749	3035702	49	reverse
GCXG-3429	3782833	3783549	49	reverse
GCXG-3570	3930743	3931816	49	reverse
GCXG-4384	4842439	4842651	49	reverse
GCXG-4549	5003900	5004748	49	reverse
GCXG-4832	5322510	5322707	49	reverse
GCXG-5137	5674028	5675134	49	reverse
GCXG-5668	6253235	6253492	49	reverse
GCXG-2957	3273504	3274277	50	forward
GCXG-335	373725	374192	50	forward
GCXG-412	450093	450458	50	forward
GCXG-4445	4903466	4904596	50	forward
GCXG-4468	4927036	4927947	50	forward
GCXG-522	578029	578343	50	reverse
GCXG-2955	3271813	3272406	50	reverse
GCXG-3704	4084505	4085011	50	reverse
GCXG-4456	4915481	4917124	50	reverse
GCXG-4471	4930748	4931695	50	reverse
GCXG-4479	4939300	4940484	50	reverse
GCXG-4797	5286035	5287018	50	reverse
GCXG-4921	5414279	5414488	50	reverse
GCXG-5074	5585615	5586319	50	reverse
GCXG-5495	6063353	6063832	50	reverse
GCXG-5496	6063883	6064848	50	reverse
GCXG-5664	6249685	6250545	50	reverse
GCXG-1823	1947320	1947396	51	forward
GCXG-1835	1958759	1959031	51	forward
GCXG-2286	2483049	2483924	51	forward
GCXG-2866	3181137	3182348	51	forward
GCXG-2897	3209981	3212473	51	forward
GCXG-2930	3244345	3246330	51	forward
GCXG-3424	3779930	3780076	51	forward
GCXG-3495	3846837	3847148	51	forward
GCXG-3518	3870795	3873554	51	forward
GCXG-4178	4607578	4608384	51	reverse
GCXG-4524	4985491	4985730	51	reverse
GCXG-5037	5542073	5543365	51	reverse
GCXG-5454	6017624	6018778	51	reverse
GCXG-1641	1760713	1762380	52	forward
GCXG-2017	2171865	2171936	52	forward
GCXG-2175	2358024	2358311	52	forward
GCXG-290	323616	324572	52	forward
GCXG-2950	3265848	3268004	52	forward
GCXG-3441	3792290	3793060	52	forward
GCXG-4578	5043090	5044001	52	forward
GCXG-926	994143	994646	52	forward
GCXG-985	1052289	1053347	52	forward
GCXG-990	1056049	1057347	52	forward
GCXG-1805	1925797	1926123	52	reverse
GCXG-2547	2840512	2841966	52	reverse
GCXG-3437	3789093	3790097	52	reverse
GCXG-3644	4020669	4021919	52	reverse
GCXG-3793	4186781	4188190	52	reverse
GCXG-1479	1587023	1589284	53	forward
GCXG-1658	1777751	1779823	53	forward
GCXG-1981	2134393	2135406	53	forward
GCXG-2480	2754602	2754823	53	forward
GCXG-3117	3448012	3449643	53	forward
GCXG-4792	5283109	5283906	53	forward
GCXG-494	550520	550813	53	reverse
GCXG-2013	2166580	2167227	53	reverse
GCXG-2705	3021308	3021742	53	reverse
GCXG-2778	3109456	3109689	53	reverse
GCXG-3358	3705890	3706492	53	reverse
GCXG-3453	3804545	3804886	53	reverse
GCXG-3685	4062970	4063821	53	reverse
GCXG-3851	4252677	4253009	53	reverse
GCXG-4691	5169580	5170131	53	reverse
GCXG-4980	5478973	5479587	53	reverse
GCXG-5139	5675714	5677858	53	reverse
GCXG-1106	1174240	1175559	54	forward
GCXG-1654	1773682	1774548	54	forward
GCXG-1824	1947448	1947523	54	forward
GCXG-2342	2549748	2549906	54	forward
GCXG-2648	2960456	2961136	54	forward
GCXG-303	339959	341056	54	forward
GCXG-3297	3636621	3637679	54	forward
GCXG-3403	3762804	3763127	54	forward
GCXG-4358	4810538	4811341	54	forward
GCXG-5444	6008398	6008778	54	forward
GCXG-644	693596	694366	54	forward
GCXG-18	20068	21012	54	reverse
GCXG-368	408901	409449	54	reverse
GCXG-1536	1646537	1647046	54	reverse
GCXG-2694	3012280	3012537	54	reverse
GCXG-3930	4334403	4335221	54	reverse
GCXG-4031	4448893	4450392	54	reverse
GCXG-1045	1113129	1114718	55	forward
GCXG-1434	1537755	1538627	55	forward
GCXG-1679	1800629	1801795	55	forward
GCXG-2205	2395285	2395635	55	forward
GCXG-2275	2469286	2471019	55	forward
GCXG-289	322175	323560	55	forward
GCXG-2962	3278638	3279423	55	forward
GCXG-4661	5131428	5132573	55	forward
GCXG-5157	5698359	5700041	55	forward
GCXG-609	664783	665892	55	forward
GCXG-797	858646	858951	55	forward
GCXG-893	962964	964316	55	forward
GCXG-367	407250	408845	55	reverse
GCXG-1591	1709412	1709765	55	reverse
GCXG-2870	3185161	3185817	55	reverse
GCXG-2894	3208339	3208617	55	reverse
GCXG-3737	4122420	4123205	55	reverse
GCXG-3787	4181378	4182019	55	reverse
GCXG-4658	5128563	5129117	55	reverse
GCXG-5112	5631947	5632870	55	reverse
GCXG-216	242442	243374	56	forward
GCXG-3061	3381963	3383891	56	forward
GCXG-3409	3768184	3769530	56	forward
GCXG-4750	5238277	5238351	56	forward
GCXG-5011	5513732	5514670	56	forward
GCXG-63	74279	74716	56	reverse
GCXG-754	809574	810218	56	reverse
GCXG-1259	1340910	1341794	56	reverse
GCXG-1700	1826118	1826675	56	reverse
GCXG-1986	2139354	2140376	56	reverse
GCXG-2727	3050331	3050612	56	reverse
GCXG-3092	3414701	3415729	56	reverse
GCXG-3476	3829471	3830841	56	reverse
GCXG-3842	4243080	4243652	56	reverse
GCXG-3929	4333357	4334346	56	reverse
GCXG-4338	4784184	4784259	56	reverse
GCXG-4856	5345086	5345892	56	reverse
GCXG-5500	6067945	6069099	56	reverse
GCXG-1008	1073285	1073902	57	forward
GCXG-1642	1762433	1762870	57	forward
GCXG-221	247219	248709	57	forward
GCXG-24	25736	26653	57	forward
GCXG-633	686693	686899	57	forward
GCXG-2028	2182116	2182394	57	reverse
GCXG-5044	5548751	5549722	57	reverse
GCXG-5667	6252707	6253177	57	reverse
GCXG-1864	1990428	1991453	58	forward
GCXG-2739	3062939	3063913	58	forward
GCXG-2852	3170682	3171062	58	forward
GCXG-359	400248	401072	58	forward
GCXG-383	423460	423660	58	forward
GCXG-4083	4504001	4505449	58	forward
GCXG-446	496871	498361	58	forward
GCXG-4656	5126166	5126654	58	forward
GCXG-5440	6004277	6005140	58	forward
GCXG-645	694421	695023	58	forward
GCXG-756	811283	812386	58	reverse
GCXG-1279	1366538	1368280	58	reverse
GCXG-2522	2814767	2815282	58	reverse
GCXG-3123	3456543	3457910	58	reverse
GCXG-3163	3500668	3501750	58	reverse
GCXG-5552	6125796	6127997	58	reverse
GCXG-1343	1435493	1435825	59	forward
GCXG-1489	1596889	1597305	59	forward
GCXG-1513	1618612	1619847	59	forward
GCXG-2573	2877999	2878916	59	forward
GCXG-2660	2972699	2974069	59	forward
GCXG-2961	3277409	3278578	59	forward
GCXG-4558	5015535	5016980	59	forward
GCXG-5264	5813122	5813667	59	forward
GCXG-994	1059622	1060296	59	forward
GCXG-225	252913	253794	59	reverse
GCXG-2394	2612817	2614148	59	reverse
GCXG-3647	4024729	4025526	59	reverse
GCXG-3879	4277085	4278947	59	reverse
GCXG-4683	5162472	5163476	59	reverse
GCXG-5111	5630850	5631887	59	reverse
GCXG-5147	5686278	5687045	59	reverse
GCXG-414	451130	453178	60	forward
GCXG-5089	5606103	5606435	60	forward
GCXG-5272	5823716	5824726	60	forward
GCXG-782	839407	840324	60	forward
GCXG-662	711220	712020	60	reverse
GCXG-721	783009	783515	60	reverse
GCXG-1862	1989109	1989423	60	reverse
GCXG-1906	2034066	2034857	60	reverse
GCXG-1983	2136520	2137785	60	reverse
GCXG-3194	3528428	3529447	60	reverse
GCXG-3982	4394694	4396061	60	reverse
GCXG-4395	4853650	4854009	60	reverse
GCXG-4416	4874655	4875245	60	reverse
GCXG-4780	5270411	5271424	60	reverse
GCXG-5483	6049185	6050657	60	reverse
GCXG-2858	3174131	3174904	61	forward
GCXG-3118	3449697	3450776	61	forward
GCXG-322	358931	359920	61	forward
GCXG-3290	3630765	3631556	61	forward
GCXG-4222	4658450	4660159	61	forward
[truncated: 3,503 more rows]

## Sheet: PAO1GenesOverlapping
Pseudomonas aeruginosa PAO1 Overlapping between genes
[truncated: 830 more rows]

[truncated: 6 more sheets: PAO1DistTssATG, EcBl21DistGenes, EcBl21GenesOverlapping, W3110DistGenes, W3110GenesOverlapping, Hoja14]
